# Supplementary material for: Version 8 IMK/IAA MIPAS measurements of CFC-11, CFC-12, and HCFC-22
Source: Copernicus journal article supplement (doi:10.5194/amt-2023-172), 2023-08-11
Supplement: Supplementary file 2 [file amt-2023-172-supplement-version2.zip]

## *Supplement 2 to* **Version 8 IMK/IAA MIPAS measurements of CFC-11, CFC-12, and HCFC-22**

**Gabriele P. Stiller et al.**

*Correspondence to:* Gabriele P. Stiller (gabriele.stiller@kit.edu)

This document serves as reference for the definitions of the representative atmospheres used for the calculation of CFC-11 error budgets, as listed in Tab. S1, and as collection of the respective error budgets for FR data (2002-2004), which are listed in tables S2–S35 and depicted in figures

S1–S34, and the respective error budgets for RR data (2005-2012), which are listed in tables S36–S69 and depicted in figures S35–S68, and in the MIPAS middle atmosphere measurement mode, which are listed in tables S70–S103 and depicted in figures S69–S102.

The errors are presented as absolute errors in pptv.

**Table S1.** Labels and definitions of the representative atmospheric conditions which were used to calculate the error budget for FR and RR nominal measurement mode data ( $\beta_{\max} = 95^\circ$ ) and RR middle atmosphere measurement mode data ( $\beta_{\max} = 98^\circ$ ).

| representative atmosphere label   | month(s) used | latitude range                        | solar zenith angle range |
|-----------------------------------|---------------|---------------------------------------|--------------------------|
| Northern polar winter day         | Jan, Feb      | $65^\circ\text{N} - 90^\circ\text{N}$ | $< 90^\circ$             |
| Northern polar winter night       | Jan, Feb      | $65^\circ\text{N} - 90^\circ\text{N}$ | $> \beta_{\max}$         |
| Northern polar spring day         | Apr           | $65^\circ\text{N} - 90^\circ\text{N}$ | $< 90^\circ$             |
| Northern polar spring night       | Apr           | $65^\circ\text{N} - 90^\circ\text{N}$ | $> \beta_{\max}$         |
| Northern polar summer day         | Jul, Aug      | $65^\circ\text{N} - 90^\circ\text{N}$ | $< 90^\circ$             |
| Northern polar summer night       | Jul, Aug      | $65^\circ\text{N} - 90^\circ\text{N}$ | $> \beta_{\max}$         |
| Northern polar autumn day         | Oct           | $65^\circ\text{N} - 90^\circ\text{N}$ | $< 90^\circ$             |
| Northern polar autumn night       | Oct           | $65^\circ\text{N} - 90^\circ\text{N}$ | $> \beta_{\max}$         |
| Northern midlatitude winter day   | Jan, Feb      | $40^\circ\text{N} - 60^\circ\text{N}$ | $< 90^\circ$             |
| Northern midlatitude winter night | Jan, Feb      | $40^\circ\text{N} - 60^\circ\text{N}$ | $> \beta_{\max}$         |
| Northern midlatitude spring day   | Apr           | $40^\circ\text{N} - 60^\circ\text{N}$ | $< 90^\circ$             |
| Northern midlatitude spring night | Apr           | $40^\circ\text{N} - 60^\circ\text{N}$ | $> \beta_{\max}$         |
| Northern midlatitude summer day   | Jul, Aug      | $40^\circ\text{N} - 60^\circ\text{N}$ | $< 90^\circ$             |
| Northern midlatitude summer night | Jul, Aug      | $40^\circ\text{N} - 60^\circ\text{N}$ | $> \beta_{\max}$         |
| Northern midlatitude autumn day   | Oct           | $40^\circ\text{N} - 60^\circ\text{N}$ | $< 90^\circ$             |
| Northern midlatitude autumn night | Oct           | $40^\circ\text{N} - 60^\circ\text{N}$ | $> \beta_{\max}$         |
| Tropics day                       | Apr           | $20^\circ\text{S} - 20^\circ\text{N}$ | $< 90^\circ$             |
| Tropics night                     | Apr           | $20^\circ\text{S} - 20^\circ\text{N}$ | $> \beta_{\max}$         |
| Southern midlatitude winter day   | Jul, Aug      | $40^\circ\text{S} - 60^\circ\text{S}$ | $< 90^\circ$             |
| Southern midlatitude winter night | Jul, Aug      | $40^\circ\text{S} - 60^\circ\text{S}$ | $> \beta_{\max}$         |
| Southern midlatitude spring day   | Oct           | $40^\circ\text{S} - 60^\circ\text{S}$ | $< 90^\circ$             |
| Southern midlatitude spring night | Oct           | $40^\circ\text{S} - 60^\circ\text{S}$ | $> \beta_{\max}$         |
| Southern midlatitude summer day   | Jan, Feb      | $40^\circ\text{S} - 60^\circ\text{S}$ | $< 90^\circ$             |
| Southern midlatitude summer night | Jan, Feb      | $40^\circ\text{S} - 60^\circ\text{S}$ | $> \beta_{\max}$         |
| Southern midlatitude autumn day   | Apr           | $40^\circ\text{S} - 60^\circ\text{S}$ | $< 90^\circ$             |
| Southern midlatitude autumn night | Apr           | $40^\circ\text{S} - 60^\circ\text{S}$ | $> \beta_{\max}$         |
| Southern polar winter day         | Jul, Aug      | $65^\circ\text{S} - 90^\circ\text{S}$ | $< 90^\circ$             |
| Southern polar winter night       | Jul, Aug      | $65^\circ\text{S} - 90^\circ\text{S}$ | $> \beta_{\max}$         |
| Southern polar spring day         | Oct           | $65^\circ\text{S} - 90^\circ\text{S}$ | $< 90^\circ$             |
| Southern polar spring night       | Oct           | $65^\circ\text{S} - 90^\circ\text{S}$ | $> \beta_{\max}$         |
| Southern polar summer day         | Jan, Feb      | $65^\circ\text{S} - 90^\circ\text{S}$ | $< 90^\circ$             |
| Southern polar summer night       | Jan, Feb      | $65^\circ\text{S} - 90^\circ\text{S}$ | $> \beta_{\max}$         |
| Southern polar autumn day         | Apr           | $65^\circ\text{S} - 90^\circ\text{S}$ | $< 90^\circ$             |
| Southern polar autumn night       | Apr           | $65^\circ\text{S} - 90^\circ\text{S}$ | $> \beta_{\max}$         |

**Table S2.** CFC-11 error budget for Northern polar winter day. All uncertainties are  $1\sigma$ .

| altitude<br>(km) | mean target<br>(pptv) | interf<br>(pptv) | ILS<br>(pptv) | shift<br>(pptv) | offset<br>(pptv) | gain<br>(pptv) | spectro<br>(pptv) | T+LOS<br>(pptv) | noise<br>(pptv) | random<br>(pptv) | syst<br>(pptv) | total<br>(pptv) |
|------------------|-----------------------|------------------|---------------|-----------------|------------------|----------------|-------------------|-----------------|-----------------|------------------|----------------|-----------------|
| 5                | 300.41                | 11.09            | 2.22          | 0.35            | 4.62             | 1.73           | 17.15             | 7.90            | 8.88            | 18.22            | 15.99          | 24.24           |
| 8                | 257.25                | 5.83             | 1.48          | 0.24            | 2.89             | 5.10           | 12.37             | 4.65            | 5.40            | 11.15            | 12.25          | 16.56           |
| 11               | 224.32                | 2.91             | 1.38          | 0.17            | 2.05             | 3.52           | 12.06             | 3.54            | 3.73            | 7.00             | 12.25          | 14.11           |
| 14               | 170.40                | 2.92             | 4.44          | 0.42            | 1.69             | 3.04           | 14.50             | 3.82            | 3.23            | 7.98             | 14.56          | 16.60           |
| 17               | 92.28                 | 2.52             | 4.46          | 0.62            | 1.70             | 2.06           | 11.24             | 2.79            | 3.80            | 6.69             | 11.73          | 13.50           |
| 20               | 33.64                 | 2.61             | 1.74          | 0.21            | 1.87             | 1.06           | 6.12              | 1.47            | 4.98            | 7.34             | 5.01           | 8.89            |
| 23               | 14.95                 | 2.60             | 0.38          | 0.11            | 2.13             | 0.38           | 2.08              | 0.72            | 6.47            | 7.46             | 1.60           | 7.63            |
| 26               | 9.19                  | 2.59             | 0.19          | 0.04            | 2.34             | 0.13           | 1.04              | 0.44            | 8.08            | 8.86             | 0.51           | 8.88            |
| 29               | 13.02                 | 2.23             | 0.16          | 0.04            | 2.48             | 0.14           | 1.11              | 0.32            | 9.89            | 10.48            | 0.64           | 10.50           |
| 32               | 10.50                 | 1.68             | 0.19          | 0.05            | 2.69             | 0.13           | 1.02              | 0.31            | 11.78           | 12.23            | 0.66           | 12.25           |
| 35               | 6.75                  | 1.33             | 0.14          | 0.05            | 3.26             | 0.11           | 0.93              | 0.22            | 13.87           | 14.33            | 0.69           | 14.35           |
| 38               | 8.60                  | 1.18             | 0.21          | 0.04            | 4.95             | 0.11           | 1.65              | 0.20            | 15.63           | 16.45            | 1.47           | 16.52           |
| 41               | 9.86                  | 1.20             | 0.26          | 0.04            | 8.49             | 0.13           | 1.95              | 0.21            | 17.56           | 19.55            | 1.82           | 19.64           |

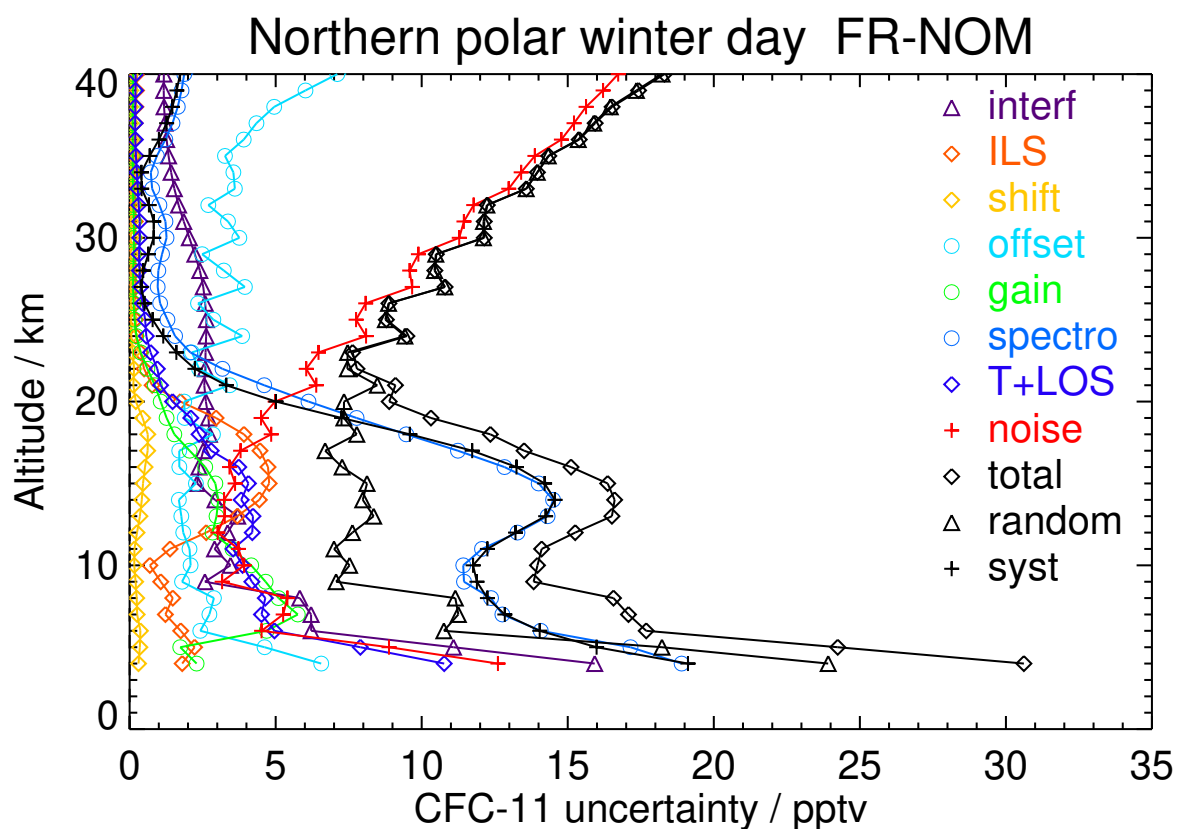**Figure S1.** V8H\_F-11\_61 Northern polar winter day

**Table S3.** CFC-11 error budget for Northern polar winter night. All uncertainties are  $1\sigma$ .

| altitude<br>(km) | mean target<br>(pptv) | interf<br>(pptv) | ILS<br>(pptv) | shift<br>(pptv) | offset<br>(pptv) | gain<br>(pptv) | spectro<br>(pptv) | T+LOS<br>(pptv) | noise<br>(pptv) | random<br>(pptv) | syst<br>(pptv) | total<br>(pptv) |
|------------------|-----------------------|------------------|---------------|-----------------|------------------|----------------|-------------------|-----------------|-----------------|------------------|----------------|-----------------|
| 5                | 298.97                | 11.81            | 3.60          | 0.24            | 5.13             | 3.25           | 16.50             | 8.20            | 9.69            | 19.05            | 16.12          | 24.96           |
| 8                | 235.39                | 2.55             | 2.55          | 0.36            | 3.11             | 6.59           | 10.05             | 3.07            | 5.67            | 8.96             | 11.34          | 14.45           |
| 11               | 236.10                | 3.89             | 1.82          | 0.15            | 2.20             | 2.76           | 12.93             | 4.03            | 3.93            | 7.83             | 12.98          | 15.16           |
| 14               | 160.40                | 1.77             | 4.49          | 0.45            | 1.59             | 3.46           | 14.78             | 4.00            | 3.32            | 6.82             | 15.39          | 16.83           |
| 17               | 82.84                 | 2.95             | 4.29          | 0.42            | 1.35             | 1.42           | 11.02             | 3.14            | 3.70            | 6.83             | 11.38          | 13.27           |
| 20               | 25.49                 | 2.35             | 1.99          | 0.24            | 1.30             | 0.90           | 5.75              | 1.71            | 4.84            | 6.85             | 4.95           | 8.45            |
| 23               | 13.25                 | 2.74             | 0.55          | 0.15            | 1.53             | 0.31           | 1.88              | 0.76            | 6.33            | 7.31             | 1.00           | 7.38            |
| 26               | 9.70                  | 2.69             | 0.21          | 0.05            | 1.91             | 0.13           | 1.32              | 0.47            | 7.99            | 8.72             | 0.81           | 8.76            |
| 29               | 11.86                 | 2.37             | 0.18          | 0.05            | 2.22             | 0.13           | 0.98              | 0.35            | 9.53            | 10.11            | 0.48           | 10.13           |
| 32               | 11.06                 | 1.81             | 0.28          | 0.06            | 2.70             | 0.11           | 1.02              | 0.29            | 11.30           | 11.80            | 0.45           | 11.81           |
| 35               | 9.25                  | 1.40             | 0.18          | 0.05            | 3.42             | 0.10           | 0.87              | 0.24            | 13.34           | 13.87            | 0.50           | 13.88           |
| 38               | 2.34                  | 1.23             | 0.15          | 0.04            | 4.51             | 0.11           | 1.25              | 0.21            | 15.16           | 15.88            | 1.04           | 15.92           |
| 41               | -2.94                 | 1.23             | 0.20          | 0.04            | 7.46             | 0.13           | 1.73              | 0.22            | 16.63           | 18.29            | 1.56           | 18.36           |

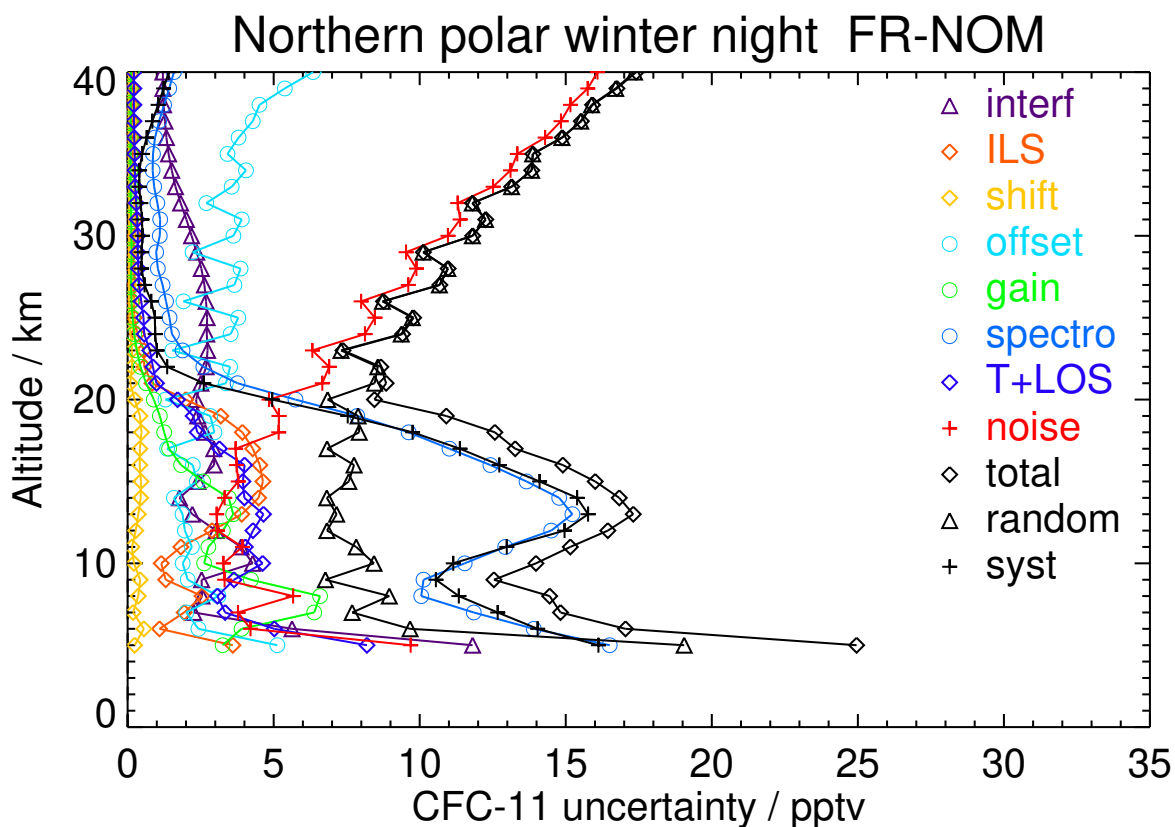**Figure S2.** V8H\_F-11\_61 Northern polar winter night

**Table S4.** CFC-11 error budget for Northern polar spring day. All uncertainties are  $1\sigma$ .

| altitude<br>(km) | mean target<br>(pptv) | interf<br>(pptv) | ILS<br>(pptv) | shift<br>(pptv) | offset<br>(pptv) | gain<br>(pptv) | spectro<br>(pptv) | T+LOS<br>(pptv) | noise<br>(pptv) | random<br>(pptv) | syst<br>(pptv) | total<br>(pptv) |
|------------------|-----------------------|------------------|---------------|-----------------|------------------|----------------|-------------------|-----------------|-----------------|------------------|----------------|-----------------|
| 8                | 245.61                | 4.62             | 0.83          | 0.23            | 1.87             | 5.07           | 14.36             | 4.61            | 3.18            | 8.40             | 14.78          | 16.99           |
| 11               | 209.93                | 3.98             | 0.65          | 0.09            | 1.76             | 2.81           | 10.64             | 3.73            | 2.77            | 7.10             | 10.56          | 12.73           |
| 14               | 135.43                | 2.44             | 4.92          | 0.33            | 2.05             | 3.06           | 15.45             | 4.03            | 2.82            | 6.79             | 16.14          | 17.52           |
| 17               | 53.07                 | 2.92             | 3.24          | 0.42            | 2.54             | 1.12           | 7.27              | 2.07            | 3.61            | 6.88             | 7.05           | 9.85            |
| 20               | 28.12                 | 2.57             | 1.25          | 0.22            | 3.24             | 0.65           | 3.38              | 0.96            | 4.87            | 6.91             | 2.73           | 7.43            |
| 23               | 14.45                 | 2.64             | 0.28          | 0.11            | 3.99             | 0.34           | 1.84              | 0.57            | 6.39            | 8.14             | 1.14           | 8.22            |
| 26               | 9.28                  | 2.58             | 0.16          | 0.03            | 4.51             | 0.14           | 1.01              | 0.40            | 8.07            | 9.64             | 0.65           | 9.66            |
| 29               | 5.41                  | 2.31             | 0.22          | 0.04            | 4.62             | 0.12           | 0.88              | 0.32            | 9.59            | 10.91            | 0.69           | 10.93           |
| 32               | 2.37                  | 1.71             | 0.16          | 0.07            | 4.37             | 0.09           | 0.70              | 0.23            | 10.93           | 11.92            | 0.21           | 11.92           |
| 35               | 4.06                  | 1.30             | 0.12          | 0.07            | 3.79             | 0.11           | 0.95              | 0.17            | 12.60           | 13.24            | 0.77           | 13.26           |
| 38               | 6.31                  | 1.10             | 0.14          | 0.06            | 4.04             | 0.18           | 1.27              | 0.17            | 14.20           | 14.82            | 1.11           | 14.86           |
| 41               | 4.76                  | 1.17             | 0.18          | 0.05            | 5.32             | 0.19           | 1.58              | 0.19            | 15.51           | 16.45            | 1.42           | 16.52           |

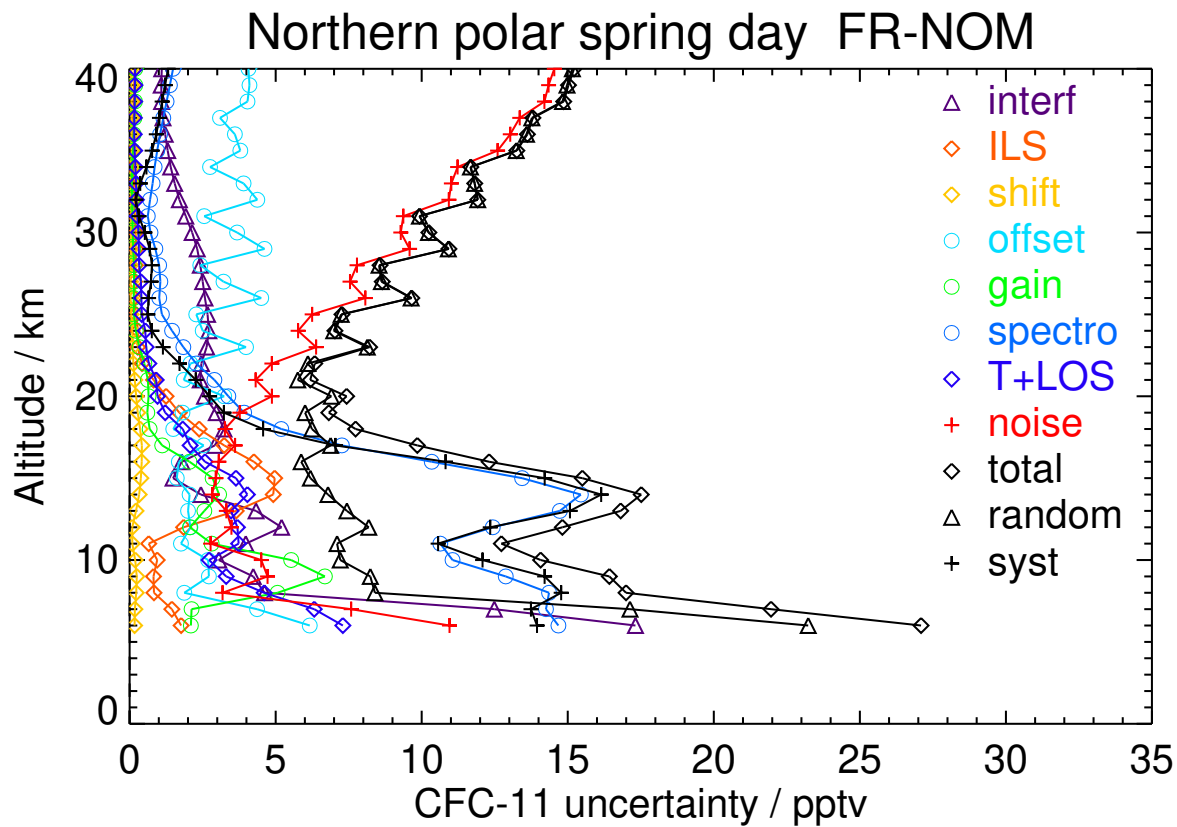

**Figure S3.** V8H\_F-11\_61 Northern polar spring day

**Table S5.** CFC-11 error budget for Northern polar spring night. All uncertainties are  $1\sigma$ .

| altitude<br>(km) | mean target<br>(pptv) | interf<br>(pptv) | ILS<br>(pptv) | shift<br>(pptv) | offset<br>(pptv) | gain<br>(pptv) | spectro<br>(pptv) | T+LOS<br>(pptv) | noise<br>(pptv) | random<br>(pptv) | syst<br>(pptv) | total<br>(pptv) |
|------------------|-----------------------|------------------|---------------|-----------------|------------------|----------------|-------------------|-----------------|-----------------|------------------|----------------|-----------------|
| 8                | 252.76                | 5.42             | 1.44          | 0.31            | 2.03             | 4.56           | 14.97             | 5.06            | 3.40            | 9.11             | 15.33          | 17.83           |
| 11               | 202.35                | 3.33             | 1.08          | 0.11            | 1.76             | 2.88           | 11.13             | 3.50            | 2.76            | 6.81             | 11.00          | 12.94           |
| 14               | 142.51                | 2.86             | 4.55          | 0.35            | 2.06             | 2.71           | 14.33             | 3.74            | 2.86            | 7.13             | 14.74          | 16.38           |
| 17               | 69.53                 | 2.68             | 3.75          | 0.48            | 2.57             | 1.31           | 9.03              | 2.20            | 3.73            | 7.30             | 8.76           | 11.40           |
| 20               | 31.64                 | 2.66             | 1.57          | 0.20            | 3.24             | 0.83           | 4.69              | 1.06            | 5.02            | 7.51             | 3.56           | 8.31            |
| 23               | 14.52                 | 2.59             | 0.34          | 0.10            | 3.93             | 0.35           | 1.92              | 0.56            | 6.56            | 8.25             | 1.18           | 8.33            |
| 26               | 10.07                 | 2.57             | 0.17          | 0.04            | 4.46             | 0.21           | 1.23              | 0.40            | 8.27            | 9.79             | 0.78           | 9.83            |
| 29               | 5.18                  | 2.28             | 0.19          | 0.05            | 4.46             | 0.14           | 0.97              | 0.32            | 9.80            | 11.04            | 0.73           | 11.06           |
| 32               | 0.95                  | 1.71             | 0.17          | 0.07            | 4.00             | 0.07           | 0.63              | 0.24            | 11.20           | 12.03            | 0.26           | 12.04           |
| 35               | 1.22                  | 1.26             | 0.13          | 0.09            | 3.56             | 0.12           | 0.92              | 0.18            | 12.83           | 13.39            | 0.74           | 13.41           |
| 38               | 8.79                  | 1.11             | 0.18          | 0.08            | 3.88             | 0.18           | 1.34              | 0.18            | 14.46           | 15.03            | 1.19           | 15.08           |
| 41               | 5.34                  | 1.23             | 0.21          | 0.06            | 5.48             | 0.18           | 1.65              | 0.18            | 15.77           | 16.75            | 1.51           | 16.82           |

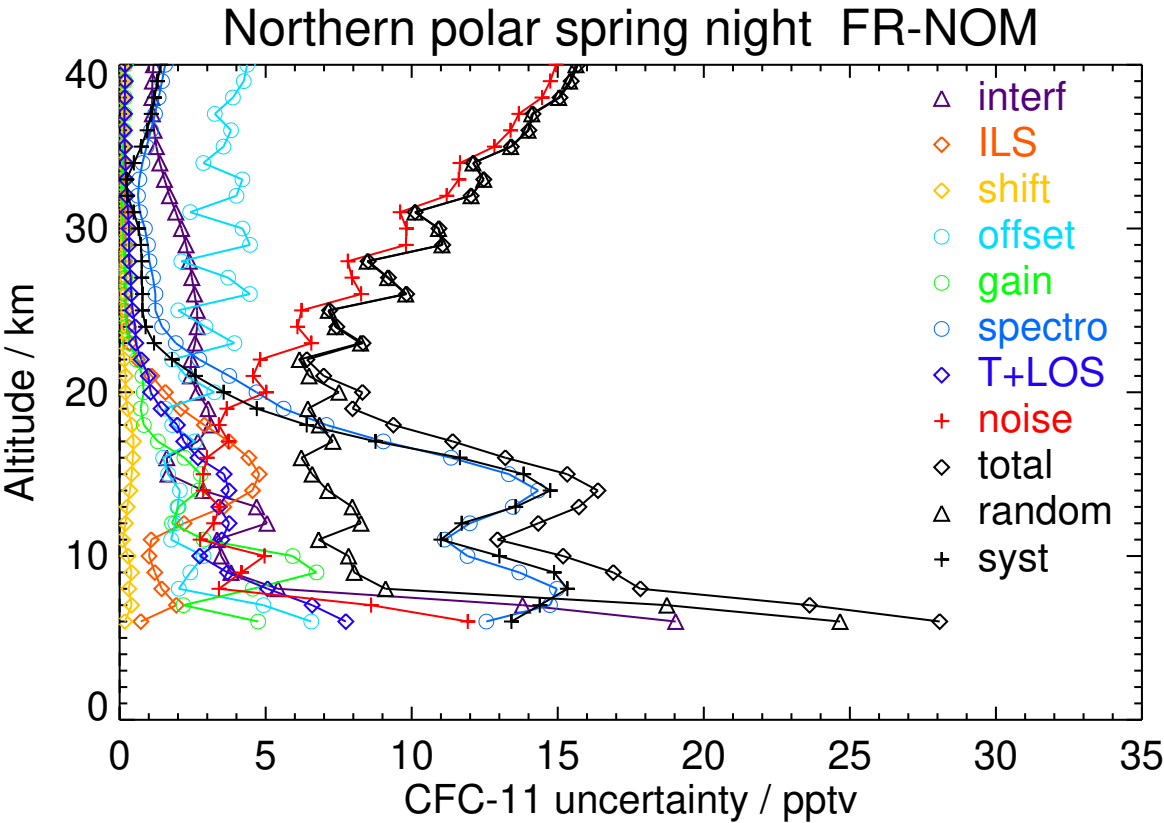

**Figure S4.** V8H\_F-11\_61 Northern polar spring night

**Table S6.** CFC-11 error budget for Northern polar summer day. All uncertainties are  $1\sigma$ .

| altitude<br>(km) | mean target<br>(pptv) | interf<br>(pptv) | ILS<br>(pptv) | shift<br>(pptv) | offset<br>(pptv) | gain<br>(pptv) | spectro<br>(pptv) | T+LOS<br>(pptv) | noise<br>(pptv) | random<br>(pptv) | syst<br>(pptv) | total<br>(pptv) |
|------------------|-----------------------|------------------|---------------|-----------------|------------------|----------------|-------------------|-----------------|-----------------|------------------|----------------|-----------------|
| 8                | 249.17                | 11.39            | 1.25          | 0.32            | 3.71             | 2.47           | 9.42              | 3.58            | 7.39            | 15.51            | 8.18           | 17.54           |
| 11               | 229.31                | 2.94             | 1.45          | 0.17            | 2.30             | 5.43           | 11.36             | 2.73            | 4.51            | 7.46             | 12.11          | 14.22           |
| 14               | 218.52                | 4.17             | 1.94          | 0.14            | 1.60             | 2.49           | 11.03             | 3.03            | 3.18            | 6.64             | 11.26          | 13.08           |
| 17               | 163.62                | 2.03             | 5.48          | 0.74            | 1.27             | 3.34           | 14.46             | 3.18            | 3.03            | 5.42             | 15.70          | 16.61           |
| 20               | 72.48                 | 2.81             | 3.11          | 0.34            | 1.28             | 1.46           | 9.88              | 2.16            | 3.79            | 5.64             | 10.31          | 11.75           |
| 23               | 23.63                 | 2.44             | 0.44          | 0.38            | 1.51             | 0.71           | 2.93              | 1.07            | 4.95            | 5.91             | 2.91           | 6.59            |
| 26               | 7.80                  | 2.56             | 0.22          | 0.06            | 1.88             | 0.16           | 1.15              | 0.57            | 6.46            | 7.27             | 0.88           | 7.32            |
| 29               | 3.34                  | 2.26             | 0.15          | 0.04            | 2.21             | 0.09           | 0.77              | 0.38            | 8.10            | 8.73             | 0.46           | 8.74            |
| 32               | 2.81                  | 1.63             | 0.16          | 0.06            | 2.40             | 0.08           | 0.70              | 0.28            | 9.75            | 10.19            | 0.29           | 10.20           |
| 35               | 7.13                  | 1.30             | 0.11          | 0.12            | 2.65             | 0.14           | 0.66              | 0.22            | 11.52           | 11.91            | 0.35           | 11.92           |
| 38               | 4.11                  | 1.09             | 0.14          | 0.13            | 2.91             | 0.18           | 1.07              | 0.22            | 13.54           | 13.91            | 0.90           | 13.94           |
| 41               | 0.55                  | 1.05             | 0.17          | 0.10            | 3.73             | 0.20           | 1.61              | 0.19            | 14.55           | 15.07            | 1.56           | 15.15           |

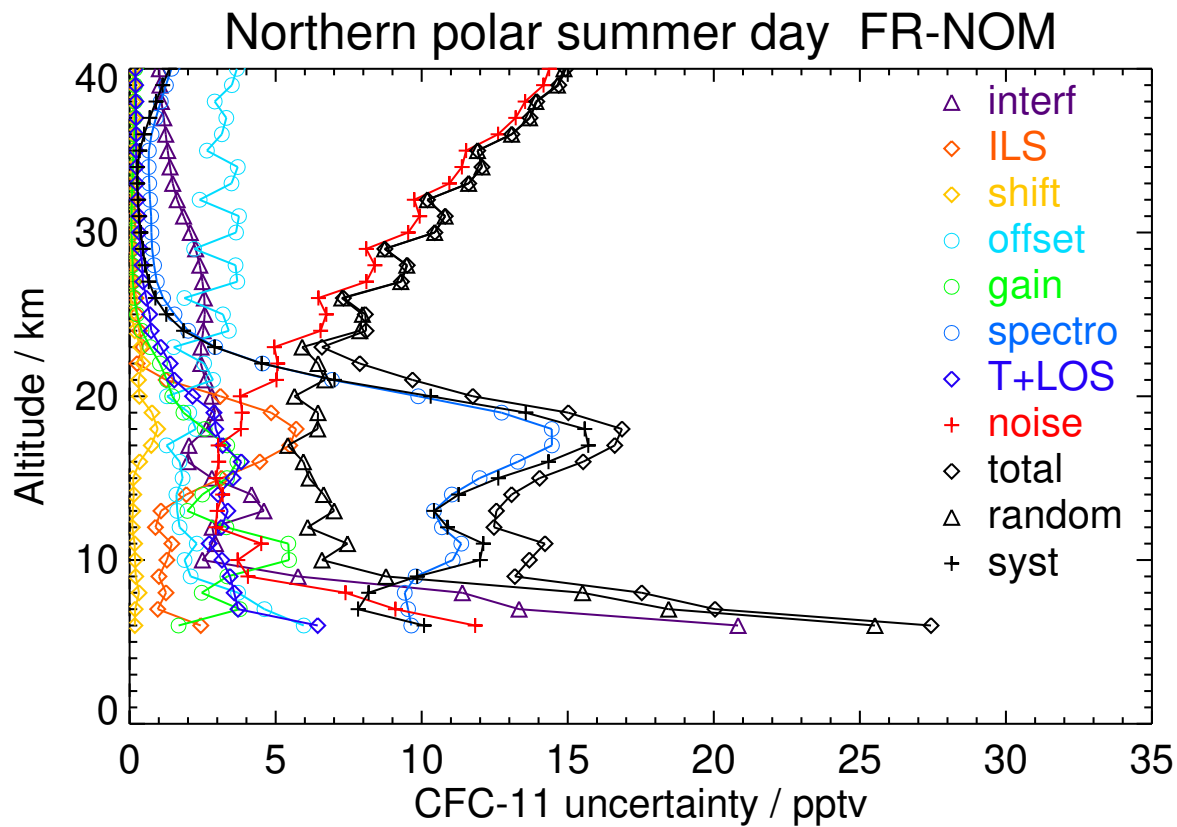

**Figure S5.** V8H\_F-11\_61 Northern polar summer day

**Table S7.** CFC-11 error budget for Northern polar summer night. All uncertainties are  $1\sigma$ .

| altitude<br>(km) | mean target<br>(pptv) | interf<br>(pptv) | ILS<br>(pptv) | shift<br>(pptv) | offset<br>(pptv) | gain<br>(pptv) | spectro<br>(pptv) | T+LOS<br>(pptv) | noise<br>(pptv) | random<br>(pptv) | syst<br>(pptv) | total<br>(pptv) |
|------------------|-----------------------|------------------|---------------|-----------------|------------------|----------------|-------------------|-----------------|-----------------|------------------|----------------|-----------------|
| 8                | 262.23                | 13.09            | 0.84          | 0.17            | 4.62             | 2.88           | 8.94              | 4.22            | 9.27            | 17.55            | 8.78           | 19.62           |
| 11               | 228.75                | 3.02             | 0.64          | 0.11            | 2.36             | 6.03           | 11.54             | 2.75            | 4.82            | 7.22             | 12.77          | 14.68           |
| 14               | 226.54                | 4.37             | 1.50          | 0.08            | 1.63             | 2.20           | 10.66             | 3.10            | 3.37            | 6.76             | 10.86          | 12.79           |
| 17               | 168.73                | 2.00             | 5.73          | 0.50            | 1.13             | 3.57           | 15.16             | 3.44            | 3.02            | 5.31             | 16.55          | 17.38           |
| 20               | 77.50                 | 2.68             | 3.73          | 0.33            | 0.97             | 1.50           | 10.60             | 2.44            | 3.72            | 5.48             | 11.25          | 12.51           |
| 23               | 21.33                 | 2.53             | 0.39          | 0.38            | 1.09             | 0.74           | 3.38              | 1.23            | 4.87            | 5.84             | 3.32           | 6.72            |
| 26               | 7.29                  | 2.52             | 0.24          | 0.06            | 1.46             | 0.15           | 1.06              | 0.62            | 6.45            | 7.14             | 0.82           | 7.19            |
| 29               | 5.71                  | 2.33             | 0.12          | 0.04            | 1.87             | 0.07           | 0.79              | 0.39            | 8.21            | 8.76             | 0.56           | 8.78            |
| 32               | 2.03                  | 1.60             | 0.20          | 0.07            | 2.27             | 0.08           | 0.66              | 0.31            | 9.95            | 10.35            | 0.35           | 10.36           |
| 35               | 1.23                  | 1.22             | 0.08          | 0.10            | 2.66             | 0.09           | 0.79              | 0.20            | 11.78           | 12.14            | 0.68           | 12.16           |
| 38               | 3.45                  | 1.15             | 0.19          | 0.10            | 3.01             | 0.10           | 1.37              | 0.18            | 13.79           | 14.17            | 1.30           | 14.23           |
| 41               | -0.01                 | 1.05             | 0.23          | 0.08            | 3.96             | 0.13           | 1.72              | 0.18            | 14.83           | 15.39            | 1.67           | 15.48           |

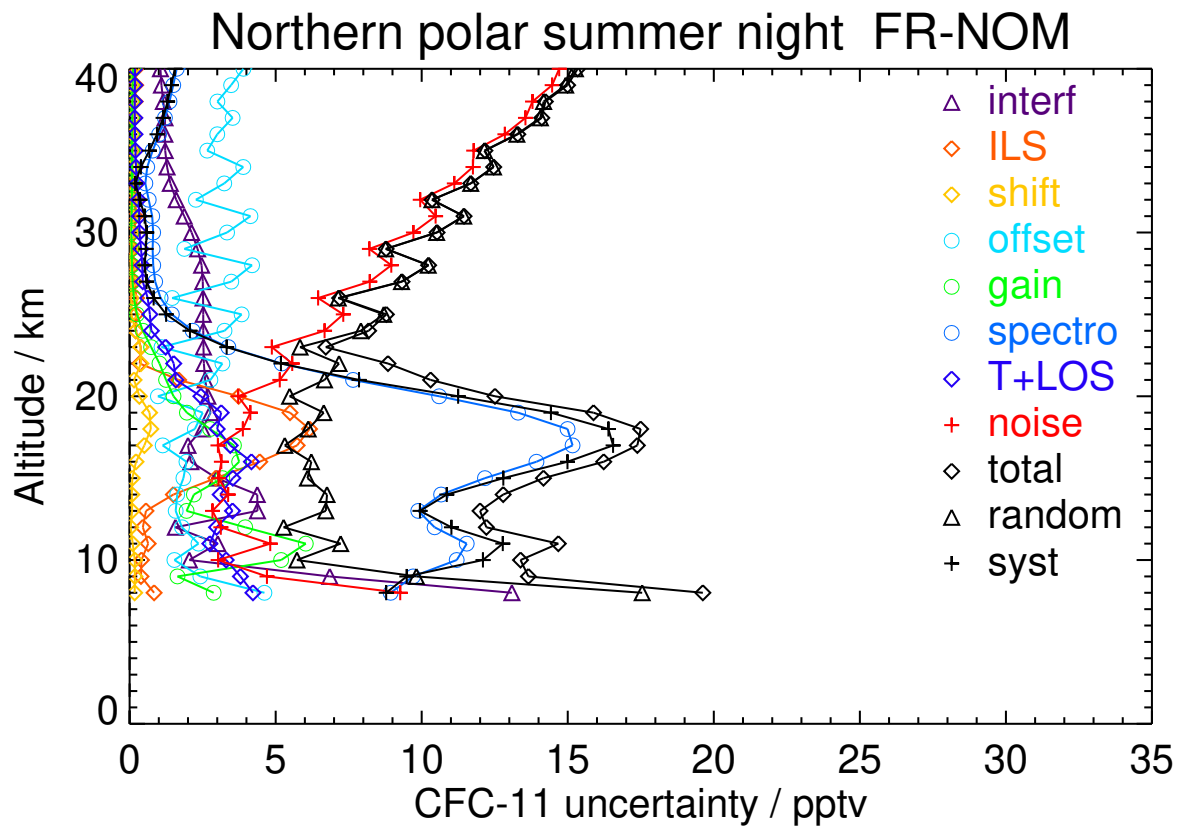

**Figure S6.** V8H\_F-11\_61 Northern polar summer night

**Table S8.** CFC-11 error budget for Northern polar autumn day. All uncertainties are  $1\sigma$ .

| altitude<br>(km) | mean target<br>(pptv) | interf<br>(pptv) | ILS<br>(pptv) | shift<br>(pptv) | offset<br>(pptv) | gain<br>(pptv) | spectro<br>(pptv) | T+LOS<br>(pptv) | noise<br>(pptv) | random<br>(pptv) | syst<br>(pptv) | total<br>(pptv) |
|------------------|-----------------------|------------------|---------------|-----------------|------------------|----------------|-------------------|-----------------|-----------------|------------------|----------------|-----------------|
| 8                | 246.26                | 3.14             | 1.00          | 0.80            | 2.15             | 6.41           | 11.05             | 3.26            | 3.74            | 7.27             | 12.29          | 14.28           |
| 11               | 244.60                | 4.39             | 0.47          | 0.32            | 1.89             | 2.81           | 10.59             | 3.87            | 3.13            | 7.42             | 10.63          | 12.97           |
| 14               | 208.24                | 2.31             | 2.12          | 0.23            | 1.83             | 4.31           | 12.82             | 3.77            | 2.82            | 6.10             | 13.46          | 14.77           |
| 17               | 147.46                | 3.06             | 3.91          | 0.51            | 2.07             | 2.81           | 13.11             | 3.67            | 3.34            | 6.62             | 13.77          | 15.28           |
| 20               | 60.57                 | 2.43             | 3.68          | 0.36            | 2.55             | 1.66           | 10.16             | 2.41            | 4.53            | 7.07             | 10.40          | 12.58           |
| 23               | 17.67                 | 2.53             | 0.35          | 0.07            | 3.33             | 0.46           | 3.02              | 1.00            | 6.42            | 7.87             | 2.69           | 8.31            |
| 26               | 6.18                  | 2.46             | 0.19          | 0.05            | 3.97             | 0.18           | 1.48              | 0.53            | 8.60            | 9.86             | 1.07           | 9.92            |
| 29               | 6.95                  | 2.19             | 0.16          | 0.05            | 4.19             | 0.13           | 1.28              | 0.38            | 10.68           | 11.73            | 0.81           | 11.76           |
| 32               | 6.37                  | 1.60             | 0.13          | 0.05            | 3.76             | 0.12           | 0.92              | 0.32            | 12.62           | 13.29            | 0.57           | 13.30           |
| 35               | 1.67                  | 1.19             | 0.15          | 0.05            | 3.98             | 0.12           | 0.94              | 0.25            | 14.68           | 15.28            | 0.40           | 15.28           |
| 38               | -0.62                 | 1.05             | 0.16          | 0.05            | 5.62             | 0.14           | 1.44              | 0.22            | 16.50           | 17.48            | 1.29           | 17.53           |
| 41               | 2.52                  | 1.14             | 0.24          | 0.05            | 9.08             | 0.10           | 2.02              | 0.22            | 17.97           | 20.17            | 1.96           | 20.27           |

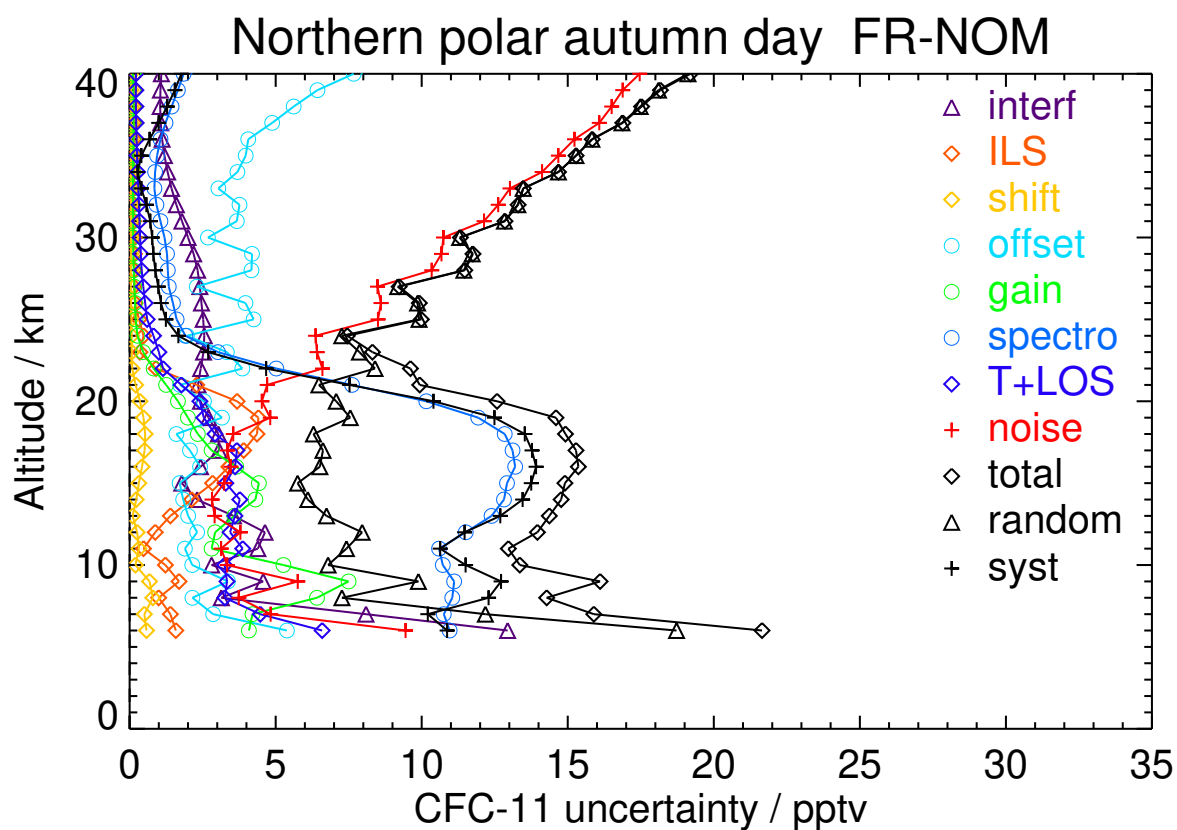**Figure S7.** V8H\_F-11\_61 Northern polar autumn day

**Table S9.** CFC-11 error budget for Northern polar autumn night. All uncertainties are  $1\sigma$ .

| altitude<br>(km) | mean target<br>(pptv) | interf<br>(pptv) | ILS<br>(pptv) | shift<br>(pptv) | offset<br>(pptv) | gain<br>(pptv) | spectro<br>(pptv) | T+LOS<br>(pptv) | noise<br>(pptv) | random<br>(pptv) | syst<br>(pptv) | total<br>(pptv) |
|------------------|-----------------------|------------------|---------------|-----------------|------------------|----------------|-------------------|-----------------|-----------------|------------------|----------------|-----------------|
| 8                | 249.00                | 2.96             | 0.90          | 0.26            | 2.00             | 6.11           | 12.19             | 3.70            | 3.50            | 7.02             | 13.28          | 15.02           |
| 11               | 238.34                | 4.10             | 0.55          | 0.10            | 1.80             | 2.47           | 10.17             | 3.83            | 2.88            | 6.92             | 10.24          | 12.36           |
| 14               | 201.81                | 2.04             | 2.51          | 0.24            | 1.95             | 4.27           | 13.69             | 3.94            | 2.85            | 6.22             | 14.32          | 15.61           |
| 17               | 119.28                | 3.08             | 3.99          | 0.51            | 2.31             | 2.44           | 12.80             | 3.64            | 3.54            | 6.83             | 13.41          | 15.05           |
| 20               | 41.10                 | 2.39             | 2.97          | 0.22            | 2.98             | 1.30           | 7.70              | 2.02            | 5.00            | 7.05             | 7.99           | 10.65           |
| 23               | 9.20                  | 2.56             | 0.42          | 0.05            | 3.82             | 0.29           | 2.26              | 0.80            | 6.90            | 8.49             | 1.65           | 8.65            |
| 26               | 5.74                  | 2.50             | 0.25          | 0.05            | 4.44             | 0.11           | 1.09              | 0.47            | 9.07            | 10.45            | 0.76           | 10.48           |
| 29               | 10.45                 | 2.23             | 0.15          | 0.04            | 4.41             | 0.14           | 1.21              | 0.39            | 10.96           | 12.06            | 0.90           | 12.09           |
| 32               | 6.02                  | 1.63             | 0.17          | 0.04            | 3.92             | 0.12           | 0.86              | 0.33            | 12.70           | 13.41            | 0.54           | 13.43           |
| 35               | 2.97                  | 1.23             | 0.15          | 0.05            | 4.11             | 0.09           | 0.92              | 0.26            | 14.55           | 15.19            | 0.56           | 15.20           |
| 38               | 1.31                  | 1.09             | 0.20          | 0.05            | 5.48             | 0.08           | 1.54              | 0.25            | 16.32           | 17.27            | 1.43           | 17.33           |
| 41               | -4.33                 | 1.17             | 0.23          | 0.05            | 8.79             | 0.07           | 2.03              | 0.26            | 17.76           | 19.86            | 1.99           | 19.96           |

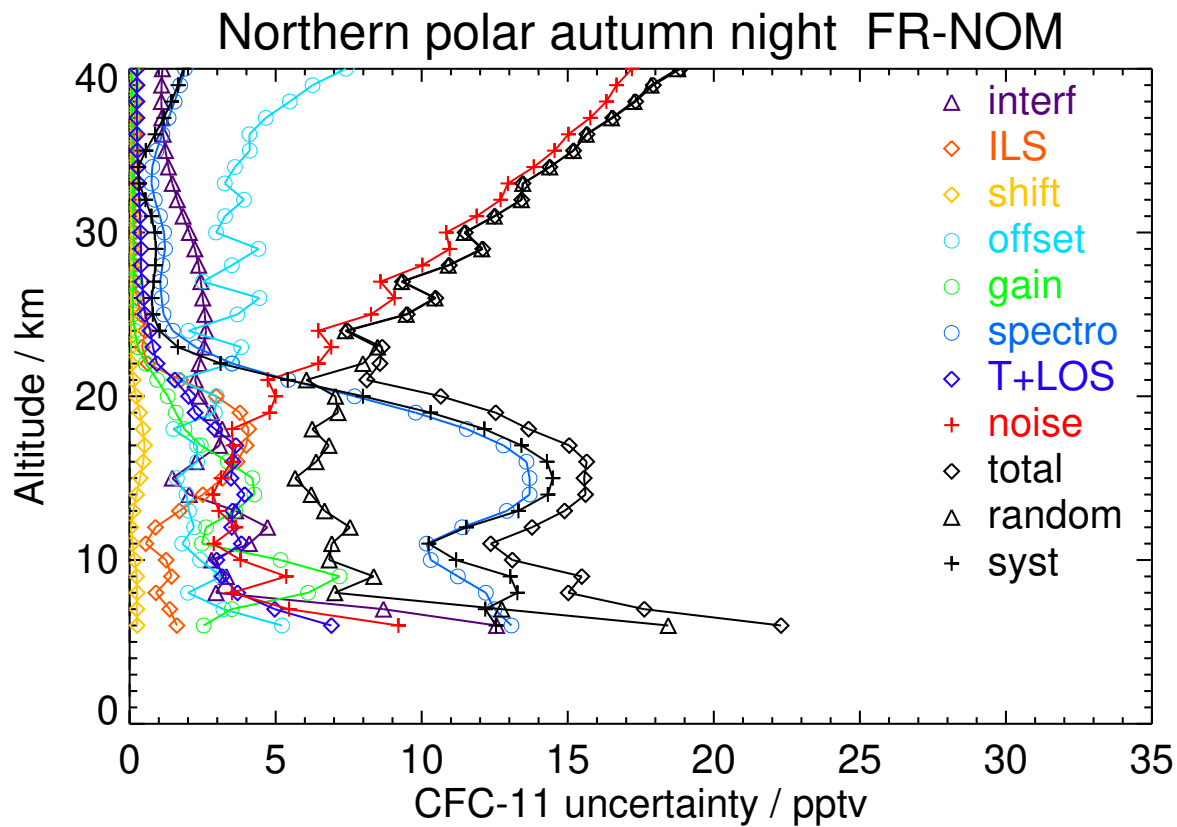

**Figure S8.** V8H\_F-11\_61 Northern polar autumn night

**Table S10.** CFC-11 error budget for Northern midlatitude winter day. All uncertainties are  $1\sigma$ .

| altitude<br>(km) | mean target<br>(pptv) | interf<br>(pptv) | ILS<br>(pptv) | shift<br>(pptv) | offset<br>(pptv) | gain<br>(pptv) | spectro<br>(pptv) | T+LOS<br>(pptv) | noise<br>(pptv) | random<br>(pptv) | syst<br>(pptv) | total<br>(pptv) |
|------------------|-----------------------|------------------|---------------|-----------------|------------------|----------------|-------------------|-----------------|-----------------|------------------|----------------|-----------------|
| 5                | 291.30                | 10.93            | 1.72          | 0.20            | 5.21             | 1.68           | 15.25             | 8.05            | 9.41            | 18.45            | 14.06          | 23.20           |
| 8                | 253.37                | 4.50             | 1.58          | 0.22            | 3.28             | 5.83           | 11.01             | 4.07            | 5.77            | 10.52            | 11.31          | 15.45           |
| 11               | 230.70                | 3.20             | 1.05          | 0.25            | 2.18             | 3.33           | 12.24             | 3.76            | 3.92            | 7.19             | 12.45          | 14.37           |
| 14               | 184.82                | 2.54             | 2.85          | 0.35            | 1.60             | 3.45           | 12.78             | 3.57            | 3.16            | 6.51             | 13.15          | 14.67           |
| 17               | 129.11                | 2.72             | 4.48          | 0.67            | 1.47             | 2.26           | 12.04             | 2.84            | 3.51            | 6.44             | 12.61          | 14.16           |
| 20               | 62.83                 | 2.57             | 2.54          | 0.22            | 1.67             | 1.31           | 8.46              | 1.83            | 4.58            | 6.81             | 8.19           | 10.65           |
| 23               | 25.64                 | 2.62             | 0.36          | 0.19            | 1.89             | 0.62           | 3.22              | 0.97            | 6.02            | 7.08             | 2.90           | 7.65            |
| 26               | 9.78                  | 2.53             | 0.26          | 0.04            | 2.01             | 0.22           | 1.62              | 0.58            | 7.68            | 8.43             | 1.18           | 8.51            |
| 29               | 10.28                 | 2.27             | 0.17          | 0.05            | 2.12             | 0.13           | 1.13              | 0.39            | 9.43            | 9.98             | 0.76           | 10.01           |
| 32               | 7.73                  | 1.70             | 0.20          | 0.05            | 2.38             | 0.09           | 0.96              | 0.32            | 11.31           | 11.71            | 0.54           | 11.73           |
| 35               | 7.04                  | 1.29             | 0.12          | 0.05            | 2.94             | 0.11           | 0.97              | 0.22            | 13.26           | 13.66            | 0.68           | 13.68           |
| 38               | 6.15                  | 1.15             | 0.21          | 0.05            | 4.10             | 0.13           | 1.63              | 0.20            | 15.03           | 15.64            | 1.49           | 15.71           |
| 41               | 5.43                  | 1.25             | 0.25          | 0.04            | 6.85             | 0.11           | 1.97              | 0.20            | 16.50           | 17.92            | 1.90           | 18.02           |

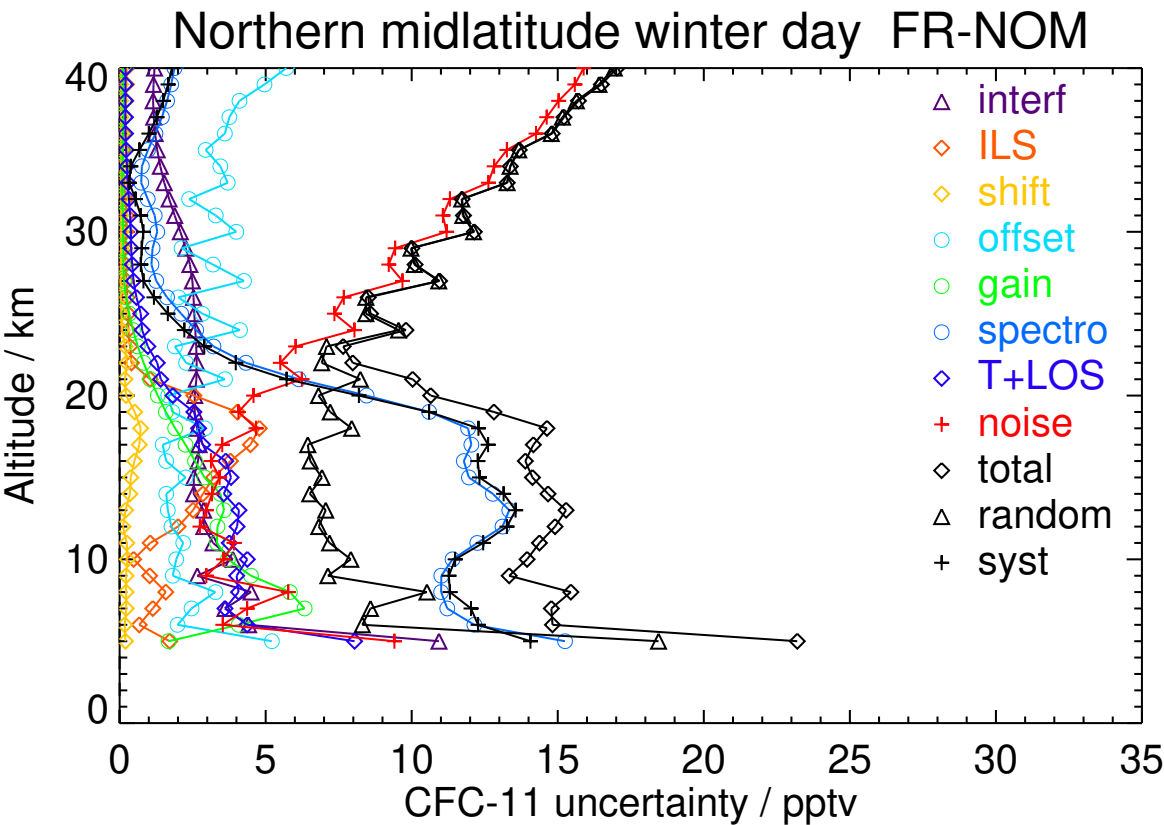

**Figure S9.** V8H\_F-11\_61 Northern midlatitude winter day

**Table S11.** CFC-11 error budget for Northern midlatitude winter night. All uncertainties are  $1\sigma$ .

| altitude<br>(km) | mean target<br>(pptv) | interf<br>(pptv) | ILS<br>(pptv) | shift<br>(pptv) | offset<br>(pptv) | gain<br>(pptv) | spectro<br>(pptv) | T+LOS<br>(pptv) | noise<br>(pptv) | random<br>(pptv) | syst<br>(pptv) | total<br>(pptv) |
|------------------|-----------------------|------------------|---------------|-----------------|------------------|----------------|-------------------|-----------------|-----------------|------------------|----------------|-----------------|
| 5                | 296.14                | 11.70            | 2.18          | 0.30            | 6.94             | 4.21           | 13.06             | 8.52            | 9.71            | 20.32            | 11.49          | 23.34           |
| 8                | 243.08                | 2.56             | 1.80          | 0.25            | 3.30             | 7.28           | 16.55             | 3.39            | 5.05            | 13.40            | 14.32          | 19.61           |
| 11               | 235.35                | 3.83             | 1.27          | 0.14            | 2.05             | 2.79           | 13.84             | 4.37            | 3.50            | 9.64             | 12.58          | 15.85           |
| 14               | 168.85                | 1.98             | 3.25          | 0.22            | 1.40             | 3.75           | 14.56             | 3.73            | 2.88            | 9.27             | 13.37          | 16.27           |
| 17               | 122.41                | 3.03             | 3.55          | 0.53            | 1.03             | 1.88           | 11.12             | 2.88            | 3.03            | 7.90             | 10.26          | 12.95           |
| 20               | 60.09                 | 2.48             | 3.07          | 0.48            | 0.95             | 1.38           | 7.70              | 1.96            | 3.84            | 5.92             | 7.84           | 9.82            |
| 23               | 26.08                 | 2.70             | 0.53          | 0.22            | 1.22             | 0.50           | 4.16              | 1.00            | 5.19            | 6.91             | 2.61           | 7.39            |
| 26               | 11.43                 | 2.51             | 0.20          | 0.07            | 1.68             | 0.24           | 1.31              | 0.58            | 6.95            | 7.66             | 1.01           | 7.72            |
| 29               | 12.99                 | 2.21             | 0.21          | 0.04            | 2.34             | 0.17           | 1.32              | 0.38            | 9.00            | 9.62             | 0.79           | 9.66            |
| 32               | 8.68                  | 1.59             | 0.22          | 0.05            | 2.84             | 0.14           | 1.16              | 0.36            | 11.21           | 11.71            | 0.86           | 11.74           |
| 35               | 6.19                  | 1.26             | 0.18          | 0.05            | 3.20             | 0.09           | 0.83              | 0.25            | 13.24           | 13.70            | 0.46           | 13.71           |
| 38               | 2.51                  | 1.11             | 0.18          | 0.05            | 3.92             | 0.11           | 1.64              | 0.20            | 15.03           | 15.60            | 1.41           | 15.66           |
| 41               | 1.11                  | 1.20             | 0.26          | 0.04            | 6.31             | 0.10           | 2.25              | 0.20            | 16.20           | 17.46            | 1.98           | 17.57           |

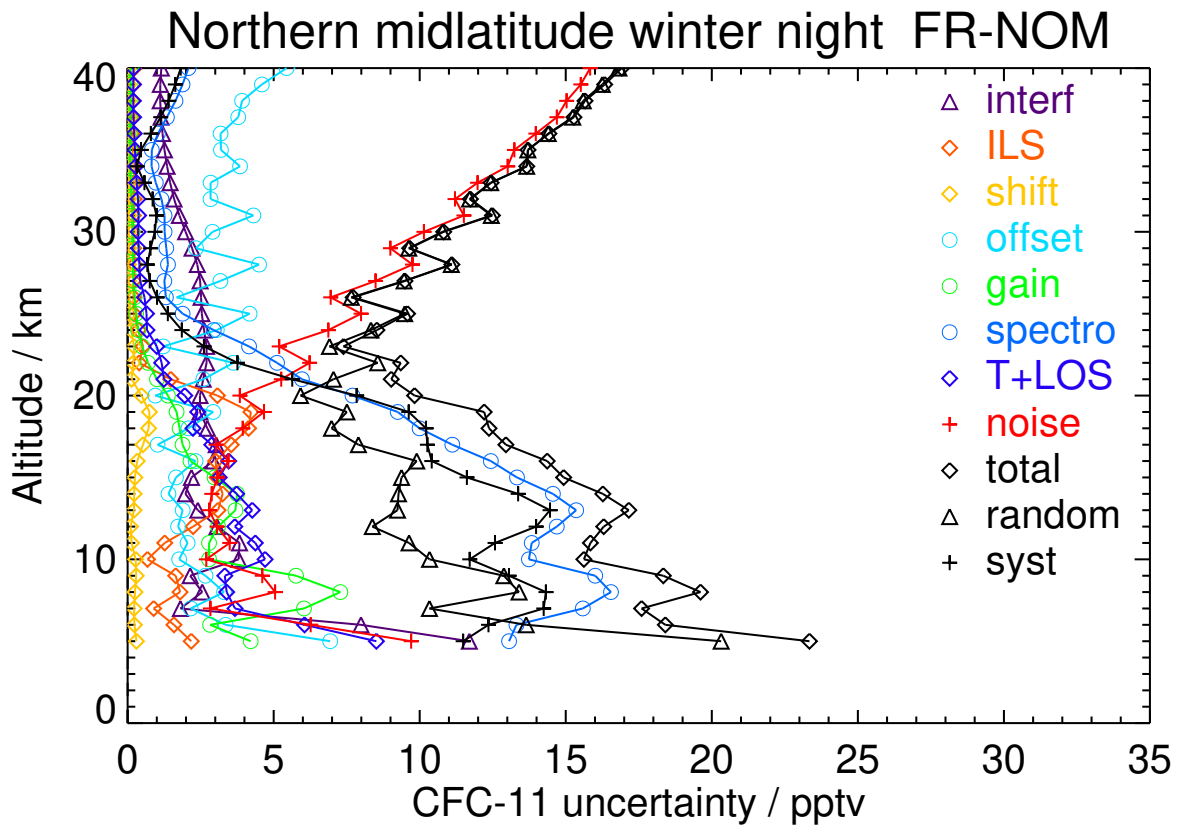**Figure S10.** V8H\_F-11\_61 Northern midlatitude winter night

**Table S12.** CFC-11 error budget for Northern midlatitude spring day. All uncertainties are  $1\sigma$ .

| altitude<br>(km) | mean target<br>(pptv) | interf<br>(pptv) | ILS<br>(pptv) | shift<br>(pptv) | offset<br>(pptv) | gain<br>(pptv) | spectro<br>(pptv) | T+LOS<br>(pptv) | noise<br>(pptv) | random<br>(pptv) | syst<br>(pptv) | total<br>(pptv) |
|------------------|-----------------------|------------------|---------------|-----------------|------------------|----------------|-------------------|-----------------|-----------------|------------------|----------------|-----------------|
| 8                | 252.49                | 4.56             | 0.64          | 0.21            | 1.93             | 4.48           | 11.64             | 3.91            | 3.23            | 8.11             | 11.85          | 14.36           |
| 11               | 221.77                | 3.49             | 0.71          | 0.07            | 1.89             | 3.52           | 10.21             | 3.55            | 2.86            | 6.72             | 10.41          | 12.40           |
| 14               | 193.44                | 2.59             | 2.86          | 0.18            | 2.19             | 3.16           | 12.40             | 3.87            | 2.94            | 6.95             | 12.60          | 14.39           |
| 17               | 145.54                | 2.82             | 4.92          | 0.74            | 2.81             | 2.19           | 13.73             | 3.27            | 3.86            | 7.39             | 14.31          | 16.11           |
| 20               | 63.68                 | 2.58             | 2.85          | 0.29            | 3.58             | 1.55           | 9.76              | 2.02            | 5.24            | 8.31             | 9.38           | 12.53           |
| 23               | 24.10                 | 2.58             | 0.36          | 0.18            | 4.31             | 0.58           | 3.26              | 0.92            | 6.89            | 8.84             | 2.54           | 9.20            |
| 26               | 13.75                 | 2.56             | 0.32          | 0.06            | 4.79             | 0.23           | 1.81              | 0.58            | 8.62            | 10.28            | 1.33           | 10.37           |
| 29               | 6.09                  | 2.29             | 0.26          | 0.07            | 4.65             | 0.15           | 1.11              | 0.41            | 9.99            | 11.29            | 0.85           | 11.32           |
| 32               | 2.54                  | 1.77             | 0.25          | 0.09            | 4.28             | 0.07           | 0.65              | 0.26            | 11.42           | 12.34            | 0.26           | 12.34           |
| 35               | 2.70                  | 1.31             | 0.15          | 0.10            | 3.87             | 0.10           | 1.11              | 0.21            | 12.88           | 13.53            | 0.90           | 13.56           |
| 38               | 4.01                  | 1.16             | 0.16          | 0.09            | 4.20             | 0.13           | 1.51              | 0.19            | 14.29           | 14.95            | 1.44           | 15.02           |
| 41               | 1.74                  | 1.30             | 0.22          | 0.06            | 5.69             | 0.13           | 1.86              | 0.20            | 15.56           | 16.64            | 1.77           | 16.73           |

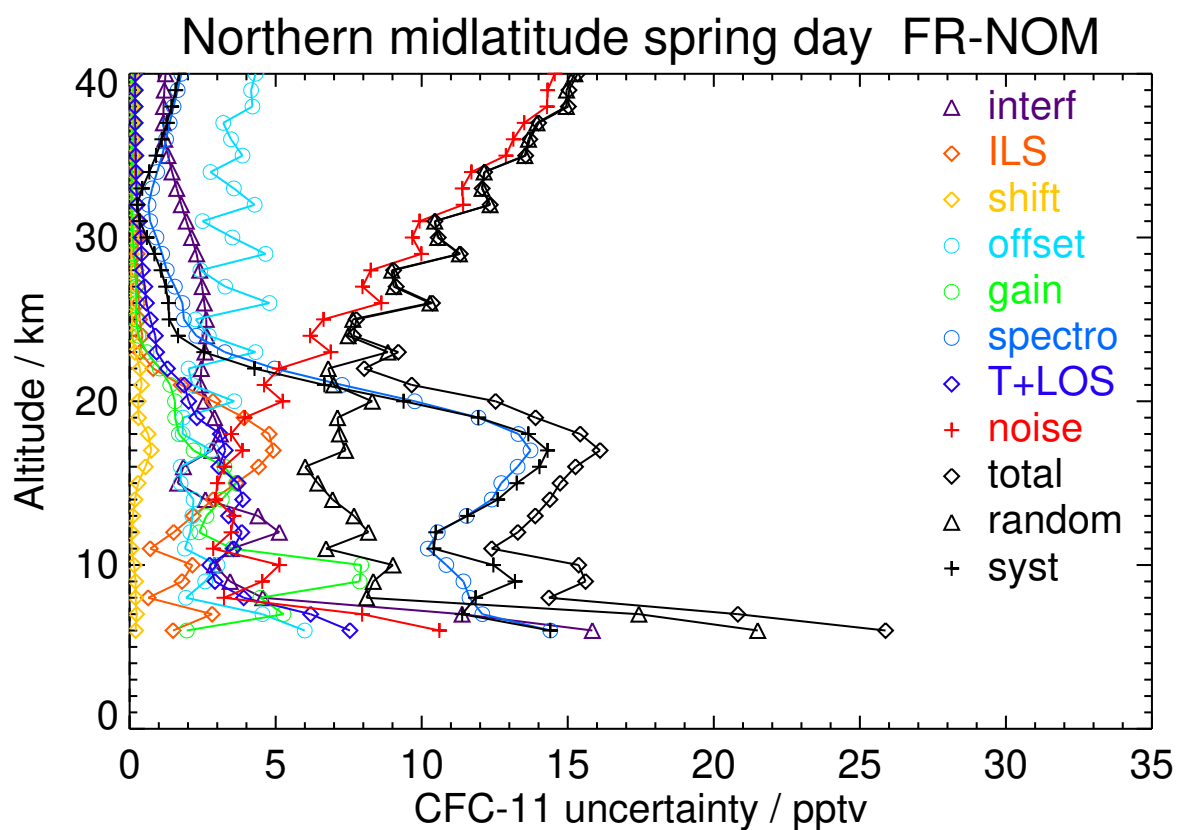**Figure S11.** V8H\_F-11\_61 Northern midlatitude spring day

**Table S13.** CFC-11 error budget for Northern midlatitude spring night. All uncertainties are  $1\sigma$ .

| altitude<br>(km) | mean target<br>(pptv) | interf<br>(pptv) | ILS<br>(pptv) | shift<br>(pptv) | offset<br>(pptv) | gain<br>(pptv) | spectro<br>(pptv) | T+LOS<br>(pptv) | noise<br>(pptv) | random<br>(pptv) | syst<br>(pptv) | total<br>(pptv) |
|------------------|-----------------------|------------------|---------------|-----------------|------------------|----------------|-------------------|-----------------|-----------------|------------------|----------------|-----------------|
| 8                | 256.61                | 6.30             | 0.81          | 0.25            | 2.32             | 3.54           | 13.32             | 4.51            | 3.83            | 9.55             | 13.40          | 16.46           |
| 11               | 210.58                | 2.78             | 0.93          | 0.09            | 1.86             | 3.51           | 10.32             | 3.10            | 2.91            | 6.33             | 10.43          | 12.20           |
| 14               | 183.12                | 2.94             | 2.64          | 0.19            | 2.00             | 2.77           | 11.97             | 3.48            | 2.86            | 7.03             | 11.90          | 13.82           |
| 17               | 129.50                | 2.59             | 4.73          | 0.78            | 2.47             | 2.03           | 12.74             | 2.85            | 3.64            | 6.95             | 13.24          | 14.95           |
| 20               | 56.72                 | 2.62             | 2.27          | 0.17            | 3.17             | 1.31           | 7.66              | 1.67            | 4.90            | 7.61             | 7.17           | 10.45           |
| 23               | 28.07                 | 2.59             | 0.33          | 0.19            | 3.86             | 0.59           | 3.21              | 0.85            | 6.49            | 8.28             | 2.60           | 8.67            |
| 26               | 12.86                 | 2.55             | 0.29          | 0.04            | 4.34             | 0.25           | 1.80              | 0.56            | 8.18            | 9.68             | 1.52           | 9.79            |
| 29               | 6.64                  | 2.29             | 0.20          | 0.04            | 4.39             | 0.14           | 0.99              | 0.36            | 9.69            | 10.92            | 0.66           | 10.94           |
| 32               | 2.54                  | 1.73             | 0.18          | 0.09            | 3.95             | 0.08           | 0.69              | 0.27            | 11.13           | 11.96            | 0.25           | 11.96           |
| 35               | 2.51                  | 1.26             | 0.12          | 0.12            | 3.50             | 0.14           | 0.98              | 0.20            | 12.64           | 13.19            | 0.77           | 13.22           |
| 38               | 3.38                  | 1.15             | 0.19          | 0.09            | 3.85             | 0.13           | 1.57              | 0.19            | 14.19           | 14.76            | 1.51           | 14.84           |
| 41               | 8.30                  | 1.27             | 0.26          | 0.07            | 5.41             | 0.13           | 2.00              | 0.18            | 15.36           | 16.34            | 1.95           | 16.46           |

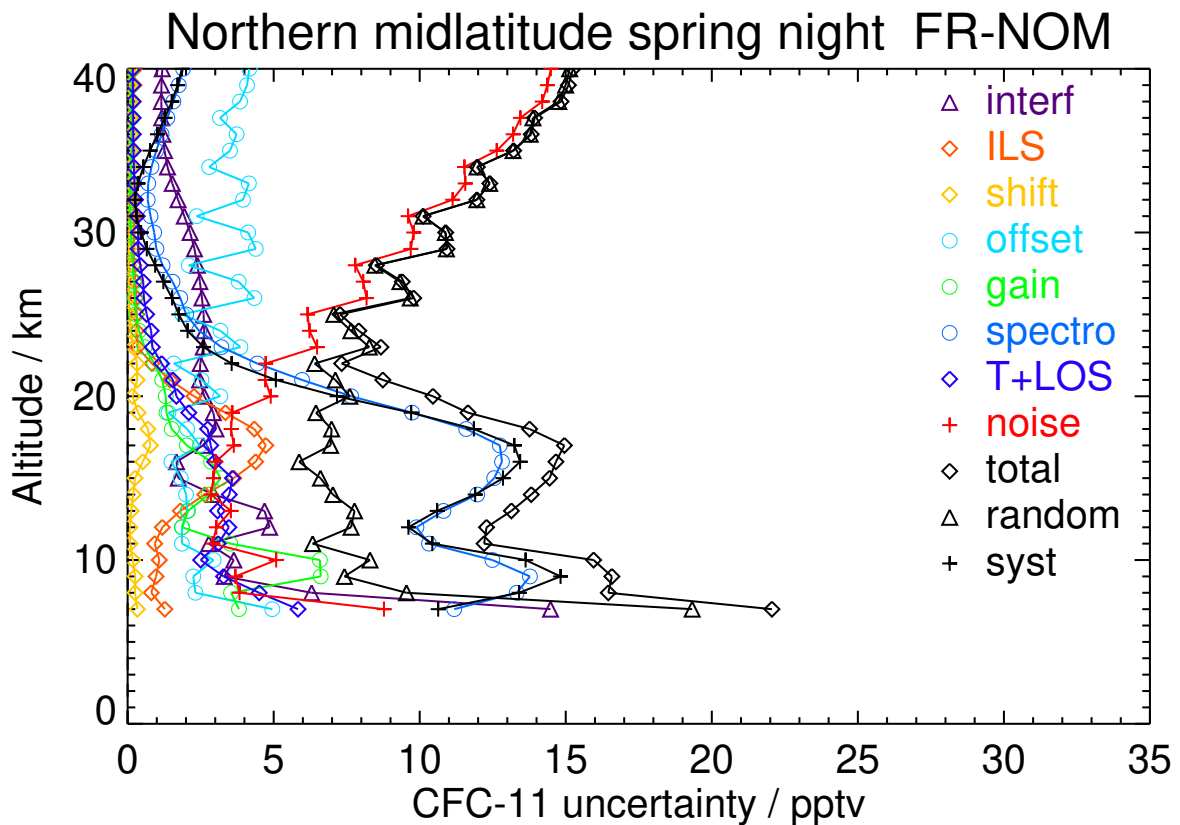**Figure S12.** V8H\_F-11\_61 Northern midlatitude spring night

**Table S14.** CFC-11 error budget for Northern midlatitude summer day. All uncertainties are  $1\sigma$ .

| altitude<br>(km) | mean target<br>(pptv) | interf<br>(pptv) | ILS<br>(pptv) | shift<br>(pptv) | offset<br>(pptv) | gain<br>(pptv) | spectro<br>(pptv) | T+LOS<br>(pptv) | noise<br>(pptv) | random<br>(pptv) | syst<br>(pptv) | total<br>(pptv) |
|------------------|-----------------------|------------------|---------------|-----------------|------------------|----------------|-------------------|-----------------|-----------------|------------------|----------------|-----------------|
| 8                | 257.37                | 10.16            | 2.05          | 0.18            | 4.26             | 3.42           | 7.80              | 4.90            | 8.54            | 15.26            | 7.89           | 17.18           |
| 11               | 253.92                | 2.09             | 1.74          | 0.11            | 2.81             | 6.78           | 11.97             | 2.83            | 5.52            | 7.80             | 13.50          | 15.59           |
| 14               | 236.95                | 3.88             | 1.70          | 0.13            | 1.96             | 2.86           | 10.76             | 3.61            | 3.78            | 7.47             | 10.83          | 13.16           |
| 17               | 211.71                | 2.02             | 5.90          | 0.74            | 1.49             | 3.29           | 16.35             | 3.68            | 3.53            | 6.14             | 17.55          | 18.60           |
| 20               | 123.68                | 2.71             | 5.07          | 0.24            | 1.41             | 1.93           | 15.45             | 3.02            | 4.15            | 6.65             | 16.12          | 17.44           |
| 23               | 42.03                 | 2.58             | 0.38          | 0.58            | 1.58             | 1.19           | 6.18              | 1.75            | 5.31            | 6.56             | 6.12           | 8.97            |
| 26               | 13.58                 | 2.57             | 0.65          | 0.07            | 1.84             | 0.24           | 2.30              | 0.89            | 6.72            | 7.58             | 2.08           | 7.86            |
| 29               | 2.70                  | 2.39             | 0.17          | 0.03            | 2.02             | 0.07           | 0.80              | 0.47            | 8.23            | 8.84             | 0.40           | 8.85            |
| 32               | 2.52                  | 1.64             | 0.17          | 0.06            | 2.15             | 0.06           | 0.54              | 0.26            | 9.78            | 10.16            | 0.25           | 10.16           |
| 35               | 1.26                  | 1.31             | 0.10          | 0.11            | 2.38             | 0.07           | 0.96              | 0.20            | 11.54           | 11.87            | 0.81           | 11.89           |
| 38               | 0.20                  | 1.17             | 0.15          | 0.09            | 2.97             | 0.07           | 1.51              | 0.18            | 13.49           | 13.87            | 1.45           | 13.95           |
| 41               | 0.67                  | 1.08             | 0.18          | 0.05            | 4.12             | 0.11           | 1.84              | 0.19            | 14.58           | 15.20            | 1.79           | 15.30           |

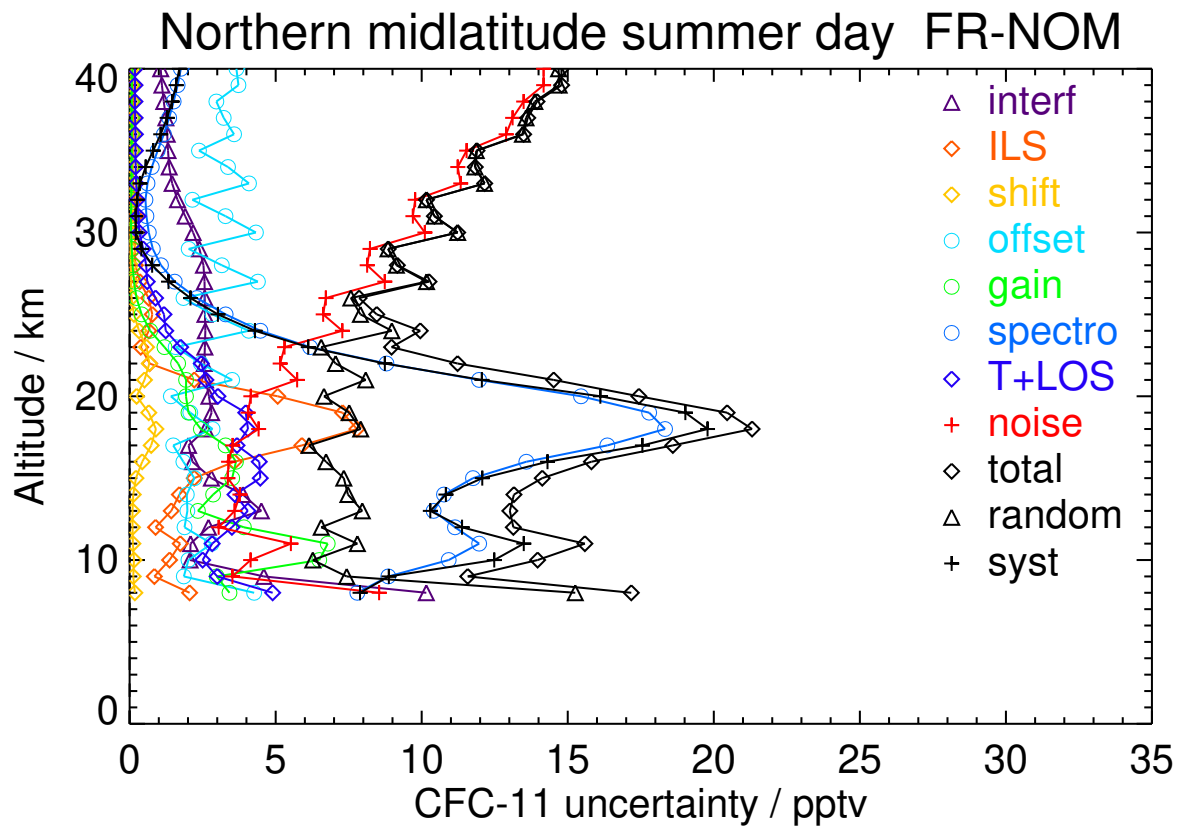

**Figure S13.** V8H\_F-11\_61 Northern midlatitude summer day

**Table S15.** CFC-11 error budget for Northern midlatitude summer night. All uncertainties are  $1\sigma$ .

| altitude<br>(km) | mean target<br>(pptv) | interf<br>(pptv) | ILS<br>(pptv) | shift<br>(pptv) | offset<br>(pptv) | gain<br>(pptv) | spectro<br>(pptv) | T+LOS<br>(pptv) | noise<br>(pptv) | random<br>(pptv) | syst<br>(pptv) | total<br>(pptv) |
|------------------|-----------------------|------------------|---------------|-----------------|------------------|----------------|-------------------|-----------------|-----------------|------------------|----------------|-----------------|
| 8                | 271.36                | 10.85            | 1.52          | 0.19            | 4.51             | 2.69           | 9.31              | 5.79            | 9.34            | 16.67            | 8.78           | 18.84           |
| 11               | 248.02                | 2.20             | 1.43          | 0.13            | 2.76             | 6.54           | 11.78             | 2.87            | 5.51            | 7.62             | 13.29          | 15.32           |
| 14               | 239.51                | 4.09             | 1.50          | 0.16            | 1.88             | 2.39           | 10.89             | 3.79            | 3.77            | 7.34             | 11.02          | 13.25           |
| 17               | 208.55                | 1.81             | 4.93          | 0.50            | 1.20             | 3.36           | 15.03             | 3.85            | 3.34            | 5.83             | 16.08          | 17.10           |
| 20               | 119.48                | 2.80             | 5.55          | 0.19            | 0.96             | 1.53           | 15.12             | 3.28            | 3.92            | 6.55             | 15.93          | 17.22           |
| 23               | 36.55                 | 2.53             | 0.31          | 0.50            | 0.97             | 1.10           | 6.06              | 1.88            | 5.06            | 6.27             | 5.95           | 8.64            |
| 26               | 11.79                 | 2.59             | 0.53          | 0.05            | 1.31             | 0.20           | 1.79              | 0.88            | 6.55            | 7.30             | 1.54           | 7.46            |
| 29               | 6.25                  | 2.37             | 0.17          | 0.03            | 1.71             | 0.09           | 0.96              | 0.46            | 8.19            | 8.74             | 0.62           | 8.76            |
| 32               | 0.41                  | 1.66             | 0.17          | 0.07            | 2.09             | 0.05           | 0.58              | 0.29            | 9.91            | 10.28            | 0.21           | 10.29           |
| 35               | 3.44                  | 1.26             | 0.11          | 0.11            | 2.56             | 0.08           | 1.01              | 0.19            | 11.72           | 12.08            | 0.85           | 12.11           |
| 38               | 5.56                  | 1.18             | 0.15          | 0.10            | 2.98             | 0.09           | 1.44              | 0.19            | 13.81           | 14.18            | 1.37           | 14.25           |
| 41               | 1.58                  | 1.10             | 0.18          | 0.07            | 4.15             | 0.12           | 1.79              | 0.19            | 14.76           | 15.38            | 1.74           | 15.48           |

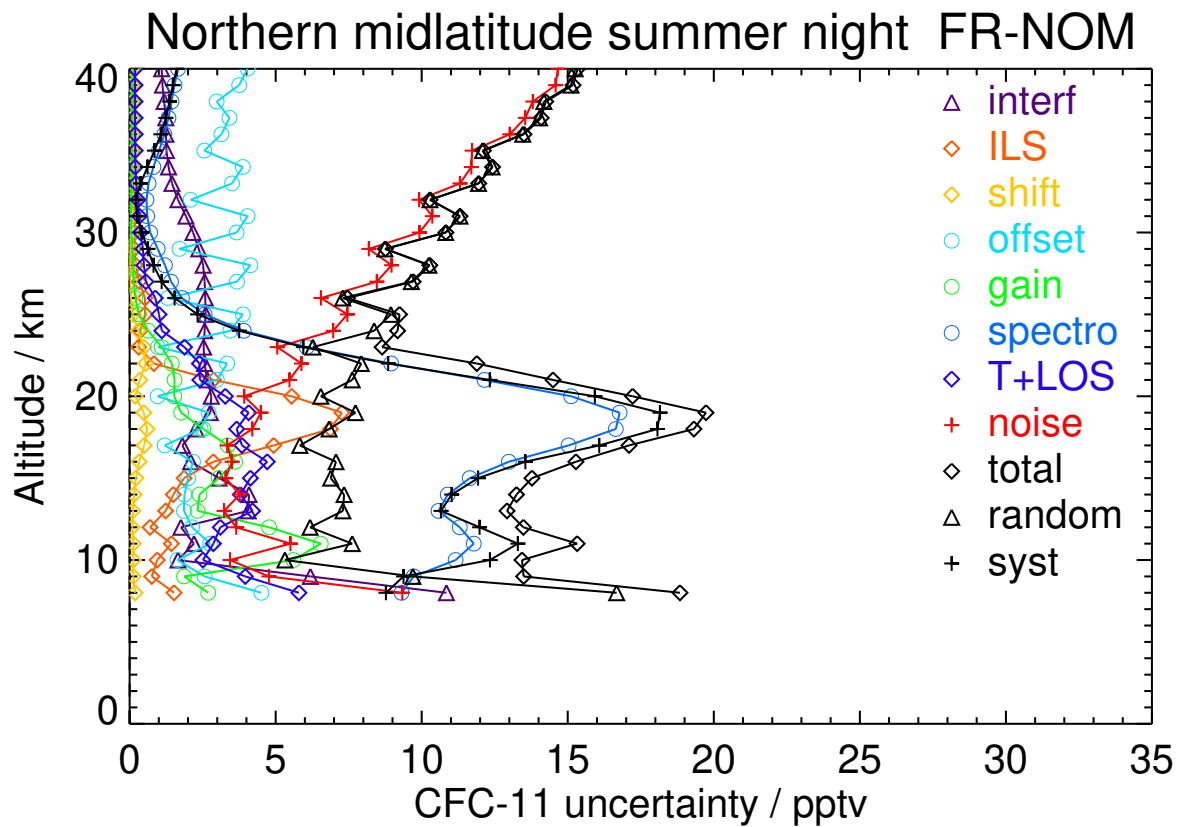

**Figure S14.** V8H\_F-11\_61 Northern midlatitude summer night

**Table S16.** CFC-11 error budget for Northern midlatitude autumn day. All uncertainties are  $1\sigma$ .

| altitude<br>(km) | mean target<br>(pptv) | interf<br>(pptv) | ILS<br>(pptv) | shift<br>(pptv) | offset<br>(pptv) | gain<br>(pptv) | spectro<br>(pptv) | T+LOS<br>(pptv) | noise<br>(pptv) | random<br>(pptv) | syst<br>(pptv) | total<br>(pptv) |
|------------------|-----------------------|------------------|---------------|-----------------|------------------|----------------|-------------------|-----------------|-----------------|------------------|----------------|-----------------|
| 8                | 275.27                | 8.86             | 6.06          | 0.13            | 3.38             | 3.96           | 13.46             | 4.76            | 5.83            | 14.57            | 12.96          | 19.50           |
| 11               | 242.67                | 2.42             | 1.68          | 0.09            | 2.27             | 5.17           | 10.76             | 2.59            | 4.14            | 6.85             | 11.54          | 13.42           |
| 14               | 245.20                | 4.49             | 2.18          | 0.19            | 1.91             | 2.53           | 12.12             | 4.17            | 3.47            | 7.99             | 12.14          | 14.53           |
| 17               | 188.66                | 1.99             | 5.60          | 0.56            | 1.62             | 3.30           | 17.76             | 4.67            | 3.38            | 6.96             | 18.69          | 19.94           |
| 20               | 85.81                 | 2.79             | 6.00          | 0.25            | 1.77             | 1.32           | 14.08             | 3.35            | 4.16            | 7.79             | 14.65          | 16.59           |
| 23               | 24.53                 | 2.49             | 0.68          | 0.22            | 2.12             | 0.70           | 4.61              | 1.53            | 5.51            | 7.19             | 3.73           | 8.11            |
| 26               | 11.21                 | 2.61             | 0.40          | 0.05            | 2.53             | 0.18           | 1.78              | 0.70            | 7.12            | 8.10             | 1.45           | 8.23            |
| 29               | 5.66                  | 2.26             | 0.17          | 0.04            | 2.87             | 0.09           | 0.88              | 0.41            | 8.86            | 9.63             | 0.46           | 9.64            |
| 32               | 9.43                  | 1.73             | 0.20          | 0.06            | 3.02             | 0.07           | 0.79              | 0.30            | 10.68           | 11.26            | 0.37           | 11.26           |
| 35               | 3.50                  | 1.23             | 0.12          | 0.07            | 3.23             | 0.06           | 0.86              | 0.24            | 12.53           | 13.02            | 0.59           | 13.03           |
| 38               | 4.19                  | 1.05             | 0.18          | 0.07            | 3.70             | 0.10           | 1.48              | 0.18            | 14.42           | 14.93            | 1.42           | 15.00           |
| 41               | 2.79                  | 1.17             | 0.23          | 0.05            | 5.50             | 0.09           | 1.92              | 0.20            | 15.62           | 16.60            | 1.88           | 16.71           |

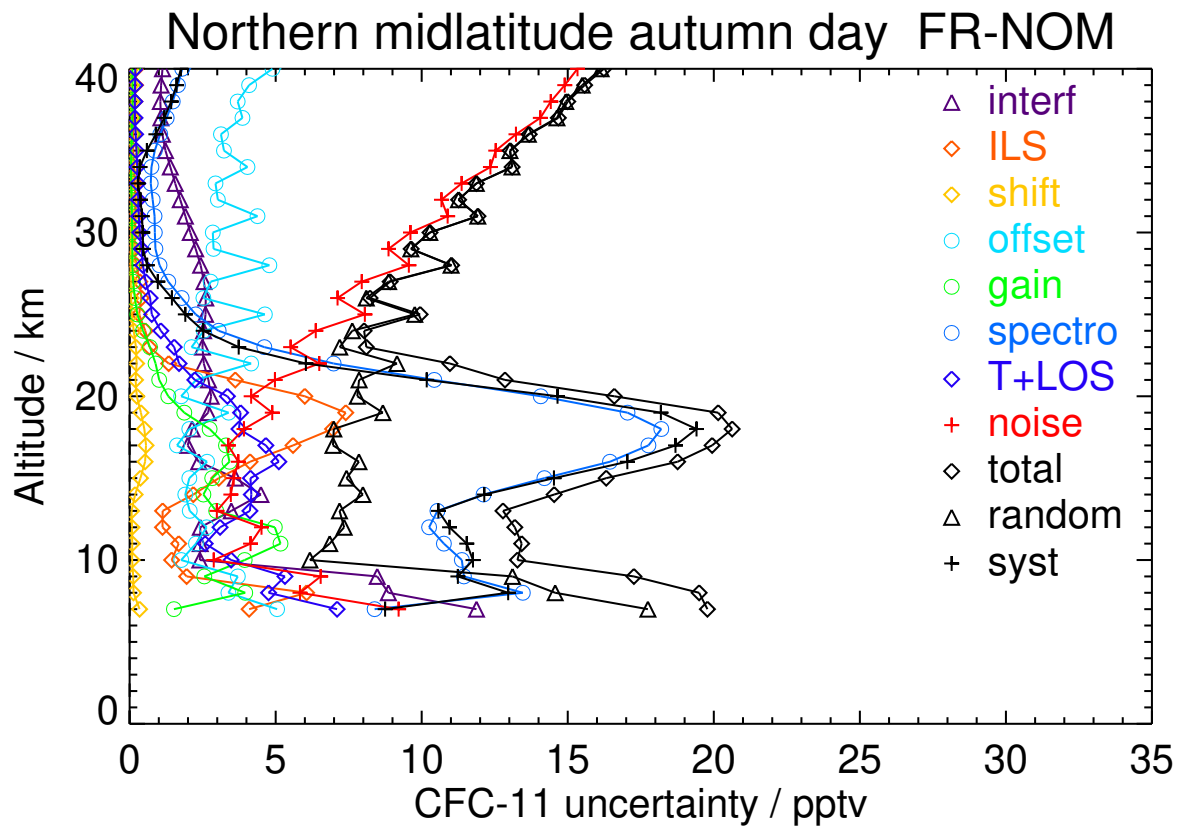

**Figure S15.** V8H\_F-11\_61 Northern midlatitude autumn day

**Table S17.** CFC-11 error budget for Northern midlatitude autumn night. All uncertainties are  $1\sigma$ .

| altitude<br>(km) | mean target<br>(pptv) | interf<br>(pptv) | ILS<br>(pptv) | shift<br>(pptv) | offset<br>(pptv) | gain<br>(pptv) | spectro<br>(pptv) | T+LOS<br>(pptv) | noise<br>(pptv) | random<br>(pptv) | syst<br>(pptv) | total<br>(pptv) |
|------------------|-----------------------|------------------|---------------|-----------------|------------------|----------------|-------------------|-----------------|-----------------|------------------|----------------|-----------------|
| 8                | 255.18                | 3.26             | 1.48          | 0.21            | 1.90             | 6.44           | 13.15             | 3.30            | 3.47            | 7.68             | 13.95          | 15.93           |
| 11               | 243.21                | 3.00             | 0.85          | 0.14            | 1.86             | 4.39           | 10.73             | 3.28            | 3.18            | 6.70             | 11.12          | 12.98           |
| 14               | 231.02                | 3.18             | 1.91          | 0.18            | 1.85             | 3.31           | 12.44             | 3.79            | 2.96            | 6.70             | 12.69          | 14.35           |
| 17               | 173.00                | 2.52             | 4.69          | 0.54            | 2.06             | 2.94           | 14.77             | 4.17            | 3.44            | 7.09             | 15.44          | 16.99           |
| 20               | 82.79                 | 2.60             | 4.86          | 0.23            | 2.45             | 1.62           | 11.93             | 2.84            | 4.57            | 7.48             | 12.42          | 14.50           |
| 23               | 27.53                 | 2.57             | 0.50          | 0.16            | 3.05             | 0.72           | 5.02              | 1.38            | 6.09            | 7.93             | 4.24           | 8.99            |
| 26               | 8.73                  | 2.56             | 0.31          | 0.05            | 3.60             | 0.24           | 1.97              | 0.69            | 7.81            | 9.13             | 1.32           | 9.22            |
| 29               | 6.16                  | 2.29             | 0.13          | 0.04            | 3.94             | 0.10           | 0.84              | 0.36            | 9.61            | 10.66            | 0.55           | 10.68           |
| 32               | 6.21                  | 1.68             | 0.17          | 0.06            | 3.73             | 0.06           | 0.67              | 0.27            | 11.26           | 12.00            | 0.27           | 12.01           |
| 35               | 7.92                  | 1.22             | 0.13          | 0.06            | 3.74             | 0.08           | 0.93              | 0.20            | 12.94           | 13.54            | 0.68           | 13.56           |
| 38               | 9.13                  | 1.08             | 0.18          | 0.06            | 4.00             | 0.11           | 1.47              | 0.19            | 14.76           | 15.35            | 1.28           | 15.40           |
| 41               | 6.13                  | 1.18             | 0.23          | 0.05            | 5.83             | 0.08           | 1.88              | 0.20            | 15.85           | 16.95            | 1.77           | 17.04           |

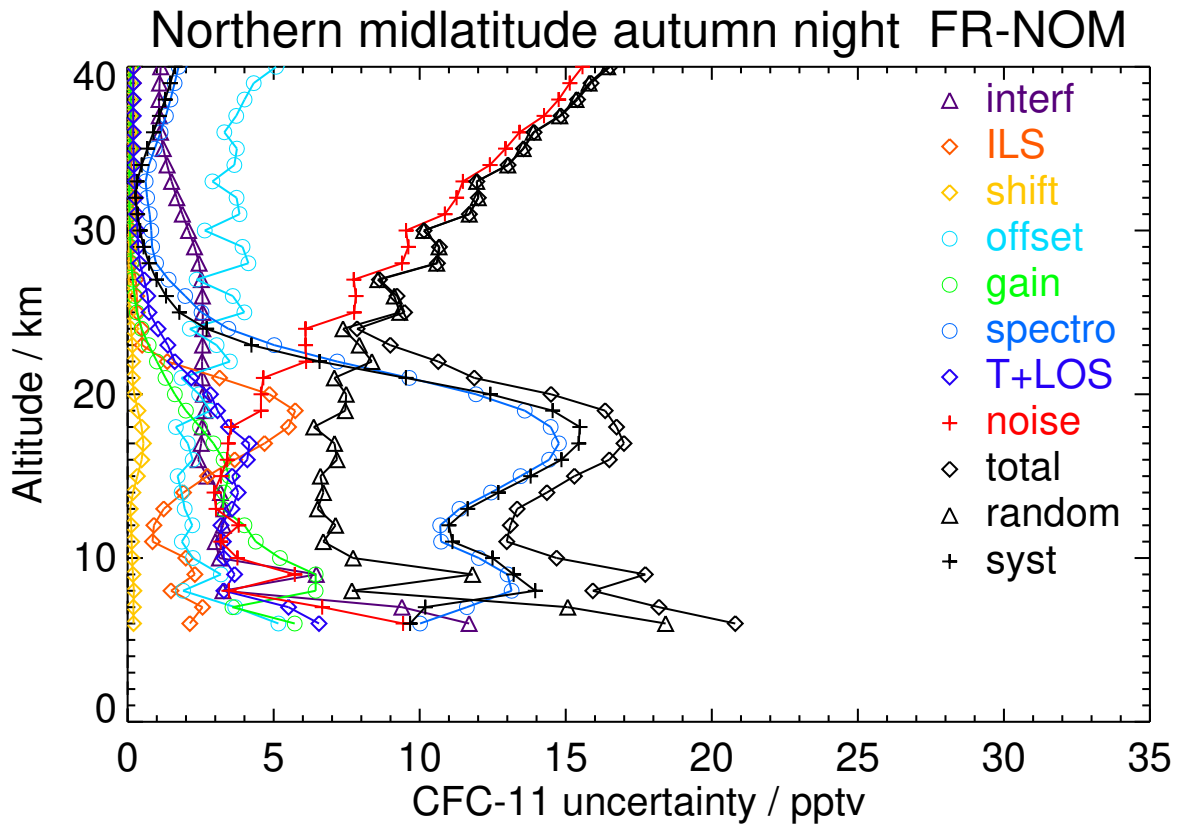**Figure S16.** V8H\_F-11\_61 Northern midlatitude autumn night

**Table S18.** CFC-11 error budget for Tropics day. All uncertainties are  $1\sigma$ .

| altitude<br>(km) | mean target<br>(pptv) | interf<br>(pptv) | ILS<br>(pptv) | shift<br>(pptv) | offset<br>(pptv) | gain<br>(pptv) | spectro<br>(pptv) | T+LOS<br>(pptv) | noise<br>(pptv) | random<br>(pptv) | syst<br>(pptv) | total<br>(pptv) |
|------------------|-----------------------|------------------|---------------|-----------------|------------------|----------------|-------------------|-----------------|-----------------|------------------|----------------|-----------------|
| 8                | 266.24                | 7.36             | 2.80          | 0.30            | 2.77             | 4.66           | 10.28             | 4.32            | 5.15            | 11.69            | 10.29          | 15.57           |
| 11               | 255.57                | 3.52             | 1.56          | 0.20            | 2.30             | 5.20           | 9.10              | 3.01            | 3.90            | 7.64             | 9.79           | 12.42           |
| 14               | 262.87                | 2.66             | 1.50          | 0.43            | 2.53             | 4.67           | 9.63              | 4.33            | 3.76            | 7.36             | 10.45          | 12.78           |
| 17               | 251.59                | 2.94             | 7.52          | 0.30            | 3.18             | 2.62           | 16.55             | 5.26            | 5.00            | 9.21             | 18.00          | 20.22           |
| 20               | 190.73                | 2.36             | 4.58          | 0.56            | 3.41             | 2.15           | 15.73             | 3.90            | 5.77            | 8.60             | 16.28          | 18.41           |
| 23               | 131.08                | 2.60             | 1.58          | 0.76            | 3.91             | 1.60           | 11.78             | 2.88            | 6.92            | 9.05             | 11.86          | 14.92           |
| 26               | 62.44                 | 2.61             | 2.03          | 0.31            | 4.32             | 0.85           | 8.54              | 1.90            | 8.28            | 10.03            | 8.66           | 13.25           |
| 29               | 12.24                 | 2.51             | 0.87          | 0.09            | 4.38             | 0.22           | 2.67              | 0.85            | 9.62            | 10.96            | 2.55           | 11.26           |
| 32               | 5.00                  | 1.77             | 0.32          | 0.09            | 4.20             | 0.07           | 0.77              | 0.36            | 10.94           | 11.88            | 0.34           | 11.89           |
| 35               | 3.04                  | 1.30             | 0.13          | 0.11            | 3.69             | 0.12           | 0.98              | 0.24            | 12.47           | 13.09            | 0.84           | 13.11           |
| 38               | 4.40                  | 1.17             | 0.13          | 0.09            | 3.96             | 0.10           | 1.46              | 0.24            | 13.90           | 14.51            | 1.36           | 14.57           |
| 41               | 2.37                  | 1.18             | 0.14          | 0.07            | 5.59             | 0.12           | 1.77              | 0.28            | 15.22           | 16.27            | 1.70           | 16.36           |

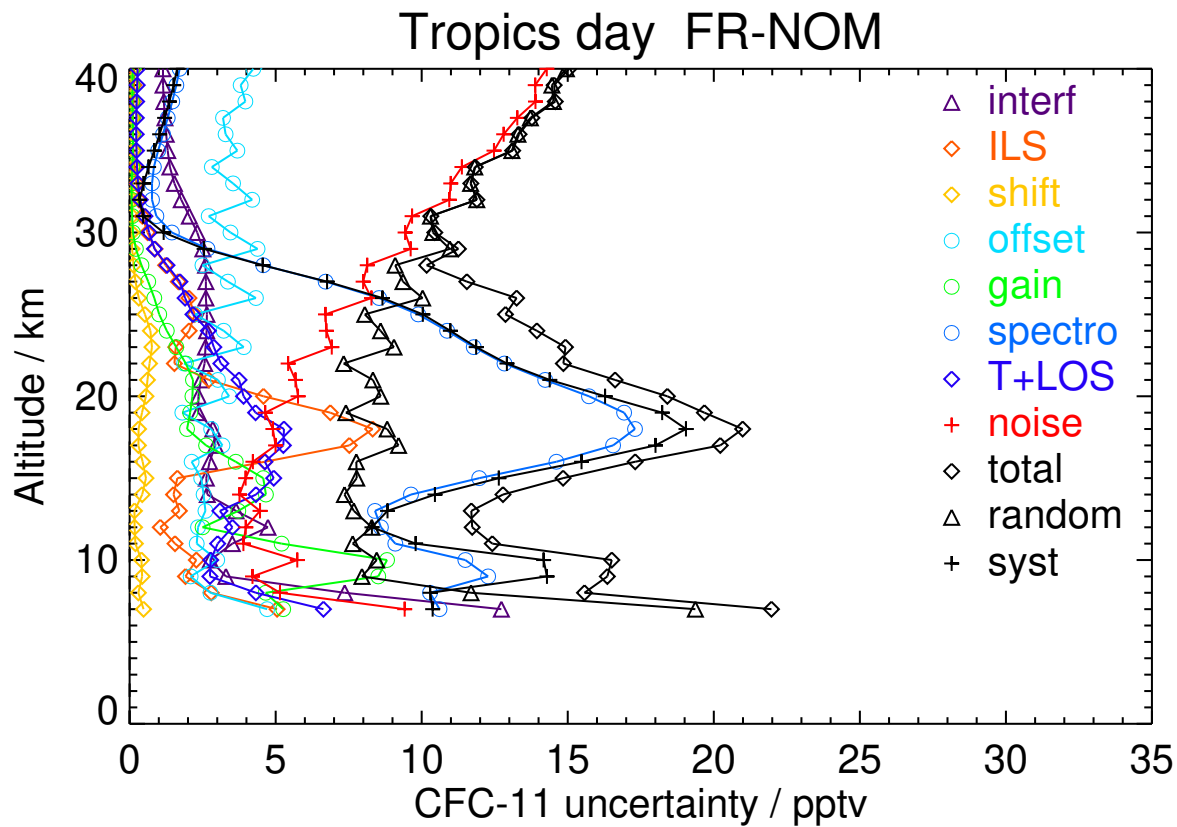

**Figure S17.** V8H\_F-11\_61 Tropics day

**Table S19.** CFC-11 error budget for Tropics night. All uncertainties are  $1\sigma$ .

| altitude<br>(km) | mean target<br>(pptv) | interf<br>(pptv) | ILS<br>(pptv) | shift<br>(pptv) | offset<br>(pptv) | gain<br>(pptv) | spectro<br>(pptv) | T+LOS<br>(pptv) | noise<br>(pptv) | random<br>(pptv) | syst<br>(pptv) | total<br>(pptv) |
|------------------|-----------------------|------------------|---------------|-----------------|------------------|----------------|-------------------|-----------------|-----------------|------------------|----------------|-----------------|
| 8                | 257.23                | 3.55             | 1.44          | 0.26            | 1.70             | 4.01           | 10.22             | 2.88            | 2.93            | 6.41             | 10.68          | 12.45           |
| 11               | 254.75                | 3.62             | 1.99          | 0.20            | 1.88             | 3.03           | 11.07             | 3.13            | 2.96            | 7.43             | 10.76          | 13.07           |
| 14               | 264.96                | 2.73             | 1.71          | 0.49            | 2.54             | 4.62           | 9.45              | 4.66            | 3.57            | 7.40             | 10.36          | 12.73           |
| 17               | 248.49                | 2.88             | 8.17          | 0.21            | 3.50             | 1.97           | 16.47             | 5.18            | 5.20            | 8.97             | 18.33          | 20.40           |
| 20               | 208.01                | 2.34             | 2.87          | 0.49            | 3.93             | 2.37           | 15.70             | 4.09            | 6.15            | 8.92             | 16.02          | 18.34           |
| 23               | 138.65                | 2.64             | 2.30          | 1.10            | 4.37             | 1.72           | 12.91             | 3.26            | 7.24            | 9.67             | 13.10          | 16.28           |
| 26               | 67.25                 | 2.56             | 2.05          | 0.29            | 4.75             | 0.81           | 8.62              | 1.99            | 8.51            | 10.36            | 8.79           | 13.59           |
| 29               | 15.12                 | 2.49             | 0.94          | 0.08            | 4.78             | 0.17           | 2.90              | 0.88            | 9.80            | 11.27            | 2.87           | 11.63           |
| 32               | 3.23                  | 1.71             | 0.18          | 0.11            | 4.43             | 0.06           | 0.71              | 0.33            | 11.11           | 12.10            | 0.36           | 12.11           |
| 35               | 2.82                  | 1.29             | 0.14          | 0.11            | 3.90             | 0.09           | 1.26              | 0.21            | 12.60           | 13.27            | 1.10           | 13.31           |
| 38               | 9.77                  | 1.15             | 0.12          | 0.09            | 3.97             | 0.10           | 1.44              | 0.20            | 13.98           | 14.59            | 1.34           | 14.65           |
| 41               | 6.92                  | 1.14             | 0.13          | 0.08            | 5.28             | 0.13           | 1.62              | 0.25            | 15.11           | 16.06            | 1.51           | 16.13           |

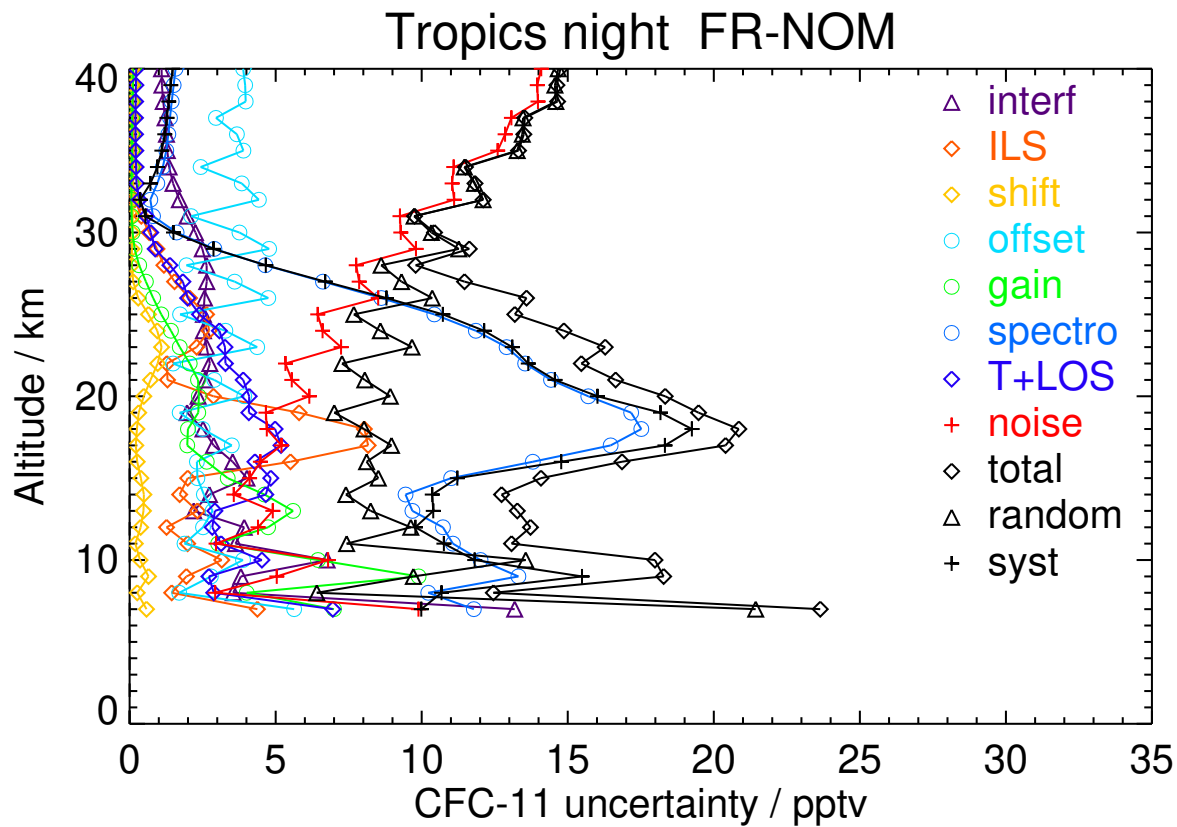

**Figure S18.** V8H\_F-11\_61 Tropics night

**Table S20.** CFC-11 error budget for Southern midlatitude winter day. All uncertainties are  $1\sigma$ .

| altitude<br>(km) | mean target<br>(pptv) | interf<br>(pptv) | ILS<br>(pptv) | shift<br>(pptv) | offset<br>(pptv) | gain<br>(pptv) | spectro<br>(pptv) | T+LOS<br>(pptv) | noise<br>(pptv) | random<br>(pptv) | syst<br>(pptv) | total<br>(pptv) |
|------------------|-----------------------|------------------|---------------|-----------------|------------------|----------------|-------------------|-----------------|-----------------|------------------|----------------|-----------------|
| 5                | 282.88                | 11.68            | 2.07          | 0.23            | 5.16             | 3.60           | 9.75              | 8.99            | 9.89            | 19.68            | 8.17           | 21.31           |
| 8                | 240.08                | 2.44             | 1.61          | 0.88            | 2.59             | 7.23           | 12.80             | 3.06            | 4.66            | 7.96             | 14.14          | 16.22           |
| 11               | 240.33                | 4.43             | 0.84          | 0.40            | 1.99             | 2.55           | 11.00             | 4.45            | 3.56            | 8.26             | 10.77          | 13.58           |
| 14               | 197.92                | 2.17             | 2.71          | 0.28            | 1.61             | 3.93           | 14.22             | 3.99            | 2.97            | 6.62             | 14.61          | 16.04           |
| 17               | 147.12                | 2.98             | 3.54          | 0.41            | 1.56             | 2.30           | 12.78             | 3.60            | 3.36            | 6.89             | 13.02          | 14.73           |
| 20               | 69.40                 | 2.42             | 3.57          | 0.24            | 1.83             | 1.73           | 10.38             | 2.51            | 4.58            | 6.89             | 10.61          | 12.65           |
| 23               | 30.34                 | 2.60             | 0.37          | 0.12            | 2.42             | 0.57           | 3.90              | 1.20            | 6.43            | 7.64             | 3.55           | 8.43            |
| 26               | 9.65                  | 2.56             | 0.24          | 0.06            | 3.06             | 0.32           | 2.52              | 0.73            | 8.74            | 9.70             | 2.30           | 9.97            |
| 29               | 4.07                  | 2.30             | 0.17          | 0.05            | 3.22             | 0.11           | 1.04              | 0.43            | 10.84           | 11.57            | 0.74           | 11.60           |
| 32               | 7.04                  | 1.67             | 0.16          | 0.07            | 3.23             | 0.08           | 0.76              | 0.31            | 12.82           | 13.35            | 0.28           | 13.36           |
| 35               | -0.02                 | 1.27             | 0.15          | 0.07            | 3.83             | 0.10           | 0.91              | 0.27            | 14.72           | 15.28            | 0.67           | 15.29           |
| 38               | -2.63                 | 1.24             | 0.18          | 0.07            | 5.22             | 0.19           | 1.68              | 0.27            | 16.28           | 17.16            | 1.60           | 17.23           |
| 41               | -1.83                 | 1.43             | 0.24          | 0.08            | 8.18             | 0.34           | 2.34              | 0.35            | 17.46           | 19.35            | 2.24           | 19.48           |

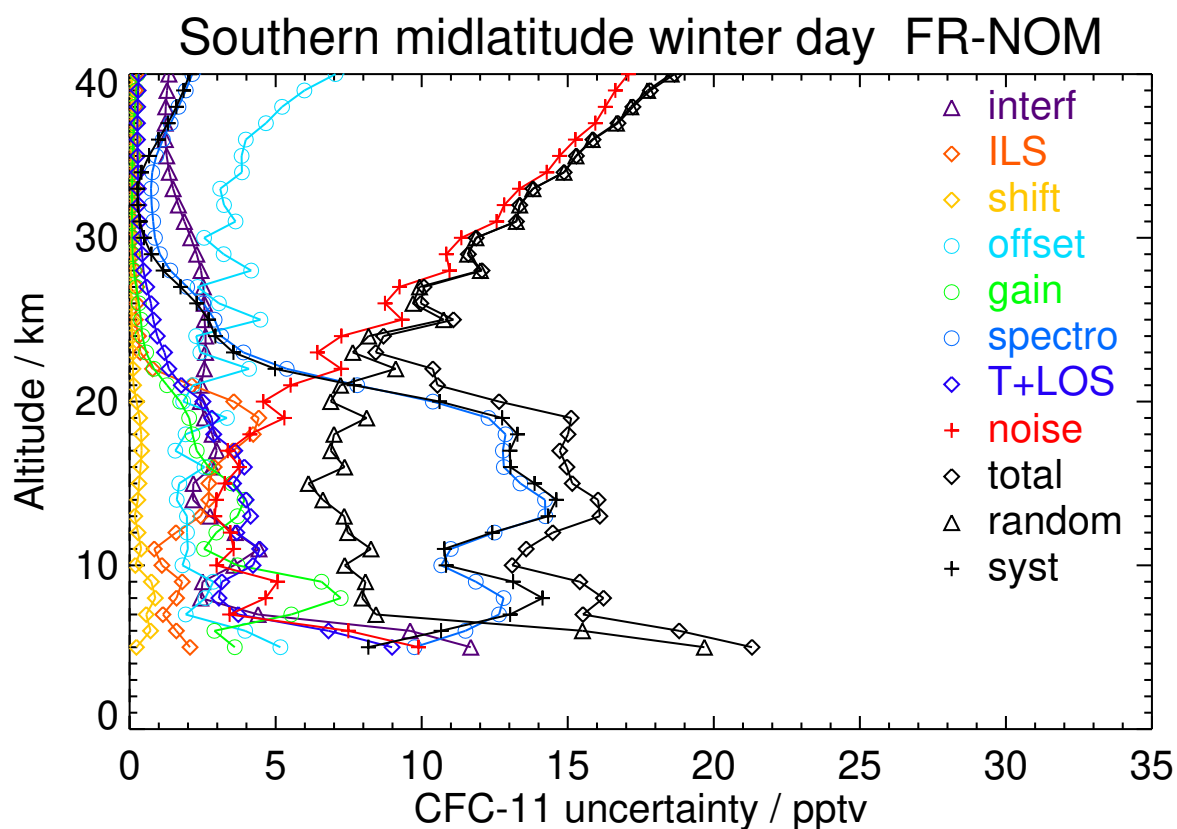**Figure S19.** V8H\_F-11\_61 Southern midlatitude winter day

**Table S21.** CFC-11 error budget for Southern midlatitude winter night. All uncertainties are  $1\sigma$ .

| altitude<br>(km) | mean target<br>(pptv) | interf<br>(pptv) | ILS<br>(pptv) | shift<br>(pptv) | offset<br>(pptv) | gain<br>(pptv) | spectro<br>(pptv) | T+LOS<br>(pptv) | noise<br>(pptv) | random<br>(pptv) | syst<br>(pptv) | total<br>(pptv) |
|------------------|-----------------------|------------------|---------------|-----------------|------------------|----------------|-------------------|-----------------|-----------------|------------------|----------------|-----------------|
| 5                | 290.82                | 11.36            | 1.93          | 0.17            | 4.52             | 2.01           | 13.39             | 8.36            | 8.91            | 18.59            | 11.83          | 22.04           |
| 8                | 240.42                | 2.90             | 1.62          | 0.16            | 2.74             | 6.49           | 10.16             | 3.24            | 5.45            | 8.85             | 11.22          | 14.29           |
| 11               | 242.89                | 4.45             | 0.90          | 0.11            | 2.18             | 2.80           | 10.49             | 4.51            | 4.01            | 8.75             | 10.15          | 13.41           |
| 14               | 203.99                | 1.90             | 2.36          | 0.29            | 1.67             | 3.96           | 13.27             | 3.98            | 3.23            | 6.96             | 13.48          | 15.17           |
| 17               | 150.16                | 2.92             | 4.07          | 0.49            | 1.61             | 2.25           | 12.91             | 3.67            | 3.57            | 6.79             | 13.41          | 15.03           |
| 20               | 66.70                 | 2.35             | 3.94          | 0.31            | 1.85             | 1.54           | 10.64             | 2.55            | 4.76            | 7.47             | 10.66          | 13.01           |
| 23               | 24.84                 | 2.58             | 0.41          | 0.18            | 2.27             | 0.46           | 3.56              | 1.18            | 6.46            | 7.64             | 3.10           | 8.25            |
| 26               | 6.43                  | 2.55             | 0.29          | 0.06            | 2.86             | 0.25           | 1.93              | 0.63            | 8.53            | 9.44             | 1.64           | 9.58            |
| 29               | 6.66                  | 2.30             | 0.16          | 0.05            | 3.30             | 0.11           | 1.16              | 0.41            | 10.54           | 11.32            | 0.79           | 11.35           |
| 32               | 3.84                  | 1.72             | 0.16          | 0.06            | 3.49             | 0.07           | 0.70              | 0.28            | 12.45           | 13.07            | 0.27           | 13.07           |
| 35               | 5.78                  | 1.33             | 0.14          | 0.07            | 3.87             | 0.08           | 1.01              | 0.21            | 14.38           | 14.97            | 0.86           | 14.99           |
| 38               | 8.38                  | 1.21             | 0.19          | 0.06            | 4.98             | 0.10           | 1.55              | 0.21            | 15.93           | 16.75            | 1.46           | 16.81           |
| 41               | 5.02                  | 1.31             | 0.26          | 0.06            | 7.67             | 0.11           | 1.92              | 0.23            | 17.07           | 18.77            | 1.84           | 18.86           |

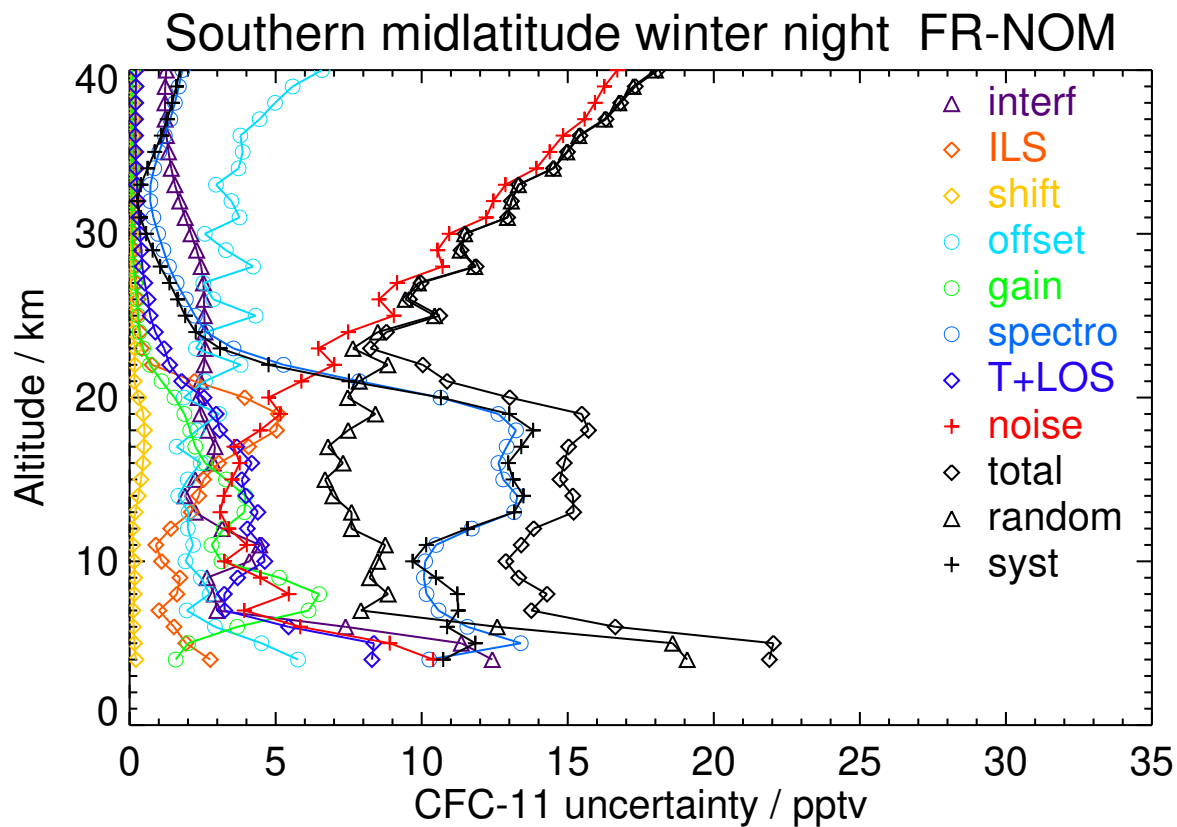

**Figure S20.** V8H\_F-11\_61 Southern midlatitude winter night

**Table S22.** CFC-11 error budget for Southern midlatitude spring day. All uncertainties are  $1\sigma$ .

| altitude<br>(km) | mean target<br>(pptv) | interf<br>(pptv) | ILS<br>(pptv) | shift<br>(pptv) | offset<br>(pptv) | gain<br>(pptv) | spectro<br>(pptv) | T+LOS<br>(pptv) | noise<br>(pptv) | random<br>(pptv) | syst<br>(pptv) | total<br>(pptv) |
|------------------|-----------------------|------------------|---------------|-----------------|------------------|----------------|-------------------|-----------------|-----------------|------------------|----------------|-----------------|
| 8                | 249.24                | 2.95             | 1.30          | 0.19            | 1.93             | 6.59           | 12.90             | 3.34            | 3.54            | 7.34             | 13.92          | 15.74           |
| 11               | 229.95                | 4.49             | 1.21          | 0.11            | 1.86             | 2.47           | 11.60             | 4.52            | 3.08            | 8.16             | 11.36          | 13.99           |
| 14               | 185.07                | 2.02             | 4.88          | 0.30            | 1.93             | 3.26           | 14.88             | 4.30            | 2.95            | 8.79             | 14.62          | 17.06           |
| 17               | 119.98                | 3.08             | 4.89          | 0.44            | 2.24             | 1.80           | 12.97             | 3.40            | 3.54            | 8.42             | 12.77          | 15.30           |
| 20               | 51.27                 | 2.39             | 3.49          | 0.46            | 2.72             | 1.11           | 7.92              | 2.02            | 4.67            | 7.87             | 7.30           | 10.73           |
| 23               | 27.88                 | 2.69             | 0.40          | 0.18            | 3.38             | 0.45           | 2.98              | 0.94            | 6.16            | 7.79             | 2.46           | 8.17            |
| 26               | 12.05                 | 2.59             | 0.31          | 0.06            | 3.90             | 0.27           | 1.71              | 0.62            | 7.68            | 9.08             | 1.38           | 9.18            |
| 29               | 9.64                  | 2.41             | 0.22          | 0.05            | 4.19             | 0.12           | 0.98              | 0.40            | 9.21            | 10.45            | 0.59           | 10.46           |
| 32               | 2.25                  | 1.75             | 0.21          | 0.08            | 4.21             | 0.07           | 0.56              | 0.28            | 10.85           | 11.79            | 0.27           | 11.79           |
| 35               | 4.94                  | 1.33             | 0.15          | 0.10            | 4.10             | 0.10           | 0.91              | 0.21            | 12.33           | 13.09            | 0.61           | 13.10           |
| 38               | 5.27                  | 1.19             | 0.15          | 0.09            | 3.86             | 0.14           | 1.36              | 0.19            | 14.10           | 14.69            | 1.23           | 14.74           |
| 41               | 4.87                  | 1.22             | 0.18          | 0.06            | 4.90             | 0.15           | 1.63              | 0.19            | 15.20           | 16.03            | 1.51           | 16.10           |

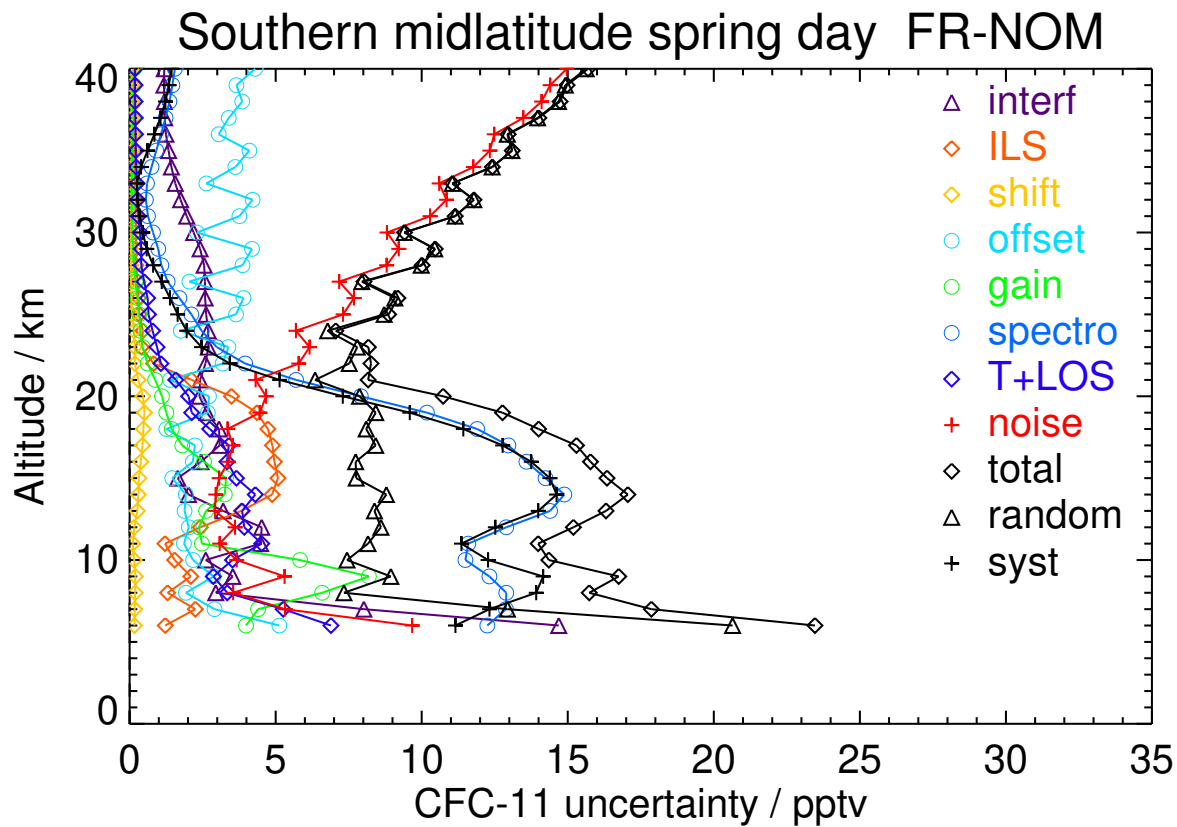

**Figure S21.** V8H\_F-11\_61 Southern midlatitude spring day

**Table S23.** CFC-11 error budget for Southern midlatitude spring night. All uncertainties are  $1\sigma$ .

| altitude<br>(km) | mean target<br>(pptv) | interf<br>(pptv) | ILS<br>(pptv) | shift<br>(pptv) | offset<br>(pptv) | gain<br>(pptv) | spectro<br>(pptv) | T+LOS<br>(pptv) | noise<br>(pptv) | random<br>(pptv) | syst<br>(pptv) | total<br>(pptv) |
|------------------|-----------------------|------------------|---------------|-----------------|------------------|----------------|-------------------|-----------------|-----------------|------------------|----------------|-----------------|
| 8                | 244.53                | 3.92             | 1.46          | 0.19            | 2.41             | 8.01           | 12.85             | 3.23            | 4.35            | 8.70             | 14.36          | 16.79           |
| 11               | 226.56                | 5.37             | 1.10          | 0.13            | 1.94             | 2.01           | 10.21             | 4.34            | 3.33            | 8.78             | 9.74           | 13.12           |
| 14               | 190.42                | 1.62             | 3.26          | 0.20            | 1.78             | 4.23           | 12.93             | 3.83            | 2.81            | 6.47             | 13.49          | 14.96           |
| 17               | 129.27                | 3.46             | 4.36          | 0.39            | 1.98             | 2.17           | 11.36             | 3.47            | 3.18            | 7.13             | 11.84          | 13.82           |
| 20               | 66.23                 | 2.28             | 3.66          | 0.49            | 2.48             | 1.61           | 8.03              | 2.17            | 4.18            | 6.75             | 8.29           | 10.69           |
| 23               | 33.75                 | 2.75             | 0.37          | 0.19            | 3.25             | 0.60           | 3.36              | 1.10            | 5.67            | 7.31             | 3.14           | 7.96            |
| 26               | 15.71                 | 2.51             | 0.37          | 0.04            | 3.95             | 0.38           | 2.00              | 0.68            | 7.36            | 8.83             | 1.68           | 8.99            |
| 29               | 11.76                 | 2.29             | 0.17          | 0.03            | 4.50             | 0.17           | 0.95              | 0.39            | 9.18            | 10.51            | 0.55           | 10.53           |
| 32               | 5.48                  | 1.59             | 0.17          | 0.05            | 4.43             | 0.12           | 0.71              | 0.27            | 10.93           | 11.92            | 0.32           | 11.93           |
| 35               | 3.88                  | 1.14             | 0.10          | 0.08            | 4.10             | 0.11           | 0.69              | 0.19            | 12.61           | 13.32            | 0.45           | 13.33           |
| 38               | 5.50                  | 1.02             | 0.15          | 0.08            | 3.83             | 0.13           | 1.24              | 0.19            | 14.39           | 14.94            | 1.13           | 14.98           |
| 41               | 5.36                  | 1.11             | 0.23          | 0.06            | 4.93             | 0.10           | 1.72              | 0.23            | 15.52           | 16.33            | 1.67           | 16.41           |

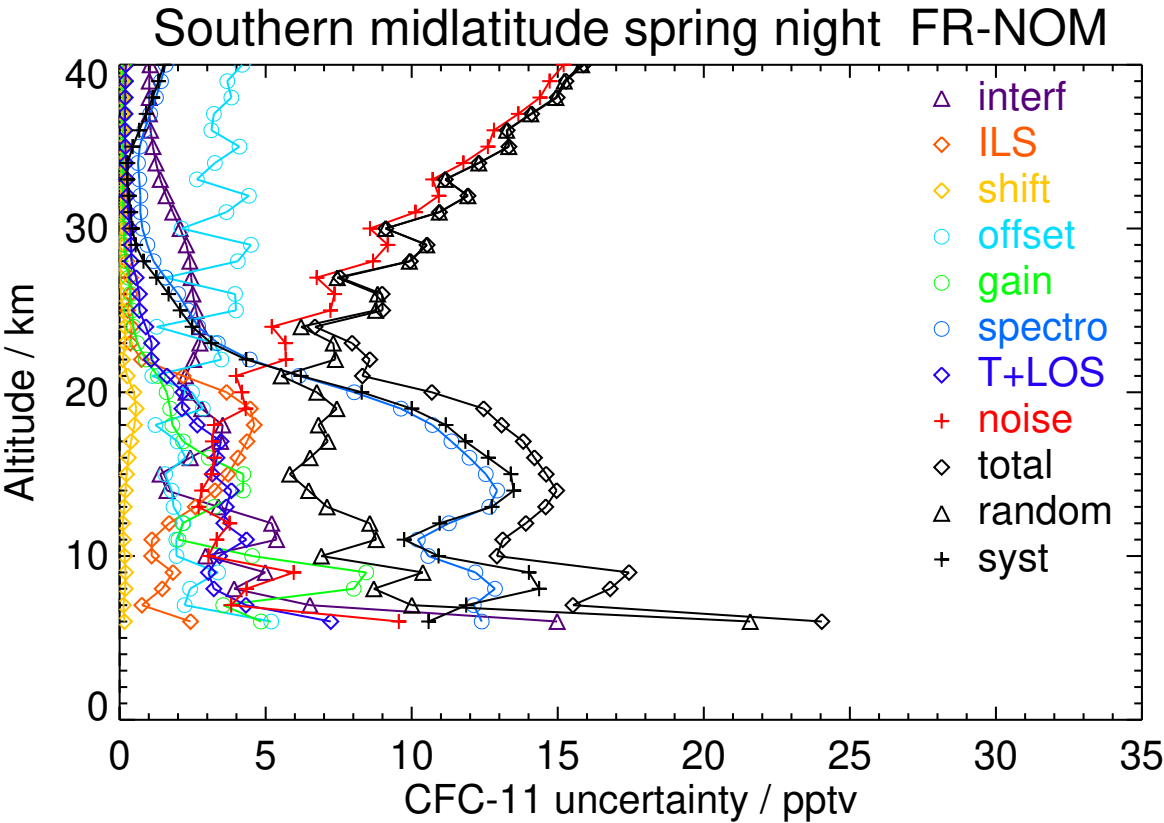

**Figure S22.** V8H\_F-11\_61 Southern midlatitude spring night

**Table S24.** CFC-11 error budget for Southern midlatitude summer day. All uncertainties are  $1\sigma$ .

| altitude<br>(km) | mean target<br>(pptv) | interf<br>(pptv) | ILS<br>(pptv) | shift<br>(pptv) | offset<br>(pptv) | gain<br>(pptv) | spectro<br>(pptv) | T+LOS<br>(pptv) | noise<br>(pptv) | random<br>(pptv) | syst<br>(pptv) | total<br>(pptv) |
|------------------|-----------------------|------------------|---------------|-----------------|------------------|----------------|-------------------|-----------------|-----------------|------------------|----------------|-----------------|
| 5                | 256.27                | 11.47            | 1.28          | 0.21            | 4.81             | 4.32           | 9.94              | 7.45            | 10.02           | 17.99            | 10.30          | 20.73           |
| 8                | 246.67                | 2.95             | 1.81          | 0.79            | 2.84             | 8.33           | 12.89             | 3.20            | 5.30            | 8.41             | 14.96          | 17.16           |
| 11               | 232.35                | 4.19             | 0.53          | 0.41            | 2.07             | 2.59           | 10.25             | 4.22            | 3.79            | 8.12             | 10.02          | 12.89           |
| 14               | 200.54                | 1.91             | 2.18          | 0.23            | 1.51             | 3.56           | 11.41             | 3.50            | 3.01            | 6.02             | 11.77          | 13.22           |
| 17               | 161.05                | 3.02             | 4.79          | 0.43            | 1.24             | 1.96           | 12.36             | 3.43            | 3.10            | 6.04             | 13.24          | 14.56           |
| 20               | 73.26                 | 2.34             | 5.17          | 0.23            | 1.32             | 1.34           | 10.78             | 2.64            | 3.92            | 6.09             | 11.71          | 13.20           |
| 23               | 23.93                 | 2.72             | 0.54          | 0.37            | 1.70             | 0.49           | 3.16              | 1.25            | 5.19            | 6.35             | 3.03           | 7.03            |
| 26               | 9.36                  | 2.62             | 0.37          | 0.06            | 2.14             | 0.17           | 1.33              | 0.63            | 6.69            | 7.57             | 1.08           | 7.65            |
| 29               | 7.22                  | 2.35             | 0.14          | 0.03            | 2.59             | 0.08           | 0.72              | 0.40            | 8.30            | 9.04             | 0.40           | 9.05            |
| 32               | 2.44                  | 1.76             | 0.25          | 0.09            | 2.95             | 0.07           | 0.55              | 0.29            | 9.97            | 10.56            | 0.28           | 10.57           |
| 35               | 4.97                  | 1.51             | 0.09          | 0.13            | 3.31             | 0.07           | 0.97              | 0.19            | 11.78           | 12.34            | 0.85           | 12.37           |
| 38               | 3.20                  | 1.18             | 0.16          | 0.12            | 3.18             | 0.11           | 1.44              | 0.19            | 13.57           | 14.00            | 1.35           | 14.06           |
| 41               | 0.55                  | 1.20             | 0.18          | 0.09            | 3.90             | 0.13           | 1.68              | 0.19            | 14.60           | 15.17            | 1.63           | 15.25           |

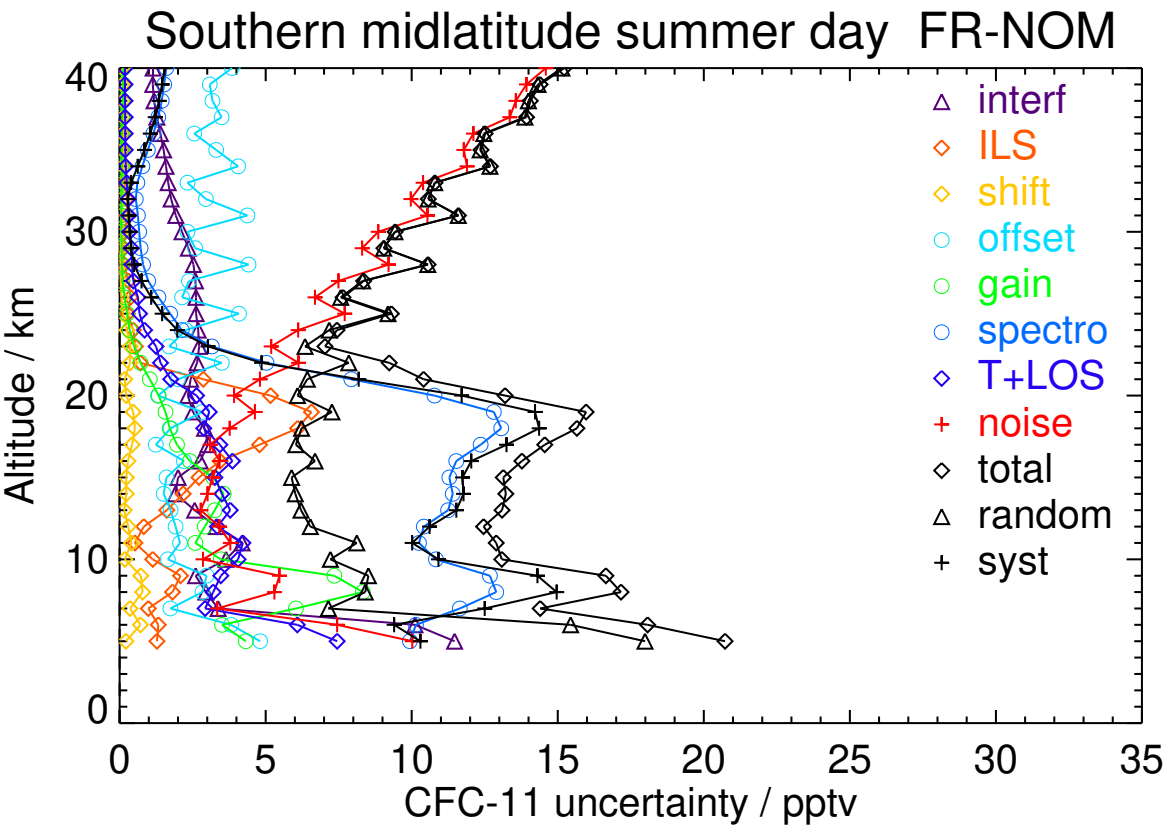

**Figure S23.** V8H\_F-11\_61 Southern midlatitude summer day

Table S25. CFC-11 error budget for Southern midlatitude summer night. All uncertainties are  $1\sigma$ .

| altitude<br>(km) | mean target<br>(pptv) | interf<br>(pptv) | ILS<br>(pptv) | shift<br>(pptv) | offset<br>(pptv) | gain<br>(pptv) | spectro<br>(pptv) | T+LOS<br>(pptv) | noise<br>(pptv) | random<br>(pptv) | syst<br>(pptv) | total<br>(pptv) |
|------------------|-----------------------|------------------|---------------|-----------------|------------------|----------------|-------------------|-----------------|-----------------|------------------|----------------|-----------------|
| 5                | 292.48                | 12.76            | 2.56          | 0.23            | 5.40             | 5.21           | 12.82             | 8.27            | 10.73           | 21.27            | 11.02          | 23.95           |
| 8                | 255.80                | 8.13             | 2.49          | 0.14            | 3.59             | 5.93           | 10.48             | 4.65            | 6.86            | 13.64            | 10.61          | 17.29           |
| 11               | 232.25                | 3.10             | 1.68          | 0.17            | 2.46             | 4.49           | 11.18             | 3.12            | 4.56            | 8.06             | 11.37          | 13.94           |
| 14               | 219.74                | 3.67             | 3.07          | 0.24            | 1.74             | 3.40           | 12.70             | 3.61            | 3.40            | 7.16             | 13.12          | 14.95           |
| 17               | 168.04                | 2.38             | 6.35          | 0.57            | 1.40             | 2.72           | 15.49             | 3.61            | 3.35            | 6.53             | 16.65          | 17.89           |
| 20               | 82.29                 | 2.70             | 4.84          | 0.23            | 1.39             | 1.50           | 11.27             | 2.63            | 4.11            | 6.38             | 12.04          | 13.63           |
| 23               | 24.35                 | 2.57             | 0.47          | 0.43            | 1.70             | 0.77           | 3.98              | 1.37            | 5.34            | 6.55             | 3.73           | 7.53            |
| 26               | 6.02                  | 2.67             | 0.45          | 0.06            | 2.09             | 0.14           | 1.26              | 0.68            | 6.80            | 7.67             | 1.09           | 7.74            |
| 29               | 4.42                  | 2.33             | 0.14          | 0.04            | 2.47             | 0.05           | 0.59              | 0.37            | 8.36            | 9.05             | 0.21           | 9.05            |
| 32               | 7.61                  | 1.75             | 0.22          | 0.08            | 2.82             | 0.08           | 0.60              | 0.25            | 9.93            | 10.48            | 0.36           | 10.49           |
| 35               | 6.69                  | 1.47             | 0.11          | 0.14            | 3.06             | 0.08           | 0.88              | 0.20            | 11.67           | 12.17            | 0.68           | 12.19           |
| 38               | 2.61                  | 1.14             | 0.15          | 0.11            | 3.05             | 0.11           | 1.38              | 0.18            | 13.47           | 13.87            | 1.32           | 13.93           |
| 41               | 4.05                  | 1.23             | 0.20          | 0.07            | 3.90             | 0.13           | 1.69              | 0.18            | 14.48           | 15.06            | 1.66           | 15.15           |

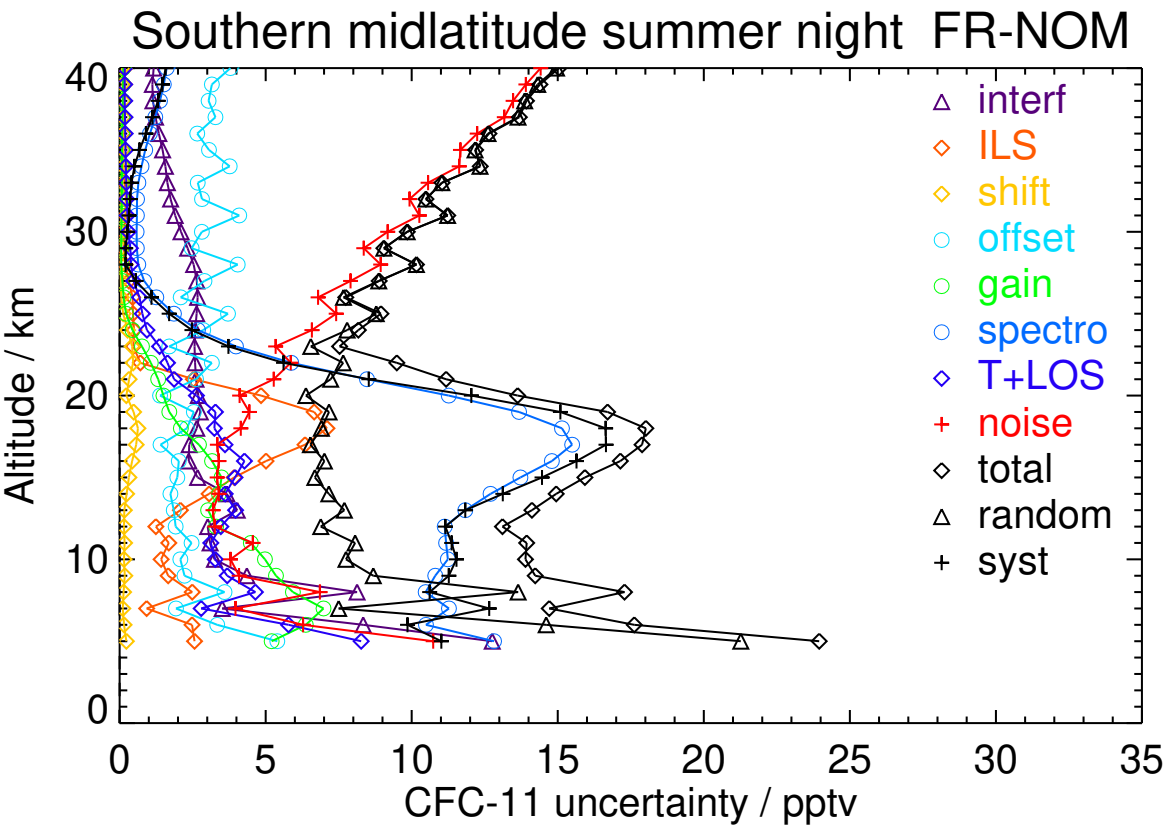

Figure S24. V8H\_F-11\_61 Southern midlatitude summer night

**Table S26.** CFC-11 error budget for Southern midlatitude autumn day. All uncertainties are  $1\sigma$ .

| altitude<br>(km) | mean target<br>(pptv) | interf<br>(pptv) | ILS<br>(pptv) | shift<br>(pptv) | offset<br>(pptv) | gain<br>(pptv) | spectro<br>(pptv) | T+LOS<br>(pptv) | noise<br>(pptv) | random<br>(pptv) | syst<br>(pptv) | total<br>(pptv) |
|------------------|-----------------------|------------------|---------------|-----------------|------------------|----------------|-------------------|-----------------|-----------------|------------------|----------------|-----------------|
| 5                | 277.33                | 9.13             | 1.36          | 0.15            | 4.16             | 1.60           | 12.11             | 7.32            | 7.28            | 14.40            | 12.29          | 18.93           |
| 8                | 258.54                | 7.32             | 1.25          | 0.18            | 2.68             | 4.48           | 12.54             | 4.44            | 4.60            | 11.01            | 12.62          | 16.75           |
| 11               | 236.24                | 2.74             | 0.85          | 0.08            | 2.12             | 4.10           | 9.77              | 3.20            | 3.34            | 6.51             | 10.20          | 12.10           |
| 14               | 221.75                | 3.11             | 2.82          | 0.21            | 2.02             | 3.52           | 13.68             | 3.80            | 3.00            | 6.76             | 14.10          | 15.64           |
| 17               | 153.43                | 2.39             | 5.30          | 0.78            | 2.38             | 2.67           | 14.72             | 3.03            | 3.66            | 6.50             | 15.63          | 16.93           |
| 20               | 76.23                 | 2.70             | 2.13          | 0.20            | 2.98             | 1.72           | 10.73             | 1.94            | 4.89            | 7.80             | 10.28          | 12.90           |
| 23               | 19.11                 | 2.57             | 0.46          | 0.19            | 3.51             | 0.65           | 3.81              | 1.00            | 6.44            | 8.07             | 3.40           | 8.75            |
| 26               | 12.88                 | 2.53             | 0.17          | 0.03            | 3.79             | 0.16           | 1.42              | 0.54            | 8.04            | 9.30             | 1.12           | 9.37            |
| 29               | 6.61                  | 2.19             | 0.13          | 0.04            | 3.70             | 0.13           | 1.04              | 0.39            | 9.70            | 10.64            | 0.88           | 10.67           |
| 32               | 7.65                  | 1.64             | 0.12          | 0.04            | 3.41             | 0.08           | 0.59              | 0.29            | 11.33           | 11.96            | 0.33           | 11.97           |
| 35               | 4.20                  | 1.24             | 0.09          | 0.05            | 3.29             | 0.10           | 0.78              | 0.23            | 13.23           | 13.70            | 0.59           | 13.71           |
| 38               | -2.10                 | 1.06             | 0.19          | 0.05            | 4.16             | 0.10           | 1.62              | 0.20            | 14.89           | 15.51            | 1.55           | 15.58           |
| 41               | 0.33                  | 1.14             | 0.28          | 0.04            | 6.75             | 0.09           | 2.27              | 0.20            | 16.32           | 17.70            | 2.24           | 17.84           |

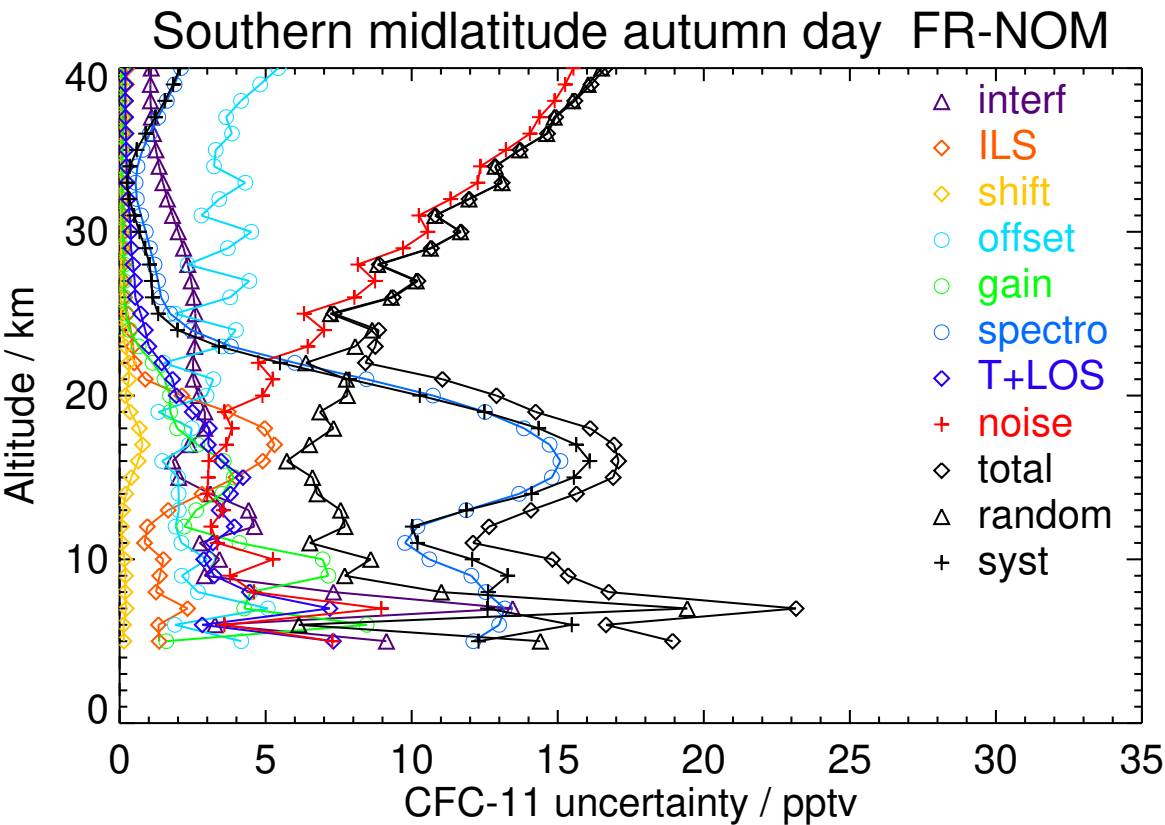

**Figure S25.** V8H\_F-11\_61 Southern midlatitude autumn day

**Table S27.** CFC-11 error budget for Southern midlatitude autumn night. All uncertainties are  $1\sigma$ .

| altitude<br>(km) | mean target<br>(pptv) | interf<br>(pptv) | ILS<br>(pptv) | shift<br>(pptv) | offset<br>(pptv) | gain<br>(pptv) | spectro<br>(pptv) | T+LOS<br>(pptv) | noise<br>(pptv) | random<br>(pptv) | syst<br>(pptv) | total<br>(pptv) |
|------------------|-----------------------|------------------|---------------|-----------------|------------------|----------------|-------------------|-----------------|-----------------|------------------|----------------|-----------------|
| 8                | 249.18                | 3.46             | 1.11          | 0.15            | 1.76             | 5.10           | 11.27             | 3.23            | 3.05            | 6.98             | 11.84          | 13.75           |
| 11               | 245.97                | 3.58             | 1.15          | 0.11            | 1.90             | 3.08           | 9.87              | 3.79            | 2.81            | 7.13             | 9.80           | 12.12           |
| 14               | 229.23                | 2.60             | 2.65          | 0.20            | 2.23             | 3.56           | 13.73             | 4.24            | 2.96            | 7.31             | 13.90          | 15.71           |
| 17               | 175.90                | 2.65             | 5.77          | 0.91            | 2.84             | 2.39           | 16.75             | 3.44            | 3.95            | 7.38             | 17.57          | 19.05           |
| 20               | 87.23                 | 2.65             | 1.78          | 0.30            | 3.57             | 1.85           | 11.36             | 2.17            | 5.33            | 7.84             | 11.28          | 13.74           |
| 23               | 27.45                 | 2.56             | 0.50          | 0.25            | 4.16             | 0.81           | 4.80              | 1.10            | 6.90            | 8.82             | 4.34           | 9.83            |
| 26               | 9.61                  | 2.56             | 0.25          | 0.05            | 4.41             | 0.16           | 1.53              | 0.58            | 8.39            | 9.88             | 1.21           | 9.96            |
| 29               | 8.17                  | 2.25             | 0.17          | 0.04            | 4.10             | 0.10           | 1.06              | 0.40            | 9.81            | 10.90            | 0.77           | 10.93           |
| 32               | 4.41                  | 1.70             | 0.16          | 0.06            | 3.52             | 0.06           | 0.74              | 0.30            | 11.24           | 11.93            | 0.34           | 11.93           |
| 35               | 3.40                  | 1.22             | 0.12          | 0.07            | 3.20             | 0.08           | 0.91              | 0.21            | 13.00           | 13.46            | 0.72           | 13.48           |
| 38               | 5.24                  | 1.07             | 0.18          | 0.05            | 3.99             | 0.11           | 1.55              | 0.18            | 14.72           | 15.30            | 1.48           | 15.38           |
| 41               | 5.45                  | 1.22             | 0.22          | 0.04            | 6.24             | 0.10           | 1.98              | 0.20            | 16.01           | 17.23            | 1.93           | 17.34           |

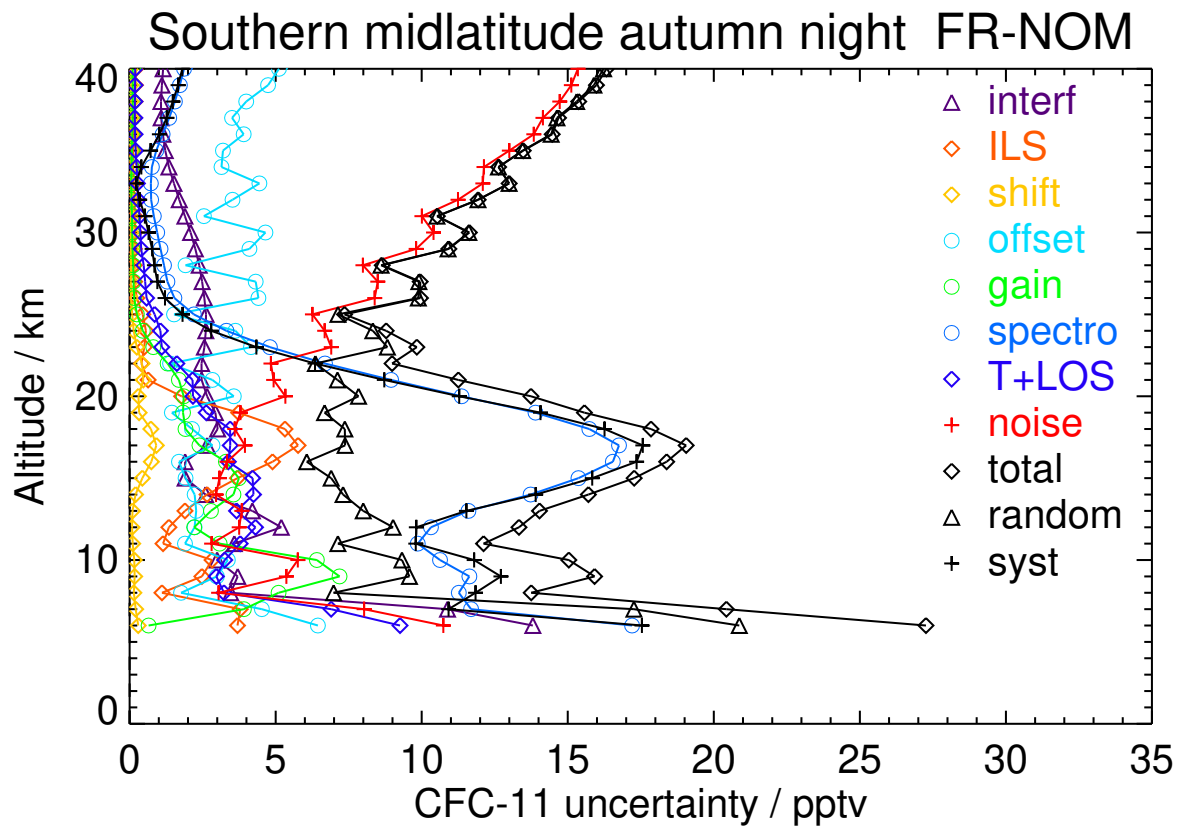

**Figure S26.** V8H\_F-11\_61 Southern midlatitude autumn night

**Table S28.** CFC-11 error budget for Southern polar winter day. All uncertainties are  $1\sigma$ .

| altitude<br>(km) | mean target<br>(pptv) | interf<br>(pptv) | ILS<br>(pptv) | shift<br>(pptv) | offset<br>(pptv) | gain<br>(pptv) | spectro<br>(pptv) | T+LOS<br>(pptv) | noise<br>(pptv) | random<br>(pptv) | syst<br>(pptv) | total<br>(pptv) |
|------------------|-----------------------|------------------|---------------|-----------------|------------------|----------------|-------------------|-----------------|-----------------|------------------|----------------|-----------------|
| 5                | 284.88                | 8.86             | 2.89          | 0.38            | 4.94             | 0.12           | 12.89             | 8.90            | 9.86            | 16.72            | 13.21          | 21.31           |
| 8                | 253.50                | 5.80             | 1.34          | 0.10            | 3.54             | 4.16           | 12.39             | 5.42            | 6.46            | 11.68            | 12.39          | 17.03           |
| 11               | 225.56                | 2.15             | 3.33          | 0.21            | 2.25             | 3.34           | 18.23             | 4.78            | 4.13            | 8.11             | 18.39          | 20.10           |
| 14               | 139.32                | 2.90             | 5.29          | 0.30            | 1.91             | 1.87           | 22.59             | 6.53            | 3.79            | 9.15             | 22.96          | 24.72           |
| 17               | 23.77                 | 2.34             | 2.51          | 0.23            | 1.54             | 0.90           | 9.28              | 3.20            | 4.68            | 7.18             | 9.04           | 11.54           |
| 20               | 1.77                  | 2.54             | 0.76          | 0.10            | 2.10             | 0.20           | 2.78              | 1.00            | 6.88            | 8.22             | 0.22           | 8.22            |
| 23               | -3.00                 | 2.57             | 0.23          | 0.06            | 3.03             | 0.05           | 0.94              | 0.38            | 9.36            | 10.21            | 0.41           | 10.22           |
| 26               | 0.82                  | 2.59             | 0.13          | 0.05            | 3.19             | 0.08           | 1.07              | 0.29            | 11.41           | 12.16            | 0.75           | 12.18           |
| 29               | 5.52                  | 2.32             | 0.20          | 0.06            | 3.21             | 0.08           | 0.88              | 0.28            | 12.81           | 13.43            | 0.44           | 13.44           |
| 32               | 3.99                  | 1.80             | 0.22          | 0.08            | 3.57             | 0.07           | 0.77              | 0.25            | 14.43           | 14.99            | 0.25           | 14.99           |
| 35               | 1.78                  | 1.47             | 0.23          | 0.07            | 4.60             | 0.07           | 0.85              | 0.23            | 16.06           | 16.79            | 0.39           | 16.80           |
| 38               | 1.82                  | 1.41             | 0.24          | 0.07            | 6.55             | 0.09           | 1.17              | 0.23            | 17.28           | 18.55            | 0.91           | 18.57           |
| 41               | -1.32                 | 1.52             | 0.18          | 0.06            | 9.99             | 0.12           | 1.55              | 0.24            | 18.30           | 20.91            | 1.45           | 20.96           |

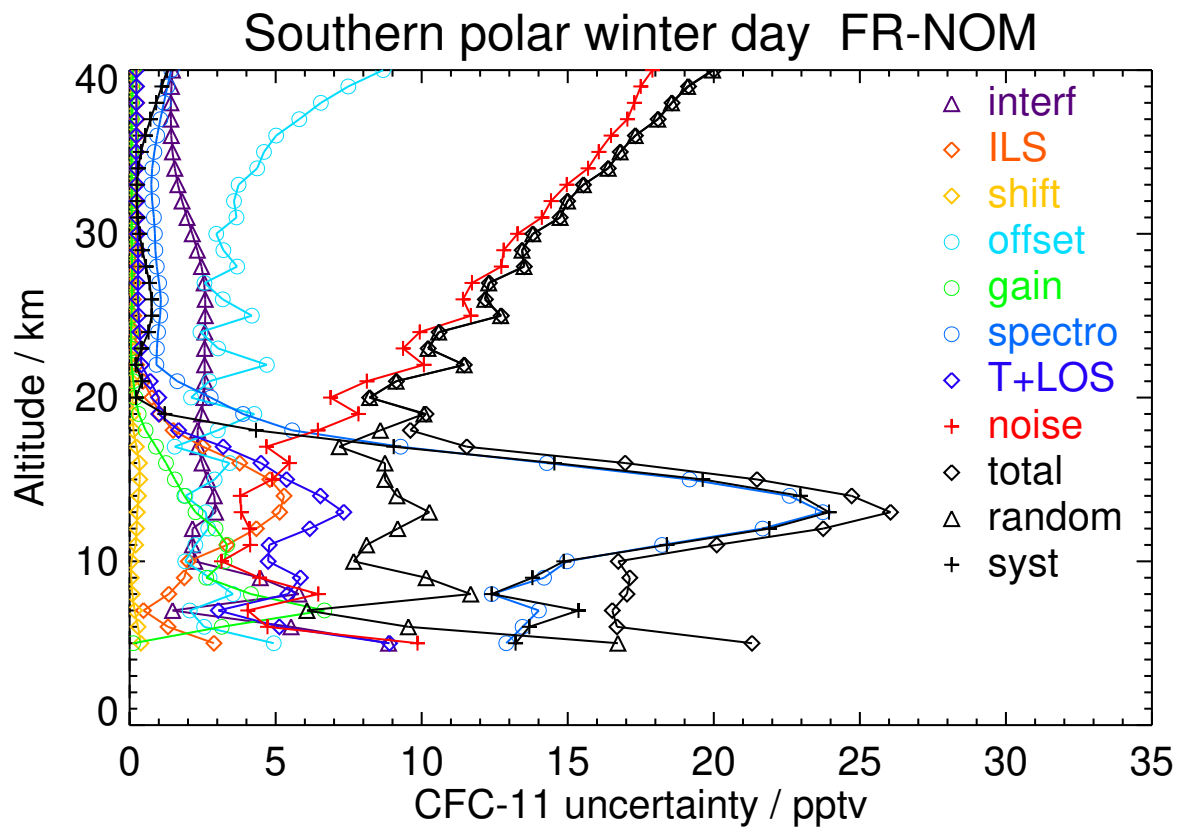

**Figure S27.** V8H\_F-11\_61 Southern polar winter day

**Table S29.** CFC-11 error budget for Southern polar winter night. All uncertainties are  $1\sigma$ .

| altitude<br>(km) | mean target<br>(pptv) | interf<br>(pptv) | ILS<br>(pptv) | shift<br>(pptv) | offset<br>(pptv) | gain<br>(pptv) | spectro<br>(pptv) | T+LOS<br>(pptv) | noise<br>(pptv) | random<br>(pptv) | syst<br>(pptv) | total<br>(pptv) |
|------------------|-----------------------|------------------|---------------|-----------------|------------------|----------------|-------------------|-----------------|-----------------|------------------|----------------|-----------------|
| 5                | 281.74                | 9.88             | 2.35          | 0.21            | 4.55             | 2.32           | 16.94             | 8.05            | 8.40            | 16.56            | 16.66          | 23.49           |
| 8                | 241.98                | 3.86             | 1.25          | 0.10            | 3.08             | 4.72           | 9.24              | 3.89            | 5.33            | 9.34             | 9.49           | 13.31           |
| 11               | 243.37                | 3.30             | 1.56          | 0.09            | 2.42             | 3.55           | 13.32             | 4.46            | 4.17            | 7.76             | 13.65          | 15.70           |
| 14               | 146.59                | 2.26             | 4.33          | 0.31            | 2.03             | 3.18           | 19.33             | 5.49            | 3.92            | 8.53             | 19.61          | 21.39           |
| 17               | 36.82                 | 2.47             | 2.61          | 0.17            | 1.88             | 1.03           | 9.20              | 3.10            | 4.74            | 7.16             | 9.12           | 11.59           |
| 20               | 1.20                  | 2.37             | 0.74          | 0.07            | 2.30             | 0.23           | 2.89              | 1.15            | 6.70            | 7.99             | 1.47           | 8.13            |
| 23               | -2.57                 | 2.53             | 0.37          | 0.07            | 3.03             | 0.10           | 1.07              | 0.48            | 9.16            | 10.04            | 0.36           | 10.05           |
| 26               | 3.41                  | 2.59             | 0.14          | 0.05            | 3.48             | 0.05           | 1.30              | 0.35            | 11.57           | 12.39            | 1.06           | 12.43           |
| 29               | 0.35                  | 2.33             | 0.29          | 0.05            | 3.53             | 0.08           | 1.23              | 0.36            | 13.31           | 14.01            | 0.83           | 14.03           |
| 32               | 3.31                  | 1.77             | 0.27          | 0.06            | 3.82             | 0.09           | 0.74              | 0.26            | 14.90           | 15.50            | 0.33           | 15.50           |
| 35               | 5.88                  | 1.40             | 0.27          | 0.06            | 5.04             | 0.09           | 1.01              | 0.24            | 16.50           | 17.33            | 0.64           | 17.34           |
| 38               | 3.30                  | 1.33             | 0.29          | 0.07            | 7.22             | 0.07           | 1.27              | 0.27            | 17.69           | 19.18            | 0.92           | 19.20           |
| 41               | -0.20                 | 1.47             | 0.33          | 0.08            | 11.05            | 0.14           | 1.63              | 0.31            | 18.91           | 21.97            | 1.39           | 22.01           |

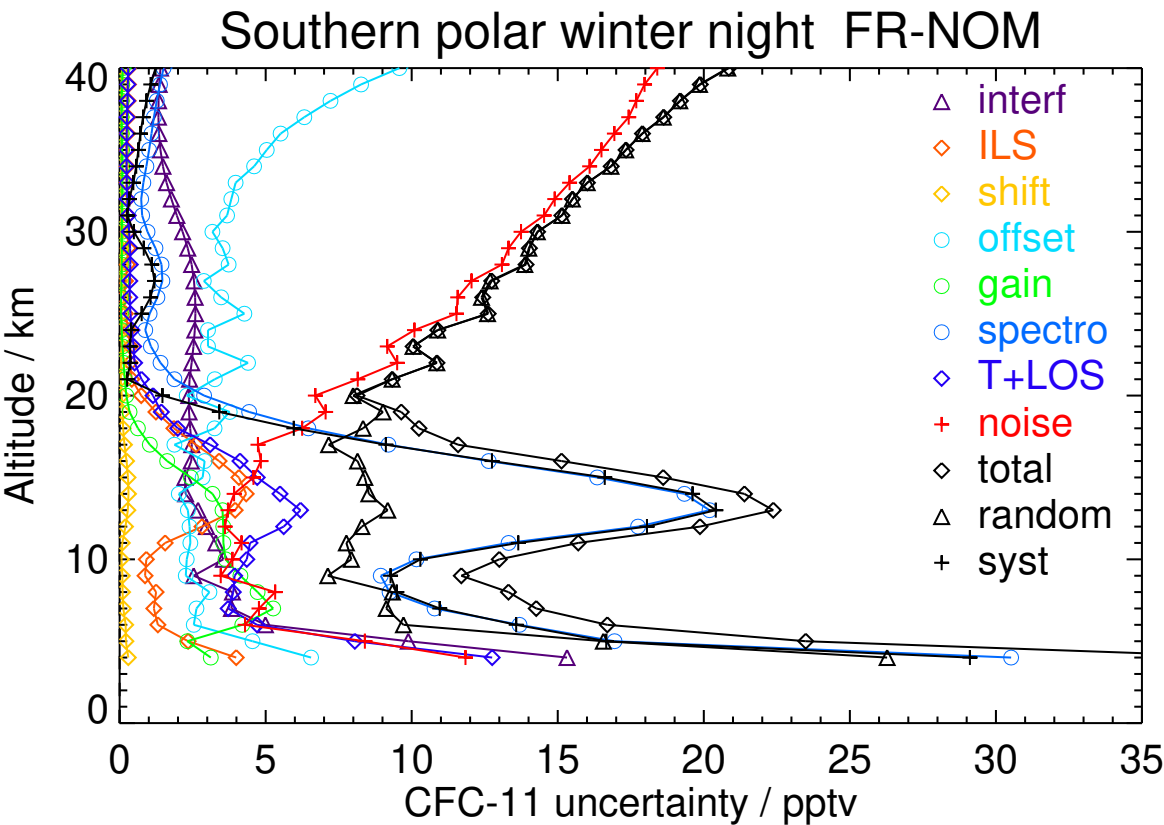

**Figure S28.** V8H\_F-11\_61 Southern polar winter night

**Table S30.** CFC-11 error budget for Southern polar spring day. All uncertainties are  $1\sigma$ .

| altitude<br>(km) | mean target<br>(pptv) | interf<br>(pptv) | ILS<br>(pptv) | shift<br>(pptv) | offset<br>(pptv) | gain<br>(pptv) | spectro<br>(pptv) | T+LOS<br>(pptv) | noise<br>(pptv) | random<br>(pptv) | syst<br>(pptv) | total<br>(pptv) |
|------------------|-----------------------|------------------|---------------|-----------------|------------------|----------------|-------------------|-----------------|-----------------|------------------|----------------|-----------------|
| 8                | 246.56                | 1.87             | 1.71          | 0.19            | 2.11             | 4.76           | 13.72             | 3.35            | 3.58            | 7.49             | 13.77          | 15.68           |
| 11               | 242.38                | 4.12             | 5.09          | 0.48            | 2.31             | 1.38           | 15.32             | 6.76            | 3.66            | 10.02            | 15.62          | 18.56           |
| 14               | 130.52                | 1.98             | 15.50         | 0.81            | 2.76             | 0.81           | 24.37             | 6.87            | 3.99            | 9.46             | 28.65          | 30.17           |
| 17               | -0.48                 | 2.69             | 4.13          | 0.47            | 3.37             | 0.31           | 4.50              | 2.15            | 5.20            | 7.38             | 5.78           | 9.37            |
| 20               | -0.42                 | 2.46             | 1.08          | 0.14            | 3.96             | 0.12           | 1.61              | 0.71            | 6.39            | 8.00             | 1.72           | 8.18            |
| 23               | 6.50                  | 2.94             | 0.34          | 0.07            | 4.33             | 0.09           | 0.82              | 0.49            | 7.39            | 9.10             | 0.29           | 9.11            |
| 26               | 6.68                  | 3.02             | 0.50          | 0.17            | 4.52             | 0.08           | 1.35              | 0.54            | 8.38            | 10.04            | 1.18           | 10.11           |
| 29               | 3.01                  | 2.85             | 0.57          | 0.09            | 4.58             | 0.10           | 0.75              | 0.39            | 9.40            | 10.88            | 0.50           | 10.89           |
| 32               | 2.43                  | 2.16             | 0.33          | 0.09            | 4.55             | 0.08           | 0.81              | 0.25            | 10.55           | 11.71            | 0.73           | 11.73           |
| 35               | 1.27                  | 1.58             | 0.19          | 0.13            | 4.42             | 0.13           | 0.82              | 0.22            | 11.79           | 12.70            | 0.73           | 12.72           |
| 38               | -1.17                 | 1.28             | 0.13          | 0.12            | 4.07             | 0.17           | 0.93              | 0.20            | 13.43           | 14.10            | 0.88           | 14.13           |
| 41               | -1.66                 | 1.16             | 0.13          | 0.09            | 4.44             | 0.24           | 1.06              | 0.22            | 14.81           | 15.51            | 1.02           | 15.54           |

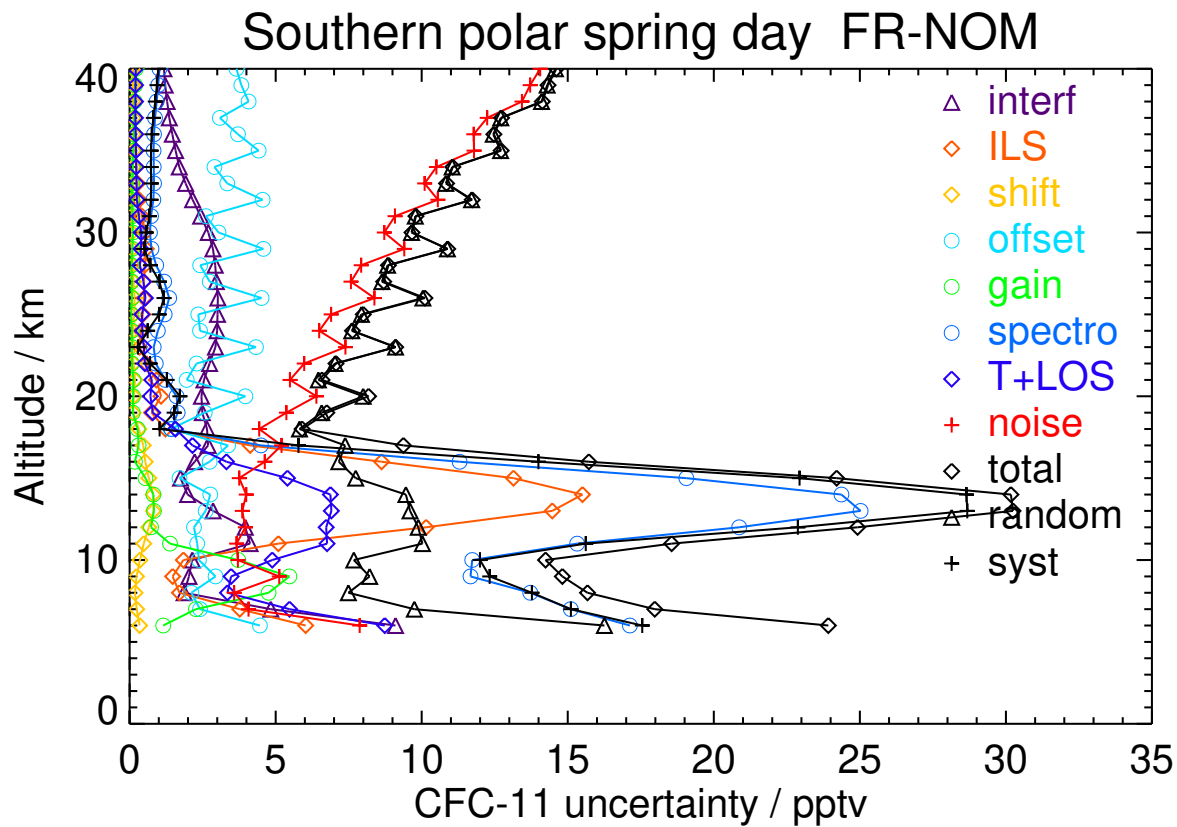

**Figure S29.** V8H\_F-11\_61 Southern polar spring day

**Table S31.** CFC-11 error budget for Southern polar spring night. All uncertainties are  $1\sigma$ .

| altitude<br>(km) | mean target<br>(pptv) | interf<br>(pptv) | ILS<br>(pptv) | shift<br>(pptv) | offset<br>(pptv) | gain<br>(pptv) | spectro<br>(pptv) | T+LOS<br>(pptv) | noise<br>(pptv) | random<br>(pptv) | syst<br>(pptv) | total<br>(pptv) |
|------------------|-----------------------|------------------|---------------|-----------------|------------------|----------------|-------------------|-----------------|-----------------|------------------|----------------|-----------------|
| 8                | 242.62                | 2.50             | 1.61          | 0.29            | 2.35             | 5.94           | 10.15             | 3.18            | 4.09            | 7.34             | 11.21          | 13.40           |
| 11               | 241.14                | 4.69             | 3.61          | 0.29            | 2.21             | 2.38           | 14.30             | 5.74            | 3.59            | 9.72             | 14.19          | 17.20           |
| 14               | 135.29                | 1.83             | 11.26         | 0.52            | 2.21             | 2.33           | 20.90             | 6.09            | 3.42            | 10.71            | 22.62          | 25.02           |
| 17               | 25.92                 | 2.94             | 4.20          | 0.68            | 2.64             | 0.69           | 6.31              | 2.59            | 4.37            | 7.49             | 6.61           | 9.99            |
| 20               | 11.47                 | 2.44             | 1.45          | 0.25            | 3.49             | 0.48           | 2.59              | 0.85            | 5.92            | 7.92             | 0.59           | 7.94            |
| 23               | 10.12                 | 2.83             | 0.34          | 0.12            | 4.25             | 0.26           | 1.56              | 0.45            | 7.36            | 9.10             | 0.52           | 9.12            |
| 26               | 7.68                  | 2.85             | 0.27          | 0.11            | 4.62             | 0.16           | 1.08              | 0.42            | 8.59            | 10.22            | 0.64           | 10.23           |
| 29               | 9.62                  | 2.74             | 0.43          | 0.11            | 4.66             | 0.15           | 0.97              | 0.39            | 9.78            | 11.21            | 0.67           | 11.23           |
| 32               | 3.22                  | 2.02             | 0.47          | 0.14            | 4.52             | 0.16           | 0.71              | 0.30            | 10.88           | 11.99            | 0.43           | 11.99           |
| 35               | 3.92                  | 1.58             | 0.18          | 0.12            | 4.36             | 0.16           | 0.89              | 0.20            | 12.11           | 12.98            | 0.75           | 13.00           |
| 38               | 4.12                  | 1.32             | 0.17          | 0.11            | 4.07             | 0.19           | 1.14              | 0.21            | 13.79           | 14.45            | 1.03           | 14.49           |
| 41               | 0.33                  | 1.17             | 0.17          | 0.09            | 4.86             | 0.24           | 1.21              | 0.21            | 14.99           | 15.82            | 1.15           | 15.86           |

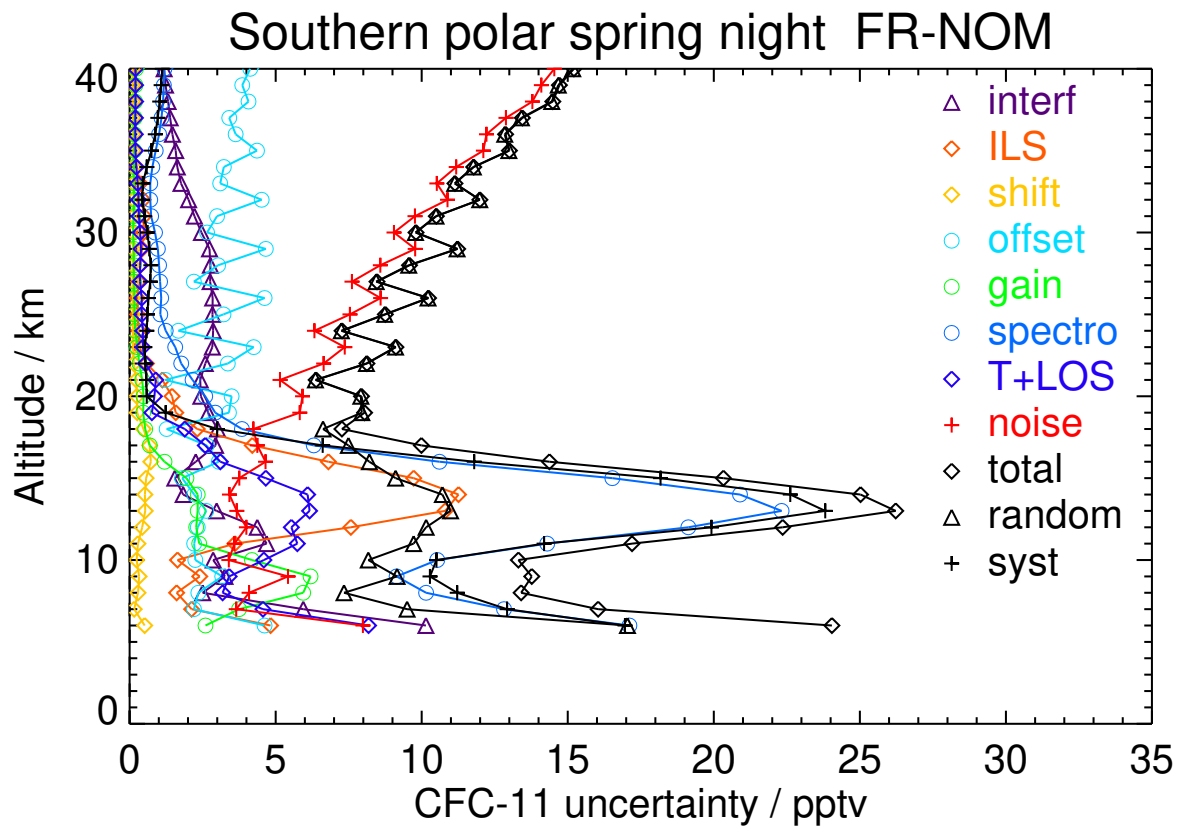

**Figure S30.** V8H\_F-11\_61 Southern polar spring night

**Table S32.** CFC-11 error budget for Southern polar summer day. All uncertainties are  $1\sigma$ .

| altitude<br>(km) | mean target<br>(pptv) | interf<br>(pptv) | ILS<br>(pptv) | shift<br>(pptv) | offset<br>(pptv) | gain<br>(pptv) | spectro<br>(pptv) | T+LOS<br>(pptv) | noise<br>(pptv) | random<br>(pptv) | syst<br>(pptv) | total<br>(pptv) |
|------------------|-----------------------|------------------|---------------|-----------------|------------------|----------------|-------------------|-----------------|-----------------|------------------|----------------|-----------------|
| 5                | 266.57                | 12.48            | 1.16          | 0.17            | 5.69             | 3.59           | 9.46              | 7.49            | 10.11           | 19.56            | 8.22           | 21.22           |
| 8                | 244.98                | 3.43             | 1.67          | 0.26            | 3.15             | 8.43           | 12.79             | 3.57            | 5.87            | 10.07            | 14.32          | 17.51           |
| 11               | 220.97                | 4.28             | 0.45          | 0.06            | 1.98             | 2.35           | 11.12             | 4.04            | 3.72            | 7.90             | 10.93          | 13.48           |
| 14               | 188.58                | 1.75             | 2.33          | 0.09            | 1.41             | 3.41           | 11.03             | 3.28            | 2.89            | 5.29             | 11.62          | 12.76           |
| 17               | 134.51                | 3.16             | 5.28          | 0.35            | 1.17             | 1.87           | 12.17             | 3.19            | 2.88            | 5.78             | 13.27          | 14.47           |
| 20               | 52.61                 | 2.42             | 3.57          | 0.36            | 1.35             | 1.24           | 8.01              | 2.10            | 3.64            | 5.35             | 8.67           | 10.19           |
| 23               | 15.41                 | 2.72             | 0.58          | 0.33            | 1.90             | 0.33           | 1.90              | 0.92            | 4.96            | 6.12             | 1.79           | 6.37            |
| 26               | 3.63                  | 2.53             | 0.19          | 0.07            | 2.63             | 0.15           | 0.90              | 0.49            | 6.66            | 7.64             | 0.55           | 7.66            |
| 29               | 5.65                  | 2.32             | 0.15          | 0.06            | 3.29             | 0.09           | 0.81              | 0.37            | 8.34            | 9.30             | 0.42           | 9.31            |
| 32               | 2.69                  | 1.91             | 0.30          | 0.08            | 3.68             | 0.07           | 0.57              | 0.31            | 10.09           | 10.92            | 0.41           | 10.93           |
| 35               | 4.25                  | 1.45             | 0.11          | 0.13            | 3.74             | 0.06           | 0.57              | 0.22            | 11.68           | 12.36            | 0.39           | 12.36           |
| 38               | 2.52                  | 1.18             | 0.12          | 0.14            | 3.39             | 0.14           | 1.14              | 0.18            | 13.31           | 13.80            | 1.07           | 13.84           |
| 41               | 3.63                  | 1.32             | 0.15          | 0.12            | 3.79             | 0.14           | 1.52              | 0.20            | 14.43           | 14.98            | 1.48           | 15.06           |

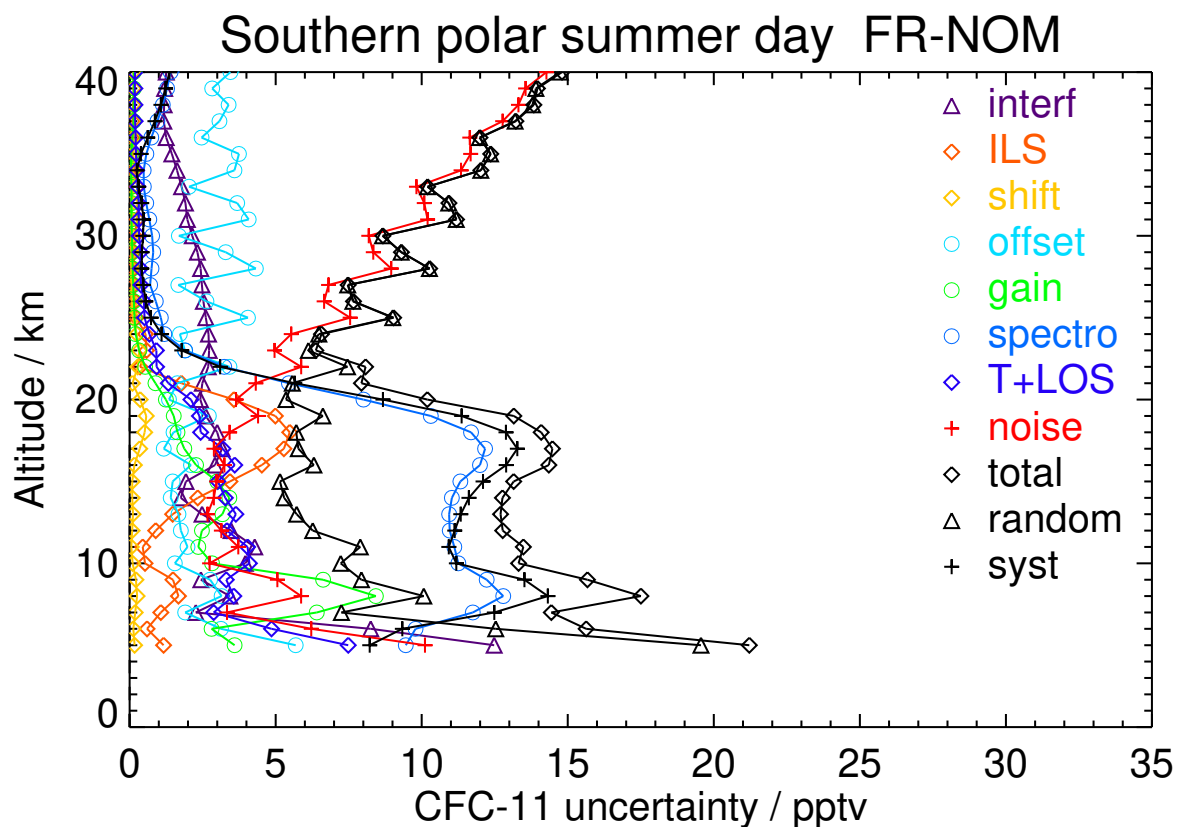**Figure S31.** V8H\_F-11\_61 Southern polar summer day

Table S33. CFC-11 error budget for Southern polar summer night. All uncertainties are  $1\sigma$ .

| altitude<br>(km) | mean target<br>(pptv) | interf<br>(pptv) | ILS<br>(pptv) | shift<br>(pptv) | offset<br>(pptv) | gain<br>(pptv) | spectro<br>(pptv) | T+LOS<br>(pptv) | noise<br>(pptv) | random<br>(pptv) | syst<br>(pptv) | total<br>(pptv) |
|------------------|-----------------------|------------------|---------------|-----------------|------------------|----------------|-------------------|-----------------|-----------------|------------------|----------------|-----------------|
| 5                | 282.19                | 9.91             | 0.95          | 0.20            | 4.27             | 0.30           | 10.74             | 7.66            | 9.23            | 16.13            | 10.79          | 19.41           |
| 8                | 250.63                | 9.37             | 0.76          | 0.18            | 3.12             | 2.03           | 10.13             | 4.25            | 6.29            | 13.01            | 9.66           | 16.20           |
| 11               | 225.43                | 2.25             | 0.51          | 0.06            | 2.07             | 4.74           | 10.72             | 2.67            | 4.06            | 6.07             | 11.56          | 13.06           |
| 14               | 206.43                | 3.92             | 2.68          | 0.12            | 1.59             | 2.54           | 12.13             | 3.08            | 3.19            | 6.37             | 12.56          | 14.08           |
| 17               | 139.85                | 2.11             | 5.65          | 0.68            | 1.36             | 2.96           | 13.75             | 2.85            | 3.27            | 5.42             | 15.03          | 15.98           |
| 20               | 57.11                 | 2.83             | 2.77          | 0.28            | 1.37             | 1.16           | 8.30              | 1.82            | 4.08            | 5.67             | 8.70           | 10.39           |
| 23               | 15.29                 | 2.45             | 0.45          | 0.31            | 1.44             | 0.53           | 2.22              | 0.91            | 5.27            | 6.12             | 2.16           | 6.49            |
| 26               | 6.91                  | 2.59             | 0.17          | 0.06            | 1.54             | 0.11           | 0.98              | 0.52            | 6.74            | 7.43             | 0.77           | 7.47            |
| 29               | 5.07                  | 2.28             | 0.11          | 0.05            | 1.93             | 0.06           | 0.80              | 0.36            | 8.43            | 8.97             | 0.52           | 8.99            |
| 32               | 4.56                  | 1.63             | 0.22          | 0.07            | 2.46             | 0.08           | 0.72              | 0.31            | 10.25           | 10.69            | 0.44           | 10.70           |
| 35               | -0.63                 | 1.34             | 0.11          | 0.10            | 2.92             | 0.07           | 0.73              | 0.21            | 12.25           | 12.67            | 0.53           | 12.69           |
| 38               | 1.48                  | 1.14             | 0.18          | 0.09            | 3.10             | 0.09           | 1.35              | 0.18            | 14.17           | 14.55            | 1.27           | 14.61           |
| 41               | 4.47                  | 1.12             | 0.23          | 0.07            | 4.09             | 0.13           | 1.75              | 0.19            | 15.17           | 15.76            | 1.71           | 15.85           |

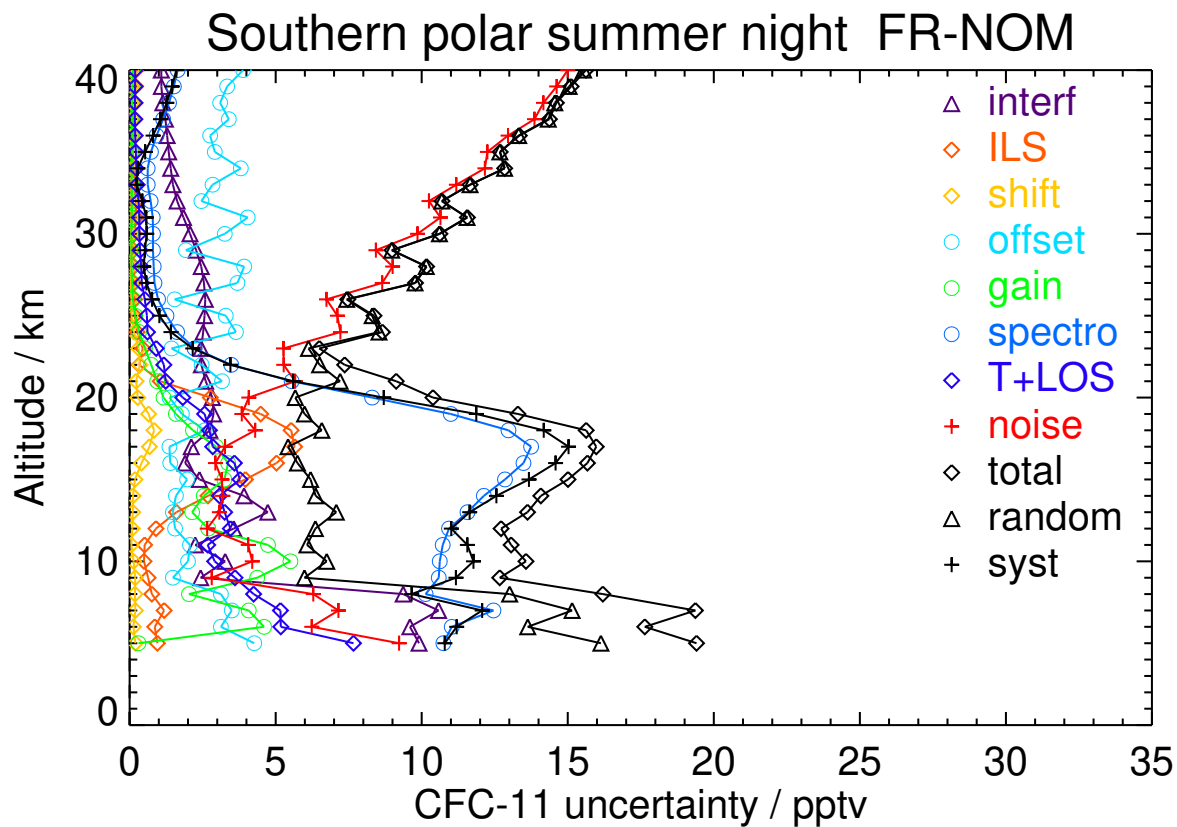

Figure S32. V8H\_F-11\_61 Southern polar summer night

**Table S34.** CFC-11 error budget for Southern polar autumn day. All uncertainties are  $1\sigma$ .

| altitude<br>(km) | mean target<br>(pptv) | interf<br>(pptv) | ILS<br>(pptv) | shift<br>(pptv) | offset<br>(pptv) | gain<br>(pptv) | spectro<br>(pptv) | T+LOS<br>(pptv) | noise<br>(pptv) | random<br>(pptv) | syst<br>(pptv) | total<br>(pptv) |
|------------------|-----------------------|------------------|---------------|-----------------|------------------|----------------|-------------------|-----------------|-----------------|------------------|----------------|-----------------|
| 5                | 267.01                | 7.03             | 1.01          | 0.20            | 3.42             | 3.72           | 15.51             | 6.57            | 5.60            | 11.84            | 15.84          | 19.77           |
| 8                | 248.87                | 4.28             | 1.20          | 0.26            | 2.06             | 4.94           | 14.43             | 4.61            | 3.33            | 8.35             | 14.81          | 17.00           |
| 11               | 223.82                | 3.15             | 0.54          | 0.11            | 1.87             | 2.66           | 9.65              | 3.17            | 2.78            | 6.06             | 9.74           | 11.48           |
| 14               | 193.32                | 2.79             | 3.25          | 0.33            | 2.22             | 3.69           | 14.89             | 3.88            | 2.98            | 6.32             | 15.58          | 16.81           |
| 17               | 94.82                 | 2.62             | 4.43          | 0.54            | 2.84             | 2.31           | 13.45             | 2.66            | 4.04            | 6.63             | 14.16          | 15.64           |
| 20               | 24.66                 | 2.61             | 0.85          | 0.07            | 3.55             | 0.86           | 5.41              | 1.16            | 5.61            | 7.48             | 5.18           | 9.10            |
| 23               | 4.63                  | 2.48             | 0.39          | 0.05            | 4.03             | 0.19           | 1.26              | 0.59            | 7.38            | 8.84             | 0.89           | 8.88            |
| 26               | 10.21                 | 2.52             | 0.16          | 0.04            | 3.93             | 0.11           | 1.28              | 0.47            | 9.09            | 10.26            | 1.01           | 10.31           |
| 29               | 5.71                  | 2.23             | 0.11          | 0.05            | 3.48             | 0.10           | 1.40              | 0.42            | 10.78           | 11.57            | 1.24           | 11.64           |
| 32               | 2.24                  | 1.64             | 0.15          | 0.04            | 3.32             | 0.08           | 0.85              | 0.33            | 12.60           | 13.16            | 0.44           | 13.17           |
| 35               | 1.16                  | 1.19             | 0.12          | 0.04            | 3.79             | 0.09           | 1.05              | 0.23            | 14.71           | 15.25            | 0.90           | 15.28           |
| 38               | 2.94                  | 1.08             | 0.23          | 0.05            | 5.35             | 0.10           | 1.84              | 0.22            | 16.28           | 17.19            | 1.76           | 17.28           |
| 41               | 3.11                  | 1.22             | 0.29          | 0.05            | 8.72             | 0.07           | 2.35              | 0.25            | 17.76           | 19.83            | 2.28           | 19.96           |

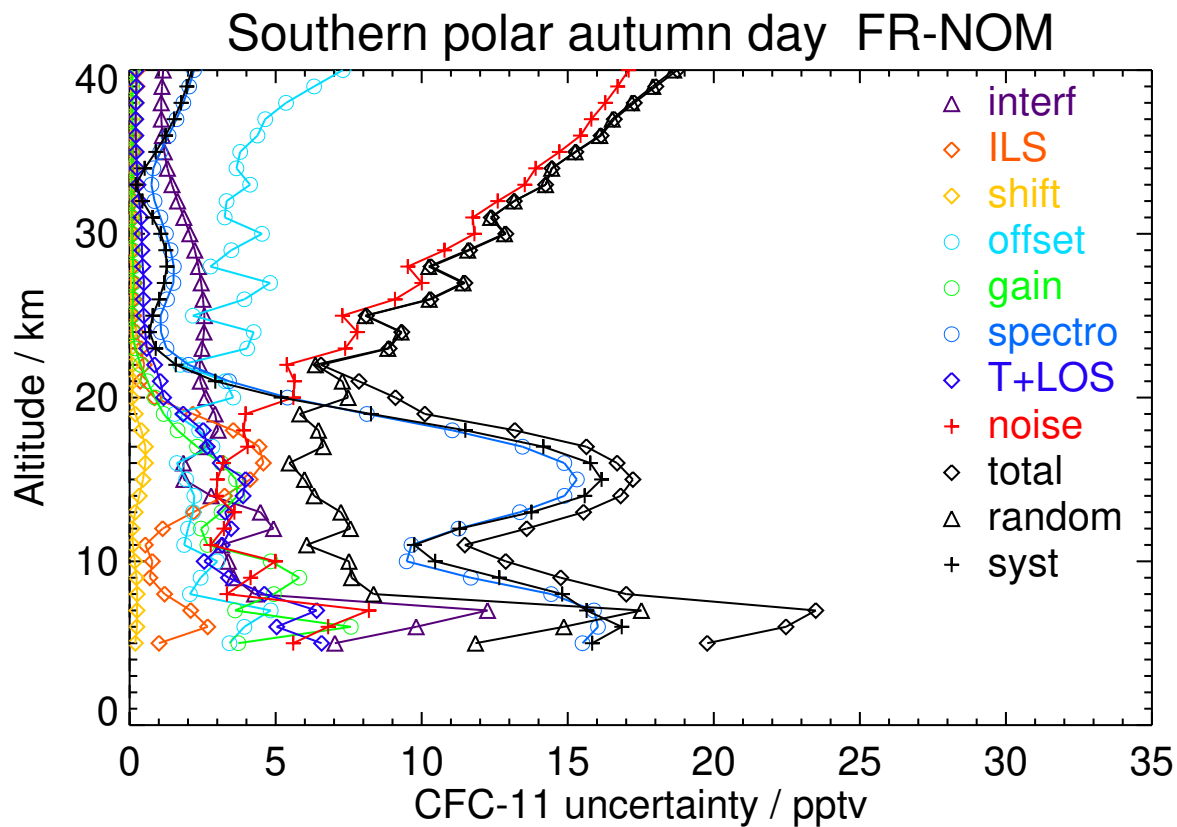

**Figure S33.** V8H\_F-11\_61 Southern polar autumn day

Table S35. CFC-11 error budget for Southern polar autumn night. All uncertainties are  $1\sigma$ .

| altitude<br>(km) | mean target<br>(pptv) | interf<br>(pptv) | ILS<br>(pptv) | shift<br>(pptv) | offset<br>(pptv) | gain<br>(pptv) | spectro<br>(pptv) | T+LOS<br>(pptv) | noise<br>(pptv) | random<br>(pptv) | syst<br>(pptv) | total<br>(pptv) |
|------------------|-----------------------|------------------|---------------|-----------------|------------------|----------------|-------------------|-----------------|-----------------|------------------|----------------|-----------------|
| 5                | 267.96                | 6.91             | 1.47          | 0.21            | 3.35             | 4.28           | 14.92             | 6.19            | 5.58            | 11.84            | 15.20          | 19.27           |
| 8                | 244.55                | 4.82             | 1.38          | 0.22            | 2.70             | 4.39           | 11.61             | 3.77            | 4.32            | 9.09             | 11.69          | 14.81           |
| 11               | 227.73                | 3.03             | 0.62          | 0.07            | 2.13             | 3.14           | 10.38             | 3.18            | 3.28            | 6.16             | 10.71          | 12.35           |
| 14               | 192.39                | 2.74             | 2.58          | 0.35            | 2.14             | 3.67           | 13.84             | 3.55            | 3.22            | 6.37             | 14.36          | 15.71           |
| 17               | 100.04                | 2.54             | 4.38          | 0.52            | 2.44             | 2.30           | 13.73             | 2.78            | 4.02            | 6.55             | 14.38          | 15.80           |
| 20               | 22.25                 | 2.56             | 1.29          | 0.10            | 2.73             | 0.83           | 5.72              | 1.39            | 5.41            | 6.93             | 5.68           | 8.96            |
| 23               | 7.86                  | 2.48             | 0.54          | 0.06            | 2.82             | 0.16           | 1.05              | 0.62            | 7.05            | 8.07             | 0.73           | 8.10            |
| 26               | 12.62                 | 2.50             | 0.15          | 0.05            | 2.80             | 0.16           | 1.64              | 0.47            | 8.90            | 9.71             | 1.40           | 9.81            |
| 29               | 7.16                  | 2.18             | 0.16          | 0.05            | 2.92             | 0.15           | 1.90              | 0.49            | 11.00           | 11.64            | 1.63           | 11.75           |
| 32               | -1.23                 | 1.64             | 0.17          | 0.04            | 3.28             | 0.08           | 0.91              | 0.37            | 13.21           | 13.74            | 0.55           | 13.75           |
| 35               | -2.94                 | 1.22             | 0.11          | 0.04            | 4.22             | 0.07           | 1.00              | 0.23            | 15.38           | 16.01            | 0.83           | 16.03           |
| 38               | -1.56                 | 1.12             | 0.21          | 0.05            | 6.23             | 0.07           | 1.83              | 0.24            | 16.99           | 18.14            | 1.73           | 18.23           |
| 41               | -1.10                 | 1.23             | 0.30          | 0.06            | 10.11            | 0.09           | 2.39              | 0.27            | 18.55           | 21.17            | 2.33           | 21.30           |

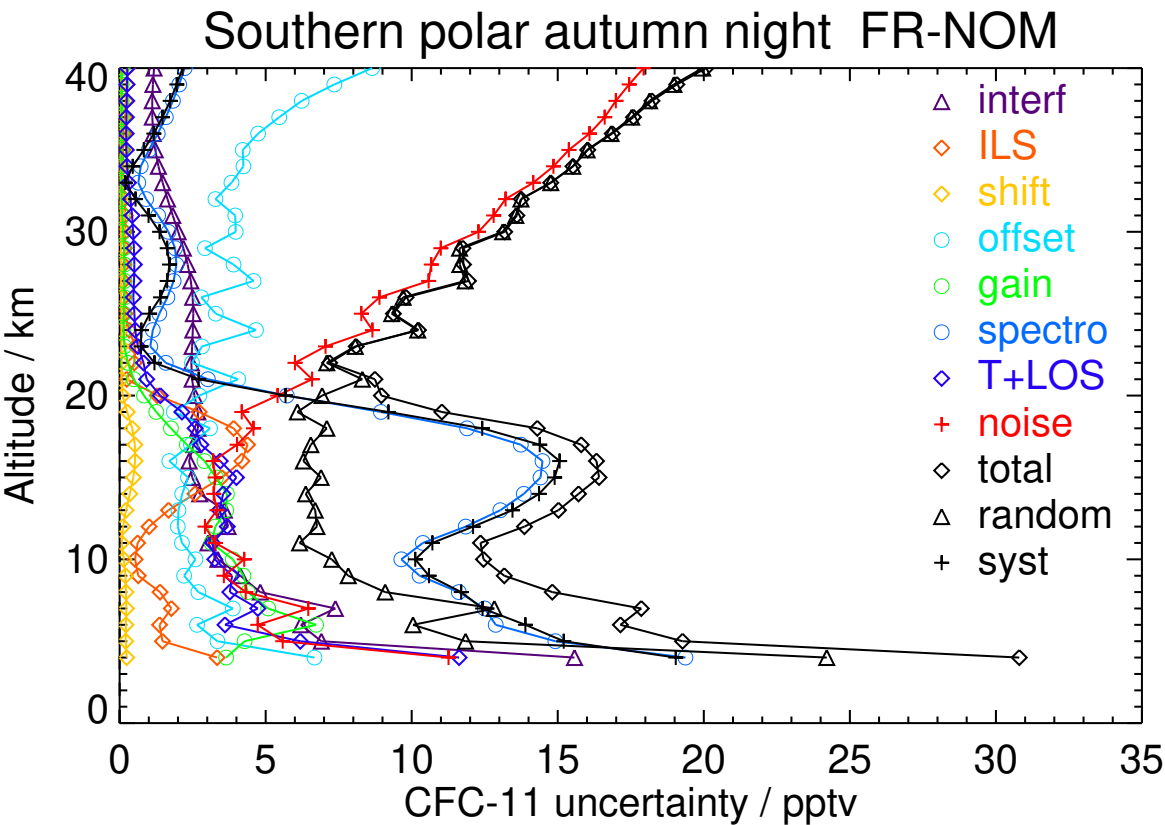

Figure S34. V8H\_F-11\_61 Southern polar autumn night

**Table S36.** CFC-11 error budget for Northern polar winter day. All uncertainties are  $1\sigma$ .

| altitude<br>(km) | mean target<br>(pptv) | interf<br>(pptv) | ILS<br>(pptv) | shift<br>(pptv) | offset<br>(pptv) | gain<br>(pptv) | spectro<br>(pptv) | T+LOS<br>(pptv) | noise<br>(pptv) | random<br>(pptv) | syst<br>(pptv) | total<br>(pptv) |
|------------------|-----------------------|------------------|---------------|-----------------|------------------|----------------|-------------------|-----------------|-----------------|------------------|----------------|-----------------|
| 8                | 251.10                | 2.90             | 2.55          | 0.26            | 1.74             | 3.34           | 12.46             | 6.41            | 5.42            | 9.87             | 12.54          | 15.96           |
| 11               | 214.22                | 3.11             | 4.64          | 0.28            | 1.14             | 2.88           | 14.26             | 4.29            | 4.50            | 8.15             | 14.71          | 16.82           |
| 14               | 147.28                | 2.41             | 6.64          | 0.32            | 1.61             | 2.57           | 13.86             | 3.62            | 4.62            | 8.52             | 14.59          | 16.90           |
| 17               | 83.50                 | 2.55             | 2.74          | 0.10            | 1.66             | 1.92           | 9.09              | 2.42            | 5.32            | 8.65             | 7.90           | 11.71           |
| 20               | 48.75                 | 2.59             | 1.41          | 0.12            | 0.59             | 1.18           | 5.74              | 1.50            | 5.80            | 7.80             | 4.30           | 8.90            |
| 23               | 23.04                 | 2.49             | 0.22          | 0.03            | 1.44             | 0.36           | 1.99              | 0.52            | 6.92            | 7.60             | 1.69           | 7.78            |
| 26               | 15.72                 | 2.45             | 0.30          | 0.02            | 1.54             | 0.15           | 1.20              | 0.35            | 7.88            | 8.46             | 0.72           | 8.49            |
| 29               | 14.99                 | 2.05             | 0.24          | 0.05            | 1.69             | 0.15           | 1.37              | 0.26            | 9.42            | 9.85             | 0.80           | 9.89            |
| 32               | 14.66                 | 1.39             | 0.29          | 0.08            | 2.38             | 0.21           | 1.19              | 0.25            | 11.16           | 11.54            | 0.77           | 11.56           |
| 35               | 9.87                  | 1.08             | 0.17          | 0.05            | 3.01             | 0.18           | 1.09              | 0.19            | 13.77           | 14.17            | 0.59           | 14.19           |
| 38               | 4.77                  | 0.96             | 0.15          | 0.03            | 3.85             | 0.13           | 1.65              | 0.17            | 15.89           | 16.40            | 1.43           | 16.46           |
| 41               | 1.40                  | 1.00             | 0.19          | 0.03            | 6.94             | 0.11           | 2.00              | 0.17            | 18.31           | 19.62            | 1.87           | 19.71           |

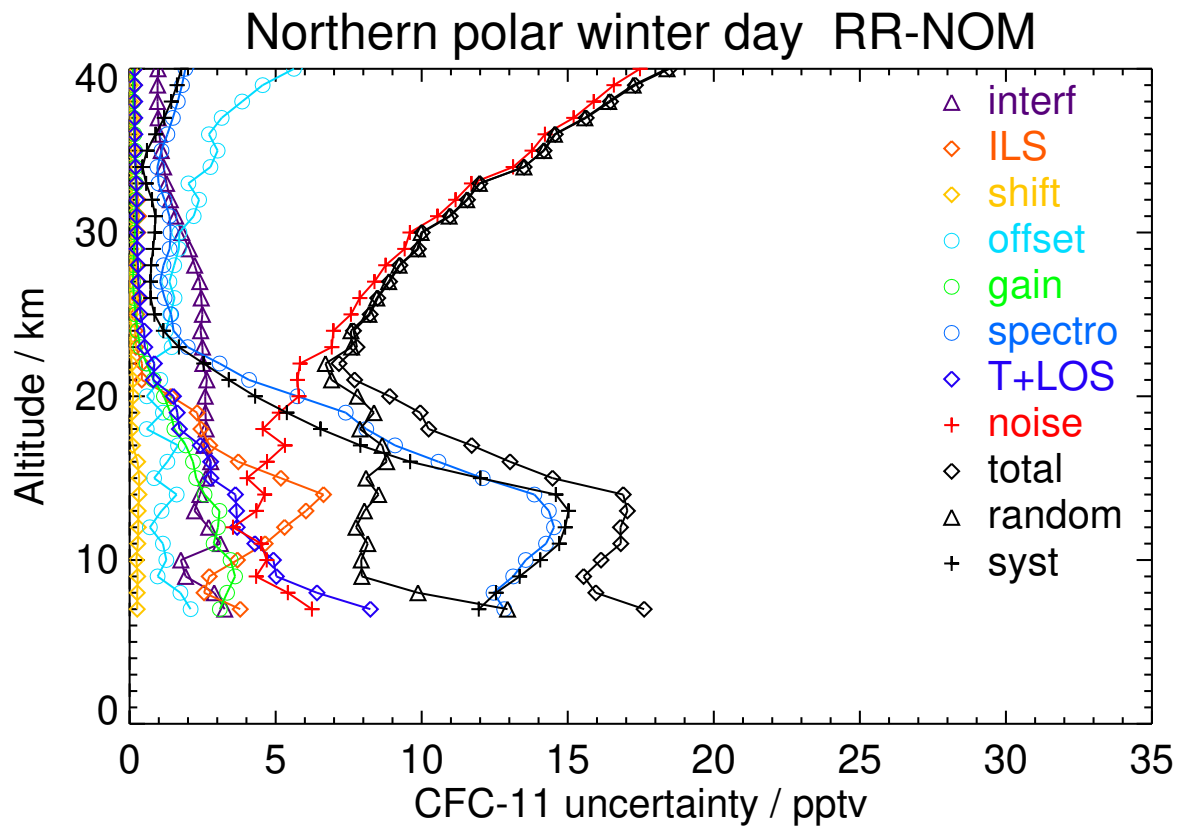

**Figure S35.** V8R\_F-11\_261 Northern polar winter day

**Table S37.** CFC-11 error budget for Northern polar winter night. All uncertainties are  $1\sigma$ .

| altitude<br>(km) | mean target<br>(pptv) | interf<br>(pptv) | ILS<br>(pptv) | shift<br>(pptv) | offset<br>(pptv) | gain<br>(pptv) | spectro<br>(pptv) | T+LOS<br>(pptv) | noise<br>(pptv) | random<br>(pptv) | syst<br>(pptv) | total<br>(pptv) |
|------------------|-----------------------|------------------|---------------|-----------------|------------------|----------------|-------------------|-----------------|-----------------|------------------|----------------|-----------------|
| 8                | 247.76                | 2.33             | 2.05          | 0.18            | 2.06             | 3.01           | 11.18             | 6.79            | 5.88            | 9.87             | 11.45          | 15.12           |
| 11               | 228.29                | 2.82             | 4.64          | 0.19            | 1.06             | 2.90           | 14.32             | 4.75            | 4.72            | 8.09             | 14.95          | 17.00           |
| 14               | 159.11                | 2.44             | 6.76          | 0.23            | 1.38             | 2.21           | 14.42             | 3.82            | 4.72            | 8.61             | 15.14          | 17.42           |
| 17               | 69.80                 | 2.48             | 3.26          | 0.11            | 1.41             | 1.29           | 8.99              | 2.64            | 5.50            | 7.40             | 9.15           | 11.77           |
| 20               | 31.21                 | 2.48             | 1.20          | 0.06            | 0.74             | 0.92           | 4.64              | 1.20            | 5.83            | 7.38             | 3.39           | 8.12            |
| 23               | 12.84                 | 2.53             | 0.37          | 0.05            | 1.62             | 0.27           | 1.52              | 0.51            | 7.74            | 8.41             | 0.95           | 8.47            |
| 26               | 16.80                 | 2.73             | 0.36          | 0.03            | 1.17             | 0.11           | 0.84              | 0.30            | 7.40            | 8.01             | 0.55           | 8.03            |
| 29               | 16.00                 | 2.43             | 0.40          | 0.06            | 1.80             | 0.12           | 1.08              | 0.25            | 9.38            | 9.91             | 0.58           | 9.92            |
| 32               | 14.62                 | 2.06             | 0.63          | 0.11            | 2.26             | 0.19           | 0.91              | 0.25            | 10.17           | 10.66            | 0.68           | 10.68           |
| 35               | 9.28                  | 1.73             | 0.30          | 0.07            | 2.93             | 0.14           | 1.15              | 0.19            | 12.06           | 12.56            | 0.82           | 12.59           |
| 38               | 6.28                  | 1.47             | 0.22          | 0.04            | 3.16             | 0.09           | 1.60              | 0.18            | 13.77           | 14.22            | 1.47           | 14.30           |
| 41               | 6.16                  | 1.42             | 0.23          | 0.04            | 4.27             | 0.08           | 1.68              | 0.17            | 15.55           | 16.20            | 1.56           | 16.28           |

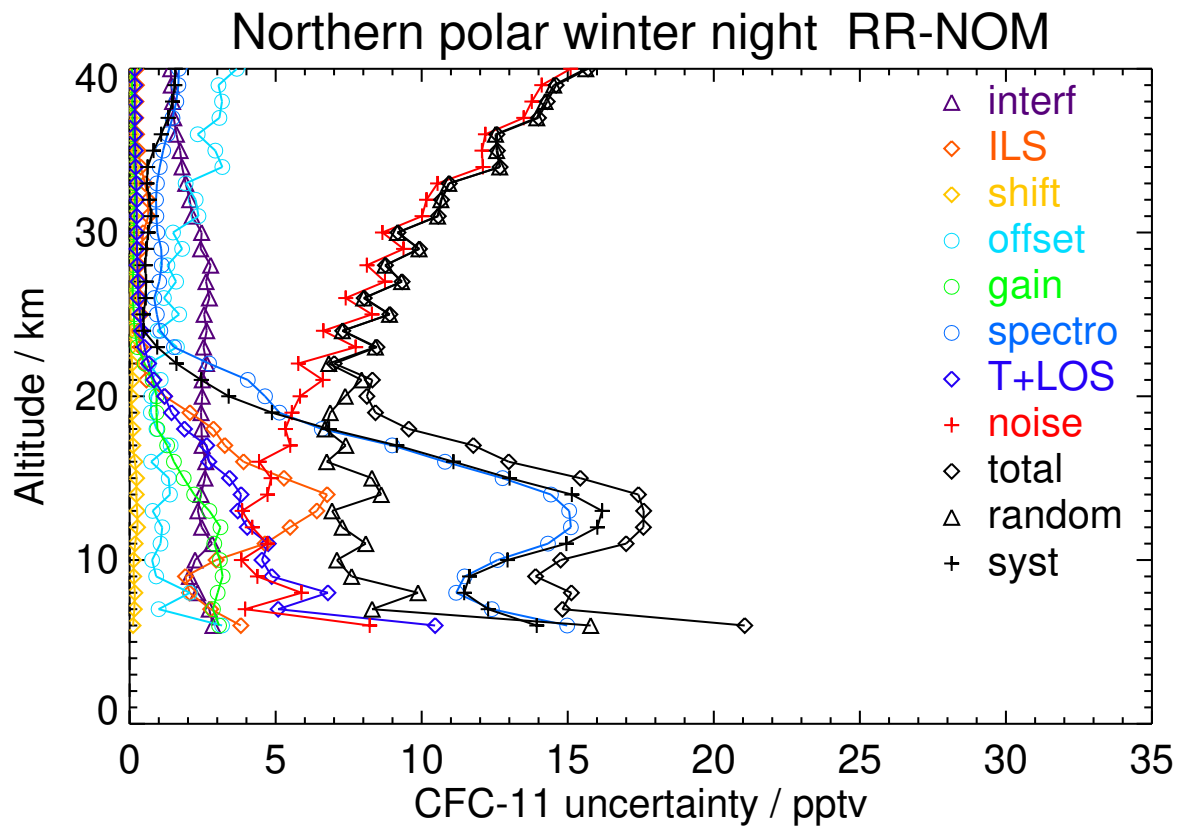

**Figure S36.** V8R\_F-11\_261 Northern polar winter night

**Table S38.** CFC-11 error budget for Northern polar spring day. All uncertainties are  $1\sigma$ .

| altitude<br>(km) | mean target<br>(pptv) | interf<br>(pptv) | ILS<br>(pptv) | shift<br>(pptv) | offset<br>(pptv) | gain<br>(pptv) | spectro<br>(pptv) | T+LOS<br>(pptv) | noise<br>(pptv) | random<br>(pptv) | syst<br>(pptv) | total<br>(pptv) |
|------------------|-----------------------|------------------|---------------|-----------------|------------------|----------------|-------------------|-----------------|-----------------|------------------|----------------|-----------------|
| 8                | 235.09                | 2.84             | 2.74          | 0.20            | 1.05             | 3.17           | 12.48             | 5.93            | 4.43            | 9.19             | 12.36          | 15.40           |
| 11               | 195.05                | 2.59             | 2.99          | 0.16            | 0.72             | 2.85           | 11.28             | 3.83            | 3.67            | 6.59             | 11.67          | 13.40           |
| 14               | 161.62                | 2.30             | 4.20          | 0.22            | 0.79             | 2.83           | 13.36             | 3.31            | 4.04            | 6.29             | 14.07          | 15.41           |
| 17               | 88.80                 | 2.49             | 2.35          | 0.08            | 0.70             | 1.80           | 9.87              | 2.29            | 4.76            | 6.40             | 9.99           | 11.86           |
| 20               | 31.22                 | 2.52             | 0.68          | 0.10            | 0.80             | 0.83           | 4.79              | 1.13            | 5.76            | 6.72             | 4.51           | 8.10            |
| 23               | 14.64                 | 2.30             | 0.17          | 0.05            | 1.34             | 0.22           | 1.70              | 0.50            | 7.61            | 8.15             | 1.33           | 8.26            |
| 26               | 4.29                  | 2.40             | 0.20          | 0.02            | 1.41             | 0.15           | 1.16              | 0.28            | 8.93            | 9.42             | 0.66           | 9.44            |
| 29               | 3.68                  | 2.11             | 0.28          | 0.06            | 1.67             | 0.11           | 0.90              | 0.22            | 10.67           | 11.03            | 0.60           | 11.05           |
| 32               | 0.90                  | 1.49             | 0.30          | 0.07            | 2.21             | 0.14           | 0.60              | 0.17            | 12.64           | 12.94            | 0.30           | 12.94           |
| 35               | 6.30                  | 1.17             | 0.13          | 0.04            | 2.82             | 0.17           | 1.16              | 0.15            | 14.91           | 15.24            | 0.95           | 15.26           |
| 38               | 13.70                 | 1.28             | 0.16          | 0.02            | 3.48             | 0.14           | 1.75              | 0.17            | 16.52           | 16.95            | 1.63           | 17.03           |
| 41               | 15.92                 | 1.65             | 0.25          | 0.02            | 4.96             | 0.10           | 2.11              | 0.18            | 17.66           | 18.43            | 2.02           | 18.54           |

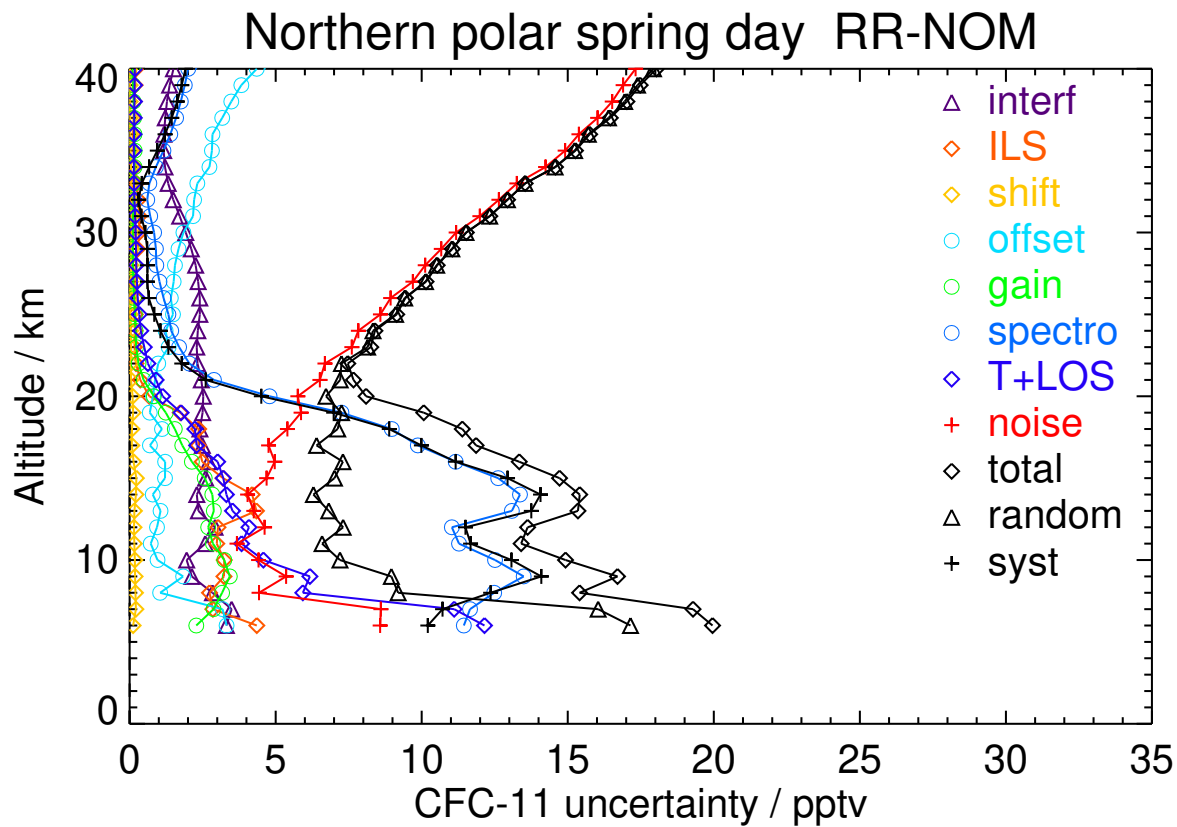

**Figure S37.** V8R\_F-11\_261 Northern polar spring day

**Table S39.** CFC-11 error budget for Northern polar spring night. All uncertainties are  $1\sigma$ .

| altitude<br>(km) | mean target<br>(pptv) | interf<br>(pptv) | ILS<br>(pptv) | shift<br>(pptv) | offset<br>(pptv) | gain<br>(pptv) | spectro<br>(pptv) | T+LOS<br>(pptv) | noise<br>(pptv) | random<br>(pptv) | syst<br>(pptv) | total<br>(pptv) |
|------------------|-----------------------|------------------|---------------|-----------------|------------------|----------------|-------------------|-----------------|-----------------|------------------|----------------|-----------------|
| 8                | 242.25                | 3.24             | 2.88          | 0.28            | 2.40             | 3.01           | 12.80             | 8.51            | 6.76            | 12.38            | 12.75          | 17.77           |
| 11               | 201.16                | 2.25             | 3.44          | 0.25            | 1.01             | 2.93           | 12.22             | 4.31            | 4.24            | 7.21             | 12.66          | 14.57           |
| 14               | 171.07                | 2.23             | 4.14          | 0.28            | 0.86             | 2.50           | 12.17             | 3.40            | 4.43            | 7.04             | 12.61          | 14.44           |
| 17               | 112.86                | 2.58             | 3.13          | 0.19            | 1.16             | 2.24           | 12.51             | 2.93            | 5.23            | 7.41             | 12.66          | 14.67           |
| 20               | 38.92                 | 2.43             | 1.18          | 0.14            | 0.73             | 1.03           | 6.01              | 1.50            | 5.96            | 7.09             | 5.70           | 9.10            |
| 23               | 13.49                 | 2.33             | 0.32          | 0.05            | 1.49             | 0.32           | 2.44              | 0.54            | 7.91            | 8.56             | 1.83           | 8.76            |
| 26               | 5.58                  | 2.39             | 0.18          | 0.02            | 1.51             | 0.13           | 1.06              | 0.29            | 8.81            | 9.29             | 0.76           | 9.33            |
| 29               | 1.33                  | 2.08             | 0.31          | 0.06            | 1.71             | 0.10           | 0.82              | 0.20            | 10.77           | 11.13            | 0.56           | 11.14           |
| 32               | 3.98                  | 1.52             | 0.23          | 0.06            | 2.27             | 0.11           | 0.61              | 0.15            | 12.52           | 12.83            | 0.36           | 12.83           |
| 35               | 7.10                  | 1.19             | 0.11          | 0.04            | 2.90             | 0.12           | 1.22              | 0.14            | 14.79           | 15.13            | 1.11           | 15.17           |
| 38               | 7.64                  | 1.25             | 0.17          | 0.02            | 3.49             | 0.11           | 1.84              | 0.16            | 16.37           | 16.79            | 1.79           | 16.88           |
| 41               | 7.51                  | 1.62             | 0.31          | 0.01            | 5.12             | 0.11           | 2.31              | 0.18            | 17.62           | 18.43            | 2.27           | 18.57           |

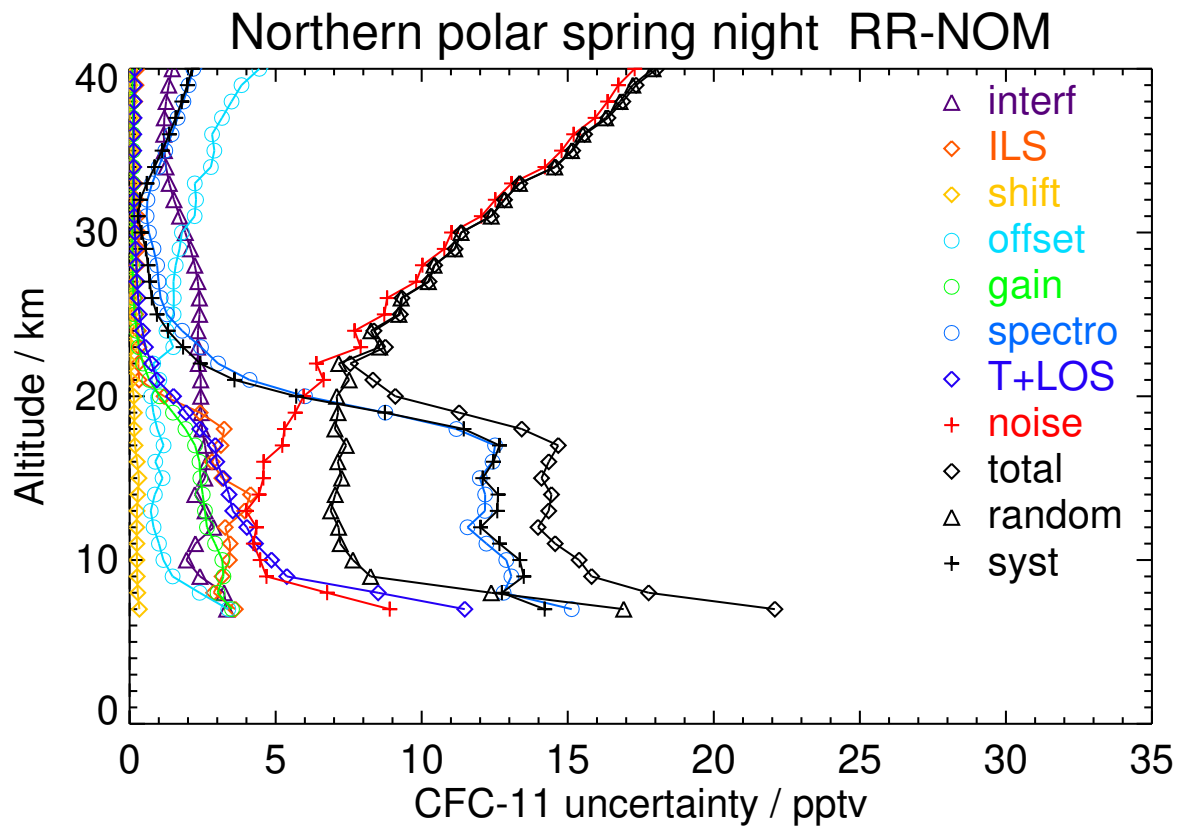

**Figure S38.** V8R\_F-11\_261 Northern polar spring night

**Table S40.** CFC-11 error budget for Northern polar summer day. All uncertainties are  $1\sigma$ .

| altitude<br>(km) | mean target<br>(pptv) | interf<br>(pptv) | ILS<br>(pptv) | shift<br>(pptv) | offset<br>(pptv) | gain<br>(pptv) | spectro<br>(pptv) | T+LOS<br>(pptv) | noise<br>(pptv) | random<br>(pptv) | syst<br>(pptv) | total<br>(pptv) |
|------------------|-----------------------|------------------|---------------|-----------------|------------------|----------------|-------------------|-----------------|-----------------|------------------|----------------|-----------------|
| 8                | 230.57                | 2.65             | 1.88          | 0.08            | 1.40             | 1.51           | 7.05              | 5.56            | 5.24            | 8.21             | 7.45           | 11.09           |
| 11               | 225.14                | 1.91             | 2.59          | 0.22            | 1.49             | 3.12           | 11.07             | 4.64            | 4.84            | 7.45             | 11.59          | 13.78           |
| 14               | 212.35                | 2.89             | 4.54          | 0.07            | 0.56             | 2.12           | 10.71             | 3.69            | 4.13            | 6.62             | 11.63          | 13.38           |
| 17               | 172.56                | 2.78             | 4.39          | 0.18            | 0.87             | 2.69           | 14.49             | 2.95            | 4.47            | 6.58             | 15.18          | 16.55           |
| 20               | 81.55                 | 2.45             | 1.38          | 0.08            | 0.94             | 1.80           | 9.65              | 1.89            | 4.77            | 6.21             | 9.64           | 11.47           |
| 23               | 27.40                 | 2.39             | 0.59          | 0.02            | 1.65             | 0.57           | 3.78              | 0.89            | 7.45            | 8.16             | 3.62           | 8.93            |
| 26               | 11.46                 | 2.46             | 0.19          | 0.07            | 0.87             | 0.11           | 1.07              | 0.37            | 6.74            | 7.27             | 0.85           | 7.32            |
| 29               | 5.68                  | 2.06             | 0.49          | 0.03            | 1.79             | 0.05           | 0.83              | 0.25            | 9.23            | 9.65             | 0.68           | 9.68            |
| 32               | 4.20                  | 1.70             | 0.43          | 0.09            | 1.81             | 0.06           | 0.52              | 0.20            | 9.81            | 10.14            | 0.46           | 10.15           |
| 35               | 0.37                  | 1.68             | 0.16          | 0.08            | 2.30             | 0.12           | 0.79              | 0.16            | 11.47           | 11.83            | 0.64           | 11.85           |
| 38               | 2.59                  | 1.28             | 0.15          | 0.03            | 2.42             | 0.08           | 1.57              | 0.15            | 13.00           | 13.30            | 1.50           | 13.38           |
| 41               | 4.02                  | 1.66             | 0.34          | 0.03            | 2.90             | 0.15           | 2.02              | 0.16            | 14.53           | 14.92            | 1.97           | 15.05           |

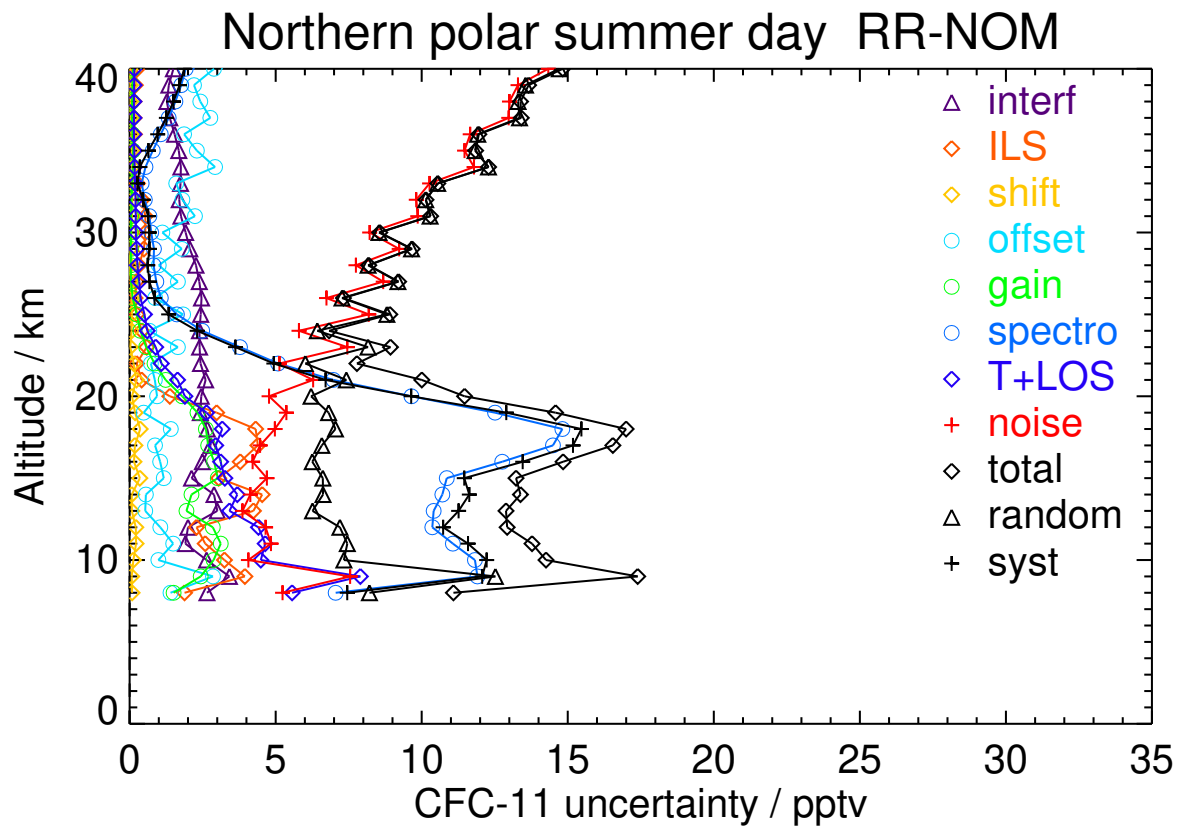

**Figure S39.** V8R\_F-11\_261 Northern polar summer day

**Table S41.** CFC-11 error budget for Northern polar summer night. All uncertainties are  $1\sigma$ .

| altitude<br>(km) | mean target<br>(pptv) | interf<br>(pptv) | ILS<br>(pptv) | shift<br>(pptv) | offset<br>(pptv) | gain<br>(pptv) | spectro<br>(pptv) | T+LOS<br>(pptv) | noise<br>(pptv) | random<br>(pptv) | syst<br>(pptv) | total<br>(pptv) |
|------------------|-----------------------|------------------|---------------|-----------------|------------------|----------------|-------------------|-----------------|-----------------|------------------|----------------|-----------------|
| 14               | 216.28                | 2.43             | 4.05          | 0.08            | 1.88             | 2.45           | 12.19             | 4.28            | 5.41            | 7.77             | 12.95          | 15.10           |
| 17               | 167.47                | 2.71             | 3.07          | 0.13            | 0.51             | 2.71           | 13.83             | 3.39            | 5.27            | 7.06             | 14.32          | 15.97           |
| 20               | 82.39                 | 2.42             | 2.02          | 0.07            | 0.63             | 1.91           | 10.17             | 2.31            | 5.46            | 6.68             | 10.40          | 12.35           |
| 23               | 21.97                 | 2.37             | 0.43          | 0.04            | 1.51             | 0.51           | 3.47              | 0.81            | 7.34            | 7.95             | 3.41           | 8.65            |
| 26               | 6.76                  | 2.45             | 0.14          | 0.04            | 1.25             | 0.09           | 0.90              | 0.38            | 7.49            | 8.02             | 0.69           | 8.04            |
| 29               | 2.43                  | 2.16             | 0.27          | 0.04            | 1.60             | 0.04           | 0.62              | 0.21            | 9.37            | 9.77             | 0.28           | 9.78            |
| 32               | 5.59                  | 1.51             | 0.33          | 0.09            | 2.06             | 0.09           | 0.69              | 0.17            | 10.36           | 10.69            | 0.37           | 10.70           |
| 35               | 5.72                  | 1.26             | 0.17          | 0.08            | 2.64             | 0.10           | 0.76              | 0.16            | 12.39           | 12.74            | 0.57           | 12.75           |
| 38               | -0.38                 | 1.28             | 0.16          | 0.03            | 2.81             | 0.06           | 1.55              | 0.16            | 13.98           | 14.33            | 1.49           | 14.41           |
| 41               | 2.25                  | 1.22             | 0.25          | 0.02            | 3.17             | 0.08           | 1.99              | 0.17            | 15.49           | 15.87            | 1.97           | 15.99           |

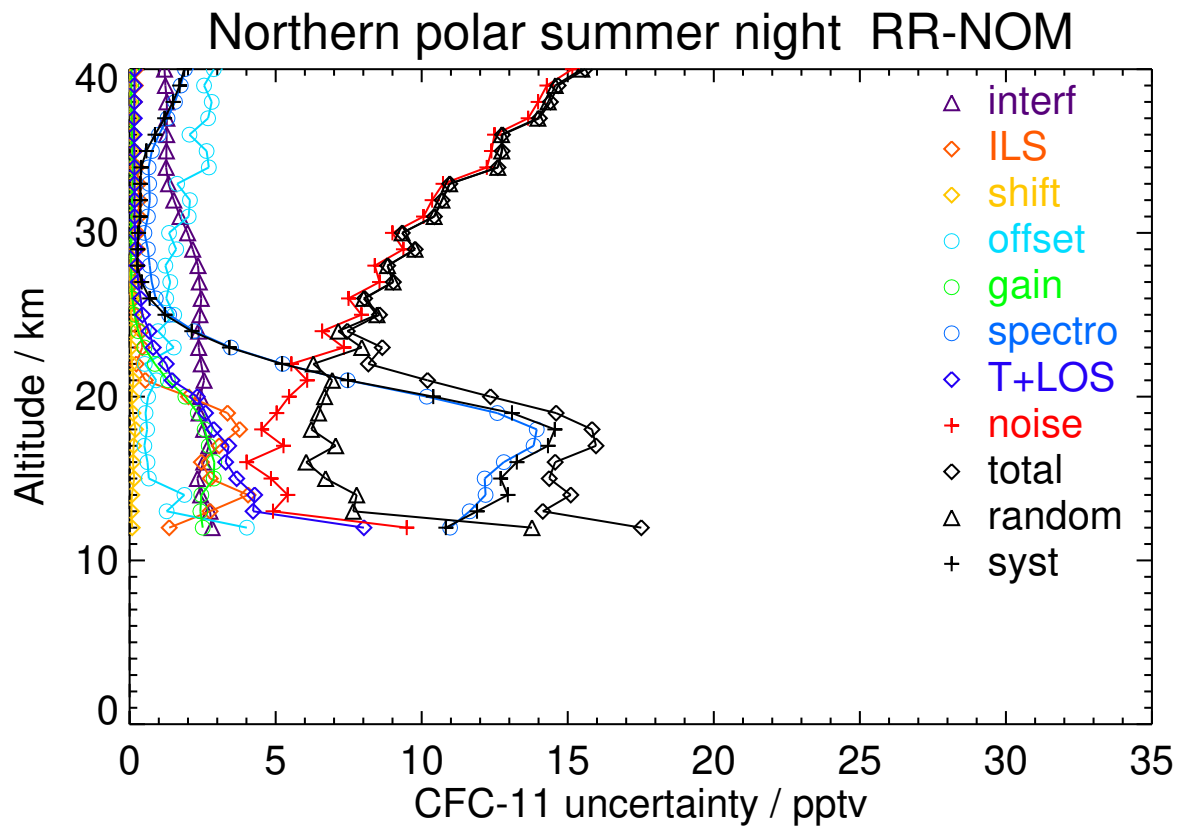

**Figure S40.** V8R\_F-11\_261 Northern polar summer night

**Table S42.** CFC-11 error budget for Northern polar autumn day. All uncertainties are  $1\sigma$ .

| altitude<br>(km) | mean target<br>(pptv) | interf<br>(pptv) | ILS<br>(pptv) | shift<br>(pptv) | offset<br>(pptv) | gain<br>(pptv) | spectro<br>(pptv) | T+LOS<br>(pptv) | noise<br>(pptv) | random<br>(pptv) | syst<br>(pptv) | total<br>(pptv) |
|------------------|-----------------------|------------------|---------------|-----------------|------------------|----------------|-------------------|-----------------|-----------------|------------------|----------------|-----------------|
| 8                | 267.07                | 3.28             | 1.71          | 0.39            | 3.17             | 2.46           | 15.15             | 8.64            | 8.24            | 12.79            | 15.44          | 20.05           |
| 11               | 227.08                | 2.78             | 2.56          | 0.22            | 3.27             | 2.60           | 12.05             | 7.43            | 8.43            | 12.81            | 11.79          | 17.41           |
| 14               | 208.03                | 2.31             | 5.01          | 0.31            | 0.85             | 2.57           | 14.73             | 4.42            | 5.03            | 7.51             | 15.60          | 17.31           |
| 17               | 124.01                | 2.50             | 3.28          | 0.18            | 0.95             | 2.22           | 13.87             | 3.22            | 5.24            | 7.10             | 14.23          | 15.90           |
| 20               | 44.22                 | 2.48             | 1.82          | 0.16            | 0.82             | 1.10           | 7.37              | 1.88            | 6.29            | 7.83             | 6.89           | 10.43           |
| 23               | 12.88                 | 2.36             | 0.25          | 0.05            | 1.39             | 0.28           | 2.38              | 0.61            | 7.72            | 8.34             | 1.90           | 8.56            |
| 26               | 5.26                  | 2.40             | 0.17          | 0.02            | 1.54             | 0.10           | 1.08              | 0.34            | 8.90            | 9.38             | 0.78           | 9.41            |
| 29               | 10.72                 | 2.01             | 0.22          | 0.05            | 1.72             | 0.13           | 1.07              | 0.25            | 10.60           | 10.96            | 0.69           | 10.98           |
| 32               | 7.81                  | 1.53             | 0.25          | 0.06            | 2.34             | 0.10           | 0.78              | 0.21            | 12.49           | 12.82            | 0.37           | 12.83           |
| 35               | 3.38                  | 1.22             | 0.12          | 0.04            | 3.05             | 0.08           | 1.23              | 0.16            | 15.00           | 15.37            | 1.08           | 15.41           |
| 38               | 2.45                  | 1.15             | 0.16          | 0.02            | 3.98             | 0.08           | 1.94              | 0.18            | 16.84           | 17.36            | 1.86           | 17.46           |
| 41               | 0.96                  | 1.28             | 0.25          | 0.02            | 6.31             | 0.08           | 2.41              | 0.20            | 18.46           | 19.56            | 2.36           | 19.70           |

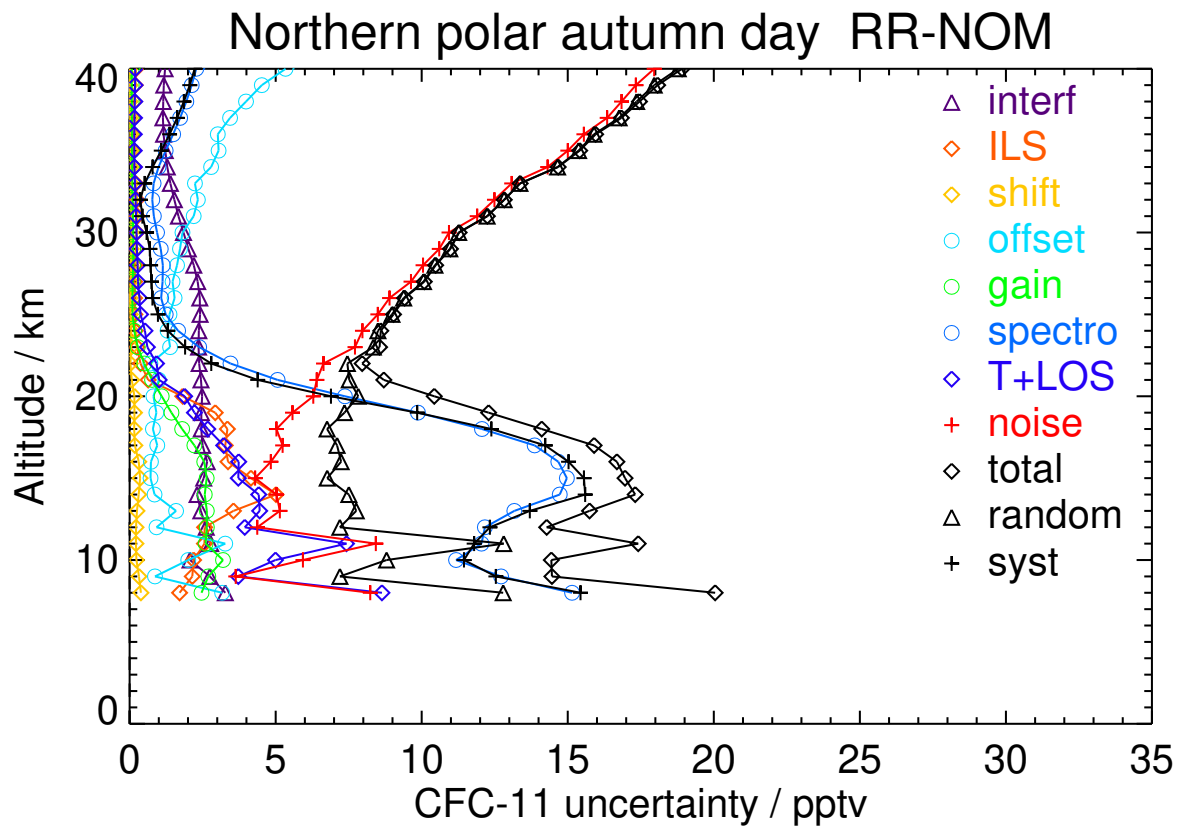

**Figure S41.** V8R\_F-11\_261 Northern polar autumn day

**Table S43.** CFC-11 error budget for Northern polar autumn night. All uncertainties are  $1\sigma$ .

| altitude<br>(km) | mean target<br>(pptv) | interf<br>(pptv) | ILS<br>(pptv) | shift<br>(pptv) | offset<br>(pptv) | gain<br>(pptv) | spectro<br>(pptv) | T+LOS<br>(pptv) | noise<br>(pptv) | random<br>(pptv) | syst<br>(pptv) | total<br>(pptv) |
|------------------|-----------------------|------------------|---------------|-----------------|------------------|----------------|-------------------|-----------------|-----------------|------------------|----------------|-----------------|
| 8                | 250.69                | 2.88             | 1.83          | 0.22            | 2.85             | 2.51           | 12.72             | 7.80            | 7.32            | 11.45            | 13.08          | 17.39           |
| 11               | 225.92                | 2.83             | 2.77          | 0.23            | 3.28             | 2.73           | 12.56             | 7.20            | 8.13            | 12.19            | 12.69          | 17.60           |
| 14               | 203.15                | 2.35             | 5.24          | 0.35            | 0.86             | 2.71           | 14.60             | 4.32            | 4.89            | 7.48             | 15.53          | 17.24           |
| 17               | 113.95                | 2.51             | 3.20          | 0.20            | 0.83             | 2.35           | 13.38             | 3.09            | 5.23            | 7.12             | 13.72          | 15.45           |
| 20               | 42.58                 | 2.45             | 1.53          | 0.15            | 0.75             | 1.10           | 6.72              | 1.73            | 6.22            | 7.76             | 6.07           | 9.85            |
| 23               | 10.75                 | 2.37             | 0.33          | 0.05            | 1.45             | 0.32           | 2.38              | 0.59            | 7.80            | 8.49             | 1.64           | 8.65            |
| 26               | 10.99                 | 2.39             | 0.21          | 0.02            | 1.52             | 0.12           | 1.25              | 0.35            | 8.87            | 9.36             | 0.91           | 9.40            |
| 29               | 4.80                  | 2.04             | 0.40          | 0.08            | 1.75             | 0.11           | 1.17              | 0.30            | 10.63           | 10.99            | 0.97           | 11.04           |
| 32               | -2.53                 | 1.53             | 0.19          | 0.05            | 2.33             | 0.07           | 0.67              | 0.18            | 12.34           | 12.66            | 0.48           | 12.67           |
| 35               | 3.74                  | 1.20             | 0.13          | 0.03            | 3.01             | 0.09           | 1.40              | 0.16            | 14.84           | 15.20            | 1.27           | 15.25           |
| 38               | 3.90                  | 1.11             | 0.21          | 0.01            | 3.83             | 0.10           | 1.90              | 0.18            | 16.74           | 17.22            | 1.81           | 17.31           |
| 41               | 1.20                  | 1.24             | 0.29          | 0.01            | 5.99             | 0.09           | 2.29              | 0.20            | 18.36           | 19.36            | 2.24           | 19.49           |

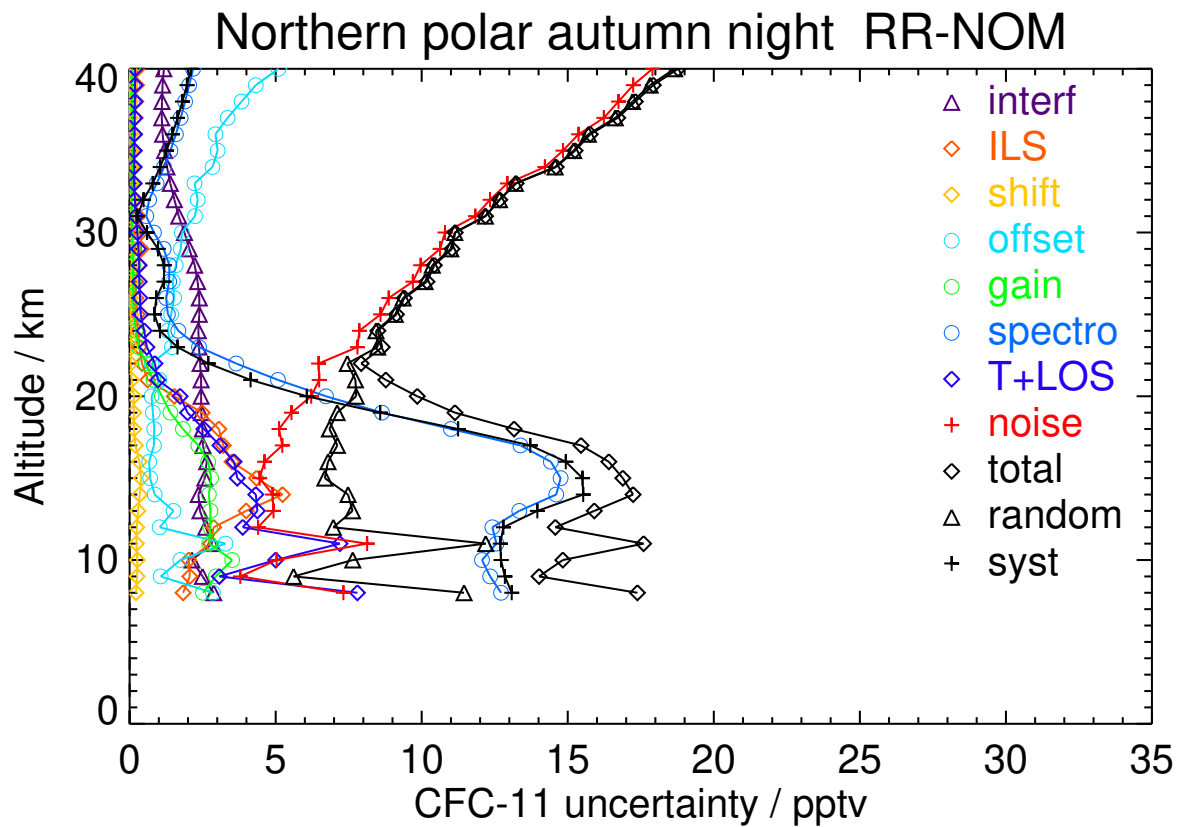

**Figure S42.** V8R\_F-11\_261 Northern polar autumn night

**Table S44.** CFC-11 error budget for Northern midlatitude winter day. All uncertainties are  $1\sigma$ .

| altitude<br>(km) | mean target<br>(pptv) | interf<br>(pptv) | ILS<br>(pptv) | shift<br>(pptv) | offset<br>(pptv) | gain<br>(pptv) | spectro<br>(pptv) | T+LOS<br>(pptv) | noise<br>(pptv) | random<br>(pptv) | syst<br>(pptv) | total<br>(pptv) |
|------------------|-----------------------|------------------|---------------|-----------------|------------------|----------------|-------------------|-----------------|-----------------|------------------|----------------|-----------------|
| 8                | 252.25                | 2.54             | 1.84          | 0.19            | 1.45             | 3.10           | 11.72             | 5.66            | 4.89            | 8.89             | 11.66          | 14.66           |
| 11               | 234.08                | 2.76             | 2.96          | 0.22            | 1.53             | 2.91           | 12.20             | 4.58            | 4.66            | 8.04             | 12.42          | 14.79           |
| 14               | 191.87                | 2.38             | 4.43          | 0.27            | 1.51             | 2.64           | 12.33             | 3.75            | 4.53            | 7.41             | 12.90          | 14.88           |
| 17               | 151.95                | 2.56             | 2.95          | 0.13            | 1.04             | 2.41           | 13.28             | 2.98            | 5.10            | 7.58             | 13.26          | 15.28           |
| 20               | 65.63                 | 2.49             | 2.18          | 0.20            | 0.97             | 1.37           | 8.02              | 1.91            | 5.87            | 7.57             | 7.68           | 10.78           |
| 23               | 41.10                 | 2.49             | 0.87          | 0.06            | 0.85             | 0.55           | 4.47              | 0.90            | 6.95            | 7.95             | 3.74           | 8.79            |
| 26               | 11.21                 | 2.41             | 0.39          | 0.03            | 1.18             | 0.18           | 1.70              | 0.43            | 7.72            | 8.25             | 1.42           | 8.37            |
| 29               | 9.64                  | 2.38             | 0.49          | 0.08            | 1.51             | 0.09           | 1.12              | 0.26            | 9.40            | 9.87             | 0.59           | 9.89            |
| 32               | 11.20                 | 1.68             | 0.39          | 0.10            | 2.04             | 0.09           | 0.90              | 0.20            | 10.45           | 10.82            | 0.45           | 10.83           |
| 35               | 8.06                  | 1.44             | 0.16          | 0.05            | 2.66             | 0.11           | 1.12              | 0.17            | 12.69           | 13.07            | 0.84           | 13.10           |
| 38               | 2.90                  | 1.44             | 0.13          | 0.02            | 3.00             | 0.10           | 1.74              | 0.16            | 14.60           | 14.99            | 1.62           | 15.08           |
| 41               | 0.19                  | 1.54             | 0.19          | 0.02            | 4.26             | 0.11           | 2.12              | 0.17            | 16.27           | 16.90            | 2.06           | 17.03           |

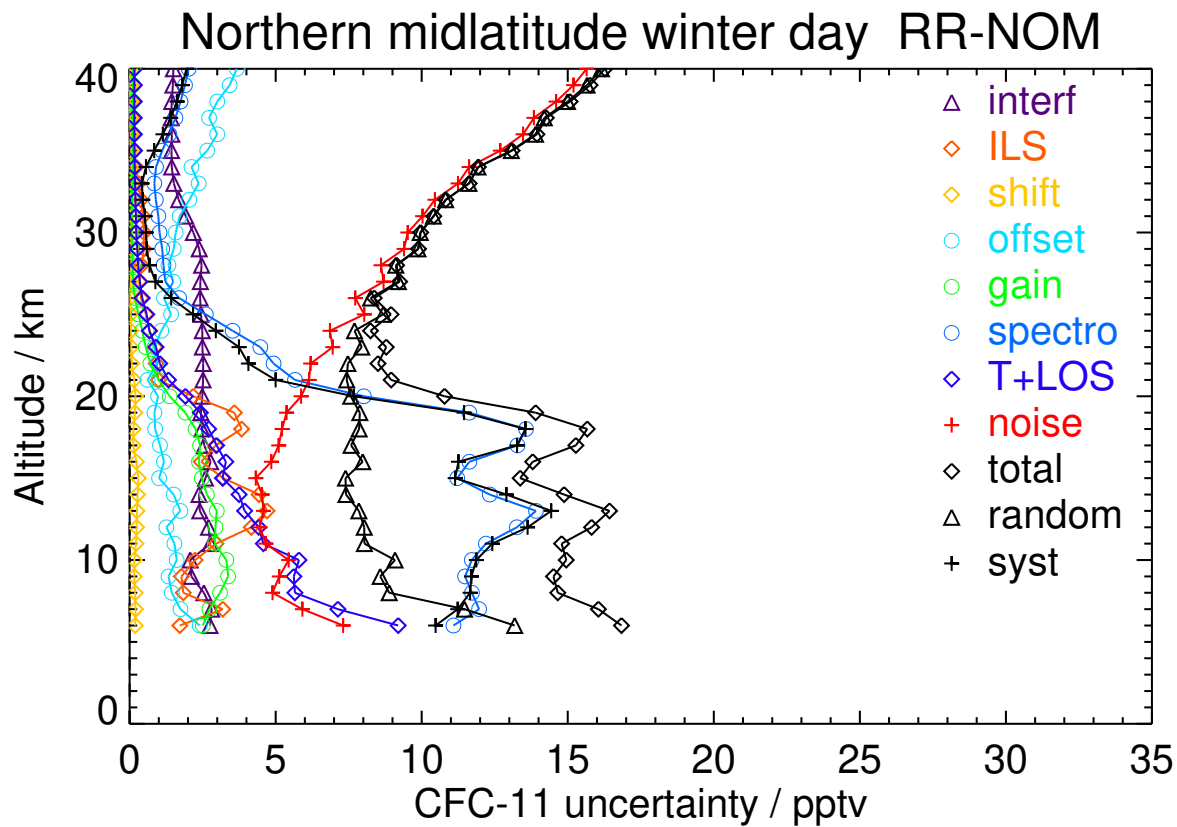

**Figure S43.** V8R\_F-11\_261 Northern midlatitude winter day

**Table S45.** CFC-11 error budget for Northern midlatitude winter night. All uncertainties are  $1\sigma$ .

| altitude<br>(km) | mean target<br>(pptv) | interf<br>(pptv) | ILS<br>(pptv) | shift<br>(pptv) | offset<br>(pptv) | gain<br>(pptv) | spectro<br>(pptv) | T+LOS<br>(pptv) | noise<br>(pptv) | random<br>(pptv) | syst<br>(pptv) | total<br>(pptv) |
|------------------|-----------------------|------------------|---------------|-----------------|------------------|----------------|-------------------|-----------------|-----------------|------------------|----------------|-----------------|
| 8                | 247.58                | 2.68             | 1.18          | 0.24            | 1.55             | 3.11           | 11.24             | 5.66            | 4.91            | 8.52             | 11.43          | 14.26           |
| 11               | 231.18                | 2.87             | 2.84          | 0.22            | 0.91             | 2.92           | 12.62             | 4.44            | 4.29            | 7.48             | 12.92          | 14.93           |
| 14               | 208.49                | 2.49             | 4.02          | 0.25            | 1.33             | 2.57           | 11.86             | 3.73            | 4.47            | 7.33             | 12.31          | 14.33           |
| 17               | 158.02                | 2.48             | 3.26          | 0.16            | 1.22             | 2.68           | 14.29             | 3.31            | 5.22            | 8.02             | 14.27          | 16.37           |
| 20               | 75.60                 | 2.44             | 2.58          | 0.20            | 0.94             | 1.46           | 8.94              | 2.03            | 5.93            | 8.15             | 8.27           | 11.61           |
| 23               | 38.38                 | 2.49             | 0.72          | 0.07            | 0.86             | 0.48           | 4.36              | 0.92            | 7.01            | 7.84             | 3.91           | 8.76            |
| 26               | 15.43                 | 2.41             | 0.45          | 0.03            | 1.23             | 0.19           | 1.96              | 0.43            | 7.79            | 8.35             | 1.56           | 8.50            |
| 29               | 9.86                  | 2.39             | 0.42          | 0.07            | 1.51             | 0.07           | 0.92              | 0.26            | 9.55            | 9.99             | 0.67           | 10.01           |
| 32               | 12.81                 | 1.73             | 0.43          | 0.10            | 2.00             | 0.08           | 0.91              | 0.20            | 10.37           | 10.73            | 0.53           | 10.75           |
| 35               | 8.82                  | 1.56             | 0.19          | 0.06            | 2.62             | 0.09           | 0.98              | 0.17            | 12.57           | 12.95            | 0.75           | 12.97           |
| 38               | 3.73                  | 1.62             | 0.19          | 0.02            | 2.95             | 0.16           | 1.71              | 0.16            | 14.29           | 14.70            | 1.62           | 14.78           |
| 41               | 3.92                  | 1.73             | 0.24          | 0.02            | 3.98             | 0.16           | 2.13              | 0.18            | 15.82           | 16.41            | 2.08           | 16.54           |

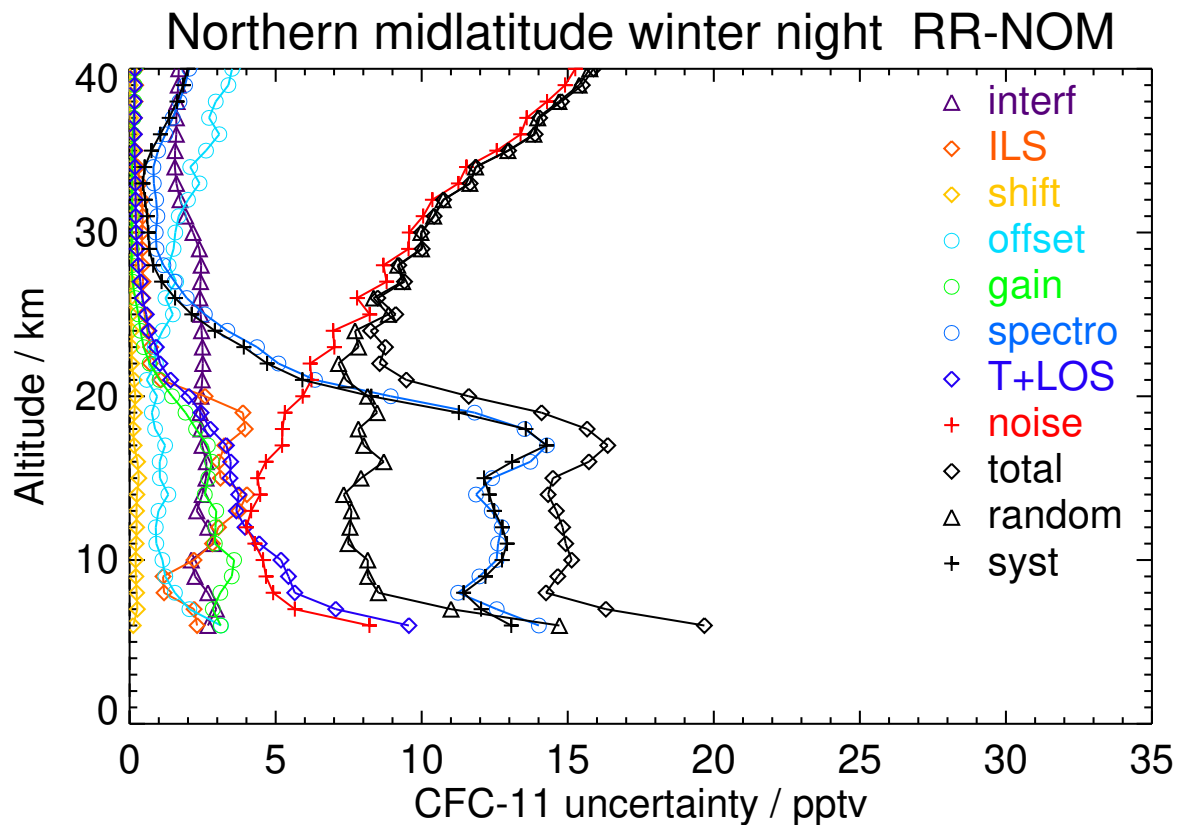

**Figure S44.** V8R\_F-11\_261 Northern midlatitude winter night

**Table S46.** CFC-11 error budget for Northern midlatitude spring day. All uncertainties are  $1\sigma$ .

| altitude<br>(km) | mean target<br>(pptv) | interf<br>(pptv) | ILS<br>(pptv) | shift<br>(pptv) | offset<br>(pptv) | gain<br>(pptv) | spectro<br>(pptv) | T+LOS<br>(pptv) | noise<br>(pptv) | random<br>(pptv) | syst<br>(pptv) | total<br>(pptv) |
|------------------|-----------------------|------------------|---------------|-----------------|------------------|----------------|-------------------|-----------------|-----------------|------------------|----------------|-----------------|
| 8                | 249.27                | 3.13             | 1.82          | 0.17            | 1.86             | 2.83           | 11.26             | 7.25            | 6.26            | 11.18            | 10.87          | 15.59           |
| 11               | 217.54                | 2.16             | 2.66          | 0.19            | 1.33             | 3.33           | 11.63             | 4.92            | 5.04            | 8.24             | 11.90          | 14.48           |
| 14               | 207.10                | 2.34             | 3.94          | 0.23            | 1.21             | 2.79           | 12.32             | 3.56            | 4.44            | 7.20             | 12.76          | 14.65           |
| 17               | 160.67                | 2.67             | 3.05          | 0.07            | 0.97             | 2.45           | 13.19             | 3.08            | 5.06            | 7.43             | 13.32          | 15.25           |
| 20               | 81.64                 | 2.43             | 2.26          | 0.20            | 0.82             | 1.76           | 10.36             | 2.00            | 5.92            | 7.87             | 9.96           | 12.70           |
| 23               | 29.35                 | 2.42             | 0.63          | 0.08            | 0.84             | 0.52           | 4.44              | 0.90            | 6.73            | 7.60             | 3.91           | 8.54            |
| 26               | 10.38                 | 2.46             | 0.36          | 0.03            | 1.34             | 0.18           | 1.76              | 0.41            | 8.51            | 9.02             | 1.51           | 9.15            |
| 29               | 1.60                  | 2.25             | 0.36          | 0.06            | 1.42             | 0.08           | 0.72              | 0.22            | 9.57            | 9.96             | 0.37           | 9.97            |
| 32               | 5.26                  | 1.65             | 0.30          | 0.07            | 2.07             | 0.08           | 0.66              | 0.15            | 11.14           | 11.46            | 0.50           | 11.47           |
| 35               | 7.61                  | 1.45             | 0.14          | 0.05            | 2.70             | 0.10           | 1.34              | 0.15            | 13.20           | 13.57            | 1.17           | 13.62           |
| 38               | 8.79                  | 1.55             | 0.18          | 0.02            | 3.05             | 0.11           | 1.96              | 0.16            | 14.80           | 15.20            | 1.88           | 15.32           |
| 41               | 11.73                 | 1.69             | 0.29          | 0.02            | 4.01             | 0.17           | 2.16              | 0.17            | 16.21           | 16.79            | 2.11           | 16.93           |

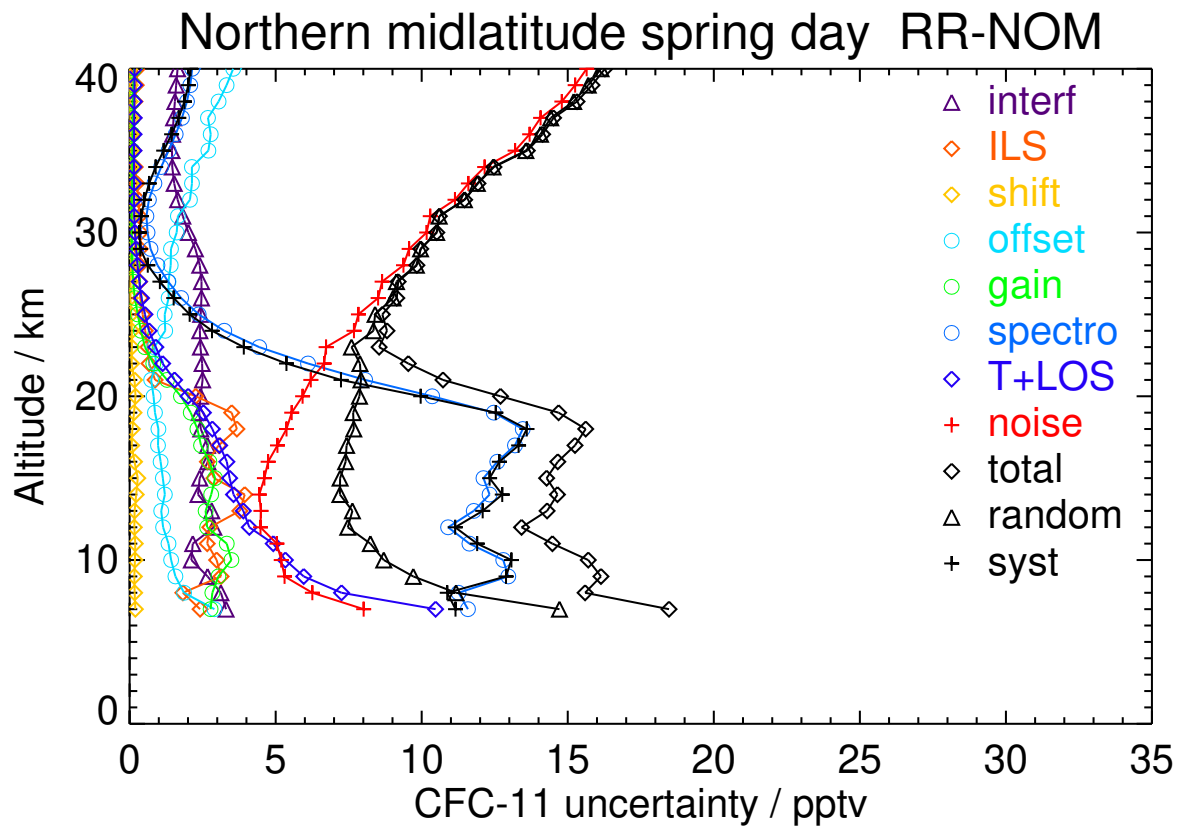

**Figure S45.** V8R\_F-11\_261 Northern midlatitude spring day

**Table S47.** CFC-11 error budget for Northern midlatitude spring night. All uncertainties are  $1\sigma$ .

| altitude<br>(km) | mean target<br>(pptv) | interf<br>(pptv) | ILS<br>(pptv) | shift<br>(pptv) | offset<br>(pptv) | gain<br>(pptv) | spectro<br>(pptv) | T+LOS<br>(pptv) | noise<br>(pptv) | random<br>(pptv) | syst<br>(pptv) | total<br>(pptv) |
|------------------|-----------------------|------------------|---------------|-----------------|------------------|----------------|-------------------|-----------------|-----------------|------------------|----------------|-----------------|
| 8                | 246.71                | 3.09             | 2.58          | 0.23            | 2.13             | 2.82           | 12.31             | 7.60            | 6.30            | 11.51            | 12.05          | 16.67           |
| 11               | 219.95                | 2.14             | 2.76          | 0.19            | 0.98             | 3.17           | 11.55             | 4.52            | 4.38            | 7.72             | 11.69          | 14.01           |
| 14               | 200.41                | 2.28             | 4.52          | 0.25            | 0.88             | 2.94           | 12.96             | 3.53            | 4.25            | 6.83             | 13.67          | 15.28           |
| 17               | 141.64                | 2.58             | 2.91          | 0.07            | 0.91             | 2.24           | 12.37             | 2.88            | 4.92            | 7.22             | 12.43          | 14.38           |
| 20               | 74.91                 | 2.49             | 1.59          | 0.20            | 0.74             | 1.56           | 8.81              | 1.77            | 5.80            | 7.50             | 8.36           | 11.23           |
| 23               | 28.41                 | 2.43             | 0.62          | 0.09            | 0.87             | 0.55           | 4.02              | 0.81            | 6.76            | 7.56             | 3.58           | 8.36            |
| 26               | 14.22                 | 2.47             | 0.34          | 0.02            | 1.33             | 0.17           | 1.58              | 0.39            | 8.34            | 8.85             | 1.33           | 8.95            |
| 29               | 2.45                  | 2.21             | 0.49          | 0.07            | 1.47             | 0.06           | 0.88              | 0.24            | 9.64            | 10.03            | 0.64           | 10.05           |
| 32               | 3.65                  | 1.60             | 0.34          | 0.08            | 1.99             | 0.08           | 0.78              | 0.17            | 11.01           | 11.33            | 0.43           | 11.34           |
| 35               | 5.71                  | 1.42             | 0.14          | 0.05            | 2.57             | 0.09           | 1.20              | 0.15            | 13.04           | 13.38            | 1.09           | 13.43           |
| 38               | 3.09                  | 1.46             | 0.17          | 0.02            | 2.92             | 0.09           | 1.84              | 0.16            | 14.80           | 15.17            | 1.75           | 15.27           |
| 41               | 5.33                  | 1.69             | 0.29          | 0.02            | 3.99             | 0.14           | 2.19              | 0.18            | 16.24           | 16.82            | 2.13           | 16.95           |

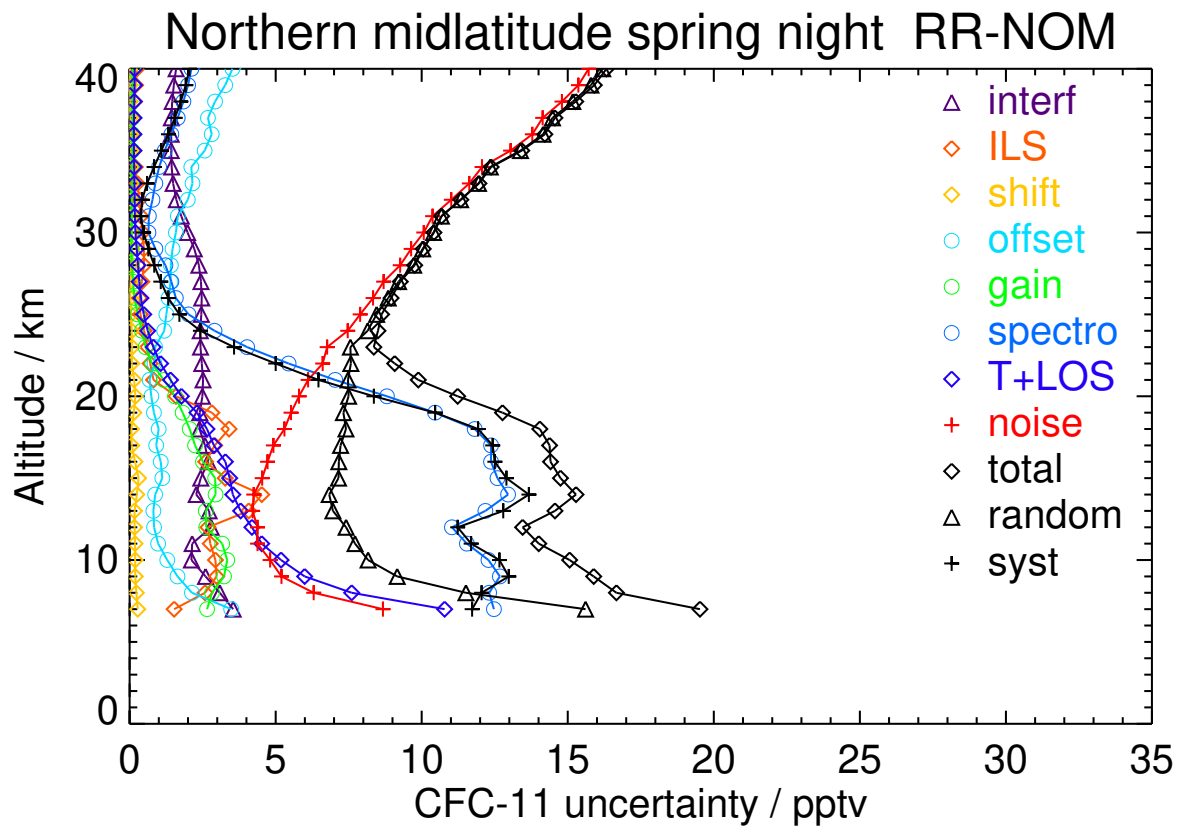

**Figure S46.** V8R\_F-11\_261 Northern midlatitude spring night

**Table S48.** CFC-11 error budget for Northern midlatitude summer day. All uncertainties are  $1\sigma$ .

| altitude<br>(km) | mean target<br>(pptv) | interf<br>(pptv) | ILS<br>(pptv) | shift<br>(pptv) | offset<br>(pptv) | gain<br>(pptv) | spectro<br>(pptv) | T+LOS<br>(pptv) | noise<br>(pptv) | random<br>(pptv) | syst<br>(pptv) | total<br>(pptv) |
|------------------|-----------------------|------------------|---------------|-----------------|------------------|----------------|-------------------|-----------------|-----------------|------------------|----------------|-----------------|
| 8                | 239.99                | 2.94             | 0.94          | 0.13            | 2.62             | 2.03           | 10.01             | 7.91            | 7.21            | 12.24            | 9.25           | 15.34           |
| 11               | 245.11                | 1.94             | 1.30          | 0.15            | 1.48             | 3.78           | 9.49              | 4.98            | 5.02            | 7.80             | 10.06          | 12.73           |
| 14               | 249.15                | 2.25             | 2.28          | 0.23            | 1.50             | 3.58           | 11.06             | 3.74            | 4.87            | 6.99             | 11.69          | 13.62           |
| 17               | 236.39                | 2.66             | 1.90          | 0.08            | 1.20             | 3.64           | 13.39             | 3.97            | 5.52            | 7.67             | 13.86          | 15.84           |
| 20               | 152.74                | 2.33             | 4.74          | 0.31            | 1.12             | 2.83           | 16.43             | 3.04            | 6.12            | 7.54             | 17.24          | 18.81           |
| 23               | 49.04                 | 2.58             | 1.29          | 0.07            | 0.80             | 0.80           | 7.88              | 1.54            | 7.11            | 8.00             | 7.79           | 11.17           |
| 26               | 11.87                 | 2.44             | 0.65          | 0.03            | 1.01             | 0.14           | 2.16              | 0.52            | 7.44            | 8.00             | 1.92           | 8.23            |
| 29               | 5.79                  | 2.46             | 0.41          | 0.06            | 1.36             | 0.12           | 0.86              | 0.26            | 9.26            | 9.72             | 0.36           | 9.73            |
| 32               | 4.02                  | 1.63             | 0.25          | 0.07            | 1.89             | 0.05           | 0.71              | 0.16            | 10.20           | 10.53            | 0.38           | 10.53           |
| 35               | 3.16                  | 1.28             | 0.12          | 0.06            | 2.51             | 0.07           | 1.15              | 0.14            | 12.40           | 12.73            | 1.03           | 12.77           |
| 38               | 6.40                  | 1.43             | 0.16          | 0.03            | 2.71             | 0.12           | 1.77              | 0.17            | 14.01           | 14.35            | 1.71           | 14.45           |
| 41               | 2.74                  | 1.44             | 0.23          | 0.02            | 3.34             | 0.13           | 2.09              | 0.19            | 15.51           | 15.94            | 2.05           | 16.08           |

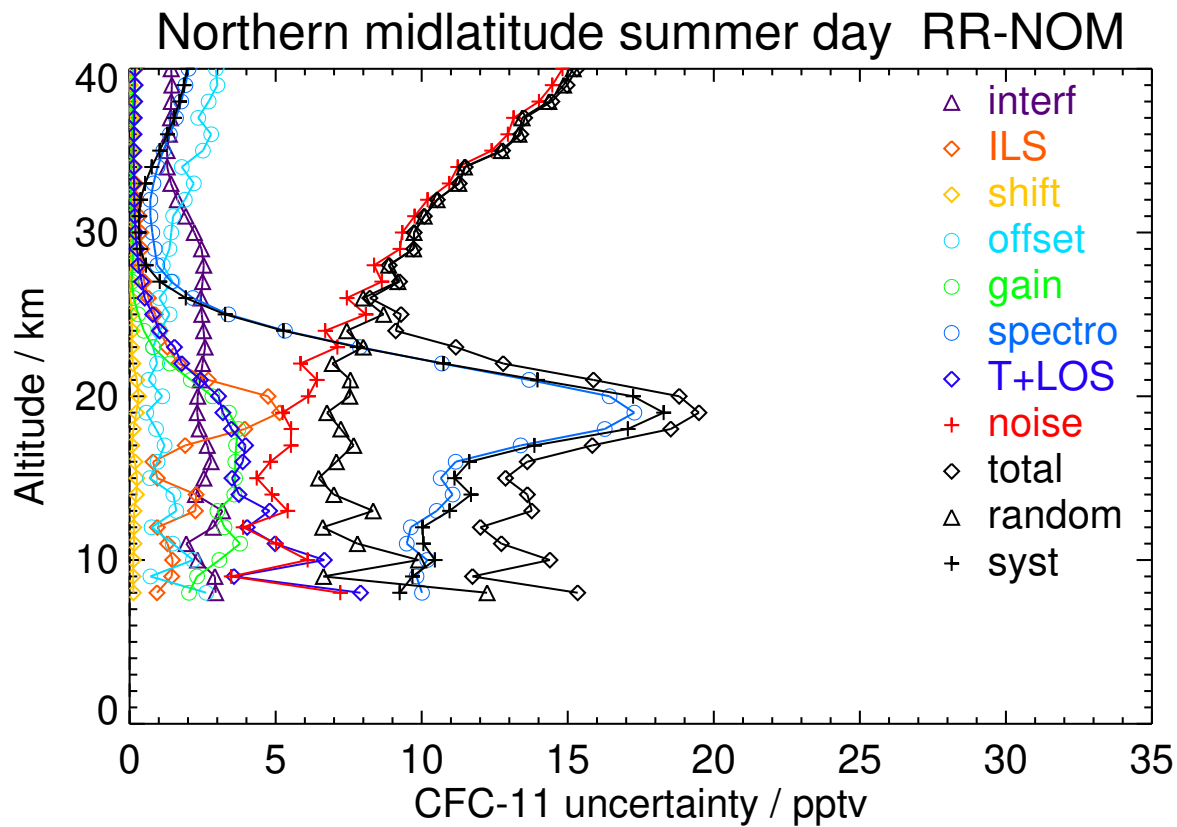

**Figure S47.** V8R\_F-11\_261 Northern midlatitude summer day

**Table S49.** CFC-11 error budget for Northern midlatitude summer night. All uncertainties are  $1\sigma$ .

| altitude<br>(km) | mean target<br>(pptv) | interf<br>(pptv) | ILS<br>(pptv) | shift<br>(pptv) | offset<br>(pptv) | gain<br>(pptv) | spectro<br>(pptv) | T+LOS<br>(pptv) | noise<br>(pptv) | random<br>(pptv) | syst<br>(pptv) | total<br>(pptv) |
|------------------|-----------------------|------------------|---------------|-----------------|------------------|----------------|-------------------|-----------------|-----------------|------------------|----------------|-----------------|
| 8                | 256.97                | 3.39             | 1.29          | 0.12            | 3.08             | 2.57           | 11.30             | 8.56            | 7.32            | 12.30            | 11.51          | 16.85           |
| 11               | 248.37                | 2.32             | 1.06          | 0.15            | 1.53             | 3.06           | 10.17             | 4.86            | 4.98            | 7.80             | 10.45          | 13.04           |
| 14               | 245.15                | 2.63             | 2.96          | 0.22            | 0.81             | 3.16           | 11.17             | 4.15            | 4.72            | 7.14             | 11.82          | 13.81           |
| 17               | 223.63                | 2.42             | 2.18          | 0.05            | 0.94             | 3.19           | 13.09             | 3.69            | 5.13            | 7.22             | 13.45          | 15.27           |
| 20               | 146.48                | 2.38             | 3.91          | 0.27            | 0.97             | 2.34           | 14.92             | 2.80            | 5.86            | 7.40             | 15.41          | 17.09           |
| 23               | 53.35                 | 2.58             | 1.32          | 0.09            | 0.80             | 0.80           | 7.97              | 1.50            | 6.75            | 7.61             | 7.95           | 11.00           |
| 26               | 8.20                  | 2.43             | 0.63          | 0.05            | 1.17             | 0.11           | 2.18              | 0.55            | 7.72            | 8.23             | 2.14           | 8.50            |
| 29               | 4.68                  | 2.42             | 0.28          | 0.04            | 1.37             | 0.10           | 0.84              | 0.20            | 9.15            | 9.59             | 0.48           | 9.60            |
| 32               | 11.33                 | 1.61             | 0.30          | 0.07            | 1.88             | 0.08           | 0.82              | 0.16            | 10.18           | 10.51            | 0.41           | 10.52           |
| 35               | 5.24                  | 1.40             | 0.23          | 0.08            | 2.42             | 0.07           | 1.01              | 0.16            | 12.34           | 12.68            | 0.75           | 12.70           |
| 38               | 6.68                  | 1.39             | 0.20          | 0.04            | 2.65             | 0.08           | 1.78              | 0.17            | 13.99           | 14.32            | 1.67           | 14.42           |
| 41               | 8.25                  | 1.40             | 0.26          | 0.02            | 3.26             | 0.07           | 2.14              | 0.18            | 15.41           | 15.82            | 2.11           | 15.96           |

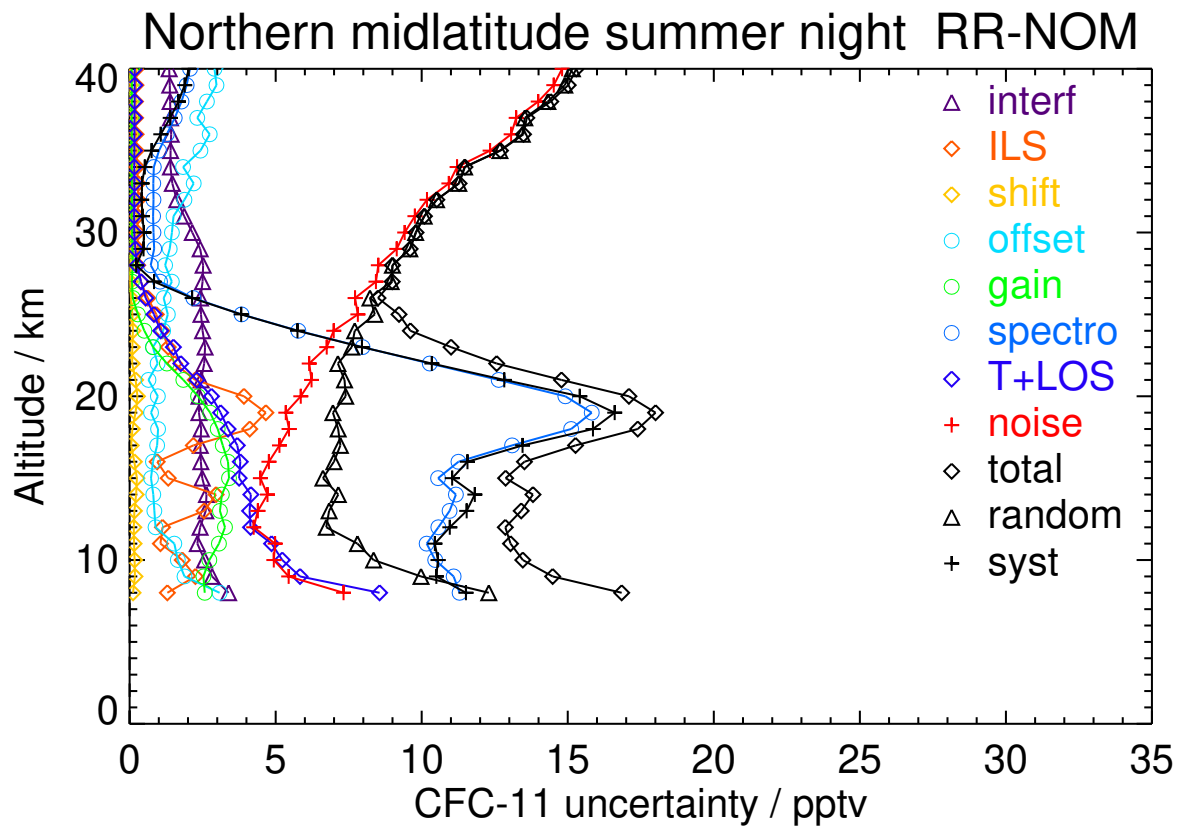

**Figure S48.** V8R\_F-11\_261 Northern midlatitude summer night

**Table S50.** CFC-11 error budget for Northern midlatitude autumn day. All uncertainties are  $1\sigma$ .

| altitude<br>(km) | mean target<br>(pptv) | interf<br>(pptv) | ILS<br>(pptv) | shift<br>(pptv) | offset<br>(pptv) | gain<br>(pptv) | spectro<br>(pptv) | T+LOS<br>(pptv) | noise<br>(pptv) | random<br>(pptv) | syst<br>(pptv) | total<br>(pptv) |
|------------------|-----------------------|------------------|---------------|-----------------|------------------|----------------|-------------------|-----------------|-----------------|------------------|----------------|-----------------|
| 8                | 239.15                | 2.82             | 2.23          | 0.19            | 2.80             | 2.08           | 10.59             | 8.40            | 7.83            | 12.94            | 10.08          | 16.40           |
| 11               | 245.31                | 2.01             | 0.82          | 0.20            | 1.02             | 3.51           | 10.32             | 4.32            | 4.77            | 7.16             | 10.72          | 12.89           |
| 14               | 247.97                | 2.64             | 2.52          | 0.27            | 1.51             | 3.12           | 11.92             | 3.93            | 4.77            | 7.18             | 12.41          | 14.34           |
| 17               | 224.29                | 2.67             | 2.37          | 0.15            | 1.21             | 3.20           | 14.03             | 3.82            | 5.55            | 7.66             | 14.42          | 16.33           |
| 20               | 140.70                | 2.37             | 4.30          | 0.36            | 1.10             | 2.54           | 15.80             | 2.93            | 6.29            | 7.81             | 16.39          | 18.16           |
| 23               | 49.64                 | 2.44             | 1.27          | 0.06            | 0.89             | 0.77           | 7.84              | 1.44            | 7.43            | 8.40             | 7.56           | 11.30           |
| 26               | 14.09                 | 2.49             | 0.60          | 0.02            | 1.06             | 0.16           | 2.49              | 0.54            | 7.74            | 8.29             | 2.33           | 8.61            |
| 29               | 5.50                  | 2.21             | 0.34          | 0.07            | 1.50             | 0.05           | 0.90              | 0.25            | 10.00           | 10.38            | 0.56           | 10.39           |
| 32               | 6.52                  | 1.68             | 0.24          | 0.08            | 1.95             | 0.05           | 0.71              | 0.18            | 11.00           | 11.32            | 0.28           | 11.33           |
| 35               | 1.05                  | 1.30             | 0.14          | 0.04            | 2.51             | 0.07           | 1.08              | 0.15            | 13.28           | 13.59            | 0.94           | 13.62           |
| 38               | 3.67                  | 1.20             | 0.22          | 0.02            | 2.92             | 0.09           | 1.83              | 0.16            | 15.20           | 15.53            | 1.77           | 15.63           |
| 41               | 5.62                  | 1.44             | 0.38          | 0.02            | 4.27             | 0.16           | 2.36              | 0.19            | 16.69           | 17.30            | 2.34           | 17.46           |

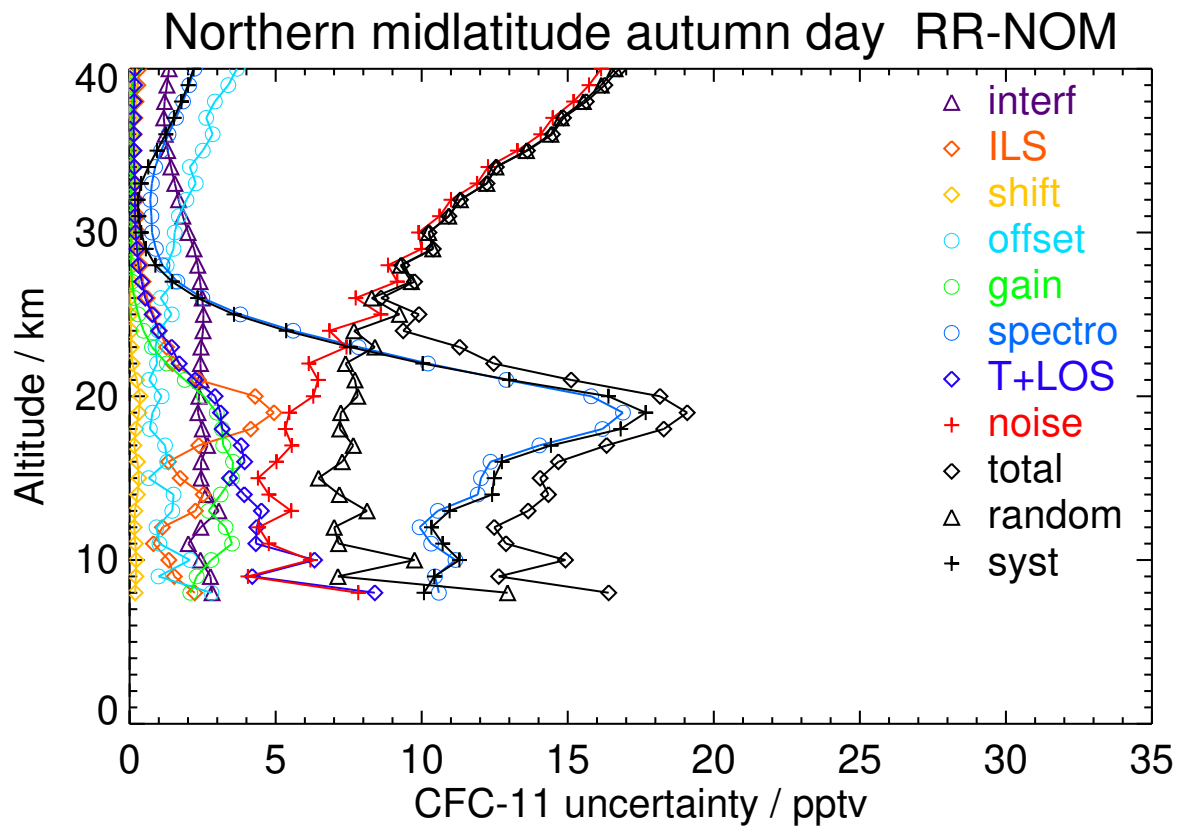

**Figure S49.** V8R\_F-11\_261 Northern midlatitude autumn day

**Table S51.** CFC-11 error budget for Northern midlatitude autumn night. All uncertainties are  $1\sigma$ .

| altitude<br>(km) | mean target<br>(pptv) | interf<br>(pptv) | ILS<br>(pptv) | shift<br>(pptv) | offset<br>(pptv) | gain<br>(pptv) | spectro<br>(pptv) | T+LOS<br>(pptv) | noise<br>(pptv) | random<br>(pptv) | syst<br>(pptv) | total<br>(pptv) |
|------------------|-----------------------|------------------|---------------|-----------------|------------------|----------------|-------------------|-----------------|-----------------|------------------|----------------|-----------------|
| 8                | 242.81                | 2.95             | 1.41          | 0.18            | 2.70             | 2.31           | 10.84             | 7.97            | 7.05            | 12.15            | 10.31          | 15.93           |
| 11               | 243.28                | 2.12             | 1.34          | 0.21            | 0.99             | 3.62           | 10.88             | 4.41            | 4.52            | 7.25             | 11.23          | 13.36           |
| 14               | 243.68                | 2.42             | 2.68          | 0.28            | 0.94             | 3.23           | 11.85             | 3.92            | 4.69            | 6.98             | 12.39          | 14.22           |
| 17               | 214.42                | 2.57             | 2.62          | 0.15            | 1.06             | 3.08           | 13.86             | 3.67            | 5.35            | 7.45             | 14.24          | 16.07           |
| 20               | 126.96                | 2.42             | 3.85          | 0.33            | 0.99             | 2.34           | 14.58             | 2.70            | 6.10            | 7.66             | 15.02          | 16.86           |
| 23               | 43.98                 | 2.44             | 1.31          | 0.06            | 0.93             | 0.75           | 7.55              | 1.35            | 7.19            | 8.39             | 7.03           | 10.94           |
| 26               | 7.94                  | 2.50             | 0.56          | 0.02            | 1.16             | 0.15           | 2.10              | 0.48            | 7.94            | 8.53             | 1.67           | 8.69            |
| 29               | 6.70                  | 2.20             | 0.35          | 0.07            | 1.51             | 0.05           | 0.87              | 0.24            | 9.86            | 10.25            | 0.56           | 10.26           |
| 32               | 3.65                  | 1.67             | 0.27          | 0.07            | 1.97             | 0.06           | 0.59              | 0.17            | 11.03           | 11.34            | 0.31           | 11.35           |
| 35               | 4.85                  | 1.27             | 0.13          | 0.04            | 2.54             | 0.05           | 1.10              | 0.13            | 13.27           | 13.58            | 1.01           | 13.62           |
| 38               | 7.23                  | 1.17             | 0.22          | 0.02            | 2.85             | 0.08           | 1.85              | 0.15            | 15.11           | 15.43            | 1.80           | 15.53           |
| 41               | 8.10                  | 1.44             | 0.38          | 0.02            | 4.12             | 0.13           | 2.29              | 0.18            | 16.54           | 17.12            | 2.27           | 17.27           |

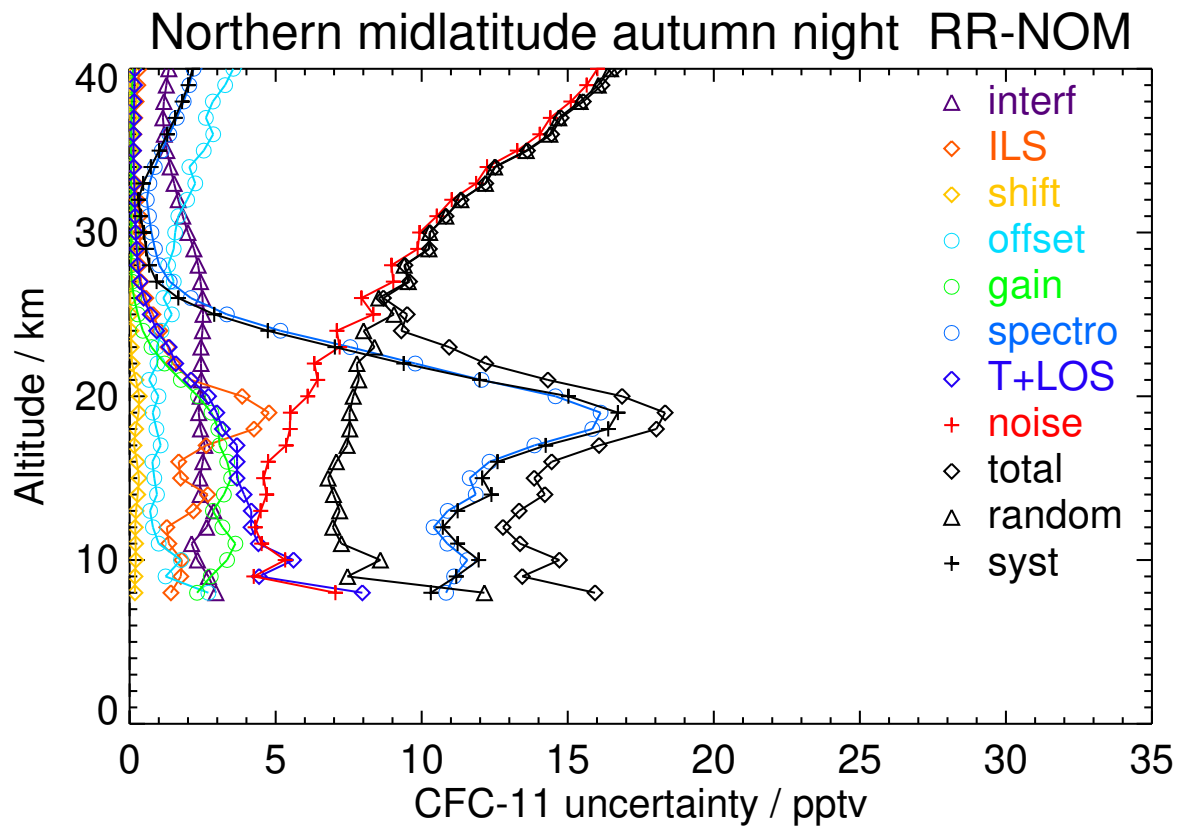

**Figure S50.** V8R\_F-11\_261 Northern midlatitude autumn night

Table S52. CFC-11 error budget for Tropics day. All uncertainties are  $1\sigma$ .

| altitude<br>(km) | mean target<br>(pptv) | interf<br>(pptv) | ILS<br>(pptv) | shift<br>(pptv) | offset<br>(pptv) | gain<br>(pptv) | spectro<br>(pptv) | T+LOS<br>(pptv) | noise<br>(pptv) | random<br>(pptv) | syst<br>(pptv) | total<br>(pptv) |
|------------------|-----------------------|------------------|---------------|-----------------|------------------|----------------|-------------------|-----------------|-----------------|------------------|----------------|-----------------|
| 11               | 245.06                | 2.74             | 1.62          | 0.12            | 2.16             | 2.34           | 11.27             | 6.27            | 6.31            | 10.22            | 11.04          | 15.05           |
| 14               | 251.33                | 2.68             | 1.63          | 0.18            | 1.11             | 2.88           | 9.97              | 4.08            | 5.37            | 7.70             | 10.25          | 12.82           |
| 17               | 241.14                | 2.42             | 2.09          | 0.07            | 1.04             | 3.31           | 13.18             | 4.31            | 5.64            | 7.86             | 13.58          | 15.69           |
| 20               | 201.26                | 2.31             | 3.63          | 0.21            | 0.69             | 2.13           | 13.86             | 2.66            | 6.24            | 7.62             | 14.27          | 16.18           |
| 23               | 123.52                | 2.46             | 1.96          | 0.27            | 0.88             | 1.24           | 11.76             | 2.03            | 6.93            | 7.88             | 11.86          | 14.24           |
| 26               | 62.76                 | 2.50             | 2.21          | 0.08            | 1.15             | 0.35           | 7.14              | 1.18            | 7.76            | 8.79             | 6.92           | 11.19           |
| 29               | 20.90                 | 2.47             | 1.69          | 0.22            | 1.49             | 0.14           | 2.92              | 0.62            | 9.35            | 9.93             | 2.99           | 10.37           |
| 32               | 3.79                  | 1.65             | 0.51          | 0.13            | 1.65             | 0.05           | 0.70              | 0.25            | 10.48           | 10.76            | 0.47           | 10.77           |
| 35               | 4.03                  | 1.33             | 0.13          | 0.07            | 2.20             | 0.05           | 1.17              | 0.16            | 11.91           | 12.19            | 1.08           | 12.24           |
| 38               | 1.11                  | 1.36             | 0.10          | 0.04            | 2.87             | 0.06           | 1.59              | 0.19            | 13.86           | 14.22            | 1.53           | 14.30           |
| 41               | 2.93                  | 1.39             | 0.15          | 0.03            | 3.56             | 0.07           | 1.82              | 0.21            | 15.51           | 15.98            | 1.76           | 16.08           |

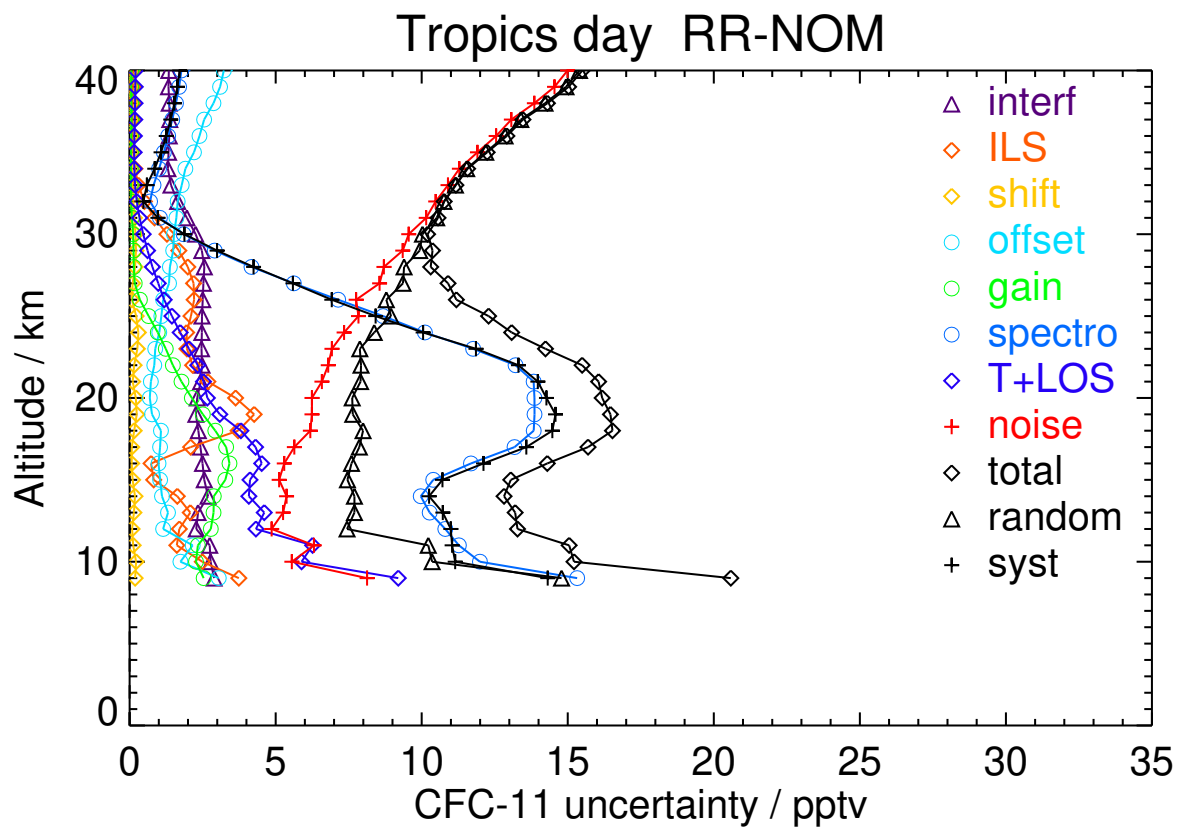

Figure S51. V8R\_F-11\_261 Tropics day

Table S53. CFC-11 error budget for Tropics night. All uncertainties are  $1\sigma$ .

| altitude<br>(km) | mean target<br>(pptv) | interf<br>(pptv) | ILS<br>(pptv) | shift<br>(pptv) | offset<br>(pptv) | gain<br>(pptv) | spectro<br>(pptv) | T+LOS<br>(pptv) | noise<br>(pptv) | random<br>(pptv) | syst<br>(pptv) | total<br>(pptv) |
|------------------|-----------------------|------------------|---------------|-----------------|------------------|----------------|-------------------|-----------------|-----------------|------------------|----------------|-----------------|
| 11               | 244.09                | 2.74             | 2.02          | 0.24            | 1.98             | 2.36           | 11.28             | 5.96            | 5.93            | 9.80             | 11.09          | 14.80           |
| 14               | 256.73                | 2.66             | 1.24          | 0.16            | 1.16             | 3.01           | 10.17             | 4.15            | 5.42            | 7.65             | 10.51          | 13.00           |
| 17               | 238.42                | 2.40             | 1.78          | 0.09            | 1.17             | 3.42           | 12.35             | 4.47            | 5.75            | 7.98             | 12.80          | 15.08           |
| 20               | 199.34                | 2.33             | 3.61          | 0.13            | 0.68             | 2.29           | 14.18             | 2.78            | 6.34            | 7.60             | 14.68          | 16.53           |
| 23               | 117.35                | 2.48             | 1.90          | 0.27            | 0.87             | 1.13           | 11.02             | 2.05            | 6.99            | 8.03             | 11.04          | 13.65           |
| 26               | 60.45                 | 2.49             | 1.99          | 0.04            | 1.11             | 0.42           | 6.61              | 1.15            | 7.81            | 8.62             | 6.57           | 10.84           |
| 29               | 20.59                 | 2.46             | 1.42          | 0.20            | 1.45             | 0.08           | 2.61              | 0.59            | 9.30            | 9.82             | 2.72           | 10.19           |
| 32               | 4.88                  | 1.66             | 0.46          | 0.12            | 1.64             | 0.04           | 0.72              | 0.25            | 10.59           | 10.87            | 0.45           | 10.88           |
| 35               | 1.32                  | 1.28             | 0.14          | 0.05            | 2.17             | 0.06           | 1.25              | 0.16            | 11.96           | 12.24            | 1.12           | 12.29           |
| 38               | 6.75                  | 1.35             | 0.14          | 0.02            | 2.83             | 0.07           | 1.59              | 0.19            | 13.93           | 14.29            | 1.51           | 14.37           |
| 41               | 10.31                 | 1.40             | 0.17          | 0.02            | 3.55             | 0.08           | 1.66              | 0.21            | 15.67           | 16.14            | 1.56           | 16.21           |

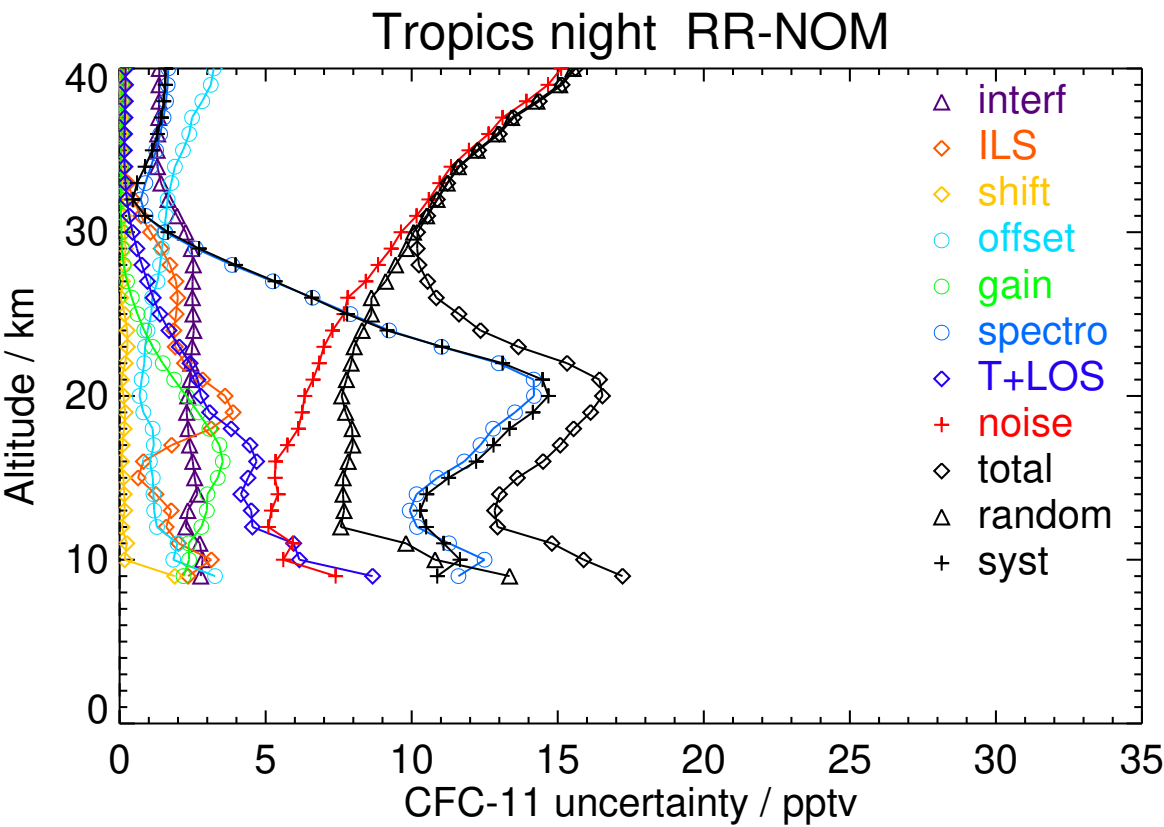

Figure S52. V8R\_F-11\_261 Tropics night

**Table S54.** CFC-11 error budget for Southern midlatitude winter day. All uncertainties are  $1\sigma$ .

| altitude<br>(km) | mean target<br>(pptv) | interf<br>(pptv) | ILS<br>(pptv) | shift<br>(pptv) | offset<br>(pptv) | gain<br>(pptv) | spectro<br>(pptv) | T+LOS<br>(pptv) | noise<br>(pptv) | random<br>(pptv) | syst<br>(pptv) | total<br>(pptv) |
|------------------|-----------------------|------------------|---------------|-----------------|------------------|----------------|-------------------|-----------------|-----------------|------------------|----------------|-----------------|
| 8                | 241.41                | 2.32             | 0.99          | 0.21            | 1.59             | 3.41           | 11.64             | 5.91            | 5.08            | 9.15             | 11.54          | 14.73           |
| 11               | 228.43                | 3.00             | 2.18          | 0.26            | 1.07             | 3.16           | 12.06             | 4.53            | 4.51            | 7.62             | 12.38          | 14.53           |
| 14               | 201.04                | 2.68             | 3.24          | 0.28            | 1.11             | 2.91           | 12.62             | 3.67            | 4.43            | 7.04             | 13.05          | 14.83           |
| 17               | 141.52                | 2.48             | 2.52          | 0.14            | 0.91             | 2.77           | 12.98             | 2.89            | 5.21            | 7.06             | 13.24          | 15.00           |
| 20               | 68.66                 | 2.41             | 1.72          | 0.16            | 0.88             | 1.62           | 8.78              | 1.79            | 6.31            | 7.56             | 8.66           | 11.50           |
| 23               | 23.74                 | 2.39             | 0.50          | 0.05            | 1.02             | 0.53           | 4.13              | 0.81            | 7.43            | 8.20             | 3.59           | 8.95            |
| 26               | 8.04                  | 2.36             | 0.33          | 0.04            | 1.53             | 0.24           | 2.08              | 0.43            | 9.48            | 9.97             | 1.75           | 10.12           |
| 29               | 1.83                  | 2.13             | 0.27          | 0.07            | 1.90             | 0.11           | 1.17              | 0.31            | 11.36           | 11.73            | 1.05           | 11.78           |
| 32               | 1.42                  | 1.47             | 0.17          | 0.05            | 2.53             | 0.13           | 0.62              | 0.19            | 13.44           | 13.77            | 0.29           | 13.77           |
| 35               | 5.00                  | 1.08             | 0.14          | 0.03            | 3.30             | 0.18           | 1.35              | 0.19            | 15.81           | 16.20            | 1.19           | 16.24           |
| 38               | 8.57                  | 1.13             | 0.28          | 0.01            | 4.55             | 0.17           | 2.15              | 0.22            | 17.88           | 18.50            | 2.04           | 18.61           |
| 41               | 9.62                  | 1.49             | 0.39          | 0.02            | 7.09             | 0.20           | 2.73              | 0.24            | 19.26           | 20.59            | 2.65           | 20.76           |

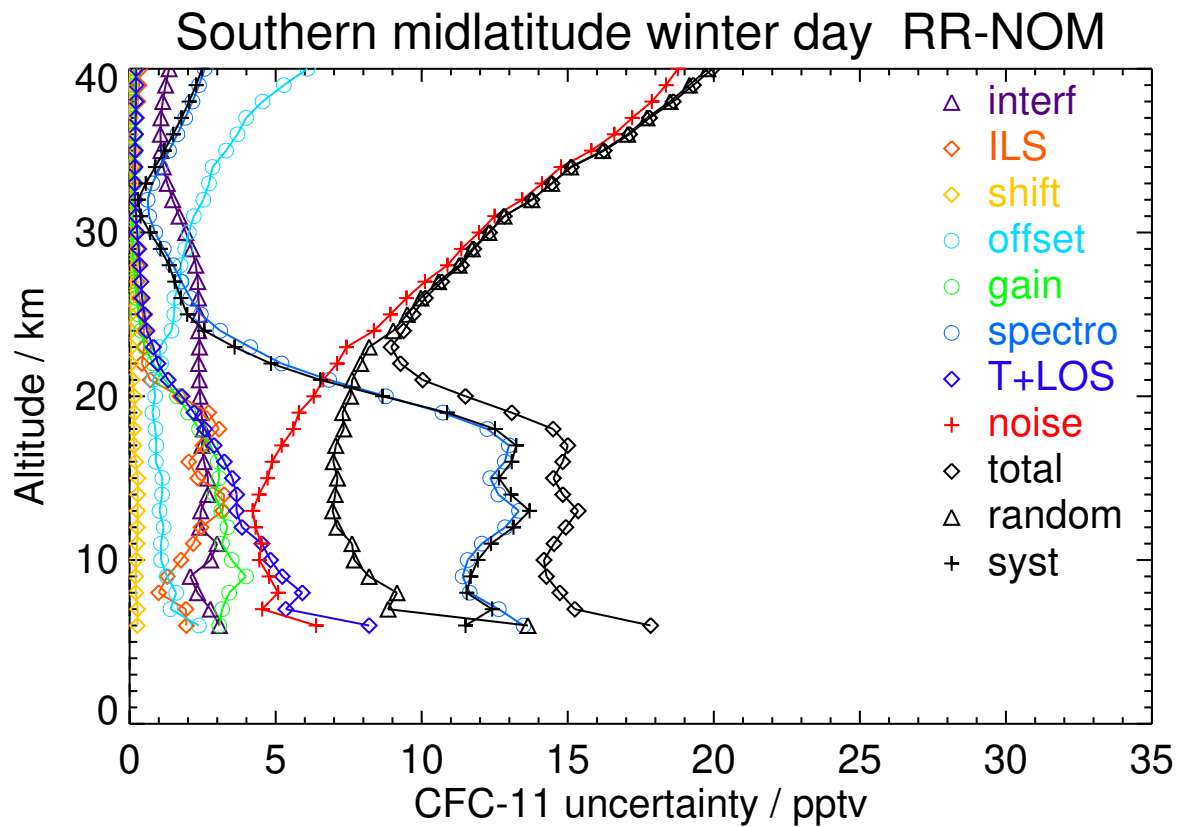

**Figure S53.** V8R\_F-11\_261 Southern midlatitude winter day

**Table S55.** CFC-11 error budget for Southern midlatitude winter night. All uncertainties are  $1\sigma$ .

| altitude<br>(km) | mean target<br>(pptv) | interf<br>(pptv) | ILS<br>(pptv) | shift<br>(pptv) | offset<br>(pptv) | gain<br>(pptv) | spectro<br>(pptv) | T+LOS<br>(pptv) | noise<br>(pptv) | random<br>(pptv) | syst<br>(pptv) | total<br>(pptv) |
|------------------|-----------------------|------------------|---------------|-----------------|------------------|----------------|-------------------|-----------------|-----------------|------------------|----------------|-----------------|
| 8                | 244.83                | 2.19             | 1.14          | 0.16            | 1.56             | 3.23           | 9.96              | 5.87            | 5.24            | 8.76             | 10.16          | 13.42           |
| 11               | 231.97                | 3.08             | 1.82          | 0.22            | 1.68             | 2.80           | 11.40             | 5.01            | 5.15            | 8.46             | 11.56          | 14.32           |
| 14               | 203.61                | 2.45             | 3.29          | 0.30            | 1.47             | 2.72           | 12.09             | 3.76            | 4.67            | 7.05             | 12.61          | 14.45           |
| 17               | 146.36                | 2.39             | 2.71          | 0.15            | 0.99             | 2.53           | 12.78             | 2.96            | 5.28            | 7.16             | 13.00          | 14.85           |
| 20               | 76.06                 | 2.40             | 2.07          | 0.18            | 0.99             | 1.52           | 9.14              | 1.97            | 6.31            | 7.67             | 9.04           | 11.86           |
| 23               | 21.15                 | 2.34             | 0.41          | 0.06            | 1.09             | 0.45           | 4.39              | 0.88            | 7.76            | 8.39             | 4.11           | 9.34            |
| 26               | 1.25                  | 2.34             | 0.18          | 0.03            | 1.47             | 0.13           | 1.38              | 0.38            | 9.03            | 9.49             | 1.08           | 9.55            |
| 29               | 4.16                  | 2.08             | 0.18          | 0.06            | 1.88             | 0.10           | 0.94              | 0.25            | 11.65           | 11.99            | 0.87           | 12.02           |
| 32               | 3.69                  | 1.52             | 0.19          | 0.06            | 2.37             | 0.10           | 0.63              | 0.19            | 13.07           | 13.39            | 0.27           | 13.39           |
| 35               | 3.01                  | 1.18             | 0.11          | 0.03            | 3.04             | 0.09           | 1.20              | 0.17            | 15.18           | 15.54            | 1.10           | 15.58           |
| 38               | 2.17                  | 1.27             | 0.19          | 0.02            | 4.41             | 0.08           | 2.01              | 0.19            | 17.30           | 17.90            | 1.96           | 18.01           |
| 41               | 2.20                  | 1.59             | 0.28          | 0.02            | 6.94             | 0.16           | 2.55              | 0.22            | 18.88           | 20.19            | 2.50           | 20.35           |

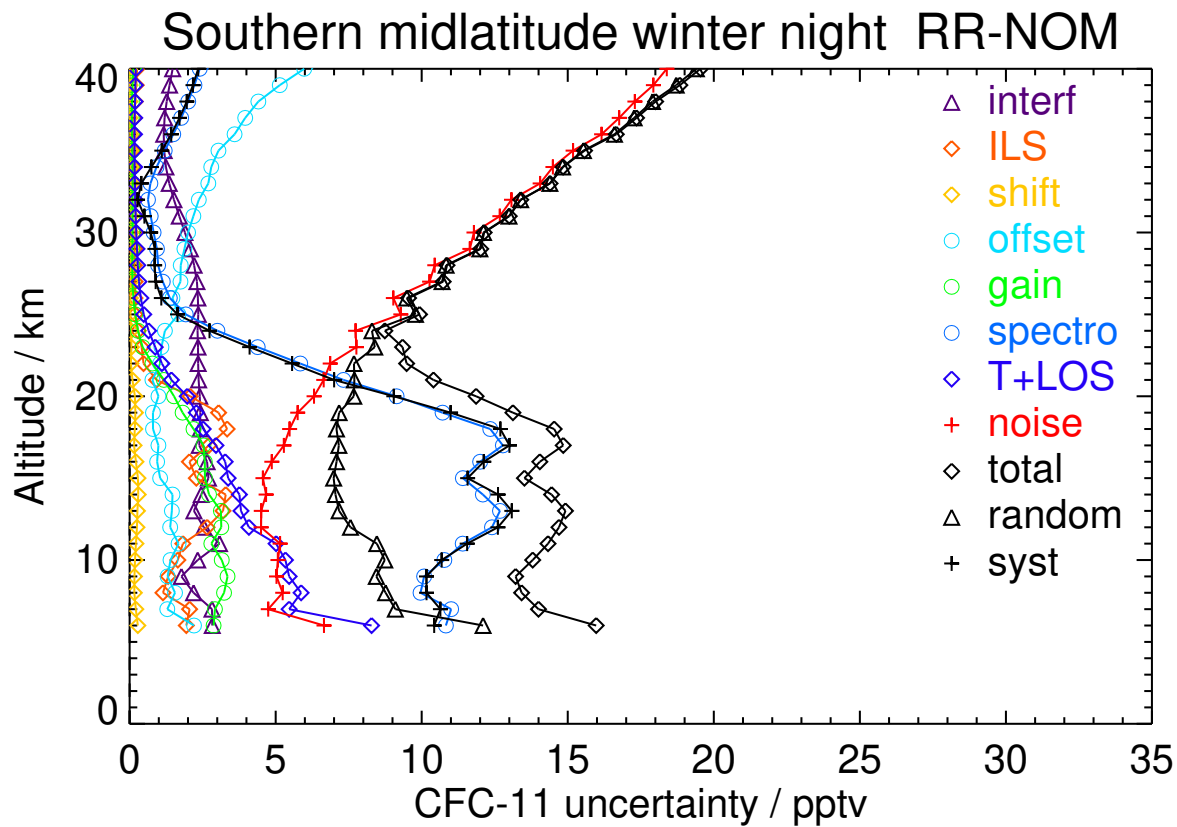

**Figure S54.** V8R\_F-11\_261 Southern midlatitude winter night

**Table S56.** CFC-11 error budget for Southern midlatitude spring day. All uncertainties are  $1\sigma$ .

| altitude<br>(km) | mean target<br>(pptv) | interf<br>(pptv) | ILS<br>(pptv) | shift<br>(pptv) | offset<br>(pptv) | gain<br>(pptv) | spectro<br>(pptv) | T+LOS<br>(pptv) | noise<br>(pptv) | random<br>(pptv) | syst<br>(pptv) | total<br>(pptv) |
|------------------|-----------------------|------------------|---------------|-----------------|------------------|----------------|-------------------|-----------------|-----------------|------------------|----------------|-----------------|
| 8                | 243.47                | 2.31             | 1.78          | 0.21            | 1.74             | 3.18           | 11.30             | 6.06            | 5.44            | 9.40             | 11.29          | 14.69           |
| 11               | 220.41                | 2.76             | 3.97          | 0.26            | 1.00             | 3.09           | 13.26             | 4.43            | 4.53            | 8.05             | 13.61          | 15.81           |
| 14               | 189.43                | 2.54             | 5.21          | 0.24            | 1.16             | 2.47           | 13.13             | 3.69            | 4.46            | 9.33             | 12.64          | 15.71           |
| 17               | 120.99                | 2.54             | 3.48          | 0.11            | 1.02             | 2.47           | 13.36             | 2.74            | 5.03            | 9.31             | 12.26          | 15.39           |
| 20               | 49.33                 | 2.52             | 1.71          | 0.13            | 0.84             | 1.31           | 7.60              | 1.50            | 5.62            | 8.10             | 6.13           | 10.16           |
| 23               | 25.92                 | 2.56             | 0.37          | 0.05            | 0.73             | 0.32           | 2.55              | 0.70            | 6.59            | 7.28             | 2.16           | 7.60            |
| 26               | 17.67                 | 2.57             | 0.25          | 0.02            | 1.18             | 0.15           | 1.57              | 0.35            | 7.79            | 8.35             | 1.25           | 8.44            |
| 29               | 7.81                  | 2.35             | 0.35          | 0.06            | 1.45             | 0.07           | 0.75              | 0.23            | 9.47            | 9.89             | 0.50           | 9.90            |
| 32               | 6.57                  | 1.63             | 0.23          | 0.06            | 1.88             | 0.08           | 0.80              | 0.16            | 10.69           | 11.01            | 0.41           | 11.01           |
| 35               | 7.56                  | 1.21             | 0.11          | 0.04            | 2.46             | 0.13           | 1.08              | 0.14            | 12.99           | 13.29            | 0.87           | 13.32           |
| 38               | 8.94                  | 1.24             | 0.10          | 0.02            | 2.67             | 0.14           | 1.61              | 0.15            | 14.73           | 15.04            | 1.44           | 15.11           |
| 41               | 4.53                  | 1.53             | 0.21          | 0.02            | 3.70             | 0.15           | 2.01              | 0.16            | 16.24           | 16.74            | 1.92           | 16.85           |

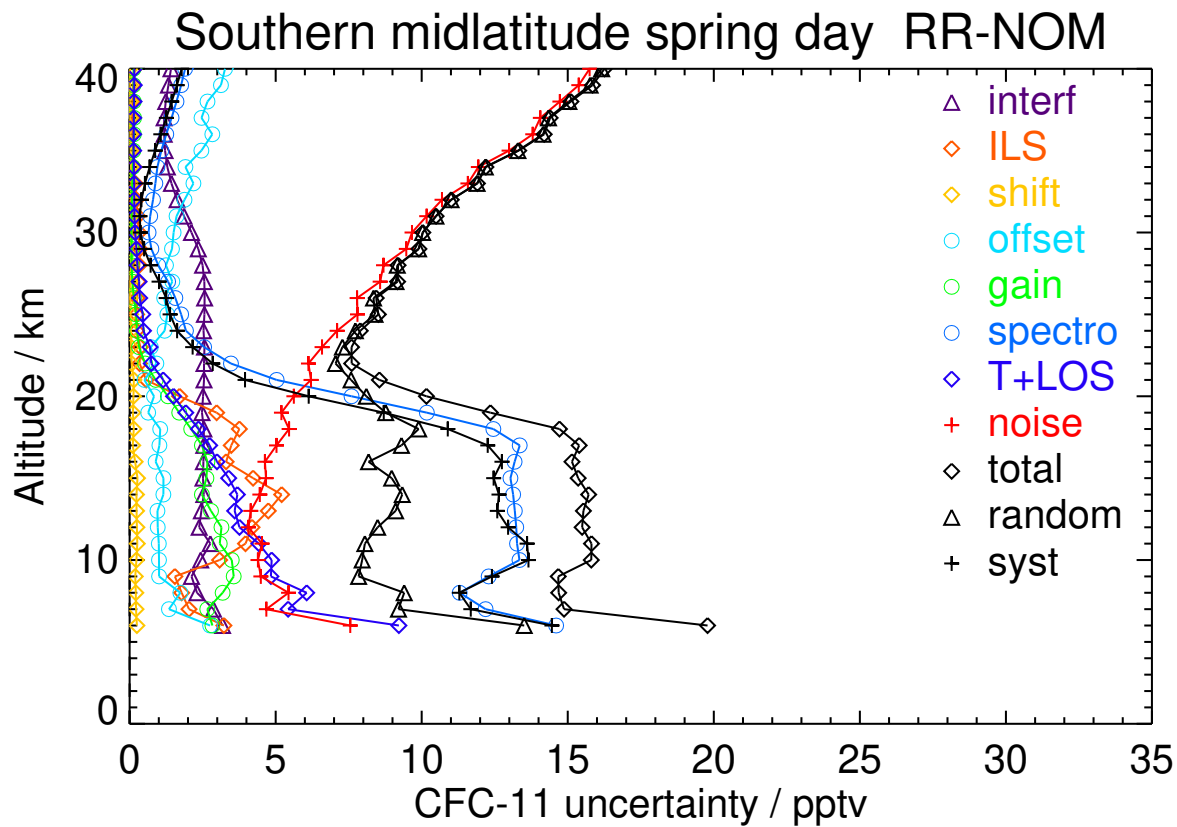

**Figure S55.** V8R\_F-11\_261 Southern midlatitude spring day

**Table S57.** CFC-11 error budget for Southern midlatitude spring night. All uncertainties are  $1\sigma$ .

| altitude<br>(km) | mean target<br>(pptv) | interf<br>(pptv) | ILS<br>(pptv) | shift<br>(pptv) | offset<br>(pptv) | gain<br>(pptv) | spectro<br>(pptv) | T+LOS<br>(pptv) | noise<br>(pptv) | random<br>(pptv) | syst<br>(pptv) | total<br>(pptv) |
|------------------|-----------------------|------------------|---------------|-----------------|------------------|----------------|-------------------|-----------------|-----------------|------------------|----------------|-----------------|
| 8                | 247.86                | 2.25             | 1.70          | 0.16            | 1.43             | 3.18           | 10.28             | 5.78            | 5.04            | 9.00             | 10.18          | 13.59           |
| 11               | 225.75                | 2.85             | 2.70          | 0.24            | 1.40             | 3.03           | 10.99             | 4.71            | 4.99            | 8.28             | 11.23          | 13.95           |
| 14               | 204.90                | 2.44             | 4.58          | 0.28            | 1.30             | 3.00           | 13.33             | 3.78            | 4.55            | 7.70             | 13.82          | 15.82           |
| 17               | 124.08                | 2.48             | 4.09          | 0.12            | 0.87             | 2.62           | 14.02             | 2.92            | 5.17            | 7.92             | 14.13          | 16.20           |
| 20               | 33.95                 | 2.45             | 1.87          | 0.16            | 0.88             | 1.34           | 7.09              | 1.46            | 5.99            | 8.36             | 5.52           | 10.02           |
| 23               | 24.72                 | 2.57             | 0.41          | 0.03            | 0.79             | 0.32           | 2.11              | 0.59            | 6.93            | 7.60             | 1.56           | 7.76            |
| 26               | 11.54                 | 2.55             | 0.48          | 0.03            | 1.17             | 0.18           | 1.56              | 0.36            | 7.85            | 8.40             | 1.34           | 8.50            |
| 29               | 9.74                  | 2.41             | 0.38          | 0.06            | 1.42             | 0.07           | 0.86              | 0.21            | 9.49            | 9.93             | 0.44           | 9.94            |
| 32               | 9.22                  | 1.77             | 0.27          | 0.06            | 1.85             | 0.07           | 0.78              | 0.16            | 10.50           | 10.83            | 0.53           | 10.84           |
| 35               | 6.62                  | 1.40             | 0.15          | 0.04            | 2.38             | 0.10           | 1.02              | 0.15            | 12.76           | 13.07            | 0.85           | 13.10           |
| 38               | 5.63                  | 1.33             | 0.16          | 0.03            | 2.67             | 0.13           | 1.49              | 0.16            | 14.57           | 14.89            | 1.38           | 14.95           |
| 41               | 3.60                  | 1.56             | 0.26          | 0.02            | 3.67             | 0.17           | 1.84              | 0.17            | 16.12           | 16.63            | 1.74           | 16.72           |

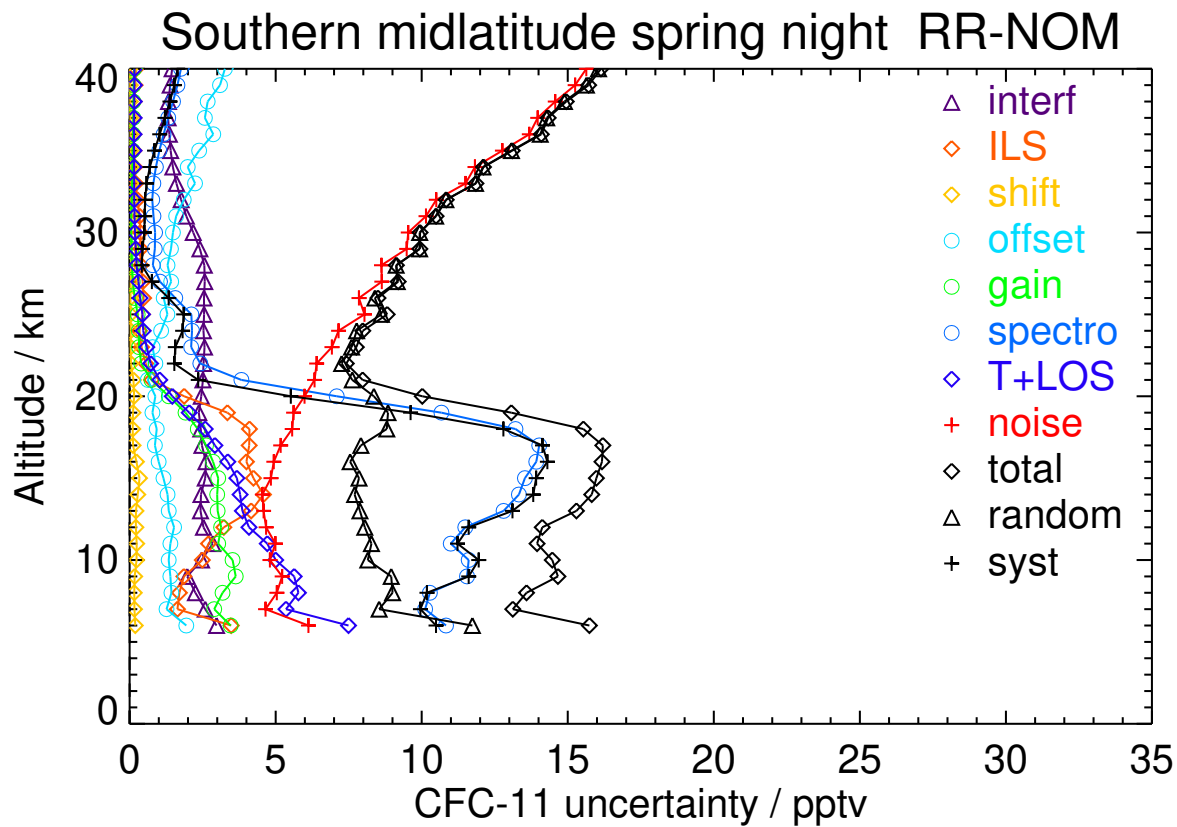

**Figure S56.** V8R\_F-11\_261 Southern midlatitude spring night

**Table S58.** CFC-11 error budget for Southern midlatitude summer day. All uncertainties are  $1\sigma$ .

| altitude<br>(km) | mean target<br>(pptv) | interf<br>(pptv) | ILS<br>(pptv) | shift<br>(pptv) | offset<br>(pptv) | gain<br>(pptv) | spectro<br>(pptv) | T+LOS<br>(pptv) | noise<br>(pptv) | random<br>(pptv) | syst<br>(pptv) | total<br>(pptv) |
|------------------|-----------------------|------------------|---------------|-----------------|------------------|----------------|-------------------|-----------------|-----------------|------------------|----------------|-----------------|
| 8                | 240.43                | 2.52             | 1.62          | 0.25            | 1.56             | 3.11           | 11.06             | 5.61            | 4.84            | 8.84             | 10.96          | 14.08           |
| 11               | 228.52                | 2.81             | 3.42          | 0.25            | 1.04             | 3.26           | 12.18             | 4.42            | 4.29            | 7.95             | 12.43          | 14.76           |
| 14               | 202.19                | 2.50             | 4.63          | 0.23            | 1.27             | 2.48           | 11.53             | 3.59            | 4.37            | 8.53             | 11.30          | 14.15           |
| 17               | 165.57                | 2.45             | 3.62          | 0.09            | 1.21             | 2.63           | 13.22             | 3.25            | 5.10            | 8.06             | 13.18          | 15.45           |
| 20               | 98.36                 | 2.44             | 3.16          | 0.21            | 0.97             | 1.64           | 11.31             | 2.23            | 5.74            | 9.19             | 10.05          | 13.62           |
| 23               | 37.27                 | 2.46             | 1.34          | 0.07            | 0.87             | 0.56           | 6.00              | 1.15            | 6.86            | 7.84             | 5.64           | 9.66            |
| 26               | 6.45                  | 2.58             | 0.39          | 0.04            | 1.08             | 0.11           | 1.38              | 0.41            | 7.24            | 7.84             | 1.00           | 7.91            |
| 29               | 7.71                  | 2.33             | 0.36          | 0.05            | 1.47             | 0.08           | 0.62              | 0.20            | 9.23            | 9.65             | 0.33           | 9.66            |
| 32               | 5.45                  | 1.67             | 0.32          | 0.08            | 1.62             | 0.05           | 0.67              | 0.15            | 9.62            | 9.92             | 0.41           | 9.93            |
| 35               | 9.65                  | 1.80             | 0.17          | 0.05            | 2.26             | 0.14           | 1.08              | 0.16            | 11.65           | 12.01            | 0.94           | 12.05           |
| 38               | 7.38                  | 1.47             | 0.13          | 0.03            | 2.48             | 0.09           | 1.46              | 0.15            | 13.21           | 13.53            | 1.40           | 13.60           |
| 41               | -1.52                 | 1.75             | 0.27          | 0.02            | 3.10             | 0.20           | 1.84              | 0.16            | 14.87           | 15.30            | 1.80           | 15.41           |

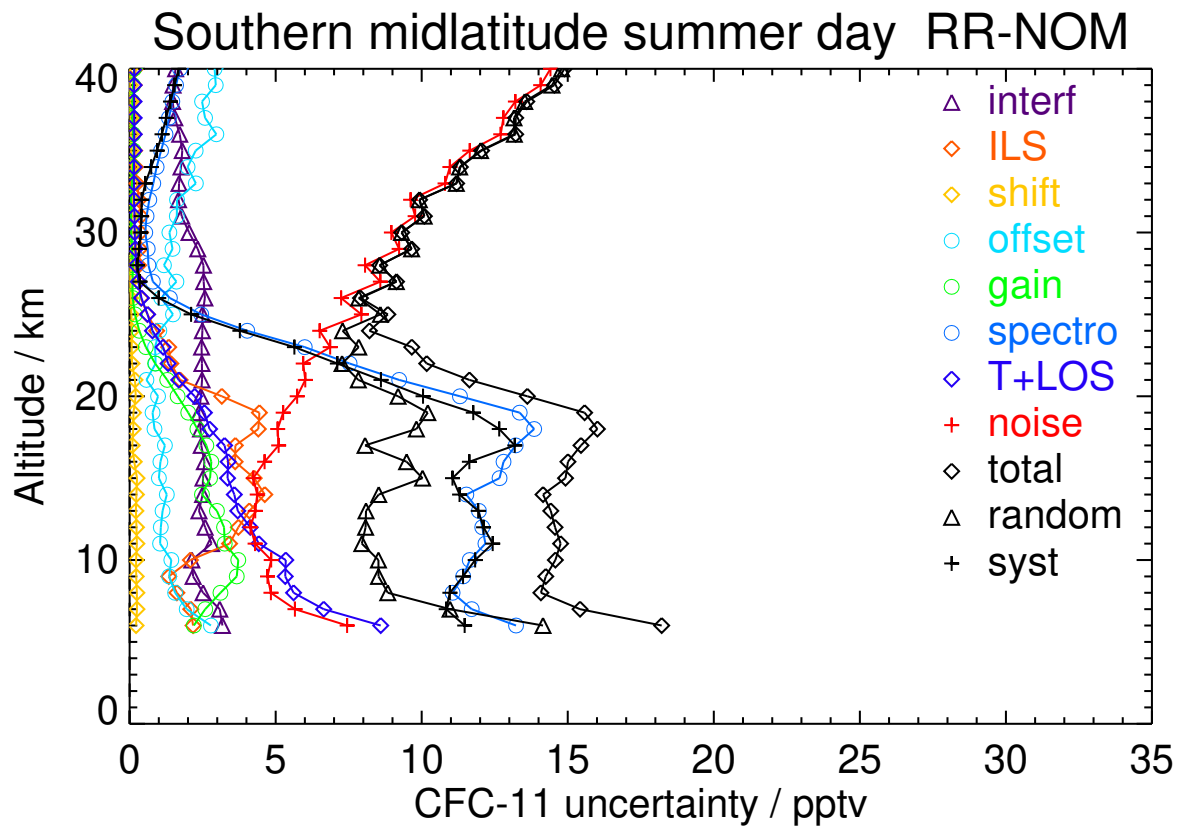

**Figure S57.** V8R\_F-11\_261 Southern midlatitude summer day

**Table S59.** CFC-11 error budget for Southern midlatitude summer night. All uncertainties are  $1\sigma$ .

| altitude<br>(km) | mean target<br>(pptv) | interf<br>(pptv) | ILS<br>(pptv) | shift<br>(pptv) | offset<br>(pptv) | gain<br>(pptv) | spectro<br>(pptv) | T+LOS<br>(pptv) | noise<br>(pptv) | random<br>(pptv) | syst<br>(pptv) | total<br>(pptv) |
|------------------|-----------------------|------------------|---------------|-----------------|------------------|----------------|-------------------|-----------------|-----------------|------------------|----------------|-----------------|
| 8                | 250.56                | 2.61             | 1.99          | 0.17            | 1.59             | 3.00           | 10.14             | 5.83            | 5.10            | 9.07             | 10.14          | 13.61           |
| 11               | 221.02                | 2.75             | 3.24          | 0.26            | 1.60             | 3.26           | 11.61             | 4.81            | 4.86            | 8.54             | 11.83          | 14.59           |
| 14               | 207.31                | 2.40             | 5.50          | 0.23            | 1.47             | 3.09           | 13.15             | 3.74            | 4.55            | 9.23             | 13.05          | 15.98           |
| 17               | 163.07                | 2.57             | 3.40          | 0.11            | 1.18             | 2.82           | 13.47             | 3.06            | 5.03            | 9.48             | 12.41          | 15.61           |
| 20               | 102.89                | 2.46             | 2.75          | 0.20            | 1.01             | 1.98           | 11.65             | 2.22            | 5.69            | 8.38             | 11.02          | 13.84           |
| 23               | 32.69                 | 2.43             | 1.33          | 0.10            | 0.92             | 0.65           | 5.54              | 1.12            | 6.82            | 7.87             | 5.05           | 9.35            |
| 26               | 9.01                  | 2.60             | 0.36          | 0.05            | 1.05             | 0.11           | 1.22              | 0.42            | 7.28            | 7.88             | 0.80           | 7.92            |
| 29               | 7.21                  | 2.32             | 0.47          | 0.06            | 1.43             | 0.09           | 0.73              | 0.23            | 9.10            | 9.53             | 0.48           | 9.54            |
| 32               | 2.05                  | 1.68             | 0.37          | 0.08            | 1.57             | 0.04           | 0.63              | 0.17            | 9.54            | 9.83             | 0.39           | 9.84            |
| 35               | 5.15                  | 1.74             | 0.20          | 0.04            | 2.09             | 0.17           | 1.20              | 0.15            | 11.47           | 11.80            | 1.12           | 11.85           |
| 38               | 8.98                  | 1.46             | 0.21          | 0.02            | 2.38             | 0.10           | 1.61              | 0.15            | 13.04           | 13.34            | 1.55           | 13.43           |
| 41               | 7.88                  | 1.81             | 0.35          | 0.02            | 3.07             | 0.22           | 1.75              | 0.16            | 14.64           | 15.08            | 1.73           | 15.17           |

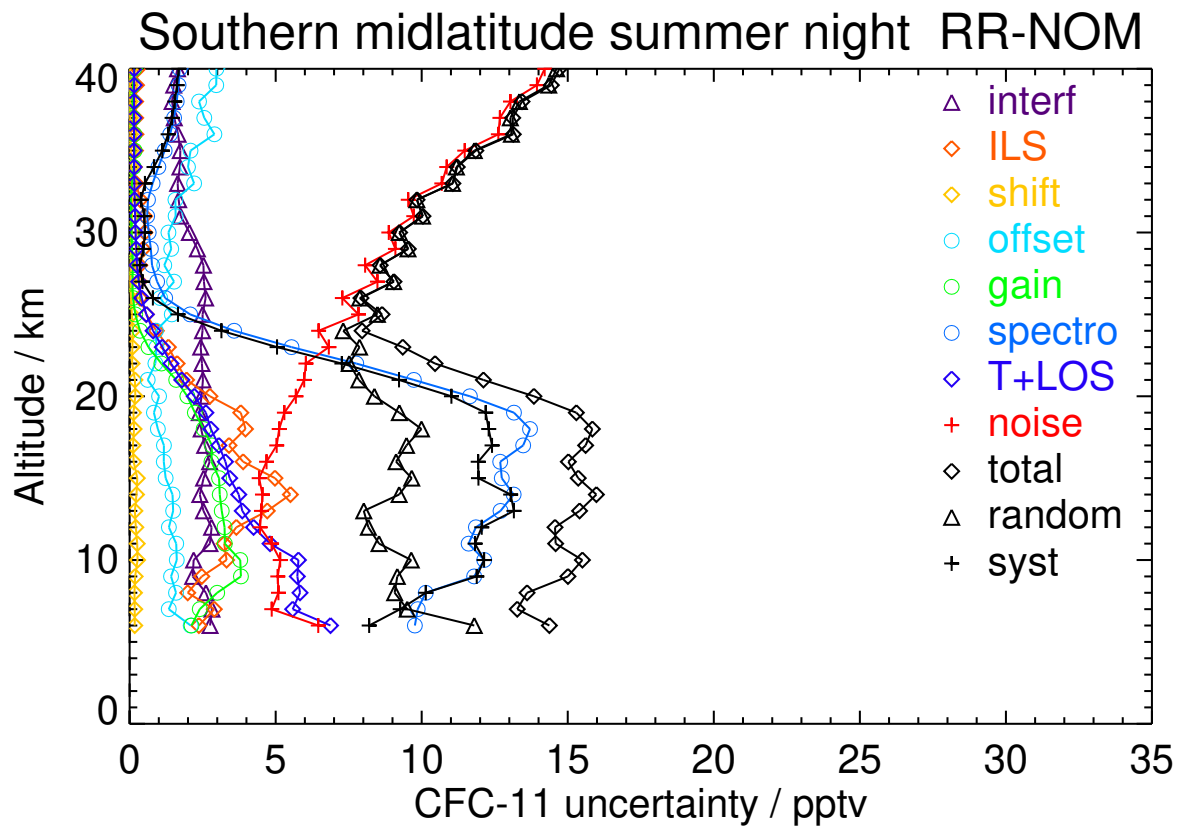

**Figure S58.** V8R\_F-11\_261 Southern midlatitude summer night

**Table S60.** CFC-11 error budget for Southern midlatitude autumn day. All uncertainties are  $1\sigma$ .

| altitude<br>(km) | mean target<br>(pptv) | interf<br>(pptv) | ILS<br>(pptv) | shift<br>(pptv) | offset<br>(pptv) | gain<br>(pptv) | spectro<br>(pptv) | T+LOS<br>(pptv) | noise<br>(pptv) | random<br>(pptv) | syst<br>(pptv) | total<br>(pptv) |
|------------------|-----------------------|------------------|---------------|-----------------|------------------|----------------|-------------------|-----------------|-----------------|------------------|----------------|-----------------|
| 8                | 238.67                | 2.31             | 1.41          | 0.24            | 1.50             | 3.88           | 11.47             | 5.85            | 4.92            | 8.61             | 11.85          | 14.65           |
| 11               | 228.20                | 2.80             | 1.75          | 0.20            | 0.81             | 3.00           | 10.43             | 4.13            | 4.07            | 7.00             | 10.68          | 12.77           |
| 14               | 214.70                | 2.55             | 3.25          | 0.28            | 0.94             | 3.03           | 11.64             | 3.50            | 4.20            | 6.81             | 12.08          | 13.87           |
| 17               | 163.03                | 2.48             | 3.06          | 0.11            | 0.83             | 2.98           | 13.68             | 2.98            | 4.93            | 6.84             | 14.10          | 15.67           |
| 20               | 83.73                 | 2.45             | 1.85          | 0.20            | 0.80             | 1.88           | 9.98              | 1.94            | 5.88            | 7.23             | 9.97           | 12.31           |
| 23               | 24.86                 | 2.48             | 0.79          | 0.06            | 0.83             | 0.67           | 4.81              | 0.93            | 6.80            | 7.85             | 4.07           | 8.84            |
| 26               | 10.33                 | 2.42             | 0.30          | 0.02            | 1.35             | 0.13           | 1.50              | 0.38            | 8.51            | 9.02             | 1.12           | 9.09            |
| 29               | 7.41                  | 2.19             | 0.28          | 0.07            | 1.61             | 0.10           | 1.01              | 0.26            | 9.91            | 10.29            | 0.88           | 10.33           |
| 32               | 7.16                  | 1.58             | 0.22          | 0.07            | 2.17             | 0.10           | 0.69              | 0.18            | 11.65           | 11.98            | 0.31           | 11.98           |
| 35               | 7.11                  | 1.28             | 0.09          | 0.03            | 2.70             | 0.08           | 1.00              | 0.16            | 13.92           | 14.24            | 0.88           | 14.27           |
| 38               | 0.80                  | 1.18             | 0.17          | 0.01            | 3.21             | 0.08           | 1.83              | 0.17            | 15.83           | 16.21            | 1.75           | 16.30           |
| 41               | -0.06                 | 1.36             | 0.30          | 0.02            | 4.98             | 0.12           | 2.47              | 0.19            | 17.37           | 18.13            | 2.45           | 18.29           |

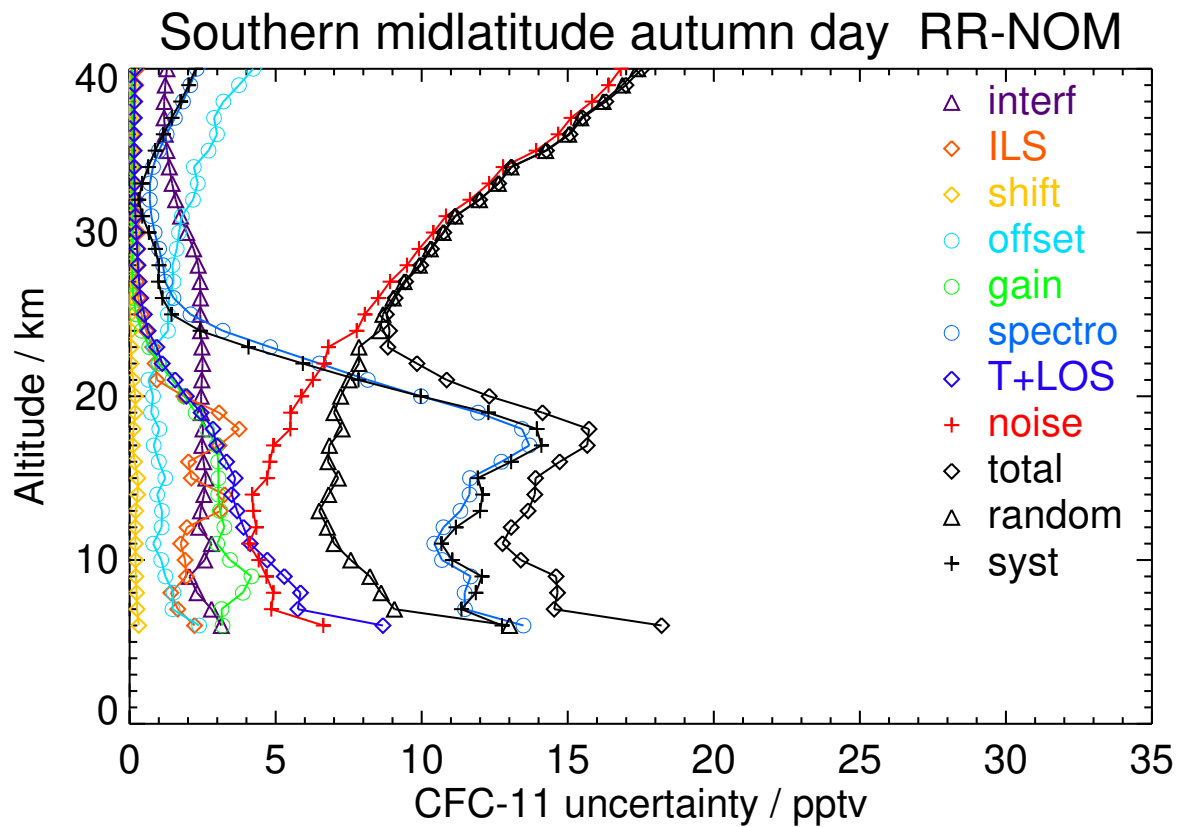

**Figure S59.** V8R\_F-11\_261 Southern midlatitude autumn day

**Table S61.** CFC-11 error budget for Southern midlatitude autumn night. All uncertainties are  $1\sigma$ .

| altitude<br>(km) | mean target<br>(pptv) | interf<br>(pptv) | ILS<br>(pptv) | shift<br>(pptv) | offset<br>(pptv) | gain<br>(pptv) | spectro<br>(pptv) | T+LOS<br>(pptv) | noise<br>(pptv) | random<br>(pptv) | syst<br>(pptv) | total<br>(pptv) |
|------------------|-----------------------|------------------|---------------|-----------------|------------------|----------------|-------------------|-----------------|-----------------|------------------|----------------|-----------------|
| 8                | 241.83                | 2.50             | 2.16          | 0.18            | 1.65             | 3.04           | 10.16             | 5.99            | 5.39            | 9.31             | 10.22          | 13.82           |
| 11               | 234.41                | 3.05             | 1.60          | 0.22            | 1.51             | 2.92           | 10.72             | 4.80            | 4.98            | 8.19             | 10.88          | 13.62           |
| 14               | 218.92                | 2.40             | 3.82          | 0.28            | 1.37             | 3.10           | 12.03             | 3.75            | 4.57            | 7.25             | 12.62          | 14.55           |
| 17               | 168.37                | 2.47             | 3.36          | 0.11            | 1.04             | 2.97           | 14.69             | 3.13            | 5.18            | 7.20             | 15.09          | 16.72           |
| 20               | 86.11                 | 2.47             | 2.17          | 0.22            | 0.96             | 1.72           | 10.07             | 2.12            | 6.03            | 7.47             | 10.07          | 12.54           |
| 23               | 25.87                 | 2.47             | 0.67          | 0.06            | 0.91             | 0.66           | 4.71              | 0.94            | 7.25            | 8.11             | 4.20           | 9.13            |
| 26               | 10.09                 | 2.44             | 0.31          | 0.03            | 1.18             | 0.17           | 1.78              | 0.40            | 7.98            | 8.56             | 1.17           | 8.63            |
| 29               | 5.64                  | 2.21             | 0.38          | 0.07            | 1.57             | 0.07           | 1.06              | 0.26            | 10.17           | 10.56            | 0.76           | 10.59           |
| 32               | 7.13                  | 1.66             | 0.22          | 0.07            | 1.91             | 0.08           | 0.60              | 0.16            | 11.06           | 11.36            | 0.29           | 11.36           |
| 35               | 6.50                  | 1.27             | 0.10          | 0.04            | 2.40             | 0.08           | 1.13              | 0.14            | 13.28           | 13.57            | 0.98           | 13.61           |
| 38               | 6.87                  | 1.27             | 0.19          | 0.02            | 3.02             | 0.09           | 1.93              | 0.16            | 15.33           | 15.69            | 1.84           | 15.79           |
| 41               | 10.70                 | 1.53             | 0.33          | 0.02            | 4.64             | 0.14           | 2.37              | 0.18            | 16.84           | 17.54            | 2.32           | 17.70           |

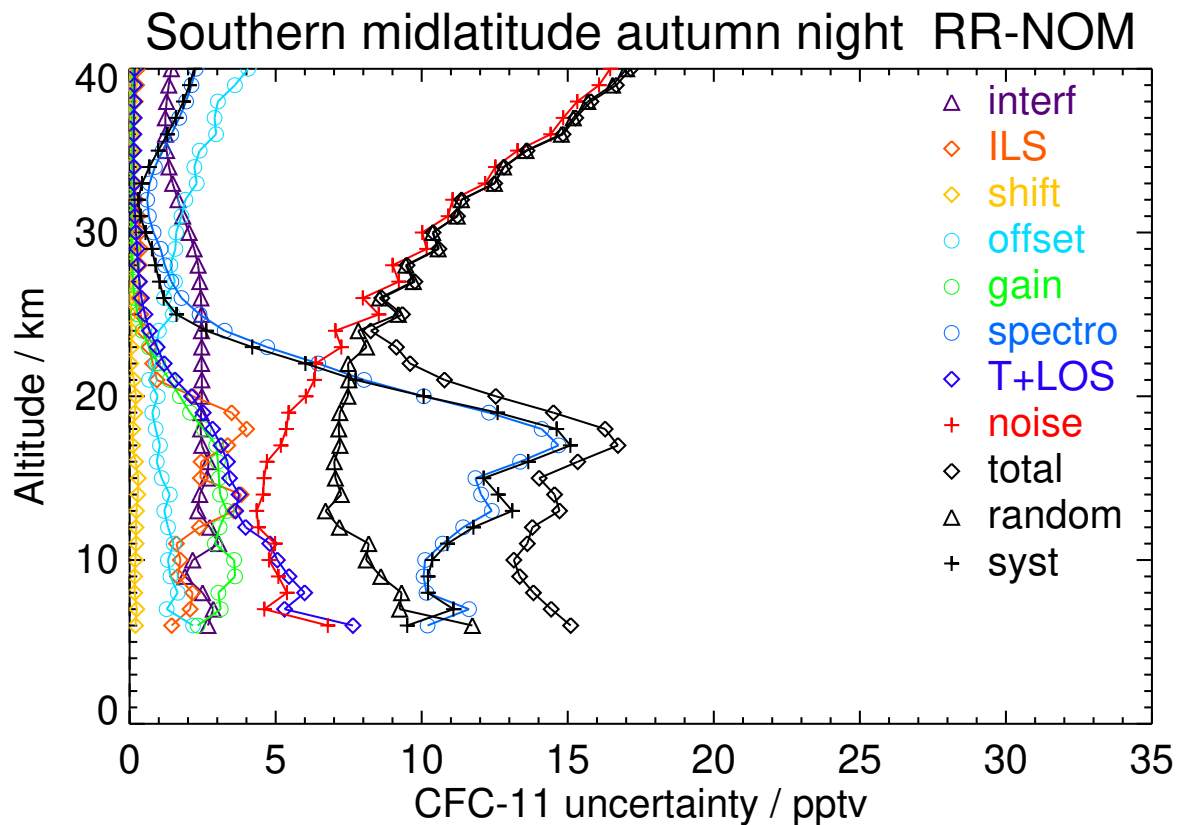

**Figure S60.** V8R\_F-11\_261 Southern midlatitude autumn night

**Table S62.** CFC-11 error budget for Southern polar winter day. All uncertainties are  $1\sigma$ .

| altitude<br>(km) | mean target<br>(pptv) | interf<br>(pptv) | ILS<br>(pptv) | shift<br>(pptv) | offset<br>(pptv) | gain<br>(pptv) | spectro<br>(pptv) | T+LOS<br>(pptv) | noise<br>(pptv) | random<br>(pptv) | syst<br>(pptv) | total<br>(pptv) |
|------------------|-----------------------|------------------|---------------|-----------------|------------------|----------------|-------------------|-----------------|-----------------|------------------|----------------|-----------------|
| 5                | 245.34                | 2.99             | 1.95          | 0.33            | 2.96             | 3.35           | 14.68             | 10.49           | 7.60            | 14.71            | 14.14          | 20.40           |
| 8                | 242.83                | 2.24             | 1.25          | 0.23            | 0.84             | 3.74           | 11.80             | 4.71            | 4.05            | 7.18             | 12.15          | 14.11           |
| 11               | 224.46                | 2.44             | 2.66          | 0.33            | 1.03             | 3.53           | 13.91             | 4.20            | 4.16            | 7.12             | 14.29          | 15.97           |
| 14               | 155.57                | 2.52             | 4.27          | 0.38            | 1.14             | 2.95           | 16.99             | 4.19            | 5.02            | 8.55             | 17.12          | 19.14           |
| 17               | 48.49                 | 2.34             | 2.86          | 0.13            | 0.85             | 1.49           | 10.26             | 2.28            | 6.10            | 7.75             | 10.21          | 12.81           |
| 20               | 7.94                  | 2.35             | 0.52          | 0.04            | 0.93             | 0.42           | 2.72              | 0.70            | 7.57            | 8.40             | 1.21           | 8.48            |
| 23               | 1.17                  | 2.47             | 0.21          | 0.03            | 1.46             | 0.10           | 1.17              | 0.32            | 8.69            | 9.21             | 0.58           | 9.23            |
| 26               | 0.62                  | 2.45             | 0.29          | 0.05            | 1.92             | 0.08           | 1.03              | 0.26            | 11.20           | 11.65            | 0.83           | 11.68           |
| 29               | 3.03                  | 2.12             | 0.27          | 0.05            | 2.18             | 0.11           | 0.66              | 0.21            | 12.16           | 12.55            | 0.47           | 12.55           |
| 32               | 1.69                  | 1.60             | 0.26          | 0.04            | 2.89             | 0.13           | 0.80              | 0.20            | 14.24           | 14.63            | 0.44           | 14.64           |
| 35               | 1.26                  | 1.42             | 0.17          | 0.02            | 3.78             | 0.15           | 1.29              | 0.18            | 16.24           | 16.74            | 1.18           | 16.79           |
| 38               | 1.28                  | 1.60             | 0.21          | 0.02            | 5.16             | 0.13           | 1.88              | 0.20            | 17.99           | 18.80            | 1.79           | 18.88           |
| 41               | -1.10                 | 1.93             | 0.29          | 0.02            | 7.65             | 0.18           | 2.28              | 0.25            | 19.26           | 20.83            | 2.19           | 20.94           |

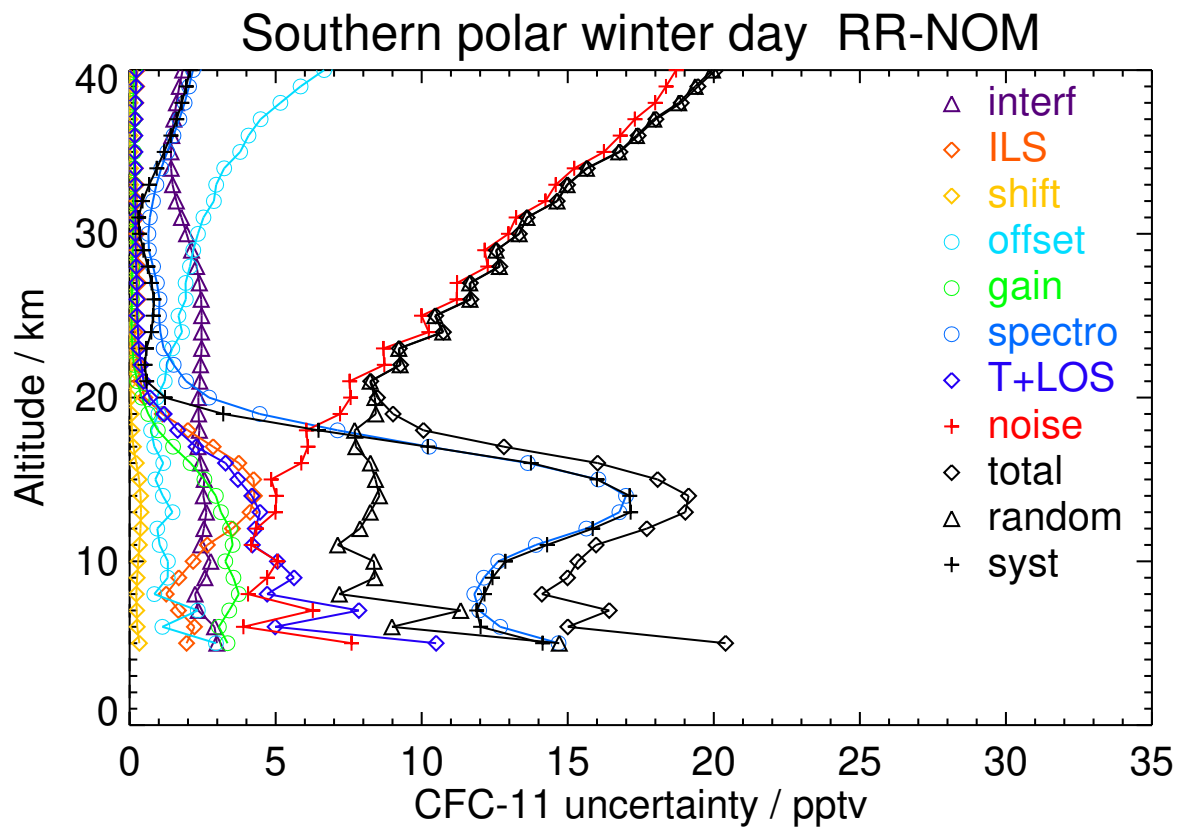

**Figure S61.** V8R\_F-11\_261 Southern polar winter day

**Table S63.** CFC-11 error budget for Southern polar winter night. All uncertainties are  $1\sigma$ .

| altitude<br>(km) | mean target<br>(pptv) | interf<br>(pptv) | ILS<br>(pptv) | shift<br>(pptv) | offset<br>(pptv) | gain<br>(pptv) | spectro<br>(pptv) | T+LOS<br>(pptv) | noise<br>(pptv) | random<br>(pptv) | syst<br>(pptv) | total<br>(pptv) |
|------------------|-----------------------|------------------|---------------|-----------------|------------------|----------------|-------------------|-----------------|-----------------|------------------|----------------|-----------------|
| 5                | 242.37                | 2.85             | 2.71          | 0.32            | 2.83             | 2.96           | 13.42             | 10.13           | 7.46            | 14.49            | 12.68          | 19.25           |
| 8                | 245.99                | 1.81             | 0.79          | 0.16            | 1.01             | 3.47           | 9.50              | 4.89            | 4.35            | 7.33             | 9.82           | 12.26           |
| 11               | 226.99                | 2.24             | 2.00          | 0.25            | 1.02             | 3.50           | 11.68             | 4.11            | 4.21            | 6.90             | 12.08          | 13.91           |
| 14               | 177.14                | 2.53             | 3.99          | 0.38            | 0.91             | 2.94           | 15.75             | 4.13            | 4.77            | 7.59             | 16.20          | 17.89           |
| 17               | 60.90                 | 2.31             | 3.42          | 0.24            | 0.72             | 1.54           | 10.75             | 2.41            | 5.70            | 7.32             | 10.96          | 13.18           |
| 20               | 7.72                  | 2.29             | 1.03          | 0.08            | 0.91             | 0.36           | 3.59              | 0.90            | 7.15            | 8.17             | 2.29           | 8.49            |
| 23               | 1.47                  | 2.45             | 0.33          | 0.04            | 1.33             | 0.09           | 1.04              | 0.37            | 8.35            | 8.87             | 0.35           | 8.88            |
| 26               | 3.36                  | 2.46             | 0.36          | 0.06            | 1.87             | 0.08           | 1.36              | 0.30            | 11.04           | 11.50            | 1.12           | 11.56           |
| 29               | 2.13                  | 2.24             | 0.42          | 0.06            | 2.14             | 0.07           | 0.93              | 0.23            | 12.11           | 12.53            | 0.68           | 12.55           |
| 32               | 2.40                  | 1.72             | 0.27          | 0.03            | 2.83             | 0.08           | 0.68              | 0.19            | 14.01           | 14.40            | 0.45           | 14.41           |
| 35               | 2.61                  | 1.47             | 0.17          | 0.03            | 3.72             | 0.07           | 1.30              | 0.19            | 15.86           | 16.38            | 1.15           | 16.42           |
| 38               | 1.93                  | 1.58             | 0.21          | 0.02            | 5.06             | 0.09           | 1.82              | 0.21            | 17.66           | 18.45            | 1.74           | 18.53           |
| 41               | 3.27                  | 1.87             | 0.27          | 0.02            | 7.58             | 0.13           | 2.12              | 0.26            | 19.12           | 20.67            | 2.02           | 20.77           |

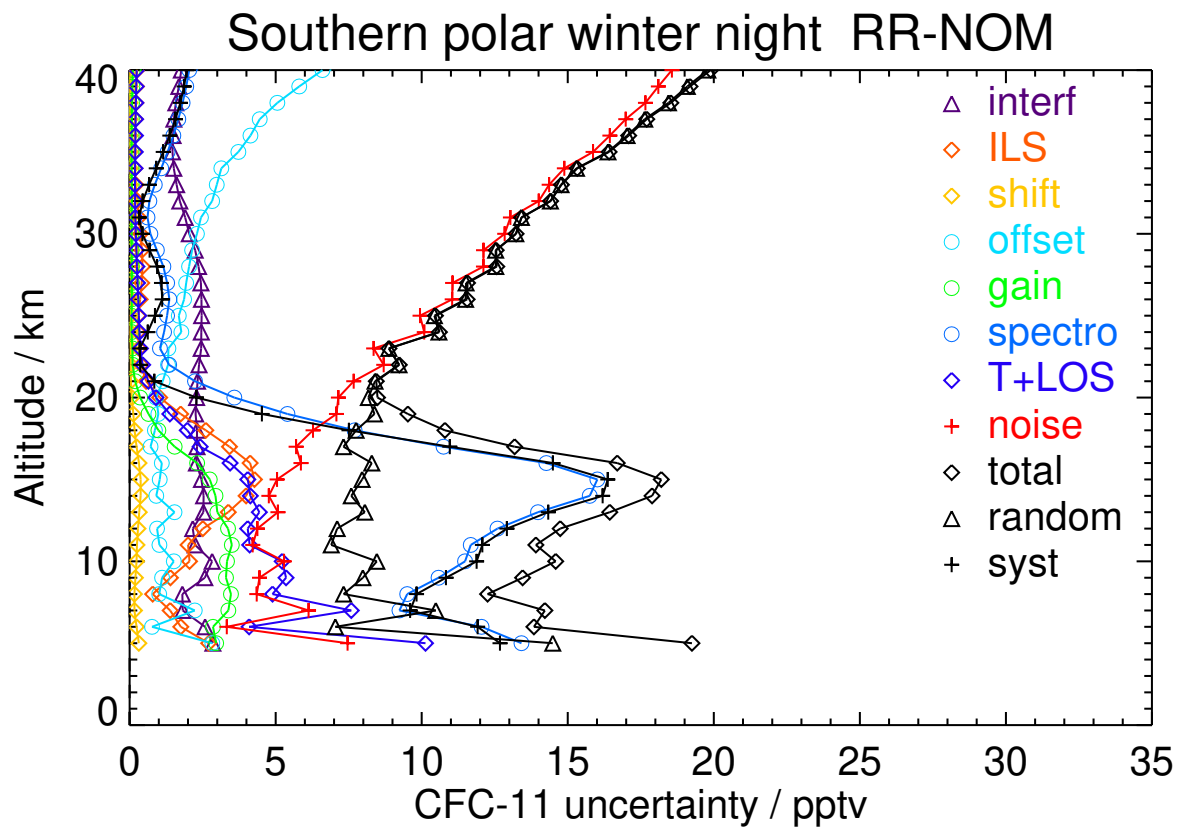

**Figure S62.** V8R\_F-11\_261 Southern polar winter night

**Table S64.** CFC-11 error budget for Southern polar spring day. All uncertainties are  $1\sigma$ .

| altitude<br>(km) | mean target<br>(pptv) | interf<br>(pptv) | ILS<br>(pptv) | shift<br>(pptv) | offset<br>(pptv) | gain<br>(pptv) | spectro<br>(pptv) | T+LOS<br>(pptv) | noise<br>(pptv) | random<br>(pptv) | syst<br>(pptv) | total<br>(pptv) |
|------------------|-----------------------|------------------|---------------|-----------------|------------------|----------------|-------------------|-----------------|-----------------|------------------|----------------|-----------------|
| 5                | 235.38                | 2.96             | 2.18          | 0.25            | 2.57             | 2.32           | 12.75             | 8.96            | 7.14            | 13.38            | 11.85          | 17.87           |
| 8                | 244.73                | 2.12             | 1.85          | 0.17            | 1.08             | 3.75           | 11.26             | 4.73            | 4.58            | 7.64             | 11.62          | 13.90           |
| 11               | 222.60                | 2.36             | 6.10          | 0.25            | 1.21             | 3.50           | 17.06             | 4.31            | 4.36            | 8.91             | 17.49          | 19.63           |
| 14               | 117.09                | 2.44             | 6.16          | 0.15            | 1.27             | 1.64           | 14.06             | 3.48            | 4.90            | 11.30            | 12.43          | 16.79           |
| 17               | 59.38                 | 2.51             | 3.79          | 0.21            | 0.98             | 1.33           | 9.48              | 1.89            | 5.57            | 8.90             | 8.30           | 12.17           |
| 20               | 19.32                 | 2.52             | 0.72          | 0.07            | 0.58             | 0.56           | 2.73              | 0.74            | 6.50            | 7.51             | 1.17           | 7.60            |
| 23               | 13.15                 | 2.64             | 0.37          | 0.02            | 0.96             | 0.27           | 1.52              | 0.37            | 6.58            | 7.28             | 0.99           | 7.34            |
| 26               | 9.18                  | 2.69             | 0.45          | 0.03            | 1.60             | 0.13           | 0.98              | 0.29            | 8.83            | 9.42             | 0.58           | 9.43            |
| 29               | 6.45                  | 2.56             | 0.36          | 0.04            | 1.26             | 0.11           | 0.61              | 0.20            | 8.74            | 9.22             | 0.42           | 9.23            |
| 32               | 3.04                  | 2.09             | 0.53          | 0.08            | 2.36             | 0.15           | 0.92              | 0.21            | 10.80           | 11.29            | 0.58           | 11.31           |
| 35               | 2.48                  | 1.77             | 0.30          | 0.07            | 3.04             | 0.12           | 0.99              | 0.20            | 12.95           | 13.44            | 0.88           | 13.47           |
| 38               | 5.66                  | 1.55             | 0.26          | 0.05            | 3.02             | 0.11           | 1.35              | 0.19            | 14.41           | 14.82            | 1.23           | 14.87           |
| 41               | 8.58                  | 1.52             | 0.23          | 0.04            | 3.51             | 0.12           | 1.40              | 0.18            | 15.96           | 16.43            | 1.26           | 16.47           |

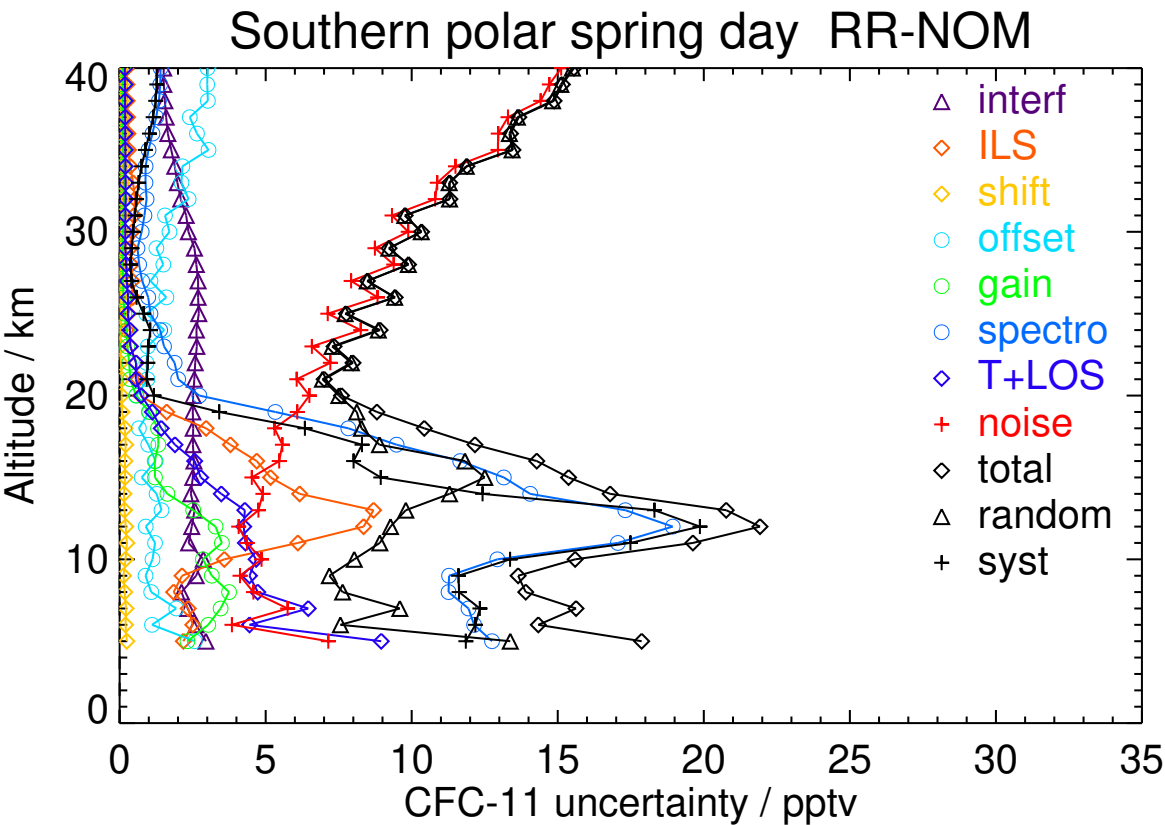

**Figure S63.** V8R\_F-11\_261 Southern polar spring day

Table S65. CFC-11 error budget for Southern polar spring night. All uncertainties are  $1\sigma$ .

| altitude<br>(km) | mean target<br>(pptv) | interf<br>(pptv) | ILS<br>(pptv) | shift<br>(pptv) | offset<br>(pptv) | gain<br>(pptv) | spectro<br>(pptv) | T+LOS<br>(pptv) | noise<br>(pptv) | random<br>(pptv) | syst<br>(pptv) | total<br>(pptv) |
|------------------|-----------------------|------------------|---------------|-----------------|------------------|----------------|-------------------|-----------------|-----------------|------------------|----------------|-----------------|
| 5                | 237.01                | 2.79             | 2.01          | 0.19            | 2.36             | 2.68           | 11.04             | 8.64            | 6.77            | 12.66            | 10.33          | 16.34           |
| 8                | 249.49                | 1.67             | 1.94          | 0.23            | 1.47             | 3.89           | 10.75             | 5.38            | 5.27            | 8.58             | 11.08          | 14.01           |
| 11               | 214.34                | 2.18             | 4.32          | 0.21            | 1.50             | 3.41           | 14.47             | 4.00            | 4.46            | 7.80             | 14.89          | 16.81           |
| 14               | 127.38                | 2.51             | 6.70          | 0.19            | 1.37             | 2.29           | 14.18             | 3.66            | 4.90            | 9.37             | 14.46          | 17.23           |
| 17               | 58.23                 | 2.55             | 3.53          | 0.14            | 1.22             | 1.27           | 8.18              | 1.89            | 5.52            | 9.14             | 6.29           | 11.09           |
| 20               | 25.52                 | 2.54             | 0.74          | 0.06            | 0.48             | 0.68           | 3.10              | 0.92            | 6.34            | 7.30             | 2.24           | 7.63            |
| 23               | 14.82                 | 2.68             | 0.24          | 0.02            | 0.96             | 0.29           | 1.58              | 0.40            | 6.44            | 7.15             | 1.10           | 7.23            |
| 26               | 9.54                  | 2.61             | 0.32          | 0.03            | 1.57             | 0.11           | 0.85              | 0.30            | 8.78            | 9.33             | 0.55           | 9.35            |
| 29               | 6.59                  | 2.42             | 0.33          | 0.04            | 1.20             | 0.09           | 0.81              | 0.18            | 8.64            | 9.09             | 0.46           | 9.10            |
| 32               | 8.48                  | 1.85             | 0.50          | 0.08            | 2.33             | 0.14           | 0.97              | 0.20            | 10.80           | 11.24            | 0.57           | 11.26           |
| 35               | 5.78                  | 1.66             | 0.28          | 0.06            | 3.00             | 0.11           | 0.93              | 0.17            | 12.90           | 13.36            | 0.81           | 13.39           |
| 38               | 5.56                  | 1.54             | 0.22          | 0.04            | 2.96             | 0.11           | 1.41              | 0.18            | 14.40           | 14.80            | 1.26           | 14.86           |
| 41               | 6.81                  | 1.56             | 0.19          | 0.03            | 3.54             | 0.10           | 1.60              | 0.19            | 15.95           | 16.43            | 1.46           | 16.50           |

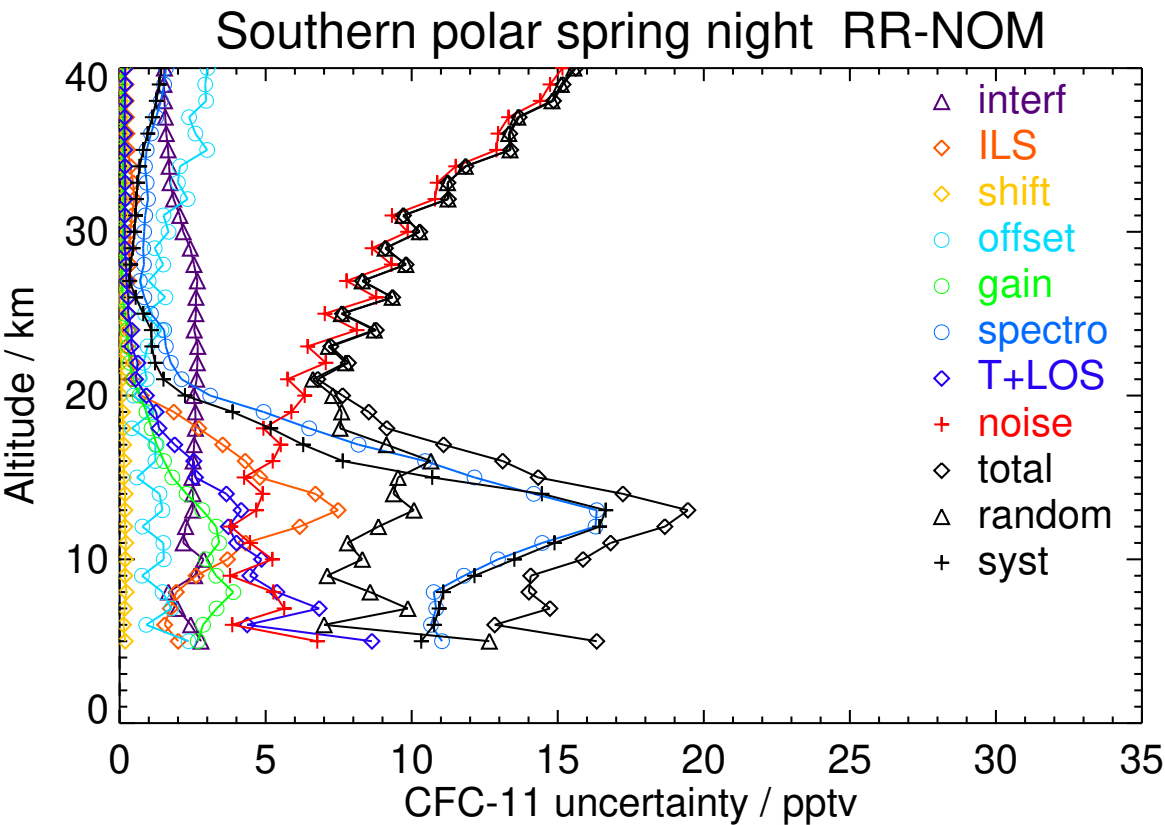

Figure S64. V8R\_F-11\_261 Southern polar spring night

**Table S66.** CFC-11 error budget for Southern polar summer day. All uncertainties are  $1\sigma$ .

| altitude<br>(km) | mean target<br>(pptv) | interf<br>(pptv) | ILS<br>(pptv) | shift<br>(pptv) | offset<br>(pptv) | gain<br>(pptv) | spectro<br>(pptv) | T+LOS<br>(pptv) | noise<br>(pptv) | random<br>(pptv) | syst<br>(pptv) | total<br>(pptv) |
|------------------|-----------------------|------------------|---------------|-----------------|------------------|----------------|-------------------|-----------------|-----------------|------------------|----------------|-----------------|
| 5                | 223.97                | 2.39             | 3.53          | 0.14            | 2.46             | 2.88           | 11.94             | 8.19            | 7.32            | 13.23            | 10.99          | 17.20           |
| 8                | 243.16                | 2.09             | 2.01          | 0.20            | 1.29             | 4.13           | 12.42             | 5.28            | 4.67            | 8.34             | 12.71          | 15.20           |
| 11               | 204.49                | 2.58             | 2.74          | 0.28            | 1.19             | 2.92           | 10.83             | 3.63            | 3.90            | 6.84             | 11.10          | 13.04           |
| 14               | 189.55                | 2.63             | 4.16          | 0.29            | 1.38             | 2.47           | 10.98             | 3.19            | 4.24            | 7.31             | 11.29          | 13.46           |
| 17               | 137.84                | 2.80             | 3.58          | 0.34            | 1.17             | 2.21           | 11.88             | 2.66            | 4.82            | 7.10             | 12.17          | 14.09           |
| 20               | 67.62                 | 2.64             | 0.74          | 0.23            | 0.44             | 1.58           | 8.00              | 1.65            | 5.73            | 6.83             | 7.95           | 10.48           |
| 23               | 19.02                 | 2.46             | 0.54          | 0.05            | 0.77             | 0.42           | 2.69              | 0.67            | 5.51            | 6.20             | 2.59           | 6.72            |
| 26               | 7.75                  | 2.48             | 0.29          | 0.05            | 1.87             | 0.07           | 0.82              | 0.33            | 8.51            | 9.09             | 0.41           | 9.10            |
| 29               | 6.69                  | 2.09             | 0.34          | 0.03            | 1.12             | 0.06           | 0.82              | 0.22            | 8.14            | 8.51             | 0.64           | 8.53            |
| 32               | 4.30                  | 1.63             | 0.57          | 0.10            | 2.35             | 0.08           | 0.73              | 0.21            | 10.38           | 10.80            | 0.61           | 10.81           |
| 35               | 4.58                  | 1.75             | 0.19          | 0.07            | 3.08             | 0.11           | 0.75              | 0.15            | 12.43           | 12.94            | 0.60           | 12.95           |
| 38               | 4.87                  | 1.40             | 0.18          | 0.03            | 2.84             | 0.09           | 1.38              | 0.14            | 13.68           | 14.05            | 1.30           | 14.11           |
| 41               | 5.66                  | 1.61             | 0.29          | 0.02            | 3.10             | 0.15           | 1.85              | 0.16            | 15.14           | 15.55            | 1.82           | 15.65           |

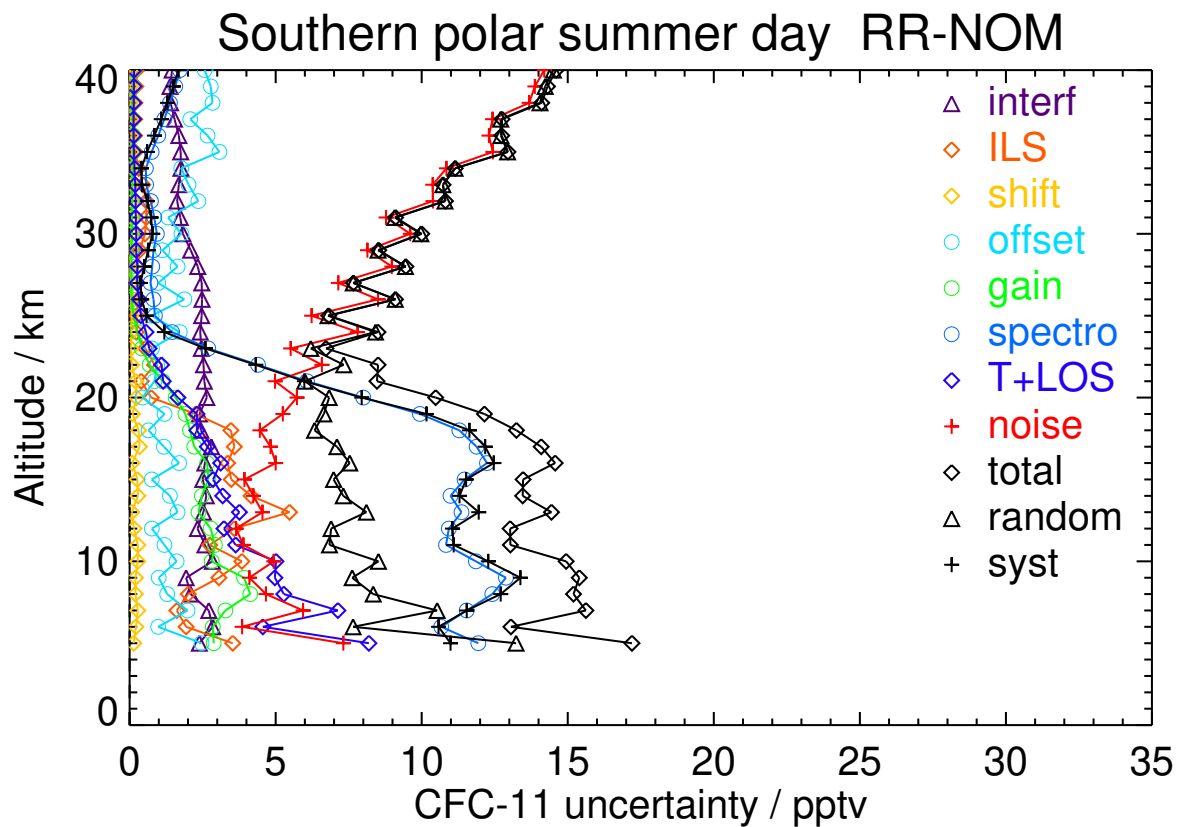

**Figure S65.** V8R\_F-11\_261 Southern polar summer day

**Table S67.** CFC-11 error budget for Southern polar summer night. All uncertainties are  $1\sigma$ .

| altitude<br>(km) | mean target<br>(pptv) | interf<br>(pptv) | ILS<br>(pptv) | shift<br>(pptv) | offset<br>(pptv) | gain<br>(pptv) | spectro<br>(pptv) | T+LOS<br>(pptv) | noise<br>(pptv) | random<br>(pptv) | syst<br>(pptv) | total<br>(pptv) |
|------------------|-----------------------|------------------|---------------|-----------------|------------------|----------------|-------------------|-----------------|-----------------|------------------|----------------|-----------------|
| 5                | 216.00                | 2.49             | 2.17          | 0.22            | 2.43             | 2.72           | 9.95              | 7.66            | 6.91            | 11.53            | 9.84           | 15.16           |
| 8                | 247.23                | 2.27             | 1.15          | 0.19            | 0.95             | 3.84           | 11.76             | 4.64            | 4.17            | 7.39             | 12.04          | 14.12           |
| 11               | 206.68                | 2.67             | 2.93          | 0.26            | 0.67             | 2.89           | 11.23             | 3.49            | 3.42            | 7.53             | 10.85          | 13.21           |
| 14               | 193.58                | 2.56             | 4.70          | 0.27            | 0.69             | 2.79           | 12.23             | 2.90            | 3.64            | 7.62             | 12.26          | 14.43           |
| 17               | 142.19                | 2.67             | 3.53          | 0.18            | 0.60             | 2.53           | 12.20             | 2.41            | 4.33            | 6.47             | 12.57          | 14.14           |
| 20               | 68.88                 | 2.54             | 0.91          | 0.17            | 0.60             | 1.57           | 8.25              | 1.54            | 5.37            | 6.50             | 8.19           | 10.46           |
| 23               | 22.02                 | 2.42             | 0.64          | 0.03            | 0.54             | 0.45           | 3.21              | 0.80            | 5.59            | 6.28             | 3.08           | 6.99            |
| 26               | 3.66                  | 2.43             | 0.23          | 0.04            | 1.65             | 0.06           | 0.79              | 0.31            | 8.32            | 8.85             | 0.38           | 8.86            |
| 29               | 4.88                  | 2.23             | 0.35          | 0.05            | 1.25             | 0.06           | 0.60              | 0.21            | 8.51            | 8.90             | 0.50           | 8.91            |
| 32               | 5.16                  | 1.54             | 0.32          | 0.08            | 2.18             | 0.09           | 0.66              | 0.18            | 10.34           | 10.70            | 0.37           | 10.71           |
| 35               | 6.18                  | 1.65             | 0.16          | 0.04            | 2.80             | 0.13           | 0.86              | 0.14            | 12.47           | 12.90            | 0.68           | 12.91           |
| 38               | 5.50                  | 1.44             | 0.20          | 0.02            | 2.79             | 0.10           | 1.42              | 0.14            | 13.86           | 14.22            | 1.34           | 14.28           |
| 41               | 4.87                  | 1.49             | 0.29          | 0.02            | 3.17             | 0.11           | 1.83              | 0.14            | 15.34           | 15.74            | 1.79           | 15.85           |

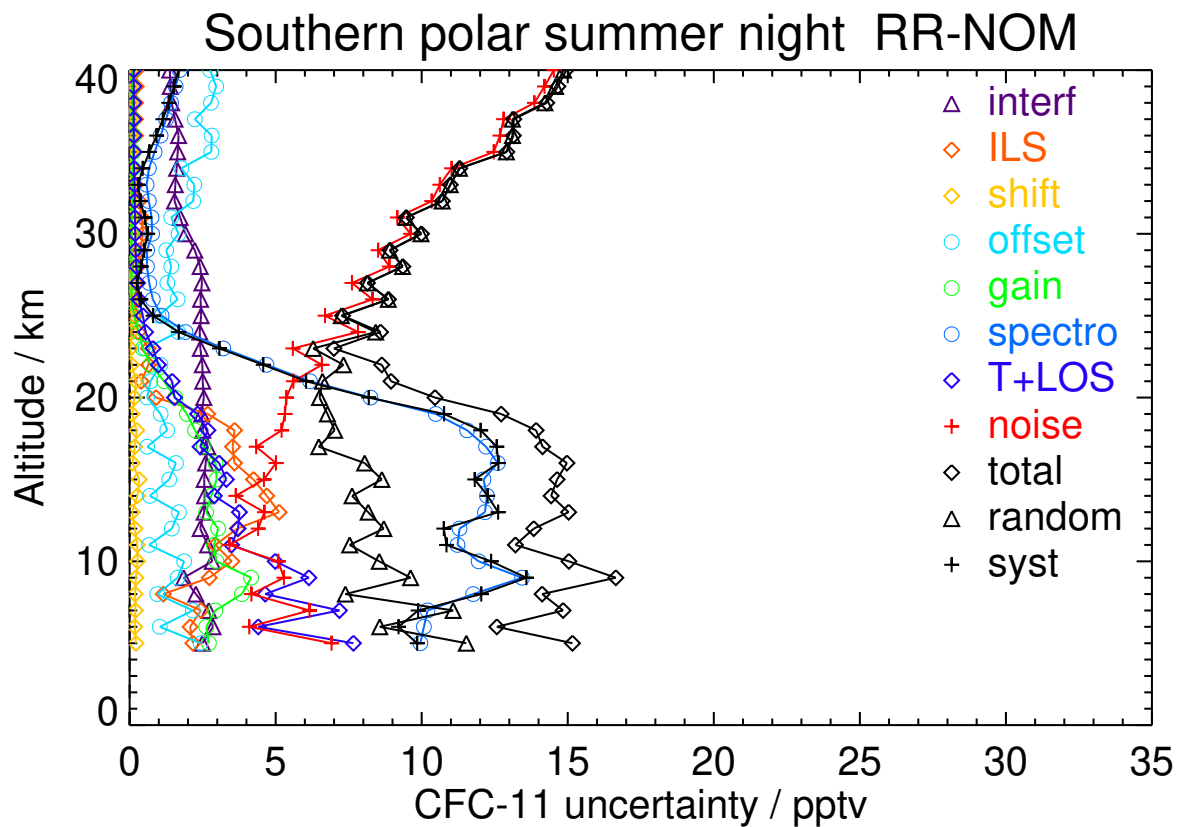

**Figure S66.** V8R\_F-11\_261 Southern polar summer night

**Table S68.** CFC-11 error budget for Southern polar autumn day. All uncertainties are  $1\sigma$ .

| altitude<br>(km) | mean target<br>(pptv) | interf<br>(pptv) | ILS<br>(pptv) | shift<br>(pptv) | offset<br>(pptv) | gain<br>(pptv) | spectro<br>(pptv) | T+LOS<br>(pptv) | noise<br>(pptv) | random<br>(pptv) | syst<br>(pptv) | total<br>(pptv) |
|------------------|-----------------------|------------------|---------------|-----------------|------------------|----------------|-------------------|-----------------|-----------------|------------------|----------------|-----------------|
| 5                | 229.71                | 2.65             | 2.16          | 0.50            | 2.74             | 3.30           | 13.64             | 9.61            | 7.58            | 15.17            | 11.67          | 19.14           |
| 8                | 235.07                | 1.99             | 1.39          | 0.25            | 1.18             | 4.38           | 11.99             | 5.29            | 4.61            | 7.98             | 12.49          | 14.82           |
| 11               | 215.50                | 2.47             | 1.46          | 0.26            | 1.28             | 3.11           | 10.52             | 3.71            | 4.16            | 6.68             | 10.81          | 12.71           |
| 14               | 196.95                | 2.66             | 2.90          | 0.35            | 1.34             | 3.13           | 12.79             | 3.53            | 4.63            | 7.11             | 13.19          | 14.99           |
| 17               | 123.43                | 2.57             | 3.01          | 0.12            | 0.99             | 2.53           | 12.28             | 2.72            | 5.38            | 7.05             | 12.67          | 14.50           |
| 20               | 51.83                 | 2.38             | 0.75          | 0.14            | 0.60             | 1.59           | 8.02              | 1.50            | 6.45            | 7.61             | 7.70           | 10.83           |
| 23               | 9.42                  | 2.41             | 0.29          | 0.05            | 1.05             | 0.35           | 2.51              | 0.61            | 7.01            | 7.66             | 2.08           | 7.93            |
| 26               | 6.47                  | 2.37             | 0.23          | 0.03            | 1.75             | 0.13           | 1.25              | 0.35            | 9.76            | 10.24            | 0.87           | 10.28           |
| 29               | 11.67                 | 2.12             | 0.29          | 0.07            | 1.80             | 0.15           | 1.43              | 0.29            | 10.65           | 11.05            | 1.14           | 11.11           |
| 32               | 3.59                  | 1.54             | 0.28          | 0.06            | 2.52             | 0.12           | 0.92              | 0.25            | 13.25           | 13.60            | 0.47           | 13.61           |
| 35               | -1.26                 | 1.15             | 0.13          | 0.02            | 3.26             | 0.11           | 1.13              | 0.18            | 15.65           | 16.04            | 0.99           | 16.07           |
| 38               | -2.80                 | 1.09             | 0.18          | 0.02            | 4.37             | 0.11           | 2.02              | 0.19            | 17.65           | 18.22            | 1.98           | 18.33           |
| 41               | -1.42                 | 1.22             | 0.30          | 0.02            | 7.01             | 0.09           | 2.65              | 0.23            | 19.24           | 20.52            | 2.63           | 20.69           |

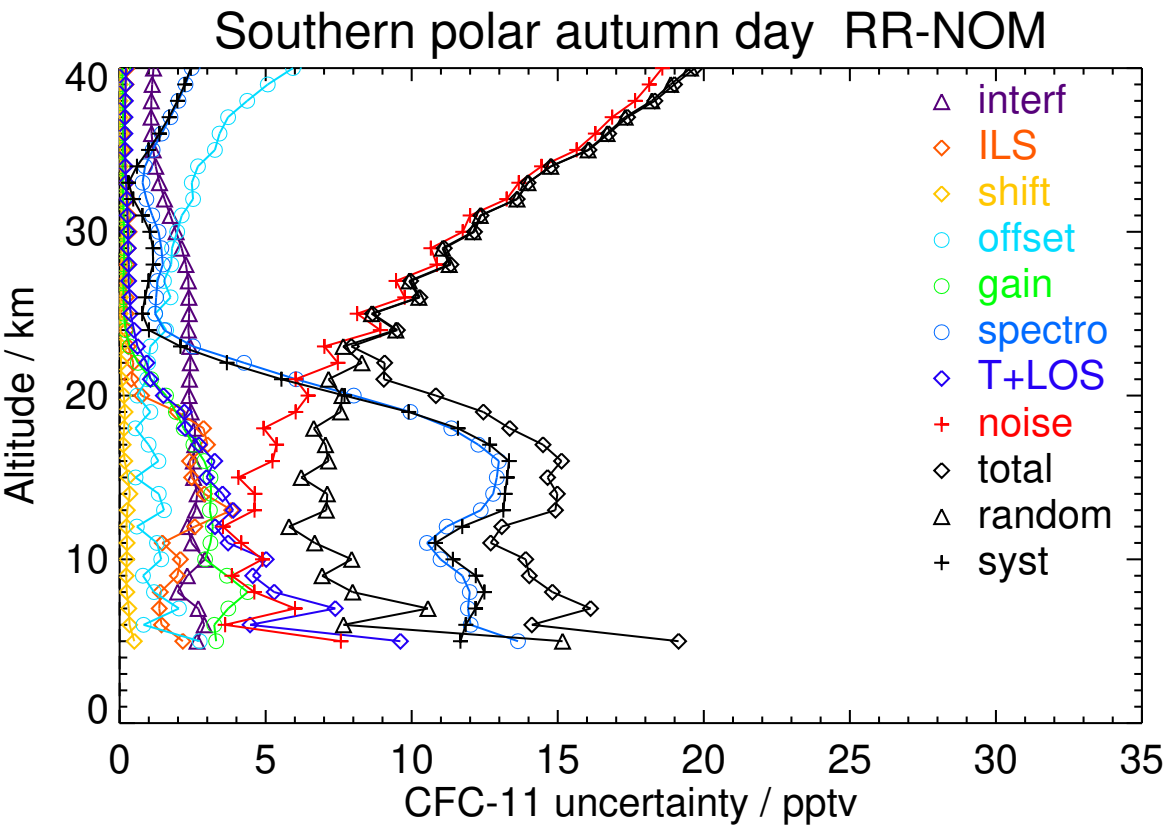

**Figure S67.** V8R\_F-11\_261 Southern polar autumn day

Table S69. CFC-11 error budget for Southern polar autumn night. All uncertainties are  $1\sigma$ .

| altitude<br>(km) | mean target<br>(pptv) | interf<br>(pptv) | ILS<br>(pptv) | shift<br>(pptv) | offset<br>(pptv) | gain<br>(pptv) | spectro<br>(pptv) | T+LOS<br>(pptv) | noise<br>(pptv) | random<br>(pptv) | syst<br>(pptv) | total<br>(pptv) |
|------------------|-----------------------|------------------|---------------|-----------------|------------------|----------------|-------------------|-----------------|-----------------|------------------|----------------|-----------------|
| 5                | 231.29                | 2.85             | 2.46          | 0.34            | 2.18             | 3.05           | 12.82             | 7.90            | 6.45            | 12.65            | 11.70          | 17.23           |
| 8                | 238.24                | 2.08             | 1.46          | 0.26            | 1.60             | 3.77           | 10.46             | 5.98            | 5.31            | 8.94             | 10.81          | 14.02           |
| 11               | 218.60                | 2.35             | 1.46          | 0.24            | 1.52             | 3.03           | 11.09             | 3.83            | 4.36            | 6.81             | 11.38          | 13.26           |
| 14               | 194.40                | 2.61             | 2.90          | 0.35            | 1.28             | 2.98           | 13.04             | 3.64            | 4.72            | 7.21             | 13.40          | 15.22           |
| 17               | 107.87                | 2.58             | 3.28          | 0.18            | 0.93             | 2.43           | 13.46             | 2.78            | 5.48            | 7.34             | 13.76          | 15.59           |
| 20               | 29.62                 | 2.37             | 0.80          | 0.10            | 0.65             | 0.94           | 5.47              | 1.30            | 6.54            | 7.42             | 5.18           | 9.05            |
| 23               | 6.34                  | 2.42             | 0.23          | 0.05            | 1.09             | 0.16           | 1.70              | 0.53            | 7.23            | 7.80             | 1.30           | 7.91            |
| 26               | 9.39                  | 2.39             | 0.18          | 0.04            | 1.73             | 0.14           | 1.53              | 0.37            | 9.98            | 10.45            | 1.31           | 10.53           |
| 29               | 6.39                  | 2.11             | 0.28          | 0.07            | 1.87             | 0.12           | 1.29              | 0.31            | 11.00           | 11.37            | 1.15           | 11.43           |
| 32               | 0.60                  | 1.56             | 0.19          | 0.04            | 2.57             | 0.06           | 0.56              | 0.21            | 13.52           | 13.86            | 0.25           | 13.87           |
| 35               | -1.02                 | 1.17             | 0.13          | 0.02            | 3.35             | 0.06           | 1.44              | 0.17            | 15.92           | 16.32            | 1.36           | 16.38           |
| 38               | 2.66                  | 1.10             | 0.23          | 0.02            | 4.56             | 0.06           | 2.21              | 0.20            | 17.89           | 18.50            | 2.18           | 18.63           |
| 41               | 4.24                  | 1.30             | 0.32          | 0.03            | 7.29             | 0.07           | 2.68              | 0.24            | 19.49           | 20.86            | 2.67           | 21.03           |

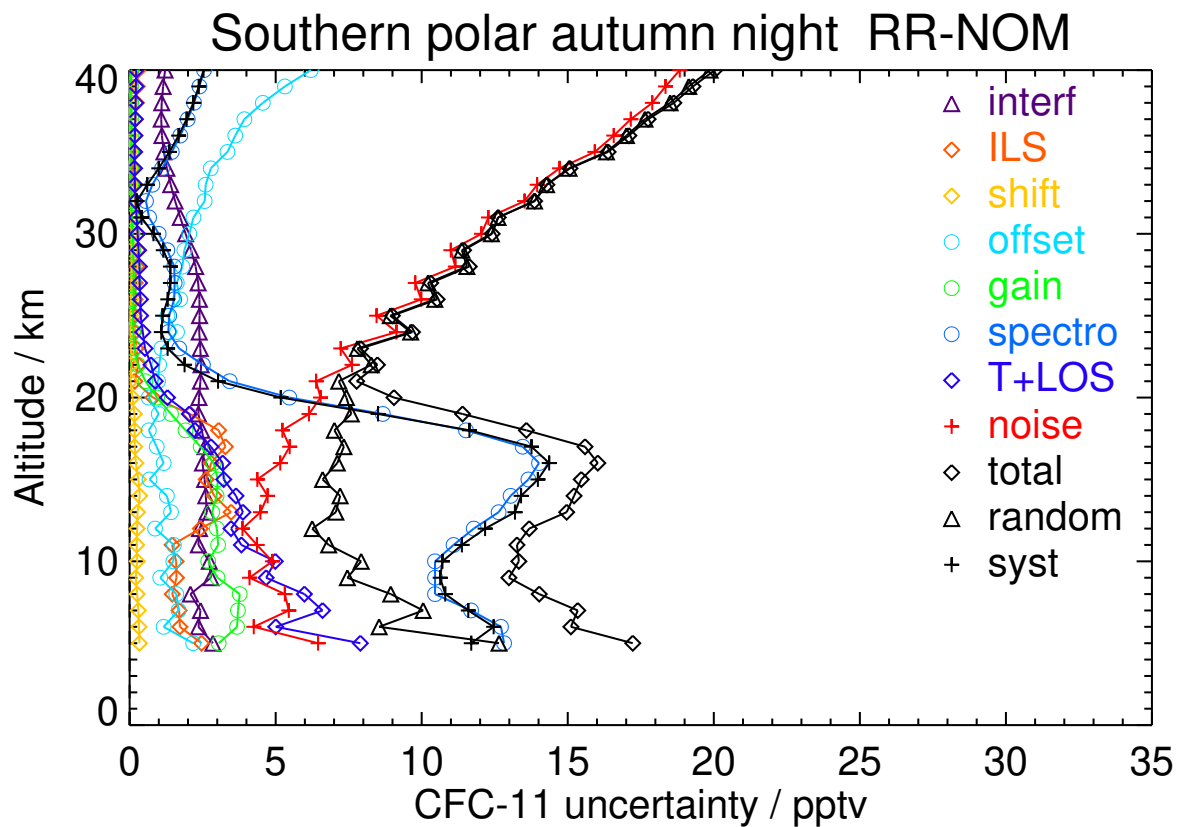

Figure S68. V8R\_F-11\_261 Southern polar autumn night

**Table S70.** CFC-11 error budget for Northern polar winter day. All uncertainties are  $1\sigma$ .

| altitude<br>(km) | mean target<br>(pptv) | interf<br>(pptv) | ILS<br>(pptv) | shift<br>(pptv) | offset<br>(pptv) | gain<br>(pptv) | spectro<br>(pptv) | T+LOS<br>(pptv) | noise<br>(pptv) | random<br>(pptv) | syst<br>(pptv) | total<br>(pptv) |
|------------------|-----------------------|------------------|---------------|-----------------|------------------|----------------|-------------------|-----------------|-----------------|------------------|----------------|-----------------|
| 14               | 24.48                 | 2.15             | 0.40          | 0.03            | 2.42             | 1.12           | 6.61              | 0.86            | 5.14            | 8.33             | 3.65           | 9.09            |
| 17               | 94.75                 | 3.66             | 0.40          | 0.03            | 1.09             | 1.78           | 7.52              | 0.87            | 3.38            | 7.01             | 6.12           | 9.31            |
| 20               | 55.05                 | 2.73             | 0.33          | 0.07            | 0.88             | 1.37           | 6.15              | 0.68            | 3.73            | 5.86             | 5.29           | 7.89            |
| 23               | 17.60                 | 2.54             | 0.12          | 0.02            | 1.36             | 0.53           | 2.76              | 0.42            | 5.42            | 6.38             | 2.24           | 6.77            |
| 26               | 13.84                 | 2.30             | 0.26          | 0.02            | 2.06             | 0.14           | 1.04              | 0.26            | 7.48            | 8.15             | 0.53           | 8.17            |
| 29               | 14.73                 | 1.93             | 0.14          | 0.03            | 2.62             | 0.18           | 1.29              | 0.25            | 9.92            | 10.48            | 1.00           | 10.52           |
| 32               | 12.39                 | 1.28             | 0.18          | 0.05            | 2.74             | 0.19           | 1.24              | 0.22            | 12.29           | 12.69            | 0.91           | 12.72           |
| 35               | 6.40                  | 0.81             | 0.10          | 0.03            | 2.91             | 0.12           | 0.87              | 0.16            | 14.43           | 14.76            | 0.51           | 14.77           |
| 38               | 1.89                  | 0.54             | 0.06          | 0.02            | 4.31             | 0.07           | 1.60              | 0.15            | 16.62           | 17.19            | 1.45           | 17.25           |
| 41               | 1.68                  | 0.40             | 0.08          | 0.01            | 7.82             | 0.06           | 2.04              | 0.16            | 19.28           | 20.82            | 1.95           | 20.91           |
| 44               | 3.13                  | 0.36             | 0.11          | 0.01            | 13.18            | 0.07           | 2.24              | 0.17            | 23.31           | 26.79            | 2.15           | 26.88           |
| 47               | 3.32                  | 0.36             | 0.12          | 0.02            | 19.40            | 0.09           | 2.34              | 0.17            | 28.83           | 34.76            | 2.21           | 34.83           |
| 50               | 2.63                  | 0.36             | 0.13          | 0.02            | 25.53            | 0.10           | 2.37              | 0.18            | 34.66           | 43.06            | 2.22           | 43.12           |
| 53               | 9.68                  | 0.36             | 0.16          | 0.02            | 30.31            | 0.13           | 2.41              | 0.20            | 39.25           | 49.60            | 2.23           | 49.65           |
| 56               | 9.76                  | 0.34             | 0.22          | 0.02            | 32.94            | 0.13           | 2.43              | 0.20            | 41.64           | 53.11            | 2.22           | 53.16           |
| 62               | -53.18                | 0.43             | 0.04          | <0.01           | 39.18            | 0.19           | 2.63              | 0.29            | 47.34           | 61.45            | 2.64           | 61.51           |

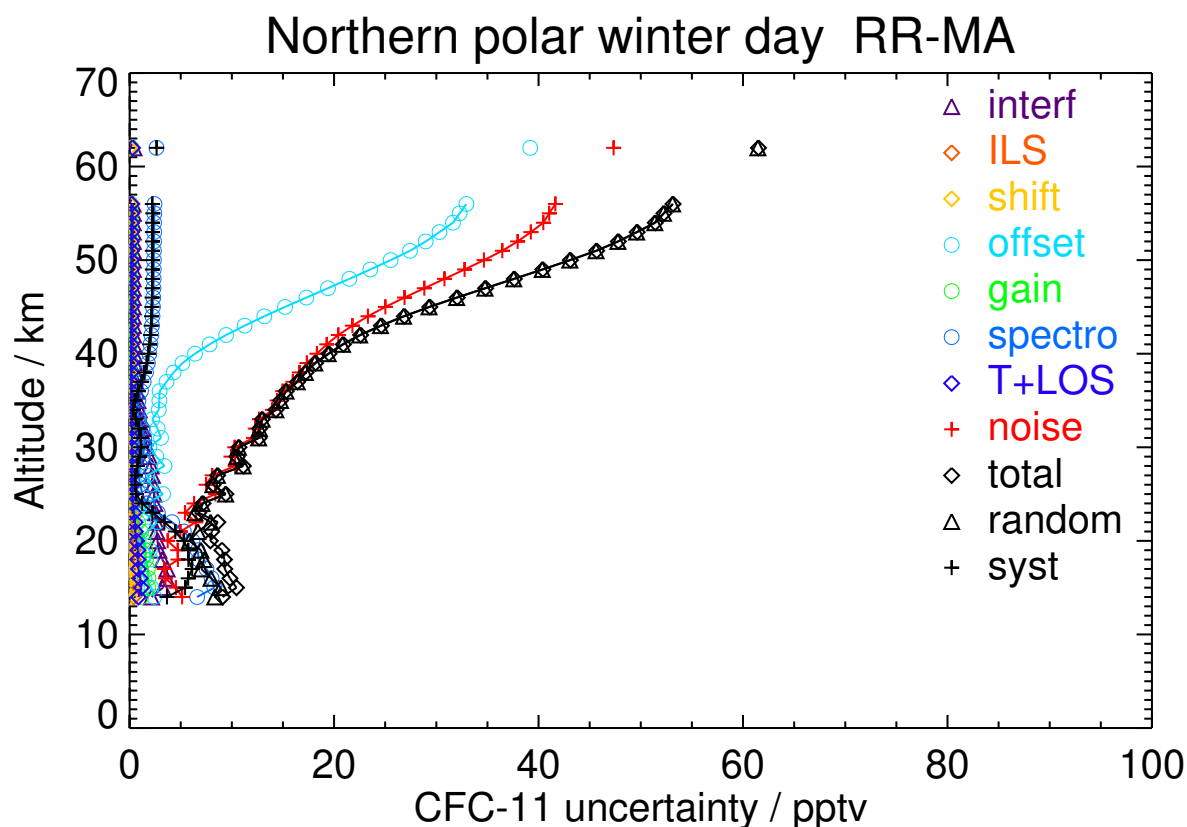**Figure S69.** V8R\_F-11\_561 Northern polar winter day

**Table S71.** CFC-11 error budget for Northern polar winter night. All uncertainties are  $1\sigma$ .

| altitude<br>(km) | mean target<br>(pptv) | interf<br>(pptv) | ILS<br>(pptv) | shift<br>(pptv) | offset<br>(pptv) | gain<br>(pptv) | spectro<br>(pptv) | T+LOS<br>(pptv) | noise<br>(pptv) | random<br>(pptv) | syst<br>(pptv) | total<br>(pptv) |
|------------------|-----------------------|------------------|---------------|-----------------|------------------|----------------|-------------------|-----------------|-----------------|------------------|----------------|-----------------|
| 14               | 149.68                | 4.04             | 0.35          | 0.17            | 2.29             | 2.30           | 10.71             | 1.52            | 4.81            | 7.35             | 10.63          | 12.92           |
| 17               | 80.51                 | 3.29             | 0.88          | 0.08            | 2.73             | 1.62           | 7.76              | 1.15            | 6.52            | 9.21             | 6.40           | 11.21           |
| 20               | 42.28                 | 2.74             | 0.59          | 0.06            | 1.34             | 0.97           | 5.28              | 0.78            | 5.17            | 6.61             | 4.71           | 8.11            |
| 23               | 7.61                  | 2.50             | 0.27          | 0.02            | 1.67             | 0.49           | 3.04              | 0.52            | 7.33            | 8.16             | 2.44           | 8.52            |
| 26               | 6.73                  | 2.34             | 0.21          | 0.03            | 2.40             | 0.13           | 1.21              | 0.31            | 9.92            | 10.51            | 0.87           | 10.55           |
| 29               | 7.06                  | 2.01             | 0.18          | 0.03            | 2.71             | 0.13           | 1.10              | 0.22            | 12.10           | 12.60            | 0.61           | 12.61           |
| 32               | -0.41                 | 1.42             | 0.13          | 0.02            | 2.94             | 0.10           | 0.93              | 0.17            | 14.13           | 14.53            | 0.29           | 14.54           |
| 35               | 0.68                  | 0.94             | 0.17          | 0.01            | 3.46             | 0.07           | 1.25              | 0.16            | 16.08           | 16.48            | 1.11           | 16.52           |
| 38               | 4.04                  | 0.66             | 0.21          | 0.01            | 5.15             | 0.08           | 1.72              | 0.18            | 18.03           | 18.77            | 1.65           | 18.84           |
| 41               | 5.04                  | 0.52             | 0.24          | 0.01            | 8.49             | 0.11           | 2.04              | 0.20            | 20.23           | 21.95            | 1.98           | 22.04           |
| 44               | 8.77                  | 0.49             | 0.25          | 0.01            | 13.38            | 0.14           | 2.26              | 0.22            | 23.45           | 27.01            | 2.18           | 27.10           |
| 47               | 10.98                 | 0.51             | 0.25          | 0.02            | 19.20            | 0.17           | 2.39              | 0.24            | 28.03           | 33.99            | 2.27           | 34.07           |
| 50               | 13.01                 | 0.52             | 0.25          | 0.02            | 25.18            | 0.20           | 2.44              | 0.25            | 33.41           | 41.85            | 2.31           | 41.91           |
| 53               | 13.90                 | 0.55             | 0.26          | 0.02            | 30.03            | 0.23           | 2.52              | 0.27            | 37.91           | 48.37            | 2.38           | 48.43           |
| 56               | 20.47                 | 0.61             | 0.31          | 0.02            | 33.99            | 0.30           | 2.56              | 0.31            | 41.35           | 53.54            | 2.43           | 53.60           |
| 62               | 17.15                 | 0.55             | 0.30          | 0.02            | 41.50            | 0.39           | 2.58              | 0.35            | 48.20           | 63.62            | 2.41           | 63.66           |

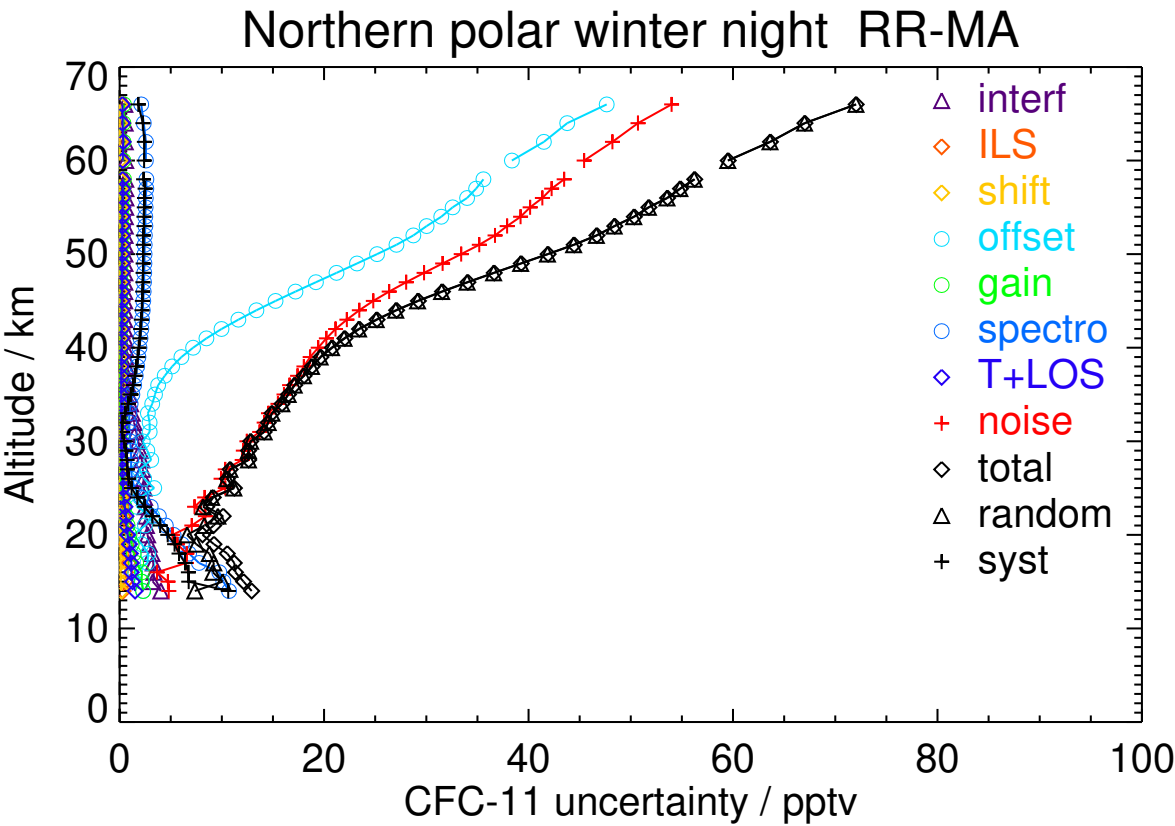

**Figure S70.** V8R\_F-11\_561 Northern polar winter night

**Table S72.** CFC-11 error budget for Northern polar spring day. All uncertainties are  $1\sigma$ .

| altitude<br>(km) | mean target<br>(pptv) | interf<br>(pptv) | ILS<br>(pptv) | shift<br>(pptv) | offset<br>(pptv) | gain<br>(pptv) | spectro<br>(pptv) | T+LOS<br>(pptv) | noise<br>(pptv) | random<br>(pptv) | syst<br>(pptv) | total<br>(pptv) |
|------------------|-----------------------|------------------|---------------|-----------------|------------------|----------------|-------------------|-----------------|-----------------|------------------|----------------|-----------------|
| 17               | 70.31                 | 3.06             | 0.60          | 0.07            | 3.20             | 1.00           | 6.00              | 0.98            | 7.10            | 8.73             | 5.65           | 10.40           |
| 20               | 39.36                 | 2.82             | 0.48          | 0.04            | 1.33             | 0.69           | 4.54              | 0.67            | 4.62            | 5.79             | 4.39           | 7.27            |
| 23               | 8.19                  | 2.53             | 0.16          | 0.03            | 0.89             | 0.20           | 1.70              | 0.37            | 5.81            | 6.46             | 1.52           | 6.64            |
| 26               | 9.83                  | 2.40             | 0.14          | 0.01            | 1.41             | 0.10           | 0.84              | 0.22            | 8.17            | 8.67             | 0.46           | 8.68            |
| 29               | 4.45                  | 2.09             | 0.34          | 0.06            | 1.95             | 0.11           | 1.10              | 0.22            | 10.57           | 10.98            | 0.88           | 11.01           |
| 32               | 0.70                  | 1.48             | 0.27          | 0.07            | 2.28             | 0.08           | 0.70              | 0.16            | 12.59           | 12.90            | 0.37           | 12.90           |
| 35               | -0.94                 | 1.03             | 0.13          | 0.04            | 2.63             | 0.06           | 0.98              | 0.12            | 14.30           | 14.59            | 0.79           | 14.61           |
| 38               | 0.29                  | 0.78             | 0.08          | 0.03            | 3.29             | 0.09           | 1.65              | 0.14            | 15.87           | 16.24            | 1.58           | 16.32           |
| 41               | 2.99                  | 0.66             | 0.09          | 0.03            | 4.52             | 0.12           | 2.03              | 0.16            | 17.33           | 17.93            | 1.98           | 18.04           |
| 44               | 6.68                  | 0.65             | 0.10          | 0.02            | 6.84             | 0.16           | 2.14              | 0.16            | 18.78           | 20.01            | 2.08           | 20.12           |
| 47               | 8.55                  | 0.66             | 0.10          | 0.02            | 10.63            | 0.18           | 2.12              | 0.16            | 21.14           | 23.68            | 2.03           | 23.77           |
| 50               | 9.26                  | 0.65             | 0.10          | 0.02            | 15.65            | 0.21           | 2.07              | 0.17            | 25.26           | 29.74            | 1.94           | 29.80           |
| 53               | 8.97                  | 0.61             | 0.09          | 0.02            | 21.15            | 0.23           | 2.01              | 0.17            | 30.82           | 37.39            | 1.85           | 37.44           |
| 56               | 10.28                 | 0.55             | 0.10          | 0.03            | 26.24            | 0.27           | 1.97              | 0.17            | 36.34           | 44.84            | 1.79           | 44.87           |
| 59               | 10.75                 | 0.49             | 0.11          | 0.03            | 30.30            | 0.31           | 1.95              | 0.17            | 40.71           | 50.76            | 1.76           | 50.79           |
| 62               | 11.31                 | 0.41             | 0.13          | 0.03            | 34.82            | 0.38           | 1.93              | 0.18            | 45.84           | 57.58            | 1.74           | 57.60           |

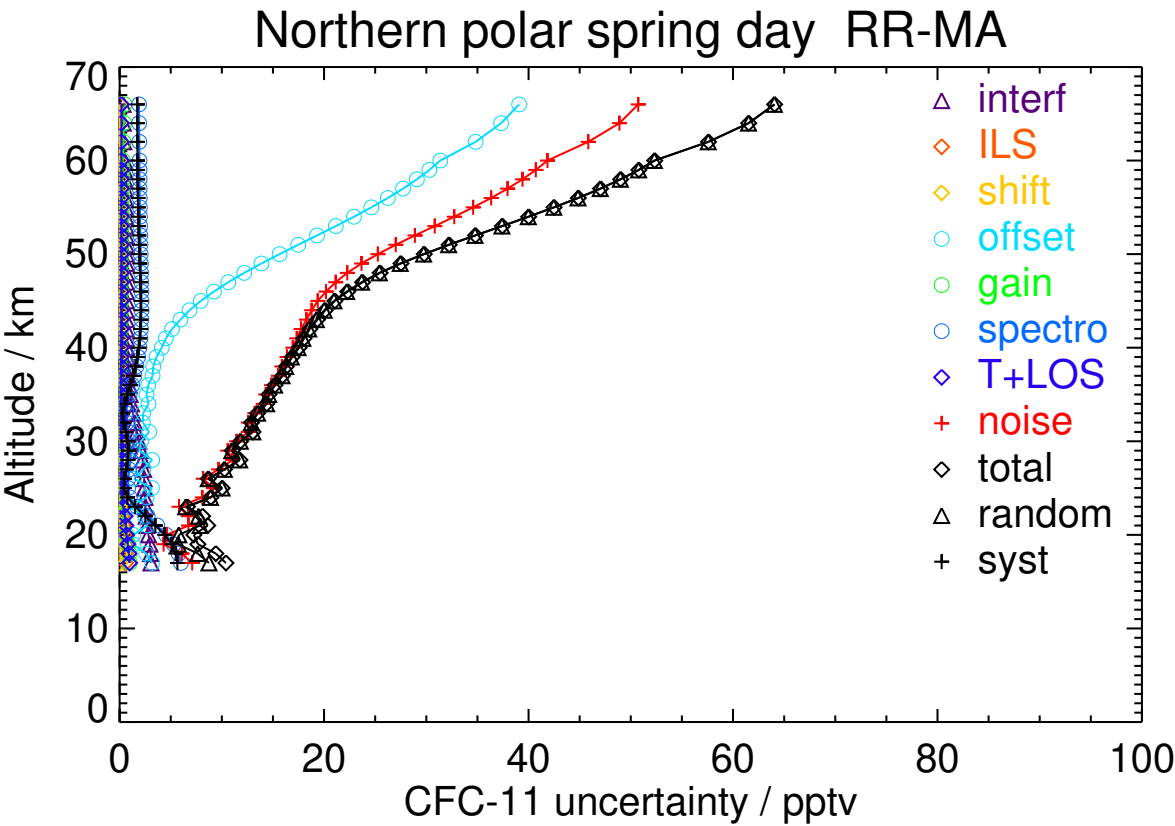

**Figure S71.** V8R\_F-11\_561 Northern polar spring day

Table S73. CFC-11 error budget for Northern polar spring night. All uncertainties are  $1\sigma$ .

| altitude<br>(km) | mean target<br>(pptv) | interf<br>(pptv) | ILS<br>(pptv) | shift<br>(pptv) | offset<br>(pptv) | gain<br>(pptv) | spectro<br>(pptv) | T+LOS<br>(pptv) | noise<br>(pptv) | random<br>(pptv) | syst<br>(pptv) | total<br>(pptv) |
|------------------|-----------------------|------------------|---------------|-----------------|------------------|----------------|-------------------|-----------------|-----------------|------------------|----------------|-----------------|
| 17               | 85.47                 | 3.06             | 0.66          | 0.07            | 3.12             | 1.23           | 6.82              | 1.13            | 6.95            | 8.51             | 6.68           | 10.82           |
| 20               | 50.16                 | 2.82             | 0.56          | 0.04            | 1.24             | 0.87           | 5.46              | 0.79            | 4.47            | 5.77             | 5.25           | 7.81            |
| 23               | 11.45                 | 2.54             | 0.21          | 0.02            | 0.93             | 0.31           | 2.60              | 0.47            | 5.76            | 6.51             | 2.30           | 6.90            |
| 26               | 8.56                  | 2.41             | 0.15          | 0.02            | 1.44             | 0.11           | 0.98              | 0.24            | 8.05            | 8.56             | 0.69           | 8.59            |
| 29               | 0.75                  | 2.12             | 0.36          | 0.06            | 1.95             | 0.10           | 1.03              | 0.21            | 10.38           | 10.80            | 0.78           | 10.83           |
| 32               | -1.38                 | 1.49             | 0.23          | 0.06            | 2.27             | 0.06           | 0.59              | 0.13            | 12.29           | 12.60            | 0.28           | 12.60           |
| 35               | 3.01                  | 1.03             | 0.12          | 0.04            | 2.59             | 0.05           | 1.14              | 0.12            | 13.94           | 14.23            | 1.02           | 14.26           |
| 38               | 5.32                  | 0.77             | 0.08          | 0.03            | 3.16             | 0.08           | 1.77              | 0.14            | 15.56           | 15.90            | 1.71           | 16.00           |
| 41               | 5.39                  | 0.65             | 0.10          | 0.03            | 4.34             | 0.11           | 2.04              | 0.16            | 17.07           | 17.63            | 1.99           | 17.74           |
| 44               | 2.18                  | 0.64             | 0.11          | 0.02            | 6.64             | 0.14           | 2.09              | 0.16            | 18.59           | 19.75            | 2.04           | 19.86           |
| 47               | 2.58                  | 0.64             | 0.10          | 0.01            | 10.45            | 0.17           | 2.03              | 0.15            | 21.00           | 23.47            | 1.97           | 23.55           |
| 50               | 4.65                  | 0.62             | 0.10          | 0.01            | 15.52            | 0.19           | 1.94              | 0.16            | 25.26           | 29.65            | 1.86           | 29.71           |
| 53               | 5.77                  | 0.57             | 0.11          | 0.02            | 21.05            | 0.21           | 1.86              | 0.16            | 30.88           | 37.38            | 1.76           | 37.42           |
| 56               | 6.00                  | 0.51             | 0.12          | 0.02            | 26.16            | 0.25           | 1.80              | 0.16            | 36.38           | 44.82            | 1.68           | 44.85           |
| 59               | 5.51                  | 0.45             | 0.13          | 0.02            | 30.17            | 0.29           | 1.76              | 0.17            | 40.68           | 50.66            | 1.64           | 50.68           |
| 62               | 4.53                  | 0.37             | 0.14          | 0.02            | 34.70            | 0.36           | 1.71              | 0.20            | 45.68           | 57.37            | 1.59           | 57.39           |

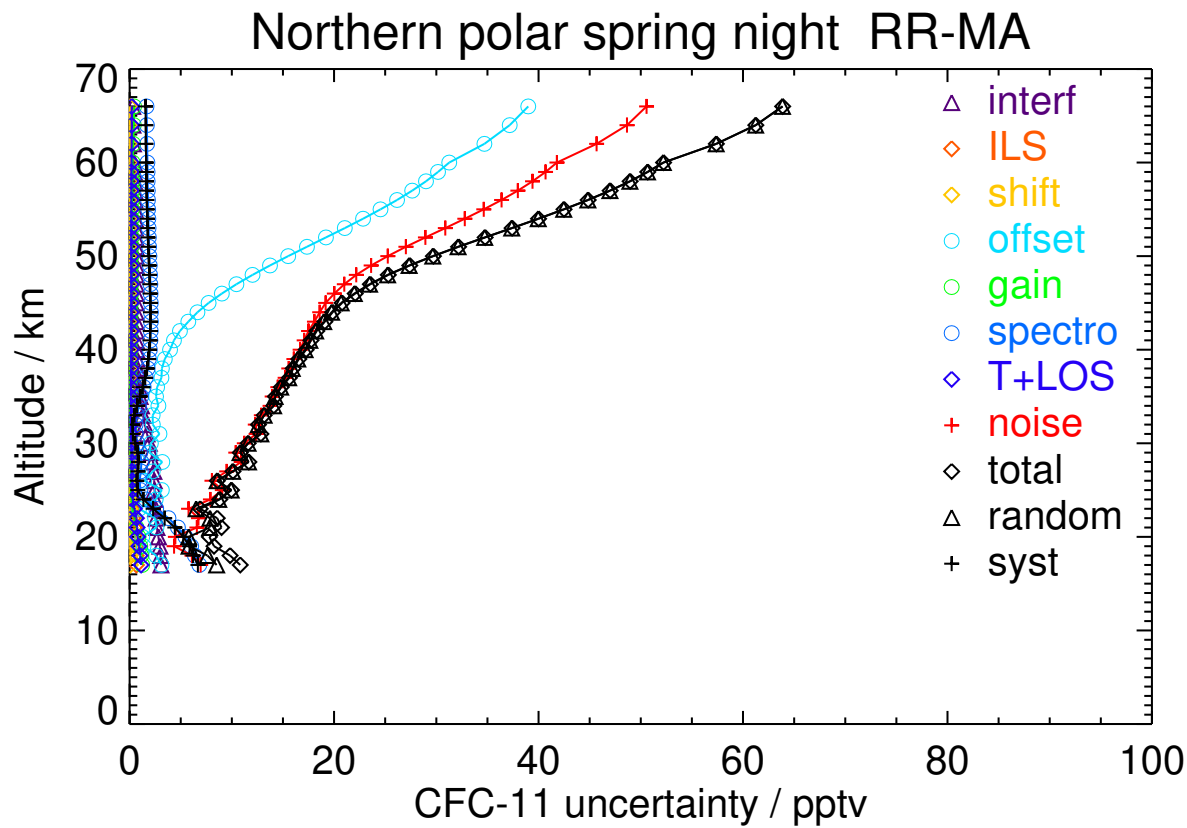

Figure S72. V8R\_F-11\_561 Northern polar spring night

**Table S74.** CFC-11 error budget for Northern polar summer day. All uncertainties are  $1\sigma$ .

| altitude<br>(km) | mean target<br>(pptv) | interf<br>(pptv) | ILS<br>(pptv) | shift<br>(pptv) | offset<br>(pptv) | gain<br>(pptv) | spectro<br>(pptv) | T+LOS<br>(pptv) | noise<br>(pptv) | random<br>(pptv) | syst<br>(pptv) | total<br>(pptv) |
|------------------|-----------------------|------------------|---------------|-----------------|------------------|----------------|-------------------|-----------------|-----------------|------------------|----------------|-----------------|
| 17               | 147.63                | 2.94             | 0.56          | 0.15            | 2.62             | 2.21           | 10.58             | 1.69            | 5.88            | 7.48             | 10.68          | 13.04           |
| 20               | 91.30                 | 2.98             | 0.64          | 0.04            | 0.99             | 1.75           | 8.96              | 1.22            | 3.57            | 4.99             | 9.10           | 10.38           |
| 23               | 19.24                 | 2.53             | 0.21          | 0.04            | 0.61             | 0.63           | 3.99              | 0.67            | 4.50            | 5.29             | 3.99           | 6.62            |
| 26               | 8.37                  | 2.44             | 0.13          | 0.06            | 0.93             | 0.08           | 0.72              | 0.26            | 6.13            | 6.70             | 0.33           | 6.71            |
| 29               | 3.55                  | 2.11             | 0.28          | 0.04            | 1.45             | 0.06           | 0.79              | 0.20            | 7.88            | 8.30             | 0.67           | 8.33            |
| 32               | 2.59                  | 1.48             | 0.38          | 0.07            | 1.90             | 0.05           | 0.50              | 0.16            | 9.65            | 9.96             | 0.42           | 9.97            |
| 35               | 3.99                  | 1.14             | 0.22          | 0.07            | 2.24             | 0.05           | 0.70              | 0.13            | 11.47           | 11.75            | 0.48           | 11.76           |
| 38               | 4.98                  | 0.79             | 0.11          | 0.04            | 2.44             | 0.07           | 1.16              | 0.13            | 13.02           | 13.28            | 1.09           | 13.32           |
| 41               | 0.25                  | 0.70             | 0.13          | 0.04            | 2.79             | 0.08           | 1.59              | 0.14            | 14.59           | 14.88            | 1.55           | 14.96           |
| 44               | -4.76                 | 0.72             | 0.11          | 0.04            | 3.66             | 0.11           | 1.83              | 0.14            | 16.10           | 16.53            | 1.81           | 16.63           |
| 47               | -6.81                 | 0.67             | 0.10          | 0.03            | 5.45             | 0.14           | 1.80              | 0.14            | 17.55           | 18.39            | 1.78           | 18.47           |
| 50               | -6.70                 | 0.63             | 0.10          | 0.02            | 8.80             | 0.15           | 1.67              | 0.14            | 19.68           | 21.57            | 1.64           | 21.63           |
| 53               | -5.67                 | 0.58             | 0.10          | 0.03            | 13.54            | 0.16           | 1.54              | 0.14            | 23.71           | 27.31            | 1.49           | 27.35           |
| 56               | -5.40                 | 0.49             | 0.09          | 0.03            | 18.74            | 0.20           | 1.47              | 0.14            | 29.21           | 34.71            | 1.39           | 34.74           |
| 59               | -4.14                 | 0.38             | 0.08          | 0.04            | 23.35            | 0.25           | 1.44              | 0.14            | 34.57           | 41.72            | 1.34           | 41.75           |
| 62               | -1.59                 | 0.24             | 0.10          | 0.04            | 28.78            | 0.36           | 1.44              | 0.15            | 42.10           | 51.00            | 1.34           | 51.02           |

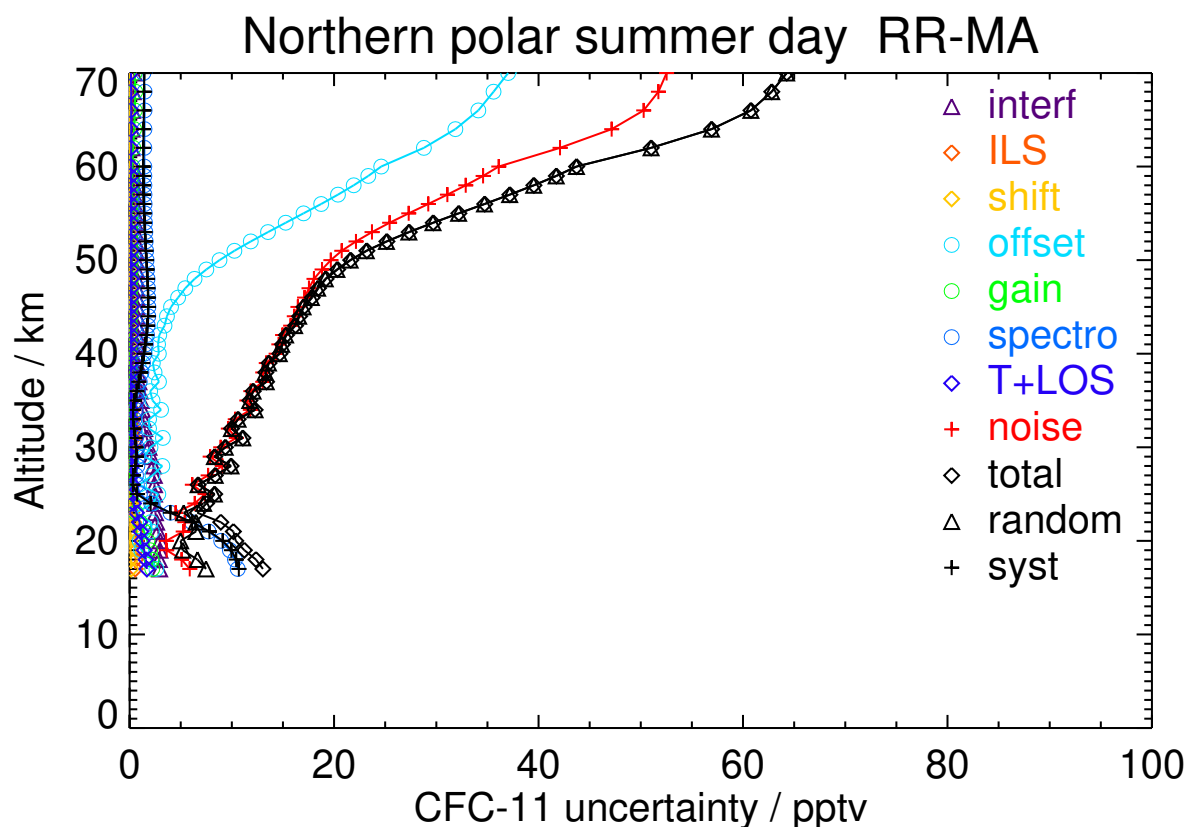**Figure S73.** V8R\_F-11\_561 Northern polar summer day

Table S75. CFC-11 error budget for Northern polar summer night. All uncertainties are  $1\sigma$ .

| altitude<br>(km) | mean target<br>(pptv) | interf<br>(pptv) | ILS<br>(pptv) | shift<br>(pptv) | offset<br>(pptv) | gain<br>(pptv) | spectro<br>(pptv) | T+LOS<br>(pptv) | noise<br>(pptv) | random<br>(pptv) | syst<br>(pptv) | total<br>(pptv) |
|------------------|-----------------------|------------------|---------------|-----------------|------------------|----------------|-------------------|-----------------|-----------------|------------------|----------------|-----------------|
| 17               | 146.41                | 3.04             | 0.85          | 0.06            | 2.79             | 2.24           | 10.93             | 1.71            | 6.13            | 7.87             | 10.99          | 13.52           |
| 20               | 87.10                 | 2.85             | 0.83          | 0.03            | 0.99             | 1.68           | 8.74              | 1.19            | 3.74            | 5.09             | 8.86           | 10.22           |
| 23               | 18.49                 | 2.57             | 0.33          | 0.03            | 0.76             | 0.60           | 4.20              | 0.71            | 4.86            | 5.67             | 4.17           | 7.03            |
| 26               | 6.01                  | 2.37             | 0.15          | 0.04            | 1.25             | 0.10           | 0.87              | 0.28            | 6.74            | 7.30             | 0.33           | 7.31            |
| 29               | 5.79                  | 2.13             | 0.23          | 0.05            | 1.79             | 0.07           | 0.78              | 0.20            | 8.70            | 9.16             | 0.48           | 9.17            |
| 32               | 7.71                  | 1.47             | 0.32          | 0.08            | 2.18             | 0.09           | 0.80              | 0.16            | 10.67           | 11.02            | 0.46           | 11.03           |
| 35               | 5.17                  | 0.99             | 0.22          | 0.07            | 2.43             | 0.07           | 0.85              | 0.14            | 12.41           | 12.70            | 0.57           | 12.72           |
| 38               | 4.05                  | 0.79             | 0.06          | 0.03            | 2.64             | 0.08           | 1.56              | 0.12            | 14.18           | 14.45            | 1.50           | 14.53           |
| 41               | 9.15                  | 0.65             | 0.04          | 0.02            | 3.29             | 0.10           | 2.02              | 0.14            | 15.74           | 16.10            | 1.98           | 16.22           |
| 44               | 9.80                  | 0.62             | 0.05          | 0.01            | 4.85             | 0.13           | 2.02              | 0.14            | 17.25           | 17.93            | 1.98           | 18.04           |
| 47               | 5.87                  | 0.63             | 0.06          | 0.01            | 7.99             | 0.15           | 1.90              | 0.14            | 19.16           | 20.77            | 1.84           | 20.85           |
| 50               | 4.28                  | 0.61             | 0.06          | 0.02            | 12.65            | 0.17           | 1.77              | 0.14            | 22.76           | 26.05            | 1.69           | 26.10           |
| 53               | 3.74                  | 0.54             | 0.07          | 0.03            | 18.10            | 0.20           | 1.67              | 0.14            | 28.19           | 33.51            | 1.57           | 33.54           |
| 56               | 3.31                  | 0.44             | 0.09          | 0.03            | 23.34            | 0.23           | 1.62              | 0.14            | 33.99           | 41.25            | 1.49           | 41.27           |
| 59               | 2.04                  | 0.34             | 0.10          | 0.03            | 27.57            | 0.27           | 1.59              | 0.16            | 38.71           | 47.53            | 1.45           | 47.55           |
| 62               | -0.26                 | 0.24             | 0.13          | 0.03            | 32.23            | 0.35           | 1.57              | 0.19            | 44.24           | 54.75            | 1.43           | 54.76           |

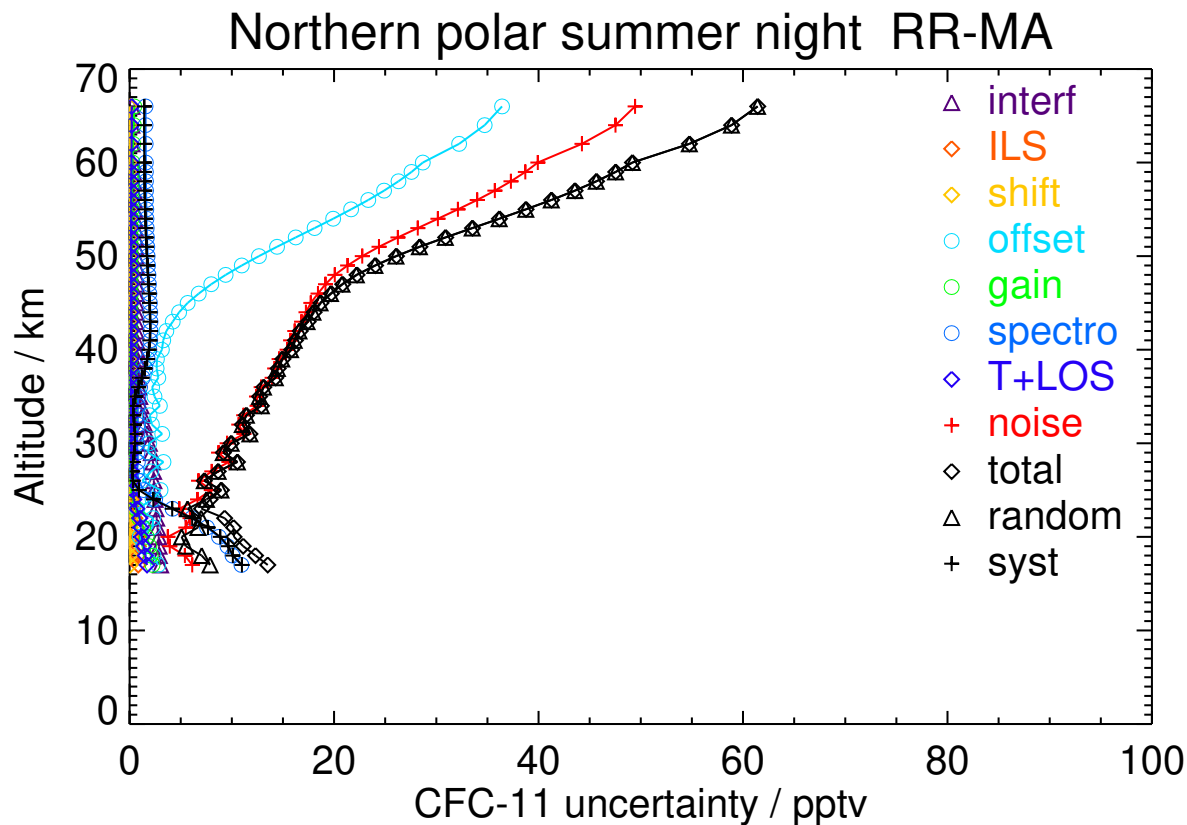

Figure S74. V8R\_F-11\_561 Northern polar summer night

Table S76. CFC-11 error budget for Northern polar autumn day. All uncertainties are 1 $\sigma$ .

| altitude<br>(km) | mean target<br>(pptv) | interf<br>(pptv) | ILS<br>(pptv) | shift<br>(pptv) | offset<br>(pptv) | gain<br>(pptv) | spectro<br>(pptv) | T+LOS<br>(pptv) | noise<br>(pptv) | random<br>(pptv) | syst<br>(pptv) | total<br>(pptv) |
|------------------|-----------------------|------------------|---------------|-----------------|------------------|----------------|-------------------|-----------------|-----------------|------------------|----------------|-----------------|
| 17               | 106.10                | 3.03             | 0.76          | 0.07            | 3.23             | 1.52           | 8.34              | 1.32            | 7.25            | 9.03             | 8.04           | 12.10           |
| 20               | 63.32                 | 2.79             | 0.67          | 0.05            | 1.07             | 1.12           | 6.99              | 0.95            | 4.32            | 5.89             | 6.66           | 8.89            |
| 23               | 11.41                 | 2.50             | 0.22          | 0.02            | 0.96             | 0.40           | 3.46              | 0.62            | 5.83            | 6.58             | 3.21           | 7.32            |
| 26               | 5.49                  | 2.35             | 0.13          | 0.01            | 1.71             | 0.09           | 0.92              | 0.29            | 8.27            | 8.80             | 0.63           | 8.82            |
| 29               | 2.35                  | 2.03             | 0.18          | 0.05            | 2.23             | 0.11           | 1.08              | 0.24            | 10.78           | 11.21            | 0.89           | 11.25           |
| 32               | -0.36                 | 1.41             | 0.15          | 0.05            | 2.45             | 0.07           | 0.53              | 0.15            | 12.93           | 13.24            | 0.19           | 13.25           |
| 35               | 3.12                  | 0.94             | 0.09          | 0.02            | 2.77             | 0.05           | 1.09              | 0.13            | 14.80           | 15.10            | 0.96           | 15.13           |
| 38               | 2.43                  | 0.67             | 0.10          | 0.01            | 3.55             | 0.05           | 1.76              | 0.16            | 16.64           | 17.04            | 1.69           | 17.12           |
| 41               | 0.80                  | 0.54             | 0.14          | <0.01           | 5.39             | 0.06           | 2.22              | 0.18            | 18.34           | 19.13            | 2.18           | 19.25           |
| 44               | 1.16                  | 0.52             | 0.17          | <0.01           | 8.81             | 0.10           | 2.49              | 0.20            | 20.38           | 22.22            | 2.43           | 22.35           |
| 47               | 4.69                  | 0.53             | 0.19          | 0.01            | 13.63            | 0.14           | 2.58              | 0.21            | 23.83           | 27.47            | 2.51           | 27.58           |
| 50               | 6.76                  | 0.52             | 0.19          | 0.02            | 19.24            | 0.17           | 2.57              | 0.21            | 28.99           | 34.81            | 2.47           | 34.90           |
| 53               | 6.86                  | 0.51             | 0.20          | 0.02            | 24.79            | 0.19           | 2.54              | 0.22            | 34.63           | 42.60            | 2.41           | 42.67           |
| 56               | 6.19                  | 0.49             | 0.20          | 0.02            | 29.56            | 0.22           | 2.50              | 0.22            | 39.49           | 49.34            | 2.35           | 49.39           |
| 59               | 11.71                 | 0.48             | 0.19          | 0.02            | 33.23            | 0.17           | 2.58              | 0.22            | 43.16           | 54.48            | 2.50           | 54.54           |
| 62               | 5.11                  | 0.41             | 0.21          | 0.02            | 37.12            | 0.30           | 2.42              | 0.24            | 46.94           | 59.86            | 2.25           | 59.90           |

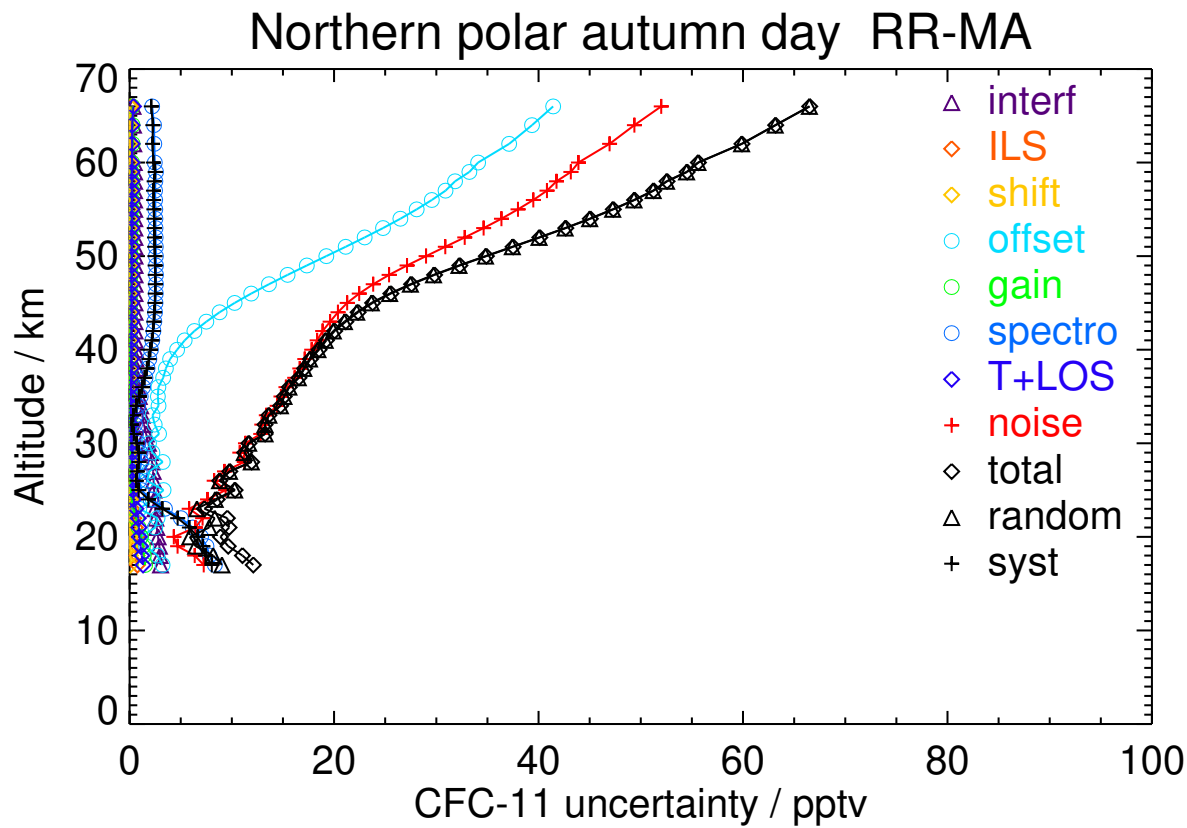

Figure S75. V8R\_F-11\_561 Northern polar autumn day

Table S77. CFC-11 error budget for Northern polar autumn night. All uncertainties are  $1\sigma$ .

| altitude<br>(km) | mean target<br>(pptv) | interf<br>(pptv) | ILS<br>(pptv) | shift<br>(pptv) | offset<br>(pptv) | gain<br>(pptv) | spectro<br>(pptv) | T+LOS<br>(pptv) | noise<br>(pptv) | random<br>(pptv) | syst<br>(pptv) | total<br>(pptv) |
|------------------|-----------------------|------------------|---------------|-----------------|------------------|----------------|-------------------|-----------------|-----------------|------------------|----------------|-----------------|
| 17               | 106.04                | 3.09             | 0.81          | 0.09            | 3.29             | 1.64           | 9.12              | 1.44            | 7.36            | 9.15             | 8.90           | 12.77           |
| 20               | 56.36                 | 2.77             | 0.64          | 0.05            | 0.97             | 1.08           | 6.62              | 0.95            | 4.32            | 5.56             | 6.53           | 8.57            |
| 23               | 4.00                  | 2.51             | 0.17          | 0.02            | 1.18             | 0.30           | 2.79              | 0.55            | 6.08            | 6.79             | 2.60           | 7.27            |
| 26               | 6.28                  | 2.34             | 0.14          | 0.01            | 2.00             | 0.08           | 0.89              | 0.30            | 8.82            | 9.37             | 0.69           | 9.39            |
| 29               | 6.10                  | 2.03             | 0.20          | 0.05            | 2.47             | 0.13           | 1.24              | 0.27            | 11.30           | 11.77            | 1.06           | 11.81           |
| 32               | 1.35                  | 1.42             | 0.13          | 0.04            | 2.59             | 0.07           | 0.56              | 0.17            | 13.43           | 13.77            | 0.28           | 13.77           |
| 35               | -3.97                 | 0.93             | 0.09          | 0.02            | 2.89             | 0.03           | 1.09              | 0.14            | 15.40           | 15.70            | 0.96           | 15.73           |
| 38               | -2.82                 | 0.65             | 0.13          | 0.01            | 3.86             | 0.04           | 1.83              | 0.17            | 17.31           | 17.75            | 1.79           | 17.84           |
| 41               | 0.00                  | 0.52             | 0.17          | <0.01           | 5.99             | 0.05           | 2.28              | 0.20            | 19.03           | 19.96            | 2.26           | 20.09           |
| 44               | 2.53                  | 0.51             | 0.19          | 0.01            | 9.61             | 0.07           | 2.54              | 0.22            | 21.14           | 23.23            | 2.51           | 23.36           |
| 47               | 3.18                  | 0.54             | 0.19          | 0.01            | 14.51            | 0.08           | 2.67              | 0.23            | 24.60           | 28.57            | 2.63           | 28.69           |
| 50               | 1.40                  | 0.56             | 0.20          | 0.02            | 20.08            | 0.10           | 2.73              | 0.24            | 29.65           | 35.81            | 2.68           | 35.91           |
| 53               | -1.10                 | 0.56             | 0.20          | 0.02            | 25.53            | 0.12           | 2.75              | 0.26            | 35.14           | 43.45            | 2.69           | 43.53           |
| 56               | -3.81                 | 0.55             | 0.21          | 0.02            | 30.23            | 0.15           | 2.77              | 0.31            | 39.92           | 50.08            | 2.70           | 50.15           |
| 59               | 22.47                 | 0.50             | 0.28          | 0.01            | 34.30            | 0.21           | 2.59              | 0.29            | 43.80           | 55.64            | 2.49           | 55.69           |
| 62               | -8.04                 | 0.48             | 0.21          | 0.02            | 37.64            | 0.24           | 2.83              | 0.48            | 47.24           | 60.42            | 2.72           | 60.48           |

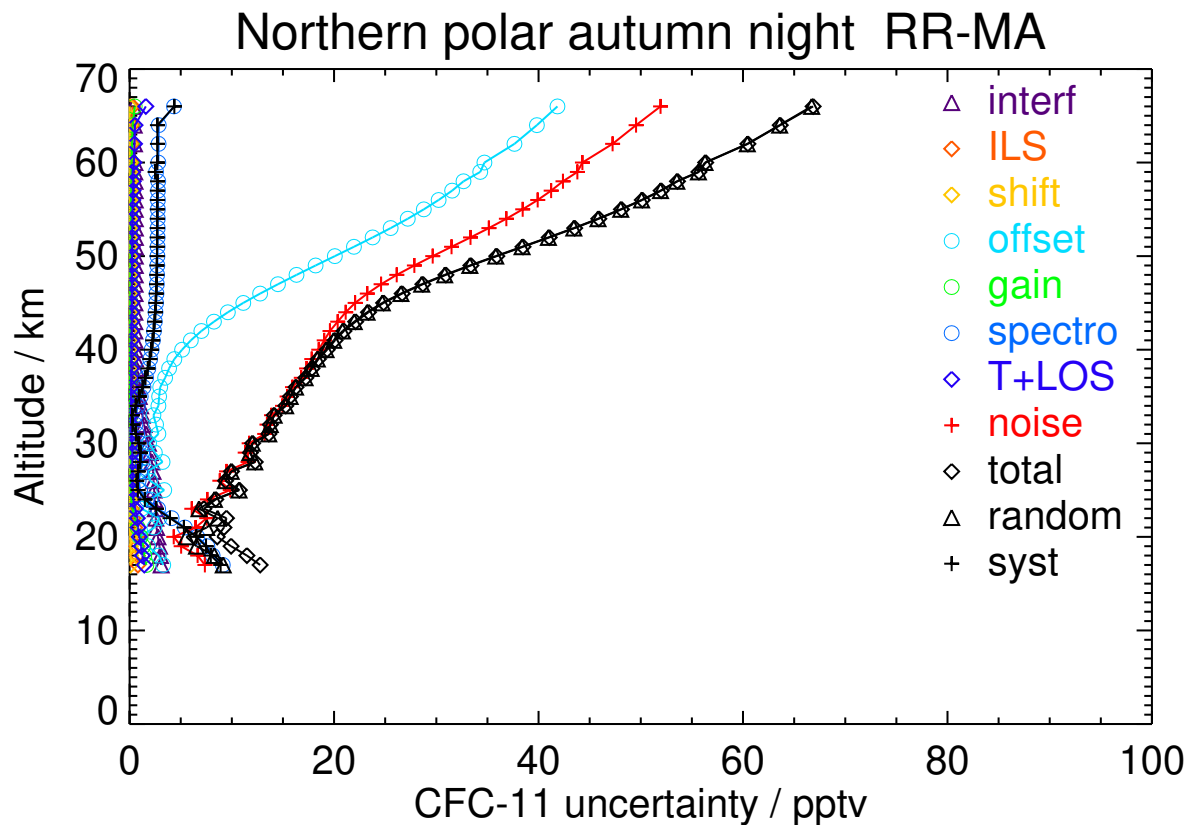

Figure S76. V8R\_F-11\_561 Northern polar autumn night

**Table S78.** CFC-11 error budget for Northern midlatitude winter day. All uncertainties are  $1\sigma$ .

| altitude<br>(km) | mean target<br>(pptv) | interf<br>(pptv) | ILS<br>(pptv) | shift<br>(pptv) | offset<br>(pptv) | gain<br>(pptv) | spectro<br>(pptv) | T+LOS<br>(pptv) | noise<br>(pptv) | random<br>(pptv) | syst<br>(pptv) | total<br>(pptv) |
|------------------|-----------------------|------------------|---------------|-----------------|------------------|----------------|-------------------|-----------------|-----------------|------------------|----------------|-----------------|
| 14               | 165.75                | 4.28             | 0.38          | 0.10            | 2.53             | 2.43           | 11.58             | 1.80            | 5.18            | 7.42             | 11.83          | 13.97           |
| 17               | 158.94                | 3.33             | 0.70          | 0.05            | 0.92             | 2.62           | 12.41             | 1.62            | 3.33            | 5.84             | 12.37          | 13.68           |
| 20               | 79.78                 | 2.77             | 0.55          | 0.10            | 1.15             | 1.85           | 10.00             | 1.40            | 4.31            | 6.04             | 9.84           | 11.55           |
| 23               | 24.40                 | 2.53             | 0.37          | 0.07            | 1.73             | 0.61           | 4.00              | 0.66            | 6.15            | 7.19             | 3.54           | 8.02            |
| 26               | 11.54                 | 2.42             | 0.22          | 0.02            | 2.26             | 0.14           | 1.41              | 0.31            | 8.13            | 8.84             | 1.07           | 8.90            |
| 29               | 7.75                  | 2.09             | 0.23          | 0.05            | 2.62             | 0.11           | 1.30              | 0.23            | 10.09           | 10.68            | 0.78           | 10.71           |
| 32               | 7.41                  | 1.45             | 0.20          | 0.06            | 2.75             | 0.10           | 0.84              | 0.16            | 11.92           | 12.35            | 0.37           | 12.35           |
| 35               | 3.94                  | 0.98             | 0.08          | 0.03            | 2.81             | 0.07           | 1.07              | 0.13            | 13.76           | 14.10            | 0.84           | 14.12           |
| 38               | 3.49                  | 0.72             | 0.05          | 0.02            | 3.27             | 0.05           | 1.81              | 0.14            | 15.63           | 15.99            | 1.72           | 16.08           |
| 41               | 5.35                  | 0.62             | 0.07          | 0.01            | 4.80             | 0.06           | 2.17              | 0.14            | 17.34           | 18.01            | 2.12           | 18.13           |
| 44               | 2.76                  | 0.62             | 0.10          | 0.01            | 8.00             | 0.08           | 2.31              | 0.15            | 19.30           | 20.90            | 2.24           | 21.02           |
| 47               | 1.46                  | 0.63             | 0.13          | 0.01            | 12.81            | 0.09           | 2.32              | 0.15            | 22.65           | 26.03            | 2.24           | 26.13           |
| 50               | 2.44                  | 0.62             | 0.15          | 0.02            | 18.62            | 0.11           | 2.26              | 0.15            | 27.81           | 33.48            | 2.17           | 33.55           |
| 53               | 3.57                  | 0.57             | 0.17          | 0.02            | 24.44            | 0.14           | 2.18              | 0.17            | 33.60           | 41.55            | 2.08           | 41.61           |
| 56               | 3.13                  | 0.52             | 0.18          | 0.02            | 29.43            | 0.16           | 2.12              | 0.21            | 38.62           | 48.57            | 2.01           | 48.61           |
| 59               | -37.91                | 0.34             | 0.16          | 0.03            | 31.40            | 0.12           | 1.83              | 0.20            | 40.75           | 51.45            | 1.83           | 51.48           |
| 62               | 0.16                  | 0.39             | 0.19          | 0.02            | 37.24            | 0.27           | 2.04              | 0.33            | 46.14           | 59.30            | 1.90           | 59.33           |

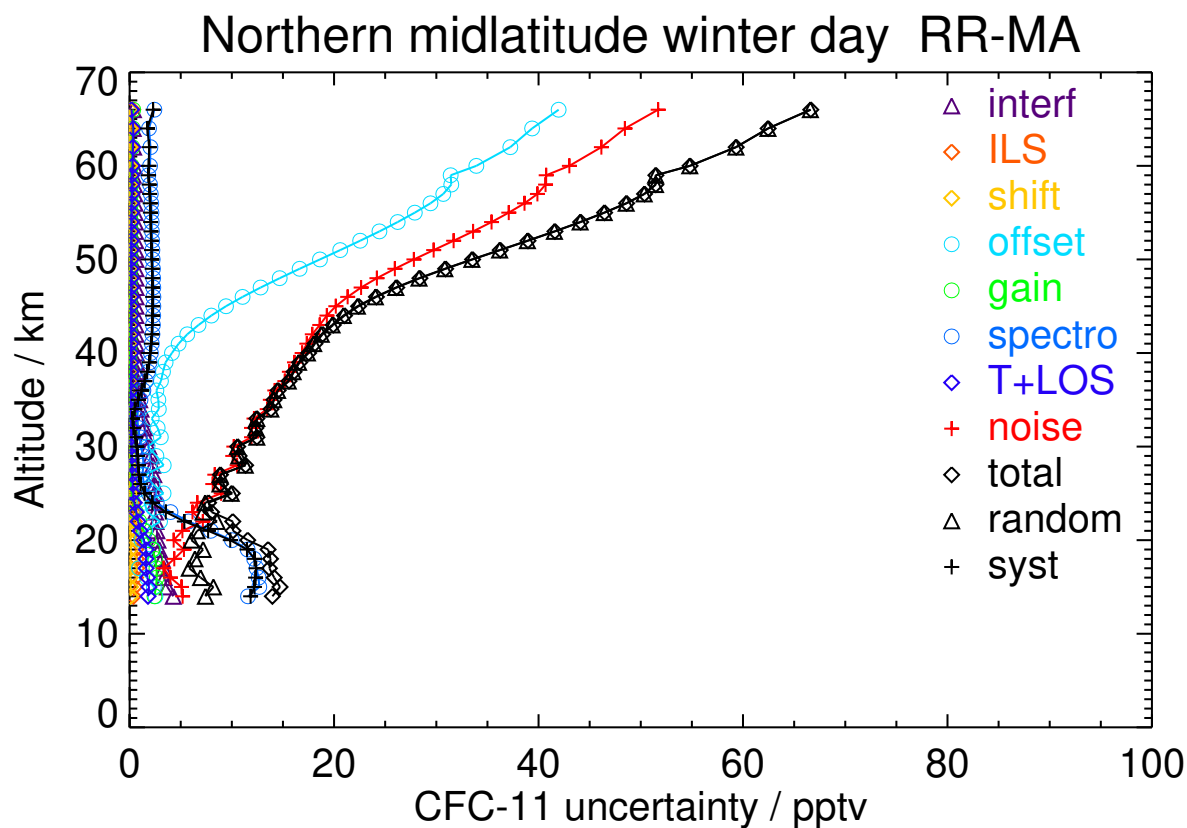**Figure S77.** V8R\_F-11\_561 Northern midlatitude winter day

**Table S79.** CFC-11 error budget for Northern midlatitude winter night. All uncertainties are  $1\sigma$ .

| altitude<br>(km) | mean target<br>(pptv) | interf<br>(pptv) | ILS<br>(pptv) | shift<br>(pptv) | offset<br>(pptv) | gain<br>(pptv) | spectro<br>(pptv) | T+LOS<br>(pptv) | noise<br>(pptv) | random<br>(pptv) | syst<br>(pptv) | total<br>(pptv) |
|------------------|-----------------------|------------------|---------------|-----------------|------------------|----------------|-------------------|-----------------|-----------------|------------------|----------------|-----------------|
| 17               | 121.90                | 3.19             | 0.89          | 0.06            | 1.89             | 1.93           | 9.59              | 1.36            | 4.57            | 7.31             | 8.92           | 11.54           |
| 20               | 66.79                 | 2.76             | 0.80          | 0.09            | 2.04             | 1.38           | 7.87              | 1.11            | 5.17            | 7.01             | 7.42           | 10.21           |
| 23               | 22.11                 | 2.53             | 0.35          | 0.05            | 2.50             | 0.51           | 3.28              | 0.56            | 6.92            | 7.94             | 2.99           | 8.48            |
| 26               | 10.78                 | 2.40             | 0.26          | 0.03            | 2.87             | 0.14           | 1.35              | 0.29            | 8.80            | 9.63             | 0.92           | 9.67            |
| 29               | 7.23                  | 2.10             | 0.27          | 0.06            | 2.95             | 0.15           | 1.28              | 0.23            | 10.52           | 11.15            | 1.05           | 11.20           |
| 32               | 3.32                  | 1.44             | 0.24          | 0.06            | 2.81             | 0.12           | 0.74              | 0.17            | 12.26           | 12.68            | 0.38           | 12.68           |
| 35               | 3.91                  | 0.98             | 0.09          | 0.03            | 2.83             | 0.08           | 1.17              | 0.13            | 13.95           | 14.28            | 1.00           | 14.31           |
| 38               | 2.10                  | 0.74             | 0.07          | 0.02            | 3.29             | 0.08           | 1.97              | 0.15            | 15.62           | 15.99            | 1.89           | 16.10           |
| 41               | 4.26                  | 0.63             | 0.10          | 0.01            | 4.68             | 0.10           | 2.44              | 0.16            | 17.15           | 17.80            | 2.37           | 17.96           |
| 44               | 8.55                  | 0.62             | 0.15          | 0.01            | 7.59             | 0.12           | 2.61              | 0.17            | 18.95           | 20.43            | 2.52           | 20.59           |
| 47               | 10.64                 | 0.59             | 0.19          | 0.02            | 12.20            | 0.14           | 2.56              | 0.17            | 22.12           | 25.28            | 2.45           | 25.40           |
| 50               | 9.80                  | 0.55             | 0.20          | 0.02            | 17.95            | 0.17           | 2.46              | 0.17            | 27.28           | 32.67            | 2.30           | 32.75           |
| 53               | 8.72                  | 0.49             | 0.21          | 0.02            | 23.79            | 0.20           | 2.37              | 0.17            | 33.16           | 40.83            | 2.18           | 40.89           |
| 56               | 8.00                  | 0.42             | 0.22          | 0.02            | 28.83            | 0.24           | 2.32              | 0.18            | 38.28           | 47.94            | 2.10           | 47.98           |
| 59               | -4.17                 | 0.41             | 0.16          | 0.03            | 32.77            | 0.16           | 2.16              | 0.20            | 41.94           | 53.24            | 2.01           | 53.27           |
| 62               | 11.31                 | 0.30             | 0.24          | 0.02            | 36.78            | 0.37           | 2.23              | 0.19            | 46.15           | 59.02            | 2.00           | 59.06           |

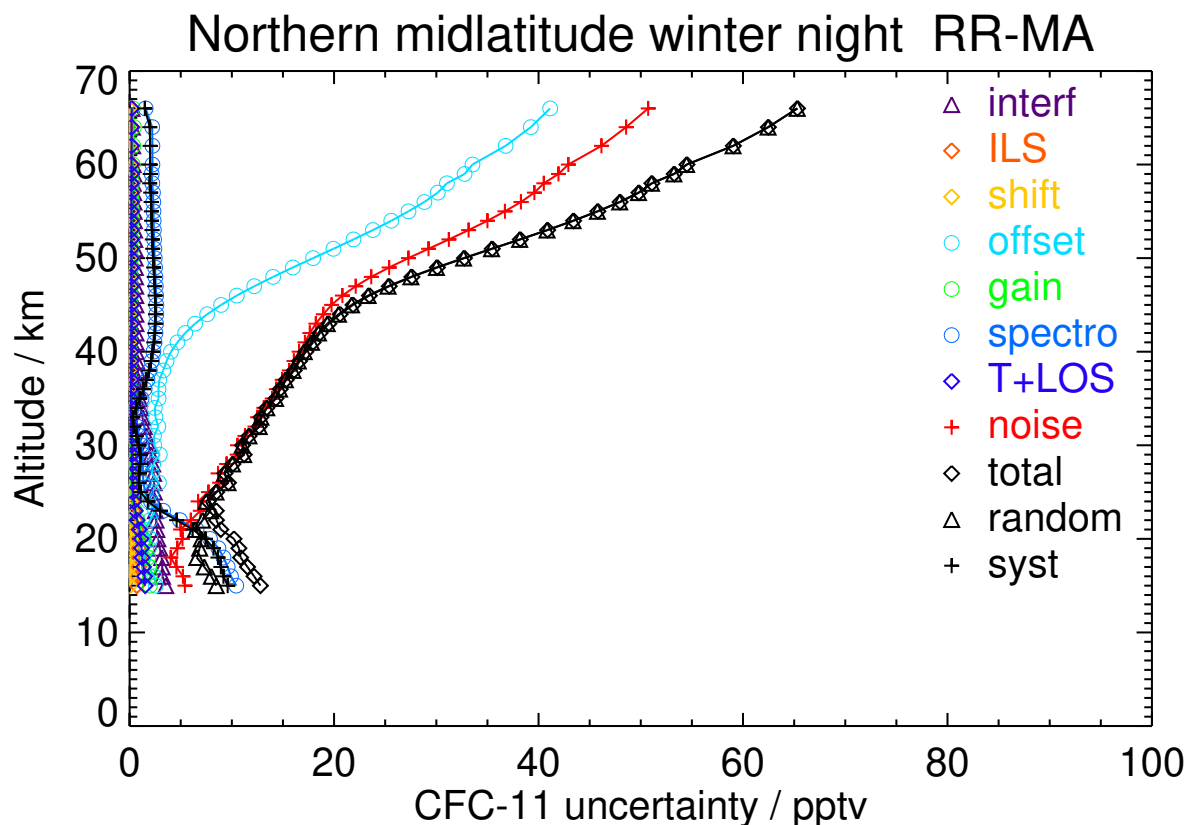**Figure S78.** V8R\_F-11\_561 Northern midlatitude winter night

**Table S80.** CFC-11 error budget for Northern midlatitude spring day. All uncertainties are  $1\sigma$ .

| altitude<br>(km) | mean target<br>(pptv) | interf<br>(pptv) | ILS<br>(pptv) | shift<br>(pptv) | offset<br>(pptv) | gain<br>(pptv) | spectro<br>(pptv) | T+LOS<br>(pptv) | noise<br>(pptv) | random<br>(pptv) | syst<br>(pptv) | total<br>(pptv) |
|------------------|-----------------------|------------------|---------------|-----------------|------------------|----------------|-------------------|-----------------|-----------------|------------------|----------------|-----------------|
| 17               | 146.55                | 3.09             | 1.15          | 0.08            | 3.14             | 1.92           | 10.44             | 1.80            | 7.04            | 8.93             | 10.31          | 13.64           |
| 20               | 96.75                 | 2.84             | 1.20          | 0.05            | 1.23             | 1.54           | 9.38              | 1.39            | 4.40            | 5.98             | 9.33           | 11.08           |
| 23               | 26.80                 | 2.58             | 0.74          | 0.03            | 0.74             | 0.63           | 5.26              | 0.88            | 5.47            | 6.40             | 5.05           | 8.15            |
| 26               | 8.83                  | 2.40             | 0.27          | 0.02            | 1.12             | 0.14           | 1.18              | 0.32            | 7.40            | 7.91             | 0.87           | 7.96            |
| 29               | 5.51                  | 2.12             | 0.28          | 0.05            | 1.55             | 0.08           | 0.67              | 0.18            | 9.32            | 9.70             | 0.48           | 9.71            |
| 32               | 5.42                  | 1.50             | 0.31          | 0.07            | 1.96             | 0.07           | 0.62              | 0.14            | 11.07           | 11.36            | 0.37           | 11.36           |
| 35               | 3.32                  | 1.01             | 0.15          | 0.05            | 2.31             | 0.07           | 1.14              | 0.13            | 12.78           | 13.04            | 1.00           | 13.08           |
| 38               | 4.26                  | 0.80             | 0.08          | 0.02            | 2.74             | 0.07           | 1.82              | 0.14            | 14.48           | 14.77            | 1.76           | 14.88           |
| 41               | 6.34                  | 0.67             | 0.07          | 0.02            | 3.65             | 0.11           | 2.04              | 0.15            | 16.04           | 16.47            | 1.99           | 16.59           |
| 44               | 6.80                  | 0.62             | 0.07          | 0.01            | 5.56             | 0.15           | 1.98              | 0.13            | 17.60           | 18.48            | 1.91           | 18.58           |
| 47               | 6.43                  | 0.57             | 0.08          | 0.01            | 9.15             | 0.17           | 1.86              | 0.13            | 19.94           | 21.96            | 1.77           | 22.03           |
| 50               | 8.06                  | 0.51             | 0.10          | 0.02            | 14.23            | 0.19           | 1.74              | 0.13            | 24.23           | 28.12            | 1.62           | 28.16           |
| 53               | 8.49                  | 0.43             | 0.12          | 0.02            | 19.92            | 0.22           | 1.64              | 0.13            | 30.03           | 36.05            | 1.50           | 36.08           |
| 56               | 6.97                  | 0.35             | 0.14          | 0.02            | 25.16            | 0.25           | 1.59              | 0.13            | 35.71           | 43.69            | 1.42           | 43.71           |
| 59               | 6.05                  | 0.29             | 0.16          | 0.02            | 29.26            | 0.29           | 1.55              | 0.13            | 40.10           | 49.65            | 1.39           | 49.67           |
| 62               | 6.62                  | 0.24             | 0.18          | 0.02            | 33.72            | 0.38           | 1.53              | 0.13            | 45.10           | 56.31            | 1.38           | 56.33           |

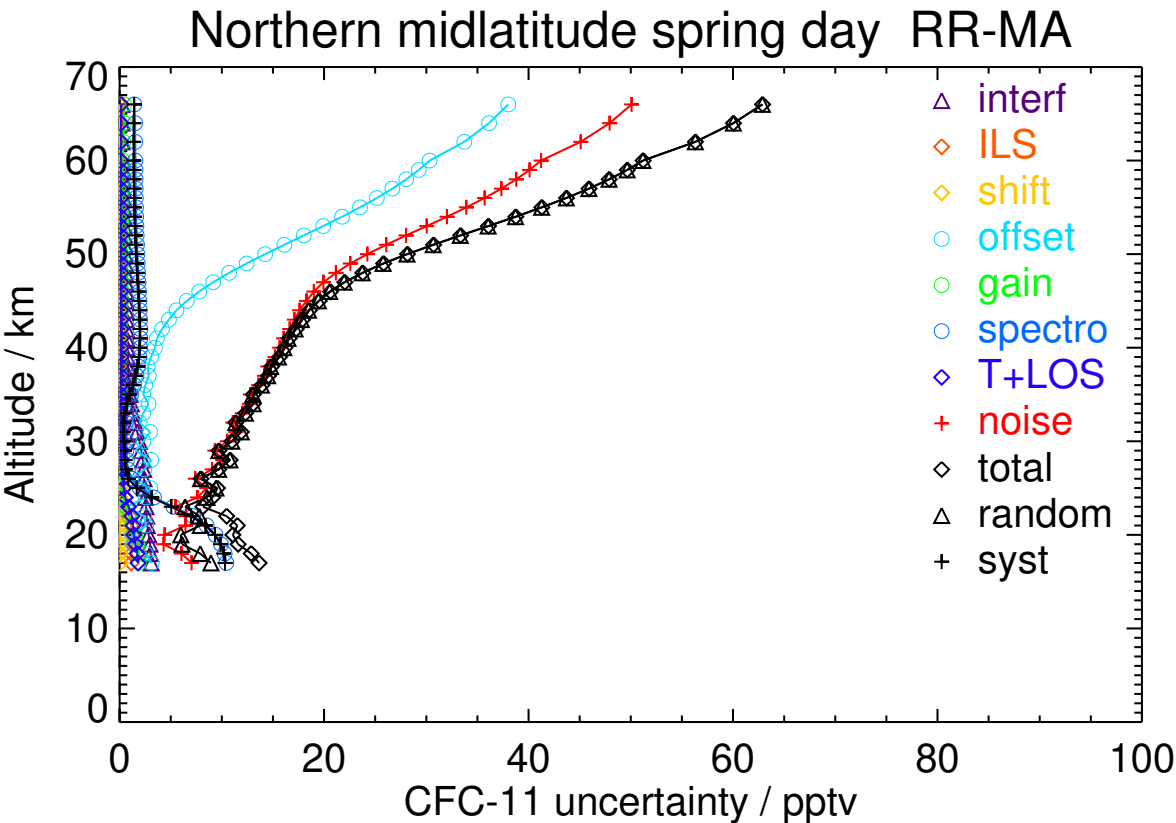

**Figure S79.** V8R\_F-11\_561 Northern midlatitude spring day

**Table S81.** CFC-11 error budget for Northern midlatitude spring night. All uncertainties are  $1\sigma$ .

| altitude<br>(km) | mean target<br>(pptv) | interf<br>(pptv) | ILS<br>(pptv) | shift<br>(pptv) | offset<br>(pptv) | gain<br>(pptv) | spectro<br>(pptv) | T+LOS<br>(pptv) | noise<br>(pptv) | random<br>(pptv) | syst<br>(pptv) | total<br>(pptv) |
|------------------|-----------------------|------------------|---------------|-----------------|------------------|----------------|-------------------|-----------------|-----------------|------------------|----------------|-----------------|
| 17               | 142.07                | 3.04             | 1.06          | 0.07            | 3.05             | 1.89           | 10.12             | 1.72            | 6.74            | 8.59             | 10.01          | 13.19           |
| 20               | 92.26                 | 2.83             | 1.10          | 0.06            | 1.18             | 1.50           | 9.06              | 1.33            | 4.27            | 5.81             | 9.00           | 10.72           |
| 23               | 24.31                 | 2.56             | 0.61          | 0.02            | 0.86             | 0.64           | 5.05              | 0.83            | 5.44            | 6.41             | 4.77           | 7.99            |
| 26               | 10.05                 | 2.42             | 0.20          | 0.01            | 1.31             | 0.16           | 1.13              | 0.30            | 7.55            | 8.08             | 0.87           | 8.13            |
| 29               | 6.33                  | 2.12             | 0.37          | 0.06            | 1.80             | 0.10           | 0.96              | 0.21            | 9.65            | 10.07            | 0.72           | 10.10           |
| 32               | 4.07                  | 1.49             | 0.30          | 0.08            | 2.14             | 0.08           | 0.74              | 0.15            | 11.50           | 11.81            | 0.35           | 11.81           |
| 35               | 2.18                  | 1.04             | 0.17          | 0.05            | 2.41             | 0.08           | 1.22              | 0.13            | 13.18           | 13.46            | 1.03           | 13.50           |
| 38               | 3.28                  | 0.79             | 0.07          | 0.03            | 2.88             | 0.10           | 1.80              | 0.14            | 14.81           | 15.12            | 1.70           | 15.22           |
| 41               | 1.82                  | 0.66             | 0.06          | 0.02            | 3.80             | 0.10           | 1.99              | 0.15            | 16.34           | 16.79            | 1.92           | 16.90           |
| 44               | 0.21                  | 0.61             | 0.08          | 0.02            | 5.78             | 0.12           | 1.95              | 0.14            | 17.89           | 18.82            | 1.90           | 18.91           |
| 47               | 0.30                  | 0.59             | 0.10          | 0.01            | 9.41             | 0.14           | 1.85              | 0.13            | 20.24           | 22.33            | 1.80           | 22.41           |
| 50               | 0.90                  | 0.55             | 0.11          | 0.01            | 14.48            | 0.17           | 1.74              | 0.13            | 24.51           | 28.48            | 1.68           | 28.53           |
| 53               | 1.50                  | 0.48             | 0.12          | 0.02            | 20.14            | 0.20           | 1.66              | 0.13            | 30.25           | 36.35            | 1.58           | 36.38           |
| 56               | 1.75                  | 0.41             | 0.13          | 0.02            | 25.39            | 0.24           | 1.61              | 0.14            | 35.86           | 43.94            | 1.51           | 43.97           |
| 59               | 2.13                  | 0.35             | 0.15          | 0.02            | 29.54            | 0.28           | 1.59              | 0.14            | 40.22           | 49.91            | 1.48           | 49.93           |
| 62               | 2.52                  | 0.28             | 0.16          | 0.02            | 34.17            | 0.37           | 1.57              | 0.15            | 45.35           | 56.79            | 1.46           | 56.80           |

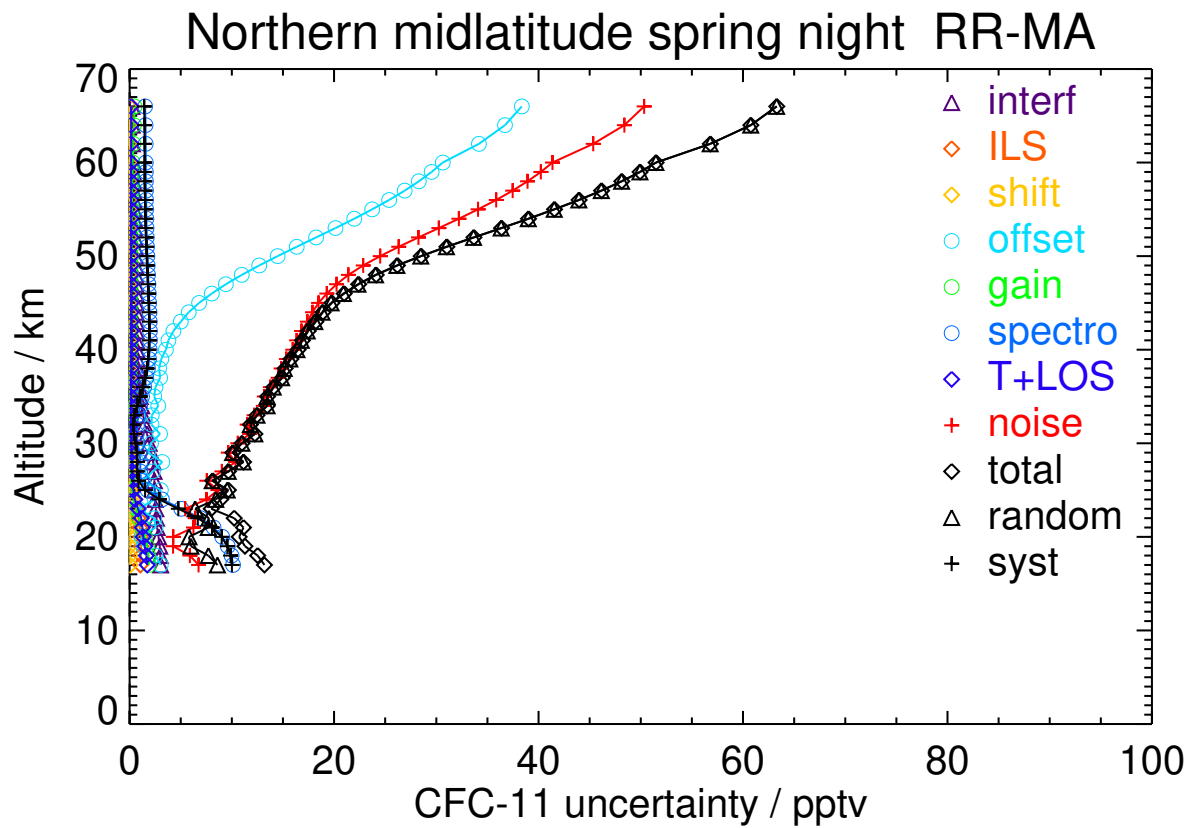

**Figure S80.** V8R\_F-11\_561 Northern midlatitude spring night

**Table S82.** CFC-11 error budget for Northern midlatitude summer day. All uncertainties are  $1\sigma$ .

| altitude<br>(km) | mean target<br>(pptv) | interf<br>(pptv) | ILS<br>(pptv) | shift<br>(pptv) | offset<br>(pptv) | gain<br>(pptv) | spectro<br>(pptv) | T+LOS<br>(pptv) | noise<br>(pptv) | random<br>(pptv) | syst<br>(pptv) | total<br>(pptv) |
|------------------|-----------------------|------------------|---------------|-----------------|------------------|----------------|-------------------|-----------------|-----------------|------------------|----------------|-----------------|
| 17               | 172.13                | 3.05             | 0.98          | 0.08            | 2.85             | 2.44           | 12.01             | 2.07            | 6.38            | 8.11             | 12.16          | 14.62           |
| 20               | 112.88                | 2.88             | 1.07          | 0.04            | 1.09             | 2.06           | 10.79             | 1.56            | 3.92            | 5.40             | 10.95          | 12.21           |
| 23               | 29.14                 | 2.59             | 0.58          | 0.03            | 0.65             | 0.86           | 5.67              | 0.95            | 4.88            | 5.75             | 5.66           | 8.07            |
| 26               | 10.61                 | 2.41             | 0.24          | 0.04            | 0.97             | 0.14           | 1.05              | 0.35            | 6.61            | 7.14             | 0.85           | 7.19            |
| 29               | 3.32                  | 2.16             | 0.33          | 0.05            | 1.41             | 0.06           | 0.75              | 0.21            | 8.35            | 8.76             | 0.48           | 8.78            |
| 32               | 2.88                  | 1.46             | 0.29          | 0.06            | 1.85             | 0.06           | 0.62              | 0.14            | 10.08           | 10.37            | 0.38           | 10.37           |
| 35               | 5.34                  | 1.07             | 0.17          | 0.05            | 2.19             | 0.07           | 1.00              | 0.12            | 11.86           | 12.12            | 0.85           | 12.15           |
| 38               | 5.34                  | 0.82             | 0.11          | 0.03            | 2.47             | 0.06           | 1.50              | 0.13            | 13.54           | 13.80            | 1.44           | 13.87           |
| 41               | 1.07                  | 0.64             | 0.09          | 0.03            | 2.98             | 0.08           | 1.87              | 0.14            | 15.07           | 15.38            | 1.83           | 15.49           |
| 44               | -1.50                 | 0.65             | 0.06          | 0.02            | 4.31             | 0.11           | 1.95              | 0.13            | 16.66           | 17.23            | 1.91           | 17.33           |
| 47               | -0.66                 | 0.64             | 0.05          | 0.01            | 7.08             | 0.13           | 1.81              | 0.12            | 18.47           | 19.79            | 1.77           | 19.87           |
| 50               | -1.63                 | 0.59             | 0.05          | 0.02            | 11.46            | 0.13           | 1.63              | 0.12            | 21.67           | 24.53            | 1.58           | 24.58           |
| 53               | -5.60                 | 0.49             | 0.06          | 0.02            | 16.82            | 0.15           | 1.52              | 0.12            | 26.91           | 31.74            | 1.44           | 31.77           |
| 56               | -8.20                 | 0.38             | 0.07          | 0.03            | 22.13            | 0.18           | 1.45              | 0.12            | 32.84           | 39.60            | 1.36           | 39.63           |
| 59               | -8.64                 | 0.28             | 0.10          | 0.03            | 26.46            | 0.23           | 1.43              | 0.12            | 37.80           | 46.14            | 1.33           | 46.16           |
| 62               | -9.58                 | 0.22             | 0.13          | 0.03            | 31.18            | 0.33           | 1.41              | 0.12            | 43.70           | 53.69            | 1.32           | 53.71           |

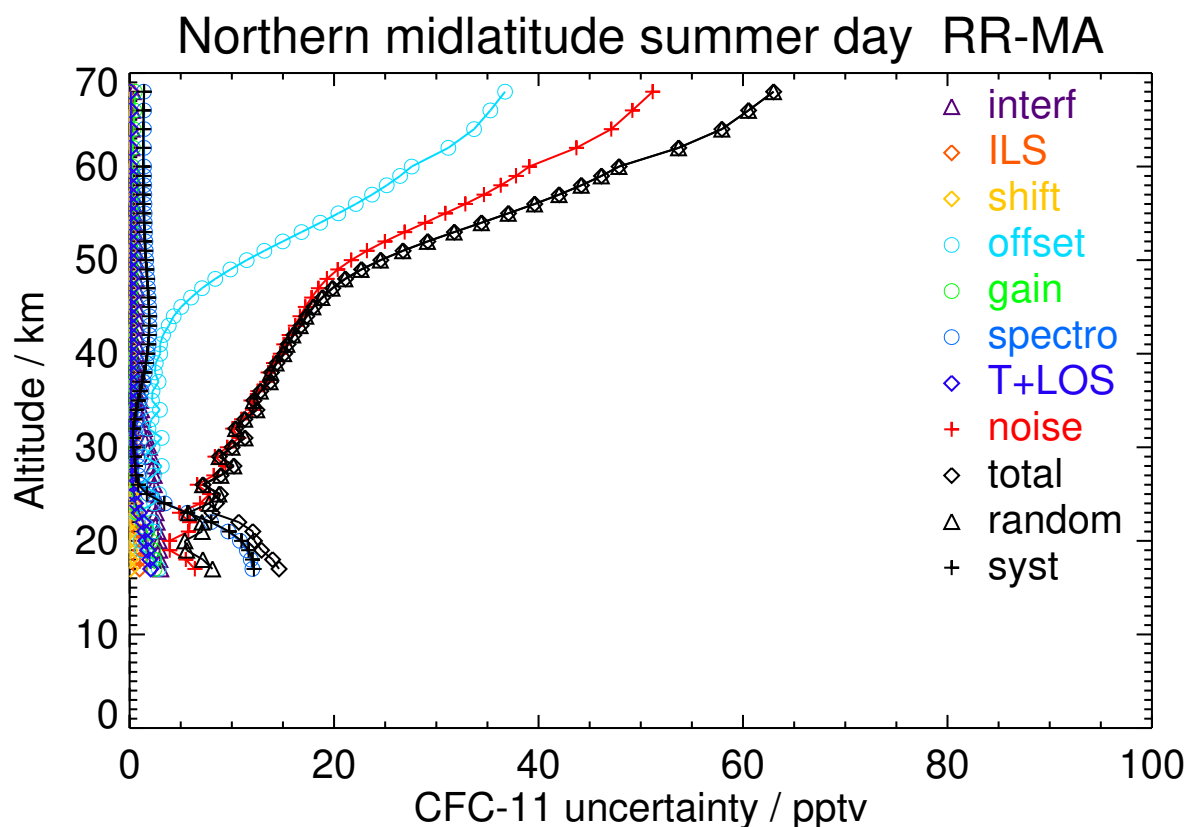**Figure S81.** V8R\_F-11\_561 Northern midlatitude summer day

**Table S83.** CFC-11 error budget for Northern midlatitude summer night. All uncertainties are  $1\sigma$ .

| altitude<br>(km) | mean target<br>(pptv) | interf<br>(pptv) | ILS<br>(pptv) | shift<br>(pptv) | offset<br>(pptv) | gain<br>(pptv) | spectro<br>(pptv) | T+LOS<br>(pptv) | noise<br>(pptv) | random<br>(pptv) | syst<br>(pptv) | total<br>(pptv) |
|------------------|-----------------------|------------------|---------------|-----------------|------------------|----------------|-------------------|-----------------|-----------------|------------------|----------------|-----------------|
| 17               | 168.13                | 2.97             | 1.02          | 0.07            | 2.78             | 2.24           | 11.67             | 2.00            | 6.24            | 8.03             | 11.71          | 14.20           |
| 20               | 110.75                | 2.86             | 1.06          | 0.04            | 0.99             | 1.84           | 10.26             | 1.52            | 3.78            | 5.24             | 10.39          | 11.64           |
| 23               | 30.65                 | 2.58             | 0.57          | 0.03            | 0.70             | 0.75           | 5.54              | 0.94            | 4.82            | 5.70             | 5.51           | 7.92            |
| 26               | 10.74                 | 2.41             | 0.25          | 0.04            | 1.10             | 0.13           | 1.14              | 0.35            | 6.55            | 7.10             | 0.97           | 7.17            |
| 29               | 2.54                  | 2.16             | 0.30          | 0.05            | 1.59             | 0.05           | 0.68              | 0.20            | 8.31            | 8.76             | 0.38           | 8.77            |
| 32               | 4.27                  | 1.46             | 0.30          | 0.07            | 1.95             | 0.06           | 0.64              | 0.14            | 10.03           | 10.34            | 0.35           | 10.35           |
| 35               | 3.21                  | 1.10             | 0.20          | 0.07            | 2.26             | 0.05           | 0.84              | 0.13            | 11.82           | 12.10            | 0.70           | 12.12           |
| 38               | 3.58                  | 0.81             | 0.10          | 0.03            | 2.48             | 0.06           | 1.44              | 0.13            | 13.41           | 13.67            | 1.37           | 13.74           |
| 41               | -2.12                 | 0.65             | 0.08          | 0.03            | 2.91             | 0.10           | 1.82              | 0.14            | 14.93           | 15.23            | 1.78           | 15.33           |
| 44               | -1.54                 | 0.69             | 0.06          | 0.03            | 4.22             | 0.14           | 1.87              | 0.13            | 16.48           | 17.03            | 1.83           | 17.13           |
| 47               | 3.16                  | 0.68             | 0.06          | 0.02            | 6.75             | 0.18           | 1.77              | 0.12            | 18.17           | 19.40            | 1.72           | 19.48           |
| 50               | 6.27                  | 0.62             | 0.08          | 0.02            | 10.93            | 0.21           | 1.63              | 0.12            | 21.24           | 23.91            | 1.55           | 23.96           |
| 53               | 9.06                  | 0.51             | 0.08          | 0.02            | 16.21            | 0.25           | 1.52              | 0.12            | 26.38           | 30.98            | 1.40           | 31.01           |
| 56               | 9.89                  | 0.39             | 0.09          | 0.02            | 21.54            | 0.30           | 1.47              | 0.13            | 32.33           | 38.86            | 1.30           | 38.88           |
| 59               | 8.33                  | 0.29             | 0.10          | 0.03            | 25.94            | 0.35           | 1.46              | 0.14            | 37.39           | 45.52            | 1.27           | 45.54           |
| 62               | 4.82                  | 0.22             | 0.13          | 0.03            | 30.83            | 0.45           | 1.46              | 0.15            | 43.49           | 53.31            | 1.27           | 53.33           |

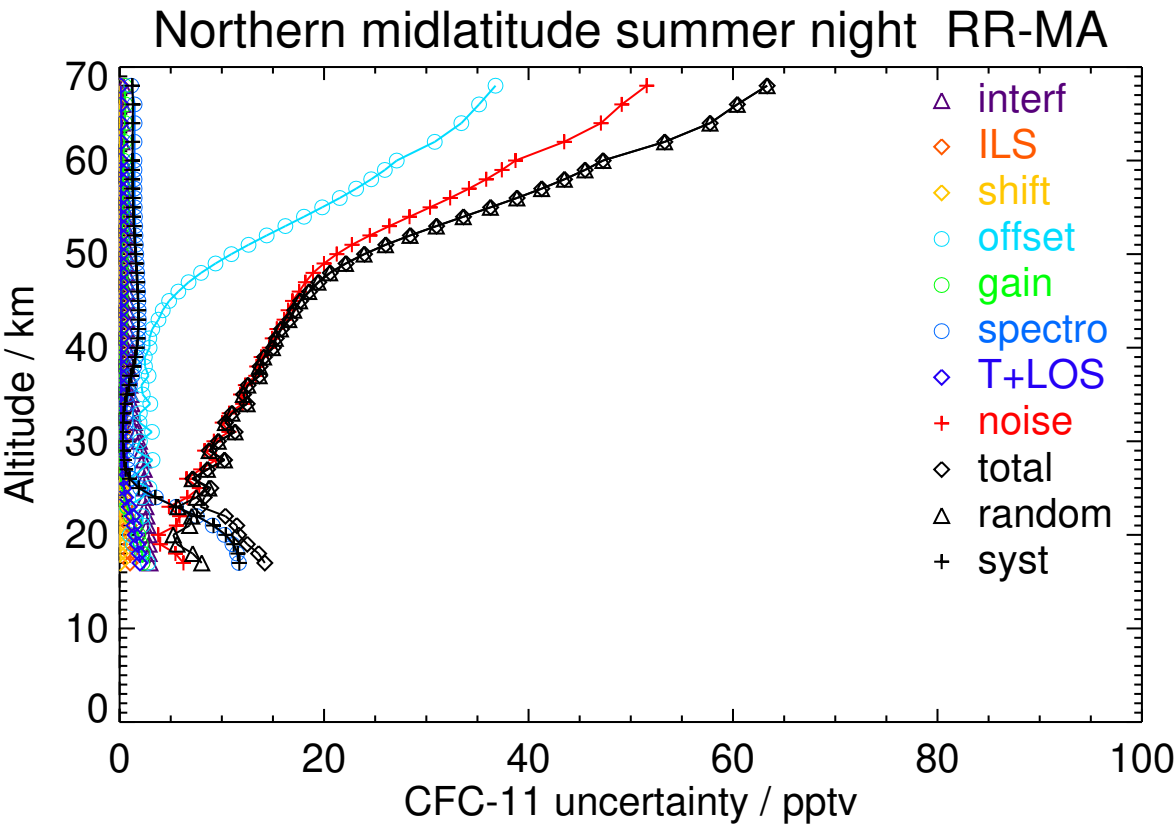

**Figure S82.** V8R\_F-11\_561 Northern midlatitude summer night

**Table S84.** CFC-11 error budget for Northern midlatitude autumn day. All uncertainties are  $1\sigma$ .

| altitude<br>(km) | mean target<br>(pptv) | interf<br>(pptv) | ILS<br>(pptv) | shift<br>(pptv) | offset<br>(pptv) | gain<br>(pptv) | spectro<br>(pptv) | T+LOS<br>(pptv) | noise<br>(pptv) | random<br>(pptv) | syst<br>(pptv) | total<br>(pptv) |
|------------------|-----------------------|------------------|---------------|-----------------|------------------|----------------|-------------------|-----------------|-----------------|------------------|----------------|-----------------|
| 17               | 162.74                | 3.03             | 1.06          | 0.06            | 3.15             | 2.09           | 10.74             | 1.82            | 7.04            | 8.89             | 10.66          | 13.88           |
| 20               | 112.23                | 2.86             | 1.22          | 0.06            | 0.98             | 1.70           | 10.22             | 1.41            | 4.15            | 6.18             | 9.95           | 11.71           |
| 23               | 38.32                 | 2.55             | 0.83          | 0.02            | 0.94             | 0.86           | 6.87              | 1.07            | 5.58            | 6.75             | 6.54           | 9.40            |
| 26               | 8.33                  | 2.39             | 0.32          | 0.01            | 1.52             | 0.22           | 1.89              | 0.40            | 7.71            | 8.34             | 1.39           | 8.45            |
| 29               | 5.65                  | 2.07             | 0.26          | 0.06            | 2.00             | 0.11           | 1.03              | 0.23            | 9.72            | 10.16            | 0.81           | 10.20           |
| 32               | 1.94                  | 1.46             | 0.28          | 0.07            | 2.25             | 0.08           | 0.61              | 0.16            | 11.68           | 12.00            | 0.31           | 12.00           |
| 35               | 2.14                  | 0.97             | 0.12          | 0.04            | 2.50             | 0.07           | 1.00              | 0.12            | 13.44           | 13.72            | 0.85           | 13.74           |
| 38               | 2.59                  | 0.70             | 0.06          | 0.02            | 2.95             | 0.07           | 1.74              | 0.14            | 15.20           | 15.51            | 1.64           | 15.60           |
| 41               | 3.13                  | 0.60             | 0.10          | 0.01            | 4.15             | 0.07           | 2.22              | 0.16            | 16.87           | 17.39            | 2.15           | 17.52           |
| 44               | 3.37                  | 0.57             | 0.14          | <0.01           | 6.74             | 0.09           | 2.35              | 0.16            | 18.61           | 19.81            | 2.28           | 19.94           |
| 47               | 4.99                  | 0.53             | 0.16          | 0.01            | 10.98            | 0.12           | 2.26              | 0.16            | 21.57           | 24.21            | 2.20           | 24.31           |
| 50               | 5.89                  | 0.49             | 0.17          | 0.02            | 16.43            | 0.14           | 2.14              | 0.16            | 26.48           | 31.18            | 2.06           | 31.25           |
| 53               | 6.79                  | 0.43             | 0.18          | 0.02            | 22.12            | 0.17           | 2.05              | 0.16            | 32.37           | 39.21            | 1.94           | 39.26           |
| 56               | 6.91                  | 0.38             | 0.19          | 0.02            | 27.11            | 0.21           | 1.99              | 0.16            | 37.64           | 46.40            | 1.86           | 46.43           |
| 59               | 12.08                 | 0.32             | 0.18          | 0.02            | 30.28            | 0.25           | 1.79              | 0.15            | 41.05           | 51.01            | 1.70           | 51.04           |
| 62               | 6.79                  | 0.28             | 0.20          | 0.02            | 35.04            | 0.32           | 1.91              | 0.17            | 45.88           | 57.74            | 1.78           | 57.76           |

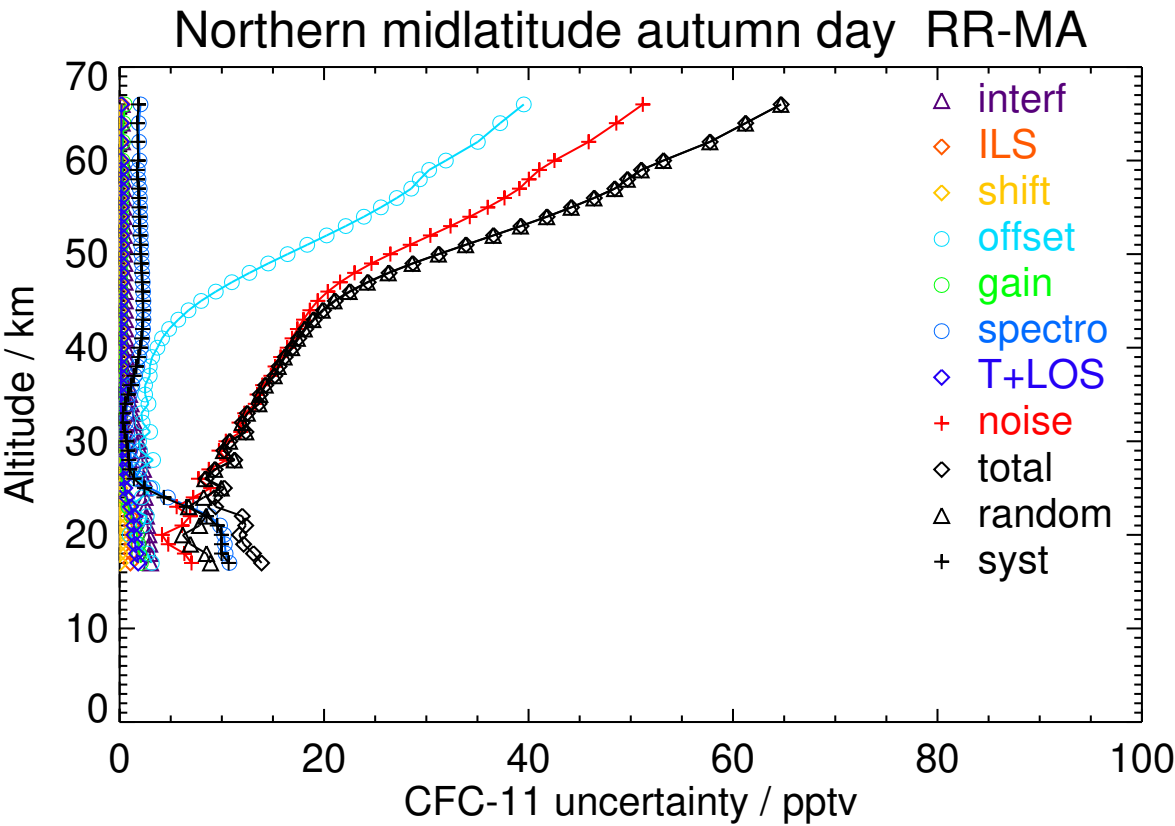

**Figure S83.** V8R\_F-11\_561 Northern midlatitude autumn day

**Table S85.** CFC-11 error budget for Northern midlatitude autumn night. All uncertainties are  $1\sigma$ .

| altitude<br>(km) | mean target<br>(pptv) | interf<br>(pptv) | ILS<br>(pptv) | shift<br>(pptv) | offset<br>(pptv) | gain<br>(pptv) | spectro<br>(pptv) | T+LOS<br>(pptv) | noise<br>(pptv) | random<br>(pptv) | syst<br>(pptv) | total<br>(pptv) |
|------------------|-----------------------|------------------|---------------|-----------------|------------------|----------------|-------------------|-----------------|-----------------|------------------|----------------|-----------------|
| 17               | 146.86                | 2.96             | 1.19          | 0.06            | 3.03             | 2.07           | 10.53             | 1.72            | 6.81            | 9.18             | 9.98           | 13.56           |
| 20               | 102.53                | 2.83             | 1.25          | 0.06            | 0.99             | 1.66           | 9.56              | 1.36            | 4.09            | 6.04             | 9.31           | 11.10           |
| 23               | 32.90                 | 2.58             | 0.69          | 0.03            | 0.95             | 0.77           | 5.77              | 0.92            | 5.41            | 6.45             | 5.52           | 8.49            |
| 26               | 12.39                 | 2.38             | 0.25          | 0.01            | 1.49             | 0.25           | 1.80              | 0.37            | 7.53            | 8.13             | 1.41           | 8.25            |
| 29               | 4.92                  | 2.06             | 0.27          | 0.06            | 2.02             | 0.11           | 0.98              | 0.22            | 9.64            | 10.09            | 0.65           | 10.12           |
| 32               | 6.47                  | 1.44             | 0.24          | 0.06            | 2.33             | 0.10           | 0.65              | 0.14            | 11.63           | 11.96            | 0.32           | 11.97           |
| 35               | 5.33                  | 0.98             | 0.15          | 0.04            | 2.51             | 0.09           | 1.06              | 0.13            | 13.52           | 13.80            | 0.79           | 13.83           |
| 38               | 5.59                  | 0.68             | 0.08          | 0.02            | 2.94             | 0.07           | 1.59              | 0.13            | 15.28           | 15.58            | 1.50           | 15.65           |
| 41               | 4.09                  | 0.58             | 0.09          | 0.01            | 4.17             | 0.07           | 2.06              | 0.15            | 16.88           | 17.41            | 2.00           | 17.52           |
| 44               | 4.07                  | 0.56             | 0.14          | <0.01           | 6.88             | 0.08           | 2.28              | 0.16            | 18.69           | 19.93            | 2.22           | 20.05           |
| 47               | 3.65                  | 0.53             | 0.17          | 0.01            | 11.23            | 0.09           | 2.26              | 0.16            | 21.81           | 24.54            | 2.21           | 24.64           |
| 50               | 1.49                  | 0.48             | 0.18          | 0.01            | 16.74            | 0.11           | 2.16              | 0.16            | 26.90           | 31.69            | 2.10           | 31.76           |
| 53               | -1.00                 | 0.43             | 0.19          | 0.02            | 22.41            | 0.14           | 2.06              | 0.16            | 32.81           | 39.74            | 1.99           | 39.79           |
| 56               | -3.08                 | 0.37             | 0.20          | 0.02            | 27.34            | 0.17           | 1.99              | 0.17            | 38.01           | 46.83            | 1.91           | 46.87           |
| 59               | -19.12                | 0.33             | 0.25          | 0.02            | 30.31            | 0.22           | 1.96              | 0.21            | 41.25           | 51.19            | 1.86           | 51.22           |
| 62               | -8.47                 | 0.27             | 0.21          | 0.02            | 35.12            | 0.28           | 1.89              | 0.22            | 45.90           | 57.80            | 1.80           | 57.83           |

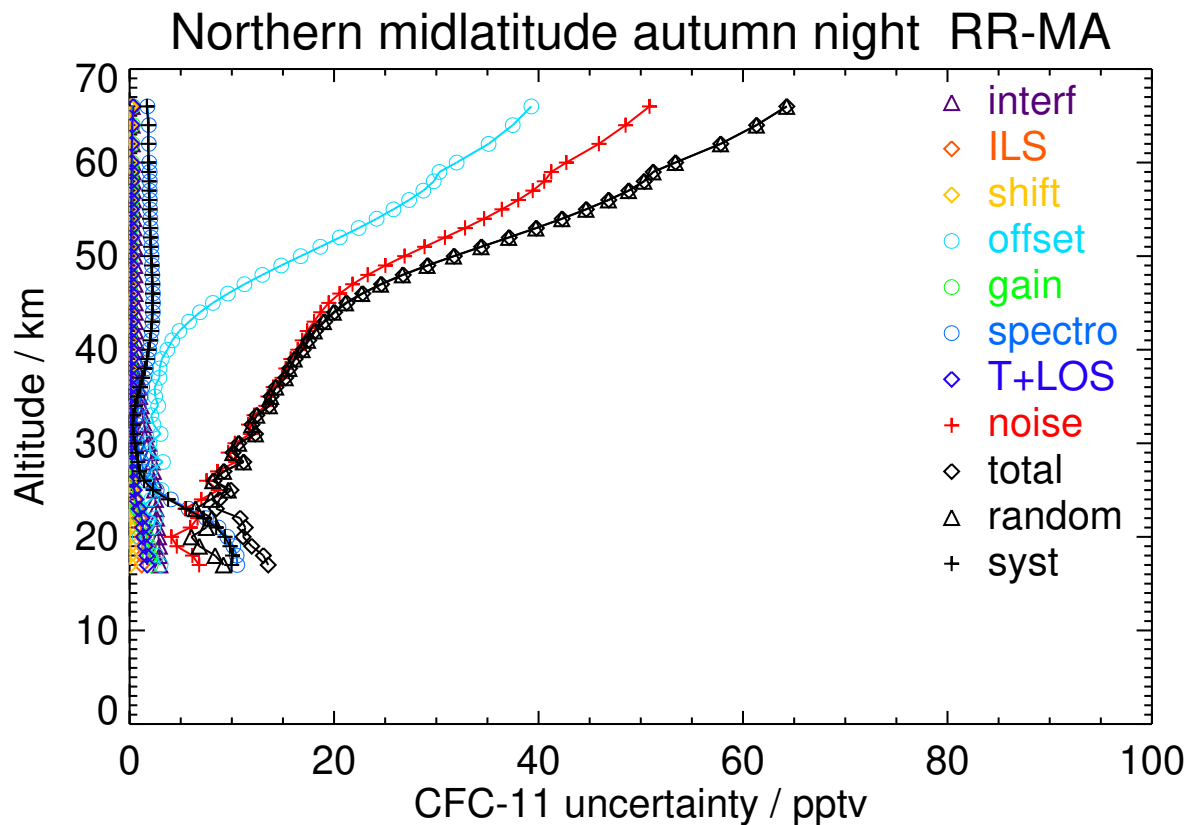

**Figure S84.** V8R\_F-11\_561 Northern midlatitude autumn night

**Table S86.** CFC-11 error budget for Tropics day. All uncertainties are  $1\sigma$ .

| altitude<br>(km) | mean target<br>(pptv) | interf<br>(pptv) | ILS<br>(pptv) | shift<br>(pptv) | offset<br>(pptv) | gain<br>(pptv) | spectro<br>(pptv) | T+LOS<br>(pptv) | noise<br>(pptv) | random<br>(pptv) | syst<br>(pptv) | total<br>(pptv) |
|------------------|-----------------------|------------------|---------------|-----------------|------------------|----------------|-------------------|-----------------|-----------------|------------------|----------------|-----------------|
| 17               | 230.74                | 3.15             | 3.02          | 0.17            | 3.71             | 2.79           | 13.51             | 3.48            | 8.40            | 10.90            | 13.68          | 17.49           |
| 20               | 191.13                | 3.00             | 2.77          | 0.09            | 1.00             | 2.15           | 13.36             | 2.32            | 4.79            | 6.46             | 13.69          | 15.14           |
| 23               | 107.83                | 2.55             | 2.24          | 0.07            | 0.95             | 1.07           | 11.10             | 1.83            | 5.86            | 6.99             | 11.21          | 13.21           |
| 26               | 51.64                 | 2.43             | 1.76          | 0.05            | 1.26             | 0.52           | 5.78              | 0.96            | 7.41            | 8.26             | 5.65           | 10.01           |
| 29               | 18.84                 | 2.18             | 1.21          | 0.15            | 1.56             | 0.19           | 2.45              | 0.46            | 9.02            | 9.49             | 2.47           | 9.81            |
| 32               | 5.77                  | 1.51             | 0.45          | 0.09            | 1.87             | 0.06           | 0.68              | 0.18            | 10.68           | 10.97            | 0.47           | 10.98           |
| 35               | 4.52                  | 1.04             | 0.13          | 0.05            | 2.21             | 0.06           | 1.11              | 0.12            | 12.39           | 12.64            | 0.99           | 12.68           |
| 38               | 0.68                  | 0.82             | 0.09          | 0.03            | 2.62             | 0.07           | 1.51              | 0.13            | 14.06           | 14.33            | 1.44           | 14.41           |
| 41               | 5.57                  | 0.67             | 0.07          | 0.03            | 3.37             | 0.11           | 1.77              | 0.13            | 15.56           | 15.94            | 1.71           | 16.03           |
| 44               | 10.32                 | 0.63             | 0.05          | 0.03            | 5.10             | 0.16           | 1.71              | 0.12            | 17.10           | 17.86            | 1.65           | 17.94           |
| 47               | 10.59                 | 0.58             | 0.07          | 0.02            | 8.43             | 0.19           | 1.53              | 0.11            | 19.25           | 21.03            | 1.44           | 21.08           |
| 50               | 9.06                  | 0.51             | 0.09          | 0.01            | 13.33            | 0.21           | 1.38              | 0.11            | 23.31           | 26.87            | 1.26           | 26.90           |
| 53               | 9.06                  | 0.41             | 0.10          | 0.02            | 18.98            | 0.24           | 1.30              | 0.11            | 29.12           | 34.77            | 1.13           | 34.79           |
| 56               | 9.81                  | 0.33             | 0.11          | 0.02            | 24.28            | 0.28           | 1.26              | 0.11            | 34.95           | 42.56            | 1.06           | 42.57           |
| 59               | 9.79                  | 0.26             | 0.12          | 0.02            | 28.41            | 0.33           | 1.25              | 0.11            | 39.44           | 48.62            | 1.03           | 48.63           |
| 62               | 9.18                  | 0.22             | 0.13          | 0.02            | 32.82            | 0.41           | 1.24              | 0.11            | 44.47           | 55.28            | 1.03           | 55.29           |

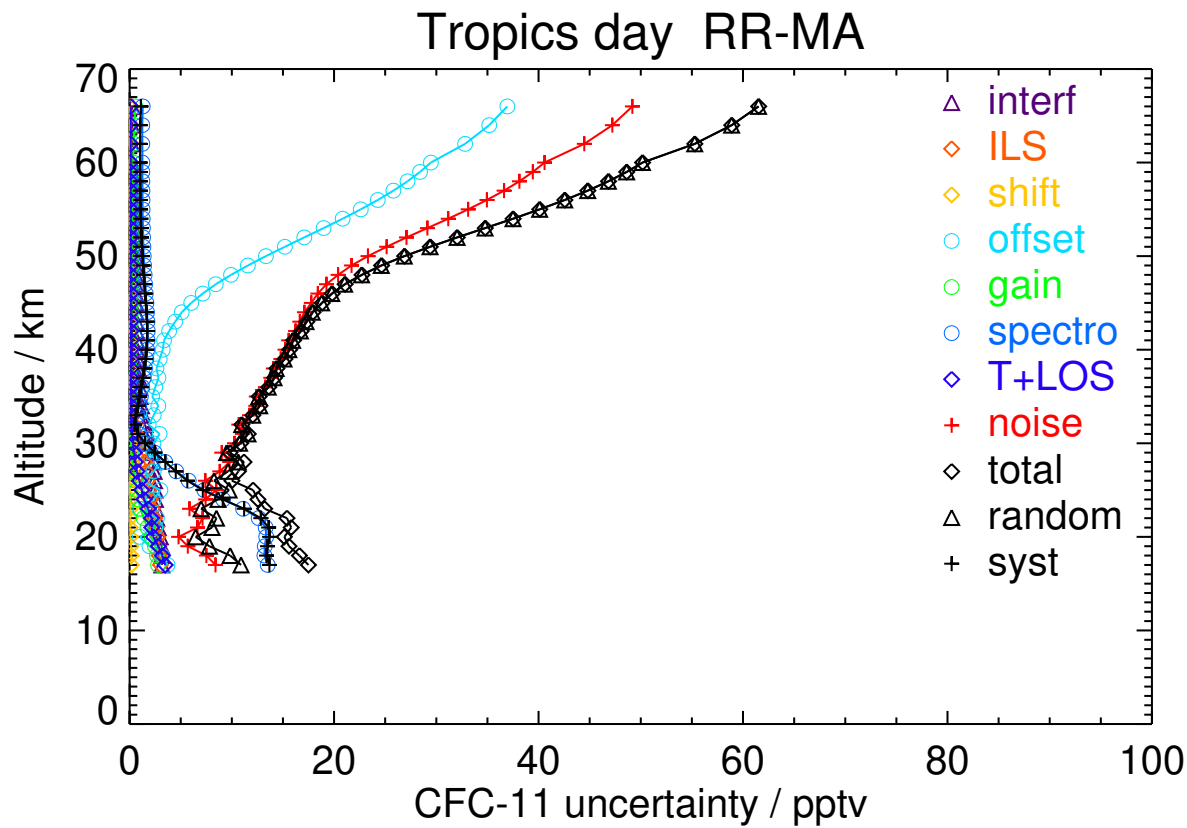

**Figure S85.** V8R\_F-11\_561 Tropics day

**Table S87.** CFC-11 error budget for Tropics night. All uncertainties are  $1\sigma$ .

| altitude<br>(km) | mean target<br>(pptv) | interf<br>(pptv) | ILS<br>(pptv) | shift<br>(pptv) | offset<br>(pptv) | gain<br>(pptv) | spectro<br>(pptv) | T+LOS<br>(pptv) | noise<br>(pptv) | random<br>(pptv) | syst<br>(pptv) | total<br>(pptv) |
|------------------|-----------------------|------------------|---------------|-----------------|------------------|----------------|-------------------|-----------------|-----------------|------------------|----------------|-----------------|
| 17               | 228.02                | 3.12             | 2.81          | 0.17            | 3.69             | 2.70           | 12.77             | 3.29            | 8.33            | 10.58            | 13.03          | 16.79           |
| 20               | 189.28                | 2.98             | 2.74          | 0.10            | 1.01             | 2.12           | 12.98             | 2.28            | 4.76            | 6.33             | 13.35          | 14.77           |
| 23               | 106.63                | 2.56             | 2.25          | 0.07            | 1.06             | 1.06           | 11.00             | 1.84            | 5.90            | 7.01             | 11.13          | 13.16           |
| 26               | 51.02                 | 2.44             | 1.72          | 0.05            | 1.44             | 0.53           | 5.68              | 0.94            | 7.45            | 8.37             | 5.47           | 10.00           |
| 29               | 20.55                 | 2.19             | 1.23          | 0.15            | 1.78             | 0.19           | 2.52              | 0.46            | 9.10            | 9.63             | 2.46           | 9.94            |
| 32               | 3.55                  | 1.50             | 0.46          | 0.09            | 2.07             | 0.06           | 0.66              | 0.19            | 10.73           | 11.06            | 0.47           | 11.07           |
| 35               | 4.20                  | 1.04             | 0.11          | 0.04            | 2.34             | 0.06           | 1.17              | 0.12            | 12.49           | 12.76            | 1.07           | 12.80           |
| 38               | 6.54                  | 0.81             | 0.08          | 0.03            | 2.70             | 0.07           | 1.46              | 0.13            | 14.17           | 14.46            | 1.37           | 14.52           |
| 41               | 4.56                  | 0.65             | 0.08          | 0.03            | 3.35             | 0.10           | 1.54              | 0.12            | 15.68           | 16.06            | 1.47           | 16.13           |
| 44               | -0.76                 | 0.62             | 0.06          | 0.03            | 5.10             | 0.12           | 1.49              | 0.11            | 17.19           | 17.94            | 1.43           | 18.00           |
| 47               | -4.09                 | 0.60             | 0.06          | 0.02            | 8.42             | 0.14           | 1.39              | 0.11            | 19.27           | 21.04            | 1.33           | 21.09           |
| 50               | -2.95                 | 0.52             | 0.06          | <0.01           | 13.27            | 0.15           | 1.29              | 0.10            | 23.28           | 26.81            | 1.21           | 26.83           |
| 53               | -4.19                 | 0.42             | 0.07          | 0.01            | 18.86            | 0.17           | 1.21              | 0.10            | 29.09           | 34.68            | 1.11           | 34.69           |
| 56               | -5.35                 | 0.34             | 0.08          | 0.01            | 24.11            | 0.20           | 1.16              | 0.10            | 34.91           | 42.43            | 1.05           | 42.44           |
| 59               | -5.12                 | 0.27             | 0.09          | 0.01            | 28.22            | 0.24           | 1.13              | 0.10            | 39.42           | 48.48            | 1.02           | 48.49           |
| 62               | -3.91                 | 0.22             | 0.10          | 0.01            | 32.61            | 0.32           | 1.12              | 0.11            | 44.45           | 55.13            | 1.02           | 55.14           |

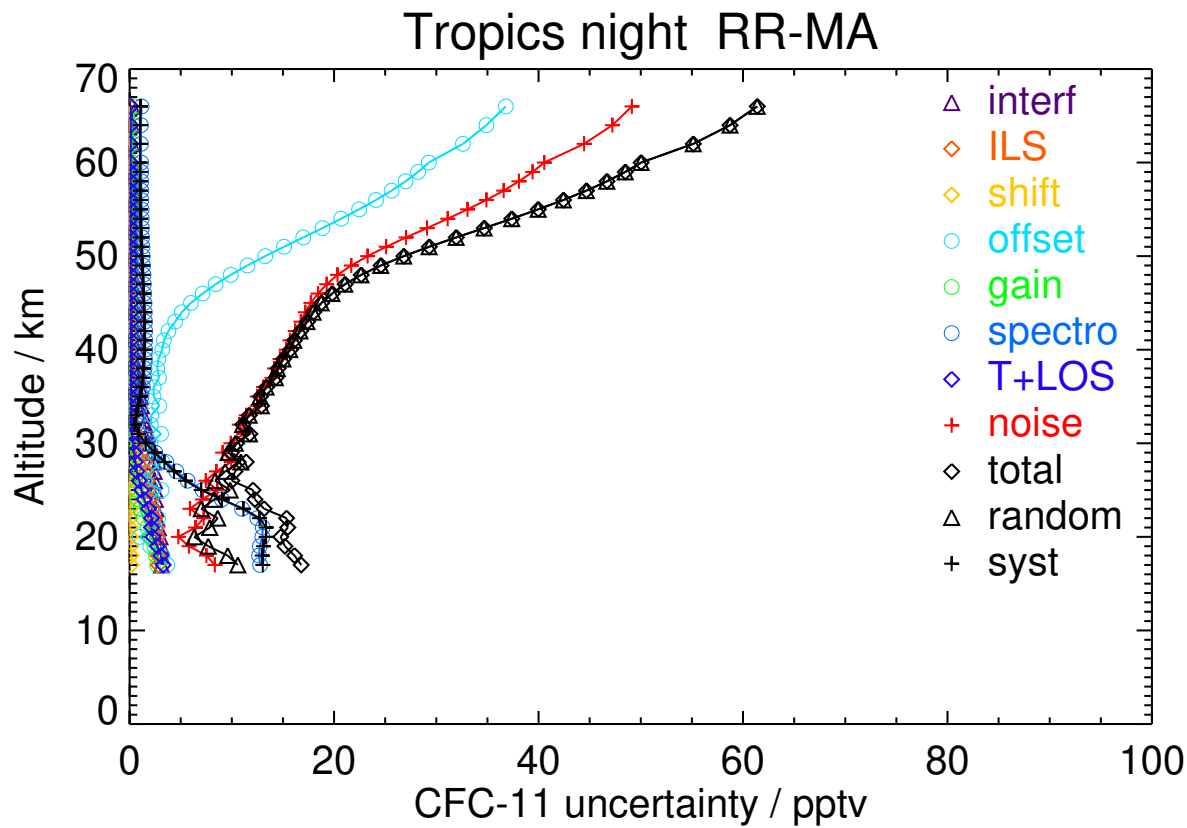

**Figure S86.** V8R\_F-11\_561 Tropics night

**Table S88.** CFC-11 error budget for Southern midlatitude winter day. All uncertainties are  $1\sigma$ .

| altitude<br>(km) | mean target<br>(pptv) | interf<br>(pptv) | ILS<br>(pptv) | shift<br>(pptv) | offset<br>(pptv) | gain<br>(pptv) | spectro<br>(pptv) | T+LOS<br>(pptv) | noise<br>(pptv) | random<br>(pptv) | syst<br>(pptv) | total<br>(pptv) |
|------------------|-----------------------|------------------|---------------|-----------------|------------------|----------------|-------------------|-----------------|-----------------|------------------|----------------|-----------------|
| 17               | 65.48                 | 3.14             | 0.66          | 0.07            | 3.73             | 1.25           | 6.13              | 0.96            | 8.77            | 11.06            | 4.35           | 11.89           |
| 20               | 82.88                 | 2.85             | 0.88          | 0.06            | 0.86             | 1.35           | 7.39              | 1.09            | 4.03            | 5.66             | 7.17           | 9.14            |
| 23               | 27.06                 | 2.56             | 0.50          | 0.02            | 1.77             | 0.66           | 4.58              | 0.78            | 6.16            | 7.19             | 4.26           | 8.36            |
| 26               | 11.70                 | 2.42             | 0.28          | 0.03            | 2.56             | 0.24           | 1.98              | 0.37            | 8.63            | 9.40             | 1.65           | 9.54            |
| 29               | 3.01                  | 2.13             | 0.26          | 0.06            | 2.87             | 0.12           | 0.91              | 0.22            | 10.58           | 11.19            | 0.70           | 11.21           |
| 32               | 7.51                  | 1.47             | 0.22          | 0.06            | 2.80             | 0.10           | 0.77              | 0.14            | 12.32           | 12.74            | 0.35           | 12.74           |
| 35               | 9.28                  | 0.98             | 0.18          | 0.06            | 2.86             | 0.08           | 1.04              | 0.14            | 13.95           | 14.29            | 0.81           | 14.31           |
| 38               | 4.14                  | 0.73             | 0.10          | 0.03            | 3.29             | 0.07           | 1.66              | 0.15            | 15.58           | 15.95            | 1.58           | 16.03           |
| 41               | 1.76                  | 0.62             | 0.12          | 0.02            | 4.59             | 0.08           | 2.22              | 0.17            | 17.08           | 17.71            | 2.18           | 17.84           |
| 44               | 3.99                  | 0.57             | 0.16          | 0.01            | 7.29             | 0.11           | 2.41              | 0.18            | 18.77           | 20.15            | 2.37           | 20.29           |
| 47               | 4.72                  | 0.54             | 0.17          | 0.01            | 11.60            | 0.14           | 2.37              | 0.17            | 21.86           | 24.76            | 2.31           | 24.87           |
| 50               | 4.04                  | 0.48             | 0.18          | 0.02            | 17.05            | 0.17           | 2.26              | 0.17            | 26.95           | 31.90            | 2.17           | 31.97           |
| 53               | 5.23                  | 0.42             | 0.19          | 0.02            | 22.62            | 0.20           | 2.16              | 0.18            | 32.87           | 39.91            | 2.05           | 39.96           |
| 56               | 6.99                  | 0.36             | 0.20          | 0.02            | 27.40            | 0.24           | 2.09              | 0.19            | 38.08           | 46.92            | 1.96           | 46.96           |
| 59               | 26.01                 | 0.34             | 0.22          | 0.02            | 30.93            | 0.34           | 2.10              | 0.23            | 41.94           | 52.13            | 1.91           | 52.16           |
| 62               | 10.28                 | 0.29             | 0.22          | 0.02            | 34.62            | 0.35           | 1.99              | 0.26            | 45.87           | 57.47            | 1.84           | 57.50           |

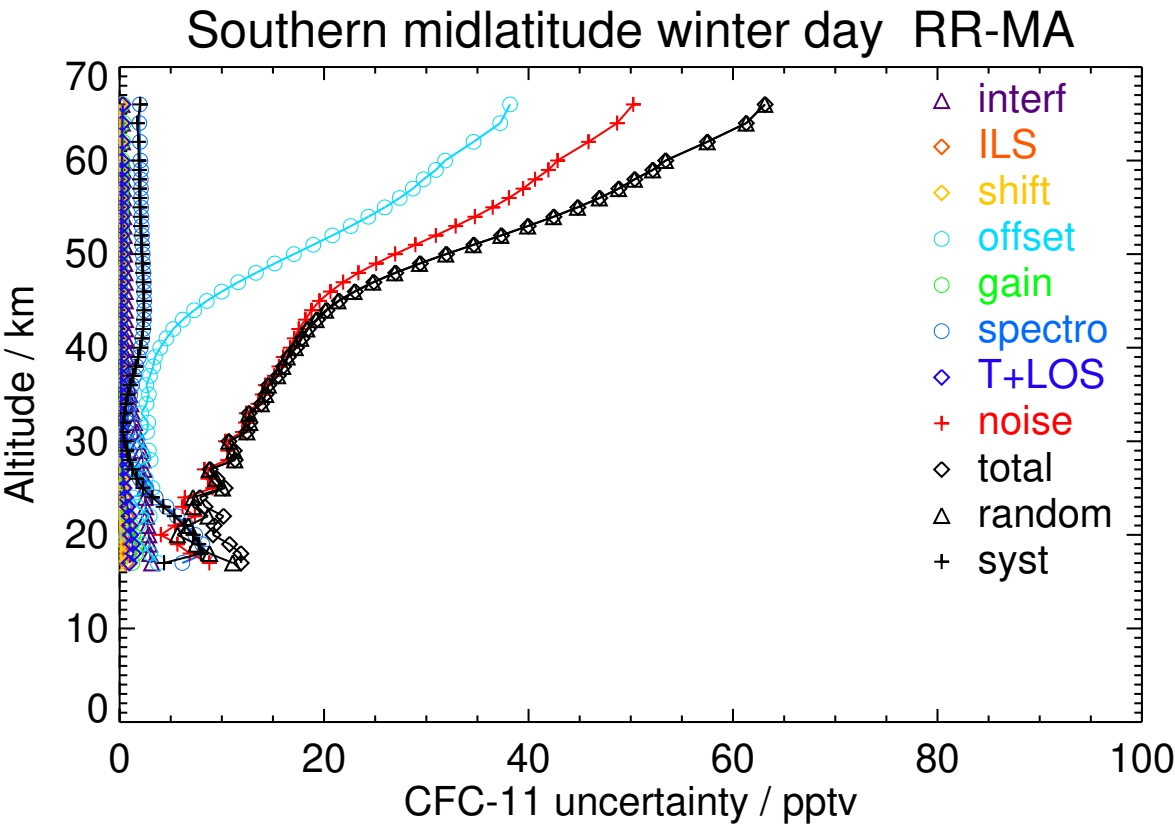

**Figure S87.** V8R\_F-11\_561 Southern midlatitude winter day

**Table S89.** CFC-11 error budget for Southern midlatitude winter night. All uncertainties are  $1\sigma$ .

| altitude<br>(km) | mean target<br>(pptv) | interf<br>(pptv) | ILS<br>(pptv) | shift<br>(pptv) | offset<br>(pptv) | gain<br>(pptv) | spectro<br>(pptv) | T+LOS<br>(pptv) | noise<br>(pptv) | random<br>(pptv) | syst<br>(pptv) | total<br>(pptv) |
|------------------|-----------------------|------------------|---------------|-----------------|------------------|----------------|-------------------|-----------------|-----------------|------------------|----------------|-----------------|
| 17               | 101.23                | 2.96             | 0.73          | 0.08            | 3.46             | 1.27           | 6.83              | 1.19            | 7.71            | 9.38             | 6.53           | 11.42           |
| 20               | 74.07                 | 2.78             | 0.96          | 0.08            | 0.95             | 1.14           | 7.05              | 1.05            | 4.38            | 5.90             | 6.78           | 8.99            |
| 23               | 19.62                 | 2.49             | 0.53          | 0.03            | 1.69             | 0.48           | 4.08              | 0.74            | 6.62            | 7.52             | 3.76           | 8.41            |
| 26               | 9.97                  | 2.37             | 0.26          | 0.03            | 2.41             | 0.16           | 1.53              | 0.33            | 9.14            | 9.80             | 1.20           | 9.87            |
| 29               | 6.36                  | 2.08             | 0.29          | 0.05            | 2.68             | 0.14           | 1.26              | 0.25            | 11.39           | 11.92            | 0.95           | 11.96           |
| 32               | 1.64                  | 1.46             | 0.24          | 0.05            | 2.70             | 0.09           | 0.69              | 0.16            | 13.23           | 13.60            | 0.34           | 13.60           |
| 35               | -0.42                 | 0.99             | 0.13          | 0.04            | 2.99             | 0.07           | 1.01              | 0.14            | 14.94           | 15.28            | 0.80           | 15.30           |
| 38               | 1.28                  | 0.73             | 0.10          | 0.02            | 3.79             | 0.09           | 1.69              | 0.15            | 16.60           | 17.05            | 1.62           | 17.12           |
| 41               | 1.09                  | 0.61             | 0.13          | 0.02            | 5.42             | 0.12           | 2.10              | 0.18            | 18.06           | 18.87            | 2.06           | 18.98           |
| 44               | 0.93                  | 0.57             | 0.16          | 0.02            | 8.43             | 0.14           | 2.28              | 0.19            | 19.74           | 21.48            | 2.21           | 21.59           |
| 47               | 2.34                  | 0.55             | 0.18          | 0.01            | 12.86            | 0.16           | 2.30              | 0.20            | 22.75           | 26.15            | 2.22           | 26.25           |
| 50               | 4.37                  | 0.53             | 0.19          | 0.01            | 18.25            | 0.19           | 2.27              | 0.20            | 27.73           | 33.21            | 2.17           | 33.28           |
| 53               | 5.67                  | 0.49             | 0.19          | 0.02            | 23.71            | 0.22           | 2.22              | 0.22            | 33.45           | 41.01            | 2.12           | 41.06           |
| 56               | 6.55                  | 0.45             | 0.19          | 0.02            | 28.40            | 0.26           | 2.20              | 0.27            | 38.45           | 47.81            | 2.09           | 47.86           |
| 59               | 10.81                 | 0.45             | 0.22          | 0.02            | 32.33            | 0.25           | 2.00              | 0.36            | 42.79           | 53.64            | 1.84           | 53.67           |
| 62               | 1.57                  | 0.37             | 0.18          | 0.02            | 35.59            | 0.35           | 2.24              | 0.46            | 46.03           | 58.19            | 2.09           | 58.23           |

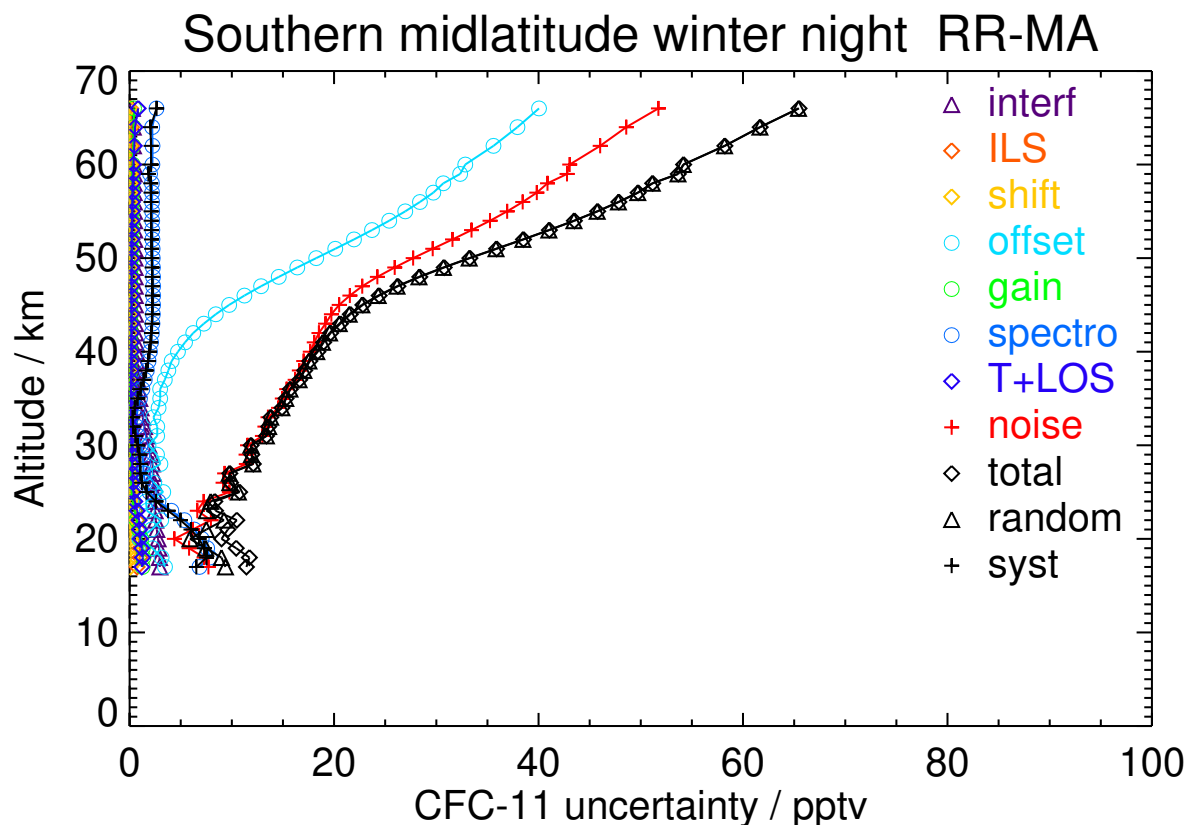**Figure S88.** V8R\_F-11\_561 Southern midlatitude winter night

**Table S90.** CFC-11 error budget for Southern midlatitude spring day. All uncertainties are  $1\sigma$ .

| altitude<br>(km) | mean target<br>(pptv) | interf<br>(pptv) | ILS<br>(pptv) | shift<br>(pptv) | offset<br>(pptv) | gain<br>(pptv) | spectro<br>(pptv) | T+LOS<br>(pptv) | noise<br>(pptv) | random<br>(pptv) | syst<br>(pptv) | total<br>(pptv) |
|------------------|-----------------------|------------------|---------------|-----------------|------------------|----------------|-------------------|-----------------|-----------------|------------------|----------------|-----------------|
| 20               | 64.85                 | 2.91             | 0.70          | 0.04            | 0.83             | 0.99           | 5.73              | 0.76            | 3.85            | 5.86             | 4.95           | 7.67            |
| 23               | 26.60                 | 2.53             | 0.42          | 0.03            | 1.75             | 0.49           | 3.68              | 0.63            | 5.86            | 6.84             | 3.35           | 7.62            |
| 26               | 15.14                 | 2.41             | 0.19          | 0.02            | 2.46             | 0.20           | 1.45              | 0.31            | 7.97            | 8.74             | 1.20           | 8.82            |
| 29               | 9.73                  | 2.12             | 0.27          | 0.05            | 2.83             | 0.12           | 0.85              | 0.20            | 9.77            | 10.42            | 0.57           | 10.43           |
| 32               | 1.72                  | 1.44             | 0.26          | 0.06            | 2.90             | 0.07           | 0.55              | 0.13            | 11.53           | 11.99            | 0.29           | 11.99           |
| 35               | -2.07                 | 0.96             | 0.14          | 0.05            | 2.80             | 0.04           | 0.93              | 0.11            | 13.19           | 13.53            | 0.85           | 13.56           |
| 38               | 0.09                  | 0.71             | 0.07          | 0.02            | 2.88             | 0.07           | 1.60              | 0.13            | 14.88           | 15.18            | 1.55           | 15.25           |
| 41               | 6.75                  | 0.61             | 0.07          | 0.02            | 3.72             | 0.11           | 1.92              | 0.14            | 16.48           | 16.91            | 1.85           | 17.01           |
| 44               | 6.73                  | 0.56             | 0.07          | 0.02            | 5.78             | 0.13           | 1.97              | 0.14            | 18.01           | 18.94            | 1.88           | 19.03           |
| 47               | 4.03                  | 0.53             | 0.09          | 0.01            | 9.44             | 0.14           | 1.90              | 0.14            | 20.38           | 22.47            | 1.80           | 22.54           |
| 50               | 1.28                  | 0.48             | 0.11          | 0.01            | 14.44            | 0.15           | 1.81              | 0.13            | 24.68           | 28.61            | 1.69           | 28.66           |
| 53               | -0.02                 | 0.43             | 0.12          | 0.02            | 19.91            | 0.17           | 1.73              | 0.13            | 30.44           | 36.38            | 1.60           | 36.42           |
| 56               | 0.16                  | 0.36             | 0.14          | 0.02            | 24.87            | 0.20           | 1.67              | 0.15            | 36.01           | 43.78            | 1.53           | 43.80           |
| 59               | -1.30                 | 0.31             | 0.15          | 0.02            | 28.69            | 0.23           | 1.61              | 0.18            | 40.38           | 49.54            | 1.48           | 49.56           |
| 62               | 3.93                  | 0.26             | 0.17          | 0.02            | 32.83            | 0.34           | 1.61              | 0.23            | 45.47           | 56.09            | 1.46           | 56.11           |

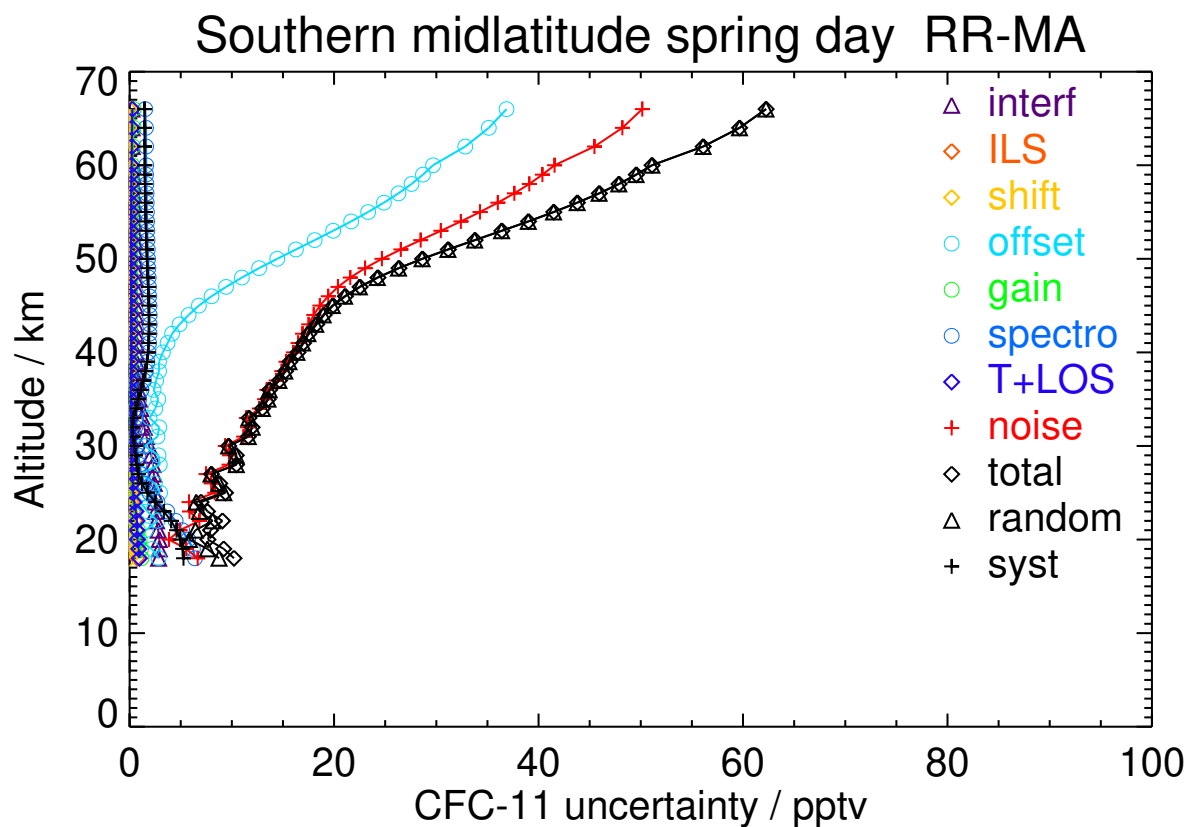**Figure S89.** V8R\_F-11\_561 Southern midlatitude spring day

**Table S91.** CFC-11 error budget for Southern midlatitude spring night. All uncertainties are  $1\sigma$ .

| altitude<br>(km) | mean target<br>(pptv) | interf<br>(pptv) | ILS<br>(pptv) | shift<br>(pptv) | offset<br>(pptv) | gain<br>(pptv) | spectro<br>(pptv) | T+LOS<br>(pptv) | noise<br>(pptv) | random<br>(pptv) | syst<br>(pptv) | total<br>(pptv) |
|------------------|-----------------------|------------------|---------------|-----------------|------------------|----------------|-------------------|-----------------|-----------------|------------------|----------------|-----------------|
| 17               | 113.67                | 2.90             | 0.64          | 0.08            | 2.86             | 1.89           | 8.24              | 1.38            | 6.39            | 7.95             | 8.25           | 11.45           |
| 20               | 73.15                 | 2.94             | 0.78          | 0.05            | 0.82             | 1.33           | 6.93              | 0.98            | 3.82            | 5.54             | 6.68           | 8.68            |
| 23               | 20.89                 | 2.55             | 0.42          | 0.03            | 1.06             | 0.55           | 3.63              | 0.64            | 5.36            | 6.19             | 3.46           | 7.10            |
| 26               | 14.56                 | 2.44             | 0.23          | 0.03            | 1.72             | 0.19           | 1.28              | 0.29            | 7.43            | 8.07             | 0.92           | 8.12            |
| 29               | 9.01                  | 2.13             | 0.39          | 0.06            | 2.18             | 0.15           | 1.12              | 0.22            | 9.25            | 9.79             | 0.71           | 9.81            |
| 32               | 5.69                  | 1.47             | 0.31          | 0.06            | 2.44             | 0.09           | 0.69              | 0.14            | 11.14           | 11.52            | 0.44           | 11.52           |
| 35               | 5.17                  | 0.98             | 0.18          | 0.05            | 2.60             | 0.09           | 1.16              | 0.13            | 12.96           | 13.27            | 0.94           | 13.31           |
| 38               | 5.57                  | 0.72             | 0.09          | 0.03            | 2.79             | 0.09           | 1.62              | 0.13            | 14.73           | 15.02            | 1.54           | 15.10           |
| 41               | 5.79                  | 0.63             | 0.07          | 0.02            | 3.65             | 0.11           | 1.96              | 0.14            | 16.33           | 16.75            | 1.89           | 16.86           |
| 44               | 2.15                  | 0.60             | 0.08          | 0.02            | 5.68             | 0.12           | 2.00              | 0.14            | 17.91           | 18.81            | 1.91           | 18.90           |
| 47               | -2.89                 | 0.56             | 0.09          | 0.01            | 9.32             | 0.11           | 1.88              | 0.13            | 20.30           | 22.36            | 1.79           | 22.43           |
| 50               | -3.82                 | 0.51             | 0.11          | 0.01            | 14.36            | 0.11           | 1.76              | 0.13            | 24.66           | 28.54            | 1.66           | 28.59           |
| 53               | -3.85                 | 0.44             | 0.13          | 0.02            | 19.91            | 0.13           | 1.68              | 0.15            | 30.42           | 36.36            | 1.57           | 36.40           |
| 56               | -4.35                 | 0.37             | 0.15          | 0.02            | 24.99            | 0.17           | 1.63              | 0.18            | 35.97           | 43.81            | 1.52           | 43.83           |
| 59               | -4.45                 | 0.31             | 0.16          | 0.02            | 28.94            | 0.22           | 1.61              | 0.24            | 40.22           | 49.55            | 1.48           | 49.58           |
| 62               | -3.59                 | 0.25             | 0.18          | 0.02            | 33.29            | 0.30           | 1.61              | 0.33            | 45.04           | 56.01            | 1.47           | 56.03           |

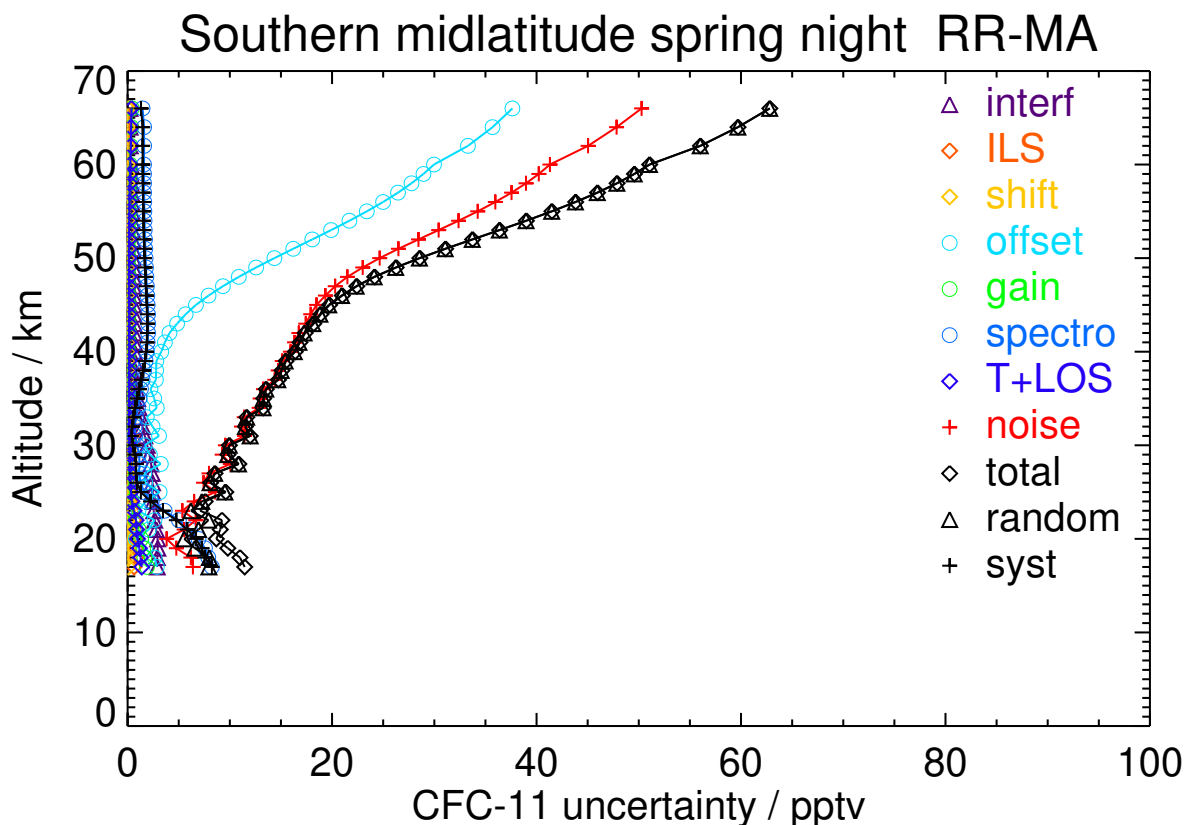**Figure S90.** V8R\_F-11\_561 Southern midlatitude spring night

**Table S92.** CFC-11 error budget for Southern midlatitude summer day. All uncertainties are  $1\sigma$ .

| altitude<br>(km) | mean target<br>(pptv) | interf<br>(pptv) | ILS<br>(pptv) | shift<br>(pptv) | offset<br>(pptv) | gain<br>(pptv) | spectro<br>(pptv) | T+LOS<br>(pptv) | noise<br>(pptv) | random<br>(pptv) | syst<br>(pptv) | total<br>(pptv) |
|------------------|-----------------------|------------------|---------------|-----------------|------------------|----------------|-------------------|-----------------|-----------------|------------------|----------------|-----------------|
| 17               | 169.49                | 2.96             | 1.31          | 0.06            | 2.55             | 2.17           | 10.92             | 1.92            | 5.66            | 7.47             | 10.99          | 13.29           |
| 20               | 107.95                | 2.88             | 1.39          | 0.06            | 1.73             | 1.70           | 10.34             | 1.50            | 4.60            | 6.26             | 10.36          | 12.10           |
| 23               | 32.86                 | 2.57             | 0.81          | 0.03            | 1.48             | 0.68           | 5.58              | 0.87            | 5.45            | 6.40             | 5.53           | 8.45            |
| 26               | 9.00                  | 2.44             | 0.31          | 0.03            | 1.41             | 0.10           | 1.20              | 0.31            | 6.85            | 7.46             | 0.92           | 7.52            |
| 29               | 6.45                  | 2.16             | 0.29          | 0.05            | 1.50             | 0.04           | 0.67              | 0.18            | 8.34            | 8.77             | 0.48           | 8.78            |
| 32               | 3.66                  | 1.47             | 0.33          | 0.08            | 1.79             | 0.05           | 0.57              | 0.14            | 9.95            | 10.23            | 0.35           | 10.24           |
| 35               | 4.43                  | 1.11             | 0.14          | 0.05            | 2.17             | 0.07           | 0.85              | 0.12            | 11.76           | 12.02            | 0.75           | 12.04           |
| 38               | 2.67                  | 0.83             | 0.07          | 0.03            | 2.53             | 0.06           | 1.45              | 0.12            | 13.45           | 13.72            | 1.39           | 13.79           |
| 41               | 0.55                  | 0.65             | 0.05          | 0.03            | 3.10             | 0.07           | 1.86              | 0.13            | 15.08           | 15.41            | 1.82           | 15.52           |
| 44               | 0.19                  | 0.65             | 0.05          | 0.02            | 4.61             | 0.10           | 1.93              | 0.13            | 16.69           | 17.34            | 1.90           | 17.44           |
| 47               | -4.21                 | 0.66             | 0.06          | 0.01            | 7.65             | 0.12           | 1.83              | 0.12            | 18.60           | 20.12            | 1.79           | 20.20           |
| 50               | -3.95                 | 0.61             | 0.08          | 0.02            | 12.32            | 0.15           | 1.72              | 0.12            | 22.14           | 25.35            | 1.66           | 25.40           |
| 53               | 0.81                  | 0.50             | 0.10          | 0.02            | 17.89            | 0.18           | 1.64              | 0.12            | 27.62           | 32.92            | 1.55           | 32.96           |
| 56               | 5.73                  | 0.38             | 0.13          | 0.03            | 23.29            | 0.23           | 1.58              | 0.13            | 33.51           | 40.82            | 1.47           | 40.84           |
| 59               | 9.41                  | 0.28             | 0.15          | 0.03            | 27.65            | 0.28           | 1.55              | 0.14            | 38.30           | 47.24            | 1.41           | 47.26           |
| 62               | 11.90                 | 0.23             | 0.18          | 0.03            | 32.44            | 0.37           | 1.52              | 0.16            | 43.97           | 54.64            | 1.38           | 54.66           |

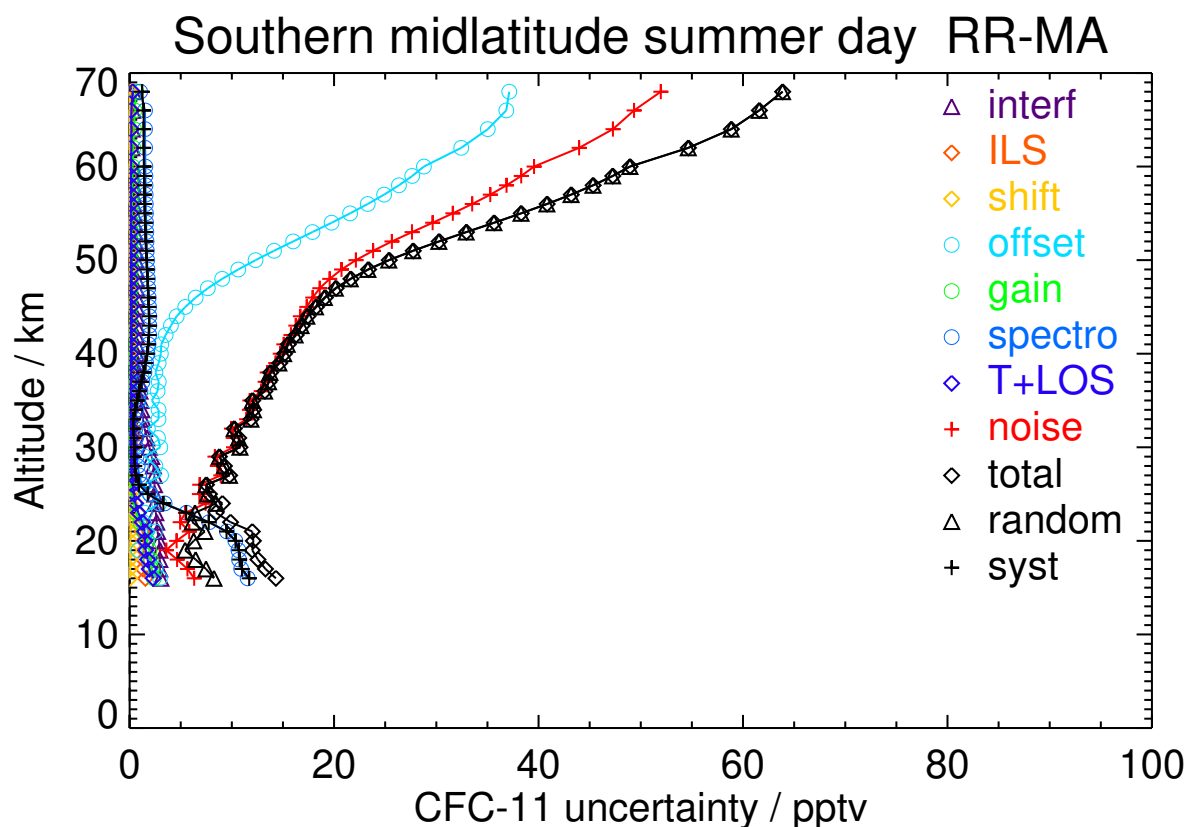**Figure S91.** V8R\_F-11\_561 Southern midlatitude summer day

**Table S93.** CFC-11 error budget for Southern midlatitude summer night. All uncertainties are  $1\sigma$ .

| altitude<br>(km) | mean target<br>(pptv) | interf<br>(pptv) | ILS<br>(pptv) | shift<br>(pptv) | offset<br>(pptv) | gain<br>(pptv) | spectro<br>(pptv) | T+LOS<br>(pptv) | noise<br>(pptv) | random<br>(pptv) | syst<br>(pptv) | total<br>(pptv) |
|------------------|-----------------------|------------------|---------------|-----------------|------------------|----------------|-------------------|-----------------|-----------------|------------------|----------------|-----------------|
| 17               | 172.28                | 3.10             | 1.40          | 0.06            | 2.82             | 2.33           | 11.90             | 2.06            | 6.10            | 8.04             | 11.98          | 14.42           |
| 20               | 107.93                | 2.93             | 1.36          | 0.05            | 1.31             | 1.83           | 10.31             | 1.44            | 4.16            | 5.87             | 10.33          | 11.88           |
| 23               | 31.70                 | 2.61             | 0.87          | 0.02            | 1.13             | 0.76           | 5.72              | 0.91            | 5.14            | 6.11             | 5.66           | 8.33            |
| 26               | 7.70                  | 2.45             | 0.36          | 0.03            | 1.31             | 0.13           | 1.21              | 0.32            | 6.77            | 7.39             | 0.77           | 7.43            |
| 29               | 6.88                  | 2.18             | 0.33          | 0.05            | 1.64             | 0.06           | 0.73              | 0.18            | 8.40            | 8.86             | 0.44           | 8.87            |
| 32               | 8.00                  | 1.49             | 0.42          | 0.08            | 2.03             | 0.07           | 0.64              | 0.15            | 10.06           | 10.39            | 0.45           | 10.40           |
| 35               | 7.65                  | 1.12             | 0.20          | 0.07            | 2.35             | 0.07           | 0.84              | 0.13            | 11.80           | 12.10            | 0.72           | 12.12           |
| 38               | 6.04                  | 0.83             | 0.08          | 0.03            | 2.57             | 0.08           | 1.52              | 0.13            | 13.42           | 13.70            | 1.44           | 13.77           |
| 41               | 6.20                  | 0.70             | 0.09          | 0.03            | 3.14             | 0.12           | 1.86              | 0.14            | 14.90           | 15.25            | 1.79           | 15.36           |
| 44               | 6.43                  | 0.71             | 0.08          | 0.02            | 4.42             | 0.16           | 1.80              | 0.13            | 16.42           | 17.03            | 1.73           | 17.12           |
| 47               | 7.77                  | 0.69             | 0.07          | 0.02            | 7.07             | 0.17           | 1.62              | 0.12            | 18.20           | 19.55            | 1.54           | 19.61           |
| 50               | 4.92                  | 0.61             | 0.07          | 0.03            | 11.41            | 0.18           | 1.49              | 0.13            | 21.39           | 24.25            | 1.37           | 24.29           |
| 53               | 1.46                  | 0.50             | 0.08          | 0.03            | 16.84            | 0.22           | 1.43              | 0.13            | 26.55           | 31.45            | 1.27           | 31.47           |
| 56               | -0.02                 | 0.37             | 0.09          | 0.04            | 22.28            | 0.26           | 1.41              | 0.14            | 32.40           | 39.33            | 1.21           | 39.35           |
| 59               | -0.54                 | 0.27             | 0.10          | 0.04            | 26.77            | 0.31           | 1.42              | 0.17            | 37.41           | 46.01            | 1.19           | 46.03           |
| 62               | 0.61                  | 0.23             | 0.14          | 0.04            | 31.80            | 0.41           | 1.47              | 0.21            | 43.59           | 53.97            | 1.20           | 53.98           |

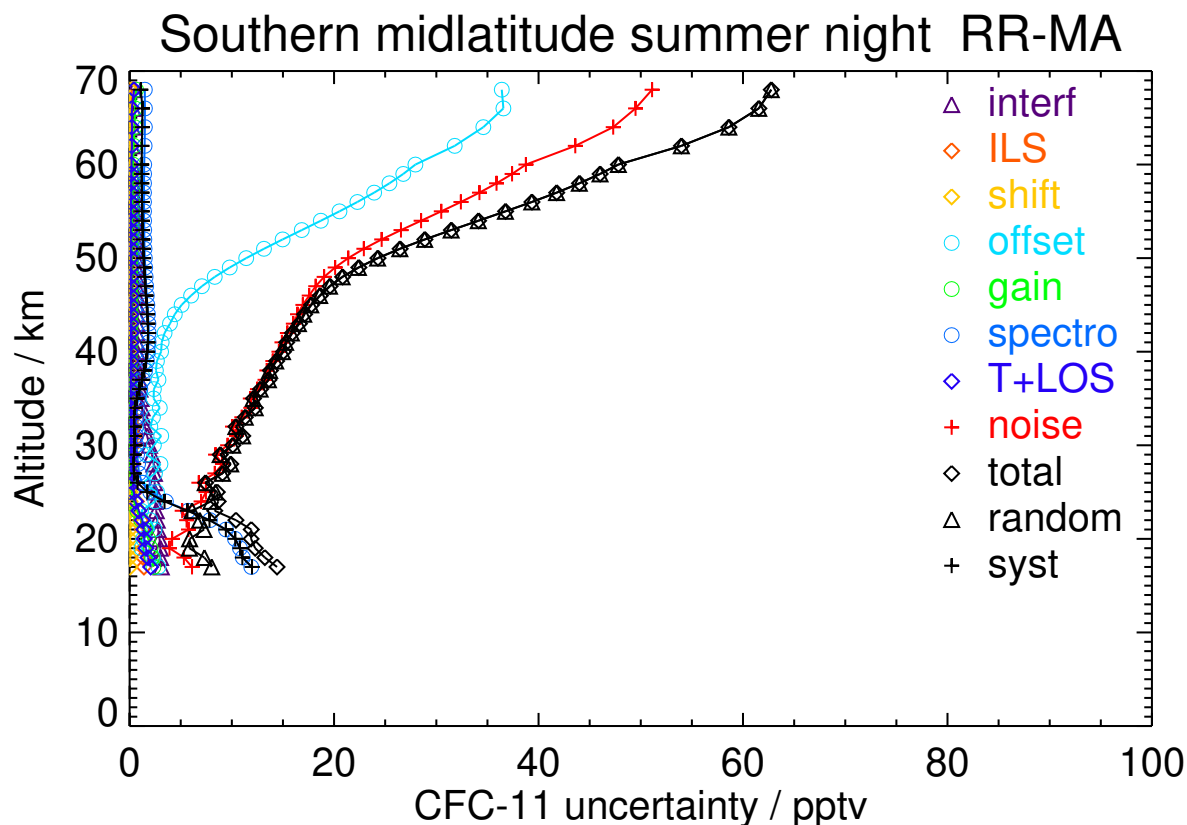**Figure S92.** V8R\_F-11\_561 Southern midlatitude summer night

Table S94. CFC-11 error budget for Southern midlatitude autumn day. All uncertainties are  $1\sigma$ .

| altitude<br>(km) | mean target<br>(pptv) | interf<br>(pptv) | ILS<br>(pptv) | shift<br>(pptv) | offset<br>(pptv) | gain<br>(pptv) | spectro<br>(pptv) | T+LOS<br>(pptv) | noise<br>(pptv) | random<br>(pptv) | syst<br>(pptv) | total<br>(pptv) |
|------------------|-----------------------|------------------|---------------|-----------------|------------------|----------------|-------------------|-----------------|-----------------|------------------|----------------|-----------------|
| 20               | 117.13                | 2.81             | 1.57          | 0.11            | 0.81             | 1.82           | 10.30             | 1.54            | 3.93            | 5.67             | 10.30          | 11.76           |
| 23               | 33.00                 | 2.59             | 0.98          | 0.05            | 1.69             | 0.81           | 6.28              | 1.09            | 5.92            | 7.02             | 6.13           | 9.32            |
| 26               | 11.90                 | 2.41             | 0.34          | 0.02            | 2.40             | 0.25           | 1.87              | 0.36            | 8.09            | 8.88             | 1.44           | 8.99            |
| 29               | 5.75                  | 2.11             | 0.32          | 0.07            | 2.80             | 0.13           | 1.14              | 0.23            | 10.04           | 10.67            | 0.88           | 10.70           |
| 32               | 4.24                  | 1.45             | 0.23          | 0.06            | 2.80             | 0.09           | 0.57              | 0.14            | 11.88           | 12.30            | 0.31           | 12.31           |
| 35               | 7.73                  | 0.97             | 0.17          | 0.05            | 2.80             | 0.07           | 1.05              | 0.13            | 13.53           | 13.87            | 0.84           | 13.89           |
| 38               | 5.63                  | 0.70             | 0.08          | 0.02            | 3.11             | 0.08           | 1.61              | 0.14            | 15.15           | 15.49            | 1.52           | 15.57           |
| 41               | 2.64                  | 0.59             | 0.09          | 0.01            | 4.24             | 0.08           | 2.12              | 0.16            | 16.75           | 17.30            | 2.05           | 17.42           |
| 44               | 2.95                  | 0.55             | 0.14          | <0.01           | 6.97             | 0.09           | 2.31              | 0.16            | 18.59           | 19.87            | 2.26           | 19.99           |
| 47               | 0.94                  | 0.51             | 0.17          | 0.01            | 11.36            | 0.11           | 2.29              | 0.16            | 21.74           | 24.54            | 2.22           | 24.64           |
| 50               | -3.48                 | 0.47             | 0.19          | 0.02            | 16.92            | 0.13           | 2.20              | 0.16            | 26.91           | 31.80            | 2.12           | 31.87           |
| 53               | -6.29                 | 0.40             | 0.21          | 0.02            | 22.57            | 0.16           | 2.11              | 0.17            | 32.84           | 39.86            | 2.02           | 39.91           |
| 56               | -5.33                 | 0.34             | 0.22          | 0.02            | 27.44            | 0.20           | 2.05              | 0.20            | 37.99           | 46.87            | 1.94           | 46.91           |
| 59               | 4.99                  | 0.28             | 0.25          | 0.03            | 29.84            | 0.21           | 1.79              | 0.40            | 40.56           | 50.36            | 1.72           | 50.39           |
| 62               | -1.04                 | 0.25             | 0.23          | 0.02            | 34.93            | 0.30           | 1.95              | 0.31            | 45.74           | 57.56            | 1.81           | 57.59           |

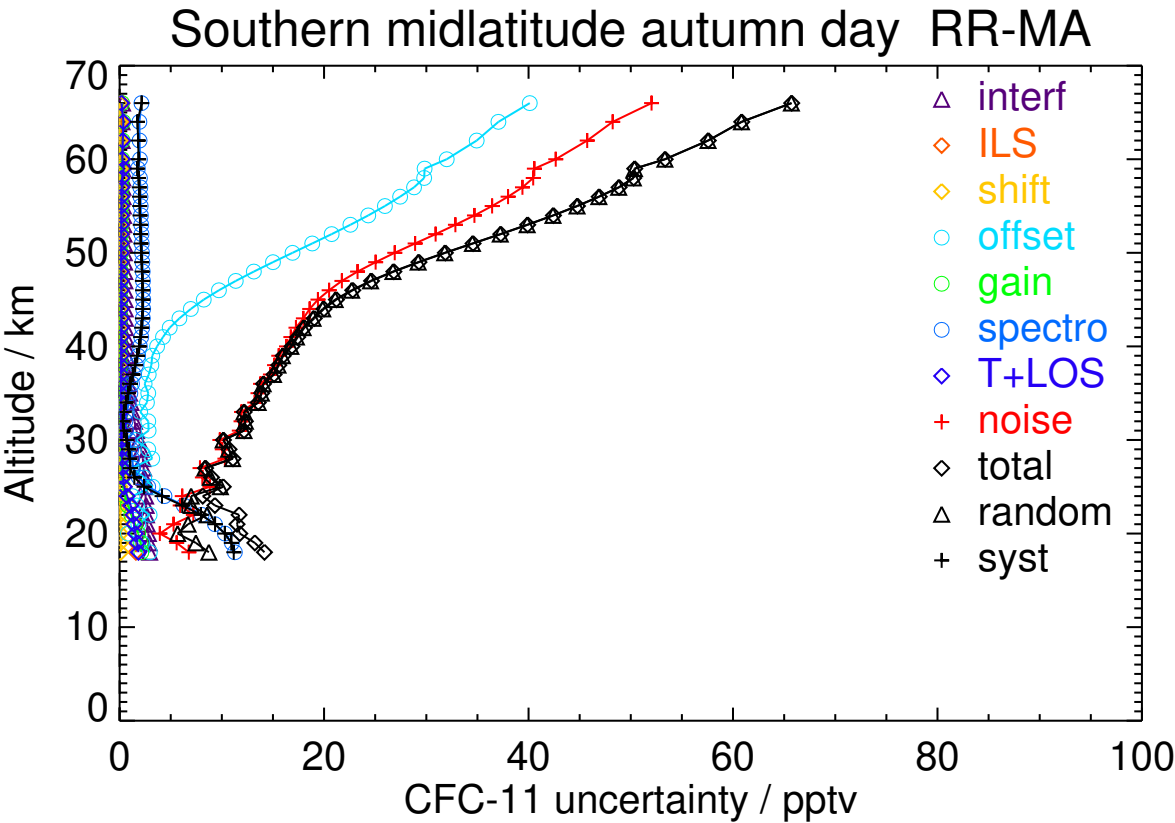

Figure S93. V8R\_F-11\_561 Southern midlatitude autumn day

Table S95. CFC-11 error budget for Southern midlatitude autumn night. All uncertainties are  $1\sigma$ .

| altitude<br>(km) | mean target<br>(pptv) | interf<br>(pptv) | ILS<br>(pptv) | shift<br>(pptv) | offset<br>(pptv) | gain<br>(pptv) | spectro<br>(pptv) | T+LOS<br>(pptv) | noise<br>(pptv) | random<br>(pptv) | syst<br>(pptv) | total<br>(pptv) |
|------------------|-----------------------|------------------|---------------|-----------------|------------------|----------------|-------------------|-----------------|-----------------|------------------|----------------|-----------------|
| 20               | 117.89                | 2.85             | 1.52          | 0.09            | 0.79             | 1.80           | 10.80             | 1.60            | 3.99            | 5.73             | 10.79          | 12.22           |
| 23               | 32.31                 | 2.58             | 1.00          | 0.03            | 1.60             | 0.94           | 6.40              | 1.08            | 5.89            | 7.14             | 6.08           | 9.38            |
| 26               | 10.76                 | 2.39             | 0.31          | 0.02            | 2.32             | 0.20           | 1.88              | 0.36            | 8.06            | 8.83             | 1.39           | 8.94            |
| 29               | 2.24                  | 2.09             | 0.26          | 0.06            | 2.66             | 0.10           | 0.93              | 0.22            | 10.01           | 10.59            | 0.78           | 10.61           |
| 32               | 5.00                  | 1.44             | 0.23          | 0.06            | 2.72             | 0.08           | 0.55              | 0.14            | 11.87           | 12.28            | 0.28           | 12.28           |
| 35               | 4.64                  | 0.97             | 0.15          | 0.05            | 2.75             | 0.07           | 0.92              | 0.12            | 13.54           | 13.87            | 0.76           | 13.89           |
| 38               | 3.88                  | 0.70             | 0.07          | 0.02            | 3.06             | 0.07           | 1.61              | 0.13            | 15.23           | 15.56            | 1.52           | 15.63           |
| 41               | 1.47                  | 0.61             | 0.10          | 0.01            | 4.28             | 0.07           | 2.12              | 0.16            | 16.80           | 17.36            | 2.05           | 17.48           |
| 44               | 1.91                  | 0.56             | 0.13          | <0.01           | 6.93             | 0.08           | 2.27              | 0.16            | 18.54           | 19.81            | 2.22           | 19.93           |
| 47               | 0.13                  | 0.52             | 0.15          | 0.01            | 11.27            | 0.11           | 2.23              | 0.16            | 21.69           | 24.46            | 2.16           | 24.55           |
| 50               | -1.33                 | 0.47             | 0.16          | 0.02            | 16.80            | 0.13           | 2.14              | 0.16            | 26.87           | 31.69            | 2.06           | 31.76           |
| 53               | -4.44                 | 0.40             | 0.17          | 0.02            | 22.46            | 0.16           | 2.07              | 0.17            | 32.76           | 39.72            | 1.96           | 39.77           |
| 56               | -8.54                 | 0.34             | 0.18          | 0.02            | 27.36            | 0.19           | 2.03              | 0.21            | 37.90           | 46.75            | 1.90           | 46.79           |
| 59               | 7.61                  | 0.31             | 0.21          | 0.02            | 30.32            | 0.28           | 1.86              | 0.21            | 41.08           | 51.07            | 1.68           | 51.10           |
| 62               | -14.96                | 0.25             | 0.19          | 0.02            | 35.08            | 0.31           | 2.05              | 0.34            | 45.88           | 57.76            | 1.85           | 57.79           |

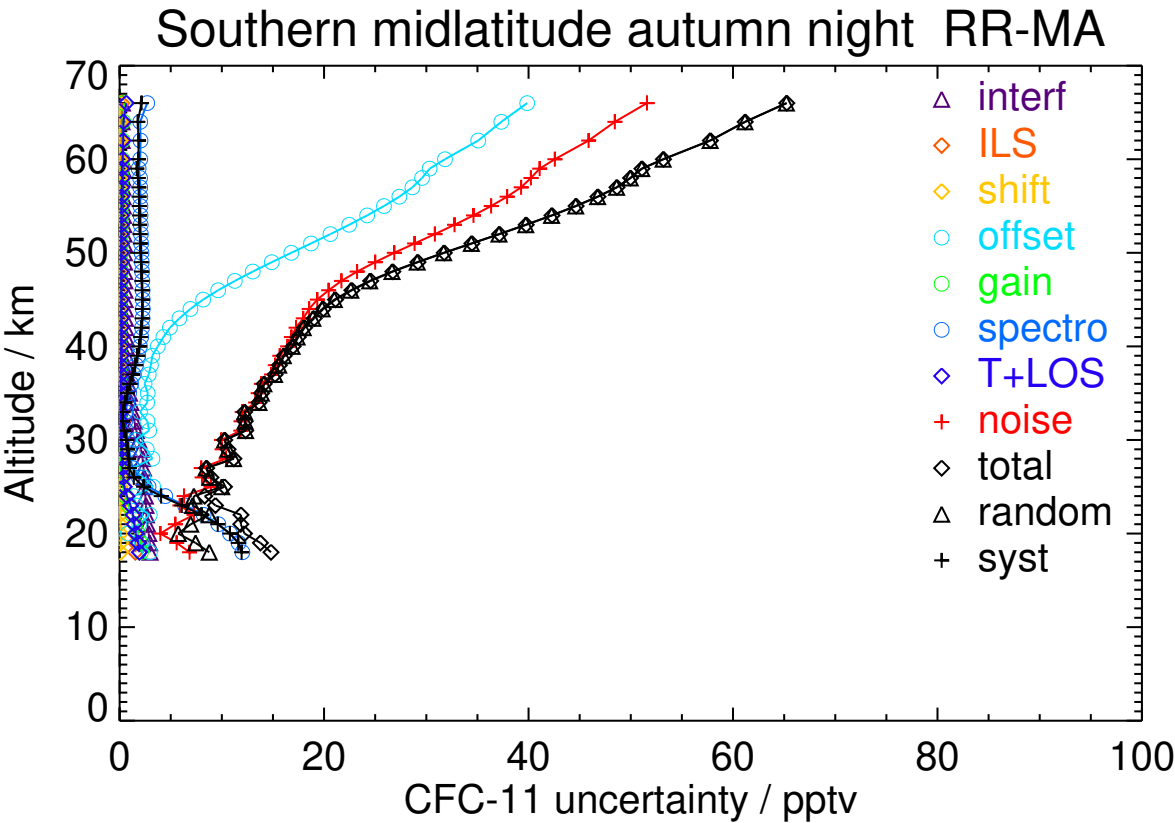

Figure S94. V8R\_F-11\_561 Southern midlatitude autumn night

**Table S96.** CFC-11 error budget for Southern polar winter day. All uncertainties are  $1\sigma$ .

| altitude<br>(km) | mean target<br>(pptv) | interf<br>(pptv) | ILS<br>(pptv) | shift<br>(pptv) | offset<br>(pptv) | gain<br>(pptv) | spectro<br>(pptv) | T+LOS<br>(pptv) | noise<br>(pptv) | random<br>(pptv) | syst<br>(pptv) | total<br>(pptv) |
|------------------|-----------------------|------------------|---------------|-----------------|------------------|----------------|-------------------|-----------------|-----------------|------------------|----------------|-----------------|
| 17               | 16.42                 | 3.19             | 0.35          | 0.05            | 4.31             | 0.27           | 1.23              | 0.49            | 10.22           | 11.60            | 0.82           | 11.63           |
| 20               | 9.79                  | 3.02             | 0.45          | 0.04            | 1.55             | 0.22           | 1.91              | 0.31            | 6.51            | 7.53             | 1.13           | 7.61            |
| 23               | -1.78                 | 2.67             | 0.33          | 0.02            | 2.68             | 0.06           | 1.39              | 0.30            | 9.91            | 10.66            | 0.96           | 10.71           |
| 26               | 1.59                  | 2.56             | 0.33          | 0.05            | 2.87             | 0.06           | 1.14              | 0.24            | 11.79           | 12.42            | 0.97           | 12.46           |
| 29               | 4.95                  | 2.28             | 0.41          | 0.06            | 2.72             | 0.07           | 0.81              | 0.18            | 12.97           | 13.46            | 0.65           | 13.48           |
| 32               | 4.19                  | 1.63             | 0.33          | 0.05            | 2.92             | 0.07           | 0.53              | 0.13            | 14.25           | 14.64            | 0.35           | 14.65           |
| 35               | 1.53                  | 1.13             | 0.16          | 0.04            | 3.46             | 0.10           | 1.00              | 0.12            | 15.63           | 16.05            | 0.86           | 16.08           |
| 38               | 1.07                  | 0.84             | 0.12          | 0.03            | 4.47             | 0.15           | 1.49              | 0.14            | 17.02           | 17.62            | 1.39           | 17.68           |
| 41               | -0.96                 | 0.70             | 0.15          | 0.03            | 6.33             | 0.20           | 1.71              | 0.17            | 18.36           | 19.44            | 1.62           | 19.51           |
| 44               | -2.01                 | 0.62             | 0.17          | 0.02            | 9.35             | 0.23           | 1.75              | 0.17            | 20.14           | 22.23            | 1.66           | 22.29           |
| 47               | -0.93                 | 0.57             | 0.18          | 0.02            | 13.76            | 0.26           | 1.74              | 0.17            | 23.45           | 27.21            | 1.63           | 27.26           |
| 50               | 3.75                  | 0.52             | 0.18          | 0.02            | 19.07            | 0.28           | 1.71              | 0.17            | 28.64           | 34.42            | 1.56           | 34.46           |
| 53               | 7.69                  | 0.48             | 0.18          | 0.02            | 24.38            | 0.30           | 1.67              | 0.17            | 34.44           | 42.20            | 1.50           | 42.23           |
| 56               | 8.45                  | 0.44             | 0.19          | 0.02            | 28.85            | 0.34           | 1.64              | 0.18            | 39.40           | 48.84            | 1.46           | 48.87           |
| 59               | 52.01                 | 0.29             | 0.10          | 0.02            | 30.23            | 0.42           | 1.25              | 0.16            | 41.31           | 51.19            | 1.32           | 51.21           |
| 62               | 1.04                  | 0.36             | 0.17          | 0.03            | 35.30            | 0.42           | 1.50              | 0.18            | 46.62           | 58.48            | 1.37           | 58.50           |

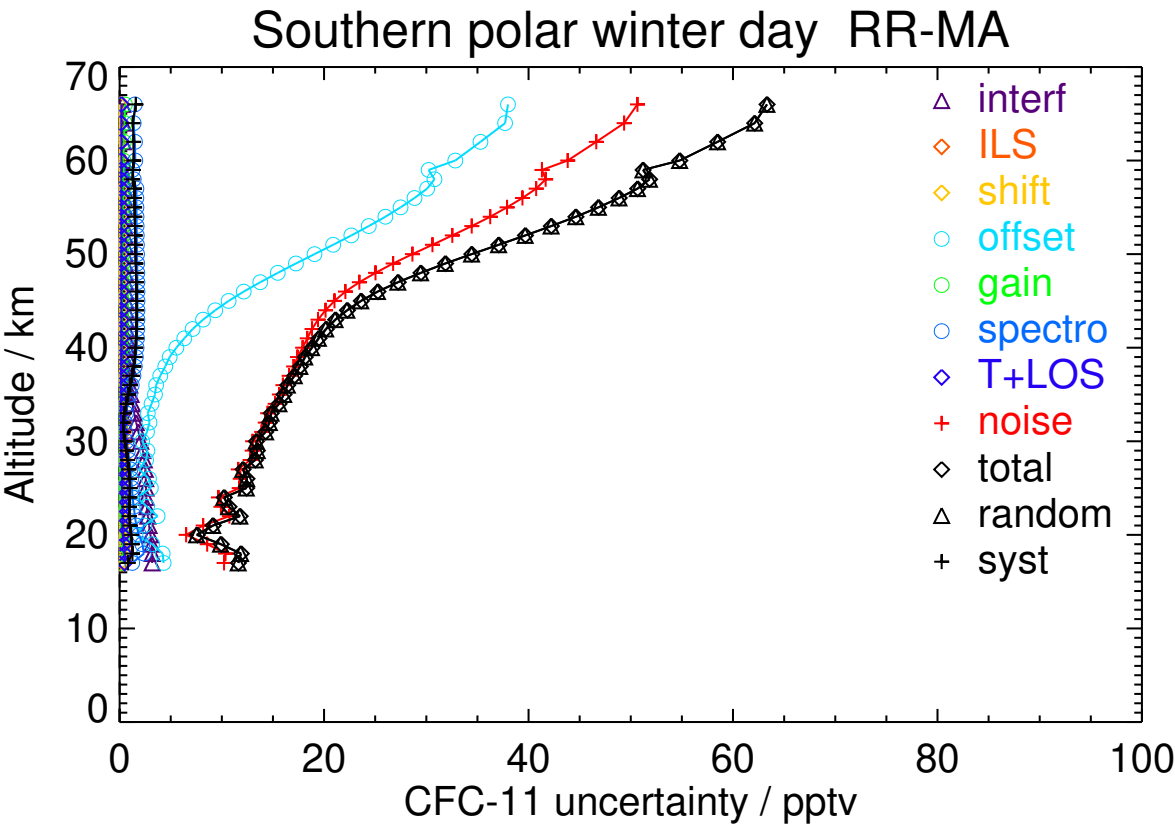

**Figure S95.** V8R\_F-11\_561 Southern polar winter day

Table S97. CFC-11 error budget for Southern polar winter night. All uncertainties are  $1\sigma$ .

| altitude<br>(km) | mean target<br>(pptv) | interf<br>(pptv) | ILS<br>(pptv) | shift<br>(pptv) | offset<br>(pptv) | gain<br>(pptv) | spectro<br>(pptv) | T+LOS<br>(pptv) | noise<br>(pptv) | random<br>(pptv) | syst<br>(pptv) | total<br>(pptv) |
|------------------|-----------------------|------------------|---------------|-----------------|------------------|----------------|-------------------|-----------------|-----------------|------------------|----------------|-----------------|
| 20               | 15.36                 | 2.89             | 0.76          | 0.08            | 2.19             | 0.30           | 2.47              | 0.40            | 7.18            | 8.34             | 1.47           | 8.47            |
| 23               | -0.50                 | 2.59             | 0.39          | 0.03            | 3.30             | 0.07           | 1.45              | 0.32            | 10.48           | 11.36            | 0.88           | 11.39           |
| 26               | 2.04                  | 2.52             | 0.33          | 0.04            | 3.10             | 0.05           | 1.04              | 0.24            | 11.90           | 12.57            | 0.91           | 12.60           |
| 29               | 2.89                  | 2.26             | 0.41          | 0.05            | 2.77             | 0.07           | 0.87              | 0.18            | 13.08           | 13.57            | 0.73           | 13.59           |
| 32               | 2.91                  | 1.63             | 0.37          | 0.05            | 2.90             | 0.08           | 0.57              | 0.14            | 14.25           | 14.65            | 0.37           | 14.65           |
| 35               | -0.31                 | 1.12             | 0.22          | 0.04            | 3.41             | 0.11           | 0.87              | 0.12            | 15.60           | 16.01            | 0.78           | 16.03           |
| 38               | -3.10                 | 0.83             | 0.16          | 0.03            | 4.40             | 0.17           | 1.42              | 0.14            | 16.95           | 17.54            | 1.32           | 17.59           |
| 41               | -5.30                 | 0.67             | 0.17          | 0.03            | 6.14             | 0.22           | 1.68              | 0.16            | 18.29           | 19.31            | 1.57           | 19.38           |
| 44               | -3.27                 | 0.59             | 0.17          | 0.03            | 9.05             | 0.24           | 1.73              | 0.17            | 20.04           | 22.00            | 1.60           | 22.06           |
| 47               | -1.81                 | 0.54             | 0.17          | 0.02            | 13.37            | 0.26           | 1.69              | 0.17            | 23.17           | 26.77            | 1.53           | 26.81           |
| 50               | -1.96                 | 0.51             | 0.17          | 0.02            | 18.66            | 0.27           | 1.63              | 0.17            | 28.17           | 33.80            | 1.44           | 33.83           |
| 53               | -2.26                 | 0.48             | 0.17          | 0.03            | 24.00            | 0.29           | 1.59              | 0.17            | 33.89           | 41.54            | 1.37           | 41.56           |
| 56               | -2.83                 | 0.44             | 0.17          | 0.03            | 28.60            | 0.33           | 1.56              | 0.17            | 39.00           | 48.37            | 1.33           | 48.39           |
| 59               | 1.27                  | 0.36             | 0.16          | 0.03            | 30.97            | 0.37           | 1.20              | 0.14            | 42.21           | 52.36            | 1.08           | 52.37           |
| 62               | -8.34                 | 0.37             | 0.18          | 0.03            | 35.44            | 0.43           | 1.51              | 0.18            | 46.96           | 58.84            | 1.30           | 58.85           |

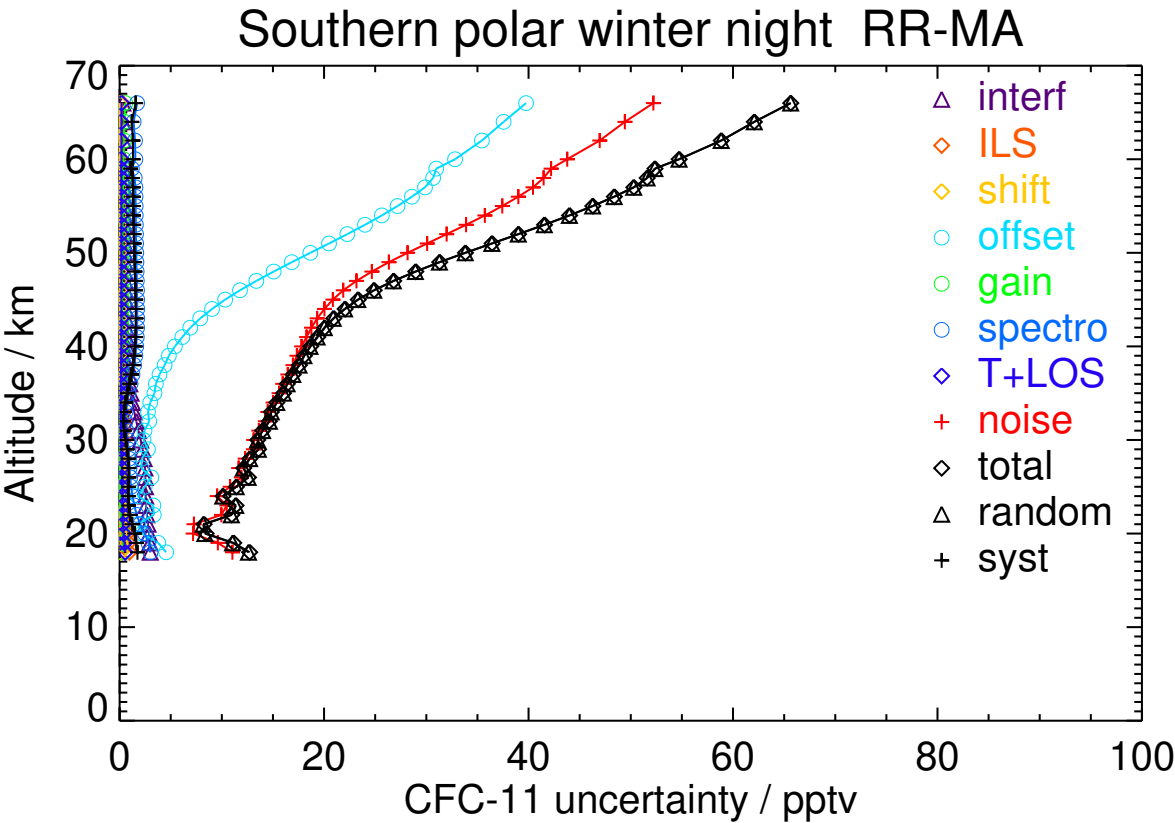

Figure S96. V8R\_F-11\_561 Southern polar winter night

Table S98. CFC-11 error budget for Southern polar spring day. All uncertainties are  $1\sigma$ .

| altitude<br>(km) | mean target<br>(pptv) | interf<br>(pptv) | ILS<br>(pptv) | shift<br>(pptv) | offset<br>(pptv) | gain<br>(pptv) | spectro<br>(pptv) | T+LOS<br>(pptv) | noise<br>(pptv) | random<br>(pptv) | syst<br>(pptv) | total<br>(pptv) |
|------------------|-----------------------|------------------|---------------|-----------------|------------------|----------------|-------------------|-----------------|-----------------|------------------|----------------|-----------------|
| 20               | 7.56                  | 3.23             | 0.30          | 0.01            | 1.23             | 0.20           | 1.19              | 0.16            | 5.25            | 6.39             | 0.47           | 6.41            |
| 23               | 5.34                  | 2.70             | 0.21          | 0.02            | 2.18             | 0.16           | 0.95              | 0.18            | 7.09            | 7.93             | 0.57           | 7.95            |
| 26               | 5.76                  | 2.61             | 0.44          | 0.03            | 2.60             | 0.11           | 0.65              | 0.18            | 8.38            | 9.18             | 0.47           | 9.20            |
| 29               | 4.53                  | 2.33             | 0.43          | 0.04            | 2.82             | 0.09           | 0.67              | 0.14            | 9.56            | 10.25            | 0.49           | 10.27           |
| 32               | 3.04                  | 1.62             | 0.52          | 0.06            | 2.98             | 0.10           | 0.70              | 0.14            | 10.95           | 11.48            | 0.70           | 11.50           |
| 35               | 2.09                  | 1.10             | 0.32          | 0.07            | 3.05             | 0.12           | 0.92              | 0.13            | 12.50           | 12.93            | 0.82           | 12.95           |
| 38               | 3.13                  | 0.79             | 0.26          | 0.05            | 2.93             | 0.17           | 1.06              | 0.12            | 14.11           | 14.44            | 1.01           | 14.48           |
| 41               | 1.53                  | 0.62             | 0.27          | 0.05            | 3.33             | 0.20           | 1.14              | 0.12            | 15.72           | 16.10            | 1.03           | 16.13           |
| 44               | -1.43                 | 0.54             | 0.22          | 0.05            | 4.92             | 0.21           | 1.13              | 0.11            | 17.36           | 18.06            | 1.03           | 18.09           |
| 47               | -1.60                 | 0.50             | 0.18          | 0.04            | 8.25             | 0.22           | 1.11              | 0.11            | 19.59           | 21.27            | 1.00           | 21.30           |
| 50               | 0.81                  | 0.45             | 0.15          | 0.03            | 13.06            | 0.24           | 1.09              | 0.11            | 23.62           | 27.00            | 0.94           | 27.01           |
| 53               | 4.45                  | 0.37             | 0.13          | 0.03            | 18.44            | 0.27           | 1.08              | 0.10            | 29.23           | 34.57            | 0.89           | 34.58           |
| 56               | 7.89                  | 0.29             | 0.11          | 0.03            | 23.44            | 0.32           | 1.09              | 0.11            | 34.97           | 42.10            | 0.87           | 42.11           |
| 59               | 8.54                  | 0.24             | 0.11          | 0.04            | 27.34            | 0.37           | 1.10              | 0.11            | 39.68           | 48.19            | 0.88           | 48.20           |
| 62               | 6.74                  | 0.25             | 0.12          | 0.04            | 31.58            | 0.47           | 1.13              | 0.13            | 45.41           | 55.32            | 0.93           | 55.33           |

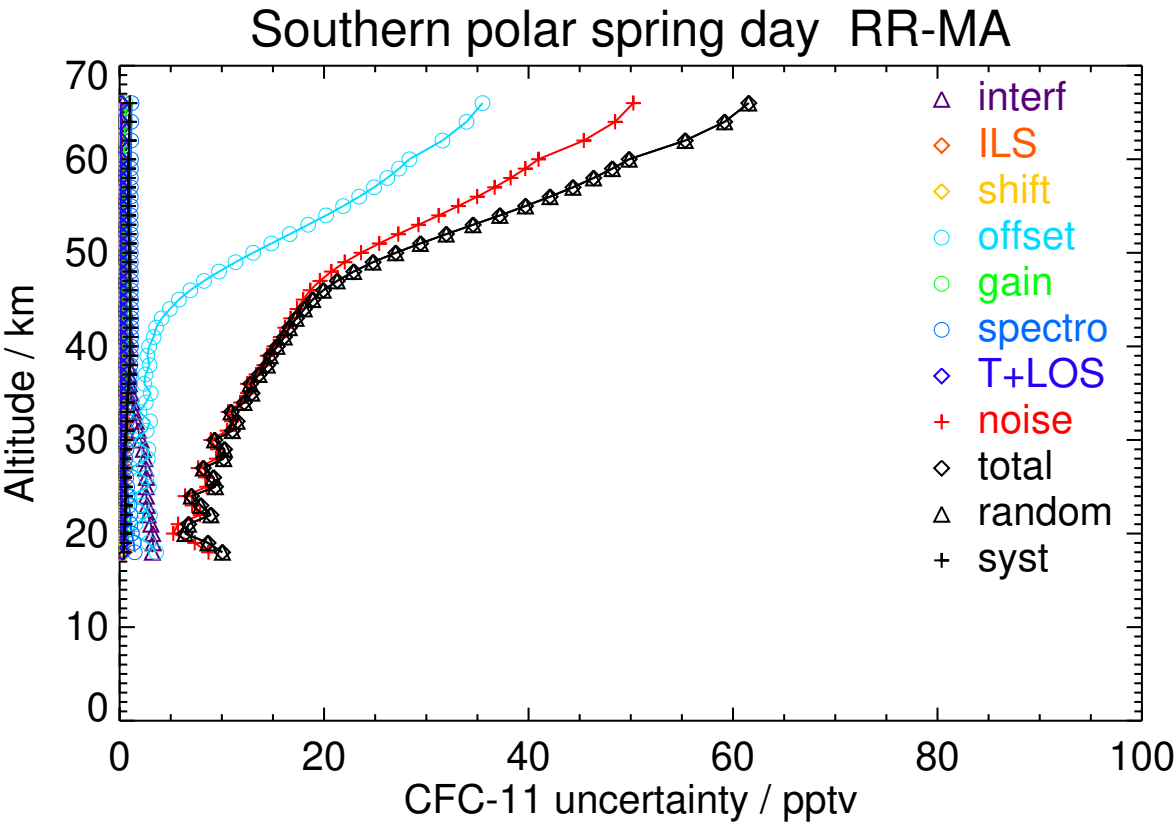

Figure S97. V8R\_F-11\_561 Southern polar spring day

**Table S99.** CFC-11 error budget for Southern polar spring night. All uncertainties are  $1\sigma$ .

| altitude<br>(km) | mean target<br>(pptv) | interf<br>(pptv) | ILS<br>(pptv) | shift<br>(pptv) | offset<br>(pptv) | gain<br>(pptv) | spectro<br>(pptv) | T+LOS<br>(pptv) | noise<br>(pptv) | random<br>(pptv) | syst<br>(pptv) | total<br>(pptv) |
|------------------|-----------------------|------------------|---------------|-----------------|------------------|----------------|-------------------|-----------------|-----------------|------------------|----------------|-----------------|
| 20               | 15.00                 | 3.06             | 0.32          | 0.02            | 1.05             | 0.36           | 1.75              | 0.22            | 4.78            | 5.97             | 1.01           | 6.06            |
| 23               | 8.06                  | 2.68             | 0.26          | 0.03            | 1.93             | 0.22           | 1.21              | 0.23            | 6.65            | 7.49             | 0.82           | 7.54            |
| 26               | 8.66                  | 2.59             | 0.53          | 0.04            | 2.36             | 0.12           | 0.90              | 0.20            | 8.03            | 8.81             | 0.57           | 8.83            |
| 29               | 4.29                  | 2.29             | 0.46          | 0.05            | 2.58             | 0.11           | 0.72              | 0.15            | 9.42            | 10.06            | 0.48           | 10.07           |
| 32               | 5.33                  | 1.58             | 0.47          | 0.06            | 2.77             | 0.12           | 0.79              | 0.14            | 10.96           | 11.43            | 0.65           | 11.45           |
| 35               | 4.76                  | 1.11             | 0.28          | 0.06            | 2.88             | 0.13           | 1.00              | 0.13            | 12.59           | 12.97            | 0.86           | 13.00           |
| 38               | 3.72                  | 0.81             | 0.21          | 0.04            | 2.96             | 0.15           | 1.28              | 0.13            | 14.18           | 14.51            | 1.20           | 14.56           |
| 41               | 1.27                  | 0.63             | 0.21          | 0.04            | 3.45             | 0.19           | 1.39              | 0.12            | 15.76           | 16.15            | 1.33           | 16.21           |
| 44               | 2.29                  | 0.56             | 0.19          | 0.03            | 5.14             | 0.20           | 1.32              | 0.11            | 17.40           | 18.16            | 1.21           | 18.20           |
| 47               | -2.75                 | 0.51             | 0.17          | 0.02            | 8.56             | 0.18           | 1.21              | 0.11            | 19.69           | 21.49            | 1.07           | 21.52           |
| 50               | -8.96                 | 0.45             | 0.15          | 0.02            | 13.45            | 0.17           | 1.13              | 0.11            | 23.91           | 27.44            | 0.99           | 27.46           |
| 53               | -11.11                | 0.37             | 0.13          | 0.03            | 18.91            | 0.19           | 1.07              | 0.11            | 29.65           | 35.17            | 0.93           | 35.18           |
| 56               | -11.71                | 0.29             | 0.12          | 0.03            | 23.93            | 0.22           | 1.04              | 0.12            | 35.35           | 42.69            | 0.91           | 42.70           |
| 59               | -14.22                | 0.25             | 0.12          | 0.03            | 27.81            | 0.28           | 1.03              | 0.13            | 39.91           | 48.65            | 0.90           | 48.66           |
| 62               | -14.21                | 0.26             | 0.14          | 0.03            | 32.04            | 0.38           | 1.06              | 0.17            | 45.34           | 55.52            | 0.95           | 55.53           |

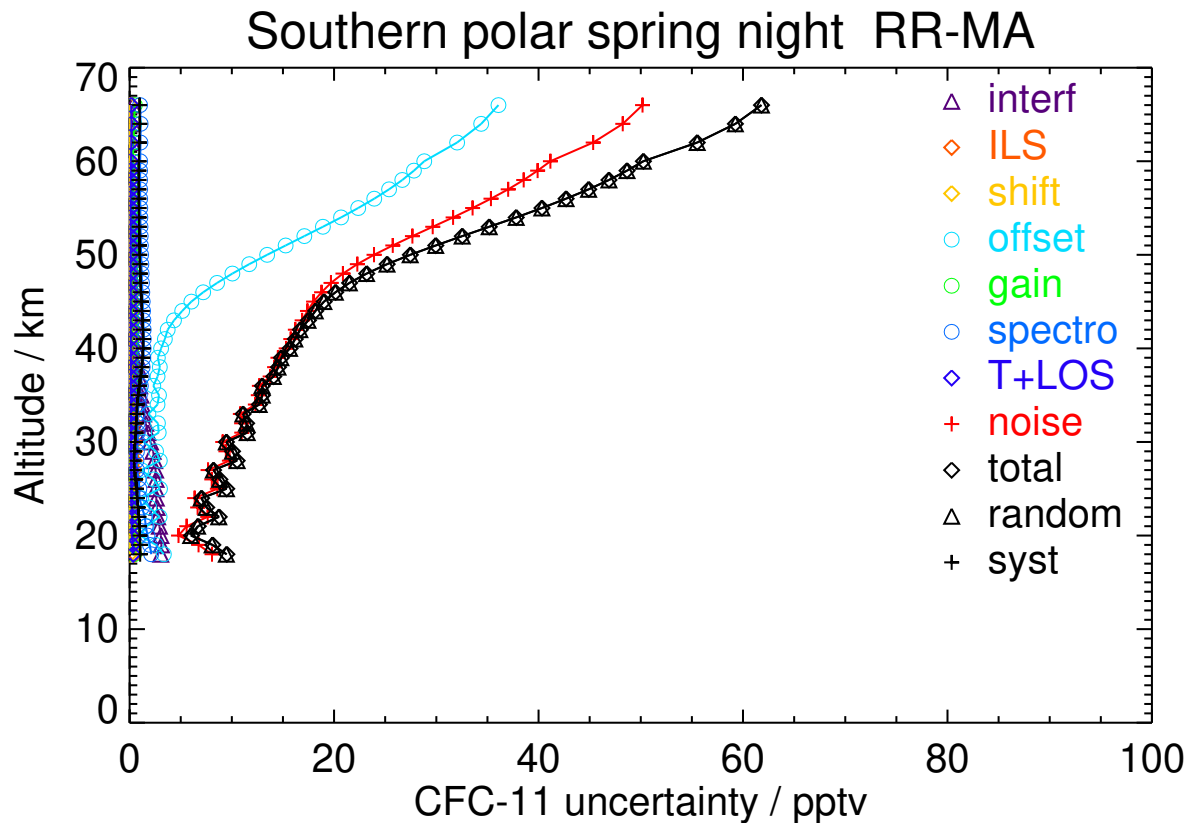

**Figure S98.** V8R\_F-11\_561 Southern polar spring night

**Table S100.** CFC-11 error budget for Southern polar summer day. All uncertainties are  $1\sigma$ .

| altitude<br>(km) | mean target<br>(pptv) | interf<br>(pptv) | ILS<br>(pptv) | shift<br>(pptv) | offset<br>(pptv) | gain<br>(pptv) | spectro<br>(pptv) | T+LOS<br>(pptv) | noise<br>(pptv) | random<br>(pptv) | syst<br>(pptv) | total<br>(pptv) |
|------------------|-----------------------|------------------|---------------|-----------------|------------------|----------------|-------------------|-----------------|-----------------|------------------|----------------|-----------------|
| 17               | 119.20                | 3.04             | 0.96          | 0.10            | 2.67             | 2.12           | 9.01              | 1.34            | 5.76            | 7.40             | 9.12           | 11.74           |
| 20               | 66.98                 | 2.93             | 0.63          | 0.06            | 0.94             | 1.16           | 6.08              | 0.81            | 3.48            | 5.17             | 5.85           | 7.81            |
| 23               | 16.79                 | 2.64             | 0.29          | 0.04            | 1.57             | 0.40           | 2.86              | 0.50            | 5.11            | 6.07             | 2.72           | 6.65            |
| 26               | 6.36                  | 2.46             | 0.26          | 0.05            | 2.19             | 0.10           | 0.78              | 0.21            | 6.99            | 7.77             | 0.31           | 7.77            |
| 29               | 6.10                  | 2.20             | 0.35          | 0.04            | 2.70             | 0.07           | 0.91              | 0.20            | 8.71            | 9.41             | 0.73           | 9.44            |
| 32               | 1.55                  | 1.53             | 0.52          | 0.09            | 2.97             | 0.05           | 0.63              | 0.17            | 10.33           | 10.88            | 0.56           | 10.89           |
| 35               | 5.61                  | 1.08             | 0.23          | 0.08            | 2.98             | 0.05           | 0.63              | 0.13            | 11.81           | 12.24            | 0.51           | 12.25           |
| 38               | 4.14                  | 0.81             | 0.12          | 0.05            | 2.89             | 0.08           | 1.13              | 0.13            | 13.18           | 13.52            | 1.04           | 13.56           |
| 41               | 1.00                  | 0.72             | 0.16          | 0.04            | 3.07             | 0.10           | 1.57              | 0.14            | 14.57           | 14.91            | 1.54           | 14.99           |
| 44               | 0.58                  | 0.65             | 0.11          | 0.04            | 3.80             | 0.15           | 1.76              | 0.14            | 15.97           | 16.43            | 1.73           | 16.52           |
| 47               | 2.09                  | 0.62             | 0.11          | 0.03            | 5.53             | 0.17           | 1.68              | 0.14            | 17.37           | 18.25            | 1.64           | 18.32           |
| 50               | -0.93                 | 0.59             | 0.12          | 0.03            | 8.83             | 0.18           | 1.55              | 0.14            | 19.54           | 21.45            | 1.50           | 21.50           |
| 53               | -1.68                 | 0.53             | 0.12          | 0.03            | 13.42            | 0.19           | 1.45              | 0.14            | 23.35           | 26.94            | 1.39           | 26.98           |
| 56               | -3.02                 | 0.45             | 0.10          | 0.04            | 18.40            | 0.24           | 1.42              | 0.16            | 28.49           | 33.93            | 1.34           | 33.95           |
| 59               | -5.38                 | 0.35             | 0.09          | 0.05            | 22.70            | 0.30           | 1.45              | 0.20            | 33.70           | 40.64            | 1.35           | 40.66           |
| 62               | -7.81                 | 0.25             | 0.13          | 0.05            | 27.81            | 0.44           | 1.55              | 0.27            | 41.83           | 50.24            | 1.43           | 50.26           |

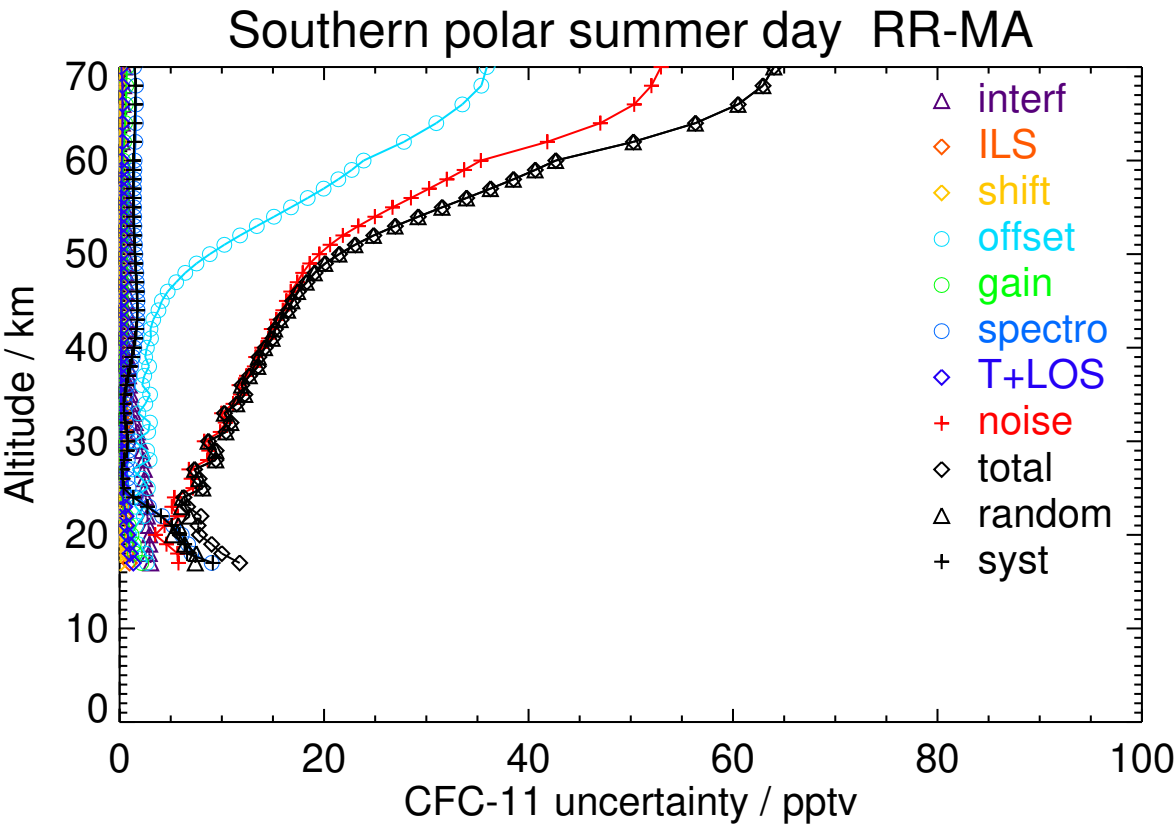

**Figure S99.** V8R\_F-11\_561 Southern polar summer day

**Table S101.** CFC-11 error budget for Southern polar summer night. All uncertainties are  $1\sigma$ .

| altitude<br>(km) | mean target<br>(pptv) | interf<br>(pptv) | ILS<br>(pptv) | shift<br>(pptv) | offset<br>(pptv) | gain<br>(pptv) | spectro<br>(pptv) | T+LOS<br>(pptv) | noise<br>(pptv) | random<br>(pptv) | syst<br>(pptv) | total<br>(pptv) |
|------------------|-----------------------|------------------|---------------|-----------------|------------------|----------------|-------------------|-----------------|-----------------|------------------|----------------|-----------------|
| 17               | 122.16                | 3.00             | 0.72          | 0.09            | 2.78             | 1.90           | 8.56              | 1.36            | 5.99            | 7.60             | 8.60           | 11.48           |
| 20               | 76.42                 | 2.88             | 0.78          | 0.02            | 1.07             | 1.35           | 6.97              | 0.99            | 3.88            | 5.23             | 7.01           | 8.74            |
| 23               | 15.82                 | 2.57             | 0.32          | 0.03            | 1.71             | 0.47           | 3.38              | 0.62            | 5.65            | 6.52             | 3.32           | 7.32            |
| 26               | 6.72                  | 2.42             | 0.16          | 0.03            | 2.32             | 0.10           | 0.71              | 0.24            | 7.65            | 8.38             | 0.35           | 8.38            |
| 29               | 5.31                  | 2.17             | 0.28          | 0.05            | 2.70             | 0.07           | 0.82              | 0.21            | 9.30            | 9.94             | 0.69           | 9.97            |
| 32               | 2.95                  | 1.43             | 0.35          | 0.08            | 2.78             | 0.06           | 0.56              | 0.15            | 10.92           | 11.37            | 0.37           | 11.38           |
| 35               | 5.40                  | 1.03             | 0.20          | 0.06            | 2.79             | 0.07           | 0.86              | 0.12            | 12.49           | 12.85            | 0.72           | 12.87           |
| 38               | 4.25                  | 0.80             | 0.08          | 0.03            | 2.88             | 0.07           | 1.43              | 0.12            | 14.01           | 14.34            | 1.37           | 14.40           |
| 41               | 2.75                  | 0.62             | 0.04          | 0.02            | 3.31             | 0.10           | 1.83              | 0.14            | 15.49           | 15.86            | 1.78           | 15.96           |
| 44               | 2.59                  | 0.62             | 0.05          | 0.01            | 4.81             | 0.13           | 1.93              | 0.14            | 17.02           | 17.70            | 1.88           | 17.80           |
| 47               | 4.99                  | 0.63             | 0.07          | 0.01            | 7.83             | 0.14           | 1.85              | 0.13            | 18.91           | 20.49            | 1.80           | 20.57           |
| 50               | 5.09                  | 0.59             | 0.08          | 0.02            | 12.40            | 0.16           | 1.73              | 0.13            | 22.26           | 25.50            | 1.66           | 25.55           |
| 53               | 4.85                  | 0.49             | 0.09          | 0.03            | 17.86            | 0.19           | 1.64              | 0.13            | 27.49           | 32.79            | 1.54           | 32.83           |
| 56               | 2.80                  | 0.38             | 0.10          | 0.03            | 23.17            | 0.23           | 1.59              | 0.14            | 33.29           | 40.57            | 1.47           | 40.60           |
| 59               | 0.98                  | 0.29             | 0.12          | 0.03            | 27.48            | 0.29           | 1.57              | 0.16            | 38.26           | 47.12            | 1.44           | 47.14           |
| 62               | -2.68                 | 0.22             | 0.15          | 0.03            | 32.28            | 0.38           | 1.56              | 0.19            | 44.52           | 55.00            | 1.43           | 55.02           |

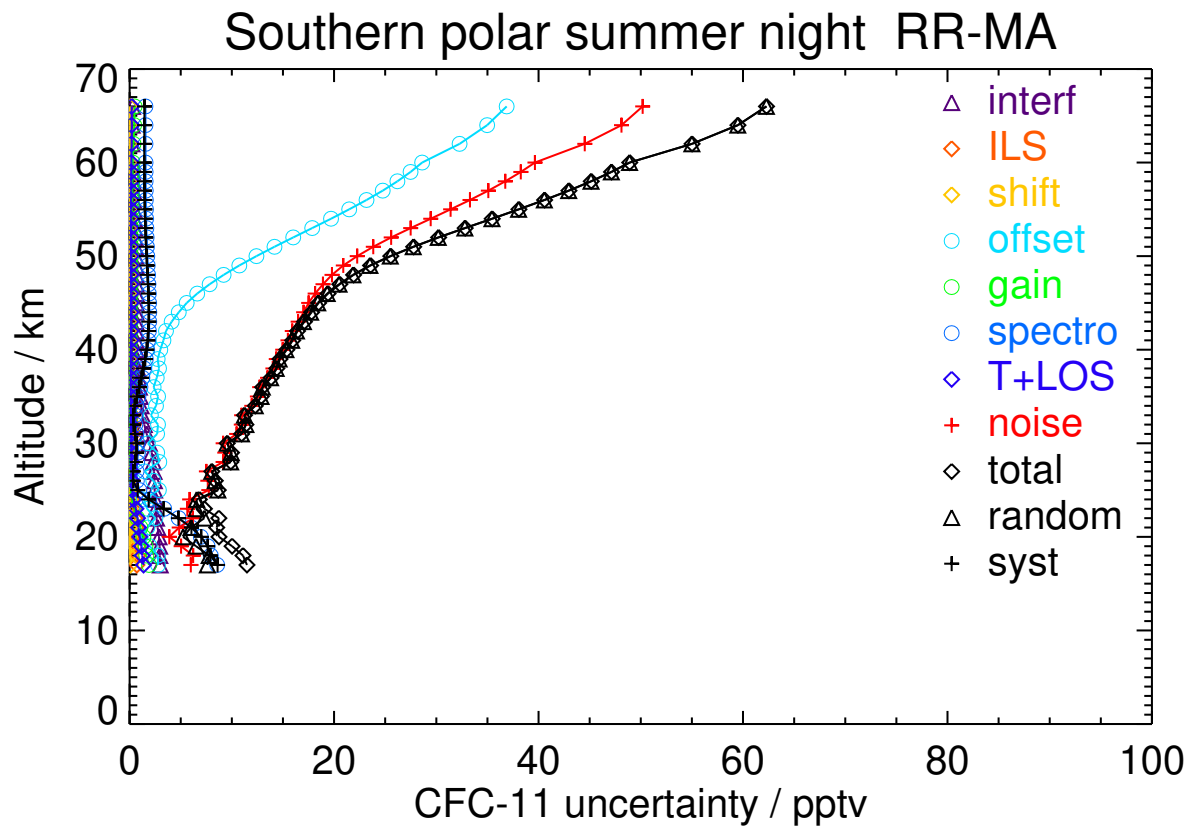

**Figure S100.** V8R\_F-11\_561 Southern polar summer night

**Table S102.** CFC-11 error budget for Southern polar autumn day. All uncertainties are  $1\sigma$ .

| altitude<br>(km) | mean target<br>(pptv) | interf<br>(pptv) | ILS<br>(pptv) | shift<br>(pptv) | offset<br>(pptv) | gain<br>(pptv) | spectro<br>(pptv) | T+LOS<br>(pptv) | noise<br>(pptv) | random<br>(pptv) | syst<br>(pptv) | total<br>(pptv) |
|------------------|-----------------------|------------------|---------------|-----------------|------------------|----------------|-------------------|-----------------|-----------------|------------------|----------------|-----------------|
| 20               | 51.90                 | 2.83             | 0.59          | 0.07            | 1.09             | 0.89           | 5.32              | 0.78            | 4.46            | 5.72             | 5.14           | 7.69            |
| 23               | 7.64                  | 2.53             | 0.22          | 0.03            | 2.33             | 0.28           | 2.69              | 0.55            | 7.16            | 8.05             | 2.45           | 8.42            |
| 26               | 6.84                  | 2.38             | 0.17          | 0.02            | 3.09             | 0.11           | 1.13              | 0.31            | 9.84            | 10.62            | 0.82           | 10.65           |
| 29               | 9.99                  | 2.07             | 0.20          | 0.05            | 3.15             | 0.14           | 1.30              | 0.27            | 11.87           | 12.48            | 1.07           | 12.53           |
| 32               | 5.18                  | 1.42             | 0.17          | 0.04            | 2.86             | 0.10           | 0.69              | 0.19            | 13.69           | 14.07            | 0.44           | 14.08           |
| 35               | 4.51                  | 0.92             | 0.10          | 0.02            | 3.02             | 0.06           | 0.98              | 0.15            | 15.57           | 15.90            | 0.78           | 15.92           |
| 38               | -1.05                 | 0.64             | 0.11          | 0.01            | 4.05             | 0.05           | 1.75              | 0.17            | 17.37           | 17.85            | 1.68           | 17.93           |
| 41               | -0.95                 | 0.52             | 0.18          | <0.01           | 6.32             | 0.07           | 2.38              | 0.20            | 19.05           | 20.09            | 2.33           | 20.22           |
| 44               | -0.92                 | 0.49             | 0.22          | <0.01           | 10.16            | 0.09           | 2.72              | 0.23            | 21.32           | 23.63            | 2.67           | 23.78           |
| 47               | -0.43                 | 0.50             | 0.23          | 0.01            | 15.26            | 0.12           | 2.87              | 0.24            | 25.15           | 29.43            | 2.81           | 29.56           |
| 50               | -2.43                 | 0.51             | 0.24          | 0.02            | 20.89            | 0.15           | 2.93              | 0.25            | 30.46           | 36.95            | 2.84           | 37.06           |
| 53               | -3.60                 | 0.51             | 0.24          | 0.02            | 26.26            | 0.18           | 2.94              | 0.26            | 36.03           | 44.59            | 2.83           | 44.68           |
| 56               | -4.22                 | 0.49             | 0.24          | 0.02            | 30.74            | 0.21           | 2.93              | 0.26            | 40.69           | 51.01            | 2.80           | 51.08           |
| 62               | -6.09                 | 0.41             | 0.25          | 0.02            | 37.44            | 0.30           | 2.88              | 0.27            | 47.69           | 60.65            | 2.73           | 60.71           |

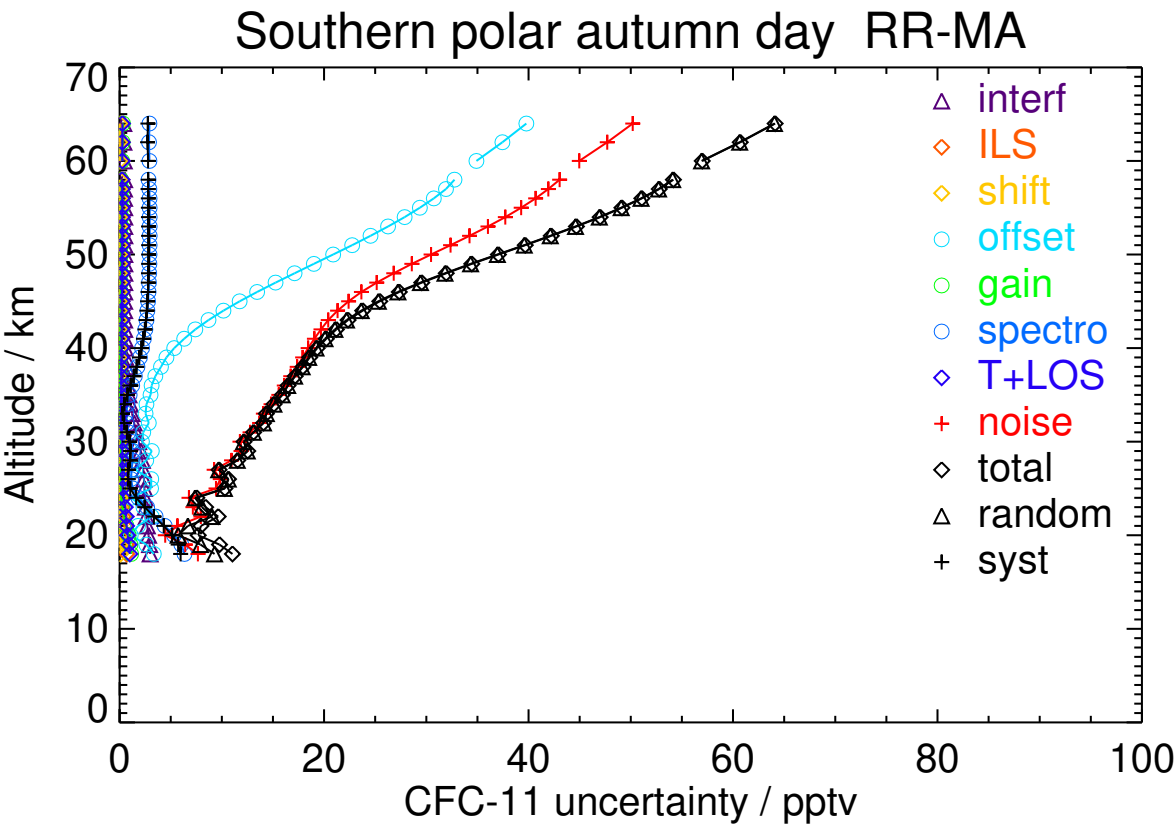

**Figure S101.** V8R\_F-11\_561 Southern polar autumn day

**Table S103.** CFC-11 error budget for Southern polar autumn night. All uncertainties are  $1\sigma$ .

| altitude<br>(km) | mean target<br>(pptv) | interf<br>(pptv) | ILS<br>(pptv) | shift<br>(pptv) | offset<br>(pptv) | gain<br>(pptv) | spectro<br>(pptv) | T+LOS<br>(pptv) | noise<br>(pptv) | random<br>(pptv) | syst<br>(pptv) | total<br>(pptv) |
|------------------|-----------------------|------------------|---------------|-----------------|------------------|----------------|-------------------|-----------------|-----------------|------------------|----------------|-----------------|
| 20               | 46.72                 | 2.80             | 0.61          | 0.06            | 1.10             | 0.81           | 4.90              | 0.69            | 4.61            | 6.05             | 4.37           | 7.47            |
| 23               | 9.24                  | 2.50             | 0.27          | 0.02            | 2.35             | 0.30           | 2.68              | 0.56            | 7.44            | 8.32             | 2.38           | 8.65            |
| 26               | 6.54                  | 2.36             | 0.16          | 0.02            | 3.03             | 0.09           | 1.37              | 0.34            | 10.05           | 10.80            | 1.10           | 10.85           |
| 29               | 5.26                  | 2.05             | 0.16          | 0.04            | 3.04             | 0.12           | 1.20              | 0.27            | 12.10           | 12.66            | 1.01           | 12.70           |
| 32               | 1.00                  | 1.41             | 0.18          | 0.04            | 2.87             | 0.09           | 0.81              | 0.18            | 13.98           | 14.36            | 0.29           | 14.37           |
| 35               | -0.29                 | 0.93             | 0.11          | 0.02            | 3.15             | 0.05           | 1.11              | 0.15            | 15.86           | 16.21            | 0.98           | 16.24           |
| 38               | 1.27                  | 0.66             | 0.14          | 0.01            | 4.32             | 0.06           | 1.84              | 0.18            | 17.66           | 18.20            | 1.80           | 18.29           |
| 41               | 1.26                  | 0.53             | 0.20          | 0.01            | 6.74             | 0.07           | 2.36              | 0.22            | 19.33           | 20.49            | 2.32           | 20.62           |
| 44               | 3.17                  | 0.50             | 0.25          | 0.01            | 10.69            | 0.10           | 2.69              | 0.25            | 21.72           | 24.22            | 2.63           | 24.36           |
| 47               | 5.73                  | 0.51             | 0.27          | 0.02            | 15.84            | 0.13           | 2.86              | 0.26            | 25.62           | 30.14            | 2.78           | 30.27           |
| 50               | 8.79                  | 0.51             | 0.28          | 0.02            | 21.47            | 0.17           | 2.93              | 0.27            | 30.94           | 37.68            | 2.82           | 37.78           |
| 53               | 11.52                 | 0.51             | 0.29          | 0.02            | 26.83            | 0.20           | 2.95              | 0.28            | 36.44           | 45.26            | 2.81           | 45.35           |
| 56               | 12.10                 | 0.49             | 0.29          | 0.02            | 31.29            | 0.23           | 2.94              | 0.28            | 41.06           | 51.64            | 2.79           | 51.72           |
| 62               | 10.93                 | 0.43             | 0.29          | 0.02            | 38.07            | 0.34           | 2.89              | 0.29            | 48.18           | 61.41            | 2.72           | 61.47           |

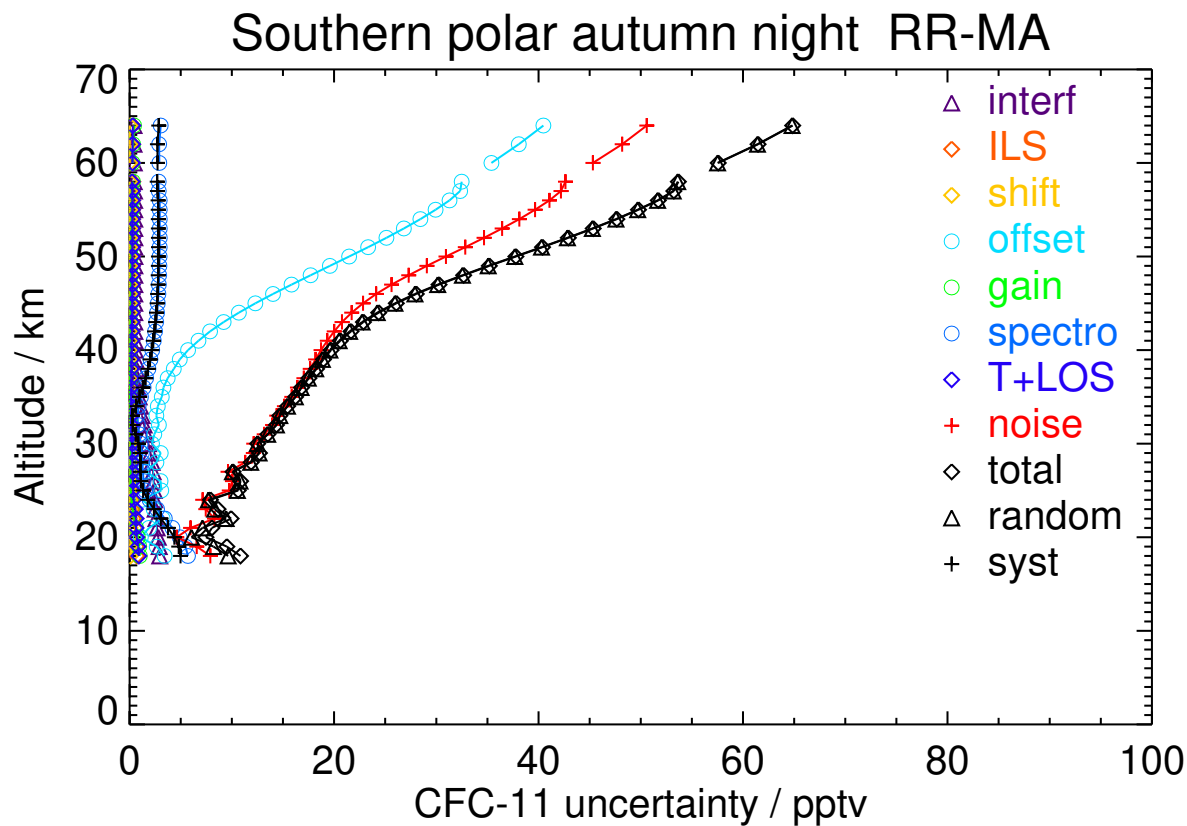

**Figure S102.** V8R\_F-11\_561 Southern polar autumn night
