# Supplementary material for: Version 8 IMK/IAA MIPAS measurements of CFC-11, CFC-12, and HCFC-22
Source: Copernicus journal article supplement (doi:10.5194/amt-2023-172), 2023-08-11
Supplement: Supplementary file 4 [file amt-2023-172-supplement.zip]

## *Supplement 2 to* **Version 8 IMK/IAA MIPAS measurements of CFC-11, CFC-12, and HCFC-22**

**Gabriele P. Stiller et al.**

*Correspondence to:* Gabriele P. Stiller (gabriele.stiller@kit.edu)

This document serves as reference for the definitions of the representative atmospheres used for the calculation of CFC-12 error budgets, as listed in Tab. S1, and as collection of the respective error budgets for FR data (2002-2004), which are listed in tables S2–S35 and depicted in figures S1–S34, and the respective error budgets for RR data (2005-2012), which are listed in tables S36–S69 and depicted in figures S35–S68.

The errors are presented as relative errors in percent, even if they are of additive nature, i.e., do not scale with the retrieved volume mixing ratio. They were calculated with respect to the average ozone profile that was calculated from the single geolocations which contribute to the respective representative atmospheres.

**Table S1.** Labels and definitions of the representative atmospheric conditions which were used to calculate the error budget for FR and RR data.

| representative atmosphere label   | month(s) used | latitude range | solar zenith angle range |
|-----------------------------------|---------------|----------------|--------------------------|
| Northern polar winter day         | Jan, Feb      | 65°N – 90°N    | < 90°                    |
| Northern polar winter night       | Jan, Feb      | 65°N – 90°N    | > 95°                    |
| Northern polar spring day         | Apr           | 65°N – 90°N    | < 90°                    |
| Northern polar spring night       | Apr           | 65°N – 90°N    | > 95°                    |
| Northern polar summer day         | Jul, Aug      | 65°N – 90°N    | < 90°                    |
| Northern polar summer night       | Jul, Aug      | 65°N – 90°N    | > 95°                    |
| Northern polar autumn day         | Oct           | 65°N – 90°N    | < 90°                    |
| Northern polar autumn night       | Oct           | 65°N – 90°N    | > 95°                    |
| Northern midlatitude winter day   | Jan, Feb      | 40°N – 60°N    | < 90°                    |
| Northern midlatitude winter night | Jan, Feb      | 40°N – 60°N    | > 95°                    |
| Northern midlatitude spring day   | Apr           | 40°N – 60°N    | < 90°                    |
| Northern midlatitude spring night | Apr           | 40°N – 60°N    | > 95°                    |
| Northern midlatitude summer day   | Jul, Aug      | 40°N – 60°N    | < 90°                    |
| Northern midlatitude summer night | Jul, Aug      | 40°N – 60°N    | > 95°                    |
| Northern midlatitude autumn day   | Oct           | 40°N – 60°N    | < 90°                    |
| Northern midlatitude autumn night | Oct           | 40°N – 60°N    | > 95°                    |
| Tropics day                       | Apr           | 20°S – 20°N    | < 90°                    |
| Tropics night                     | Apr           | 20°S – 20°N    | > 95°                    |
| Southern midlatitude winter day   | Jul, Aug      | 40°S – 60°S    | < 90°                    |
| Southern midlatitude winter night | Jul, Aug      | 40°S – 60°S    | > 95°                    |
| Southern midlatitude spring day   | Oct           | 40°S – 60°S    | < 90°                    |
| Southern midlatitude spring night | Oct           | 40°S – 60°S    | > 95°                    |
| Southern midlatitude summer day   | Jan, Feb      | 40°S – 60°S    | < 90°                    |
| Southern midlatitude summer night | Jan, Feb      | 40°S – 60°S    | > 95°                    |
| Southern midlatitude autumn day   | Apr           | 40°S – 60°S    | < 90°                    |
| Southern midlatitude autumn night | Apr           | 40°S – 60°S    | > 95°                    |
| Southern polar winter day         | Jul, Aug      | 65°S – 90°S    | < 90°                    |
| Southern polar winter night       | Jul, Aug      | 65°S – 90°S    | > 95°                    |
| Southern polar spring day         | Oct           | 65°S – 90°S    | < 90°                    |
| Southern polar spring night       | Oct           | 65°S – 90°S    | > 95°                    |
| Southern polar summer day         | Jan, Feb      | 65°S – 90°S    | < 90°                    |
| Southern polar summer night       | Jan, Feb      | 65°S – 90°S    | > 95°                    |
| Southern polar autumn day         | Apr           | 65°S – 90°S    | < 90°                    |
| Southern polar autumn night       | Apr           | 65°S – 90°S    | > 95°                    |

**Table S2.** CFC-12 error budget for Northern polar winter day. All uncertainties are  $1\sigma$ .

| altitude<br>(km) | mean target<br>(pptv) | interf<br>(pptv) | ILS<br>(pptv) | shift<br>(pptv) | offset<br>(pptv) | gain<br>(pptv) | spectro<br>(pptv) | T+LOS<br>(pptv) | noise<br>(pptv) | random<br>(pptv) | syst<br>(pptv) | total<br>(pptv) |
|------------------|-----------------------|------------------|---------------|-----------------|------------------|----------------|-------------------|-----------------|-----------------|------------------|----------------|-----------------|
| 5                | 552.43                | 34.24            | 1.81          | 0.51            | 10.34            | 6.03           | 27.47             | 8.66            | 18.77           | 42.58            | 26.23          | 50.01           |
| 8                | 541.79                | 18.86            | 3.22          | 0.50            | 8.44             | 5.48           | 26.50             | 8.57            | 16.17           | 29.58            | 25.10          | 38.79           |
| 11               | 509.59                | 6.06             | 3.52          | 0.33            | 5.90             | 7.07           | 23.39             | 7.31            | 12.49           | 18.77            | 23.20          | 29.84           |
| 14               | 430.25                | 2.16             | 7.51          | 0.89            | 4.45             | 6.21           | 32.54             | 8.12            | 10.83           | 19.05            | 31.61          | 36.91           |
| 17               | 301.20                | 1.45             | 9.82          | 1.31            | 4.17             | 4.74           | 27.60             | 6.43            | 11.34           | 16.81            | 28.10          | 32.74           |
| 20               | 168.37                | 0.90             | 5.42          | 0.64            | 4.27             | 3.07           | 19.08             | 3.59            | 13.49           | 18.54            | 16.54          | 24.85           |
| 23               | 121.17                | 0.70             | 1.27          | 0.24            | 4.62             | 1.87           | 11.17             | 1.86            | 16.90           | 19.37            | 8.11           | 21.00           |
| 26               | 93.05                 | 0.74             | 1.37          | 0.15            | 5.27             | 1.27           | 9.46              | 1.18            | 20.65           | 22.34            | 7.07           | 23.43           |
| 29               | 73.53                 | 0.87             | 1.24          | 0.10            | 9.76             | 1.02           | 7.55              | 0.94            | 25.13           | 27.54            | 5.43           | 28.07           |
| 32               | 45.99                 | 0.49             | 0.79          | 0.16            | 9.95             | 0.50           | 5.53              | 0.74            | 27.04           | 29.09            | 4.07           | 29.37           |
| 35               | 8.84                  | 0.24             | 0.53          | 0.27            | 4.85             | 0.52           | 3.52              | 0.64            | 27.95           | 28.49            | 2.52           | 28.60           |
| 38               | -2.29                 | 0.22             | 0.34          | 0.21            | 5.71             | 0.47           | 2.00              | 0.52            | 32.69           | 33.23            | 1.26           | 33.25           |
| 41               | 1.02                  | 0.24             | 0.24          | 0.19            | 9.62             | 0.45           | 1.54              | 0.46            | 36.00           | 37.29            | 1.02           | 37.30           |

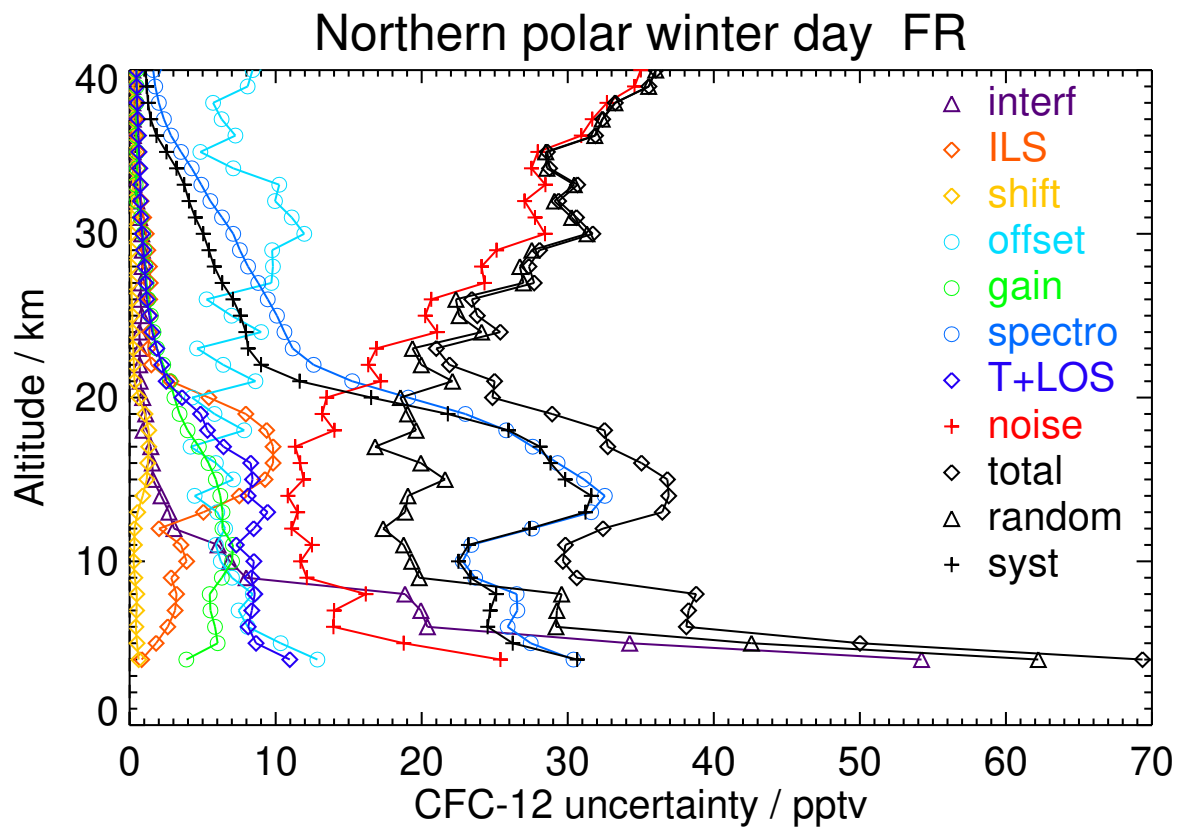

**Figure S1.** V8H\_F-12\_61 Northern polar winter day

**Table S3.** CFC-12 error budget for Northern polar winter night. All uncertainties are  $1\sigma$ .

| altitude<br>(km) | mean target<br>(pptv) | interf<br>(pptv) | ILS<br>(pptv) | shift<br>(pptv) | offset<br>(pptv) | gain<br>(pptv) | spectro<br>(pptv) | T+LOS<br>(pptv) | noise<br>(pptv) | random<br>(pptv) | syst<br>(pptv) | total<br>(pptv) |
|------------------|-----------------------|------------------|---------------|-----------------|------------------|----------------|-------------------|-----------------|-----------------|------------------|----------------|-----------------|
| 5                | 545.48                | 37.97            | 3.07          | 0.44            | 11.03            | 5.09           | 28.67             | 9.50            | 19.72           | 47.01            | 26.27          | 53.85           |
| 8                | 539.19                | 8.80             | 3.76          | 0.34            | 6.42             | 6.67           | 23.81             | 7.10            | 13.14           | 19.66            | 24.10          | 31.10           |
| 11               | 512.32                | 4.70             | 1.94          | 0.18            | 5.19             | 7.09           | 25.05             | 7.81            | 12.20           | 17.40            | 25.25          | 30.67           |
| 14               | 424.55                | 2.39             | 7.84          | 0.89            | 4.04             | 6.77           | 32.96             | 8.66            | 11.30           | 17.45            | 33.39          | 37.67           |
| 17               | 279.15                | 1.21             | 9.74          | 0.92            | 3.34             | 4.44           | 27.49             | 7.22            | 11.53           | 16.91            | 27.98          | 32.69           |
| 20               | 146.29                | 0.78             | 5.85          | 0.71            | 2.92             | 2.87           | 18.43             | 4.05            | 13.43           | 17.00            | 17.30          | 24.26           |
| 23               | 91.60                 | 0.83             | 1.72          | 0.31            | 3.44             | 1.93           | 11.25             | 1.99            | 16.86           | 19.74            | 6.66           | 20.83           |
| 26               | 80.32                 | 0.96             | 1.66          | 0.19            | 4.66             | 1.38           | 7.96              | 1.19            | 20.54           | 22.06            | 5.26           | 22.68           |
| 29               | 52.73                 | 1.26             | 1.22          | 0.15            | 9.41             | 0.73           | 6.52              | 0.97            | 24.08           | 26.38            | 4.43           | 26.75           |
| 32               | 20.22                 | 0.87             | 0.58          | 0.12            | 9.35             | 0.32           | 3.32              | 0.67            | 25.99           | 27.76            | 2.22           | 27.85           |
| 35               | -1.90                 | 0.23             | 0.39          | 0.23            | 4.29             | 0.58           | 2.23              | 0.50            | 26.11           | 26.55            | 1.13           | 26.57           |
| 38               | 1.89                  | 0.30             | 0.22          | 0.20            | 4.77             | 0.49           | 1.38              | 0.41            | 31.02           | 31.41            | 0.80           | 31.42           |
| 41               | 4.00                  | 0.33             | 0.34          | 0.18            | 7.56             | 0.40           | 1.75              | 0.33            | 34.10           | 34.97            | 1.02           | 34.98           |

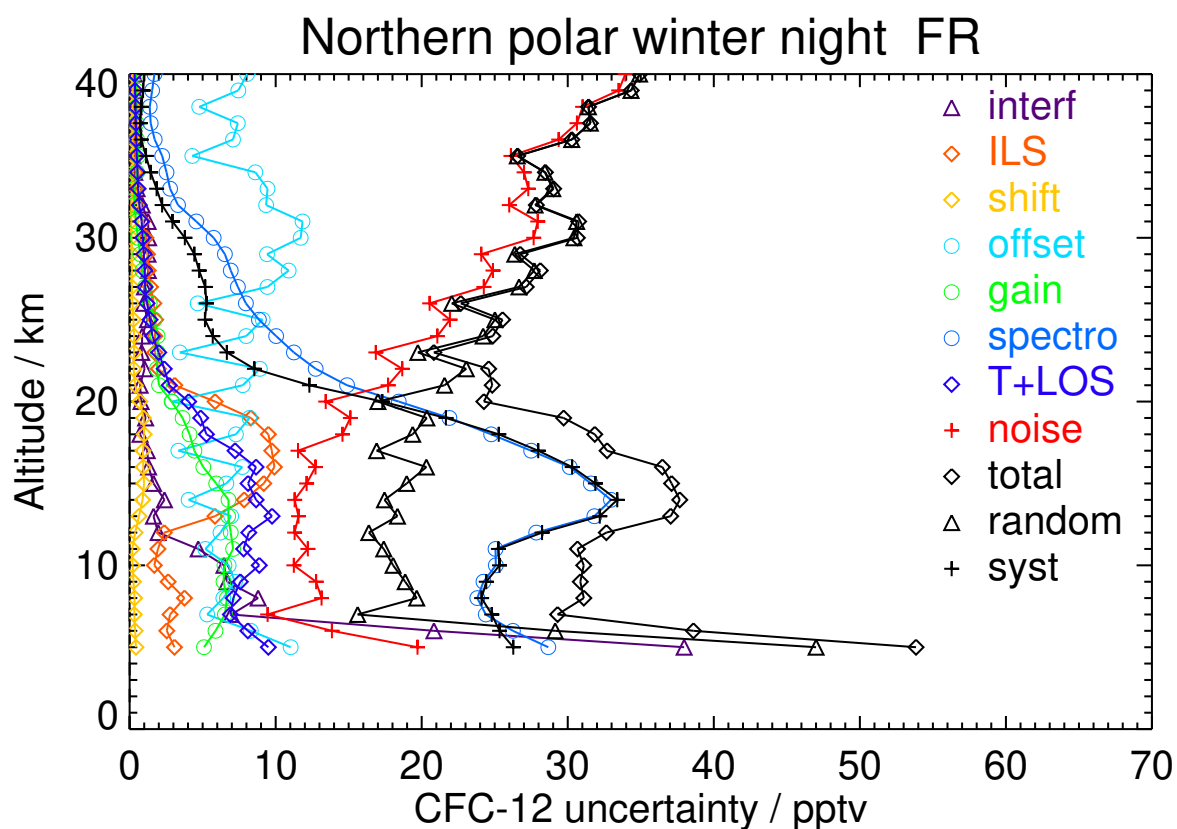**Figure S2.** V8H\_F-12\_61 Northern polar winter night

**Table S4.** CFC-12 error budget for Northern polar spring day. All uncertainties are  $1\sigma$ .

| altitude<br>(km) | mean target<br>(pptv) | interf<br>(pptv) | ILS<br>(pptv) | shift<br>(pptv) | offset<br>(pptv) | gain<br>(pptv) | spectro<br>(pptv) | T+LOS<br>(pptv) | noise<br>(pptv) | random<br>(pptv) | syst<br>(pptv) | total<br>(pptv) |
|------------------|-----------------------|------------------|---------------|-----------------|------------------|----------------|-------------------|-----------------|-----------------|------------------|----------------|-----------------|
| 8                | 534.57                | 16.05            | 1.79          | 0.46            | 7.41             | 5.16           | 24.71             | 7.74            | 11.86           | 23.68            | 24.36          | 33.97           |
| 11               | 481.95                | 6.19             | 1.70          | 0.27            | 6.77             | 6.79           | 27.41             | 7.74            | 10.07           | 16.97            | 27.53          | 32.34           |
| 14               | 370.88                | 2.42             | 8.66          | 0.70            | 6.92             | 6.54           | 33.09             | 8.12            | 9.60            | 16.82            | 33.80          | 37.76           |
| 17               | 181.60                | 0.96             | 8.72          | 1.03            | 7.59             | 3.66           | 21.34             | 5.00            | 10.80           | 17.19            | 21.23          | 27.31           |
| 20               | 142.00                | 0.88             | 3.23          | 0.51            | 8.75             | 1.88           | 10.29             | 1.94            | 13.55           | 18.03            | 7.73           | 19.62           |
| 23               | 122.73                | 0.72             | 1.74          | 0.36            | 10.00            | 2.02           | 10.51             | 1.60            | 17.02           | 20.86            | 8.68           | 22.60           |
| 26               | 95.01                 | 0.72             | 1.71          | 0.17            | 10.76            | 1.89           | 8.75              | 1.14            | 21.00           | 24.31            | 7.12           | 25.33           |
| 29               | 66.66                 | 1.03             | 1.29          | 0.15            | 12.30            | 0.88           | 6.50              | 0.95            | 24.46           | 27.74            | 5.16           | 28.22           |
| 32               | 45.87                 | 0.35             | 0.68          | 0.21            | 10.42            | 0.54           | 4.45              | 0.61            | 24.53           | 26.82            | 3.48           | 27.05           |
| 35               | 23.66                 | 0.27             | 0.49          | 0.27            | 8.66             | 0.50           | 3.06              | 0.50            | 27.01           | 28.45            | 2.32           | 28.54           |
| 38               | 8.93                  | 0.27             | 0.39          | 0.28            | 8.32             | 0.63           | 2.32              | 0.40            | 30.41           | 31.57            | 1.90           | 31.63           |
| 41               | -4.54                 | 0.23             | 0.26          | 0.22            | 8.65             | 0.56           | 1.68              | 0.36            | 32.25           | 33.42            | 1.33           | 33.45           |

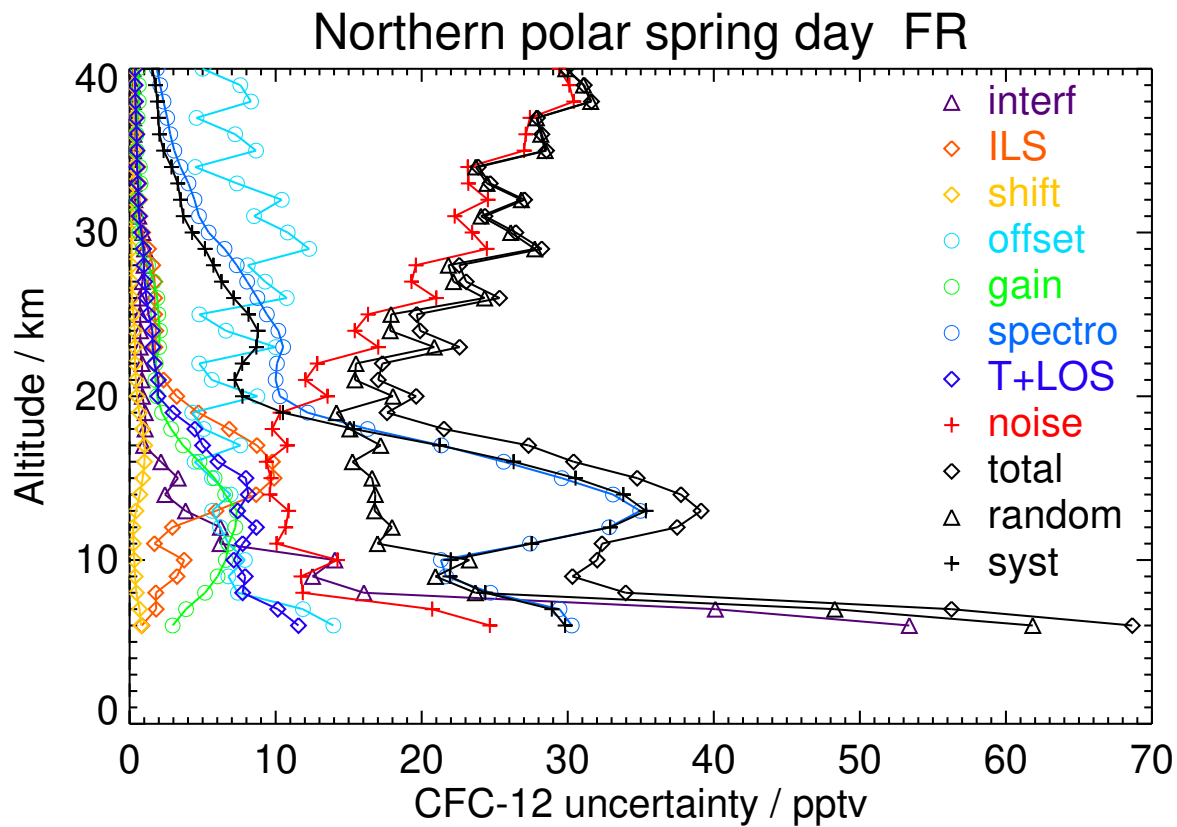

**Figure S3.** V8H\_F-12\_61 Northern polar spring day

**Table S5.** CFC-12 error budget for Northern polar spring night. All uncertainties are  $1\sigma$ .

| altitude<br>(km) | mean target<br>(pptv) | interf<br>(pptv) | ILS<br>(pptv) | shift<br>(pptv) | offset<br>(pptv) | gain<br>(pptv) | spectro<br>(pptv) | T+LOS<br>(pptv) | noise<br>(pptv) | random<br>(pptv) | syst<br>(pptv) | total<br>(pptv) |
|------------------|-----------------------|------------------|---------------|-----------------|------------------|----------------|-------------------|-----------------|-----------------|------------------|----------------|-----------------|
| 8                | 539.65                | 20.11            | 3.23          | 0.59            | 8.54             | 5.07           | 27.93             | 8.69            | 13.98           | 29.16            | 26.73          | 39.56           |
| 11               | 475.71                | 6.39             | 2.46          | 0.30            | 6.91             | 6.72           | 27.62             | 7.38            | 10.49           | 18.70            | 26.79          | 32.67           |
| 14               | 377.90                | 1.88             | 8.17          | 0.96            | 6.73             | 5.84           | 31.80             | 7.56            | 9.66            | 17.58            | 31.67          | 36.22           |
| 17               | 223.25                | 1.03             | 9.18          | 1.32            | 7.40             | 3.60           | 24.26             | 5.17            | 10.97           | 18.14            | 23.70          | 29.84           |
| 20               | 152.89                | 0.74             | 3.85          | 0.54            | 8.53             | 2.52           | 13.64             | 2.32            | 13.76           | 19.17            | 10.40          | 21.81           |
| 23               | 132.44                | 0.72             | 1.39          | 0.29            | 9.71             | 1.92           | 10.63             | 1.62            | 17.45           | 21.37            | 7.99           | 22.81           |
| 26               | 114.01                | 0.70             | 1.22          | 0.20            | 10.40            | 1.60           | 10.15             | 1.26            | 21.37           | 24.58            | 8.34           | 25.96           |
| 29               | 73.53                 | 0.95             | 1.63          | 0.15            | 12.19            | 1.11           | 8.34              | 1.09            | 25.15           | 28.45            | 6.88           | 29.27           |
| 32               | 33.24                 | 0.46             | 0.65          | 0.18            | 10.50            | 0.33           | 3.84              | 0.65            | 25.57           | 27.75            | 3.15           | 27.93           |
| 35               | 18.65                 | 0.30             | 0.34          | 0.26            | 7.95             | 0.48           | 2.30              | 0.58            | 27.45           | 28.63            | 1.64           | 28.68           |
| 38               | 9.35                  | 0.29             | 0.35          | 0.29            | 7.82             | 0.64           | 2.15              | 0.45            | 30.97           | 31.99            | 1.66           | 32.03           |
| 41               | 8.05                  | 0.23             | 0.25          | 0.25            | 8.18             | 0.56           | 1.73              | 0.40            | 32.62           | 33.65            | 1.50           | 33.68           |

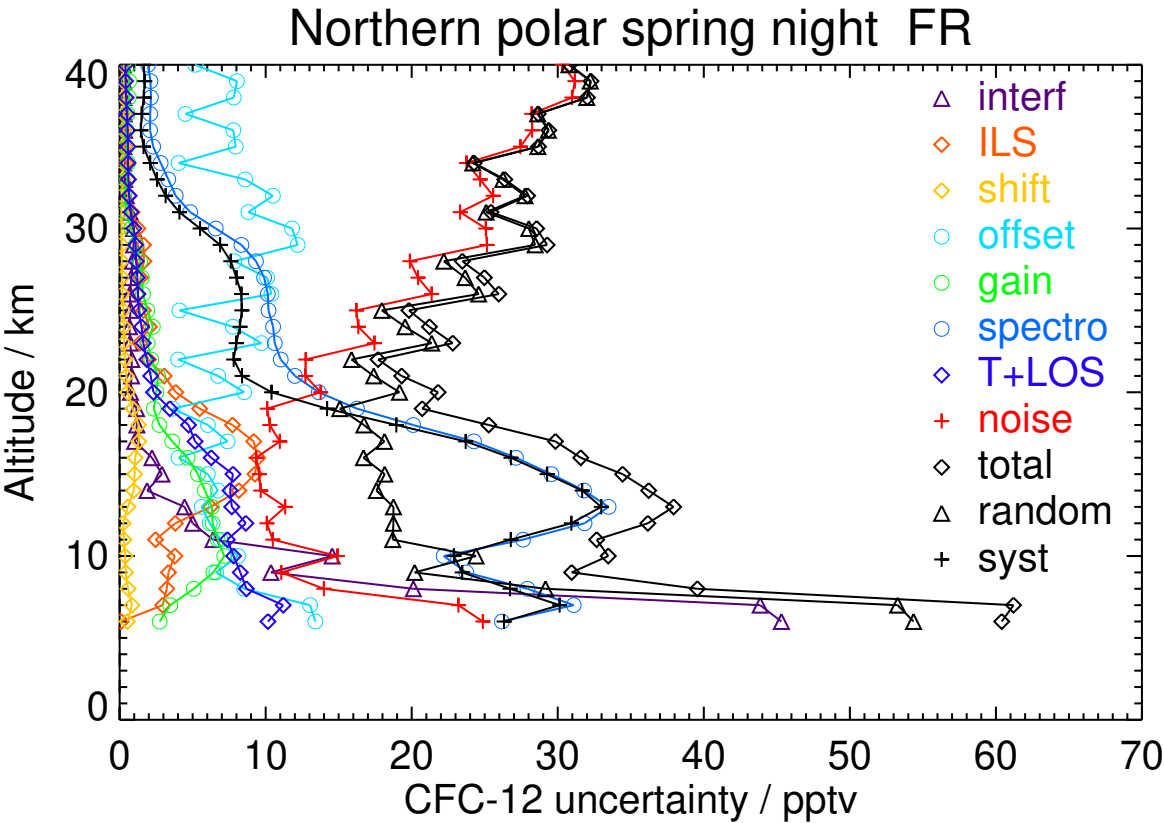

**Figure S4.** V8H\_F-12\_61 Northern polar spring night

**Table S6.** CFC-12 error budget for Northern polar summer day. All uncertainties are  $1\sigma$ .

| altitude<br>(km) | mean target<br>(pptv) | interf<br>(pptv) | ILS<br>(pptv) | shift<br>(pptv) | offset<br>(pptv) | gain<br>(pptv) | spectro<br>(pptv) | T+LOS<br>(pptv) | noise<br>(pptv) | random<br>(pptv) | syst<br>(pptv) | total<br>(pptv) |
|------------------|-----------------------|------------------|---------------|-----------------|------------------|----------------|-------------------|-----------------|-----------------|------------------|----------------|-----------------|
| 8                | 538.07                | 41.57            | 2.82          | 0.67            | 11.10            | 4.11           | 28.06             | 10.16           | 20.31           | 49.34            | 27.31          | 56.39           |
| 11               | 514.41                | 14.94            | 4.32          | 0.33            | 6.67             | 6.48           | 22.21             | 7.01            | 13.20           | 22.93            | 22.80          | 32.33           |
| 14               | 476.77                | 5.00             | 2.81          | 0.51            | 4.97             | 5.91           | 27.84             | 7.08            | 10.73           | 15.91            | 27.93          | 32.14           |
| 17               | 413.19                | 2.87             | 8.43          | 1.46            | 4.04             | 6.39           | 28.96             | 6.67            | 9.66            | 13.42            | 30.58          | 33.39           |
| 20               | 279.83                | 0.94             | 7.28          | 0.96            | 3.51             | 4.12           | 23.71             | 4.50            | 10.61           | 12.91            | 24.75          | 27.91           |
| 23               | 198.83                | 0.93             | 0.86          | 0.93            | 3.87             | 3.04           | 14.39             | 2.73            | 13.22           | 14.40            | 14.45          | 20.40           |
| 26               | 132.81                | 0.65             | 2.20          | 0.19            | 4.32             | 1.88           | 11.03             | 1.93            | 17.06           | 17.91            | 11.10          | 21.07           |
| 29               | 81.49                 | 1.00             | 1.36          | 0.10            | 7.97             | 0.77           | 7.76              | 1.31            | 20.43           | 22.12            | 7.55           | 23.38           |
| 32               | 37.43                 | 0.72             | 0.71          | 0.11            | 8.46             | 0.26           | 4.12              | 0.66            | 23.02           | 24.63            | 3.71           | 24.91           |
| 35               | 11.48                 | 0.15             | 0.31          | 0.34            | 4.07             | 0.57           | 1.95              | 0.46            | 23.00           | 23.42            | 1.39           | 23.46           |
| 38               | 6.03                  | 0.23             | 0.31          | 0.32            | 4.45             | 0.71           | 1.73              | 0.42            | 27.27           | 27.67            | 1.32           | 27.70           |
| 41               | -6.05                 | 0.19             | 0.28          | 0.19            | 4.89             | 0.66           | 1.75              | 0.36            | 28.52           | 28.96            | 1.55           | 29.00           |

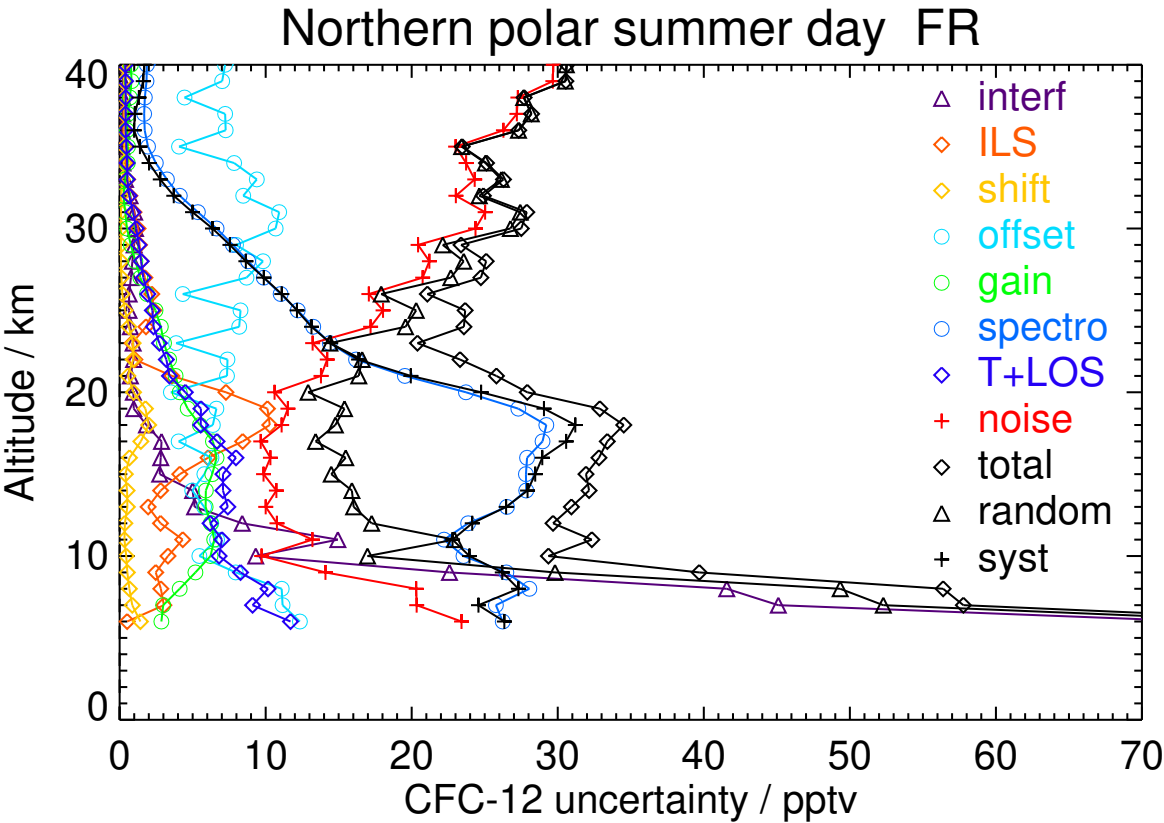

**Figure S5.** V8H\_F-12\_61 Northern polar summer day

**Table S7.** CFC-12 error budget for Northern polar summer night. All uncertainties are  $1\sigma$ .

| altitude<br>(km) | mean target<br>(pptv) | interf<br>(pptv) | ILS<br>(pptv) | shift<br>(pptv) | offset<br>(pptv) | gain<br>(pptv) | spectro<br>(pptv) | T+LOS<br>(pptv) | noise<br>(pptv) | random<br>(pptv) | syst<br>(pptv) | total<br>(pptv) |
|------------------|-----------------------|------------------|---------------|-----------------|------------------|----------------|-------------------|-----------------|-----------------|------------------|----------------|-----------------|
| 8                | 540.56                | 42.71            | 2.95          | 0.58            | 12.90            | 4.07           | 31.52             | 11.28           | 24.03           | 52.54            | 30.88          | 60.94           |
| 11               | 519.15                | 13.67            | 4.41          | 0.19            | 6.40             | 6.88           | 20.70             | 7.64            | 13.28           | 22.11            | 21.65          | 30.95           |
| 14               | 489.43                | 4.85             | 2.01          | 0.26            | 4.89             | 4.76           | 27.06             | 7.93            | 11.14           | 16.20            | 27.03          | 31.52           |
| 17               | 427.40                | 3.05             | 8.30          | 0.97            | 3.76             | 6.96           | 29.13             | 7.30            | 9.89            | 13.80            | 30.84          | 33.79           |
| 20               | 279.31                | 0.80             | 9.10          | 0.96            | 2.88             | 4.23           | 25.30             | 5.14            | 10.71           | 12.88            | 26.95          | 29.87           |
| 23               | 196.45                | 0.87             | 0.87          | 0.91            | 2.98             | 2.97           | 13.89             | 2.90            | 13.21           | 14.11            | 14.03          | 19.90           |
| 26               | 137.27                | 0.62             | 2.14          | 0.40            | 3.46             | 1.96           | 11.63             | 2.06            | 17.01           | 17.62            | 11.81          | 21.21           |
| 29               | 75.48                 | 0.86             | 1.53          | 0.12            | 7.73             | 0.74           | 8.25              | 1.46            | 20.77           | 22.29            | 8.26           | 23.77           |
| 32               | 20.63                 | 0.73             | 0.54          | 0.07            | 8.68             | 0.25           | 3.26              | 0.66            | 23.85           | 25.46            | 2.82           | 25.61           |
| 35               | 8.46                  | 0.14             | 0.28          | 0.34            | 3.44             | 0.64           | 1.76              | 0.48            | 23.40           | 23.71            | 1.21           | 23.74           |
| 38               | -1.55                 | 0.19             | 0.25          | 0.34            | 3.76             | 0.61           | 1.59              | 0.48            | 27.59           | 27.87            | 1.31           | 27.90           |
| 41               | -2.16                 | 0.20             | 0.27          | 0.18            | 4.53             | 0.73           | 1.52              | 0.46            | 29.28           | 29.65            | 1.41           | 29.68           |

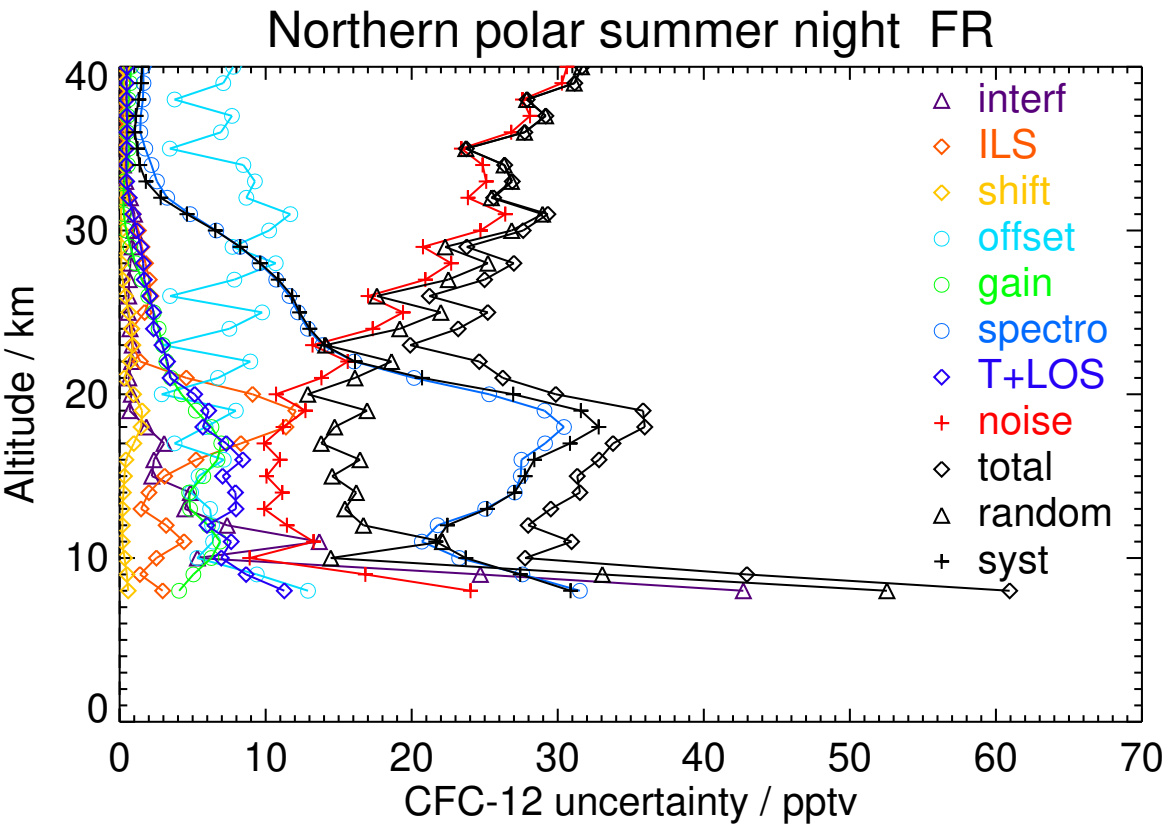

**Figure S6.** V8H\_F-12\_61 Northern polar summer night



**Table S8.** CFC-12 error budget for Northern polar autumn day. All uncertainties are  $1\sigma$ .

| altitude<br>(km) | mean target<br>(pptv) | interf<br>(pptv) | ILS<br>(pptv) | shift<br>(pptv) | offset<br>(pptv) | gain<br>(pptv) | spectro<br>(pptv) | T+LOS<br>(pptv) | noise<br>(pptv) | random<br>(pptv) | syst<br>(pptv) | total<br>(pptv) |
|------------------|-----------------------|------------------|---------------|-----------------|------------------|----------------|-------------------|-----------------|-----------------|------------------|----------------|-----------------|
| 8                | 541.16                | 10.00            | 3.10          | 0.42            | 5.57             | 5.19           | 24.02             | 6.46            | 9.31            | 17.02            | 24.16          | 29.55           |
| 11               | 530.26                | 6.13             | 2.70          | 0.25            | 6.50             | 6.27           | 24.92             | 7.43            | 9.87            | 16.20            | 25.26          | 30.01           |
| 14               | 482.27                | 1.74             | 2.86          | 0.51            | 6.74             | 7.22           | 28.03             | 7.87            | 10.13           | 15.82            | 28.44          | 32.55           |
| 17               | 393.15                | 1.46             | 6.90          | 1.31            | 7.29             | 6.59           | 29.68             | 7.83            | 11.14           | 16.85            | 30.50          | 34.85           |
| 20               | 269.14                | 0.54             | 8.03          | 0.89            | 7.85             | 4.08           | 23.37             | 4.68            | 13.42           | 17.36            | 24.31          | 29.87           |
| 23               | 183.60                | 0.63             | 1.88          | 0.24            | 8.97             | 2.46           | 16.64             | 2.91            | 17.52           | 20.20            | 16.58          | 26.13           |
| 26               | 95.93                 | 0.60             | 1.62          | 0.16            | 9.81             | 1.46           | 11.86             | 1.82            | 22.09           | 24.53            | 11.47          | 27.08           |
| 29               | 37.52                 | 0.62             | 1.05          | 0.08            | 11.83            | 0.60           | 6.30              | 1.03            | 26.63           | 29.35            | 5.50           | 29.86           |
| 32               | 10.12                 | 0.58             | 0.51          | 0.12            | 10.84            | 0.24           | 2.89              | 0.64            | 29.45           | 31.49            | 1.57           | 31.53           |
| 35               | 11.00                 | 0.30             | 0.38          | 0.18            | 7.73             | 0.26           | 1.89              | 0.64            | 31.72           | 32.71            | 0.70           | 32.72           |
| 38               | 7.21                  | 0.38             | 0.26          | 0.19            | 7.75             | 0.25           | 1.43              | 0.56            | 36.27           | 37.12            | 0.88           | 37.13           |
| 41               | 3.43                  | 0.68             | 0.31          | 0.19            | 11.01            | 0.29           | 1.54              | 0.58            | 39.51           | 41.05            | 0.93           | 41.06           |

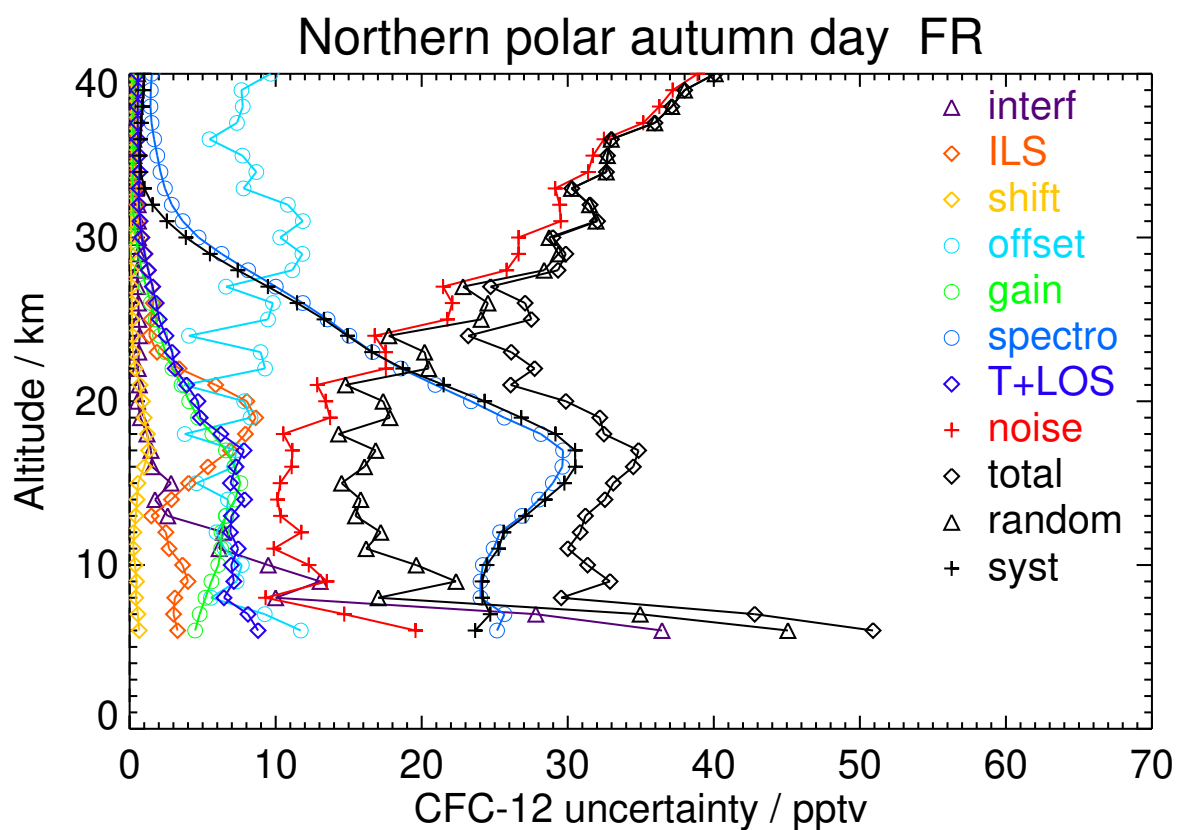**Figure S7.** V8H\_F-12\_61 Northern polar autumn day

**Table S9.** CFC-12 error budget for Northern polar autumn night. All uncertainties are  $1\sigma$ .

| altitude<br>(km) | mean target<br>(pptv) | interf<br>(pptv) | ILS<br>(pptv) | shift<br>(pptv) | offset<br>(pptv) | gain<br>(pptv) | spectro<br>(pptv) | T+LOS<br>(pptv) | noise<br>(pptv) | random<br>(pptv) | syst<br>(pptv) | total<br>(pptv) |
|------------------|-----------------------|------------------|---------------|-----------------|------------------|----------------|-------------------|-----------------|-----------------|------------------|----------------|-----------------|
| 8                | 541.64                | 10.56            | 2.53          | 0.44            | 6.17             | 5.81           | 24.97             | 7.08            | 10.10           | 18.04            | 25.30          | 31.07           |
| 11               | 525.82                | 4.39             | 2.37          | 0.23            | 6.59             | 6.14           | 25.03             | 7.39            | 9.79            | 15.37            | 25.43          | 29.72           |
| 14               | 470.23                | 1.59             | 3.24          | 0.50            | 7.18             | 7.60           | 28.25             | 7.96            | 10.30           | 15.72            | 29.04          | 33.02           |
| 17               | 357.10                | 1.10             | 8.07          | 1.14            | 7.80             | 6.56           | 29.13             | 7.83            | 11.62           | 17.26            | 30.31          | 34.88           |
| 20               | 232.65                | 0.59             | 7.18          | 0.59            | 8.75             | 3.63           | 20.86             | 4.15            | 14.41           | 18.12            | 21.76          | 28.32           |
| 23               | 153.58                | 0.57             | 2.02          | 0.19            | 9.97             | 2.16           | 15.14             | 2.60            | 18.60           | 21.44            | 15.20          | 26.28           |
| 26               | 66.93                 | 0.52             | 1.45          | 0.11            | 10.80            | 1.02           | 9.13              | 1.52            | 23.01           | 25.65            | 8.78           | 27.11           |
| 29               | 29.59                 | 0.52             | 0.88          | 0.06            | 12.50            | 0.50           | 4.86              | 0.83            | 27.34           | 30.24            | 3.89           | 30.49           |
| 32               | 8.42                  | 0.31             | 0.55          | 0.13            | 11.04            | 0.31           | 2.90              | 0.66            | 29.32           | 31.44            | 1.58           | 31.48           |
| 35               | 1.21                  | 0.24             | 0.36          | 0.18            | 8.18             | 0.26           | 1.69              | 0.58            | 31.56           | 32.64            | 0.92           | 32.65           |
| 38               | -0.69                 | 0.28             | 0.38          | 0.20            | 7.75             | 0.33           | 1.62              | 0.60            | 35.84           | 36.71            | 0.88           | 36.72           |
| 41               | 3.01                  | 0.39             | 0.45          | 0.20            | 10.59            | 0.45           | 1.68              | 0.55            | 38.91           | 40.36            | 0.99           | 40.37           |

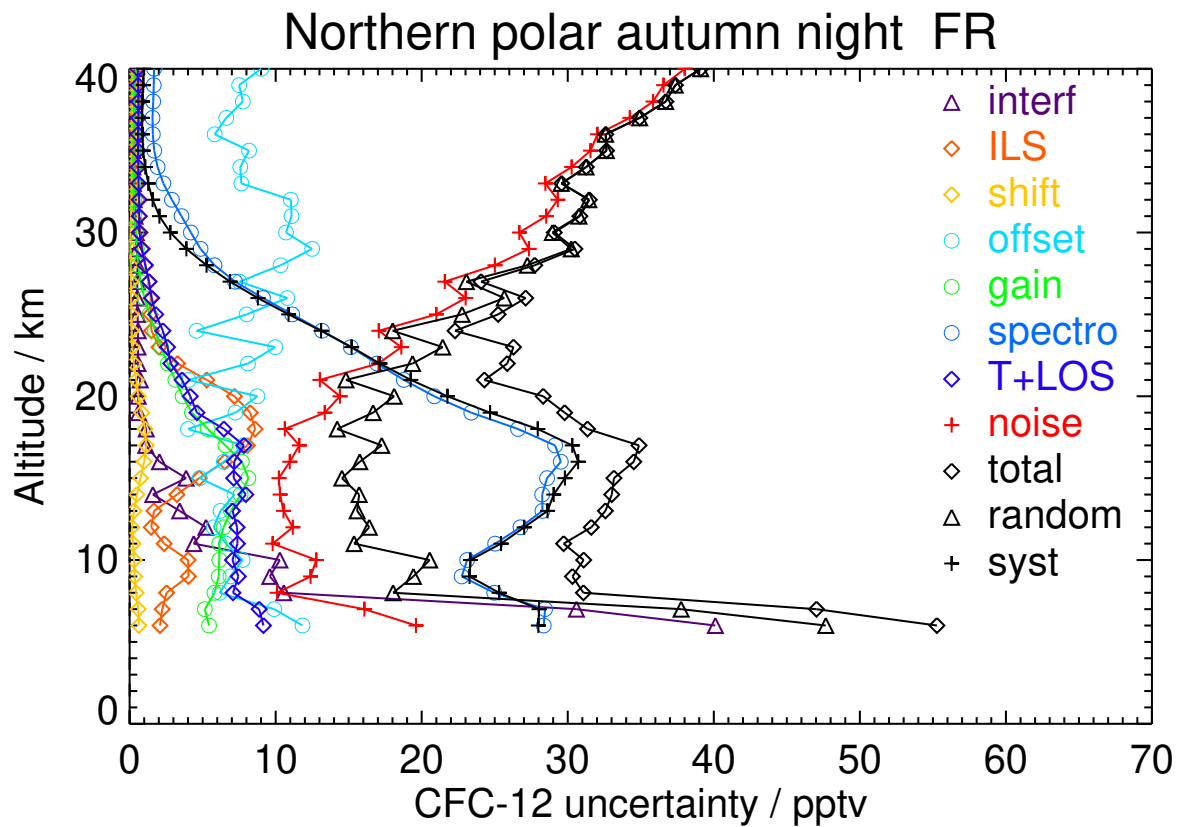

**Figure S8.** V8H\_F-12\_61 Northern polar autumn night

**Table S10.** CFC-12 error budget for Northern midlatitude winter day. All uncertainties are  $1\sigma$ .

| altitude<br>(km) | mean target<br>(pptv) | interf<br>(pptv) | ILS<br>(pptv) | shift<br>(pptv) | offset<br>(pptv) | gain<br>(pptv) | spectro<br>(pptv) | T+LOS<br>(pptv) | noise<br>(pptv) | random<br>(pptv) | syst<br>(pptv) | total<br>(pptv) |
|------------------|-----------------------|------------------|---------------|-----------------|------------------|----------------|-------------------|-----------------|-----------------|------------------|----------------|-----------------|
| 5                | 551.58                | 28.60            | 3.32          | 0.35            | 10.83            | 5.38           | 24.03             | 9.02            | 18.82           | 38.08            | 23.20          | 44.59           |
| 8                | 545.70                | 15.38            | 2.81          | 0.45            | 7.19             | 5.55           | 24.93             | 7.31            | 14.47           | 24.42            | 24.81          | 34.81           |
| 11               | 512.81                | 5.60             | 3.03          | 0.19            | 5.56             | 6.34           | 23.47             | 7.38            | 12.52           | 17.68            | 23.68          | 29.56           |
| 14               | 449.92                | 2.00             | 4.15          | 0.43            | 3.87             | 6.45           | 29.01             | 7.51            | 10.97           | 15.63            | 29.19          | 33.11           |
| 17               | 376.25                | 1.34             | 7.65          | 1.35            | 3.28             | 5.46           | 26.81             | 6.18            | 10.87           | 14.62            | 27.64          | 31.27           |
| 20               | 269.59                | 0.78             | 6.27          | 0.85            | 3.30             | 3.63           | 23.10             | 4.13            | 12.76           | 15.81            | 22.98          | 27.89           |
| 23               | 201.61                | 0.67             | 1.00          | 0.48            | 3.73             | 2.61           | 14.73             | 2.50            | 16.09           | 17.61            | 13.94          | 22.46           |
| 26               | 156.70                | 0.66             | 1.96          | 0.27            | 4.24             | 1.94           | 12.41             | 1.83            | 19.86           | 20.76            | 12.11          | 24.04           |
| 29               | 105.96                | 0.87             | 1.87          | 0.14            | 9.18             | 1.31           | 10.19             | 1.41            | 24.16           | 26.24            | 9.56           | 27.93           |
| 32               | 44.54                 | 0.57             | 1.00          | 0.14            | 9.55             | 0.53           | 5.87              | 0.78            | 26.26           | 28.17            | 4.90           | 28.60           |
| 35               | 17.77                 | 0.26             | 0.47          | 0.23            | 4.27             | 0.56           | 2.80              | 0.55            | 26.57           | 27.00            | 2.00           | 27.07           |
| 38               | 6.96                  | 0.28             | 0.25          | 0.22            | 5.02             | 0.62           | 1.86              | 0.52            | 31.24           | 31.67            | 1.50           | 31.71           |
| 41               | -2.12                 | 0.32             | 0.28          | 0.20            | 7.35             | 0.59           | 1.81              | 0.39            | 33.81           | 34.64            | 1.26           | 34.66           |

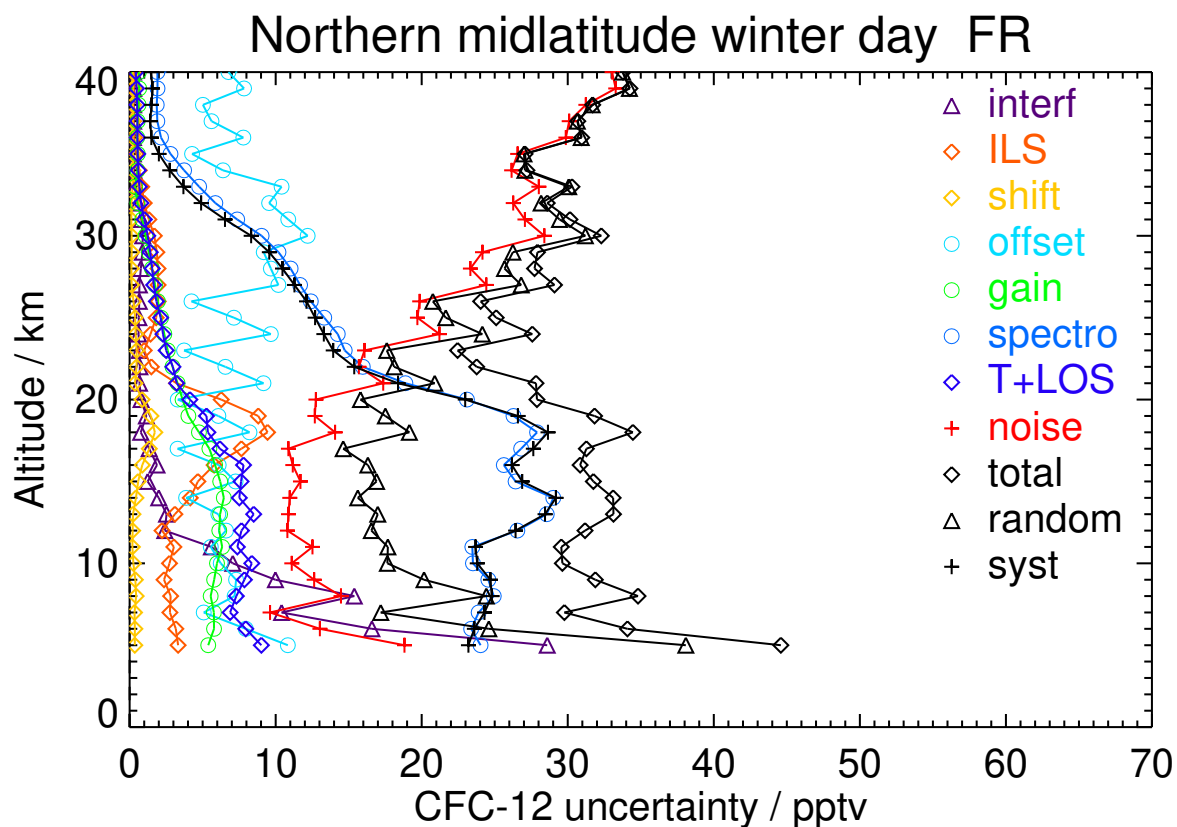**Figure S9.** V8H\_F-12\_61 Northern midlatitude winter day

**Table S11.** CFC-12 error budget for Northern midlatitude winter night. All uncertainties are  $1\sigma$ .

| altitude<br>(km) | mean target<br>(pptv) | interf<br>(pptv) | ILS<br>(pptv) | shift<br>(pptv) | offset<br>(pptv) | gain<br>(pptv) | spectro<br>(pptv) | T+LOS<br>(pptv) | noise<br>(pptv) | random<br>(pptv) | syst<br>(pptv) | total<br>(pptv) |
|------------------|-----------------------|------------------|---------------|-----------------|------------------|----------------|-------------------|-----------------|-----------------|------------------|----------------|-----------------|
| 5                | 554.44                | 18.33            | 4.83          | 0.47            | 11.06            | 5.32           | 24.29             | 9.44            | 18.75           | 30.62            | 24.56          | 39.26           |
| 8                | 544.58                | 11.33            | 1.79          | 0.51            | 4.57             | 5.96           | 31.21             | 6.26            | 11.02           | 22.82            | 28.33          | 36.38           |
| 11               | 517.18                | 3.11             | 2.66          | 0.57            | 5.26             | 6.78           | 32.84             | 8.31            | 11.19           | 25.15            | 27.03          | 36.92           |
| 14               | 425.75                | 1.45             | 5.32          | 0.56            | 4.47             | 5.82           | 31.51             | 8.17            | 10.63           | 20.80            | 28.71          | 35.45           |
| 17               | 360.78                | 1.38             | 5.87          | 1.19            | 3.72             | 5.13           | 25.73             | 6.55            | 10.11           | 18.15            | 23.57          | 29.75           |
| 20               | 269.05                | 0.73             | 7.05          | 1.22            | 3.25             | 3.47           | 20.68             | 4.19            | 11.36           | 13.99            | 21.28          | 25.47           |
| 23               | 207.76                | 0.75             | 1.39          | 0.48            | 3.47             | 2.60           | 16.86             | 2.49            | 14.35           | 18.36            | 13.44          | 22.75           |
| 26               | 169.46                | 0.63             | 1.80          | 0.21            | 4.25             | 2.10           | 12.88             | 1.73            | 18.62           | 20.30            | 11.39          | 23.28           |
| 29               | 136.50                | 0.76             | 1.82          | 0.09            | 9.03             | 1.66           | 11.68             | 1.43            | 23.09           | 25.38            | 10.77          | 27.57           |
| 32               | 66.74                 | 0.62             | 1.42          | 0.13            | 10.38            | 0.87           | 8.53              | 1.09            | 27.25           | 29.57            | 7.26           | 30.45           |
| 35               | 17.83                 | 0.34             | 0.72          | 0.26            | 4.48             | 0.51           | 4.03              | 0.61            | 26.51           | 27.05            | 3.02           | 27.21           |
| 38               | 1.96                  | 0.37             | 0.29          | 0.22            | 4.72             | 0.48           | 1.79              | 0.51            | 30.97           | 31.36            | 1.28           | 31.39           |
| 41               | -6.63                 | 0.27             | 0.24          | 0.20            | 6.55             | 0.47           | 1.58              | 0.43            | 33.58           | 34.24            | 1.04           | 34.26           |

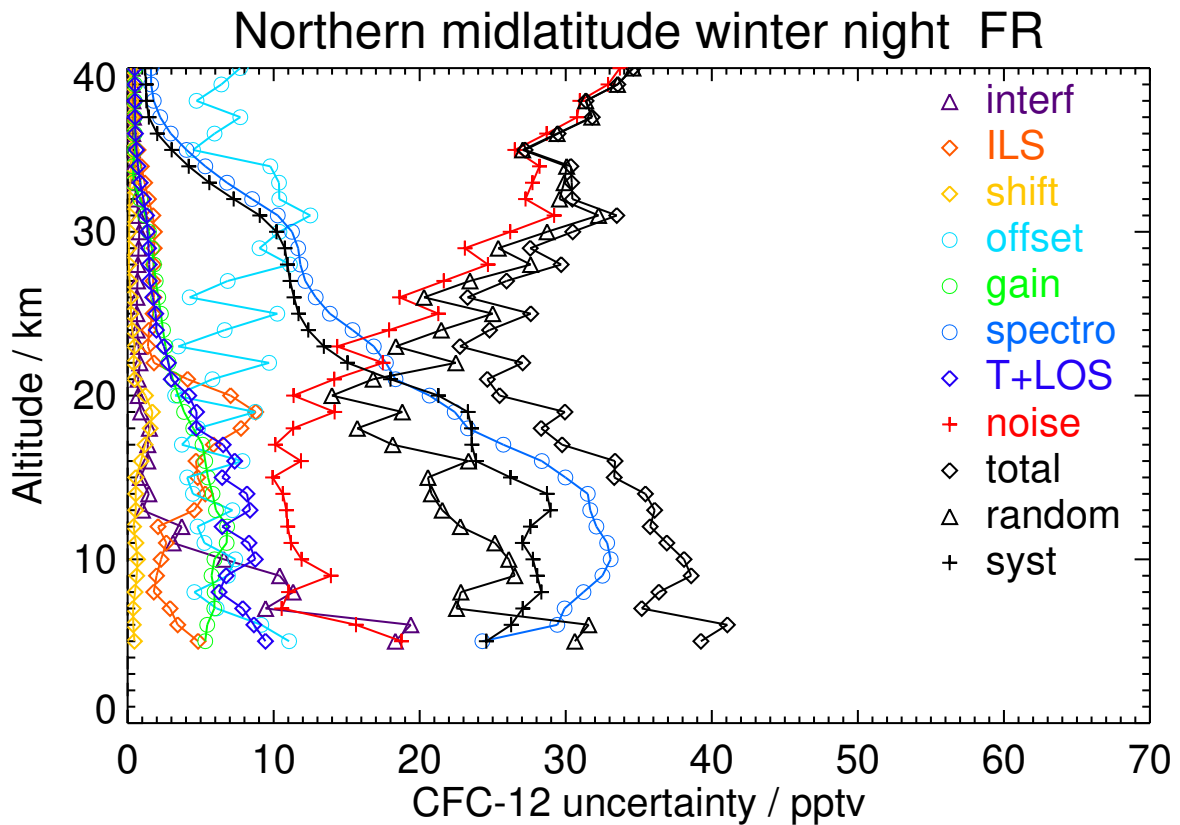**Figure S10.** V8H\_F-12\_61 Northern midlatitude winter night

**Table S12.** CFC-12 error budget for Northern midlatitude spring day. All uncertainties are  $1\sigma$ .

| altitude<br>(km) | mean target<br>(pptv) | interf<br>(pptv) | ILS<br>(pptv) | shift<br>(pptv) | offset<br>(pptv) | gain<br>(pptv) | spectro<br>(pptv) | T+LOS<br>(pptv) | noise<br>(pptv) | random<br>(pptv) | syst<br>(pptv) | total<br>(pptv) |
|------------------|-----------------------|------------------|---------------|-----------------|------------------|----------------|-------------------|-----------------|-----------------|------------------|----------------|-----------------|
| 8                | 543.02                | 16.50            | 2.89          | 0.47            | 7.49             | 5.55           | 24.33             | 7.27            | 11.24           | 23.51            | 24.22          | 33.75           |
| 11               | 498.67                | 6.57             | 2.31          | 0.38            | 7.55             | 6.26           | 25.52             | 7.26            | 10.89           | 17.44            | 25.76          | 31.10           |
| 14               | 451.95                | 1.72             | 3.22          | 0.38            | 7.59             | 5.96           | 25.12             | 7.33            | 10.52           | 16.52            | 25.08          | 30.03           |
| 17               | 386.04                | 1.05             | 9.89          | 1.71            | 8.50             | 5.60           | 32.58             | 6.74            | 12.20           | 18.33            | 33.55          | 38.23           |
| 20               | 256.04                | 0.65             | 6.01          | 0.58            | 9.56             | 3.50           | 22.94             | 4.01            | 14.89           | 20.03            | 22.43          | 30.07           |
| 23               | 192.23                | 0.61             | 1.21          | 0.40            | 10.57            | 2.53           | 14.89             | 2.56            | 18.57           | 22.65            | 13.43          | 26.33           |
| 26               | 141.61                | 0.62             | 1.78          | 0.16            | 11.16            | 1.86           | 12.34             | 1.87            | 22.17           | 25.44            | 11.48          | 27.91           |
| 29               | 96.40                 | 0.94             | 1.56          | 0.22            | 12.35            | 1.17           | 8.74              | 1.50            | 25.65           | 28.75            | 8.21           | 29.90           |
| 32               | 51.34                 | 0.42             | 1.07          | 0.26            | 10.35            | 0.44           | 5.55              | 0.69            | 25.92           | 28.05            | 5.00           | 28.49           |
| 35               | 17.13                 | 0.48             | 0.50          | 0.26            | 8.57             | 0.49           | 2.98              | 0.51            | 28.00           | 29.38            | 2.01           | 29.45           |
| 38               | 9.51                  | 0.48             | 0.41          | 0.31            | 8.74             | 0.81           | 2.27              | 0.46            | 30.97           | 32.23            | 1.71           | 32.28           |
| 41               | 5.64                  | 0.27             | 0.36          | 0.21            | 9.55             | 0.67           | 1.89              | 0.35            | 32.46           | 33.87            | 1.40           | 33.90           |

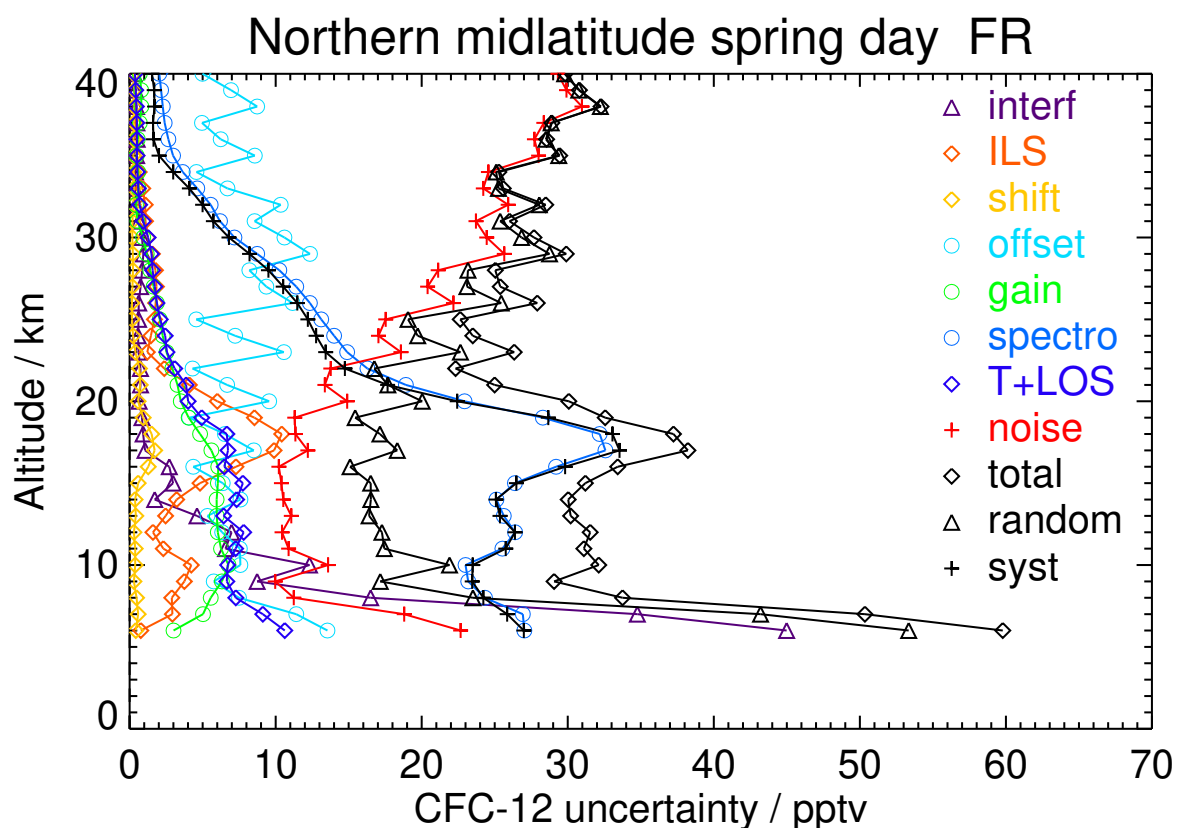**Figure S11.** V8H\_F-12\_61 Northern midlatitude spring day

**Table S13.** CFC-12 error budget for Northern midlatitude spring night. All uncertainties are  $1\sigma$ .

| altitude<br>(km) | mean target<br>(pptv) | interf<br>(pptv) | ILS<br>(pptv) | shift<br>(pptv) | offset<br>(pptv) | gain<br>(pptv) | spectro<br>(pptv) | T+LOS<br>(pptv) | noise<br>(pptv) | random<br>(pptv) | syst<br>(pptv) | total<br>(pptv) |
|------------------|-----------------------|------------------|---------------|-----------------|------------------|----------------|-------------------|-----------------|-----------------|------------------|----------------|-----------------|
| 8                | 536.36                | 22.41            | 2.99          | 0.68            | 8.62             | 5.86           | 26.87             | 8.02            | 13.83           | 30.02            | 26.39          | 39.97           |
| 11               | 490.23                | 6.80             | 3.12          | 0.46            | 6.89             | 6.57           | 24.96             | 6.31            | 10.73           | 17.50            | 24.86          | 30.41           |
| 14               | 435.02                | 1.96             | 3.98          | 0.47            | 6.50             | 5.79           | 26.02             | 6.81            | 9.90            | 16.76            | 25.23          | 30.29           |
| 17               | 353.17                | 1.20             | 9.52          | 1.52            | 7.19             | 5.29           | 30.22             | 5.93            | 11.18           | 17.18            | 30.86          | 35.32           |
| 20               | 234.52                | 0.64             | 4.72          | 0.99            | 8.33             | 3.26           | 18.80             | 3.35            | 13.80           | 18.55            | 17.74          | 25.67           |
| 23               | 199.13                | 0.65             | 1.26          | 0.49            | 9.45             | 2.42           | 14.17             | 2.42            | 17.37           | 21.46            | 12.06          | 24.62           |
| 26               | 155.90                | 0.65             | 1.78          | 0.13            | 10.16            | 1.73           | 12.36             | 1.91            | 21.12           | 23.77            | 12.15          | 26.69           |
| 29               | 100.58                | 0.83             | 1.67          | 0.16            | 11.96            | 1.20           | 9.08              | 1.42            | 24.68           | 27.65            | 8.77           | 29.00           |
| 32               | 68.79                 | 0.47             | 1.09          | 0.19            | 10.08            | 0.43           | 6.49              | 0.88            | 25.43           | 27.58            | 5.67           | 28.16           |
| 35               | 21.67                 | 0.39             | 0.46          | 0.29            | 7.78             | 0.53           | 3.36              | 0.58            | 27.20           | 28.37            | 2.75           | 28.51           |
| 38               | 11.08                 | 0.34             | 0.39          | 0.34            | 8.01             | 0.79           | 2.40              | 0.48            | 30.50           | 31.59            | 1.99           | 31.65           |
| 41               | 1.43                  | 0.20             | 0.25          | 0.20            | 8.51             | 0.62           | 1.72              | 0.39            | 31.40           | 32.56            | 1.38           | 32.59           |

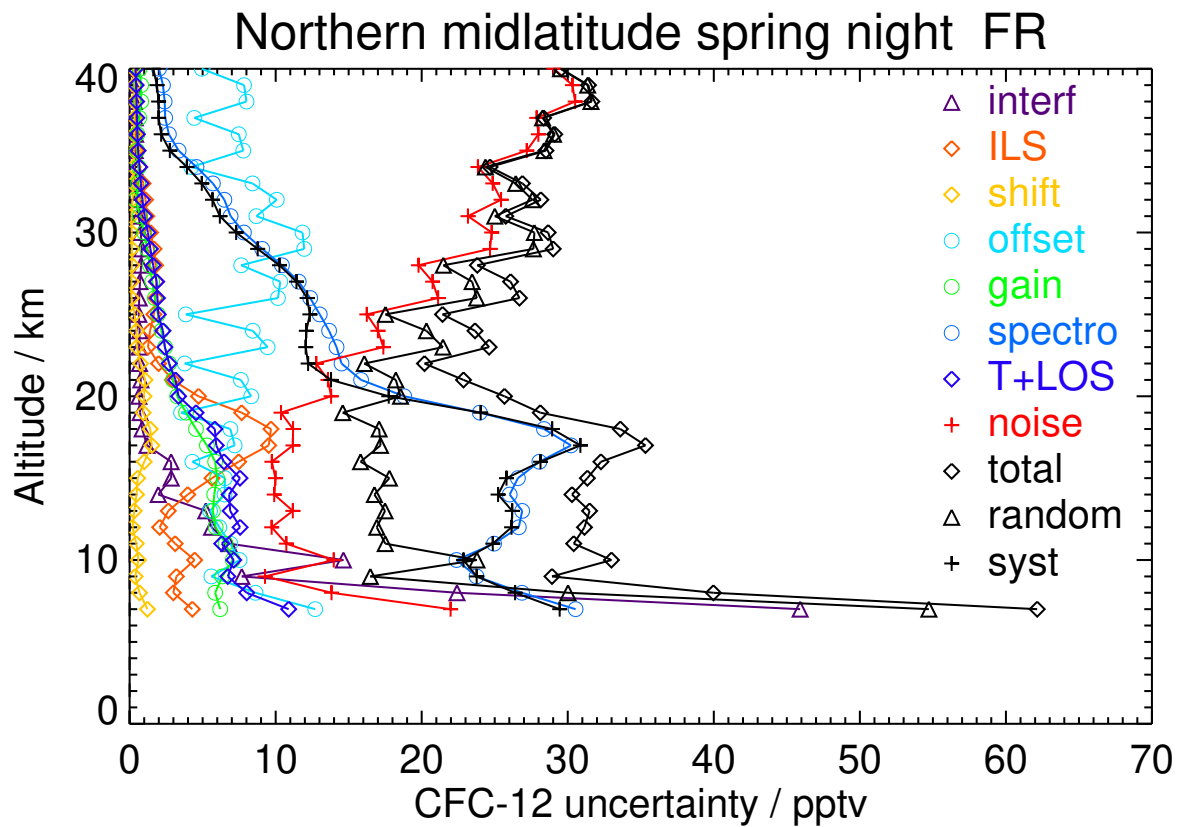**Figure S12.** V8H\_F-12\_61 Northern midlatitude spring night

**Table S14.** CFC-12 error budget for Northern midlatitude summer day. All uncertainties are  $1\sigma$ .

| altitude<br>(km) | mean target<br>(pptv) | interf<br>(pptv) | ILS<br>(pptv) | shift<br>(pptv) | offset<br>(pptv) | gain<br>(pptv) | spectro<br>(pptv) | T+LOS<br>(pptv) | noise<br>(pptv) | random<br>(pptv) | syst<br>(pptv) | total<br>(pptv) |
|------------------|-----------------------|------------------|---------------|-----------------|------------------|----------------|-------------------|-----------------|-----------------|------------------|----------------|-----------------|
| 8                | 538.83                | 30.24            | 6.00          | 0.46            | 10.26            | 8.13           | 23.10             | 8.33            | 18.32           | 38.66            | 23.78          | 45.39           |
| 11               | 524.95                | 10.92            | 8.14          | 0.35            | 6.30             | 4.75           | 23.94             | 7.09            | 12.21           | 19.99            | 24.91          | 31.94           |
| 14               | 527.05                | 4.92             | 3.06          | 0.39            | 4.72             | 7.70           | 25.40             | 7.31            | 11.09           | 16.90            | 25.52          | 30.61           |
| 17               | 489.65                | 2.61             | 9.63          | 1.49            | 3.78             | 6.86           | 35.67             | 7.83            | 11.20           | 15.62            | 37.13          | 40.28           |
| 20               | 358.02                | 1.08             | 9.96          | 0.67            | 3.10             | 4.15           | 33.21             | 6.10            | 12.03           | 15.17            | 34.39          | 37.59           |
| 23               | 237.53                | 0.73             | 0.90          | 1.21            | 3.29             | 3.43           | 17.73             | 3.81            | 14.25           | 15.51            | 17.79          | 23.61           |
| 26               | 173.28                | 0.67             | 2.77          | 0.77            | 3.72             | 2.40           | 13.82             | 2.49            | 17.56           | 18.44            | 13.92          | 23.10           |
| 29               | 102.37                | 1.04             | 1.82          | 0.27            | 7.62             | 1.11           | 10.10             | 1.81            | 20.88           | 22.45            | 10.03          | 24.59           |
| 32               | 46.85                 | 0.71             | 0.70          | 0.10            | 7.96             | 0.36           | 4.56              | 0.78            | 23.03           | 24.46            | 4.21           | 24.82           |
| 35               | 22.34                 | 0.23             | 0.35          | 0.36            | 3.82             | 0.75           | 2.75              | 0.51            | 23.59           | 23.96            | 2.38           | 24.08           |
| 38               | -7.27                 | 0.28             | 0.25          | 0.32            | 4.44             | 0.75           | 2.04              | 0.45            | 27.57           | 27.97            | 1.67           | 28.02           |
| 41               | 1.48                  | 0.16             | 0.22          | 0.16            | 5.11             | 0.80           | 1.67              | 0.38            | 28.75           | 29.23            | 1.47           | 29.26           |

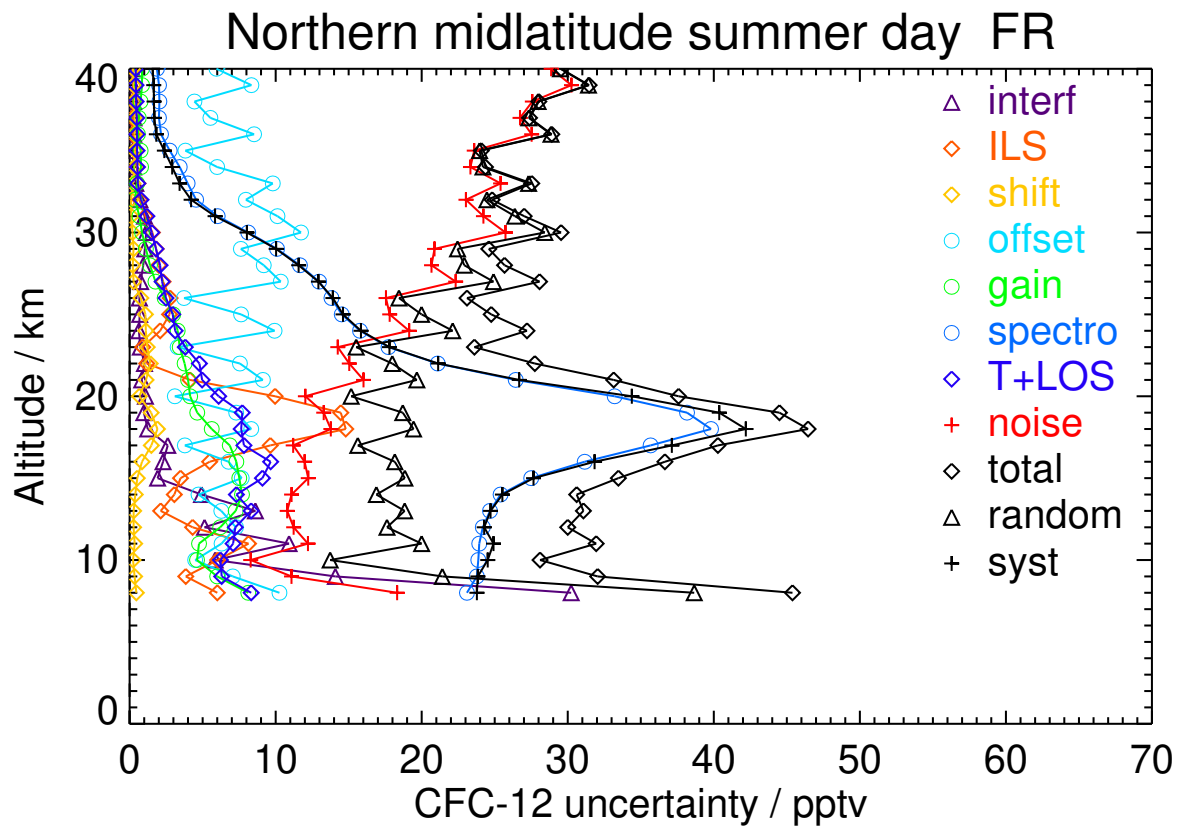

**Figure S13.** V8H\_F-12\_61 Northern midlatitude summer day

**Table S15.** CFC-12 error budget for Northern midlatitude summer night. All uncertainties are  $1\sigma$ .

| altitude<br>(km) | mean target<br>(pptv) | interf<br>(pptv) | ILS<br>(pptv) | shift<br>(pptv) | offset<br>(pptv) | gain<br>(pptv) | spectro<br>(pptv) | T+LOS<br>(pptv) | noise<br>(pptv) | random<br>(pptv) | syst<br>(pptv) | total<br>(pptv) |
|------------------|-----------------------|------------------|---------------|-----------------|------------------|----------------|-------------------|-----------------|-----------------|------------------|----------------|-----------------|
| 8                | 557.78                | 26.53            | 3.55          | 0.43            | 9.92             | 6.79           | 25.96             | 7.48            | 17.54           | 35.58            | 25.15          | 43.57           |
| 11               | 529.44                | 8.63             | 4.84          | 0.36            | 4.87             | 5.23           | 24.43             | 6.42            | 10.87           | 17.13            | 24.74          | 30.09           |
| 14               | 525.76                | 5.07             | 1.98          | 0.42            | 4.11             | 8.01           | 24.75             | 7.50            | 10.67           | 15.52            | 25.55          | 29.90           |
| 17               | 483.69                | 2.28             | 7.73          | 1.06            | 3.54             | 6.58           | 31.02             | 8.39            | 10.98           | 15.32            | 32.26          | 35.71           |
| 20               | 346.19                | 0.96             | 11.21         | 0.66            | 2.93             | 4.05           | 32.43             | 6.65            | 11.89           | 15.07            | 34.09          | 37.28           |
| 23               | 224.30                | 0.69             | 0.59          | 0.97            | 2.85             | 2.92           | 16.41             | 3.91            | 14.01           | 15.09            | 16.48          | 22.35           |
| 26               | 167.49                | 0.64             | 2.55          | 0.65            | 3.11             | 1.92           | 13.72             | 2.52            | 17.35           | 18.13            | 13.70          | 22.72           |
| 29               | 93.00                 | 0.88             | 1.80          | 0.23            | 7.38             | 1.13           | 9.53              | 1.73            | 20.80           | 22.28            | 9.48           | 24.22           |
| 32               | 43.23                 | 0.77             | 0.62          | 0.09            | 8.21             | 0.40           | 4.38              | 0.83            | 23.75           | 25.25            | 3.86           | 25.54           |
| 35               | 17.24                 | 0.19             | 0.39          | 0.34            | 3.04             | 0.72           | 2.68              | 0.51            | 23.51           | 23.79            | 2.11           | 23.88           |
| 38               | 1.14                  | 0.25             | 0.27          | 0.35            | 3.41             | 0.70           | 2.00              | 0.48            | 27.75           | 28.00            | 1.55           | 28.04           |
| 41               | -0.07                 | 0.16             | 0.25          | 0.18            | 4.09             | 0.76           | 1.70              | 0.38            | 29.23           | 29.53            | 1.55           | 29.58           |

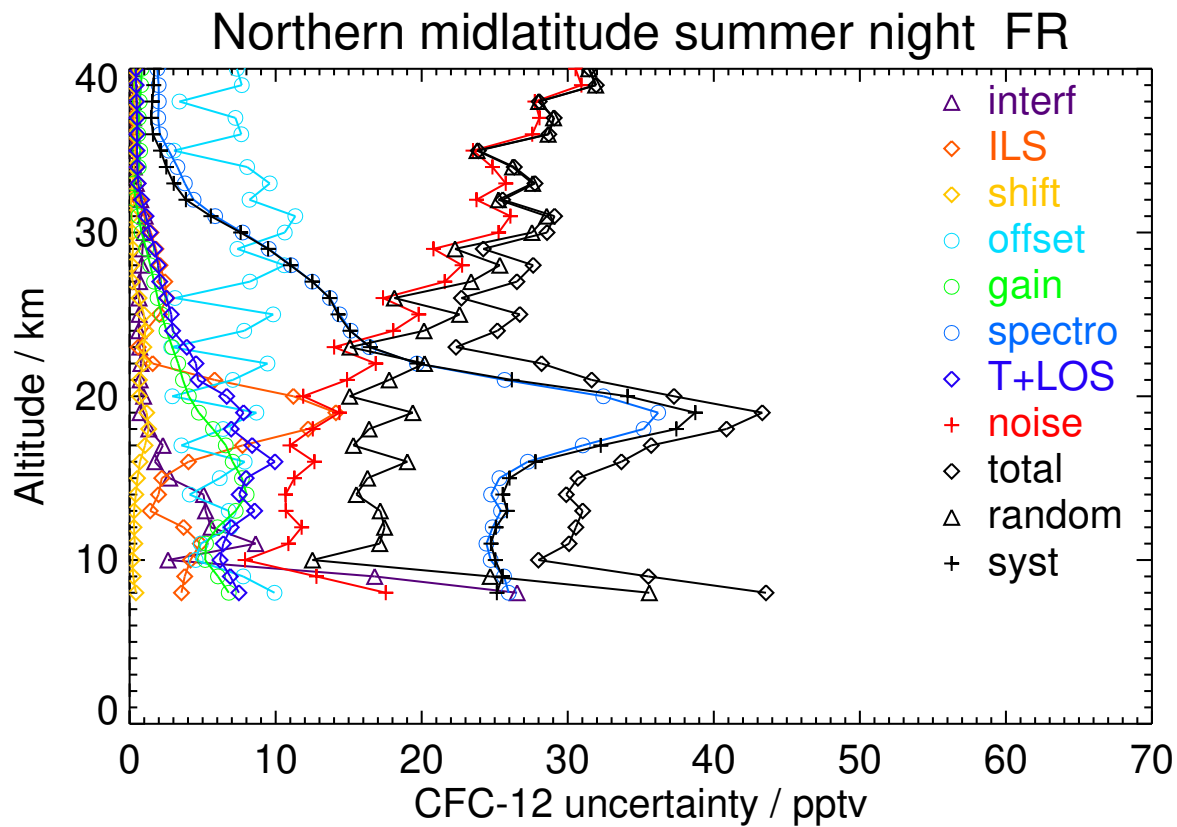

**Figure S14.** V8H\_F-12\_61 Northern midlatitude summer night



**Table S16.** CFC-12 error budget for Northern midlatitude autumn day. All uncertainties are  $1\sigma$ .

| altitude<br>(km) | mean target<br>(pptv) | interf<br>(pptv) | ILS<br>(pptv) | shift<br>(pptv) | offset<br>(pptv) | gain<br>(pptv) | spectro<br>(pptv) | T+LOS<br>(pptv) | noise<br>(pptv) | random<br>(pptv) | syst<br>(pptv) | total<br>(pptv) |
|------------------|-----------------------|------------------|---------------|-----------------|------------------|----------------|-------------------|-----------------|-----------------|------------------|----------------|-----------------|
| 8                | 549.03                | 25.20            | 2.96          | 0.41            | 9.82             | 6.37           | 26.98             | 8.62            | 15.69           | 33.38            | 26.74          | 42.77           |
| 11               | 537.05                | 6.35             | 5.25          | 0.28            | 4.94             | 6.99           | 22.32             | 6.24            | 9.27            | 14.90            | 23.29          | 27.65           |
| 14               | 530.82                | 5.02             | 2.98          | 0.66            | 6.16             | 6.85           | 28.74             | 9.02            | 11.23           | 18.96            | 28.16          | 33.95           |
| 17               | 463.25                | 1.77             | 8.43          | 1.55            | 6.16             | 7.52           | 34.80             | 9.81            | 11.95           | 18.17            | 35.93          | 40.26           |
| 20               | 303.77                | 0.52             | 12.47         | 0.58            | 6.01             | 3.36           | 31.70             | 6.70            | 12.97           | 17.94            | 33.16          | 37.70           |
| 23               | 208.92                | 0.80             | 1.59          | 0.49            | 6.24             | 2.71           | 16.36             | 3.64            | 15.56           | 18.20            | 15.54          | 23.93           |
| 26               | 138.60                | 0.65             | 2.37          | 0.24            | 6.40             | 1.70           | 12.90             | 2.18            | 18.87           | 20.59            | 12.37          | 24.03           |
| 29               | 86.26                 | 0.76             | 1.36          | 0.15            | 9.40             | 1.10           | 7.94              | 1.28            | 22.61           | 24.80            | 7.26           | 25.84           |
| 32               | 55.42                 | 0.54             | 0.79          | 0.11            | 10.11            | 0.50           | 5.26              | 0.76            | 25.74           | 27.83            | 4.41           | 28.18           |
| 35               | 19.54                 | 0.33             | 0.58          | 0.24            | 4.93             | 0.57           | 3.50              | 0.48            | 25.78           | 26.36            | 2.75           | 26.50           |
| 38               | 2.73                  | 0.28             | 0.28          | 0.26            | 4.90             | 0.56           | 1.97              | 0.54            | 30.36           | 30.80            | 1.47           | 30.83           |
| 41               | -1.90                 | 0.27             | 0.33          | 0.28            | 6.22             | 0.58           | 2.11              | 0.45            | 32.79           | 33.42            | 1.59           | 33.45           |

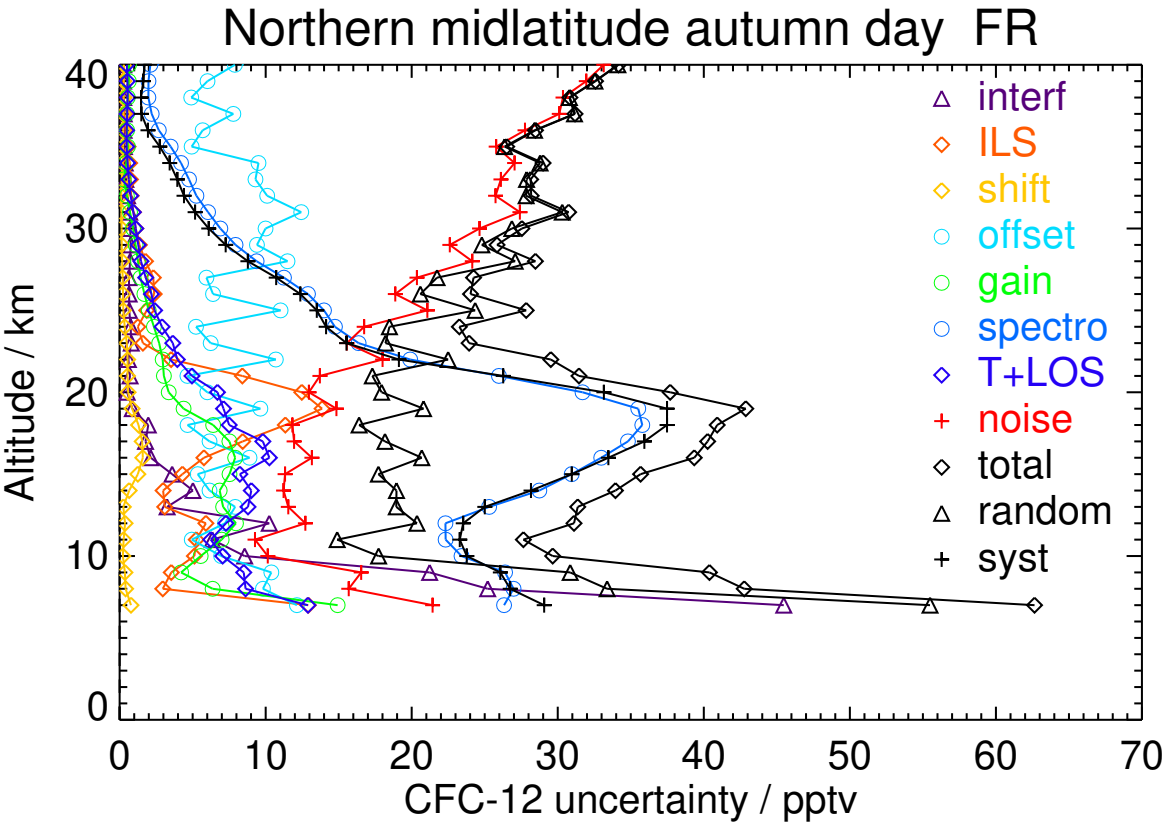

**Figure S15.** V8H\_F-12\_61 Northern midlatitude autumn day

**Table S17.** CFC-12 error budget for Northern midlatitude autumn night. All uncertainties are  $1\sigma$ .

| altitude<br>(km) | mean target<br>(pptv) | interf<br>(pptv) | ILS<br>(pptv) | shift<br>(pptv) | offset<br>(pptv) | gain<br>(pptv) | spectro<br>(pptv) | T+LOS<br>(pptv) | noise<br>(pptv) | random<br>(pptv) | syst<br>(pptv) | total<br>(pptv) |
|------------------|-----------------------|------------------|---------------|-----------------|------------------|----------------|-------------------|-----------------|-----------------|------------------|----------------|-----------------|
| 8                | 541.86                | 9.38             | 3.88          | 0.54            | 5.92             | 5.43           | 25.85             | 6.15            | 9.44            | 17.10            | 25.90          | 31.03           |
| 11               | 529.23                | 7.04             | 3.28          | 0.25            | 6.27             | 6.87           | 24.09             | 6.82            | 10.04           | 16.59            | 24.48          | 29.57           |
| 14               | 513.74                | 3.23             | 2.34          | 0.39            | 6.65             | 6.79           | 27.78             | 8.19            | 10.59           | 16.19            | 28.19          | 32.51           |
| 17               | 429.29                | 1.66             | 8.06          | 1.04            | 7.17             | 6.71           | 30.63             | 8.51            | 11.65           | 17.75            | 31.56          | 36.21           |
| 20               | 302.98                | 0.64             | 10.17         | 0.72            | 7.65             | 4.13           | 27.11             | 5.44            | 13.62           | 18.12            | 28.31          | 33.61           |
| 23               | 210.21                | 0.66             | 1.53          | 0.41            | 8.38             | 2.59           | 16.62             | 3.35            | 16.79           | 19.88            | 15.93          | 25.48           |
| 26               | 151.48                | 0.65             | 1.90          | 0.14            | 9.06             | 1.73           | 13.33             | 2.10            | 20.54           | 23.10            | 12.62          | 26.32           |
| 29               | 86.94                 | 0.77             | 1.74          | 0.14            | 11.19            | 1.16           | 9.61              | 1.51            | 24.55           | 27.41            | 8.76           | 28.77           |
| 32               | 45.38                 | 0.39             | 0.97          | 0.18            | 9.98             | 0.47           | 5.24              | 0.87            | 25.93           | 28.02            | 4.07           | 28.31           |
| 35               | 22.61                 | 0.35             | 0.67          | 0.24            | 6.99             | 0.46           | 3.57              | 0.52            | 27.34           | 28.38            | 2.22           | 28.47           |
| 38               | 5.70                  | 0.30             | 0.38          | 0.25            | 6.21             | 0.49           | 2.21              | 0.50            | 31.35           | 32.01            | 1.62           | 32.05           |
| 41               | -3.86                 | 0.24             | 0.25          | 0.25            | 7.05             | 0.55           | 1.74              | 0.42            | 33.76           | 34.52            | 1.40           | 34.54           |

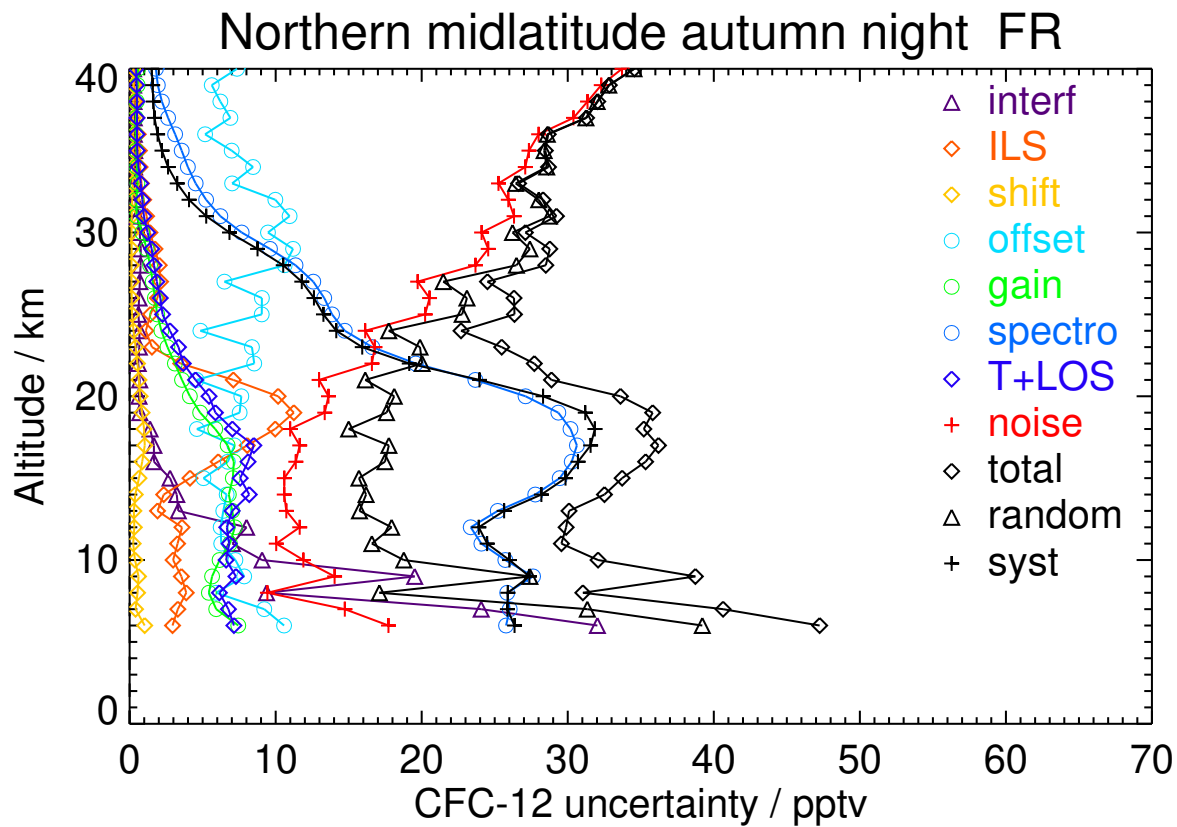

**Figure S16.** V8H\_F-12\_61 Northern midlatitude autumn night

**Table S18.** CFC-12 error budget for Tropics day. All uncertainties are  $1\sigma$ .

| altitude<br>(km) | mean target<br>(pptv) | interf<br>(pptv) | ILS<br>(pptv) | shift<br>(pptv) | offset<br>(pptv) | gain<br>(pptv) | spectro<br>(pptv) | T+LOS<br>(pptv) | noise<br>(pptv) | random<br>(pptv) | syst<br>(pptv) | total<br>(pptv) |
|------------------|-----------------------|------------------|---------------|-----------------|------------------|----------------|-------------------|-----------------|-----------------|------------------|----------------|-----------------|
| 8                | 559.59                | 28.09            | 9.67          | 0.53            | 7.92             | 13.20          | 27.25             | 8.23            | 13.12           | 34.94            | 29.69          | 45.85           |
| 11               | 528.65                | 11.94            | 9.68          | 0.57            | 7.50             | 7.20           | 22.23             | 7.40            | 11.29           | 22.11            | 23.07          | 31.95           |
| 14               | 561.13                | 4.11             | 6.16          | 1.46            | 8.45             | 11.81          | 23.11             | 10.12           | 14.00           | 20.89            | 25.76          | 33.17           |
| 17               | 559.83                | 9.67             | 19.11         | 0.82            | 10.68            | 4.32           | 44.36             | 10.94           | 17.49           | 26.54            | 47.76          | 54.64           |
| 20               | 472.52                | 2.20             | 5.93          | 0.39            | 8.82             | 6.45           | 28.51             | 6.94            | 17.57           | 21.61            | 29.37          | 36.46           |
| 23               | 422.00                | 1.05             | 2.10          | 1.00            | 9.17             | 4.17           | 26.13             | 5.34            | 19.15           | 22.29            | 26.26          | 34.44           |
| 26               | 358.91                | 0.92             | 3.42          | 0.38            | 9.82             | 3.49           | 24.54             | 4.27            | 21.72           | 24.49            | 24.77          | 34.84           |
| 29               | 278.73                | 1.43             | 3.46          | 0.30            | 11.52            | 3.38           | 19.70             | 3.38            | 24.82           | 27.99            | 19.76          | 34.26           |
| 32               | 193.50                | 0.68             | 2.40          | 0.28            | 9.84             | 0.91           | 14.66             | 2.16            | 24.93           | 27.19            | 14.34          | 30.74           |
| 35               | 93.97                 | 0.43             | 1.56          | 0.30            | 8.32             | 0.82           | 9.24              | 1.25            | 27.06           | 28.49            | 8.96           | 29.86           |
| 38               | 36.07                 | 0.34             | 0.83          | 0.34            | 8.39             | 0.87           | 4.87              | 0.86            | 29.86           | 31.11            | 4.51           | 31.44           |
| 41               | 11.54                 | 0.24             | 0.37          | 0.16            | 9.93             | 0.70           | 2.36              | 0.52            | 31.67           | 33.24            | 1.87           | 33.29           |

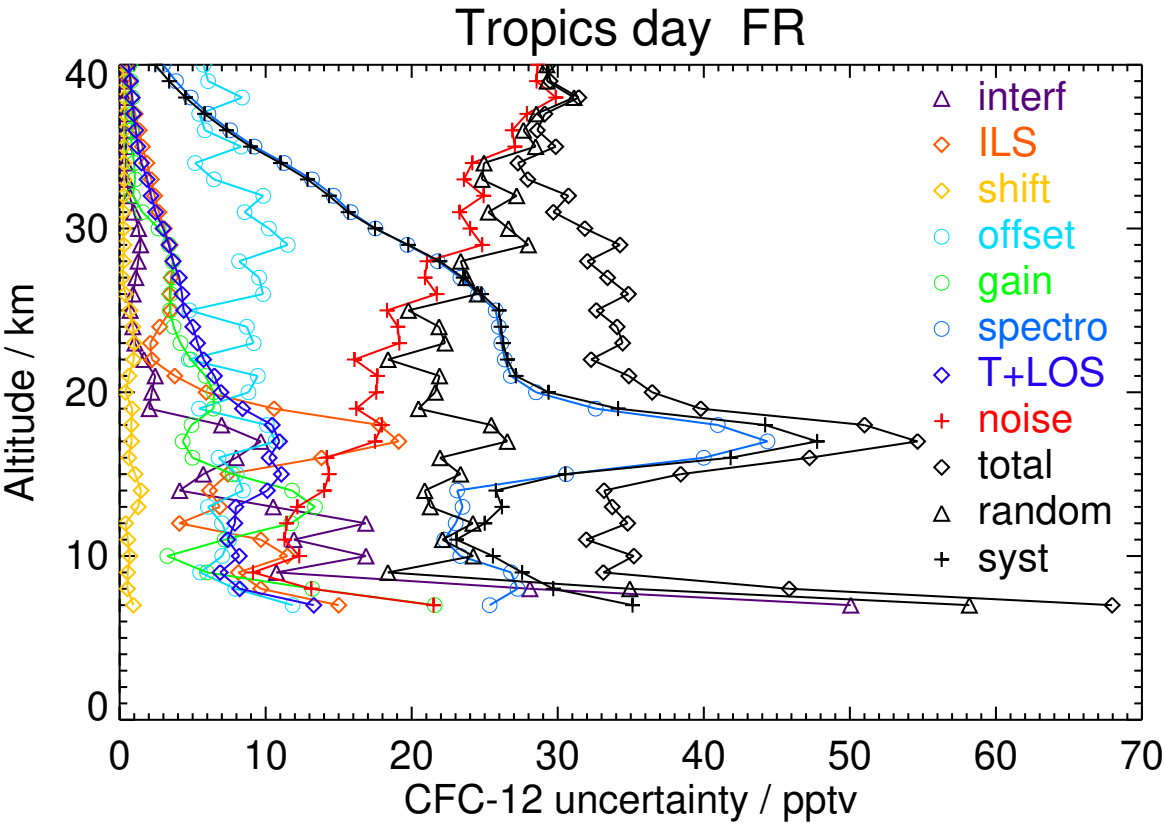

**Figure S17.** V8H\_F-12\_61 Tropics day

**Table S19.** CFC-12 error budget for Tropics night. All uncertainties are  $1\sigma$ .

| altitude<br>(km) | mean target<br>(pptv) | interf<br>(pptv) | ILS<br>(pptv) | shift<br>(pptv) | offset<br>(pptv) | gain<br>(pptv) | spectro<br>(pptv) | T+LOS<br>(pptv) | noise<br>(pptv) | random<br>(pptv) | syst<br>(pptv) | total<br>(pptv) |
|------------------|-----------------------|------------------|---------------|-----------------|------------------|----------------|-------------------|-----------------|-----------------|------------------|----------------|-----------------|
| 8                | 537.03                | 17.78            | 4.37          | 0.76            | 6.16             | 11.06          | 24.83             | 6.39            | 9.42            | 23.03            | 26.68          | 35.25           |
| 11               | 539.66                | 6.58             | 2.63          | 0.54            | 7.33             | 6.13           | 25.20             | 6.00            | 10.01           | 17.07            | 24.93          | 30.22           |
| 14               | 566.17                | 2.80             | 6.79          | 1.80            | 9.38             | 11.35          | 23.59             | 10.80           | 14.34           | 21.40            | 26.37          | 33.95           |
| 17               | 558.74                | 7.10             | 17.54         | 1.14            | 11.65            | 3.68           | 41.39             | 10.18           | 18.92           | 27.27            | 44.04          | 51.80           |
| 20               | 503.62                | 1.78             | 3.98          | 0.68            | 10.18            | 6.12           | 31.80             | 7.19            | 18.83           | 23.14            | 32.28          | 39.72           |
| 23               | 442.58                | 0.88             | 3.28          | 1.59            | 10.32            | 4.73           | 28.42             | 5.95            | 20.12           | 23.80            | 28.71          | 37.30           |
| 26               | 376.66                | 0.76             | 3.89          | 0.43            | 10.69            | 3.41           | 25.39             | 4.57            | 22.34           | 25.44            | 25.67          | 36.14           |
| 29               | 302.06                | 1.23             | 4.09          | 0.33            | 12.30            | 3.41           | 20.99             | 3.63            | 25.29           | 28.60            | 21.36          | 35.70           |
| 32               | 211.40                | 0.57             | 2.10          | 0.32            | 10.51            | 1.01           | 15.76             | 2.23            | 25.53           | 27.89            | 15.61          | 31.96           |
| 35               | 111.92                | 0.34             | 1.07          | 0.32            | 9.00             | 0.84           | 9.85              | 1.42            | 27.46           | 29.05            | 9.60           | 30.60           |
| 38               | 43.05                 | 0.33             | 0.81          | 0.33            | 8.72             | 0.85           | 5.65              | 0.97            | 30.32           | 31.62            | 5.46           | 32.09           |
| 41               | 8.24                  | 0.18             | 0.27          | 0.14            | 9.34             | 0.67           | 2.27              | 0.53            | 31.10           | 32.50            | 1.97           | 32.56           |

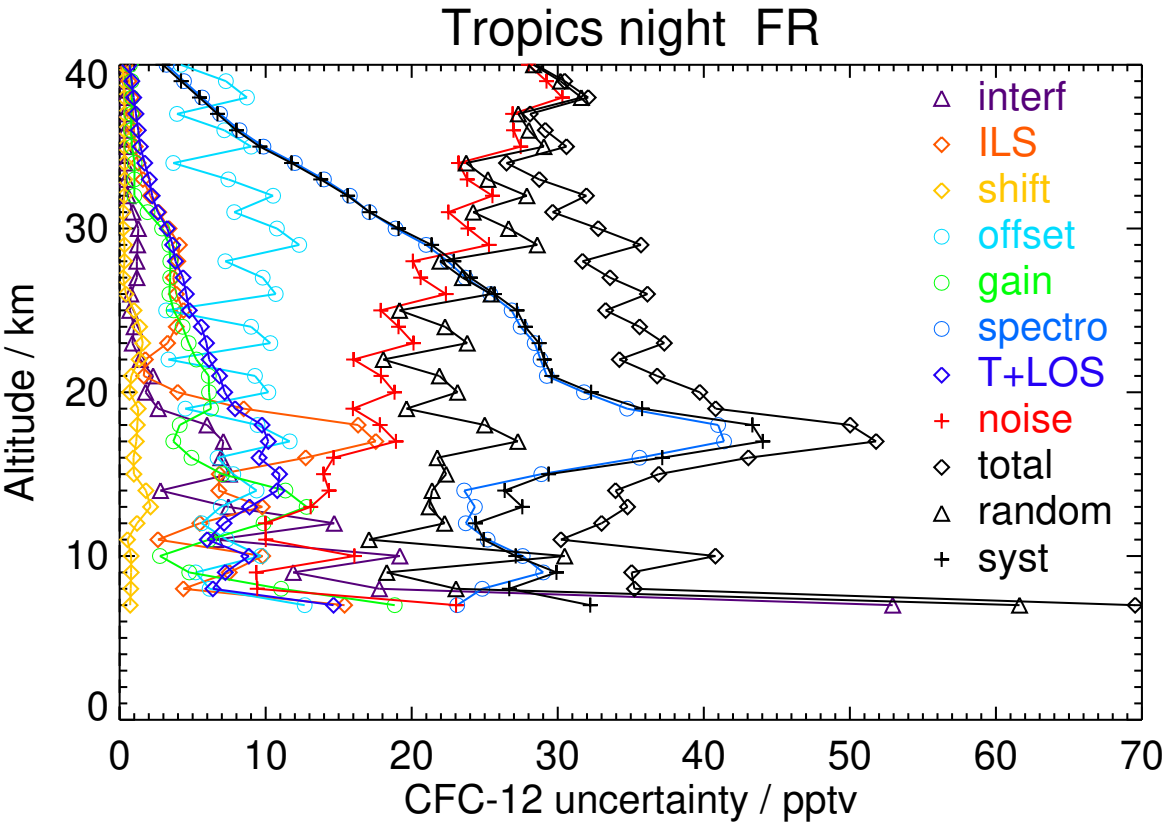

**Figure S18.** V8H\_F-12\_61 Tropics night

**Table S20.** CFC-12 error budget for Southern midlatitude winter day. All uncertainties are  $1\sigma$ .

| altitude<br>(km) | mean target<br>(pptv) | interf<br>(pptv) | ILS<br>(pptv) | shift<br>(pptv) | offset<br>(pptv) | gain<br>(pptv) | spectro<br>(pptv) | T+LOS<br>(pptv) | noise<br>(pptv) | random<br>(pptv) | syst<br>(pptv) | total<br>(pptv) |
|------------------|-----------------------|------------------|---------------|-----------------|------------------|----------------|-------------------|-----------------|-----------------|------------------|----------------|-----------------|
| 5                | 515.36                | 21.76            | 3.36          | 0.40            | 9.65             | 9.40           | 22.88             | 5.76            | 17.19           | 30.71            | 23.98          | 38.96           |
| 8                | 542.95                | 7.13             | 2.72          | 0.40            | 4.58             | 5.93           | 28.55             | 6.01            | 9.56            | 14.77            | 28.96          | 32.51           |
| 11               | 521.03                | 6.51             | 2.12          | 0.14            | 6.00             | 6.96           | 26.06             | 8.22            | 10.86           | 17.50            | 26.26          | 31.56           |
| 14               | 470.96                | 1.60             | 3.84          | 0.44            | 5.63             | 6.78           | 30.15             | 8.30            | 11.00           | 16.31            | 30.47          | 34.56           |
| 17               | 403.25                | 0.94             | 6.52          | 0.91            | 5.69             | 6.42           | 29.28             | 7.93            | 11.60           | 16.13            | 30.21          | 34.24           |
| 20               | 300.40                | 0.77             | 7.83          | 0.69            | 5.79             | 4.00           | 26.08             | 5.24            | 13.88           | 17.38            | 26.65          | 31.81           |
| 23               | 227.90                | 0.75             | 1.87          | 0.45            | 6.68             | 2.80           | 18.35             | 3.34            | 17.74           | 19.97            | 17.90          | 26.82           |
| 26               | 166.51                | 1.08             | 1.78          | 0.24            | 8.00             | 1.98           | 13.93             | 2.27            | 22.46           | 24.38            | 13.49          | 27.86           |
| 29               | 123.79                | 1.02             | 1.94          | 0.20            | 10.77            | 1.48           | 11.83             | 1.85            | 26.98           | 29.50            | 11.14          | 31.54           |
| 32               | 48.48                 | 0.64             | 1.30          | 0.21            | 9.75             | 0.62           | 7.12              | 1.24            | 29.11           | 30.95            | 6.28           | 31.58           |
| 35               | 18.12                 | 0.66             | 0.64          | 0.25            | 6.78             | 0.32           | 3.37              | 0.71            | 31.21           | 32.07            | 2.10           | 32.14           |
| 38               | 5.97                  | 0.88             | 0.54          | 0.26            | 6.65             | 0.40           | 2.41              | 0.68            | 34.92           | 35.63            | 1.28           | 35.65           |
| 41               | -3.56                 | 0.96             | 0.50          | 0.19            | 8.85             | 0.47           | 1.91              | 0.64            | 37.15           | 38.25            | 1.09           | 38.26           |

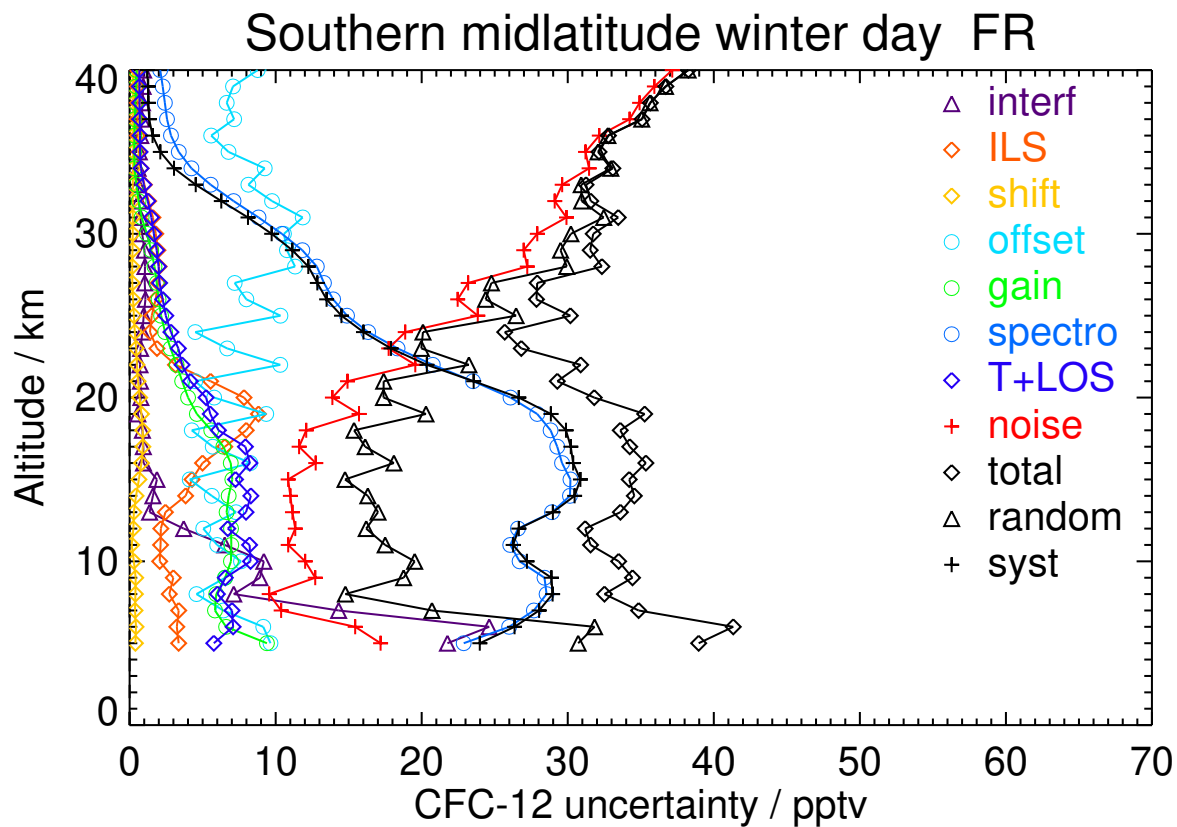

**Figure S19.** V8H\_F-12\_61 Southern midlatitude winter day

**Table S21.** CFC-12 error budget for Southern midlatitude winter night. All uncertainties are  $1\sigma$ .

| altitude<br>(km) | mean target<br>(pptv) | interf<br>(pptv) | ILS<br>(pptv) | shift<br>(pptv) | offset<br>(pptv) | gain<br>(pptv) | spectro<br>(pptv) | T+LOS<br>(pptv) | noise<br>(pptv) | random<br>(pptv) | syst<br>(pptv) | total<br>(pptv) |
|------------------|-----------------------|------------------|---------------|-----------------|------------------|----------------|-------------------|-----------------|-----------------|------------------|----------------|-----------------|
| 5                | 538.27                | 27.55            | 3.04          | 0.41            | 9.76             | 5.67           | 21.78             | 7.45            | 17.00           | 35.88            | 20.68          | 41.41           |
| 8                | 525.63                | 8.23             | 4.29          | 3.28            | 6.49             | 5.05           | 23.54             | 7.09            | 11.43           | 18.98            | 23.22          | 29.99           |
| 11               | 529.76                | 11.64            | 2.92          | 2.11            | 6.32             | 7.24           | 22.86             | 8.25            | 11.85           | 20.90            | 23.14          | 31.18           |
| 14               | 483.53                | 3.29             | 2.49          | 0.71            | 5.26             | 6.90           | 27.18             | 8.36            | 11.34           | 16.97            | 27.24          | 32.10           |
| 17               | 405.53                | 1.97             | 7.00          | 0.99            | 5.21             | 5.98           | 28.34             | 8.13            | 11.86           | 16.21            | 29.39          | 33.57           |
| 20               | 294.62                | 1.06             | 8.17          | 0.69            | 5.40             | 3.66           | 25.59             | 5.35            | 13.97           | 17.59            | 26.08          | 31.46           |
| 23               | 211.73                | 0.75             | 1.47          | 0.32            | 5.96             | 2.52           | 16.71             | 3.20            | 17.49           | 19.22            | 16.45          | 25.30           |
| 26               | 150.66                | 1.05             | 1.57          | 0.24            | 7.61             | 1.69           | 12.49             | 2.06            | 21.87           | 23.84            | 11.60          | 26.52           |
| 29               | 115.83                | 1.05             | 1.64          | 0.16            | 10.80            | 1.37           | 10.65             | 1.65            | 26.45           | 29.09            | 9.58           | 30.62           |
| 32               | 53.95                 | 0.65             | 1.32          | 0.21            | 10.23            | 0.67           | 7.92              | 1.23            | 28.48           | 30.67            | 6.49           | 31.35           |
| 35               | 8.68                  | 0.47             | 0.71          | 0.25            | 7.46             | 0.42           | 3.85              | 0.78            | 30.48           | 31.57            | 2.20           | 31.64           |
| 38               | 8.35                  | 0.56             | 0.30          | 0.22            | 6.87             | 0.47           | 1.34              | 0.53            | 33.85           | 34.57            | 0.76           | 34.58           |
| 41               | 14.09                 | 0.52             | 0.32          | 0.20            | 8.78             | 0.51           | 1.38              | 0.51            | 36.38           | 37.45            | 0.90           | 37.46           |

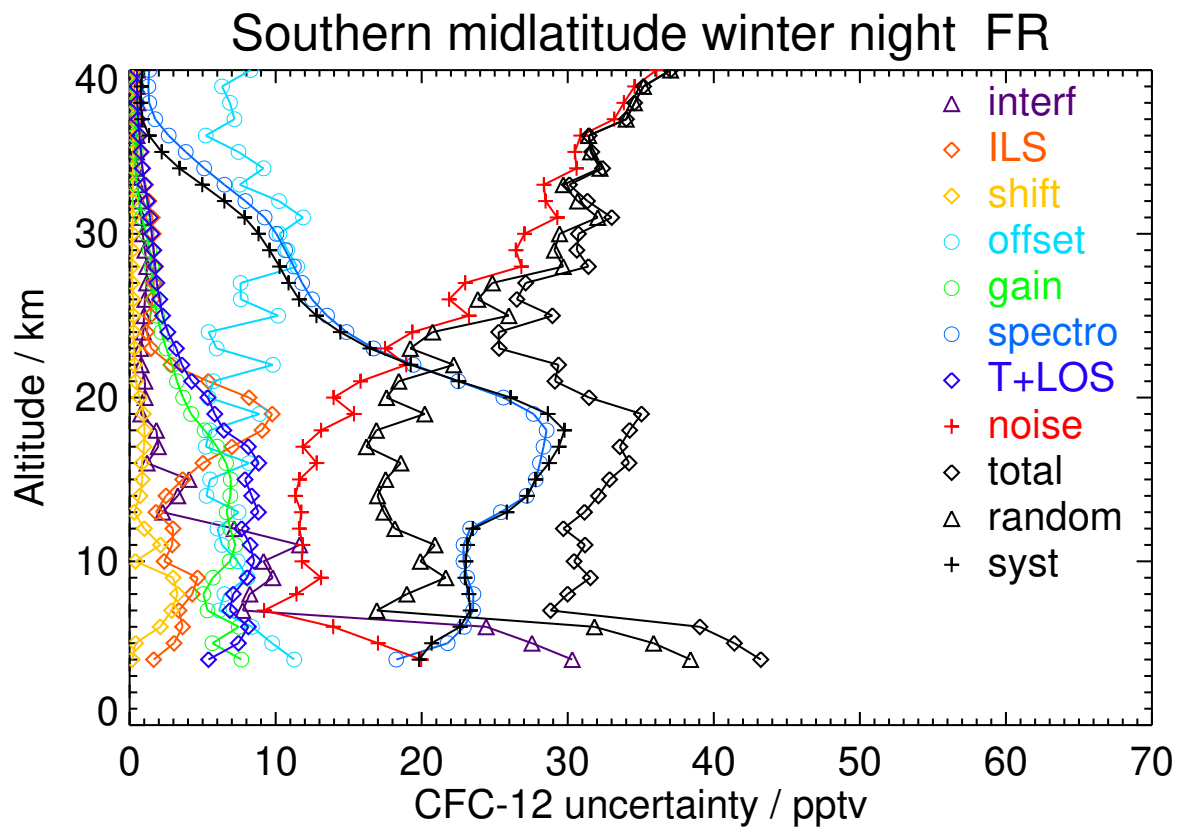

**Figure S20.** V8H\_F-12\_61 Southern midlatitude winter night

**Table S22.** CFC-12 error budget for Southern midlatitude spring day. All uncertainties are  $1\sigma$ .

| altitude<br>(km) | mean target<br>(pptv) | interf<br>(pptv) | ILS<br>(pptv) | shift<br>(pptv) | offset<br>(pptv) | gain<br>(pptv) | spectro<br>(pptv) | T+LOS<br>(pptv) | noise<br>(pptv) | random<br>(pptv) | syst<br>(pptv) | total<br>(pptv) |
|------------------|-----------------------|------------------|---------------|-----------------|------------------|----------------|-------------------|-----------------|-----------------|------------------|----------------|-----------------|
| 8                | 546.89                | 7.52             | 3.00          | 0.36            | 5.41             | 6.24           | 26.84             | 6.69            | 9.02            | 15.61            | 27.14          | 31.31           |
| 11               | 506.49                | 6.07             | 2.27          | 0.23            | 6.95             | 6.69           | 27.63             | 8.47            | 10.60           | 17.85            | 27.65          | 32.91           |
| 14               | 452.08                | 3.18             | 7.31          | 0.56            | 7.31             | 5.50           | 28.46             | 8.65            | 10.84           | 19.20            | 27.96          | 33.91           |
| 17               | 360.41                | 1.48             | 9.55          | 0.94            | 7.56             | 5.07           | 30.27             | 7.67            | 11.63           | 19.53            | 30.10          | 35.89           |
| 20               | 248.11                | 1.39             | 7.94          | 1.15            | 8.17             | 3.13           | 22.31             | 4.52            | 13.66           | 20.50            | 20.66          | 29.11           |
| 23               | 194.89                | 0.90             | 1.59          | 0.46            | 9.03             | 2.58           | 14.26             | 2.55            | 16.81           | 20.85            | 12.23          | 24.17           |
| 26               | 164.04                | 1.01             | 2.06          | 0.35            | 10.00            | 2.44           | 12.93             | 1.90            | 20.24           | 23.98            | 10.82          | 26.30           |
| 29               | 127.80                | 1.26             | 2.18          | 0.26            | 11.42            | 1.70           | 12.32             | 1.78            | 23.78           | 27.44            | 10.36          | 29.33           |
| 32               | 48.49                 | 0.48             | 1.43          | 0.26            | 9.32             | 0.62           | 7.52              | 1.22            | 23.94           | 26.13            | 6.18           | 26.85           |
| 35               | 12.17                 | 0.35             | 0.51          | 0.29            | 8.31             | 0.54           | 2.61              | 0.52            | 26.21           | 27.57            | 1.93           | 27.63           |
| 38               | 0.18                  | 0.37             | 0.30          | 0.27            | 7.44             | 0.62           | 1.74              | 0.45            | 29.54           | 30.50            | 1.31           | 30.52           |
| 41               | -1.46                 | 0.23             | 0.30          | 0.24            | 7.54             | 0.77           | 1.65              | 0.39            | 32.16           | 33.05            | 1.44           | 33.09           |

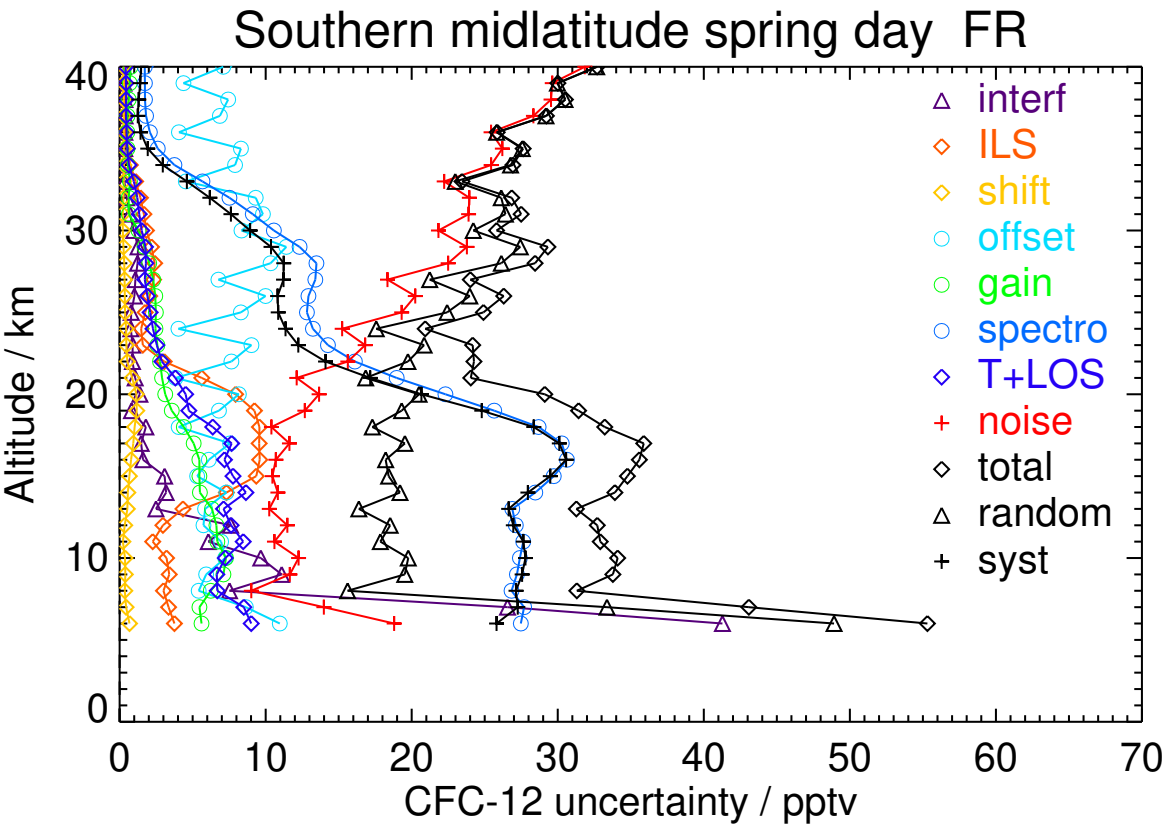

**Figure S21.** V8H\_F-12\_61 Southern midlatitude spring day

**Table S23.** CFC-12 error budget for Southern midlatitude spring night. All uncertainties are  $1\sigma$ .

| altitude<br>(km) | mean target<br>(pptv) | interf<br>(pptv) | ILS<br>(pptv) | shift<br>(pptv) | offset<br>(pptv) | gain<br>(pptv) | spectro<br>(pptv) | T+LOS<br>(pptv) | noise<br>(pptv) | random<br>(pptv) | syst<br>(pptv) | total<br>(pptv) |
|------------------|-----------------------|------------------|---------------|-----------------|------------------|----------------|-------------------|-----------------|-----------------|------------------|----------------|-----------------|
| 8                | 540.72                | 5.82             | 3.21          | 0.46            | 4.99             | 5.50           | 25.01             | 6.59            | 8.65            | 14.76            | 25.01          | 29.04           |
| 11               | 501.40                | 8.43             | 2.18          | 0.27            | 6.35             | 5.81           | 24.62             | 7.78            | 9.85            | 17.90            | 24.36          | 30.23           |
| 14               | 465.90                | 3.05             | 4.81          | 0.39            | 6.61             | 6.63           | 28.13             | 8.03            | 10.08           | 17.21            | 27.96          | 32.83           |
| 17               | 373.10                | 1.16             | 7.93          | 0.81            | 7.15             | 5.93           | 26.27             | 7.58            | 10.76           | 16.32            | 27.36          | 31.85           |
| 20               | 293.03                | 1.13             | 8.29          | 1.23            | 7.92             | 4.23           | 21.15             | 4.48            | 12.63           | 17.53            | 21.72          | 27.91           |
| 23               | 243.90                | 0.74             | 1.66          | 0.24            | 9.14             | 3.14           | 14.96             | 2.71            | 15.87           | 19.27            | 14.44          | 24.08           |
| 26               | 232.51                | 0.74             | 1.53          | 0.20            | 10.48            | 2.49           | 14.64             | 2.22            | 19.34           | 22.61            | 14.18          | 26.69           |
| 29               | 176.78                | 0.89             | 2.44          | 0.30            | 11.94            | 2.21           | 14.87             | 2.19            | 23.64           | 26.84            | 14.79          | 30.64           |
| 32               | 87.04                 | 0.26             | 1.43          | 0.26            | 9.25             | 0.69           | 9.95              | 1.52            | 23.60           | 25.68            | 9.31           | 27.32           |
| 35               | 19.50                 | 0.36             | 0.85          | 0.26            | 9.04             | 0.43           | 4.48              | 0.70            | 27.29           | 28.90            | 3.65           | 29.13           |
| 38               | -0.75                 | 0.44             | 0.28          | 0.28            | 7.62             | 0.52           | 1.49              | 0.44            | 30.59           | 31.55            | 1.09           | 31.57           |
| 41               | 0.96                  | 0.51             | 0.31          | 0.27            | 7.71             | 0.85           | 1.93              | 0.47            | 33.34           | 34.26            | 1.53           | 34.30           |

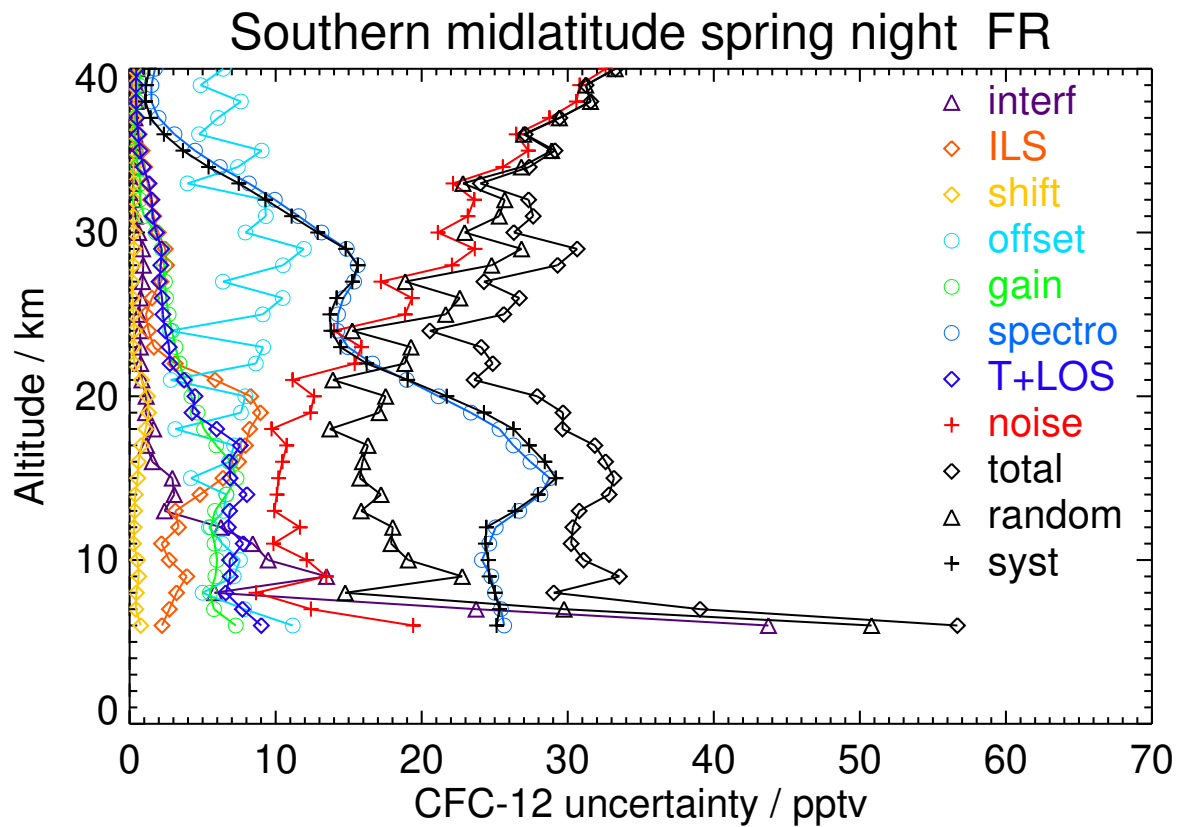

**Figure S22.** V8H\_F-12\_61 Southern midlatitude spring night



**Table S24.** CFC-12 error budget for Southern midlatitude summer day. All uncertainties are  $1\sigma$ .

| altitude<br>(km) | mean target<br>(pptv) | interf<br>(pptv) | ILS<br>(pptv) | shift<br>(pptv) | offset<br>(pptv) | gain<br>(pptv) | spectro<br>(pptv) | T+LOS<br>(pptv) | noise<br>(pptv) | random<br>(pptv) | syst<br>(pptv) | total<br>(pptv) |
|------------------|-----------------------|------------------|---------------|-----------------|------------------|----------------|-------------------|-----------------|-----------------|------------------|----------------|-----------------|
| 5                | 542.25                | 40.89            | 2.81          | 0.51            | 9.82             | 10.66          | 25.22             | 7.15            | 18.75           | 47.12            | 26.61          | 54.12           |
| 8                | 535.33                | 6.36             | 3.65          | 0.43            | 4.29             | 5.01           | 27.09             | 5.86            | 9.65            | 14.36            | 27.43          | 30.96           |
| 11               | 511.84                | 8.41             | 2.21          | 0.23            | 5.04             | 7.93           | 22.61             | 7.32            | 10.50           | 16.96            | 23.48          | 28.97           |
| 14               | 469.95                | 2.27             | 1.85          | 0.41            | 4.71             | 5.68           | 24.97             | 7.42            | 10.38           | 14.76            | 25.13          | 29.15           |
| 17               | 414.22                | 1.43             | 7.53          | 1.01            | 4.50             | 5.79           | 27.35             | 7.61            | 10.51           | 14.66            | 28.55          | 32.09           |
| 20               | 293.59                | 1.05             | 10.94         | 0.78            | 4.46             | 3.48           | 24.21             | 5.45            | 11.74           | 14.74            | 26.26          | 30.12           |
| 23               | 207.31                | 0.86             | 1.06          | 0.89            | 4.99             | 2.68           | 14.98             | 3.23            | 14.48           | 16.03            | 14.91          | 21.89           |
| 26               | 136.58                | 0.88             | 2.24          | 0.45            | 6.01             | 1.69           | 11.32             | 2.11            | 17.72           | 19.05            | 11.34          | 22.17           |
| 29               | 82.60                 | 1.31             | 1.26          | 0.16            | 8.54             | 0.87           | 6.97              | 1.28            | 21.32           | 23.13            | 6.83           | 24.12           |
| 32               | 44.64                 | 0.71             | 0.66          | 0.25            | 7.61             | 0.67           | 3.82              | 0.70            | 22.62           | 23.97            | 3.42           | 24.21           |
| 35               | 20.90                 | 0.28             | 0.39          | 0.38            | 5.46             | 0.71           | 2.65              | 0.51            | 23.54           | 24.22            | 2.32           | 24.34           |
| 38               | -0.24                 | 0.19             | 0.25          | 0.27            | 5.30             | 0.86           | 1.70              | 0.42            | 26.95           | 27.50            | 1.54           | 27.54           |
| 41               | 1.53                  | 0.22             | 0.33          | 0.25            | 5.89             | 1.01           | 1.77              | 0.39            | 28.86           | 29.47            | 1.83           | 29.53           |

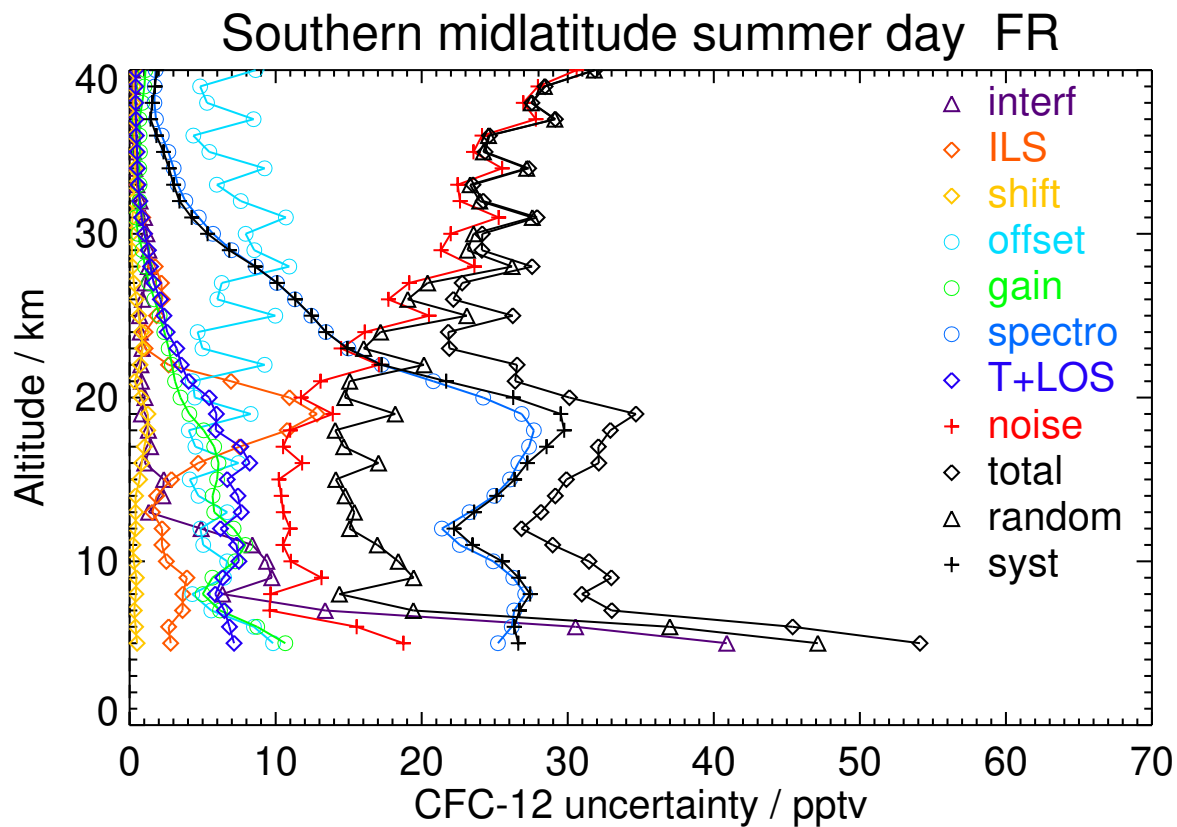

**Figure S23.** V8H\_F-12\_61 Southern midlatitude summer day

**Table S25.** CFC-12 error budget for Southern midlatitude summer night. All uncertainties are  $1\sigma$ .

| altitude<br>(km) | mean target<br>(pptv) | interf<br>(pptv) | ILS<br>(pptv) | shift<br>(pptv) | offset<br>(pptv) | gain<br>(pptv) | spectro<br>(pptv) | T+LOS<br>(pptv) | noise<br>(pptv) | random<br>(pptv) | syst<br>(pptv) | total<br>(pptv) |
|------------------|-----------------------|------------------|---------------|-----------------|------------------|----------------|-------------------|-----------------|-----------------|------------------|----------------|-----------------|
| 5                | 547.09                | 46.70            | 6.13          | 0.56            | 10.96            | 11.67          | 23.27             | 8.40            | 20.76           | 54.46            | 23.49          | 59.31           |
| 8                | 536.16                | 25.98            | 5.15          | 0.42            | 8.38             | 4.24           | 26.39             | 7.84            | 15.54           | 33.66            | 25.61          | 42.30           |
| 11               | 516.01                | 11.26            | 4.80          | 0.37            | 5.84             | 6.25           | 23.42             | 6.60            | 12.01           | 19.69            | 23.91          | 30.97           |
| 14               | 493.51                | 4.56             | 3.18          | 0.50            | 4.67             | 6.75           | 29.95             | 7.37            | 10.90           | 16.55            | 29.91          | 34.19           |
| 17               | 429.25                | 2.61             | 10.56         | 1.28            | 4.19             | 5.96           | 33.06             | 7.73            | 11.10           | 16.18            | 34.46          | 38.07           |
| 20               | 299.36                | 0.95             | 10.60         | 0.63            | 4.09             | 3.65           | 26.52             | 5.52            | 12.23           | 14.92            | 28.36          | 32.05           |
| 23               | 209.32                | 0.83             | 0.90          | 1.02            | 4.59             | 2.98           | 15.69             | 3.40            | 14.81           | 16.35            | 15.56          | 22.57           |
| 26               | 137.60                | 0.80             | 2.42          | 0.38            | 5.55             | 1.65           | 11.17             | 2.15            | 18.01           | 19.11            | 11.33          | 22.22           |
| 29               | 91.51                 | 1.27             | 1.35          | 0.17            | 8.39             | 0.96           | 7.47              | 1.39            | 21.32           | 23.11            | 7.28           | 24.23           |
| 32               | 45.55                 | 0.63             | 0.71          | 0.22            | 7.59             | 0.63           | 4.25              | 0.81            | 22.38           | 23.74            | 3.91           | 24.06           |
| 35               | 18.90                 | 0.26             | 0.36          | 0.39            | 5.29             | 0.73           | 2.64              | 0.53            | 23.38           | 24.02            | 2.37           | 24.14           |
| 38               | -3.58                 | 0.22             | 0.25          | 0.25            | 5.14             | 0.81           | 1.71              | 0.42            | 26.78           | 27.30            | 1.55           | 27.34           |
| 41               | -0.62                 | 0.23             | 0.26          | 0.23            | 5.90             | 0.99           | 1.60              | 0.38            | 28.41           | 29.03            | 1.66           | 29.08           |

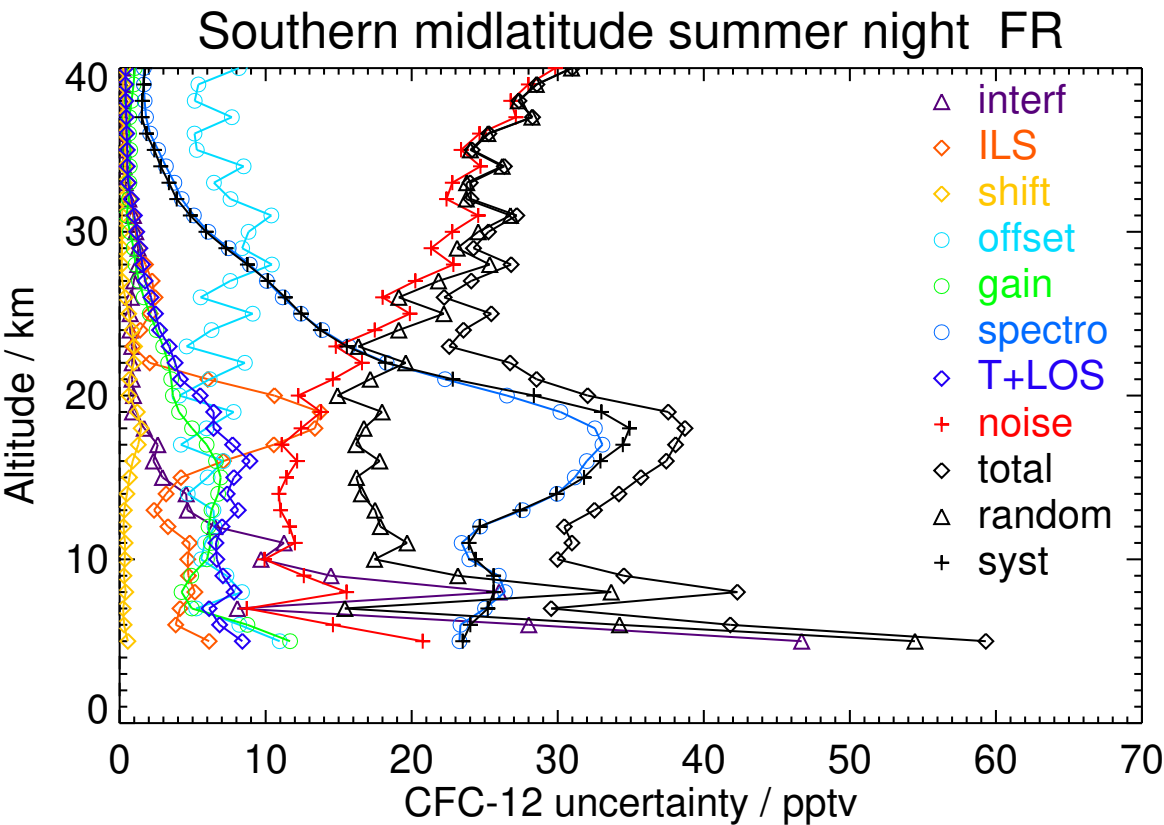

**Figure S24.** V8H\_F-12\_61 Southern midlatitude summer night

**Table S26.** CFC-12 error budget for Southern midlatitude autumn day. All uncertainties are  $1\sigma$ .

| altitude<br>(km) | mean target<br>(pptv) | interf<br>(pptv) | ILS<br>(pptv) | shift<br>(pptv) | offset<br>(pptv) | gain<br>(pptv) | spectro<br>(pptv) | T+LOS<br>(pptv) | noise<br>(pptv) | random<br>(pptv) | syst<br>(pptv) | total<br>(pptv) |
|------------------|-----------------------|------------------|---------------|-----------------|------------------|----------------|-------------------|-----------------|-----------------|------------------|----------------|-----------------|
| 5                | 555.00                | 20.55            | 4.72          | 0.21            | 8.73             | 5.90           | 24.35             | 5.77            | 14.11           | 27.05            | 25.47          | 37.15           |
| 8                | 535.99                | 23.53            | 3.76          | 0.55            | 8.53             | 5.24           | 26.96             | 7.28            | 13.60           | 30.19            | 26.87          | 40.41           |
| 11               | 524.52                | 9.71             | 3.16          | 0.29            | 7.51             | 6.44           | 23.85             | 6.74            | 12.07           | 19.34            | 24.25          | 31.02           |
| 14               | 498.34                | 2.82             | 3.12          | 0.45            | 6.43             | 7.03           | 28.09             | 7.11            | 10.54           | 16.17            | 28.25          | 32.55           |
| 17               | 413.37                | 1.46             | 10.15         | 1.70            | 6.60             | 6.28           | 32.69             | 6.11            | 11.41           | 15.83            | 34.30          | 37.78           |
| 20               | 295.70                | 0.65             | 4.97          | 0.50            | 7.28             | 4.22           | 25.38             | 4.20            | 13.62           | 17.34            | 25.36          | 30.72           |
| 23               | 192.15                | 0.60             | 1.59          | 0.52            | 8.09             | 2.69           | 16.51             | 2.84            | 16.98           | 19.64            | 16.10          | 25.39           |
| 26               | 124.53                | 0.58             | 1.97          | 0.12            | 8.37             | 1.48           | 11.24             | 1.75            | 20.57           | 22.55            | 10.97          | 25.08           |
| 29               | 74.57                 | 0.66             | 1.54          | 0.11            | 11.08            | 1.01           | 8.19              | 1.20            | 24.78           | 27.45            | 7.46           | 28.45           |
| 32               | 33.87                 | 0.31             | 0.71          | 0.17            | 10.07            | 0.30           | 4.34              | 0.59            | 26.19           | 28.20            | 3.42           | 28.41           |
| 35               | 23.04                 | 0.29             | 0.41          | 0.26            | 6.16             | 0.44           | 2.75              | 0.53            | 28.11           | 28.86            | 1.86           | 28.92           |
| 38               | 3.38                  | 0.23             | 0.34          | 0.22            | 6.47             | 0.50           | 2.15              | 0.49            | 32.27           | 32.95            | 1.77           | 32.99           |
| 41               | -10.80                | 0.25             | 0.25          | 0.20            | 8.79             | 0.45           | 1.57              | 0.39            | 34.93           | 36.04            | 1.25           | 36.06           |

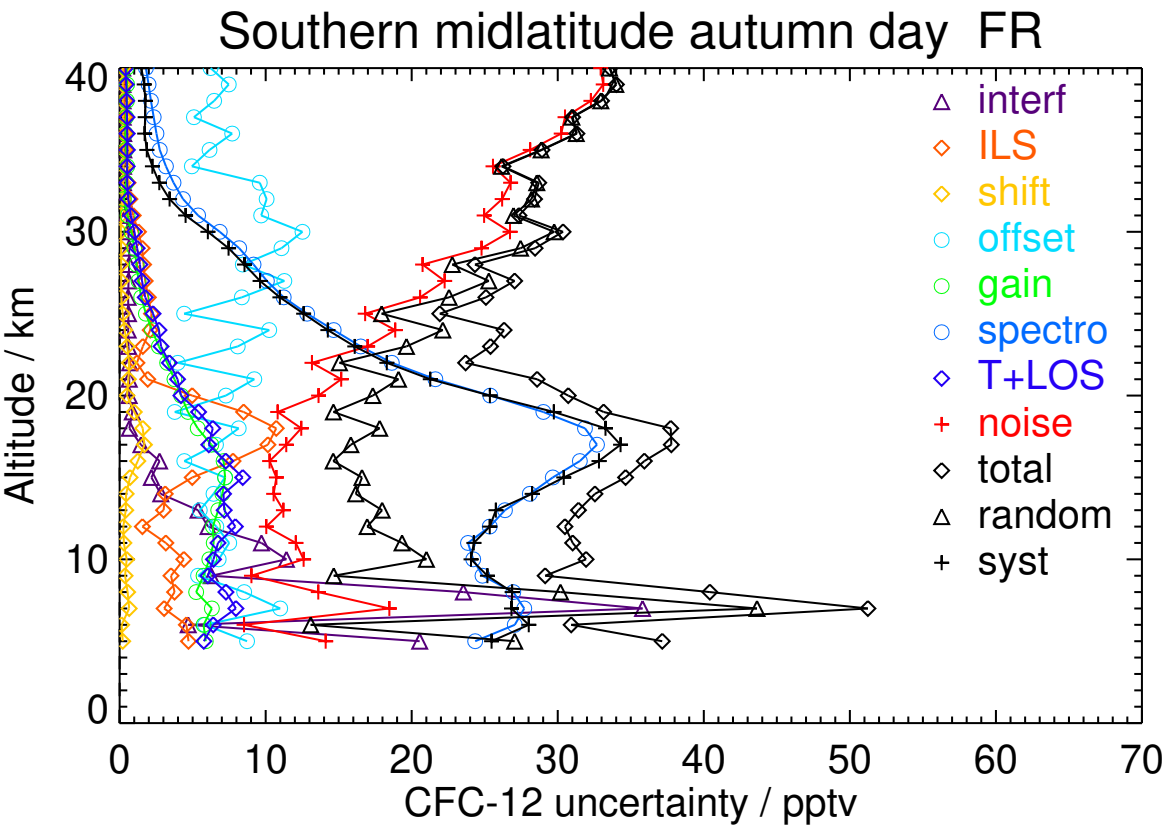

**Figure S25.** V8H\_F-12\_61 Southern midlatitude autumn day

**Table S27.** CFC-12 error budget for Southern midlatitude autumn night. All uncertainties are  $1\sigma$ .

| altitude<br>(km) | mean target<br>(pptv) | interf<br>(pptv) | ILS<br>(pptv) | shift<br>(pptv) | offset<br>(pptv) | gain<br>(pptv) | spectro<br>(pptv) | T+LOS<br>(pptv) | noise<br>(pptv) | random<br>(pptv) | syst<br>(pptv) | total<br>(pptv) |
|------------------|-----------------------|------------------|---------------|-----------------|------------------|----------------|-------------------|-----------------|-----------------|------------------|----------------|-----------------|
| 8                | 537.63                | 10.57            | 4.81          | 0.35            | 6.48             | 5.94           | 24.93             | 6.39            | 9.42            | 18.99            | 24.54          | 31.03           |
| 11               | 532.26                | 8.26             | 3.00          | 0.28            | 8.03             | 6.14           | 24.81             | 7.56            | 11.61           | 19.60            | 24.55          | 31.41           |
| 14               | 516.21                | 1.84             | 2.76          | 0.28            | 7.92             | 7.27           | 27.92             | 7.91            | 11.16           | 17.22            | 28.22          | 33.06           |
| 17               | 443.87                | 0.92             | 11.93         | 1.94            | 8.58             | 6.10           | 37.60             | 6.66            | 12.48           | 18.03            | 39.32          | 43.26           |
| 20               | 318.50                | 0.71             | 3.85          | 0.44            | 9.28             | 4.48           | 26.92             | 4.50            | 14.95           | 19.55            | 26.61          | 33.02           |
| 23               | 213.94                | 0.58             | 1.57          | 0.57            | 9.95             | 2.93           | 17.25             | 3.10            | 18.16           | 21.41            | 17.01          | 27.35           |
| 26               | 143.95                | 0.64             | 2.06          | 0.19            | 9.86             | 1.63           | 13.05             | 2.01            | 21.42           | 23.97            | 12.76          | 27.16           |
| 29               | 74.77                 | 0.83             | 1.57          | 0.15            | 11.34            | 0.97           | 8.89              | 1.34            | 25.12           | 27.89            | 8.18           | 29.07           |
| 32               | 31.54                 | 0.45             | 0.68          | 0.16            | 10.09            | 0.29           | 4.49              | 0.67            | 26.12           | 28.19            | 3.30           | 28.38           |
| 35               | 11.61                 | 0.35             | 0.35          | 0.25            | 6.33             | 0.43           | 2.53              | 0.51            | 27.73           | 28.55            | 1.13           | 28.57           |
| 38               | 11.63                 | 0.36             | 0.26          | 0.26            | 6.43             | 0.58           | 1.95              | 0.48            | 31.82           | 32.50            | 1.32           | 32.53           |
| 41               | 1.16                  | 0.40             | 0.27          | 0.23            | 7.73             | 0.53           | 1.93              | 0.38            | 33.67           | 34.59            | 1.36           | 34.61           |

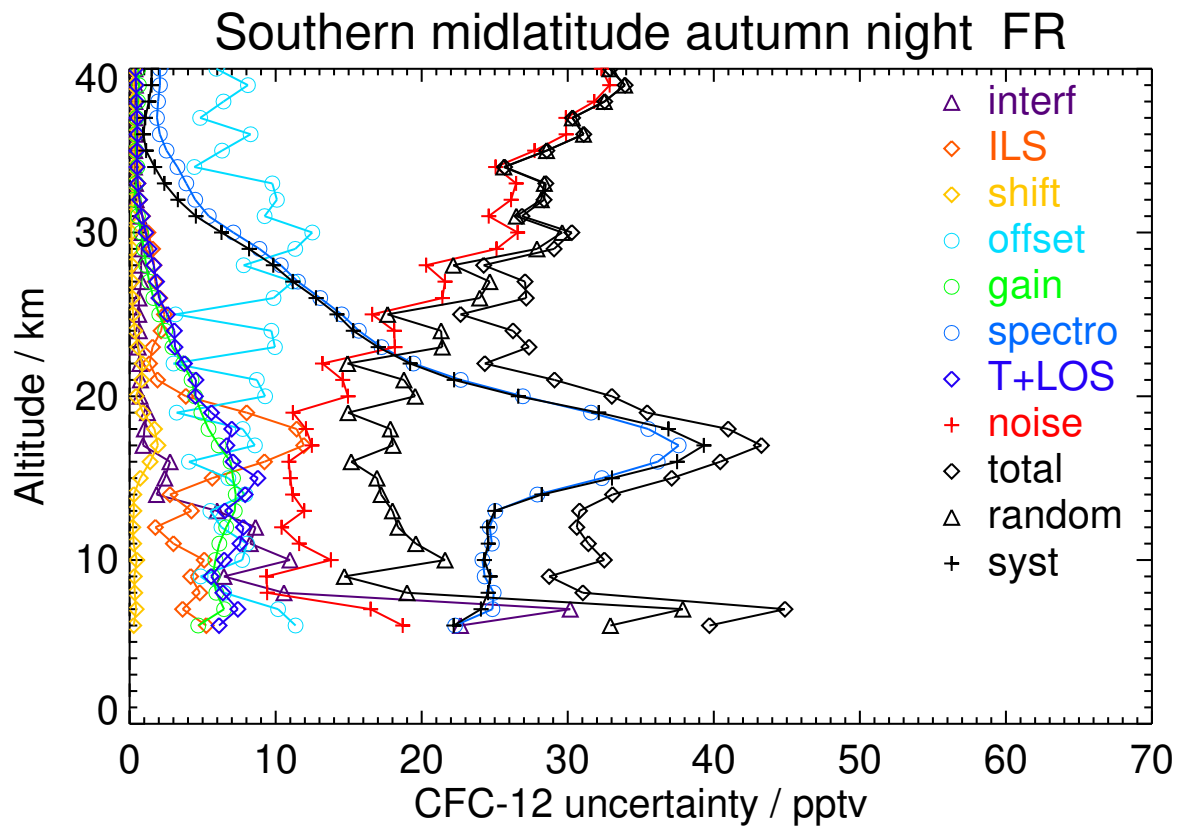

**Figure S26.** V8H\_F-12\_61 Southern midlatitude autumn night

**Table S28.** CFC-12 error budget for Southern polar winter day. All uncertainties are  $1\sigma$ .

| altitude<br>(km) | mean target<br>(pptv) | interf<br>(pptv) | ILS<br>(pptv) | shift<br>(pptv) | offset<br>(pptv) | gain<br>(pptv) | spectro<br>(pptv) | T+LOS<br>(pptv) | noise<br>(pptv) | random<br>(pptv) | syst<br>(pptv) | total<br>(pptv) |
|------------------|-----------------------|------------------|---------------|-----------------|------------------|----------------|-------------------|-----------------|-----------------|------------------|----------------|-----------------|
| 5                | 542.44                | 29.18            | 0.58          | 0.37            | 11.45            | 3.35           | 24.59             | 9.14            | 17.90           | 37.24            | 24.82          | 44.75           |
| 8                | 539.66                | 13.49            | 2.67          | 0.32            | 10.47            | 5.11           | 28.16             | 9.84            | 18.36           | 29.09            | 26.56          | 39.39           |
| 11               | 521.72                | 3.62             | 4.83          | 0.56            | 6.03             | 7.57           | 29.39             | 9.37            | 12.78           | 20.14            | 28.98          | 35.29           |
| 14               | 396.24                | 1.39             | 9.05          | 0.46            | 5.46             | 5.25           | 44.37             | 13.19           | 12.91           | 21.82            | 44.44          | 49.51           |
| 17               | 204.01                | 0.84             | 6.88          | 0.56            | 4.91             | 3.12           | 29.14             | 9.43            | 14.69           | 19.15            | 29.49          | 35.16           |
| 20               | 84.54                 | 0.57             | 3.98          | 0.45            | 5.73             | 1.22           | 16.18             | 4.41            | 18.88           | 21.00            | 15.72          | 26.23           |
| 23               | 22.27                 | 0.50             | 0.97          | 0.12            | 7.12             | 0.46           | 5.92              | 1.47            | 24.09           | 25.52            | 4.33           | 25.88           |
| 26               | 17.49                 | 0.59             | 0.45          | 0.11            | 9.47             | 0.18           | 2.47              | 0.68            | 27.98           | 29.64            | 0.98           | 29.66           |
| 29               | 11.39                 | 0.87             | 0.47          | 0.11            | 13.24            | 0.27           | 2.00              | 0.78            | 31.23           | 34.00            | 0.80           | 34.01           |
| 32               | -0.56                 | 0.67             | 0.41          | 0.12            | 11.53            | 0.19           | 1.58              | 0.75            | 32.64           | 34.66            | 0.62           | 34.67           |
| 35               | -2.70                 | 0.38             | 0.44          | 0.17            | 7.11             | 0.23           | 1.54              | 0.64            | 33.59           | 34.37            | 0.57           | 34.38           |
| 38               | -7.16                 | 0.35             | 0.39          | 0.18            | 6.50             | 0.28           | 1.16              | 0.54            | 36.12           | 36.73            | 0.52           | 36.73           |
| 41               | -2.83                 | 0.35             | 0.43          | 0.15            | 9.04             | 0.31           | 1.10              | 0.55            | 37.84           | 38.92            | 0.60           | 38.93           |

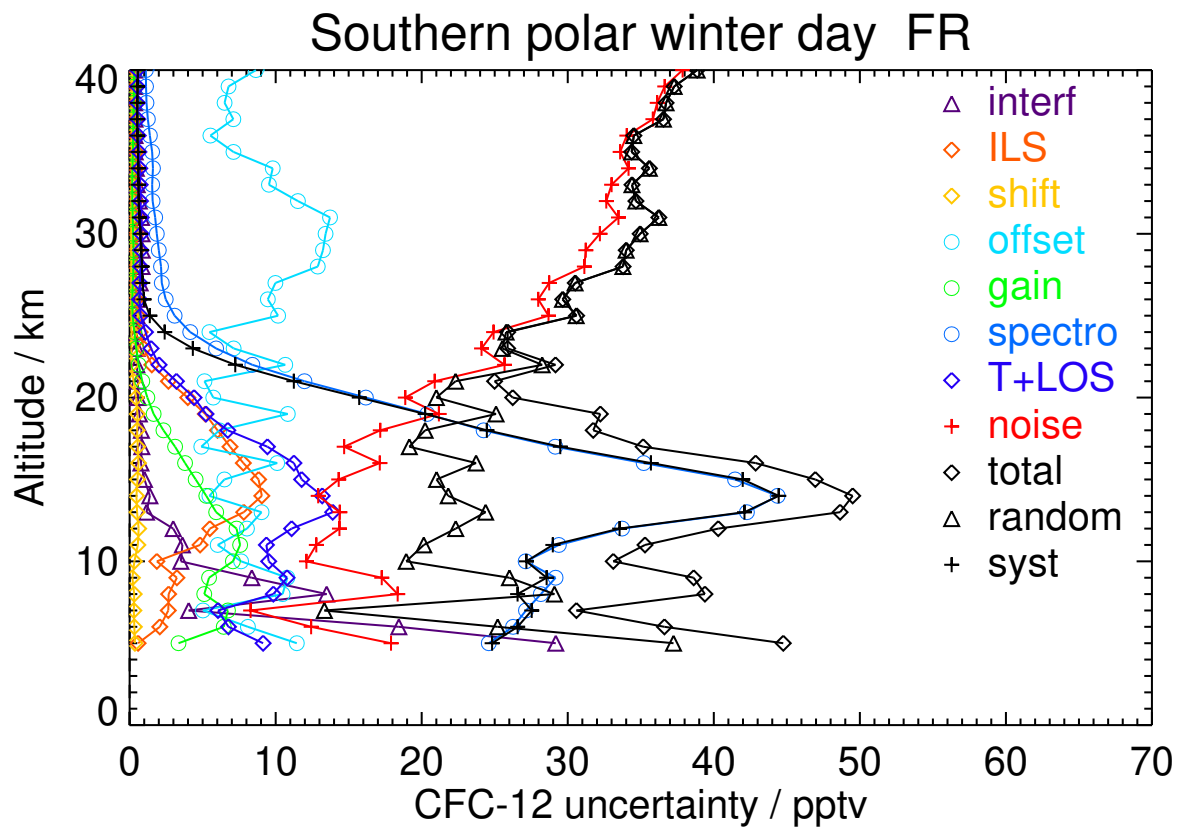

**Figure S27.** V8H\_F-12\_61 Southern polar winter day

**Table S29.** CFC-12 error budget for Southern polar winter night. All uncertainties are  $1\sigma$ .

| altitude<br>(km) | mean target<br>(pptv) | interf<br>(pptv) | ILS<br>(pptv) | shift<br>(pptv) | offset<br>(pptv) | gain<br>(pptv) | spectro<br>(pptv) | T+LOS<br>(pptv) | noise<br>(pptv) | random<br>(pptv) | syst<br>(pptv) | total<br>(pptv) |
|------------------|-----------------------|------------------|---------------|-----------------|------------------|----------------|-------------------|-----------------|-----------------|------------------|----------------|-----------------|
| 5                | 553.66                | 30.24            | 3.03          | 0.33            | 10.58            | 6.93           | 31.23             | 9.94            | 17.67           | 40.92            | 28.19          | 49.69           |
| 8                | 523.51                | 10.19            | 3.92          | 0.21            | 8.16             | 8.26           | 23.05             | 8.04            | 14.61           | 25.01            | 20.94          | 32.61           |
| 11               | 528.47                | 5.64             | 2.42          | 0.28            | 6.37             | 7.59           | 22.50             | 8.74            | 13.03           | 19.83            | 22.25          | 29.81           |
| 14               | 423.88                | 1.75             | 7.57          | 0.66            | 5.25             | 8.14           | 34.77             | 11.12           | 13.02           | 20.12            | 35.39          | 40.71           |
| 17               | 225.63                | 0.89             | 6.62          | 0.41            | 5.04             | 3.57           | 26.12             | 8.21            | 14.26           | 18.21            | 26.54          | 32.18           |
| 20               | 121.87                | 0.54             | 4.03          | 0.37            | 5.55             | 1.50           | 15.98             | 3.89            | 18.27           | 19.99            | 15.94          | 25.57           |
| 23               | 48.29                 | 0.60             | 1.58          | 0.11            | 6.80             | 0.75           | 9.33              | 1.97            | 23.85           | 25.16            | 8.74           | 26.64           |
| 26               | 3.96                  | 0.65             | 0.80          | 0.08            | 9.47             | 0.32           | 4.07              | 0.93            | 28.70           | 30.39            | 2.86           | 30.53           |
| 29               | -5.90                 | 0.79             | 0.47          | 0.10            | 14.29            | 0.17           | 2.23              | 0.73            | 32.93           | 35.98            | 0.50           | 35.99           |
| 32               | 3.25                  | 0.70             | 0.51          | 0.10            | 14.47            | 0.23           | 1.85              | 0.78            | 35.04           | 37.97            | 0.64           | 37.97           |
| 35               | 0.40                  | 0.50             | 0.56          | 0.17            | 9.27             | 0.23           | 1.74              | 0.76            | 35.97           | 37.20            | 0.54           | 37.20           |
| 38               | -1.28                 | 0.49             | 0.64          | 0.20            | 7.74             | 0.27           | 1.80              | 0.66            | 37.86           | 38.69            | 0.55           | 38.70           |
| 41               | -2.83                 | 0.44             | 0.58          | 0.17            | 10.89            | 0.31           | 1.49              | 0.61            | 39.49           | 41.00            | 0.72           | 41.00           |

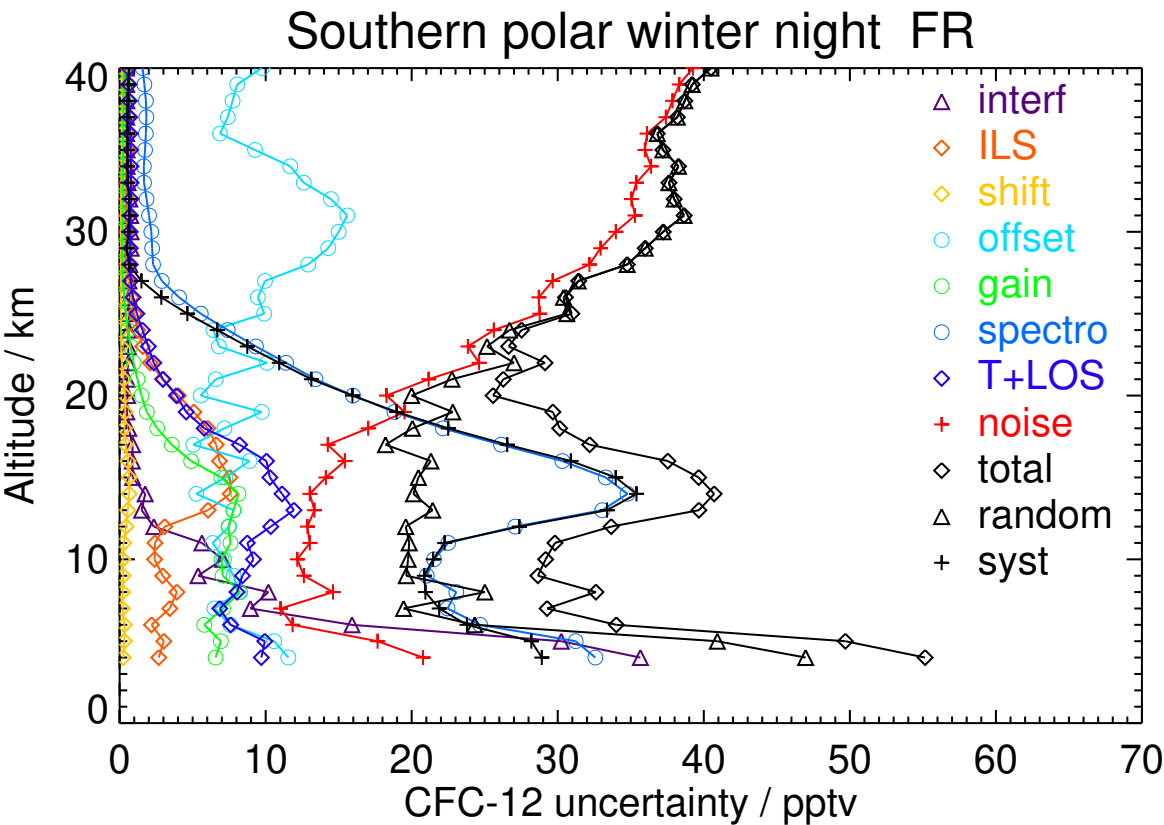

**Figure S28.** V8H\_F-12\_61 Southern polar winter night

**Table S30.** CFC-12 error budget for Southern polar spring day. All uncertainties are  $1\sigma$ .

| altitude<br>(km) | mean target<br>(pptv) | interf<br>(pptv) | ILS<br>(pptv) | shift<br>(pptv) | offset<br>(pptv) | gain<br>(pptv) | spectro<br>(pptv) | T+LOS<br>(pptv) | noise<br>(pptv) | random<br>(pptv) | syst<br>(pptv) | total<br>(pptv) |
|------------------|-----------------------|------------------|---------------|-----------------|------------------|----------------|-------------------|-----------------|-----------------|------------------|----------------|-----------------|
| 8                | 549.22                | 3.59             | 3.43          | 0.38            | 5.61             | 8.50           | 23.63             | 7.46            | 9.90            | 15.96            | 24.20          | 28.99           |
| 11               | 532.17                | 4.67             | 7.37          | 1.37            | 8.63             | 5.92           | 32.59             | 13.50           | 13.52           | 22.81            | 33.08          | 40.18           |
| 14               | 389.03                | 0.98             | 22.84         | 1.42            | 8.89             | 2.70           | 46.53             | 15.04           | 14.49           | 23.69            | 51.49          | 56.68           |
| 17               | 130.75                | 0.76             | 17.41         | 1.36            | 9.77             | 0.66           | 25.50             | 7.10            | 15.76           | 20.55            | 30.46          | 36.75           |
| 20               | 19.38                 | 1.08             | 2.52          | 0.61            | 10.18            | 0.62           | 4.67              | 1.85            | 17.36           | 20.59            | 3.83           | 20.94           |
| 23               | -3.45                 | 1.59             | 1.23          | 0.21            | 10.34            | 0.36           | 2.56              | 0.94            | 19.62           | 22.35            | 2.01           | 22.44           |
| 26               | 11.90                 | 1.47             | 0.96          | 0.23            | 10.98            | 0.29           | 2.42              | 0.73            | 21.83           | 24.60            | 1.36           | 24.64           |
| 29               | 13.72                 | 1.51             | 0.96          | 0.22            | 11.99            | 0.43           | 2.40              | 0.66            | 24.33           | 27.28            | 1.08           | 27.30           |
| 32               | 9.08                  | 0.36             | 0.57          | 0.28            | 9.31             | 0.69           | 1.85              | 0.56            | 22.90           | 24.78            | 1.34           | 24.82           |
| 35               | -1.69                 | 0.23             | 0.30          | 0.35            | 9.11             | 0.85           | 1.01              | 0.44            | 24.93           | 26.56            | 1.04           | 26.58           |
| 38               | 6.88                  | 0.27             | 0.21          | 0.27            | 8.74             | 0.93           | 1.36              | 0.40            | 27.63           | 29.00            | 1.36           | 29.04           |
| 41               | -4.17                 | 0.20             | 0.30          | 0.25            | 8.92             | 1.07           | 1.56              | 0.36            | 31.12           | 32.39            | 1.68           | 32.43           |

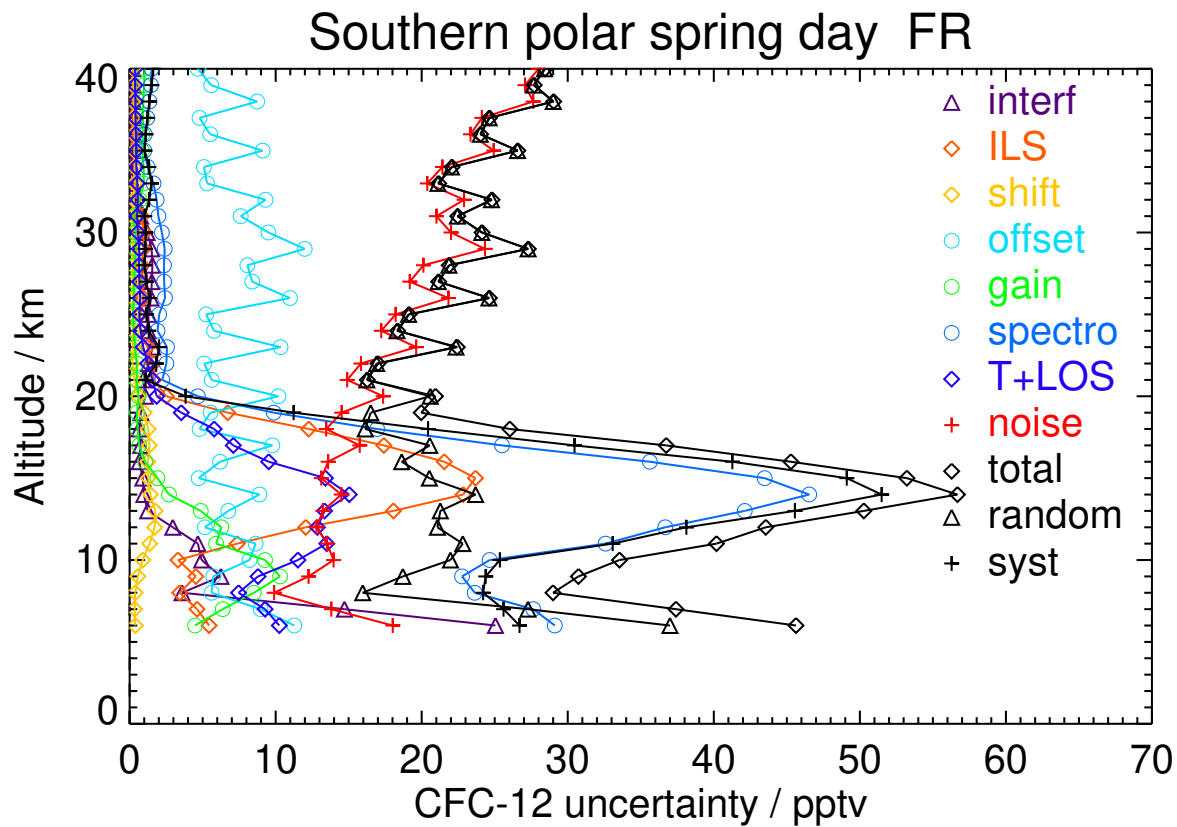

**Figure S29.** V8H\_F-12\_61 Southern polar spring day

**Table S31.** CFC-12 error budget for Southern polar spring night. All uncertainties are  $1\sigma$ .

| altitude<br>(km) | mean target<br>(pptv) | interf<br>(pptv) | ILS<br>(pptv) | shift<br>(pptv) | offset<br>(pptv) | gain<br>(pptv) | spectro<br>(pptv) | T+LOS<br>(pptv) | noise<br>(pptv) | random<br>(pptv) | syst<br>(pptv) | total<br>(pptv) |
|------------------|-----------------------|------------------|---------------|-----------------|------------------|----------------|-------------------|-----------------|-----------------|------------------|----------------|-----------------|
| 8                | 546.34                | 4.97             | 2.67          | 0.30            | 5.04             | 7.65           | 21.27             | 6.63            | 9.38            | 14.83            | 21.92          | 26.46           |
| 11               | 527.80                | 6.55             | 4.22          | 0.53            | 7.53             | 6.29           | 29.73             | 11.47           | 11.90           | 20.74            | 29.73          | 36.25           |
| 14               | 392.67                | 1.83             | 17.33         | 0.93            | 7.72             | 4.62           | 41.34             | 12.93           | 12.54           | 23.63            | 43.14          | 49.19           |
| 17               | 190.98                | 1.14             | 12.40         | 1.50            | 8.47             | 2.42           | 24.17             | 7.43            | 13.97           | 20.66            | 25.35          | 32.70           |
| 20               | 96.18                 | 0.86             | 5.22          | 1.06            | 9.45             | 1.59           | 11.19             | 2.63            | 16.44           | 20.80            | 9.51           | 22.87           |
| 23               | 76.80                 | 1.25             | 1.33          | 0.34            | 10.41            | 1.21           | 7.08              | 1.43            | 19.49           | 23.08            | 3.59           | 23.36           |
| 26               | 76.20                 | 1.51             | 1.45          | 0.31            | 11.46            | 1.64           | 8.81              | 1.29            | 22.10           | 26.24            | 4.18           | 26.58           |
| 29               | 48.98                 | 1.56             | 1.94          | 0.28            | 12.38            | 1.02           | 8.39              | 1.20            | 25.04           | 29.05            | 3.93           | 29.32           |
| 32               | 14.99                 | 0.34             | 0.89          | 0.31            | 9.46             | 0.63           | 3.71              | 0.67            | 23.58           | 25.62            | 2.18           | 25.71           |
| 35               | 6.16                  | 0.28             | 0.39          | 0.32            | 8.93             | 0.73           | 1.60              | 0.47            | 25.69           | 27.25            | 1.12           | 27.27           |
| 38               | -2.85                 | 0.25             | 0.30          | 0.27            | 8.24             | 0.77           | 1.68              | 0.40            | 28.43           | 29.63            | 1.41           | 29.66           |
| 41               | -9.63                 | 0.20             | 0.36          | 0.22            | 8.37             | 0.85           | 1.58              | 0.34            | 31.39           | 32.51            | 1.37           | 32.54           |

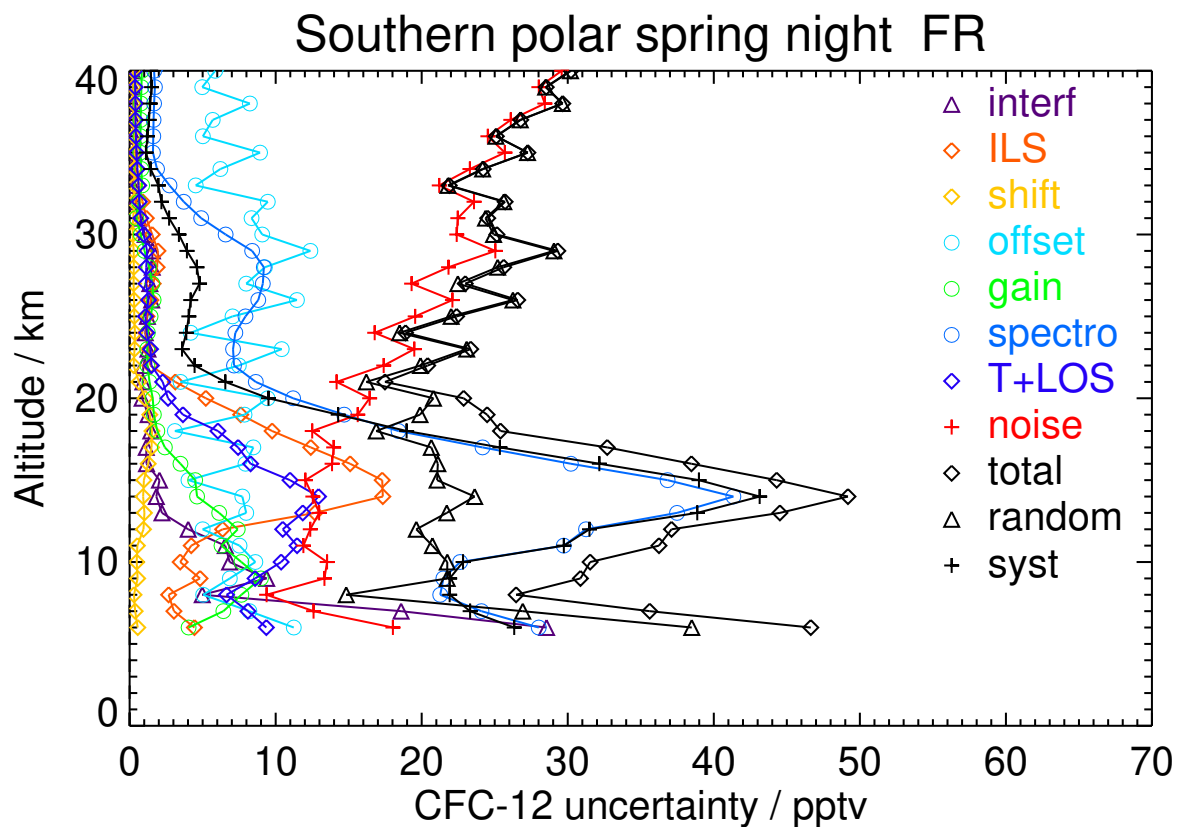

**Figure S30.** V8H\_F-12\_61 Southern polar spring night



**Table S32.** CFC-12 error budget for Southern polar summer day. All uncertainties are  $1\sigma$ .

| altitude<br>(km) | mean target<br>(pptv) | interf<br>(pptv) | ILS<br>(pptv) | shift<br>(pptv) | offset<br>(pptv) | gain<br>(pptv) | spectro<br>(pptv) | T+LOS<br>(pptv) | noise<br>(pptv) | random<br>(pptv) | syst<br>(pptv) | total<br>(pptv) |
|------------------|-----------------------|------------------|---------------|-----------------|------------------|----------------|-------------------|-----------------|-----------------|------------------|----------------|-----------------|
| 5                | 547.47                | 34.21            | 3.43          | 0.56            | 10.00            | 6.21           | 23.61             | 7.83            | 18.85           | 41.57            | 23.82          | 47.91           |
| 8                | 534.54                | 10.27            | 2.28          | 0.59            | 4.95             | 6.32           | 26.04             | 6.47            | 11.34           | 18.20            | 26.32          | 32.00           |
| 11               | 490.35                | 5.71             | 2.98          | 0.23            | 4.97             | 6.07           | 22.61             | 6.95            | 10.80           | 15.67            | 23.10          | 27.91           |
| 14               | 447.74                | 2.86             | 3.04          | 0.23            | 4.64             | 6.09           | 26.42             | 7.20            | 10.06           | 14.09            | 26.99          | 30.45           |
| 17               | 369.99                | 2.04             | 8.90          | 0.79            | 4.37             | 5.11           | 26.15             | 7.11            | 9.68            | 13.59            | 27.80          | 30.94           |
| 20               | 260.15                | 1.49             | 8.66          | 1.52            | 4.71             | 3.58           | 20.72             | 4.55            | 10.90           | 13.59            | 22.33          | 26.14           |
| 23               | 170.39                | 0.81             | 0.96          | 0.98            | 5.64             | 2.49           | 13.12             | 2.59            | 13.71           | 15.37            | 13.08          | 20.18           |
| 26               | 114.48                | 1.07             | 1.89          | 0.31            | 7.67             | 1.48           | 9.17              | 1.65            | 17.38           | 19.26            | 9.14           | 21.32           |
| 29               | 69.77                 | 1.39             | 1.05          | 0.14            | 9.48             | 0.72           | 5.64              | 1.06            | 21.71           | 23.83            | 5.45           | 24.44           |
| 32               | 41.96                 | 0.35             | 0.67          | 0.31            | 7.40             | 0.65           | 3.53              | 0.60            | 20.77           | 22.13            | 3.20           | 22.36           |
| 35               | 14.88                 | 0.25             | 0.36          | 0.29            | 7.59             | 0.60           | 2.04              | 0.43            | 23.73           | 24.97            | 1.52           | 25.01           |
| 38               | 12.65                 | 0.20             | 0.24          | 0.25            | 7.38             | 0.78           | 1.58              | 0.46            | 26.86           | 27.87            | 1.49           | 27.91           |
| 41               | -4.93                 | 0.40             | 0.43          | 0.26            | 7.74             | 1.11           | 1.79              | 0.37            | 29.04           | 30.07            | 1.91           | 30.13           |

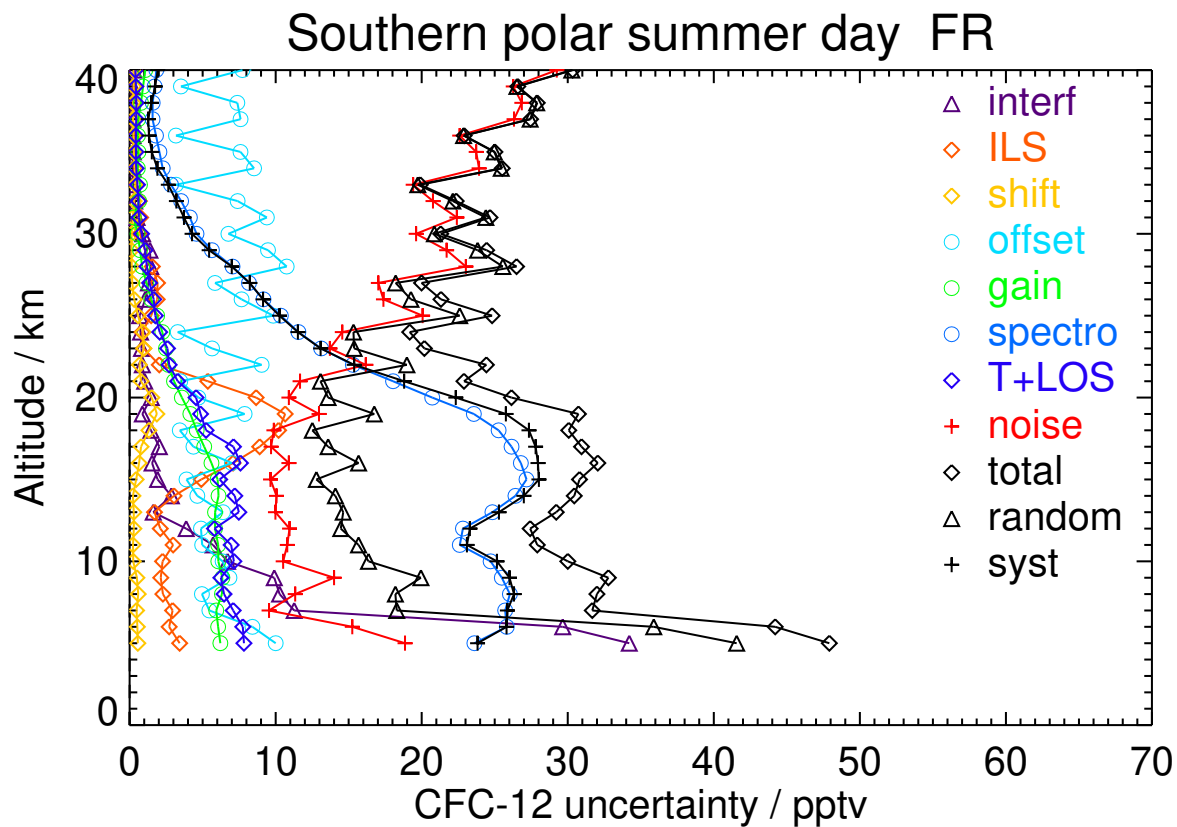

**Figure S31.** V8H\_F-12\_61 Southern polar summer day

**Table S33.** CFC-12 error budget for Southern polar summer night. All uncertainties are  $1\sigma$ .

| altitude<br>(km) | mean target<br>(pptv) | interf<br>(pptv) | ILS<br>(pptv) | shift<br>(pptv) | offset<br>(pptv) | gain<br>(pptv) | spectro<br>(pptv) | T+LOS<br>(pptv) | noise<br>(pptv) | random<br>(pptv) | syst<br>(pptv) | total<br>(pptv) |
|------------------|-----------------------|------------------|---------------|-----------------|------------------|----------------|-------------------|-----------------|-----------------|------------------|----------------|-----------------|
| 5                | 535.30                | 10.35            | 5.27          | 0.11            | 9.74             | 4.52           | 20.83             | 6.62            | 17.33           | 23.38            | 21.94          | 32.07           |
| 8                | 543.36                | 36.22            | 2.41          | 0.60            | 10.17            | 4.54           | 29.32             | 9.65            | 20.13           | 44.20            | 29.09          | 52.92           |
| 11               | 500.56                | 14.02            | 4.42          | 0.20            | 6.65             | 6.92           | 21.13             | 6.61            | 14.04           | 22.67            | 21.94          | 31.55           |
| 14               | 467.81                | 4.70             | 2.93          | 0.35            | 4.46             | 5.47           | 29.04             | 6.87            | 10.97           | 14.90            | 29.49          | 33.04           |
| 17               | 386.98                | 3.29             | 8.46          | 1.38            | 3.43             | 5.67           | 27.50             | 6.10            | 10.14           | 13.33            | 29.10          | 32.01           |
| 20               | 265.07                | 0.99             | 6.98          | 0.87            | 3.01             | 3.71           | 23.19             | 4.21            | 11.29           | 12.98            | 24.24          | 27.50           |
| 23               | 177.21                | 0.88             | 0.73          | 0.85            | 3.08             | 2.82           | 14.11             | 2.55            | 14.21           | 15.07            | 14.14          | 20.66           |
| 26               | 104.87                | 0.70             | 2.05          | 0.19            | 3.41             | 1.44           | 10.42             | 1.79            | 17.84           | 18.43            | 10.44          | 21.18           |
| 29               | 49.05                 | 1.08             | 1.06          | 0.09            | 8.09             | 0.41           | 5.55              | 1.05            | 21.72           | 23.32            | 5.30           | 23.91           |
| 32               | 22.46                 | 0.70             | 0.34          | 0.12            | 8.99             | 0.31           | 2.29              | 0.45            | 24.20           | 25.87            | 1.79           | 25.93           |
| 35               | 7.40                  | 0.15             | 0.30          | 0.34            | 4.25             | 0.61           | 1.79              | 0.42            | 23.71           | 24.13            | 1.33           | 24.17           |
| 38               | -6.00                 | 0.18             | 0.18          | 0.28            | 4.48             | 0.62           | 1.09              | 0.41            | 27.76           | 28.13            | 1.03           | 28.15           |
| 41               | -2.52                 | 0.18             | 0.22          | 0.18            | 5.29             | 0.76           | 1.30              | 0.41            | 29.71           | 30.19            | 1.31           | 30.22           |

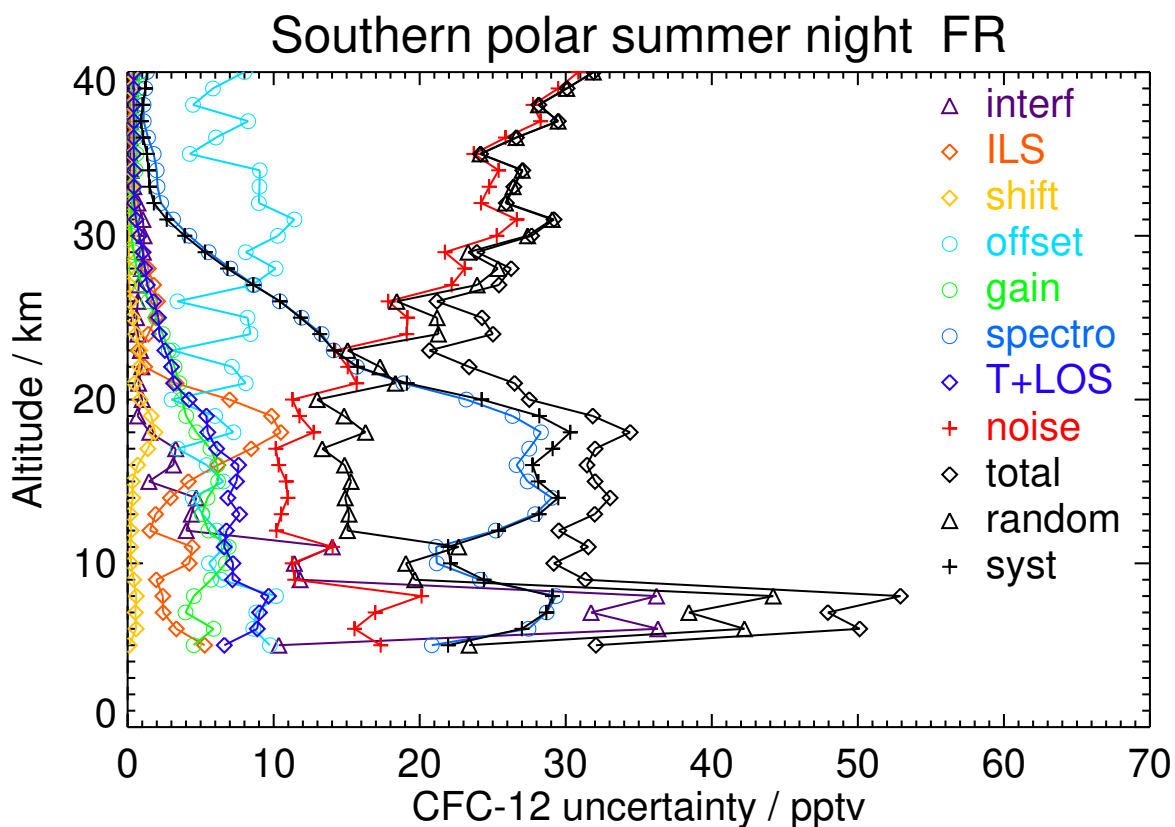**Figure S32.** V8H\_F-12\_61 Southern polar summer night

**Table S34.** CFC-12 error budget for Southern polar autumn day. All uncertainties are  $1\sigma$ .

| altitude<br>(km) | mean target<br>(pptv) | interf<br>(pptv) | ILS<br>(pptv) | shift<br>(pptv) | offset<br>(pptv) | gain<br>(pptv) | spectro<br>(pptv) | T+LOS<br>(pptv) | noise<br>(pptv) | random<br>(pptv) | syst<br>(pptv) | total<br>(pptv) |
|------------------|-----------------------|------------------|---------------|-----------------|------------------|----------------|-------------------|-----------------|-----------------|------------------|----------------|-----------------|
| 5                | 530.53                | 18.50            | 4.02          | 0.31            | 8.51             | 7.81           | 26.34             | 5.90            | 13.02           | 25.04            | 27.62          | 37.28           |
| 8                | 534.94                | 17.99            | 1.69          | 0.65            | 8.35             | 5.80           | 27.16             | 7.69            | 13.25           | 26.24            | 26.72          | 37.45           |
| 11               | 504.94                | 5.51             | 2.26          | 0.35            | 7.11             | 6.25           | 24.80             | 6.40            | 10.57           | 16.40            | 24.98          | 29.88           |
| 14               | 459.98                | 1.43             | 4.05          | 0.58            | 7.03             | 7.51           | 30.13             | 7.42            | 10.40           | 15.15            | 31.08          | 34.58           |
| 17               | 326.77                | 0.86             | 9.22          | 1.33            | 7.80             | 5.58           | 31.27             | 5.72            | 12.04           | 16.11            | 32.80          | 36.54           |
| 20               | 201.20                | 0.53             | 3.40          | 0.28            | 8.67             | 3.33           | 19.55             | 3.16            | 15.20           | 18.32            | 19.64          | 26.86           |
| 23               | 118.58                | 0.55             | 1.17          | 0.14            | 9.07             | 1.87           | 12.11             | 1.97            | 19.24           | 21.65            | 11.81          | 24.66           |
| 26               | 59.25                 | 0.47             | 1.35          | 0.10            | 8.55             | 0.78           | 7.33              | 1.12            | 22.75           | 24.44            | 7.17           | 25.47           |
| 29               | 30.25                 | 0.53             | 0.78          | 0.04            | 11.84            | 0.30           | 4.08              | 0.68            | 27.31           | 29.87            | 3.45           | 30.06           |
| 32               | 4.78                  | 0.33             | 0.42          | 0.10            | 11.17            | 0.14           | 2.21              | 0.49            | 29.50           | 31.60            | 1.40           | 31.63           |
| 35               | -6.00                 | 0.15             | 0.25          | 0.18            | 5.97             | 0.17           | 1.32              | 0.51            | 31.32           | 31.91            | 0.60           | 31.92           |
| 38               | -9.80                 | 0.17             | 0.24          | 0.19            | 6.86             | 0.23           | 1.21              | 0.47            | 35.65           | 36.32            | 0.62           | 36.32           |
| 41               | 3.39                  | 0.39             | 0.24          | 0.15            | 10.10            | 0.26           | 1.20              | 0.37            | 38.53           | 39.85            | 0.69           | 39.86           |

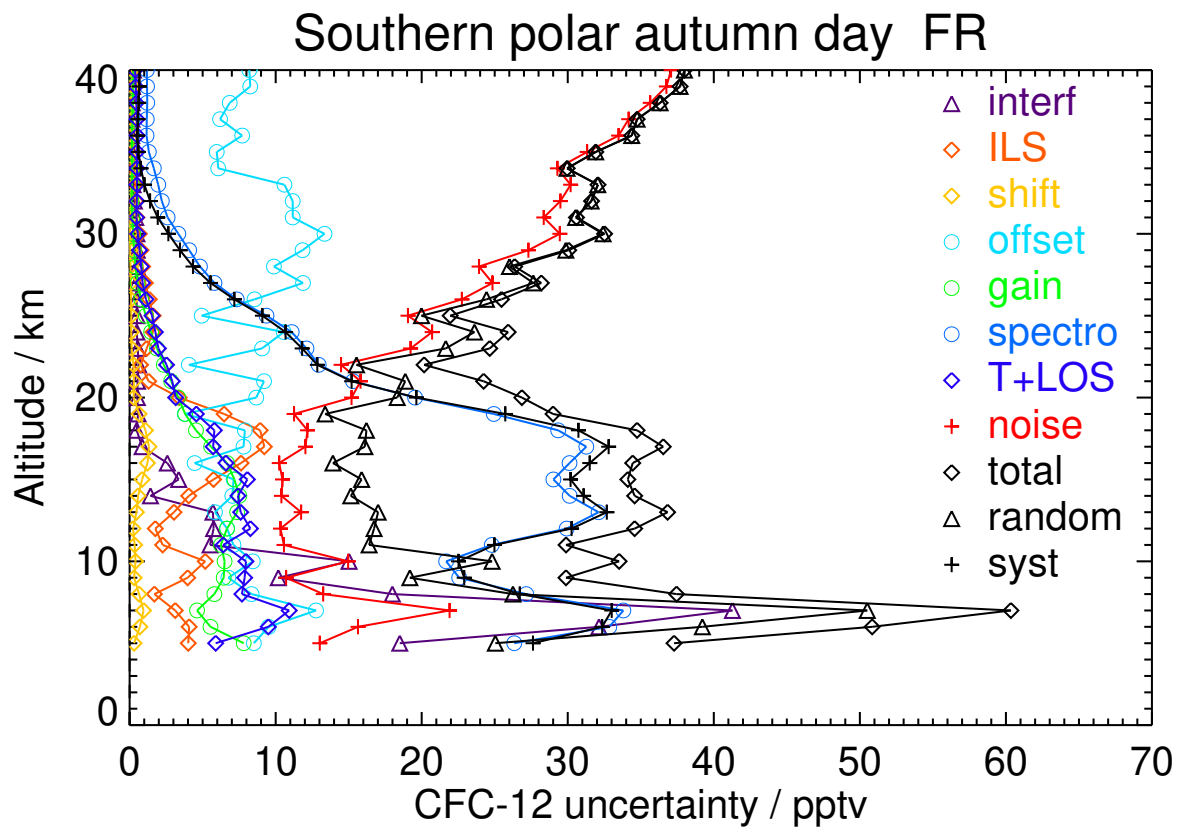

**Figure S33.** V8H\_F-12\_61 Southern polar autumn day

Table S35. CFC-12 error budget for Southern polar autumn night. All uncertainties are  $1\sigma$ .

| altitude<br>(km) | mean target<br>(pptv) | interf<br>(pptv) | ILS<br>(pptv) | shift<br>(pptv) | offset<br>(pptv) | gain<br>(pptv) | spectro<br>(pptv) | T+LOS<br>(pptv) | noise<br>(pptv) | random<br>(pptv) | syst<br>(pptv) | total<br>(pptv) |
|------------------|-----------------------|------------------|---------------|-----------------|------------------|----------------|-------------------|-----------------|-----------------|------------------|----------------|-----------------|
| 5                | 535.07                | 20.74            | 4.41          | 0.30            | 9.00             | 6.30           | 22.87             | 7.23            | 13.51           | 28.44            | 22.80          | 36.45           |
| 8                | 536.84                | 18.71            | 2.32          | 0.62            | 8.76             | 6.06           | 28.28             | 7.48            | 14.84           | 27.97            | 27.62          | 39.31           |
| 11               | 507.09                | 7.08             | 3.76          | 0.33            | 7.01             | 5.89           | 22.62             | 6.46            | 11.90           | 18.55            | 22.35          | 29.04           |
| 14               | 459.00                | 2.19             | 3.55          | 0.61            | 5.97             | 7.41           | 29.84             | 7.12            | 10.91           | 15.28            | 30.58          | 34.19           |
| 17               | 335.39                | 1.21             | 8.56          | 1.20            | 5.92             | 5.62           | 30.05             | 6.00            | 11.83           | 15.55            | 31.30          | 34.95           |
| 20               | 201.32                | 0.80             | 4.80          | 0.50            | 5.84             | 3.23           | 20.99             | 3.71            | 14.57           | 16.55            | 21.47          | 27.11           |
| 23               | 109.82                | 0.75             | 1.04          | 0.14            | 5.73             | 1.80           | 12.16             | 2.14            | 18.45           | 19.82            | 11.73          | 23.03           |
| 26               | 48.63                 | 0.49             | 1.28          | 0.12            | 6.19             | 0.79           | 7.27              | 1.24            | 22.60           | 23.68            | 6.72           | 24.62           |
| 29               | 16.12                 | 0.48             | 0.65          | 0.05            | 11.58            | 0.26           | 3.57              | 0.71            | 27.79           | 30.22            | 2.59           | 30.34           |
| 32               | 5.41                  | 0.37             | 0.32          | 0.08            | 12.03            | 0.12           | 1.82              | 0.48            | 31.30           | 33.57            | 0.90           | 33.58           |
| 35               | 7.66                  | 0.28             | 0.42          | 0.16            | 6.25             | 0.15           | 2.01              | 0.52            | 33.07           | 33.71            | 0.88           | 33.73           |
| 38               | 4.65                  | 0.38             | 0.50          | 0.19            | 7.72             | 0.16           | 1.91              | 0.54            | 37.27           | 38.11            | 0.93           | 38.12           |
| 41               | 0.90                  | 0.71             | 0.33          | 0.14            | 11.58            | 0.26           | 1.43              | 0.53            | 40.22           | 41.88            | 0.86           | 41.89           |

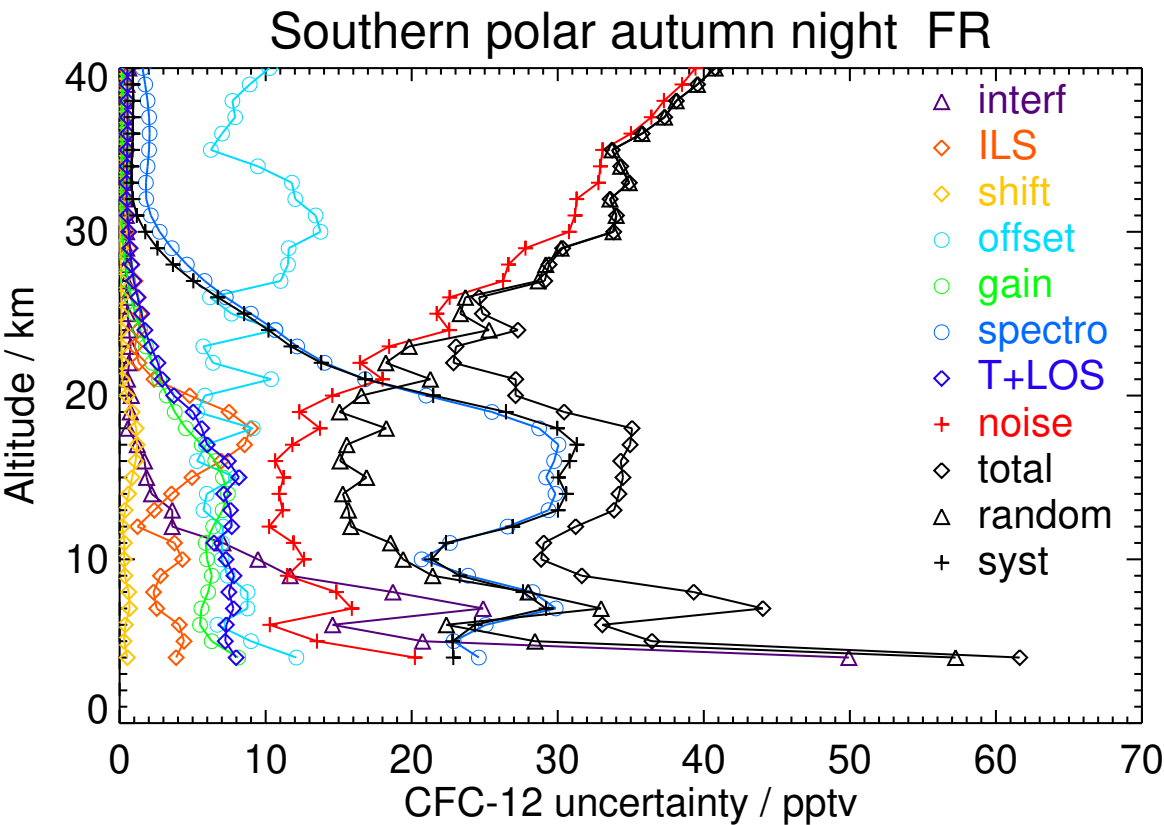

Figure S34. V8H\_F-12\_61 Southern polar autumn night

**Table S36.** CFC-12 error budget for Northern polar winter day. All uncertainties are  $1\sigma$ .

| altitude<br>(km) | mean target<br>(pptv) | interf<br>(pptv) | ILS<br>(pptv) | shift<br>(pptv) | offset<br>(pptv) | gain<br>(pptv) | spectro<br>(pptv) | T+LOS<br>(pptv) | noise<br>(pptv) | random<br>(pptv) | syst<br>(pptv) | total<br>(pptv) |
|------------------|-----------------------|------------------|---------------|-----------------|------------------|----------------|-------------------|-----------------|-----------------|------------------|----------------|-----------------|
| 8                | 543.36                | 15.94            | 4.29          | 0.47            | 2.52             | 4.89           | 25.37             | 11.54           | 15.46           | 26.08            | 25.27          | 36.32           |
| 11               | 496.28                | 3.41             | 3.72          | 0.40            | 3.08             | 6.45           | 30.08             | 8.34            | 12.32           | 17.22            | 30.11          | 34.69           |
| 14               | 406.99                | 1.16             | 10.35         | 0.59            | 3.77             | 5.58           | 30.67             | 7.14            | 13.64           | 19.66            | 30.74          | 36.49           |
| 17               | 299.52                | 1.18             | 6.41          | 0.36            | 2.99             | 4.69           | 24.20             | 4.96            | 14.35           | 19.66            | 22.44          | 29.83           |
| 20               | 251.55                | 0.86             | 4.94          | 0.33            | 1.34             | 3.99           | 19.92             | 3.15            | 15.17           | 21.10            | 15.31          | 26.07           |
| 23               | 204.68                | 0.82             | 3.14          | 0.16            | 3.08             | 3.61           | 15.30             | 1.65            | 17.69           | 19.56            | 14.15          | 24.14           |
| 26               | 148.74                | 1.03             | 1.91          | 0.14            | 3.14             | 1.99           | 12.76             | 1.34            | 19.80           | 21.07            | 11.45          | 23.98           |
| 29               | 98.41                 | 0.75             | 1.50          | 0.32            | 5.80             | 1.29           | 9.45              | 0.82            | 23.38           | 24.54            | 8.53           | 25.98           |
| 32               | 51.69                 | 0.29             | 1.44          | 0.35            | 5.63             | 0.65           | 7.53              | 0.64            | 25.06           | 26.24            | 5.60           | 26.83           |
| 35               | 14.62                 | 0.24             | 0.76          | 0.36            | 5.89             | 0.39           | 3.82              | 0.46            | 29.68           | 30.41            | 2.58           | 30.52           |
| 38               | 7.04                  | 0.38             | 0.53          | 0.39            | 5.61             | 0.33           | 2.35              | 0.42            | 34.84           | 35.34            | 1.69           | 35.38           |
| 41               | 2.04                  | 0.46             | 0.51          | 0.45            | 8.93             | 0.27           | 2.21              | 0.46            | 40.11           | 41.13            | 1.60           | 41.16           |

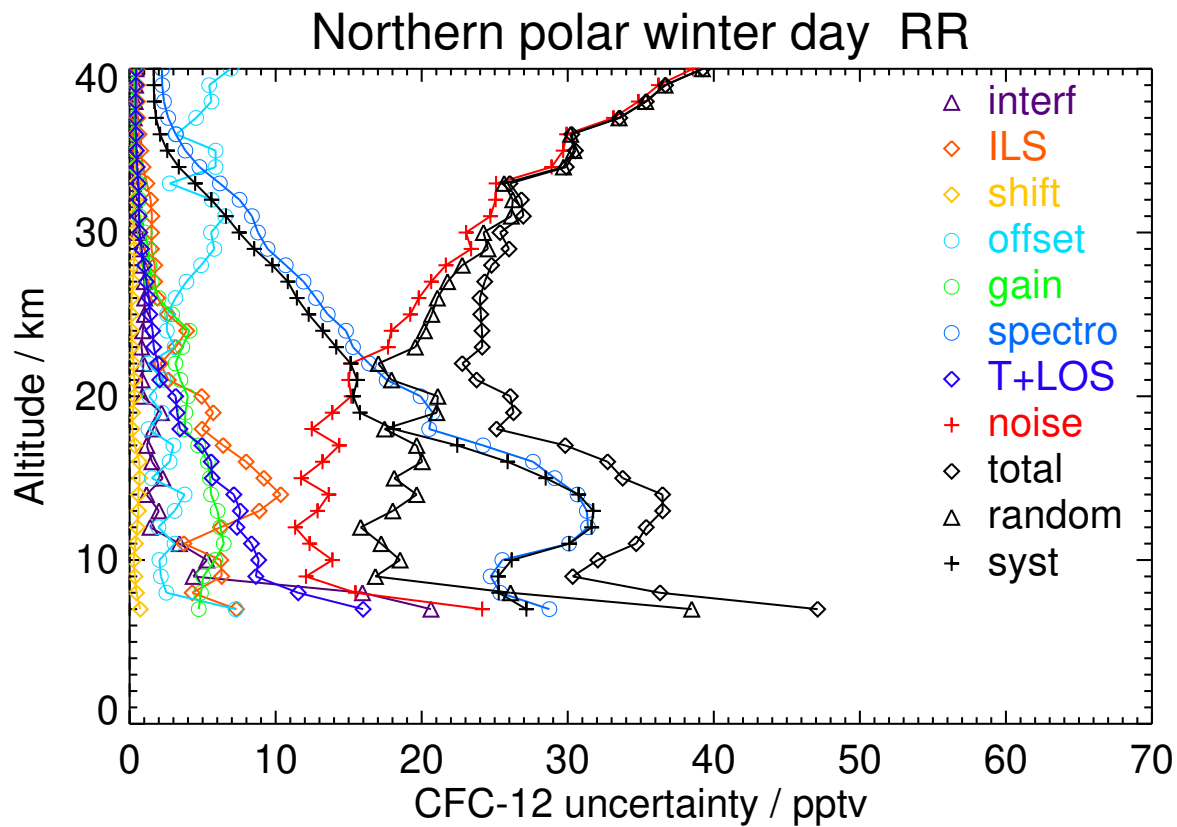

**Figure S35.** V8R\_F-12\_261 Northern polar winter day

**Table S37.** CFC-12 error budget for Northern polar winter night. All uncertainties are  $1\sigma$ .

| altitude<br>(km) | mean target<br>(pptv) | interf<br>(pptv) | ILS<br>(pptv) | shift<br>(pptv) | offset<br>(pptv) | gain<br>(pptv) | spectro<br>(pptv) | T+LOS<br>(pptv) | noise<br>(pptv) | random<br>(pptv) | syst<br>(pptv) | total<br>(pptv) |
|------------------|-----------------------|------------------|---------------|-----------------|------------------|----------------|-------------------|-----------------|-----------------|------------------|----------------|-----------------|
| 8                | 539.08                | 10.64            | 4.01          | 0.42            | 2.55             | 5.80           | 24.88             | 10.49           | 14.36           | 21.79            | 25.10          | 33.24           |
| 11               | 522.16                | 2.04             | 4.93          | 0.30            | 2.50             | 6.41           | 26.67             | 8.84            | 12.89           | 18.44            | 26.30          | 32.12           |
| 14               | 436.06                | 1.62             | 9.32          | 0.46            | 3.54             | 5.58           | 31.13             | 7.80            | 14.38           | 19.22            | 31.63          | 37.01           |
| 17               | 299.23                | 1.14             | 8.06          | 0.31            | 2.59             | 3.80           | 25.70             | 5.72            | 14.83           | 17.87            | 26.10          | 31.63           |
| 20               | 180.39                | 0.87             | 5.82          | 0.23            | 1.56             | 3.20           | 16.97             | 2.83            | 15.25           | 17.85            | 16.04          | 24.00           |
| 23               | 123.02                | 0.79             | 2.05          | 0.25            | 3.41             | 2.15           | 11.83             | 1.25            | 19.59           | 21.70            | 8.69           | 23.37           |
| 26               | 91.85                 | 1.67             | 1.73          | 0.12            | 2.37             | 1.81           | 8.06              | 0.92            | 18.83           | 20.00            | 5.94           | 20.86           |
| 29               | 79.09                 | 1.05             | 1.54          | 0.40            | 5.30             | 0.66           | 6.85              | 0.70            | 22.69           | 23.80            | 5.32           | 24.38           |
| 32               | 46.09                 | 1.12             | 1.30          | 0.50            | 6.62             | 0.48           | 5.07              | 0.59            | 24.44           | 25.57            | 4.08           | 25.90           |
| 35               | -3.61                 | 0.33             | 0.51          | 0.46            | 4.89             | 0.78           | 2.70              | 0.36            | 24.37           | 24.93            | 2.19           | 25.03           |
| 38               | 0.46                  | 0.42             | 0.28          | 0.41            | 5.24             | 0.75           | 1.38              | 0.39            | 28.30           | 28.81            | 1.19           | 28.83           |
| 41               | -7.69                 | 0.51             | 0.21          | 0.41            | 5.55             | 0.61           | 1.52              | 0.35            | 32.71           | 33.21            | 1.12           | 33.23           |

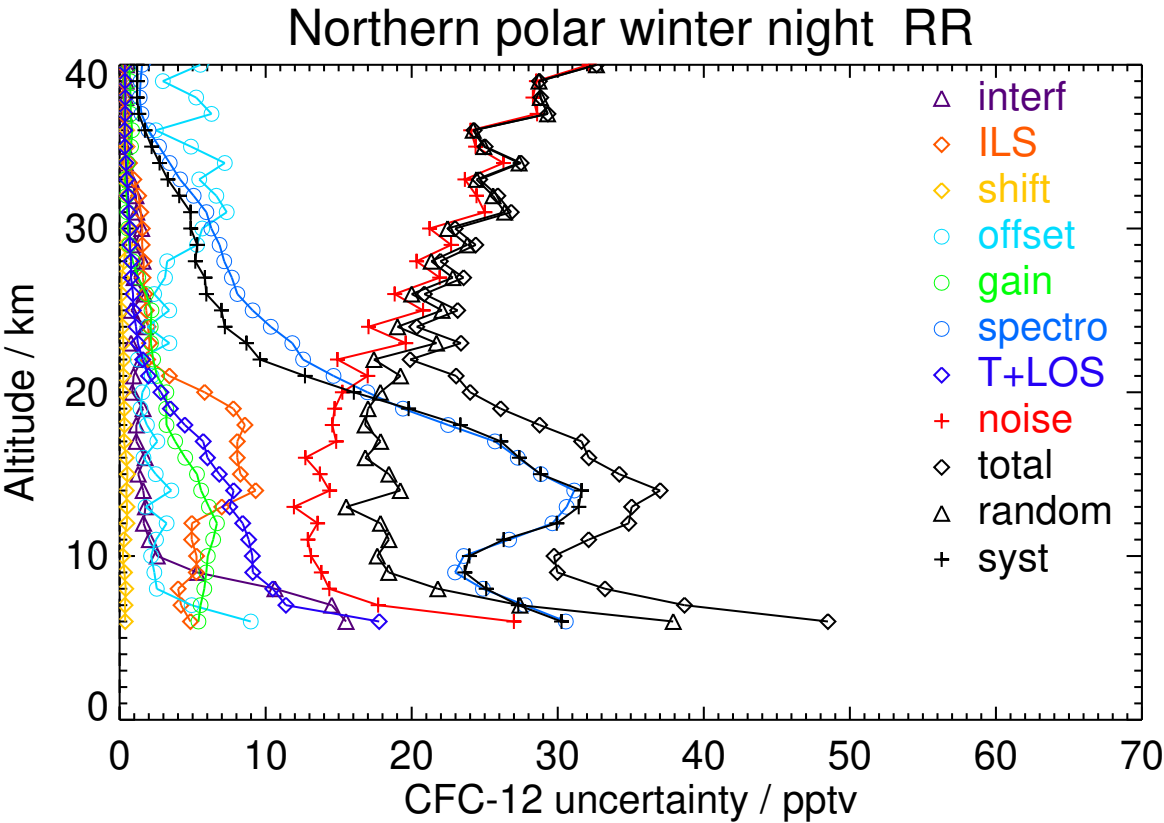

**Figure S36.** V8R\_F-12\_261 Northern polar winter night

**Table S38.** CFC-12 error budget for Northern polar spring day. All uncertainties are  $1\sigma$ .

| altitude<br>(km) | mean target<br>(pptv) | interf<br>(pptv) | ILS<br>(pptv) | shift<br>(pptv) | offset<br>(pptv) | gain<br>(pptv) | spectro<br>(pptv) | T+LOS<br>(pptv) | noise<br>(pptv) | random<br>(pptv) | syst<br>(pptv) | total<br>(pptv) |
|------------------|-----------------------|------------------|---------------|-----------------|------------------|----------------|-------------------|-----------------|-----------------|------------------|----------------|-----------------|
| 8                | 522.37                | 15.35            | 3.73          | 0.43            | 4.77             | 4.58           | 25.70             | 13.59           | 18.71           | 29.70            | 24.63          | 38.58           |
| 11               | 478.22                | 2.53             | 1.93          | 0.27            | 2.05             | 5.60           | 25.25             | 7.22            | 11.44           | 14.53            | 25.60          | 29.44           |
| 14               | 427.61                | 1.50             | 6.66          | 0.48            | 1.95             | 6.56           | 29.80             | 6.54            | 11.98           | 14.97            | 30.72          | 34.18           |
| 17               | 314.91                | 0.58             | 5.76          | 0.32            | 1.59             | 5.00           | 24.06             | 4.70            | 13.27           | 15.22            | 24.63          | 28.95           |
| 20               | 225.78                | 0.57             | 3.02          | 0.27            | 1.77             | 3.19           | 18.30             | 2.69            | 15.16           | 16.02            | 18.39          | 24.39           |
| 23               | 174.34                | 0.54             | 1.53          | 0.16            | 2.58             | 1.73           | 12.90             | 1.55            | 19.61           | 20.07            | 12.77          | 23.78           |
| 26               | 126.47                | 0.49             | 2.19          | 0.09            | 2.82             | 1.37           | 11.48             | 1.23            | 22.41           | 22.73            | 11.56          | 25.50           |
| 29               | 67.21                 | 0.46             | 2.16          | 0.32            | 6.70             | 0.81           | 8.11              | 0.87            | 26.14           | 27.11            | 8.08           | 28.29           |
| 32               | 26.81                 | 0.47             | 1.06          | 0.21            | 7.54             | 0.33           | 4.03              | 0.46            | 30.10           | 31.09            | 3.69           | 31.31           |
| 35               | 5.17                  | 0.42             | 0.50          | 0.36            | 4.90             | 0.26           | 2.08              | 0.35            | 32.32           | 32.74            | 1.25           | 32.76           |
| 38               | 0.70                  | 0.92             | 0.24          | 0.41            | 4.53             | 0.46           | 1.48              | 0.44            | 34.80           | 35.14            | 0.94           | 35.15           |
| 41               | -3.79                 | 0.91             | 0.21          | 0.44            | 4.93             | 0.62           | 1.48              | 0.41            | 37.51           | 37.86            | 1.14           | 37.88           |

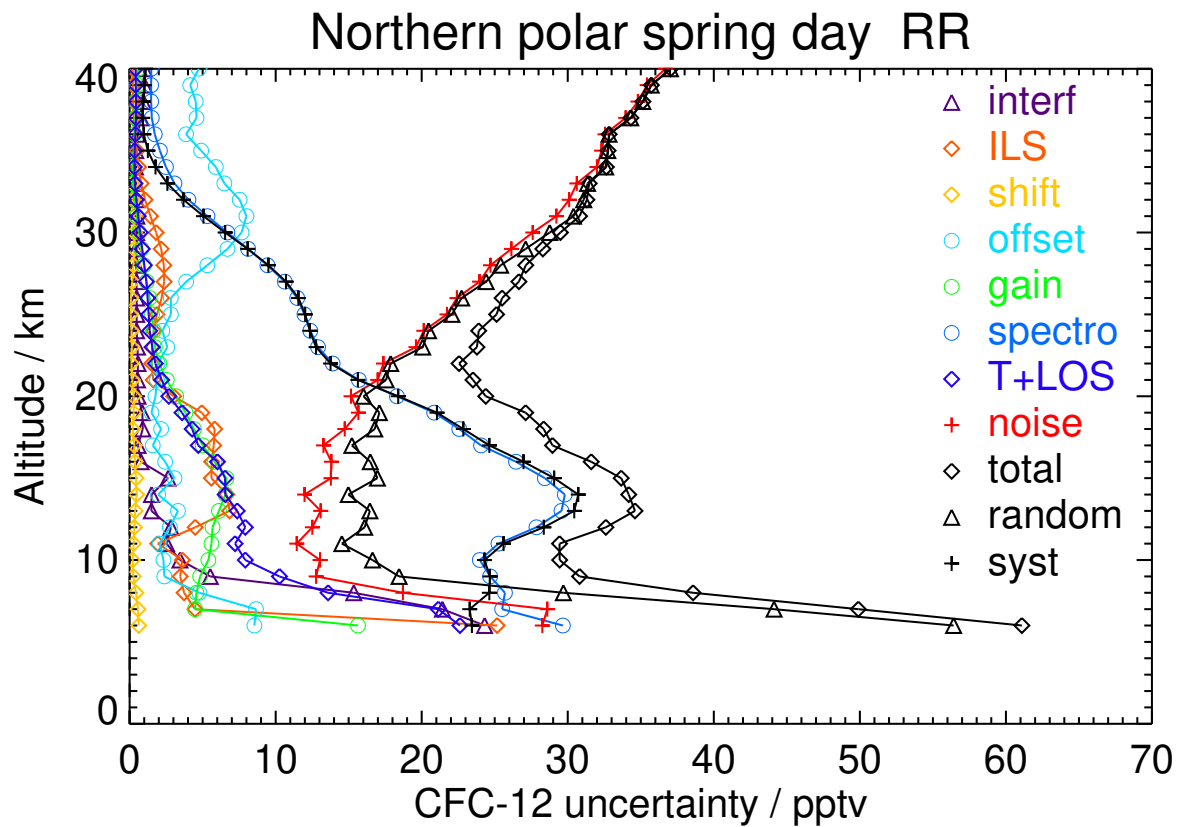

**Figure S37.** V8R\_F-12\_261 Northern polar spring day

**Table S39.** CFC-12 error budget for Northern polar spring night. All uncertainties are  $1\sigma$ .

| altitude<br>(km) | mean target<br>(pptv) | interf<br>(pptv) | ILS<br>(pptv) | shift<br>(pptv) | offset<br>(pptv) | gain<br>(pptv) | spectro<br>(pptv) | T+LOS<br>(pptv) | noise<br>(pptv) | random<br>(pptv) | syst<br>(pptv) | total<br>(pptv) |
|------------------|-----------------------|------------------|---------------|-----------------|------------------|----------------|-------------------|-----------------|-----------------|------------------|----------------|-----------------|
| 8                | 527.86                | 16.73            | 3.77          | 0.57            | 7.43             | 4.25           | 27.19             | 17.30           | 24.72           | 36.59            | 26.04          | 44.91           |
| 11               | 493.20                | 3.06             | 2.65          | 0.30            | 2.38             | 6.20           | 25.41             | 7.72            | 13.28           | 16.95            | 25.60          | 30.70           |
| 14               | 443.18                | 0.97             | 6.52          | 0.52            | 2.87             | 5.77           | 28.51             | 6.99            | 13.13           | 16.83            | 28.91          | 33.46           |
| 17               | 357.58                | 0.81             | 7.31          | 0.49            | 2.44             | 5.93           | 29.24             | 5.78            | 14.31           | 17.13            | 29.92          | 34.48           |
| 20               | 243.23                | 0.66             | 4.04          | 0.35            | 1.52             | 3.57           | 20.37             | 3.38            | 15.82           | 16.85            | 20.61          | 26.62           |
| 23               | 175.10                | 0.51             | 2.16          | 0.11            | 2.89             | 2.12           | 14.52             | 1.70            | 20.28           | 20.81            | 14.49          | 25.35           |
| 26               | 111.95                | 0.48             | 2.21          | 0.10            | 3.16             | 1.18           | 10.54             | 1.16            | 22.06           | 22.45            | 10.56          | 24.81           |
| 29               | 78.04                 | 0.41             | 1.97          | 0.32            | 6.78             | 0.76           | 7.43              | 0.75            | 26.35           | 27.35            | 7.29           | 28.30           |
| 32               | 31.77                 | 0.27             | 1.37          | 0.25            | 6.92             | 0.31           | 4.83              | 0.61            | 29.39           | 30.27            | 4.61           | 30.62           |
| 35               | -8.67                 | 0.28             | 0.57          | 0.37            | 5.29             | 0.25           | 2.13              | 0.42            | 32.27           | 32.74            | 1.64           | 32.78           |
| 38               | -6.93                 | 0.66             | 0.23          | 0.44            | 4.74             | 0.44           | 1.35              | 0.40            | 34.64           | 34.99            | 0.96           | 35.00           |
| 41               | -7.20                 | 0.71             | 0.20          | 0.46            | 5.02             | 0.58           | 1.38              | 0.40            | 37.45           | 37.82            | 1.03           | 37.83           |

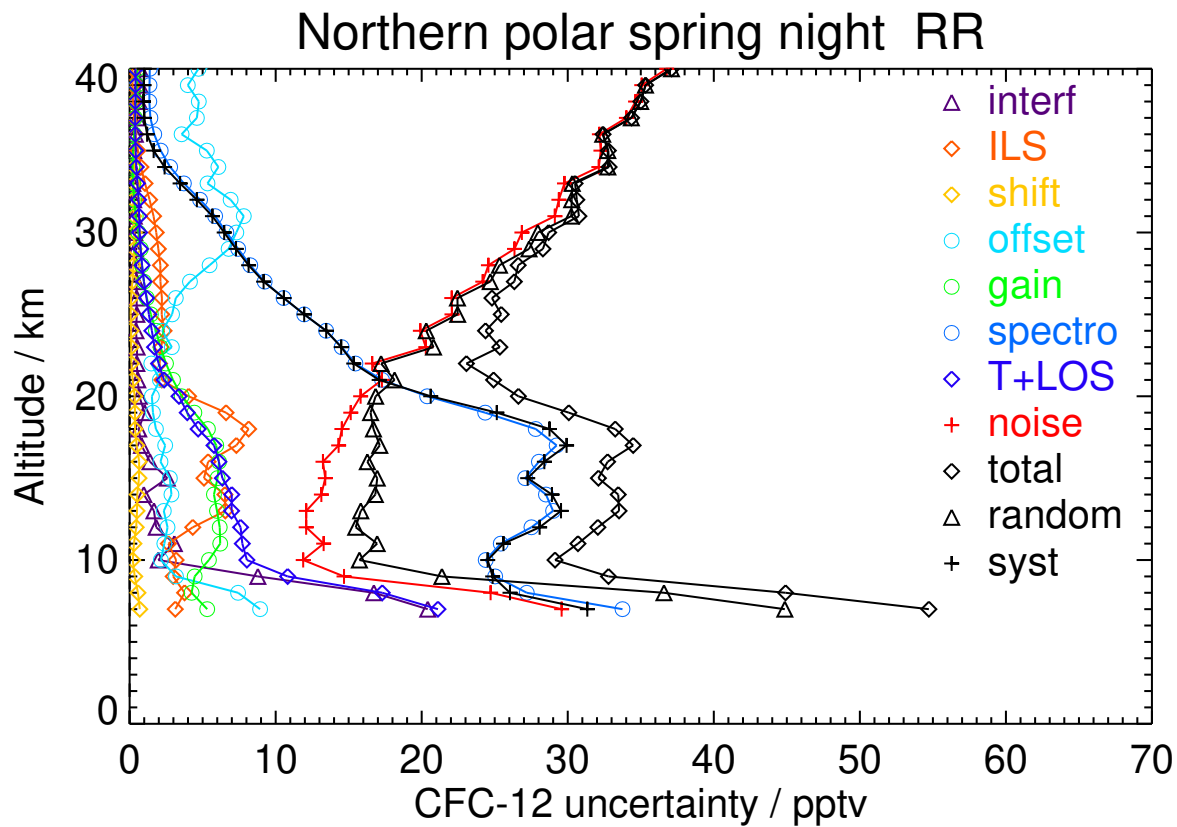

**Figure S38.** V8R\_F-12\_261 Northern polar spring night



**Table S40.** CFC-12 error budget for Northern polar summer day. All uncertainties are  $1\sigma$ .

| altitude<br>(km) | mean target<br>(pptv) | interf<br>(pptv) | ILS<br>(pptv) | shift<br>(pptv) | offset<br>(pptv) | gain<br>(pptv) | spectro<br>(pptv) | T+LOS<br>(pptv) | noise<br>(pptv) | random<br>(pptv) | syst<br>(pptv) | total<br>(pptv) |
|------------------|-----------------------|------------------|---------------|-----------------|------------------|----------------|-------------------|-----------------|-----------------|------------------|----------------|-----------------|
| 8                | 519.27                | 10.20            | 6.64          | 0.30            | 5.33             | 4.68           | 22.51             | 12.27           | 19.79           | 25.99            | 23.91          | 35.32           |
| 11               | 512.33                | 4.76             | 4.10          | 0.41            | 2.36             | 5.18           | 24.59             | 7.95            | 11.50           | 15.94            | 24.86          | 29.53           |
| 14               | 488.67                | 1.83             | 5.98          | 0.23            | 1.89             | 4.60           | 25.26             | 6.95            | 11.83           | 14.88            | 25.86          | 29.83           |
| 17               | 442.91                | 1.85             | 5.69          | 0.45            | 2.14             | 5.97           | 30.72             | 5.71            | 12.74           | 15.03            | 31.45          | 34.86           |
| 20               | 319.94                | 1.26             | 4.42          | 0.18            | 1.90             | 5.05           | 24.74             | 3.77            | 12.85           | 14.19            | 25.30          | 29.01           |
| 23               | 208.75                | 0.77             | 1.74          | 0.12            | 3.66             | 2.75           | 16.72             | 2.20            | 19.18           | 19.92            | 16.74          | 26.01           |
| 26               | 154.36                | 0.88             | 2.91          | 0.32            | 1.60             | 1.66           | 11.19             | 1.26            | 17.23           | 17.76            | 11.10          | 20.94           |
| 29               | 94.37                 | 1.00             | 3.08          | 0.30            | 4.87             | 0.63           | 9.10              | 1.06            | 22.17           | 22.84            | 9.41           | 24.70           |
| 32               | 44.66                 | 0.89             | 1.37          | 0.45            | 5.90             | 0.23           | 4.33              | 0.54            | 23.89           | 24.69            | 4.25           | 25.05           |
| 35               | 13.89                 | 0.22             | 0.50          | 0.46            | 3.67             | 0.70           | 2.60              | 0.36            | 22.84           | 23.21            | 2.11           | 23.30           |
| 38               | -4.32                 | 0.31             | 0.13          | 0.35            | 4.17             | 0.73           | 1.60              | 0.42            | 26.33           | 26.68            | 1.41           | 26.72           |
| 41               | -4.16                 | 0.32             | 0.22          | 0.50            | 3.80             | 0.92           | 1.66              | 0.40            | 29.36           | 29.63            | 1.69           | 29.67           |

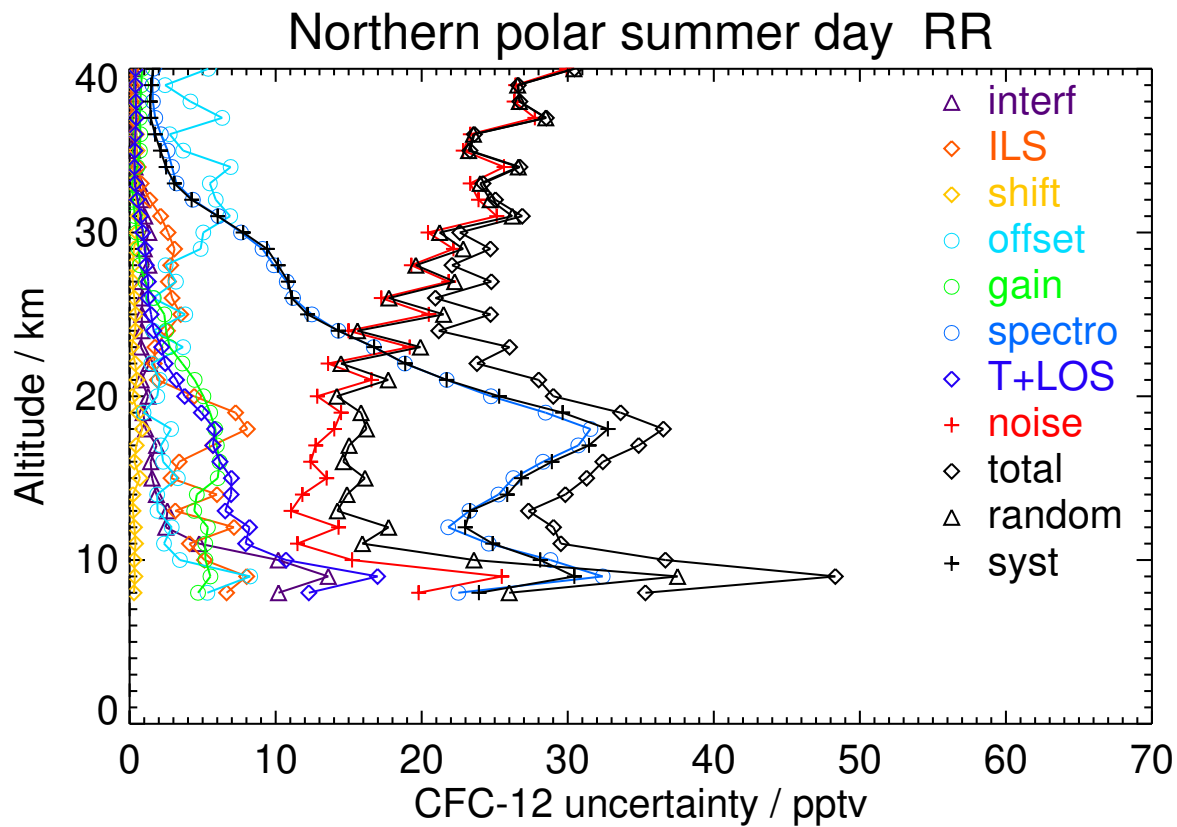

**Figure S39.** V8R\_F-12\_261 Northern polar summer day

**Table S41.** CFC-12 error budget for Northern polar summer night. All uncertainties are  $1\sigma$ .

| altitude<br>(km) | mean target<br>(pptv) | interf<br>(pptv) | ILS<br>(pptv) | shift<br>(pptv) | offset<br>(pptv) | gain<br>(pptv) | spectro<br>(pptv) | T+LOS<br>(pptv) | noise<br>(pptv) | random<br>(pptv) | syst<br>(pptv) | total<br>(pptv) |
|------------------|-----------------------|------------------|---------------|-----------------|------------------|----------------|-------------------|-----------------|-----------------|------------------|----------------|-----------------|
| 14               | 491.95                | 1.24             | 2.56          | 0.09            | 3.30             | 4.57           | 25.58             | 8.11            | 12.33           | 15.68            | 25.81          | 30.20           |
| 17               | 440.96                | 0.68             | 3.85          | 0.26            | 1.13             | 5.81           | 30.19             | 6.46            | 13.43           | 15.36            | 30.79          | 34.41           |
| 20               | 318.98                | 0.92             | 5.33          | 0.16            | 1.78             | 4.97           | 25.59             | 4.59            | 14.91           | 16.12            | 26.38          | 30.91           |
| 23               | 199.21                | 0.61             | 1.94          | 0.11            | 3.40             | 3.24           | 16.55             | 2.24            | 18.76           | 19.47            | 16.67          | 25.63           |
| 26               | 135.99                | 0.67             | 2.14          | 0.18            | 2.51             | 1.33           | 10.89             | 1.39            | 18.91           | 19.22            | 11.03          | 22.16           |
| 29               | 74.65                 | 0.71             | 2.30          | 0.37            | 4.93             | 0.62           | 8.14              | 0.95            | 22.65           | 23.30            | 8.24           | 24.71           |
| 32               | 20.34                 | 0.56             | 0.87          | 0.35            | 6.39             | 0.29           | 3.59              | 0.49            | 24.98           | 25.87            | 3.18           | 26.06           |
| 35               | 12.57                 | 0.19             | 0.39          | 0.35            | 5.05             | 0.63           | 1.92              | 0.44            | 25.82           | 26.37            | 1.33           | 26.40           |
| 38               | 6.73                  | 0.17             | 0.21          | 0.44            | 5.00             | 0.69           | 1.95              | 0.48            | 28.84           | 29.31            | 1.67           | 29.35           |
| 41               | -6.42                 | 0.19             | 0.31          | 0.47            | 4.48             | 0.74           | 1.89              | 0.38            | 32.17           | 32.50            | 1.84           | 32.56           |

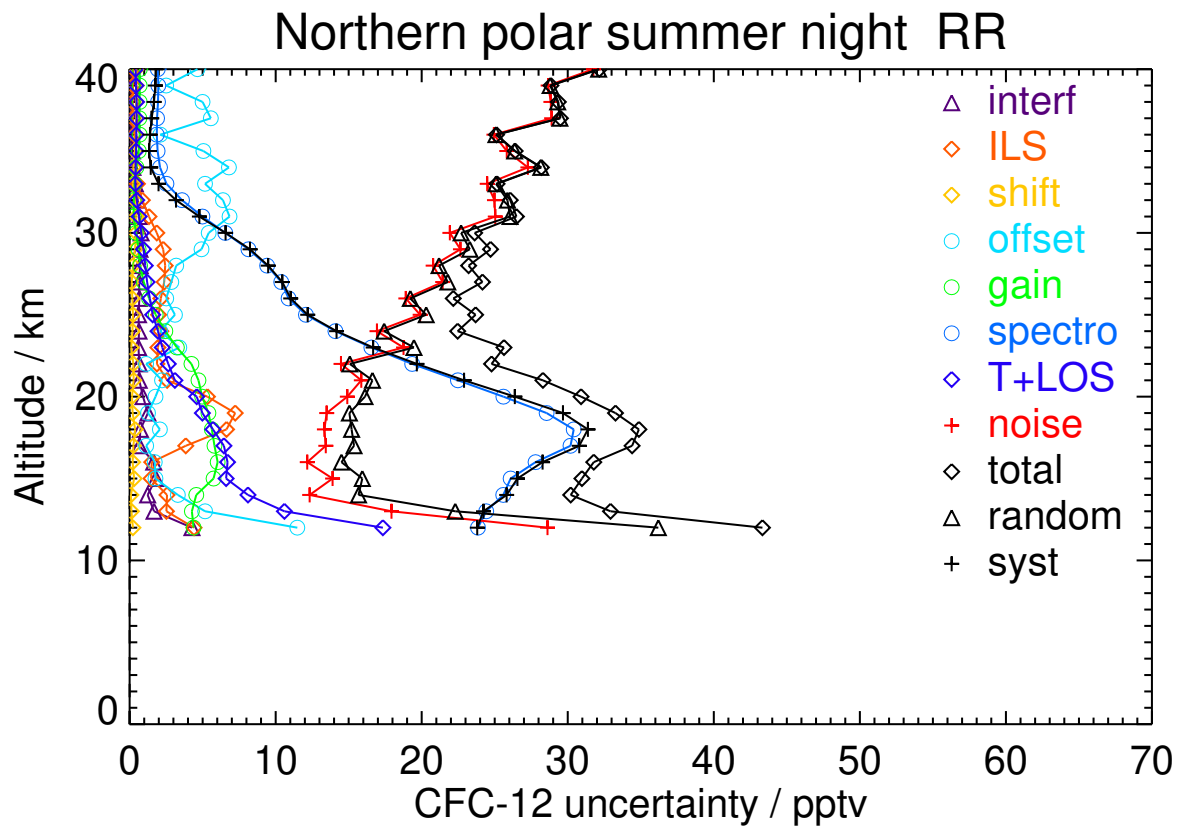

**Figure S40.** V8R\_F-12\_261 Northern polar summer night

**Table S42.** CFC-12 error budget for Northern polar autumn day. All uncertainties are  $1\sigma$ .

| altitude<br>(km) | mean target<br>(pptv) | interf<br>(pptv) | ILS<br>(pptv) | shift<br>(pptv) | offset<br>(pptv) | gain<br>(pptv) | spectro<br>(pptv) | T+LOS<br>(pptv) | noise<br>(pptv) | random<br>(pptv) | syst<br>(pptv) | total<br>(pptv) |
|------------------|-----------------------|------------------|---------------|-----------------|------------------|----------------|-------------------|-----------------|-----------------|------------------|----------------|-----------------|
| 8                | 543.86                | 8.76             | 7.25          | 0.51            | 9.03             | 3.56           | 28.78             | 14.32           | 26.23           | 32.43            | 29.89          | 44.10           |
| 11               | 513.39                | 4.52             | 3.92          | 0.32            | 9.39             | 4.71           | 26.73             | 15.54           | 26.64           | 34.01            | 25.59          | 42.56           |
| 14               | 495.51                | 1.69             | 5.79          | 0.47            | 2.66             | 6.05           | 30.29             | 8.09            | 15.21           | 18.18            | 31.05          | 35.98           |
| 17               | 382.63                | 0.53             | 7.02          | 0.41            | 2.71             | 5.83           | 30.71             | 6.86            | 14.90           | 17.66            | 31.49          | 36.10           |
| 20               | 259.22                | 0.51             | 6.26          | 0.36            | 1.57             | 4.45           | 23.34             | 3.98            | 16.51           | 18.44            | 23.55          | 29.91           |
| 23               | 153.01                | 0.48             | 1.99          | 0.09            | 2.78             | 2.10           | 15.16             | 1.93            | 19.71           | 20.40            | 14.90          | 25.26           |
| 26               | 85.48                 | 0.50             | 1.80          | 0.08            | 3.10             | 1.14           | 9.51              | 1.11            | 22.20           | 22.68            | 9.21           | 24.48           |
| 29               | 29.62                 | 0.45             | 1.19          | 0.23            | 6.29             | 0.57           | 5.73              | 0.64            | 25.84           | 26.82            | 4.79           | 27.25           |
| 32               | -0.39                 | 0.33             | 0.63          | 0.21            | 7.21             | 0.17           | 2.32              | 0.36            | 29.67           | 30.59            | 1.55           | 30.63           |
| 35               | -3.09                 | 0.20             | 0.29          | 0.30            | 5.84             | 0.31           | 1.57              | 0.42            | 33.21           | 33.76            | 0.70           | 33.76           |
| 38               | 9.37                  | 0.25             | 0.31          | 0.41            | 5.14             | 0.40           | 1.54              | 0.41            | 36.55           | 36.94            | 0.98           | 36.95           |
| 41               | 5.88                  | 0.33             | 0.35          | 0.45            | 7.02             | 0.42           | 1.54              | 0.37            | 40.20           | 40.83            | 1.33           | 40.85           |

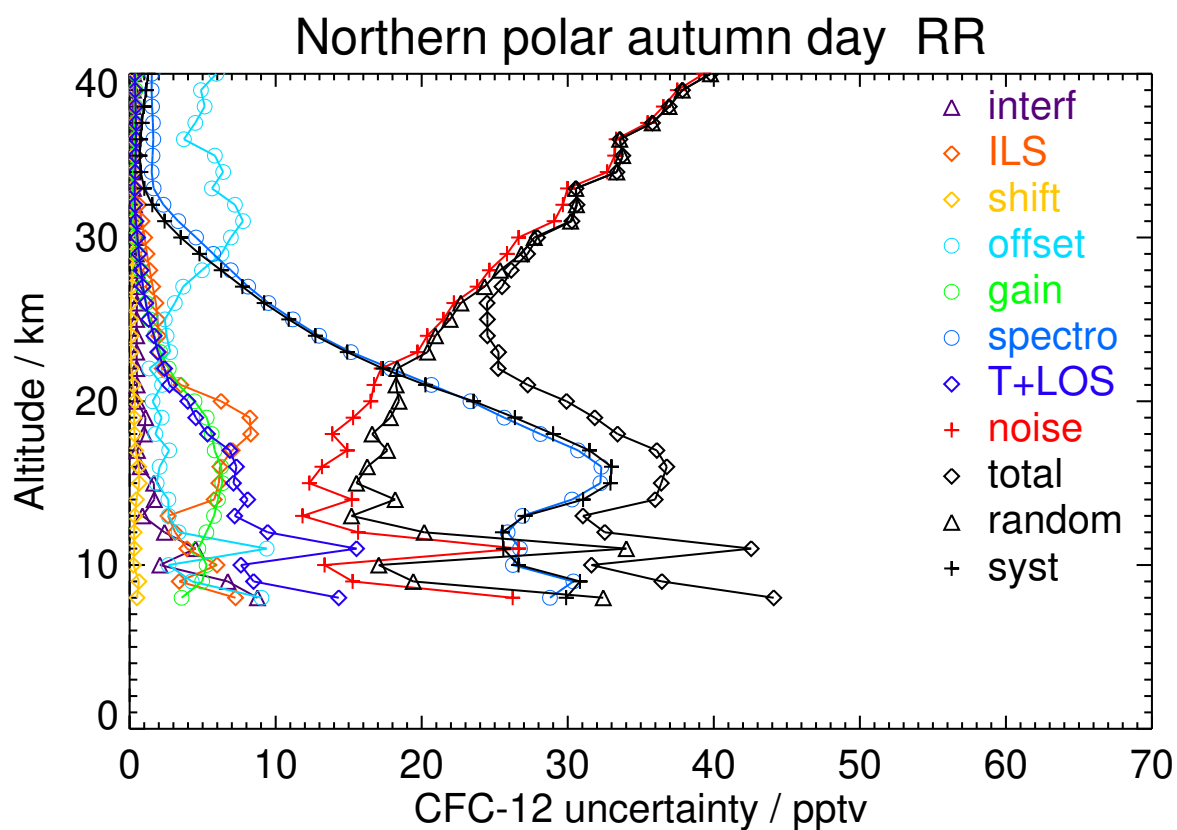**Figure S41.** V8R\_F-12\_261 Northern polar autumn day

**Table S43.** CFC-12 error budget for Northern polar autumn night. All uncertainties are  $1\sigma$ .

| altitude<br>(km) | mean target<br>(pptv) | interf<br>(pptv) | ILS<br>(pptv) | shift<br>(pptv) | offset<br>(pptv) | gain<br>(pptv) | spectro<br>(pptv) | T+LOS<br>(pptv) | noise<br>(pptv) | random<br>(pptv) | syst<br>(pptv) | total<br>(pptv) |
|------------------|-----------------------|------------------|---------------|-----------------|------------------|----------------|-------------------|-----------------|-----------------|------------------|----------------|-----------------|
| 8                | 588.39                | 14.01            | 1.06          | 0.63            | 8.42             | 4.70           | 36.31             | 14.30           | 23.77           | 32.21            | 36.62          | 48.77           |
| 11               | 515.14                | 4.43             | 3.06          | 0.47            | 9.46             | 5.03           | 28.37             | 15.16           | 25.90           | 32.81            | 27.80          | 43.00           |
| 14               | 479.12                | 1.82             | 6.49          | 0.58            | 2.67             | 5.97           | 30.43             | 8.00            | 15.06           | 18.52            | 31.02          | 36.13           |
| 17               | 373.22                | 0.59             | 7.05          | 0.45            | 2.48             | 6.41           | 30.82             | 6.58            | 14.67           | 17.05            | 31.86          | 36.13           |
| 20               | 248.96                | 0.54             | 5.32          | 0.35            | 1.54             | 4.04           | 21.35             | 3.67            | 16.35           | 18.10            | 21.37          | 28.00           |
| 23               | 160.86                | 0.50             | 2.29          | 0.07            | 2.83             | 2.35           | 16.16             | 1.89            | 20.01           | 21.03            | 15.56          | 26.16           |
| 26               | 80.65                 | 0.50             | 2.22          | 0.11            | 3.14             | 1.26           | 9.85              | 1.18            | 22.14           | 22.62            | 9.68           | 24.60           |
| 29               | 25.99                 | 0.48             | 1.12          | 0.24            | 6.39             | 0.45           | 4.51              | 0.60            | 25.90           | 26.80            | 3.98           | 27.09           |
| 32               | 13.06                 | 0.35             | 0.52          | 0.20            | 6.85             | 0.28           | 2.68              | 0.41            | 29.07           | 29.96            | 1.64           | 30.00           |
| 35               | 12.59                 | 0.15             | 0.50          | 0.31            | 5.52             | 0.41           | 2.45              | 0.41            | 32.43           | 32.96            | 1.56           | 33.00           |
| 38               | 5.03                  | 0.17             | 0.44          | 0.40            | 5.28             | 0.43           | 2.23              | 0.42            | 36.05           | 36.47            | 1.71           | 36.51           |
| 41               | -10.20                | 0.26             | 0.41          | 0.45            | 6.62             | 0.44           | 1.97              | 0.37            | 39.73           | 40.31            | 1.43           | 40.33           |

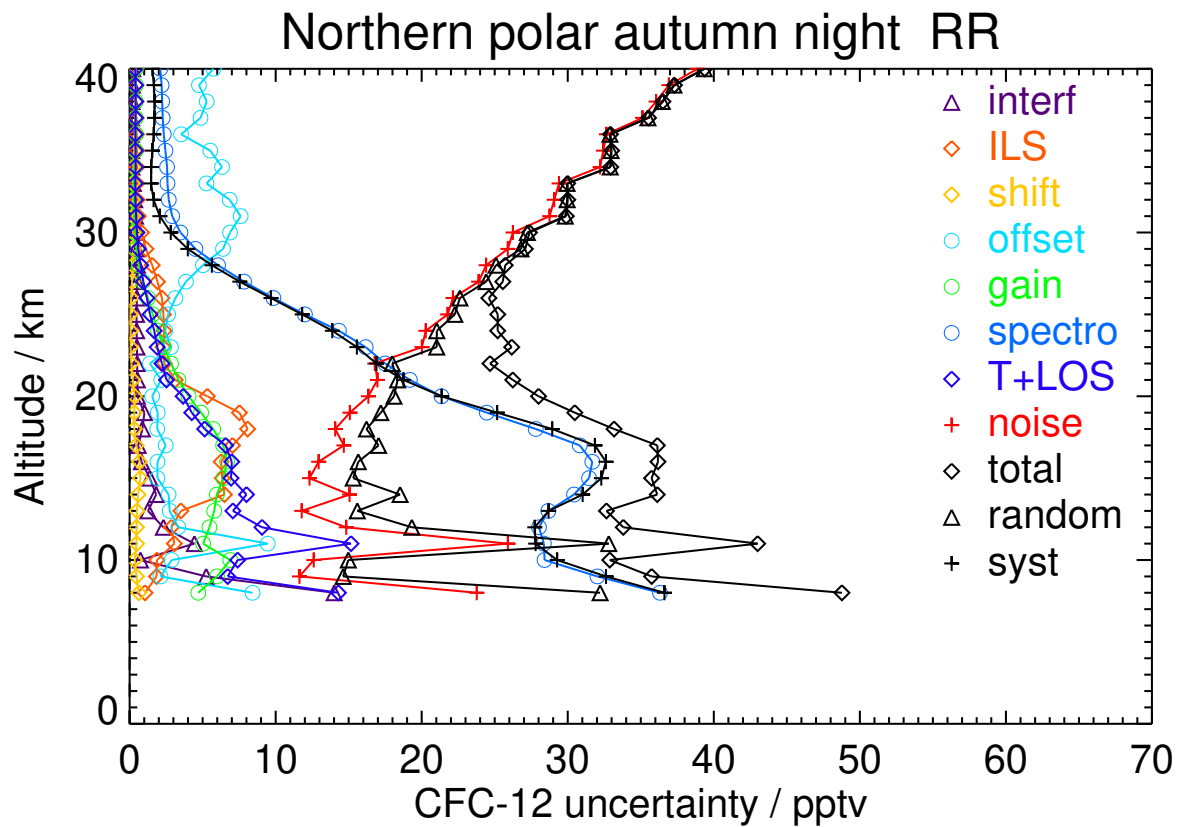

**Figure S42.** V8R\_F-12\_261 Northern polar autumn night

**Table S44.** CFC-12 error budget for Northern midlatitude winter day. All uncertainties are  $1\sigma$ .

| altitude<br>(km) | mean target<br>(pptv) | interf<br>(pptv) | ILS<br>(pptv) | shift<br>(pptv) | offset<br>(pptv) | gain<br>(pptv) | spectro<br>(pptv) | T+LOS<br>(pptv) | noise<br>(pptv) | random<br>(pptv) | syst<br>(pptv) | total<br>(pptv) |
|------------------|-----------------------|------------------|---------------|-----------------|------------------|----------------|-------------------|-----------------|-----------------|------------------|----------------|-----------------|
| 8                | 536.13                | 11.72            | 5.09          | 0.41            | 2.65             | 5.39           | 26.25             | 10.01           | 14.52           | 23.15            | 25.76          | 34.63           |
| 11               | 519.53                | 3.06             | 5.67          | 0.22            | 3.27             | 5.63           | 23.98             | 8.25            | 12.64           | 17.97            | 23.74          | 29.78           |
| 14               | 470.79                | 1.38             | 5.79          | 0.50            | 3.28             | 6.14           | 28.16             | 7.17            | 13.40           | 17.02            | 28.61          | 33.29           |
| 17               | 427.60                | 0.81             | 4.92          | 0.27            | 2.23             | 5.62           | 29.76             | 6.03            | 14.48           | 17.54            | 29.76          | 34.54           |
| 20               | 304.16                | 0.81             | 5.59          | 0.39            | 1.95             | 4.12           | 22.19             | 3.85            | 15.72           | 17.31            | 22.53          | 28.41           |
| 23               | 262.24                | 0.67             | 3.36          | 0.20            | 1.74             | 2.69           | 19.74             | 2.46            | 17.91           | 19.22            | 19.21          | 27.18           |
| 26               | 161.21                | 0.80             | 3.38          | 0.10            | 2.09             | 1.99           | 14.29             | 1.65            | 19.71           | 20.60            | 13.83          | 24.81           |
| 29               | 118.97                | 1.19             | 2.45          | 0.50            | 5.60             | 0.91           | 9.09              | 1.05            | 23.25           | 24.29            | 8.61           | 25.77           |
| 32               | 67.48                 | 0.77             | 1.59          | 0.36            | 6.29             | 0.37           | 6.76              | 0.57            | 24.29           | 25.26            | 6.42           | 26.06           |
| 35               | 19.48                 | 0.44             | 0.64          | 0.39            | 5.01             | 0.65           | 3.77              | 0.46            | 27.25           | 27.81            | 3.14           | 27.99           |
| 38               | -2.07                 | 0.41             | 0.25          | 0.41            | 4.38             | 0.64           | 2.23              | 0.44            | 30.72           | 31.08            | 1.69           | 31.12           |
| 41               | -1.20                 | 0.47             | 0.19          | 0.48            | 4.74             | 0.64           | 1.55              | 0.40            | 34.63           | 34.98            | 1.34           | 35.00           |

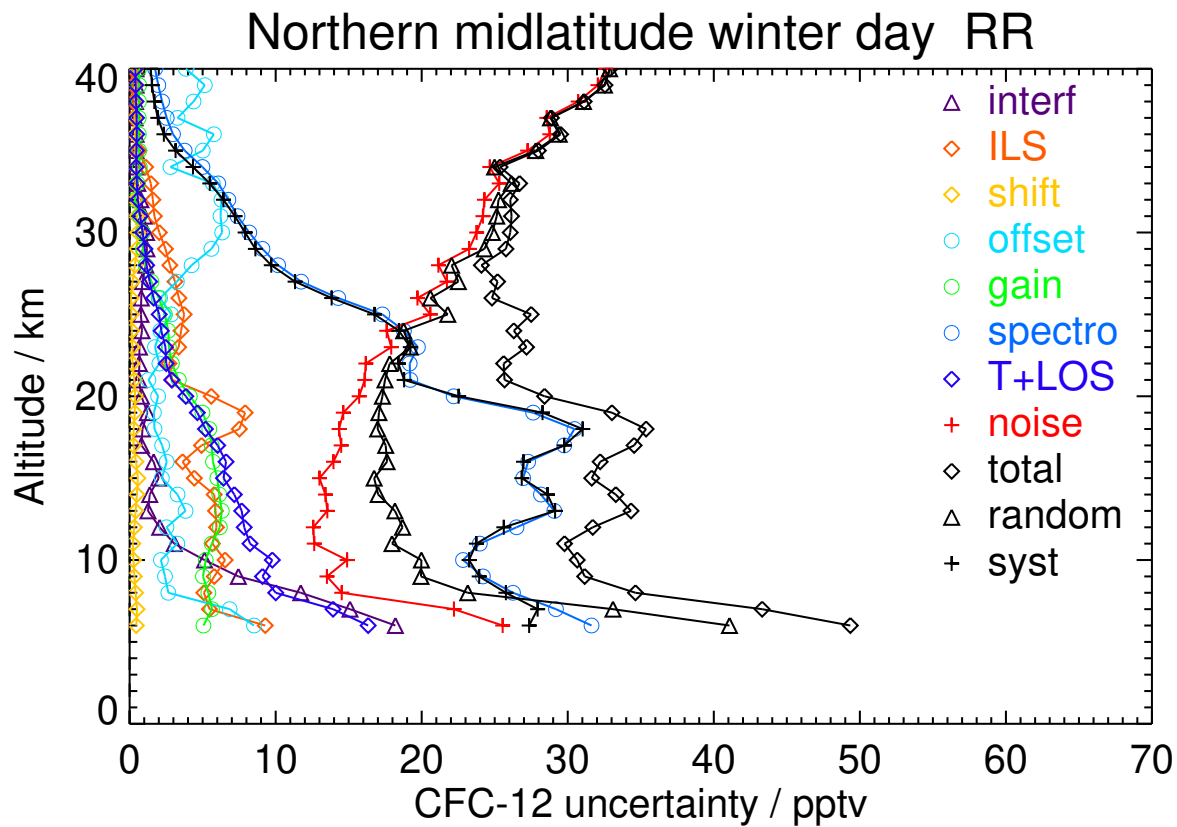

**Figure S43.** V8R\_F-12\_261 Northern midlatitude winter day

**Table S45.** CFC-12 error budget for Northern midlatitude winter night. All uncertainties are  $1\sigma$ .

| altitude<br>(km) | mean target<br>(pptv) | interf<br>(pptv) | ILS<br>(pptv) | shift<br>(pptv) | offset<br>(pptv) | gain<br>(pptv) | spectro<br>(pptv) | T+LOS<br>(pptv) | noise<br>(pptv) | random<br>(pptv) | syst<br>(pptv) | total<br>(pptv) |
|------------------|-----------------------|------------------|---------------|-----------------|------------------|----------------|-------------------|-----------------|-----------------|------------------|----------------|-----------------|
| 8                | 542.57                | 12.80            | 4.80          | 0.51            | 2.69             | 5.57           | 29.08             | 9.77            | 14.07           | 22.76            | 29.09          | 36.94           |
| 11               | 519.66                | 3.85             | 3.59          | 0.31            | 2.35             | 6.05           | 26.18             | 8.07            | 12.28           | 16.57            | 26.40          | 31.17           |
| 14               | 491.39                | 1.10             | 5.39          | 0.49            | 3.30             | 6.18           | 27.87             | 7.24            | 13.62           | 17.84            | 27.85          | 33.08           |
| 17               | 427.56                | 0.77             | 5.18          | 0.34            | 2.31             | 6.12           | 30.86             | 6.47            | 14.65           | 18.15            | 30.82          | 35.76           |
| 20               | 320.75                | 0.82             | 6.09          | 0.68            | 2.07             | 4.14           | 23.76             | 3.96            | 15.97           | 19.06            | 23.05          | 29.92           |
| 23               | 259.05                | 0.73             | 2.81          | 0.29            | 1.86             | 2.44           | 19.36             | 2.42            | 18.03           | 19.34            | 18.69          | 26.90           |
| 26               | 179.71                | 0.71             | 3.91          | 0.12            | 2.21             | 1.60           | 15.71             | 1.77            | 19.94           | 20.79            | 15.44          | 25.90           |
| 29               | 102.79                | 1.22             | 3.09          | 0.52            | 5.83             | 0.89           | 9.46              | 1.14            | 23.57           | 24.64            | 9.24           | 26.32           |
| 32               | 68.33                 | 0.96             | 1.42          | 0.32            | 6.27             | 0.31           | 5.85              | 0.56            | 23.98           | 24.99            | 5.26           | 25.53           |
| 35               | 19.11                 | 0.52             | 0.58          | 0.39            | 4.58             | 0.70           | 3.88              | 0.41            | 26.64           | 27.13            | 3.32           | 27.34           |
| 38               | -11.57                | 0.67             | 0.28          | 0.41            | 4.19             | 0.65           | 2.24              | 0.39            | 29.64           | 29.99            | 1.71           | 30.04           |
| 41               | -13.02                | 0.54             | 0.19          | 0.44            | 4.24             | 0.75           | 1.39              | 0.35            | 33.12           | 33.41            | 1.32           | 33.44           |

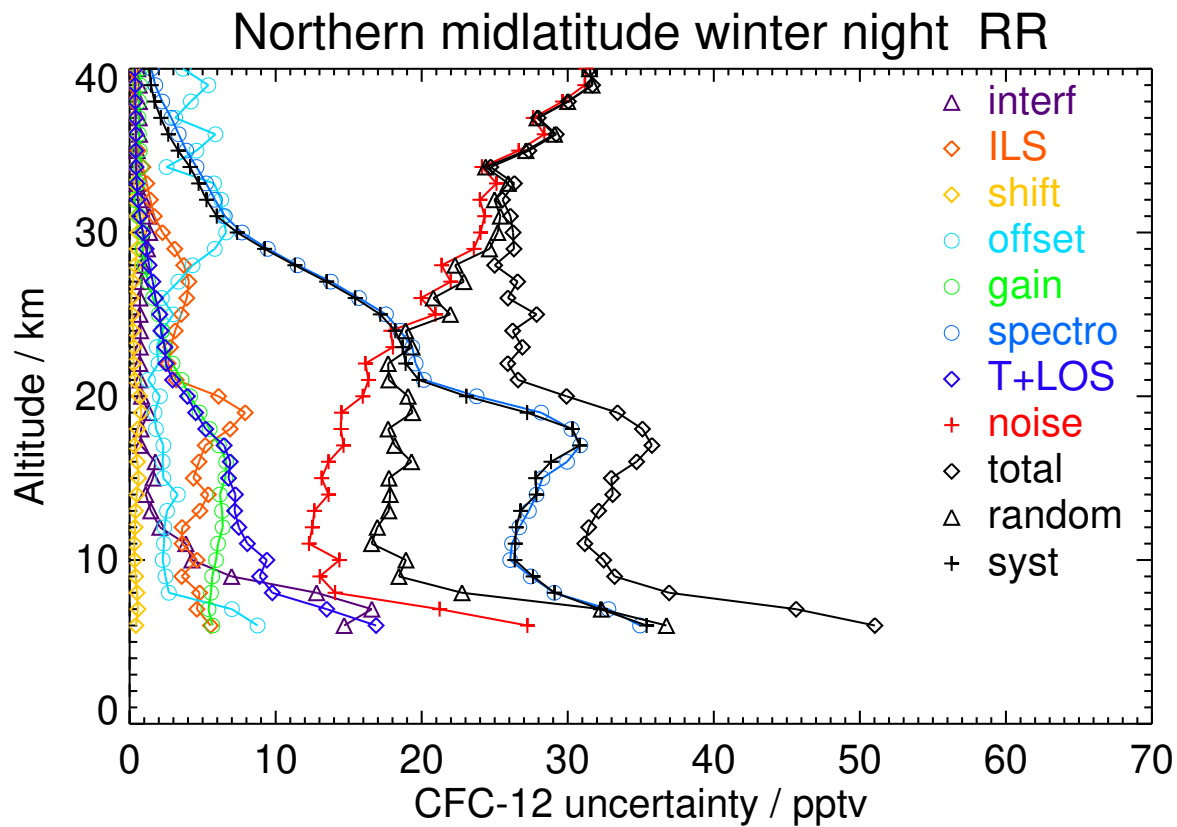

**Figure S44.** V8R\_F-12\_261 Northern midlatitude winter night

**Table S46.** CFC-12 error budget for Northern midlatitude spring day. All uncertainties are  $1\sigma$ .

| altitude<br>(km) | mean target<br>(pptv) | interf<br>(pptv) | ILS<br>(pptv) | shift<br>(pptv) | offset<br>(pptv) | gain<br>(pptv) | spectro<br>(pptv) | T+LOS<br>(pptv) | noise<br>(pptv) | random<br>(pptv) | syst<br>(pptv) | total<br>(pptv) |
|------------------|-----------------------|------------------|---------------|-----------------|------------------|----------------|-------------------|-----------------|-----------------|------------------|----------------|-----------------|
| 8                | 539.43                | 14.90            | 7.17          | 0.42            | 6.53             | 6.36           | 26.60             | 14.61           | 22.70           | 34.00            | 25.24          | 42.35           |
| 11               | 504.59                | 3.50             | 4.98          | 0.28            | 2.27             | 5.94           | 25.09             | 8.44            | 13.80           | 18.08            | 25.34          | 31.13           |
| 14               | 490.66                | 1.74             | 5.23          | 0.41            | 3.15             | 6.13           | 27.86             | 7.03            | 13.20           | 17.36            | 27.87          | 32.83           |
| 17               | 427.57                | 0.77             | 6.06          | 0.23            | 2.20             | 6.70           | 30.88             | 6.20            | 14.24           | 17.45            | 31.27          | 35.81           |
| 20               | 321.92                | 0.77             | 5.66          | 0.39            | 1.51             | 4.84           | 26.15             | 4.06            | 15.83           | 17.92            | 26.23          | 31.77           |
| 23               | 222.14                | 0.62             | 2.68          | 0.22            | 1.55             | 2.85           | 17.60             | 2.26            | 17.40           | 18.26            | 17.39          | 25.21           |
| 26               | 166.23                | 0.62             | 2.21          | 0.16            | 2.68             | 1.68           | 12.00             | 1.38            | 21.43           | 21.94            | 11.79          | 24.91           |
| 29               | 127.40                | 1.09             | 2.99          | 0.55            | 6.04             | 1.23           | 10.89             | 1.23            | 23.71           | 24.91            | 10.49          | 27.03           |
| 32               | 54.36                 | 0.43             | 2.11          | 0.42            | 6.04             | 0.42           | 7.75              | 0.63            | 25.90           | 27.01            | 6.55           | 27.80           |
| 35               | 13.25                 | 0.60             | 0.78          | 0.43            | 4.89             | 0.64           | 3.44              | 0.53            | 28.32           | 28.88            | 2.42           | 28.98           |
| 38               | -5.98                 | 0.68             | 0.22          | 0.44            | 4.51             | 0.74           | 1.93              | 0.43            | 30.97           | 31.34            | 1.60           | 31.38           |
| 41               | -8.81                 | 0.44             | 0.15          | 0.49            | 4.50             | 0.80           | 1.93              | 0.37            | 34.10           | 34.42            | 1.73           | 34.46           |

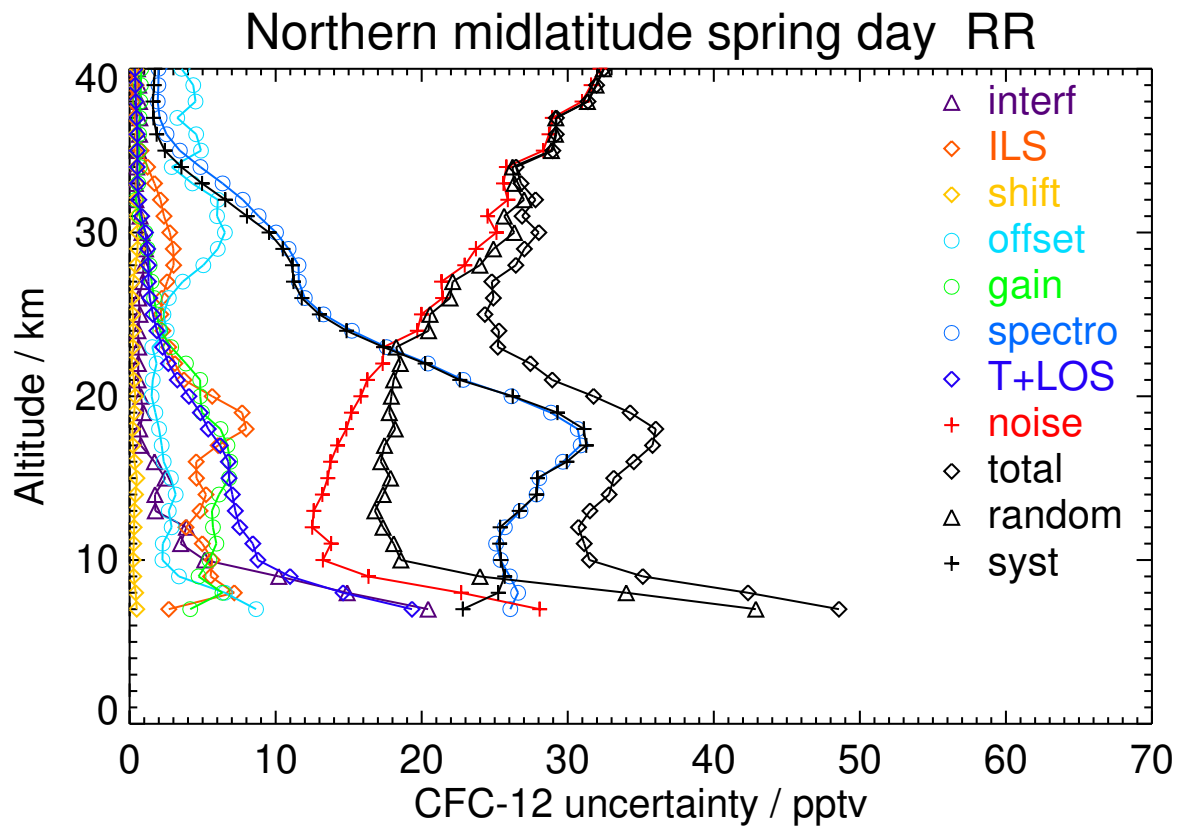

**Figure S45.** V8R\_F-12\_261 Northern midlatitude spring day

**Table S47.** CFC-12 error budget for Northern midlatitude spring night. All uncertainties are  $1\sigma$ .

| altitude<br>(km) | mean target<br>(pptv) | interf<br>(pptv) | ILS<br>(pptv) | shift<br>(pptv) | offset<br>(pptv) | gain<br>(pptv) | spectro<br>(pptv) | T+LOS<br>(pptv) | noise<br>(pptv) | random<br>(pptv) | syst<br>(pptv) | total<br>(pptv) |
|------------------|-----------------------|------------------|---------------|-----------------|------------------|----------------|-------------------|-----------------|-----------------|------------------|----------------|-----------------|
| 8                | 531.91                | 14.65            | 3.32          | 0.53            | 6.99             | 4.82           | 28.11             | 14.82           | 22.71           | 32.58            | 27.60          | 42.70           |
| 11               | 506.27                | 2.43             | 3.91          | 0.31            | 1.96             | 5.92           | 23.93             | 7.95            | 13.04           | 16.56            | 24.33          | 29.43           |
| 14               | 486.35                | 1.11             | 5.88          | 0.47            | 2.54             | 6.19           | 28.92             | 6.99            | 12.72           | 15.98            | 29.53          | 33.58           |
| 17               | 400.53                | 0.74             | 5.32          | 0.20            | 1.90             | 5.62           | 27.97             | 5.61            | 13.89           | 16.23            | 28.42          | 32.72           |
| 20               | 305.67                | 0.79             | 4.70          | 0.38            | 1.45             | 4.21           | 23.70             | 3.73            | 15.54           | 17.22            | 23.73          | 29.32           |
| 23               | 220.38                | 0.59             | 2.38          | 0.20            | 1.70             | 2.37           | 17.17             | 2.17            | 17.41           | 18.15            | 16.96          | 24.84           |
| 26               | 160.47                | 0.61             | 2.64          | 0.12            | 2.76             | 1.62           | 12.46             | 1.41            | 21.05           | 21.66            | 12.19          | 24.86           |
| 29               | 117.66                | 0.84             | 3.04          | 0.50            | 5.92             | 1.00           | 10.44             | 1.15            | 23.88           | 24.96            | 10.19          | 26.96           |
| 32               | 50.54                 | 0.41             | 1.88          | 0.36            | 5.78             | 0.40           | 6.42              | 0.59            | 25.43           | 26.22            | 6.16           | 26.94           |
| 35               | 9.02                  | 0.49             | 0.58          | 0.41            | 4.32             | 0.61           | 2.78              | 0.42            | 27.86           | 28.26            | 2.28           | 28.35           |
| 38               | -1.86                 | 0.62             | 0.16          | 0.45            | 4.11             | 0.70           | 1.68              | 0.46            | 30.72           | 31.03            | 1.51           | 31.06           |
| 41               | -11.81                | 0.47             | 0.11          | 0.48            | 4.14             | 0.77           | 1.83              | 0.42            | 33.89           | 34.17            | 1.61           | 34.21           |

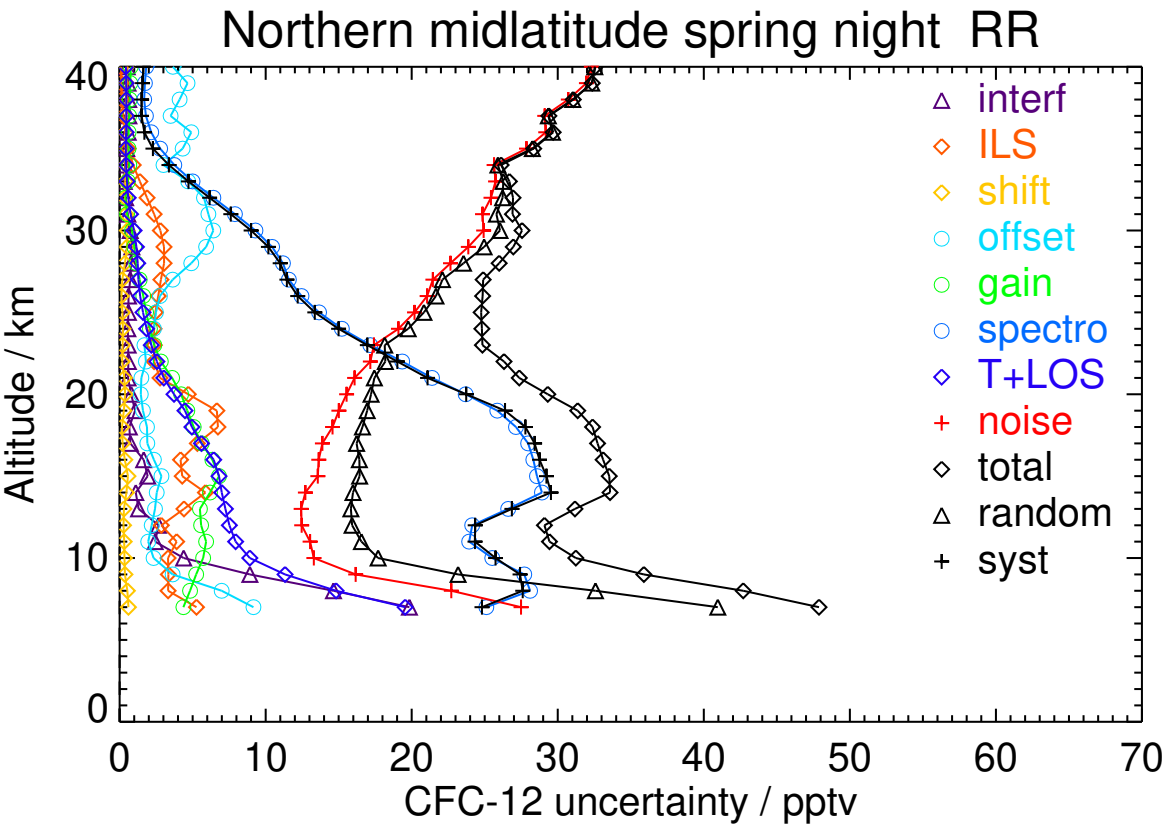

**Figure S46.** V8R\_F-12\_261 Northern midlatitude spring night



**Table S48.** CFC-12 error budget for Northern midlatitude summer day. All uncertainties are  $1\sigma$ .

| altitude<br>(km) | mean target<br>(pptv) | interf<br>(pptv) | ILS<br>(pptv) | shift<br>(pptv) | offset<br>(pptv) | gain<br>(pptv) | spectro<br>(pptv) | T+LOS<br>(pptv) | noise<br>(pptv) | random<br>(pptv) | syst<br>(pptv) | total<br>(pptv) |
|------------------|-----------------------|------------------|---------------|-----------------|------------------|----------------|-------------------|-----------------|-----------------|------------------|----------------|-----------------|
| 8                | 503.84                | 13.70            | 4.34          | 0.48            | 8.45             | 5.31           | 25.52             | 14.88           | 24.54           | 33.92            | 25.11          | 42.20           |
| 11               | 520.02                | 3.26             | 11.08         | 0.65            | 2.10             | 5.72           | 23.21             | 8.28            | 13.40           | 17.37            | 25.62          | 30.95           |
| 14               | 545.90                | 1.28             | 4.53          | 0.33            | 3.66             | 7.14           | 26.26             | 7.64            | 14.20           | 17.29            | 27.15          | 32.19           |
| 17               | 541.40                | 1.76             | 3.30          | 0.20            | 2.91             | 8.07           | 31.73             | 8.59            | 16.27           | 19.26            | 32.59          | 37.85           |
| 20               | 426.77                | 1.47             | 8.66          | 0.56            | 2.19             | 6.06           | 35.26             | 5.62            | 16.85           | 18.36            | 36.62          | 40.96           |
| 23               | 271.68                | 0.74             | 3.21          | 0.19            | 1.72             | 2.98           | 22.75             | 3.27            | 18.38           | 19.03            | 22.95          | 29.81           |
| 26               | 175.91                | 0.77             | 3.28          | 0.21            | 1.81             | 1.82           | 13.75             | 1.78            | 18.95           | 19.34            | 13.97          | 23.86           |
| 29               | 133.77                | 1.28             | 2.56          | 0.51            | 5.29             | 1.02           | 9.98              | 1.23            | 22.79           | 23.61            | 10.04          | 25.66           |
| 32               | 72.37                 | 0.70             | 1.63          | 0.30            | 5.79             | 0.29           | 7.05              | 0.54            | 23.72           | 24.51            | 6.96           | 25.48           |
| 35               | 25.26                 | 0.40             | 0.57          | 0.42            | 4.91             | 0.72           | 3.79              | 0.51            | 26.69           | 27.22            | 3.36           | 27.43           |
| 38               | 0.80                  | 0.53             | 0.30          | 0.41            | 4.43             | 0.68           | 2.02              | 0.49            | 29.42           | 29.79            | 1.78           | 29.85           |
| 41               | -3.46                 | 0.34             | 0.25          | 0.47            | 4.13             | 0.77           | 1.89              | 0.46            | 32.61           | 32.90            | 1.71           | 32.94           |

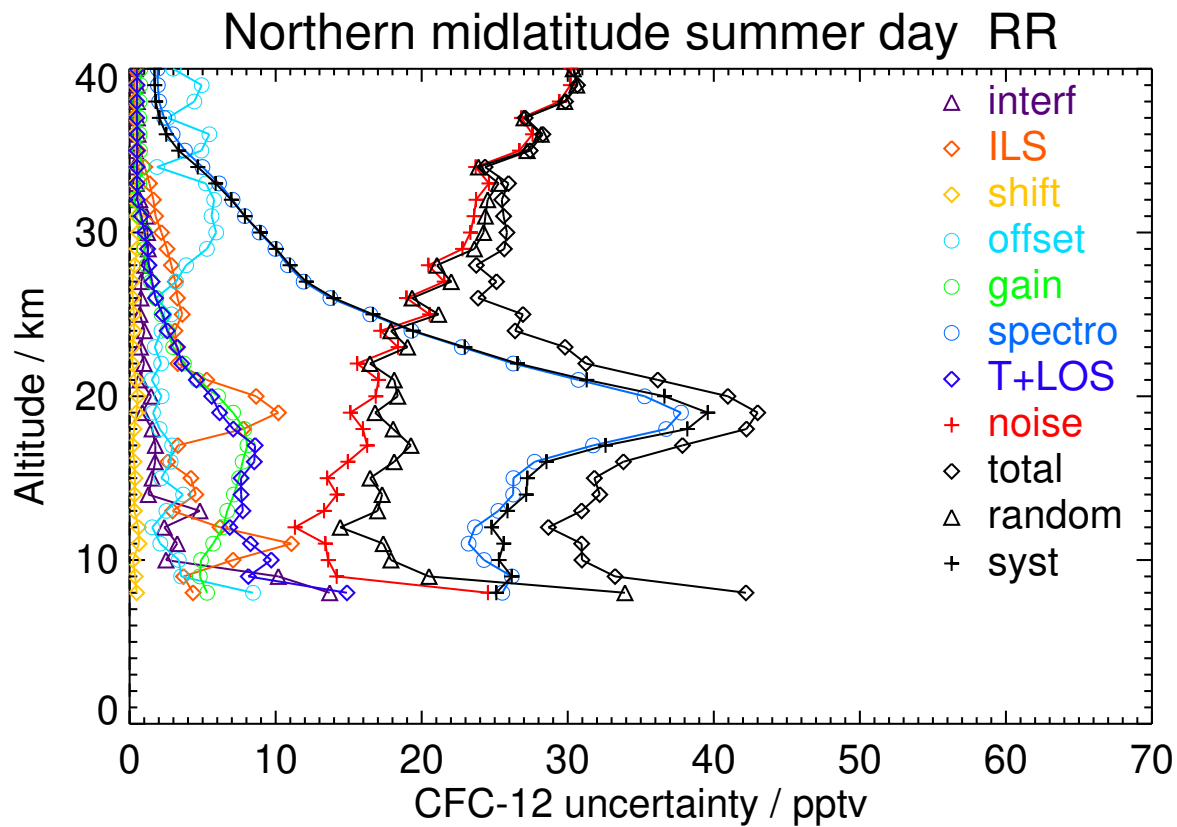

**Figure S47.** V8R\_F-12\_261 Northern midlatitude summer day

**Table S49.** CFC-12 error budget for Northern midlatitude summer night. All uncertainties are  $1\sigma$ .

| altitude<br>(km) | mean target<br>(pptv) | interf<br>(pptv) | ILS<br>(pptv) | shift<br>(pptv) | offset<br>(pptv) | gain<br>(pptv) | spectro<br>(pptv) | T+LOS<br>(pptv) | noise<br>(pptv) | random<br>(pptv) | syst<br>(pptv) | total<br>(pptv) |
|------------------|-----------------------|------------------|---------------|-----------------|------------------|----------------|-------------------|-----------------|-----------------|------------------|----------------|-----------------|
| 8                | 512.08                | 13.78            | 5.83          | 0.14            | 8.74             | 3.33           | 25.16             | 15.18           | 23.72           | 33.16            | 25.25          | 41.68           |
| 11               | 525.01                | 2.59             | 6.04          | 0.59            | 2.64             | 5.81           | 24.14             | 8.06            | 12.78           | 16.41            | 25.02          | 29.92           |
| 14               | 542.97                | 1.79             | 2.73          | 0.32            | 2.57             | 6.75           | 24.05             | 7.95            | 13.78           | 16.90            | 24.67          | 29.91           |
| 17               | 515.92                | 1.10             | 3.49          | 0.43            | 2.42             | 7.52           | 28.32             | 7.78            | 15.17           | 18.45            | 28.78          | 34.18           |
| 20               | 417.63                | 0.91             | 8.32          | 0.99            | 1.78             | 5.57           | 32.06             | 5.26            | 16.04           | 17.88            | 33.14          | 37.66           |
| 23               | 271.52                | 0.76             | 3.34          | 0.28            | 1.65             | 2.87           | 23.31             | 3.24            | 17.38           | 18.11            | 23.47          | 29.64           |
| 26               | 176.24                | 0.67             | 2.84          | 0.26            | 2.32             | 1.66           | 13.39             | 1.77            | 19.58           | 20.07            | 13.41          | 24.14           |
| 29               | 131.00                | 1.11             | 2.98          | 0.50            | 5.22             | 0.97           | 10.40             | 1.25            | 22.44           | 23.24            | 10.59          | 25.54           |
| 32               | 58.41                 | 0.68             | 1.83          | 0.34            | 5.78             | 0.28           | 6.64              | 0.62            | 23.56           | 24.36            | 6.60           | 25.24           |
| 35               | 25.52                 | 0.33             | 0.47          | 0.40            | 4.73             | 0.73           | 2.96              | 0.46            | 26.36           | 26.85            | 2.58           | 26.97           |
| 38               | 6.83                  | 0.43             | 0.21          | 0.43            | 4.26             | 0.68           | 2.06              | 0.49            | 29.11           | 29.45            | 1.84           | 29.51           |
| 41               | -14.54                | 0.25             | 0.12          | 0.44            | 4.04             | 0.81           | 1.85              | 0.42            | 32.22           | 32.49            | 1.79           | 32.54           |

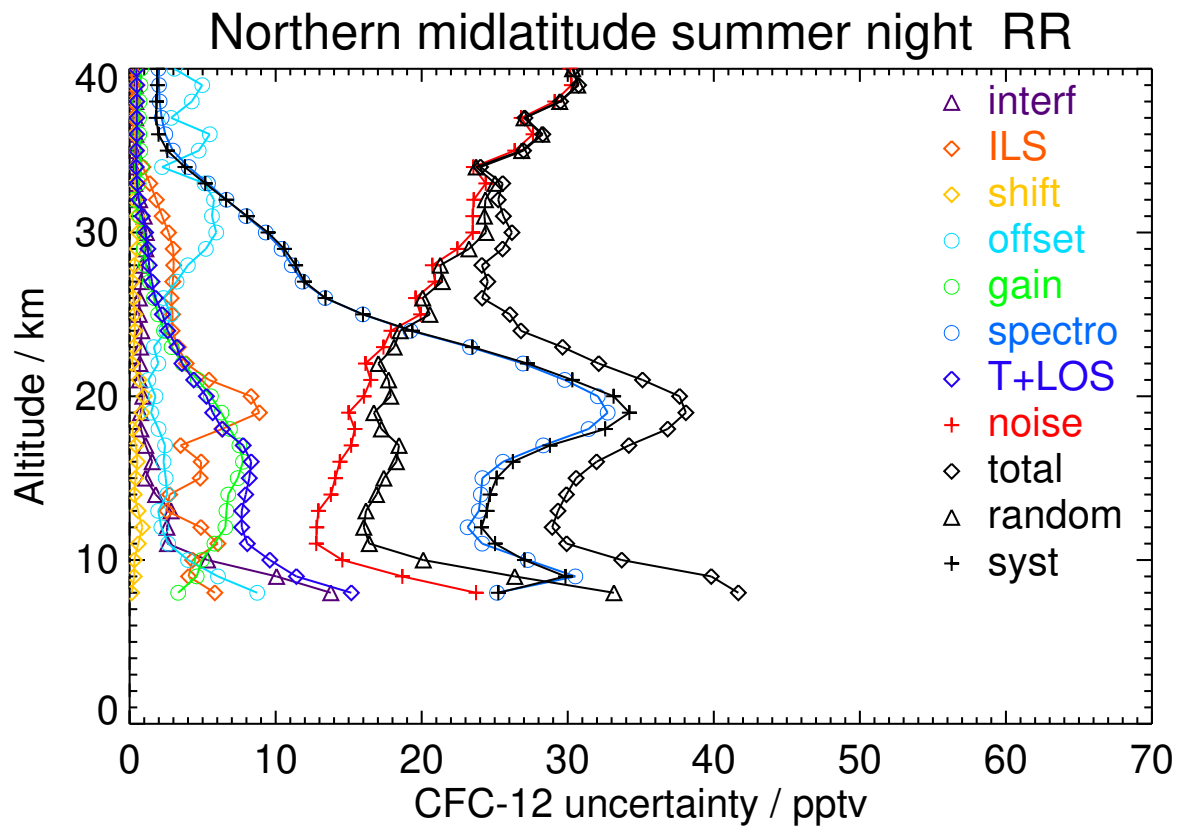

**Figure S48.** V8R\_F-12\_261 Northern midlatitude summer night

**Table S50.** CFC-12 error budget for Northern midlatitude autumn day. All uncertainties are  $1\sigma$ .

| altitude<br>(km) | mean target<br>(pptv) | interf<br>(pptv) | ILS<br>(pptv) | shift<br>(pptv) | offset<br>(pptv) | gain<br>(pptv) | spectro<br>(pptv) | T+LOS<br>(pptv) | noise<br>(pptv) | random<br>(pptv) | syst<br>(pptv) | total<br>(pptv) |
|------------------|-----------------------|------------------|---------------|-----------------|------------------|----------------|-------------------|-----------------|-----------------|------------------|----------------|-----------------|
| 8                | 502.86                | 11.59            | 5.59          | 0.29            | 8.41             | 3.09           | 25.18             | 14.32           | 24.52           | 32.71            | 24.82          | 41.06           |
| 11               | 532.27                | 1.46             | 8.26          | 0.33            | 1.84             | 6.40           | 23.22             | 7.79            | 13.79           | 16.62            | 25.07          | 30.08           |
| 14               | 540.27                | 1.04             | 3.49          | 0.40            | 3.90             | 6.37           | 25.59             | 8.10            | 14.75           | 17.84            | 26.24          | 31.73           |
| 17               | 516.21                | 0.65             | 3.35          | 0.28            | 2.59             | 7.41           | 31.91             | 7.96            | 16.08           | 18.76            | 32.58          | 37.59           |
| 20               | 412.79                | 0.69             | 9.05          | 0.66            | 2.08             | 5.92           | 33.56             | 5.36            | 17.19           | 18.72            | 34.96          | 39.66           |
| 23               | 276.28                | 0.57             | 3.64          | 0.17            | 1.71             | 2.88           | 23.74             | 3.15            | 19.23           | 20.31            | 23.58          | 31.12           |
| 26               | 182.09                | 0.80             | 3.19          | 0.10            | 1.98             | 1.74           | 15.43             | 1.80            | 19.97           | 20.56            | 15.33          | 25.65           |
| 29               | 118.80                | 0.82             | 2.49          | 0.47            | 5.92             | 1.21           | 10.13             | 1.18            | 24.70           | 25.58            | 10.17          | 27.52           |
| 32               | 68.32                 | 0.37             | 1.57          | 0.29            | 6.29             | 0.39           | 6.85              | 0.56            | 25.95           | 26.88            | 6.36           | 27.62           |
| 35               | 29.63                 | 0.47             | 0.56          | 0.40            | 4.30             | 0.56           | 3.92              | 0.43            | 28.59           | 28.99            | 3.46           | 29.20           |
| 38               | 4.55                  | 0.62             | 0.14          | 0.40            | 3.83             | 0.57           | 2.35              | 0.48            | 32.08           | 32.36            | 1.87           | 32.41           |
| 41               | 3.30                  | 0.67             | 0.19          | 0.46            | 4.39             | 0.61           | 1.62              | 0.43            | 35.87           | 36.16            | 1.41           | 36.19           |

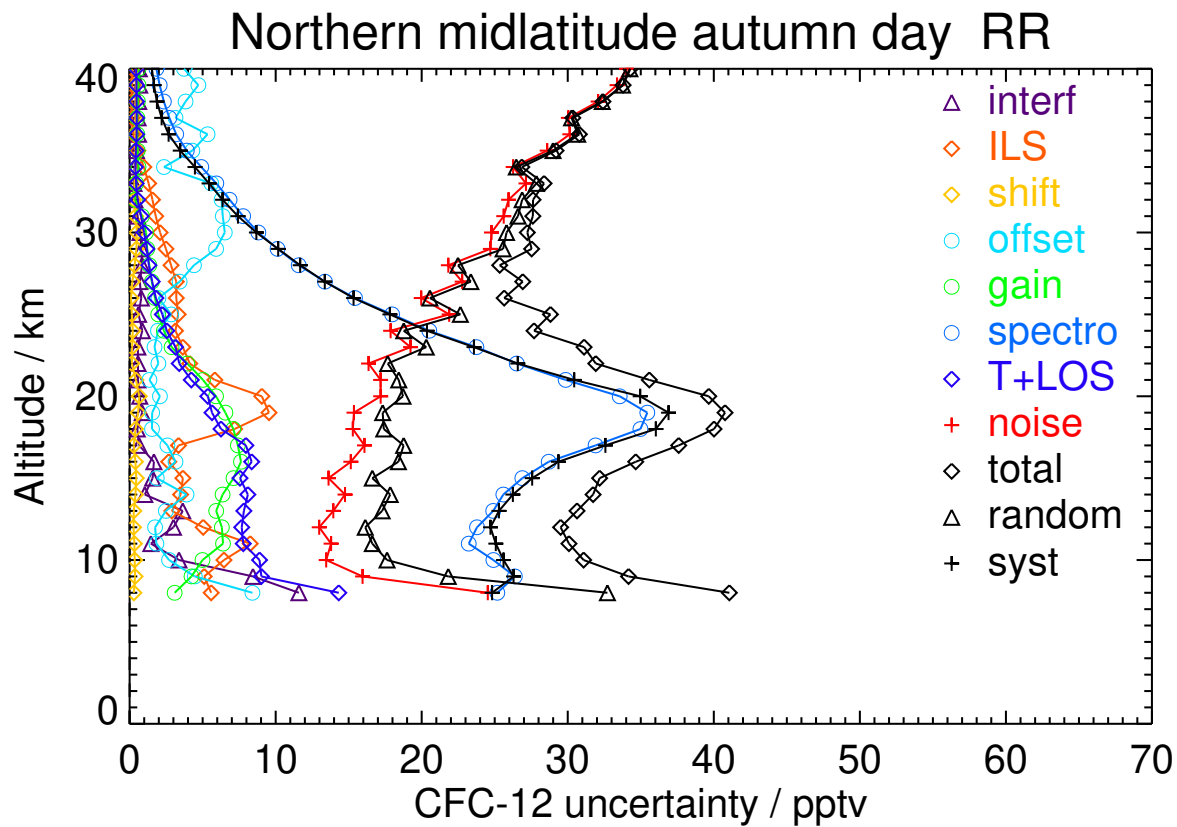

**Figure S49.** V8R\_F-12\_261 Northern midlatitude autumn day

**Table S51.** CFC-12 error budget for Northern midlatitude autumn night. All uncertainties are  $1\sigma$ .

| altitude<br>(km) | mean target<br>(pptv) | interf<br>(pptv) | ILS<br>(pptv) | shift<br>(pptv) | offset<br>(pptv) | gain<br>(pptv) | spectro<br>(pptv) | T+LOS<br>(pptv) | noise<br>(pptv) | random<br>(pptv) | syst<br>(pptv) | total<br>(pptv) |
|------------------|-----------------------|------------------|---------------|-----------------|------------------|----------------|-------------------|-----------------|-----------------|------------------|----------------|-----------------|
| 8                | 535.31                | 13.13            | 3.26          | 0.48            | 8.18             | 4.46           | 29.81             | 14.38           | 23.12           | 32.20            | 29.38          | 43.59           |
| 11               | 526.38                | 2.60             | 6.64          | 0.24            | 2.22             | 6.09           | 23.64             | 8.17            | 13.99           | 17.57            | 24.61          | 30.24           |
| 14               | 537.58                | 1.37             | 3.41          | 0.42            | 2.98             | 6.26           | 25.21             | 8.14            | 14.51           | 17.99            | 25.51          | 31.21           |
| 17               | 502.27                | 0.77             | 3.40          | 0.36            | 2.39             | 7.05           | 30.22             | 7.32            | 15.40           | 18.42            | 30.54          | 35.67           |
| 20               | 396.45                | 0.75             | 8.19          | 0.57            | 1.84             | 5.30           | 32.32             | 5.16            | 16.68           | 18.53            | 33.25          | 38.07           |
| 23               | 253.32                | 0.69             | 3.99          | 0.36            | 1.86             | 2.90           | 23.43             | 2.99            | 18.63           | 20.76            | 22.42          | 30.55           |
| 26               | 172.84                | 0.76             | 3.21          | 0.13            | 2.20             | 1.61           | 14.33             | 1.70            | 20.35           | 20.94            | 14.22          | 25.31           |
| 29               | 109.24                | 0.77             | 2.73          | 0.47            | 5.86             | 1.12           | 10.41             | 1.11            | 24.42           | 25.57            | 9.79           | 27.38           |
| 32               | 64.59                 | 0.39             | 1.53          | 0.29            | 6.30             | 0.41           | 6.57              | 0.50            | 25.84           | 26.84            | 5.76           | 27.45           |
| 35               | 28.82                 | 0.46             | 0.72          | 0.40            | 4.29             | 0.57           | 3.90              | 0.46            | 28.53           | 28.96            | 3.21           | 29.14           |
| 38               | 11.55                 | 0.61             | 0.25          | 0.42            | 3.96             | 0.58           | 2.38              | 0.44            | 31.84           | 32.15            | 1.76           | 32.19           |
| 41               | 10.31                 | 0.54             | 0.19          | 0.47            | 4.24             | 0.71           | 2.03              | 0.41            | 35.20           | 35.49            | 1.70           | 35.53           |

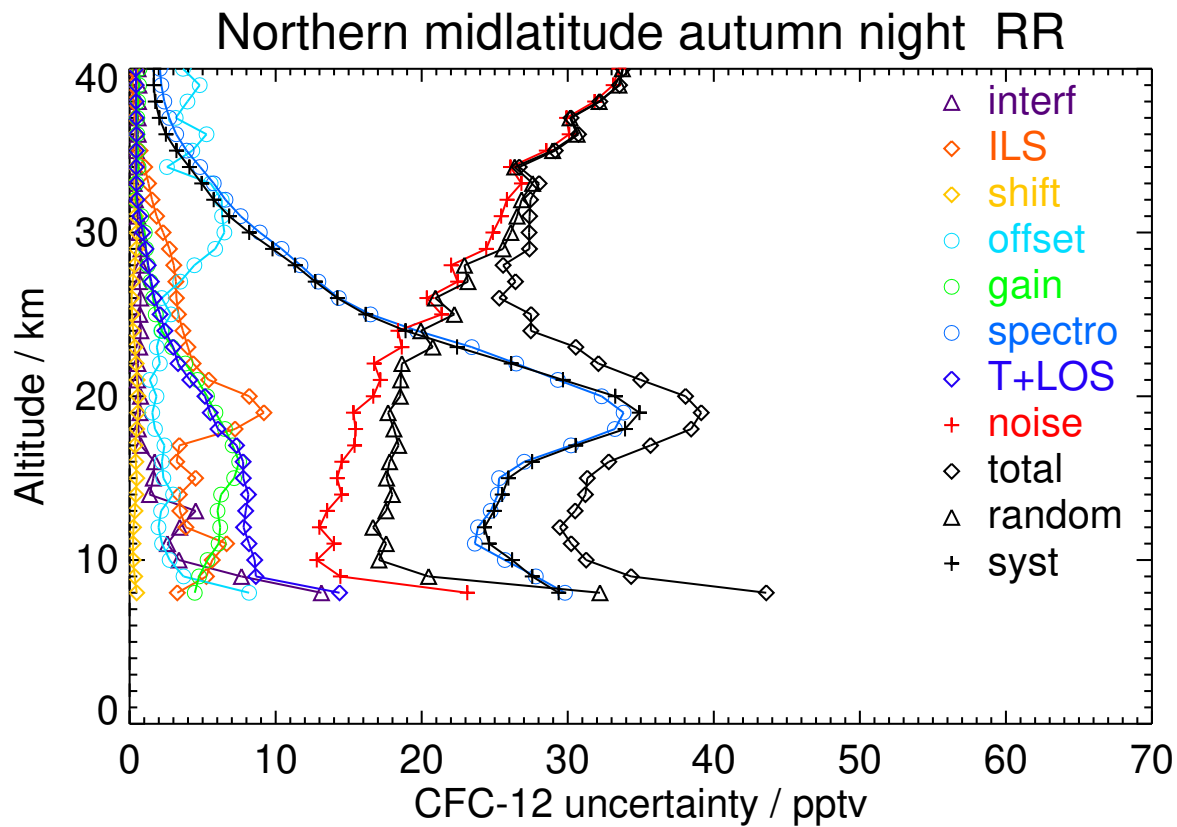

**Figure S50.** V8R\_F-12\_261 Northern midlatitude autumn night

**Table S52.** CFC-12 error budget for Tropics day. All uncertainties are  $1\sigma$ .

| altitude<br>(km) | mean target<br>(pptv) | interf<br>(pptv) | ILS<br>(pptv) | shift<br>(pptv) | offset<br>(pptv) | gain<br>(pptv) | spectro<br>(pptv) | T+LOS<br>(pptv) | noise<br>(pptv) | random<br>(pptv) | syst<br>(pptv) | total<br>(pptv) |
|------------------|-----------------------|------------------|---------------|-----------------|------------------|----------------|-------------------|-----------------|-----------------|------------------|----------------|-----------------|
| 11               | 530.53                | 4.32             | 4.87          | 0.22            | 5.25             | 5.89           | 26.53             | 10.50           | 17.74           | 22.98            | 26.56          | 35.12           |
| 14               | 556.32                | 1.48             | 6.23          | 0.34            | 2.20             | 8.40           | 23.50             | 8.61            | 14.98           | 18.49            | 25.00          | 31.10           |
| 17               | 553.17                | 1.77             | 5.05          | 0.24            | 3.33             | 7.41           | 32.48             | 10.31           | 17.90           | 21.94            | 33.09          | 39.70           |
| 20               | 499.74                | 1.45             | 6.34          | 0.41            | 2.57             | 6.77           | 29.46             | 5.03            | 17.66           | 19.71            | 30.20          | 36.06           |
| 23               | 415.07                | 0.70             | 3.49          | 0.68            | 1.72             | 3.61           | 27.84             | 3.87            | 18.48           | 19.48            | 27.95          | 34.07           |
| 26               | 372.84                | 0.84             | 4.53          | 0.44            | 2.32             | 2.92           | 23.08             | 2.76            | 20.02           | 21.24            | 22.92          | 31.25           |
| 29               | 304.85                | 1.00             | 6.45          | 0.84            | 5.68             | 2.70           | 20.47             | 2.51            | 23.41           | 24.57            | 21.27          | 32.50           |
| 32               | 218.13                | 0.60             | 5.40          | 0.98            | 4.53             | 1.10           | 17.29             | 1.60            | 24.60           | 25.49            | 17.60          | 30.97           |
| 35               | 98.39                 | 0.20             | 2.26          | 0.66            | 3.11             | 1.43           | 11.23             | 0.96            | 25.18           | 25.62            | 11.06          | 27.90           |
| 38               | 25.73                 | 0.28             | 0.35          | 0.41            | 4.07             | 0.83           | 4.94              | 0.78            | 29.03           | 29.39            | 4.66           | 29.76           |
| 41               | -3.74                 | 0.24             | 0.18          | 0.45            | 4.09             | 0.91           | 2.31              | 0.49            | 32.02           | 32.31            | 2.19           | 32.39           |

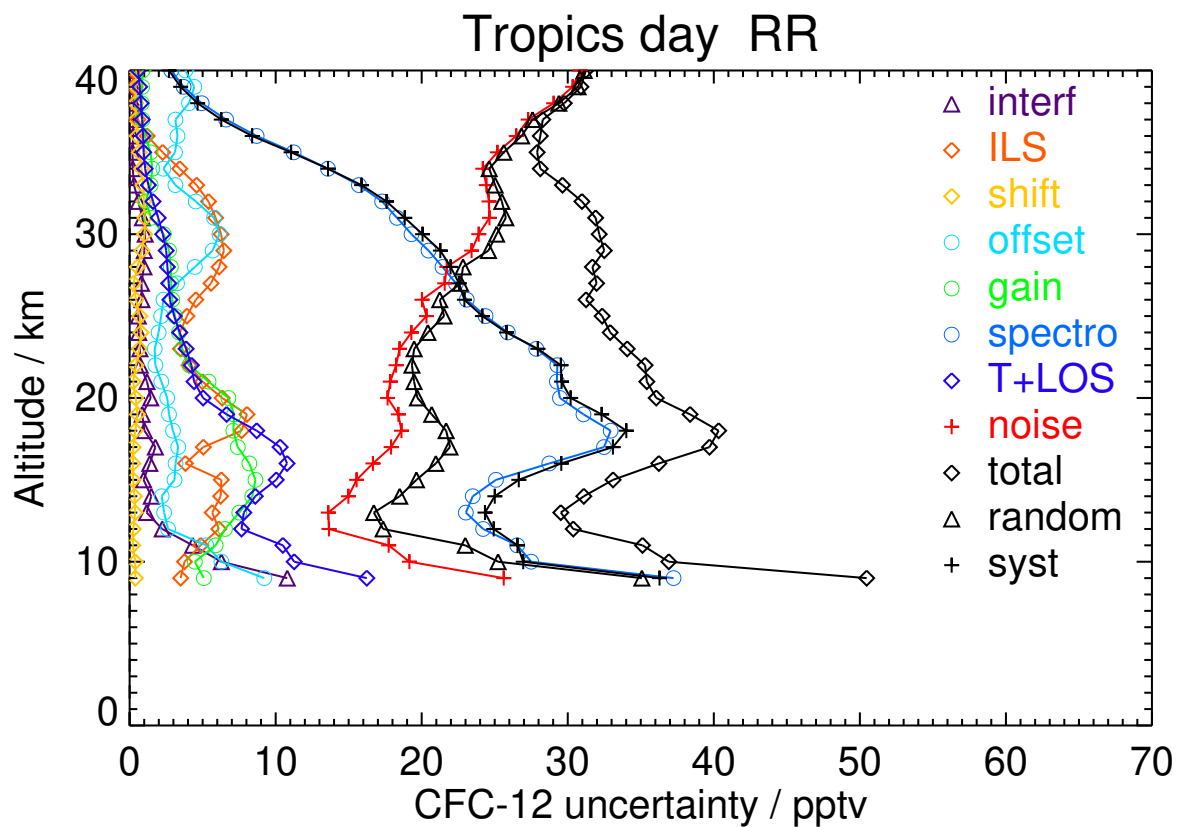

**Figure S51.** V8R\_F-12\_261 Tropics day

Table S53. CFC-12 error budget for Tropics night. All uncertainties are  $1\sigma$ .

| altitude<br>(km) | mean target<br>(pptv) | interf<br>(pptv) | ILS<br>(pptv) | shift<br>(pptv) | offset<br>(pptv) | gain<br>(pptv) | spectro<br>(pptv) | T+LOS<br>(pptv) | noise<br>(pptv) | random<br>(pptv) | syst<br>(pptv) | total<br>(pptv) |
|------------------|-----------------------|------------------|---------------|-----------------|------------------|----------------|-------------------|-----------------|-----------------|------------------|----------------|-----------------|
| 11               | 532.82                | 4.37             | 4.82          | 0.20            | 4.72             | 5.36           | 25.04             | 10.15           | 16.72           | 21.28            | 25.49          | 33.21           |
| 14               | 568.66                | 1.40             | 5.67          | 0.46            | 2.12             | 8.94           | 23.99             | 9.05            | 14.82           | 18.14            | 25.83          | 31.56           |
| 17               | 551.50                | 2.04             | 4.87          | 0.34            | 3.44             | 7.24           | 31.14             | 10.72           | 18.06           | 22.21            | 31.77          | 38.77           |
| 20               | 496.24                | 1.48             | 6.16          | 0.39            | 2.45             | 7.03           | 29.37             | 5.30            | 17.95           | 19.84            | 30.25          | 36.17           |
| 23               | 410.37                | 0.79             | 3.44          | 0.73            | 1.72             | 3.34           | 26.93             | 3.96            | 18.55           | 19.62            | 26.96          | 33.35           |
| 26               | 367.92                | 0.83             | 4.46          | 0.43            | 2.30             | 2.98           | 22.35             | 2.79            | 19.93           | 20.78            | 22.54          | 30.66           |
| 29               | 306.81                | 0.98             | 5.69          | 0.80            | 5.62             | 3.12           | 19.98             | 2.51            | 23.31           | 24.32            | 20.80          | 32.00           |
| 32               | 225.91                | 0.59             | 4.98          | 1.00            | 4.05             | 1.32           | 18.00             | 1.96            | 24.50           | 25.34            | 18.18          | 31.19           |
| 35               | 93.22                 | 0.21             | 2.31          | 0.73            | 2.92             | 1.29           | 11.79             | 1.10            | 25.19           | 25.64            | 11.56          | 28.12           |
| 38               | 15.16                 | 0.33             | 0.21          | 0.41            | 3.91             | 0.72           | 4.40              | 0.69            | 29.26           | 29.58            | 4.11           | 29.87           |
| 41               | -2.26                 | 0.24             | 0.16          | 0.43            | 4.11             | 0.96           | 2.22              | 0.50            | 32.26           | 32.56            | 1.97           | 32.62           |

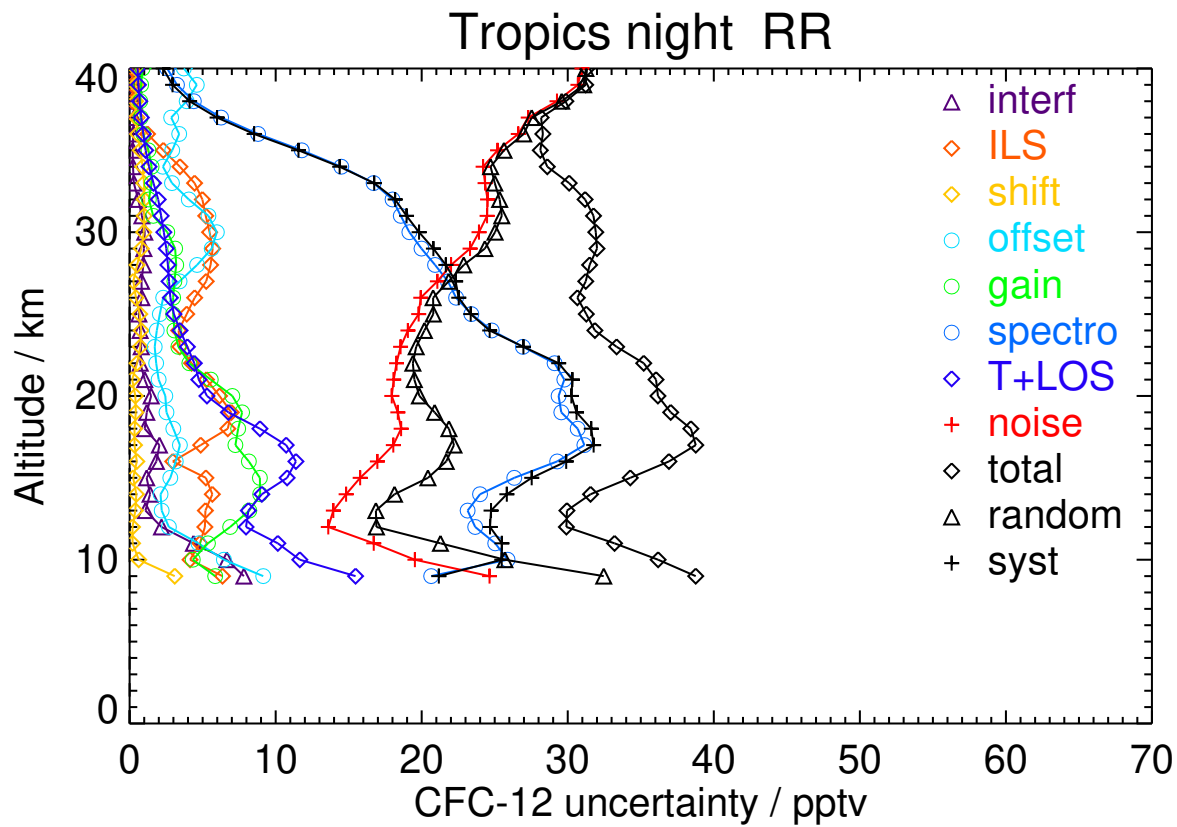

Figure S52. V8R\_F-12\_261 Tropics night

**Table S54.** CFC-12 error budget for Southern midlatitude winter day. All uncertainties are  $1\sigma$ .

| altitude<br>(km) | mean target<br>(pptv) | interf<br>(pptv) | ILS<br>(pptv) | shift<br>(pptv) | offset<br>(pptv) | gain<br>(pptv) | spectro<br>(pptv) | T+LOS<br>(pptv) | noise<br>(pptv) | random<br>(pptv) | syst<br>(pptv) | total<br>(pptv) |
|------------------|-----------------------|------------------|---------------|-----------------|------------------|----------------|-------------------|-----------------|-----------------|------------------|----------------|-----------------|
| 8                | 543.81                | 7.23             | 6.24          | 0.42            | 2.52             | 5.42           | 29.21             | 9.08            | 12.88           | 18.51            | 29.76          | 35.05           |
| 11               | 522.96                | 5.76             | 2.18          | 0.41            | 2.53             | 5.93           | 26.44             | 8.33            | 12.92           | 17.34            | 26.72          | 31.86           |
| 14               | 481.31                | 0.98             | 4.19          | 0.51            | 2.83             | 6.47           | 28.31             | 7.25            | 13.65           | 16.48            | 28.93          | 33.30           |
| 17               | 411.58                | 0.65             | 5.80          | 0.59            | 2.04             | 6.71           | 31.53             | 6.03            | 14.73           | 16.95            | 32.30          | 36.48           |
| 20               | 301.08                | 0.58             | 5.15          | 0.36            | 1.66             | 4.49           | 23.35             | 3.72            | 16.85           | 17.97            | 23.87          | 29.88           |
| 23               | 223.58                | 0.82             | 3.18          | 0.12            | 1.76             | 2.96           | 20.14             | 2.44            | 19.28           | 19.99            | 20.15          | 28.38           |
| 26               | 128.99                | 0.85             | 3.33          | 0.16            | 3.33             | 1.57           | 13.79             | 1.71            | 23.75           | 24.38            | 13.72          | 27.97           |
| 29               | 83.55                 | 0.73             | 2.42          | 0.30            | 7.49             | 0.87           | 8.60              | 1.11            | 28.10           | 29.38            | 8.06           | 30.47           |
| 32               | 56.06                 | 0.71             | 1.70          | 0.21            | 7.55             | 0.47           | 6.47              | 0.64            | 32.08           | 33.21            | 5.41           | 33.64           |
| 35               | 14.83                 | 1.03             | 1.28          | 0.39            | 5.30             | 0.36           | 4.41              | 0.71            | 35.41           | 36.01            | 2.82           | 36.12           |
| 38               | -8.05                 | 1.77             | 1.20          | 0.44            | 5.86             | 0.37           | 2.78              | 0.87            | 39.27           | 39.85            | 1.31           | 39.87           |
| 41               | -8.54                 | 2.37             | 1.43          | 0.41            | 7.71             | 0.46           | 2.12              | 0.96            | 41.96           | 42.80            | 1.34           | 42.82           |

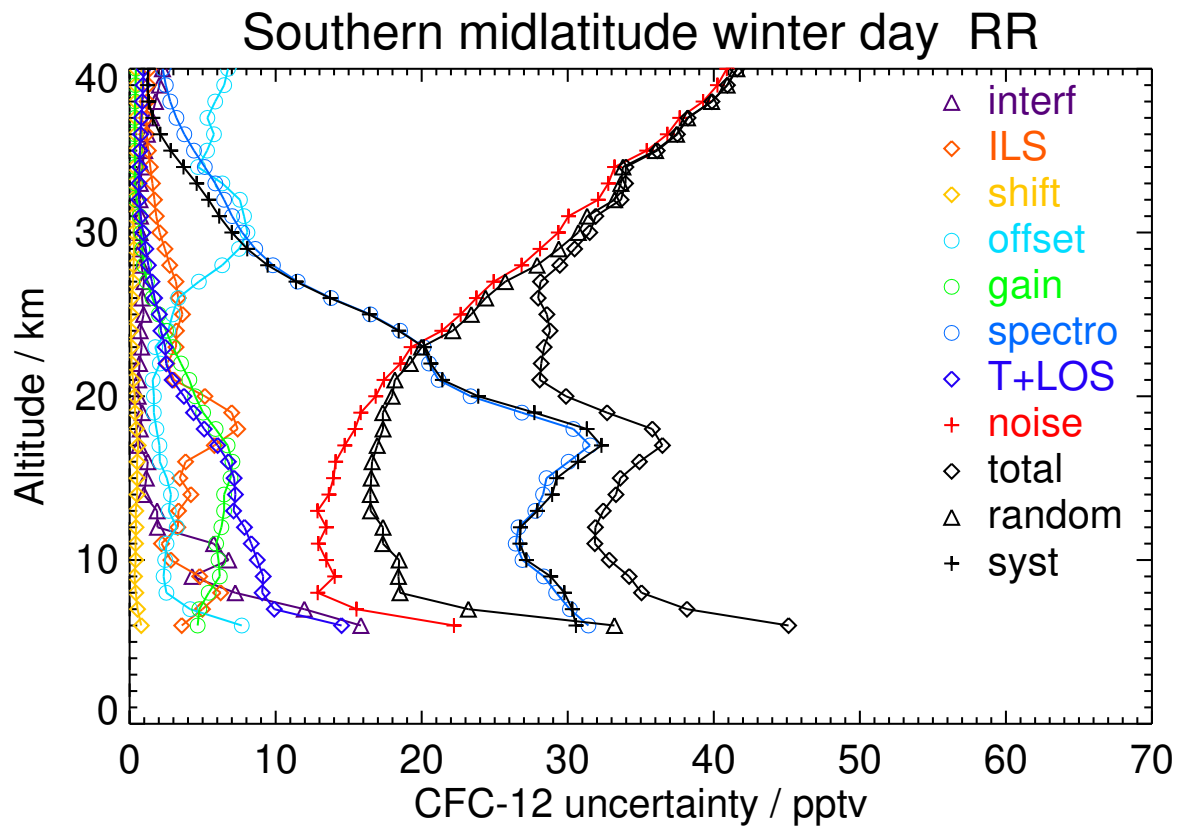

**Figure S53.** V8R\_F-12\_261 Southern midlatitude winter day

**Table S55.** CFC-12 error budget for Southern midlatitude winter night. All uncertainties are  $1\sigma$ .

| altitude<br>(km) | mean target<br>(pptv) | interf<br>(pptv) | ILS<br>(pptv) | shift<br>(pptv) | offset<br>(pptv) | gain<br>(pptv) | spectro<br>(pptv) | T+LOS<br>(pptv) | noise<br>(pptv) | random<br>(pptv) | syst<br>(pptv) | total<br>(pptv) |
|------------------|-----------------------|------------------|---------------|-----------------|------------------|----------------|-------------------|-----------------|-----------------|------------------|----------------|-----------------|
| 8                | 531.86                | 7.36             | 6.00          | 0.34            | 2.26             | 5.15           | 24.19             | 9.21            | 13.03           | 19.13            | 24.41          | 31.01           |
| 11               | 520.82                | 5.24             | 2.48          | 0.63            | 3.24             | 5.81           | 23.96             | 8.60            | 13.02           | 17.75            | 24.11          | 29.93           |
| 14               | 479.55                | 1.22             | 5.03          | 1.41            | 3.73             | 6.05           | 26.22             | 7.23            | 13.80           | 17.37            | 26.60          | 31.77           |
| 17               | 422.61                | 0.59             | 5.15          | 0.47            | 2.23             | 5.97           | 28.68             | 6.13            | 14.95           | 17.26            | 29.22          | 33.93           |
| 20               | 313.28                | 0.54             | 6.21          | 0.42            | 2.05             | 4.23           | 24.96             | 3.99            | 16.90           | 18.38            | 25.45          | 31.40           |
| 23               | 219.03                | 0.54             | 2.78          | 0.24            | 1.95             | 2.58           | 20.17             | 2.55            | 20.03           | 20.77            | 20.04          | 28.86           |
| 26               | 118.62                | 0.56             | 2.70          | 0.12            | 3.07             | 1.53           | 12.93             | 1.54            | 22.85           | 23.38            | 12.82          | 26.66           |
| 29               | 68.20                 | 0.68             | 1.89          | 0.25            | 7.48             | 0.80           | 7.53              | 0.98            | 28.71           | 29.87            | 7.10           | 30.70           |
| 32               | 41.47                 | 0.64             | 1.28          | 0.16            | 7.97             | 0.45           | 5.19              | 0.64            | 31.19           | 32.32            | 4.57           | 32.65           |
| 35               | 16.08                 | 0.59             | 0.70          | 0.32            | 4.27             | 0.26           | 3.50              | 0.53            | 33.76           | 34.14            | 2.44           | 34.23           |
| 38               | 2.34                  | 1.38             | 0.55          | 0.38            | 4.94             | 0.31           | 2.06              | 0.64            | 37.62           | 38.03            | 0.98           | 38.04           |
| 41               | 1.32                  | 1.68             | 0.65          | 0.38            | 7.34             | 0.46           | 1.27              | 0.67            | 40.92           | 41.63            | 0.81           | 41.64           |

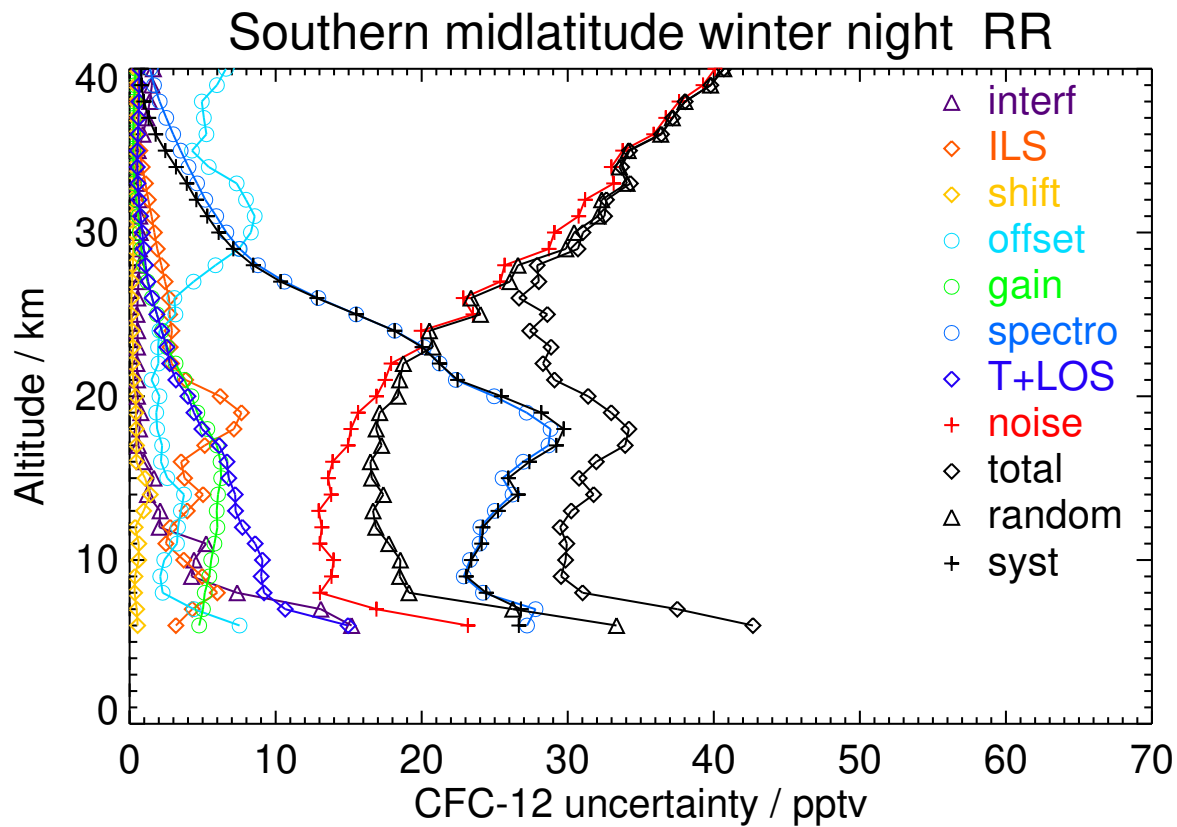

**Figure S54.** V8R\_F-12\_261 Southern midlatitude winter night



**Table S56.** CFC-12 error budget for Southern midlatitude spring day. All uncertainties are  $1\sigma$ .

| altitude<br>(km) | mean target<br>(pptv) | interf<br>(pptv) | ILS<br>(pptv) | shift<br>(pptv) | offset<br>(pptv) | gain<br>(pptv) | spectro<br>(pptv) | T+LOS<br>(pptv) | noise<br>(pptv) | random<br>(pptv) | syst<br>(pptv) | total<br>(pptv) |
|------------------|-----------------------|------------------|---------------|-----------------|------------------|----------------|-------------------|-----------------|-----------------|------------------|----------------|-----------------|
| 8                | 538.55                | 9.20             | 5.24          | 0.44            | 2.16             | 5.97           | 28.41             | 9.37            | 13.26           | 19.66            | 28.93          | 34.98           |
| 11               | 509.49                | 3.44             | 2.67          | 0.35            | 2.08             | 6.36           | 26.41             | 8.14            | 12.46           | 16.79            | 26.47          | 31.35           |
| 14               | 466.85                | 1.87             | 6.30          | 0.43            | 3.04             | 5.77           | 28.57             | 7.41            | 13.59           | 19.55            | 27.56          | 33.79           |
| 17               | 374.07                | 1.80             | 6.27          | 0.24            | 2.01             | 5.55           | 30.25             | 5.90            | 13.96           | 19.02            | 29.33          | 34.96           |
| 20               | 238.76                | 1.44             | 4.82          | 0.28            | 1.66             | 3.73           | 20.80             | 3.37            | 15.01           | 19.14            | 18.57          | 26.67           |
| 23               | 213.62                | 1.23             | 1.94          | 0.22            | 1.60             | 2.31           | 13.65             | 1.78            | 16.97           | 18.94            | 11.49          | 22.15           |
| 26               | 199.77                | 1.01             | 1.80          | 0.29            | 2.37             | 2.03           | 12.47             | 1.28            | 19.84           | 20.38            | 12.24          | 23.77           |
| 29               | 169.27                | 1.38             | 2.74          | 0.50            | 5.50             | 1.44           | 12.30             | 1.25            | 23.28           | 24.38            | 11.93          | 27.14           |
| 32               | 105.52                | 0.50             | 2.33          | 0.42            | 6.13             | 0.65           | 10.31             | 0.83            | 24.63           | 25.63            | 10.02          | 27.52           |
| 35               | 26.40                 | 0.57             | 0.91          | 0.46            | 4.45             | 0.65           | 5.30              | 0.54            | 27.57           | 28.06            | 4.76           | 28.46           |
| 38               | -1.20                 | 0.56             | 0.26          | 0.44            | 3.85             | 0.64           | 2.16              | 0.42            | 30.54           | 30.82            | 1.79           | 30.87           |
| 41               | -6.06                 | 0.54             | 0.15          | 0.48            | 3.82             | 0.71           | 1.70              | 0.40            | 34.02           | 34.27            | 1.40           | 34.30           |

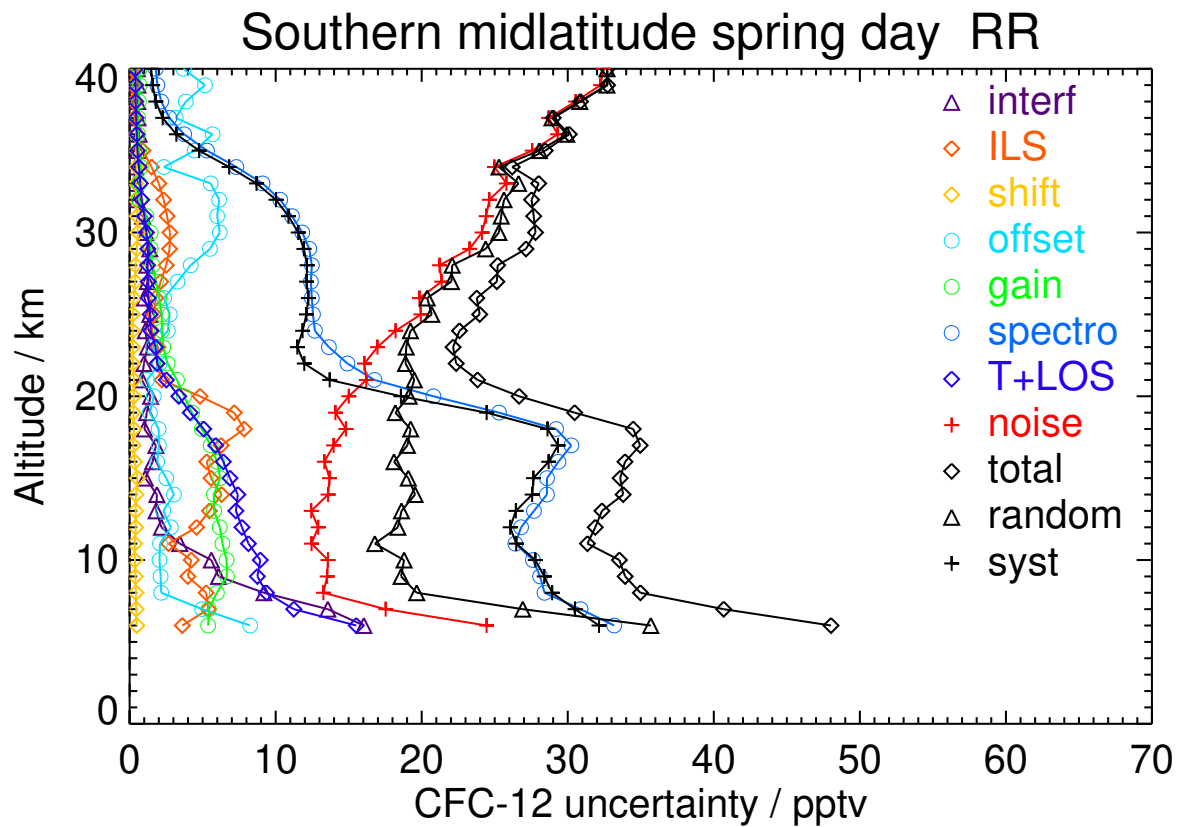

**Figure S55.** V8R\_F-12\_261 Southern midlatitude spring day

**Table S57.** CFC-12 error budget for Southern midlatitude spring night. All uncertainties are  $1\sigma$ .

| altitude<br>(km) | mean target<br>(pptv) | interf<br>(pptv) | ILS<br>(pptv) | shift<br>(pptv) | offset<br>(pptv) | gain<br>(pptv) | spectro<br>(pptv) | T+LOS<br>(pptv) | noise<br>(pptv) | random<br>(pptv) | syst<br>(pptv) | total<br>(pptv) |
|------------------|-----------------------|------------------|---------------|-----------------|------------------|----------------|-------------------|-----------------|-----------------|------------------|----------------|-----------------|
| 8                | 534.78                | 8.50             | 6.03          | 0.41            | 2.46             | 4.76           | 23.81             | 9.15            | 12.79           | 19.30            | 24.07          | 30.85           |
| 11               | 519.01                | 4.73             | 3.03          | 0.97            | 2.72             | 6.06           | 24.06             | 8.15            | 12.85           | 16.99            | 24.46          | 29.78           |
| 14               | 490.84                | 1.86             | 6.36          | 2.31            | 3.75             | 6.02           | 27.30             | 7.61            | 13.58           | 18.55            | 27.25          | 32.97           |
| 17               | 377.44                | 1.14             | 8.38          | 0.58            | 2.00             | 6.83           | 32.53             | 6.39            | 14.48           | 17.88            | 33.33          | 37.83           |
| 20               | 210.62                | 1.21             | 6.69          | 0.44            | 1.86             | 3.61           | 20.79             | 3.39            | 15.81           | 19.62            | 19.29          | 27.51           |
| 23               | 173.31                | 1.07             | 1.78          | 0.13            | 1.59             | 2.13           | 11.99             | 1.49            | 17.73           | 19.45            | 9.66           | 21.72           |
| 26               | 161.49                | 1.05             | 2.29          | 0.15            | 2.23             | 1.95           | 11.51             | 1.15            | 19.93           | 21.27            | 9.69           | 23.37           |
| 29               | 140.12                | 1.19             | 2.69          | 0.52            | 5.59             | 1.28           | 10.75             | 1.10            | 23.51           | 24.80            | 9.81           | 26.67           |
| 32               | 85.54                 | 0.48             | 2.25          | 0.41            | 5.58             | 0.67           | 8.95              | 0.79            | 24.10           | 25.11            | 8.25           | 26.43           |
| 35               | 20.09                 | 0.41             | 0.83          | 0.47            | 3.96             | 0.68           | 4.52              | 0.46            | 27.00           | 27.39            | 4.08           | 27.69           |
| 38               | -4.89                 | 0.67             | 0.22          | 0.44            | 3.58             | 0.67           | 1.92              | 0.42            | 30.16           | 30.41            | 1.63           | 30.46           |
| 41               | -9.19                 | 0.70             | 0.19          | 0.48            | 3.70             | 0.74           | 1.33              | 0.39            | 33.61           | 33.83            | 1.28           | 33.86           |

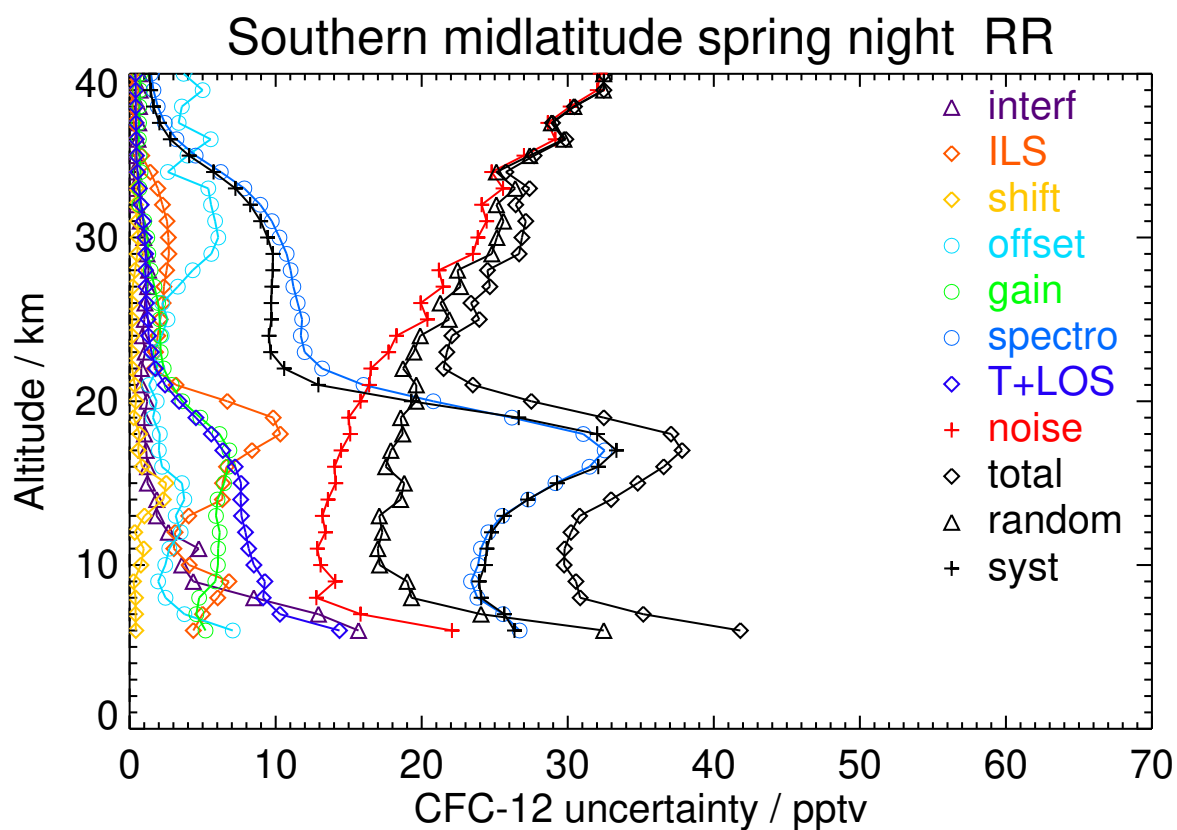

**Figure S56.** V8R\_F-12\_261 Southern midlatitude spring night

**Table S58.** CFC-12 error budget for Southern midlatitude summer day. All uncertainties are  $1\sigma$ .

| altitude<br>(km) | mean target<br>(pptv) | interf<br>(pptv) | ILS<br>(pptv) | shift<br>(pptv) | offset<br>(pptv) | gain<br>(pptv) | spectro<br>(pptv) | T+LOS<br>(pptv) | noise<br>(pptv) | random<br>(pptv) | syst<br>(pptv) | total<br>(pptv) |
|------------------|-----------------------|------------------|---------------|-----------------|------------------|----------------|-------------------|-----------------|-----------------|------------------|----------------|-----------------|
| 8                | 538.18                | 11.35            | 5.34          | 0.53            | 2.51             | 5.05           | 28.04             | 9.64            | 13.41           | 21.81            | 27.80          | 35.33           |
| 11               | 516.63                | 4.24             | 3.44          | 0.37            | 2.15             | 6.53           | 25.69             | 7.65            | 11.72           | 16.76            | 25.54          | 30.55           |
| 14               | 480.37                | 1.65             | 6.98          | 0.47            | 3.33             | 5.81           | 25.43             | 7.02            | 13.11           | 18.85            | 24.68          | 31.05           |
| 17               | 430.03                | 1.05             | 6.27          | 0.32            | 2.37             | 6.38           | 29.96             | 6.46            | 14.29           | 18.17            | 30.00          | 35.08           |
| 20               | 327.39                | 1.14             | 7.16          | 0.37            | 2.02             | 4.21           | 27.45             | 4.48            | 15.49           | 21.90            | 24.66          | 32.98           |
| 23               | 233.19                | 0.80             | 3.61          | 0.23            | 1.91             | 2.63           | 18.26             | 2.54            | 17.62           | 19.07            | 17.64          | 25.98           |
| 26               | 158.72                | 1.08             | 3.32          | 0.21            | 2.03             | 1.32           | 13.47             | 1.66            | 18.59           | 19.12            | 13.51          | 23.41           |
| 29               | 82.54                 | 1.49             | 2.79          | 0.49            | 5.07             | 0.37           | 8.15              | 1.06            | 22.66           | 23.52            | 8.01           | 24.85           |
| 32               | 46.52                 | 0.92             | 0.82          | 0.28            | 5.57             | 0.27           | 4.07              | 0.42            | 22.49           | 23.25            | 3.88           | 23.57           |
| 35               | 6.11                  | 0.48             | 0.34          | 0.45            | 3.85             | 0.67           | 2.49              | 0.42            | 24.49           | 24.86            | 2.09           | 24.94           |
| 38               | 1.40                  | 0.27             | 0.23          | 0.37            | 3.52             | 0.79           | 1.43              | 0.44            | 26.94           | 27.20            | 1.25           | 27.23           |
| 41               | 11.70                 | 0.33             | 0.12          | 0.43            | 3.47             | 0.93           | 1.88              | 0.39            | 30.08           | 30.30            | 1.91           | 30.36           |

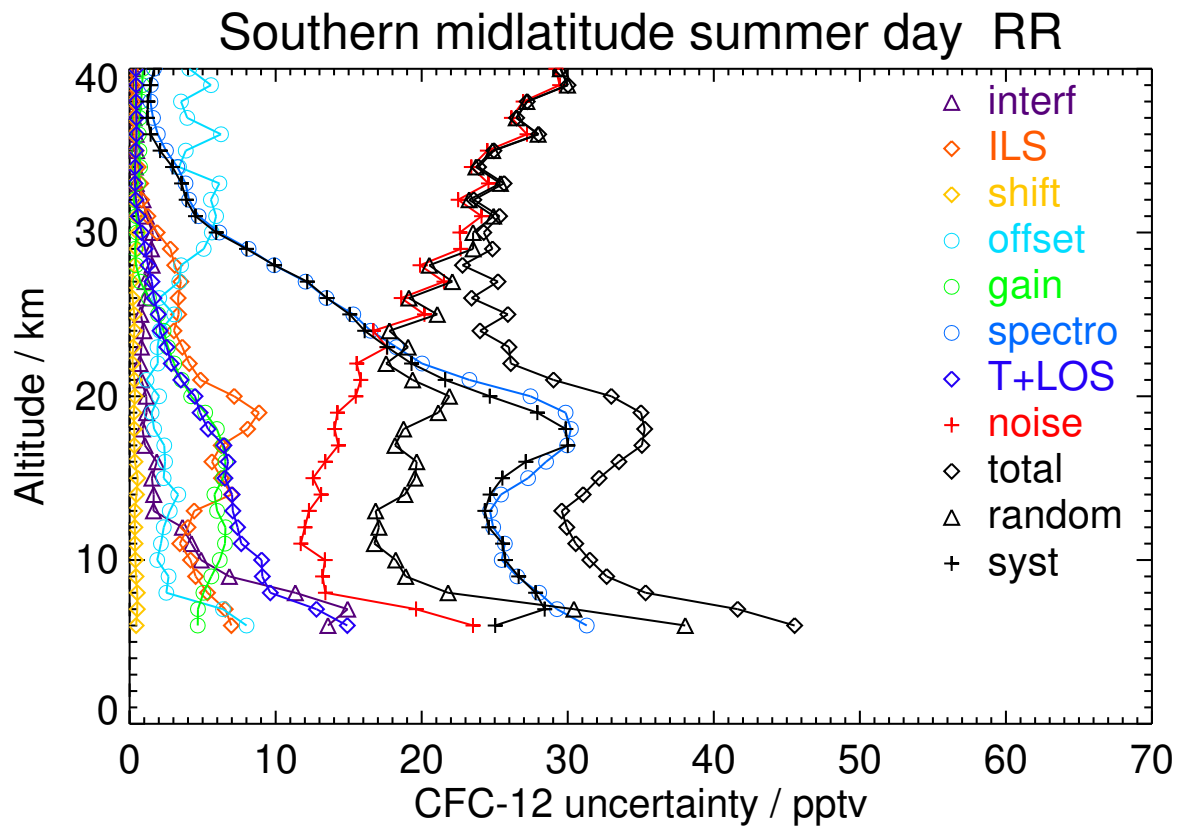

**Figure S57.** V8R\_F-12\_261 Southern midlatitude summer day

**Table S59.** CFC-12 error budget for Southern midlatitude summer night. All uncertainties are  $1\sigma$ .

| altitude<br>(km) | mean target<br>(pptv) | interf<br>(pptv) | ILS<br>(pptv) | shift<br>(pptv) | offset<br>(pptv) | gain<br>(pptv) | spectro<br>(pptv) | T+LOS<br>(pptv) | noise<br>(pptv) | random<br>(pptv) | syst<br>(pptv) | total<br>(pptv) |
|------------------|-----------------------|------------------|---------------|-----------------|------------------|----------------|-------------------|-----------------|-----------------|------------------|----------------|-----------------|
| 8                | 533.21                | 10.73            | 7.55          | 3.31            | 2.16             | 4.69           | 25.35             | 9.41            | 12.91           | 21.75            | 25.19          | 33.28           |
| 11               | 509.01                | 4.09             | 4.56          | 0.59            | 2.69             | 5.70           | 24.68             | 7.75            | 11.80           | 16.36            | 24.87          | 29.77           |
| 14               | 481.96                | 1.71             | 9.10          | 1.21            | 3.46             | 6.36           | 29.47             | 7.06            | 13.07           | 19.73            | 28.97          | 35.05           |
| 17               | 408.48                | 1.51             | 7.20          | 0.42            | 2.52             | 6.23           | 29.61             | 5.96            | 14.20           | 19.83            | 28.64          | 34.83           |
| 20               | 326.88                | 1.00             | 5.98          | 0.42            | 2.14             | 4.73           | 28.21             | 4.34            | 15.31           | 19.65            | 26.96          | 33.36           |
| 23               | 225.89                | 0.92             | 3.09          | 0.24            | 1.90             | 2.71           | 17.19             | 2.46            | 17.55           | 19.15            | 16.24          | 25.11           |
| 26               | 162.15                | 1.33             | 3.34          | 0.25            | 2.10             | 1.59           | 13.61             | 1.68            | 18.49           | 19.08            | 13.63          | 23.45           |
| 29               | 85.49                 | 1.48             | 2.96          | 0.52            | 5.17             | 0.52           | 8.22              | 1.07            | 22.43           | 23.28            | 8.25           | 24.70           |
| 32               | 39.40                 | 0.80             | 1.13          | 0.36            | 4.63             | 0.48           | 4.24              | 0.40            | 21.78           | 22.36            | 4.02           | 22.72           |
| 35               | 5.89                  | 0.45             | 0.40          | 0.43            | 3.25             | 0.62           | 2.08              | 0.43            | 24.02           | 24.30            | 1.61           | 24.35           |
| 38               | -0.24                 | 0.26             | 0.31          | 0.36            | 3.17             | 0.82           | 1.62              | 0.40            | 26.46           | 26.67            | 1.53           | 26.71           |
| 41               | -4.70                 | 0.43             | 0.16          | 0.44            | 3.17             | 0.95           | 1.89              | 0.39            | 29.31           | 29.51            | 1.88           | 29.57           |

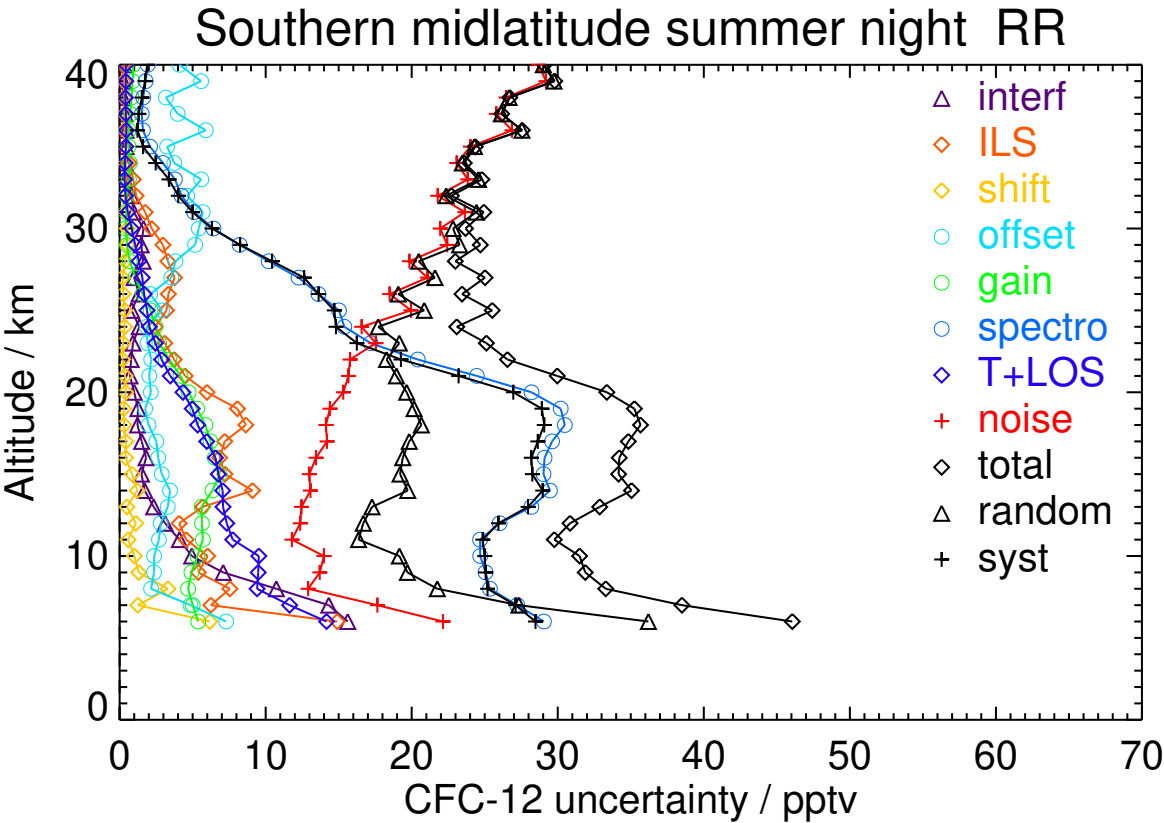

**Figure S58.** V8R\_F-12\_261 Southern midlatitude summer night

**Table S60.** CFC-12 error budget for Southern midlatitude autumn day. All uncertainties are  $1\sigma$ .

| altitude<br>(km) | mean target<br>(pptv) | interf<br>(pptv) | ILS<br>(pptv) | shift<br>(pptv) | offset<br>(pptv) | gain<br>(pptv) | spectro<br>(pptv) | T+LOS<br>(pptv) | noise<br>(pptv) | random<br>(pptv) | syst<br>(pptv) | total<br>(pptv) |
|------------------|-----------------------|------------------|---------------|-----------------|------------------|----------------|-------------------|-----------------|-----------------|------------------|----------------|-----------------|
| 8                | 531.95                | 8.99             | 4.58          | 0.46            | 2.24             | 5.32           | 27.82             | 9.30            | 12.59           | 18.91            | 28.23          | 33.98           |
| 11               | 513.46                | 4.27             | 3.49          | 0.38            | 1.98             | 5.75           | 24.18             | 7.59            | 11.88           | 15.95            | 24.42          | 29.17           |
| 14               | 503.18                | 1.12             | 4.52          | 0.54            | 2.59             | 6.67           | 27.38             | 7.08            | 12.99           | 16.46            | 27.77          | 32.28           |
| 17               | 431.66                | 0.82             | 6.02          | 0.28            | 1.93             | 6.51           | 30.00             | 5.88            | 14.01           | 16.45            | 30.72          | 34.85           |
| 20               | 321.87                | 0.75             | 4.94          | 0.37            | 1.62             | 4.57           | 26.29             | 3.95            | 15.75           | 17.30            | 26.53          | 31.67           |
| 23               | 208.64                | 0.91             | 3.12          | 0.16            | 1.58             | 2.67           | 19.06             | 2.50            | 17.60           | 18.62            | 18.78          | 26.44           |
| 26               | 129.32                | 0.64             | 2.65          | 0.13            | 2.64             | 1.37           | 12.31             | 1.44            | 21.33           | 21.89            | 12.06          | 25.00           |
| 29               | 70.25                 | 0.78             | 2.05          | 0.41            | 6.08             | 0.78           | 7.91              | 0.93            | 24.59           | 25.61            | 7.38           | 26.65           |
| 32               | 30.51                 | 0.43             | 1.09          | 0.21            | 6.27             | 0.28           | 4.53              | 0.39            | 27.07           | 27.93            | 3.80           | 28.18           |
| 35               | 3.46                  | 0.48             | 0.44          | 0.38            | 4.41             | 0.43           | 2.25              | 0.40            | 30.08           | 30.46            | 1.57           | 30.50           |
| 38               | -2.92                 | 0.72             | 0.23          | 0.41            | 4.14             | 0.48           | 1.65              | 0.39            | 33.74           | 34.03            | 1.18           | 34.05           |
| 41               | 2.28                  | 0.84             | 0.16          | 0.45            | 5.14             | 0.56           | 1.54              | 0.41            | 37.34           | 37.73            | 1.19           | 37.74           |

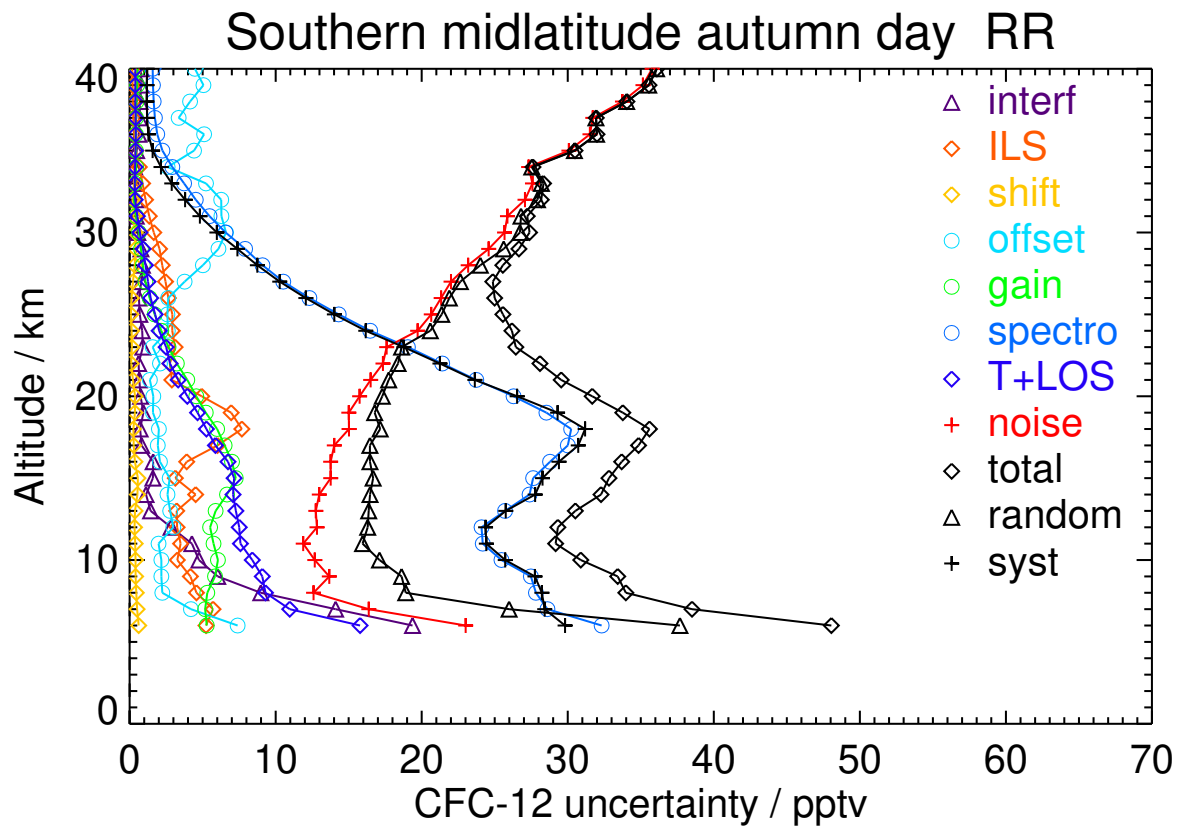

**Figure S59.** V8R\_F-12\_261 Southern midlatitude autumn day

**Table S61.** CFC-12 error budget for Southern midlatitude autumn night. All uncertainties are  $1\sigma$ .

| altitude<br>(km) | mean target<br>(pptv) | interf<br>(pptv) | ILS<br>(pptv) | shift<br>(pptv) | offset<br>(pptv) | gain<br>(pptv) | spectro<br>(pptv) | T+LOS<br>(pptv) | noise<br>(pptv) | random<br>(pptv) | syst<br>(pptv) | total<br>(pptv) |
|------------------|-----------------------|------------------|---------------|-----------------|------------------|----------------|-------------------|-----------------|-----------------|------------------|----------------|-----------------|
| 8                | 526.13                | 10.50            | 6.77          | 0.49            | 2.30             | 4.77           | 24.00             | 9.32            | 13.21           | 21.02            | 24.09          | 31.97           |
| 11               | 518.39                | 4.22             | 4.44          | 0.57            | 2.57             | 5.43           | 23.58             | 7.82            | 12.39           | 16.21            | 24.12          | 29.06           |
| 14               | 504.05                | 1.43             | 5.54          | 0.59            | 3.36             | 6.44           | 28.05             | 7.29            | 13.65           | 17.20            | 28.56          | 33.34           |
| 17               | 439.48                | 0.80             | 6.35          | 0.27            | 2.35             | 6.82           | 32.01             | 6.21            | 14.60           | 17.18            | 32.77          | 37.00           |
| 20               | 325.06                | 0.53             | 6.04          | 0.48            | 1.96             | 4.65           | 26.63             | 4.31            | 16.12           | 17.87            | 27.03          | 32.40           |
| 23               | 204.59                | 0.55             | 2.90          | 0.21            | 1.78             | 2.52           | 18.93             | 2.54            | 18.60           | 19.54            | 18.63          | 27.00           |
| 26               | 125.44                | 0.80             | 2.32          | 0.14            | 2.32             | 1.38           | 12.21             | 1.42            | 20.29           | 21.01            | 11.60          | 24.00           |
| 29               | 61.87                 | 0.89             | 1.85          | 0.40            | 6.11             | 0.72           | 7.49              | 0.87            | 25.14           | 26.22            | 6.61           | 27.04           |
| 32               | 30.15                 | 0.62             | 0.99          | 0.22            | 5.33             | 0.36           | 4.24              | 0.41            | 25.49           | 26.24            | 3.07           | 26.41           |
| 35               | 2.90                  | 0.55             | 0.57          | 0.40            | 2.99             | 0.44           | 2.57              | 0.42            | 28.19           | 28.44            | 1.49           | 28.48           |
| 38               | -3.36                 | 0.91             | 0.24          | 0.41            | 3.22             | 0.57           | 1.74              | 0.42            | 31.96           | 32.17            | 1.14           | 32.19           |
| 41               | -8.89                 | 1.01             | 0.23          | 0.46            | 4.39             | 0.63           | 1.44              | 0.40            | 35.76           | 36.07            | 1.16           | 36.08           |

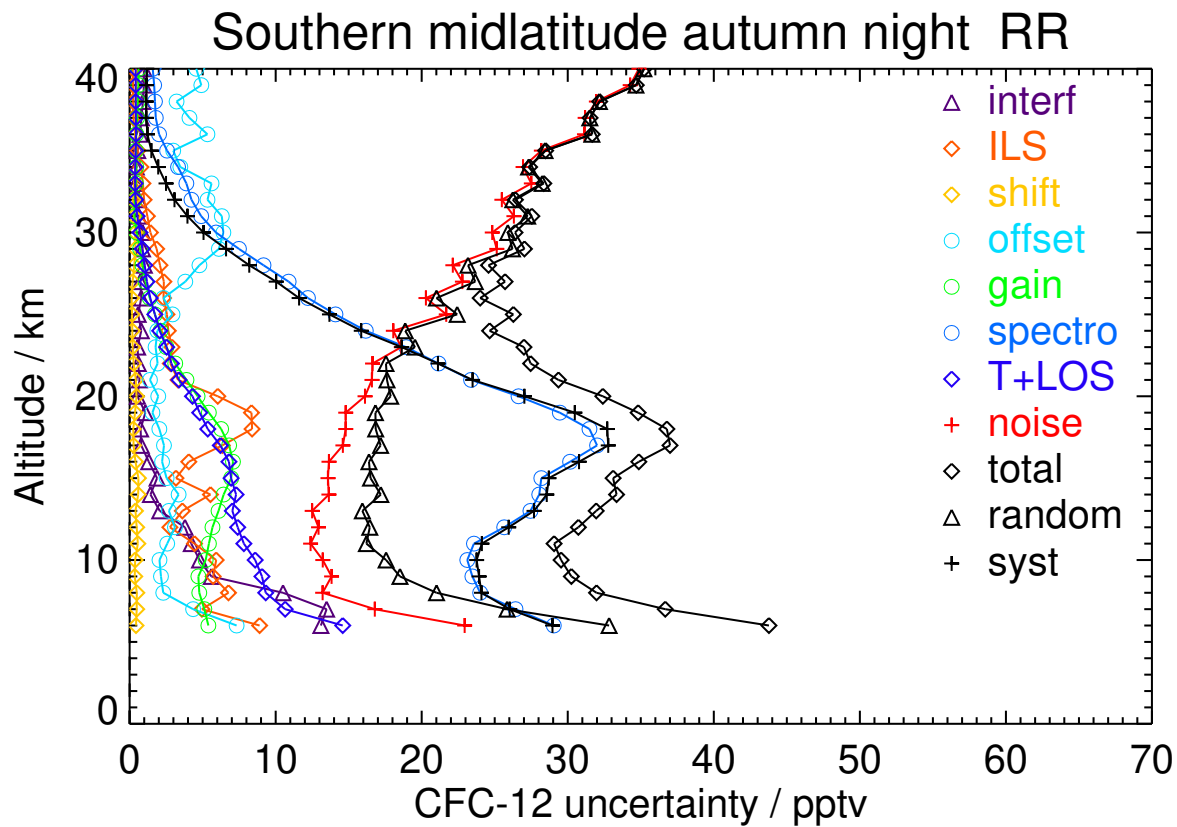

**Figure S60.** V8R\_F-12\_261 Southern midlatitude autumn night

**Table S62.** CFC-12 error budget for Southern polar winter day. All uncertainties are  $1\sigma$ .

| altitude<br>(km) | mean target<br>(pptv) | interf<br>(pptv) | ILS<br>(pptv) | shift<br>(pptv) | offset<br>(pptv) | gain<br>(pptv) | spectro<br>(pptv) | T+LOS<br>(pptv) | noise<br>(pptv) | random<br>(pptv) | syst<br>(pptv) | total<br>(pptv) |
|------------------|-----------------------|------------------|---------------|-----------------|------------------|----------------|-------------------|-----------------|-----------------|------------------|----------------|-----------------|
| 5                | 540.28                | 19.11            | 4.65          | 0.77            | 8.90             | 4.98           | 36.63             | 17.89           | 25.44           | 41.12            | 33.32          | 52.93           |
| 8                | 541.89                | 4.39             | 5.61          | 0.33            | 2.68             | 7.32           | 26.84             | 8.82            | 13.75           | 18.98            | 27.19          | 33.15           |
| 11               | 525.09                | 2.46             | 2.17          | 0.55            | 3.18             | 6.59           | 27.26             | 8.83            | 13.95           | 18.55            | 27.13          | 32.86           |
| 14               | 433.44                | 1.00             | 6.03          | 0.70            | 2.55             | 7.17           | 34.06             | 8.80            | 14.99           | 19.24            | 34.46          | 39.47           |
| 17               | 261.47                | 0.55             | 7.61          | 0.34            | 1.77             | 4.57           | 29.10             | 5.56            | 16.61           | 18.63            | 29.81          | 35.16           |
| 20               | 129.45                | 0.56             | 4.49          | 0.47            | 1.68             | 2.09           | 17.45             | 3.00            | 19.60           | 20.77            | 17.14          | 26.93           |
| 23               | 52.60                 | 0.91             | 3.15          | 0.15            | 2.33             | 0.86           | 9.88              | 1.65            | 22.02           | 22.77            | 9.15           | 24.54           |
| 26               | 12.17                 | 0.69             | 1.52          | 0.14            | 5.28             | 0.37           | 4.26              | 0.73            | 27.38           | 28.11            | 3.03           | 28.27           |
| 29               | 7.58                  | 1.54             | 1.88          | 0.25            | 9.46             | 0.51           | 3.00              | 1.12            | 29.79           | 31.48            | 1.65           | 31.52           |
| 32               | 10.98                 | 1.18             | 1.34          | 0.17            | 7.97             | 0.40           | 2.24              | 0.96            | 33.35           | 34.39            | 1.56           | 34.43           |
| 35               | 6.30                  | 1.50             | 1.13          | 0.36            | 5.80             | 0.36           | 1.96              | 0.95            | 35.51           | 36.07            | 1.47           | 36.10           |
| 38               | -4.48                 | 1.71             | 1.01          | 0.42            | 5.94             | 0.36           | 1.80              | 0.89            | 38.49           | 39.03            | 1.36           | 39.05           |
| 41               | 5.54                  | 1.60             | 0.89          | 0.43            | 7.12             | 0.34           | 1.63              | 0.80            | 41.02           | 41.70            | 1.30           | 41.72           |

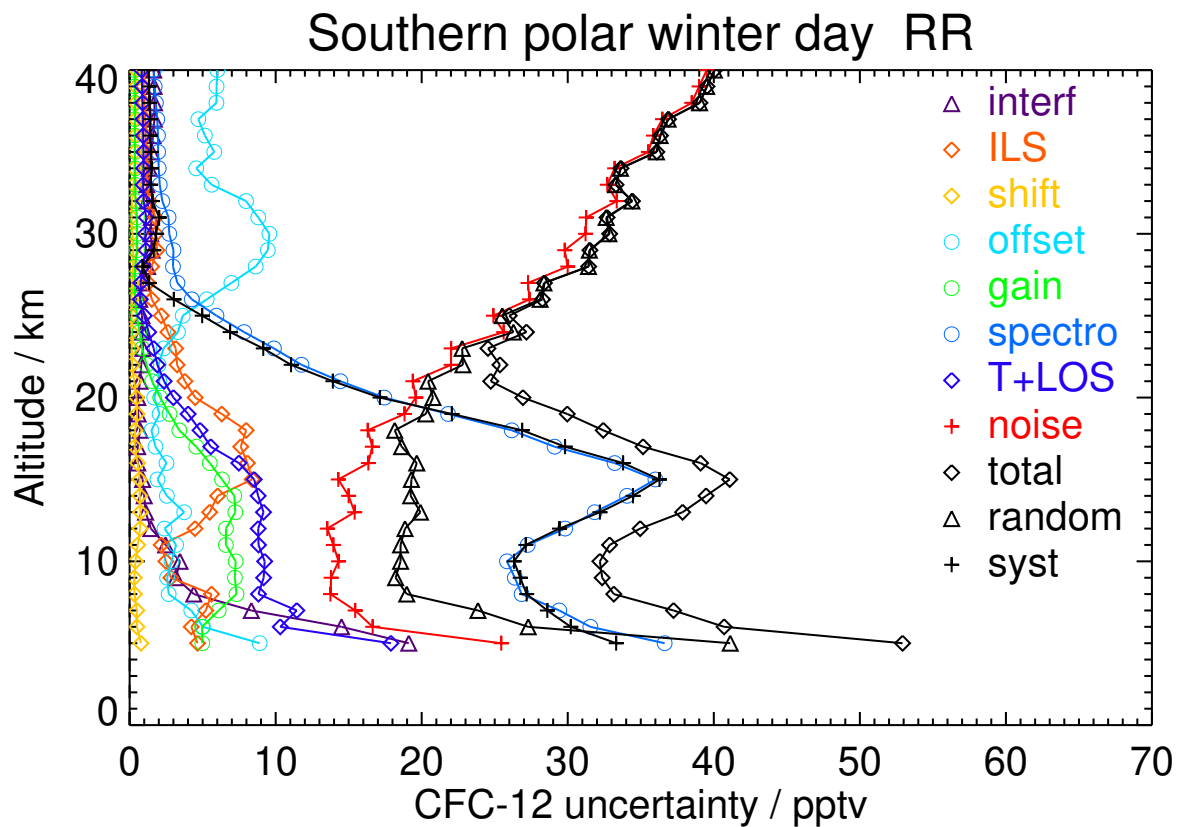

**Figure S61.** V8R\_F-12\_261 Southern polar winter day

Table S63. CFC-12 error budget for Southern polar winter night. All uncertainties are 1 $\sigma$ .

| altitude<br>(km) | mean target<br>(pptv) | interf<br>(pptv) | ILS<br>(pptv) | shift<br>(pptv) | offset<br>(pptv) | gain<br>(pptv) | spectro<br>(pptv) | T+LOS<br>(pptv) | noise<br>(pptv) | random<br>(pptv) | syst<br>(pptv) | total<br>(pptv) |
|------------------|-----------------------|------------------|---------------|-----------------|------------------|----------------|-------------------|-----------------|-----------------|------------------|----------------|-----------------|
| 5                | 537.96                | 18.09            | 2.22          | 0.77            | 9.06             | 4.45           | 31.98             | 18.05           | 25.16           | 37.67            | 31.58          | 49.16           |
| 8                | 525.62                | 2.49             | 8.32          | 0.30            | 2.60             | 6.16           | 19.03             | 9.19            | 14.02           | 18.24            | 20.75          | 27.63           |
| 11               | 525.80                | 3.52             | 2.51          | 0.75            | 3.25             | 6.91           | 23.11             | 8.76            | 14.04           | 18.34            | 23.43          | 29.76           |
| 14               | 456.08                | 0.91             | 6.51          | 0.64            | 2.07             | 7.57           | 28.69             | 8.59            | 14.49           | 18.86            | 29.26          | 34.81           |
| 17               | 291.27                | 0.60             | 8.49          | 0.63            | 1.51             | 4.69           | 28.25             | 5.95            | 15.78           | 17.79            | 29.38          | 34.35           |
| 20               | 145.99                | 0.59             | 6.18          | 0.44            | 1.58             | 2.19           | 19.56             | 3.29            | 18.54           | 19.84            | 19.74          | 27.99           |
| 23               | 49.60                 | 0.90             | 3.22          | 0.22            | 2.07             | 0.65           | 9.54              | 1.60            | 21.42           | 21.97            | 9.26           | 23.84           |
| 26               | 22.04                 | 0.77             | 1.68          | 0.15            | 4.90             | 0.41           | 4.74              | 0.68            | 27.28           | 27.99            | 3.36           | 28.19           |
| 29               | 0.64                  | 1.19             | 1.35          | 0.31            | 9.38             | 0.25           | 3.04              | 0.79            | 30.17           | 31.79            | 0.86           | 31.81           |
| 32               | -1.89                 | 0.90             | 1.10          | 0.11            | 8.71             | 0.24           | 2.31              | 0.69            | 33.43           | 34.66            | 0.62           | 34.66           |
| 35               | -5.67                 | 0.94             | 0.87          | 0.35            | 5.38             | 0.32           | 1.98              | 0.67            | 35.05           | 35.55            | 0.68           | 35.55           |
| 38               | -5.60                 | 1.13             | 0.83          | 0.42            | 5.58             | 0.40           | 1.79              | 0.66            | 38.00           | 38.48            | 0.86           | 38.49           |
| 41               | -3.94                 | 1.14             | 0.85          | 0.43            | 7.26             | 0.46           | 1.83              | 0.66            | 40.72           | 41.42            | 1.05           | 41.43           |

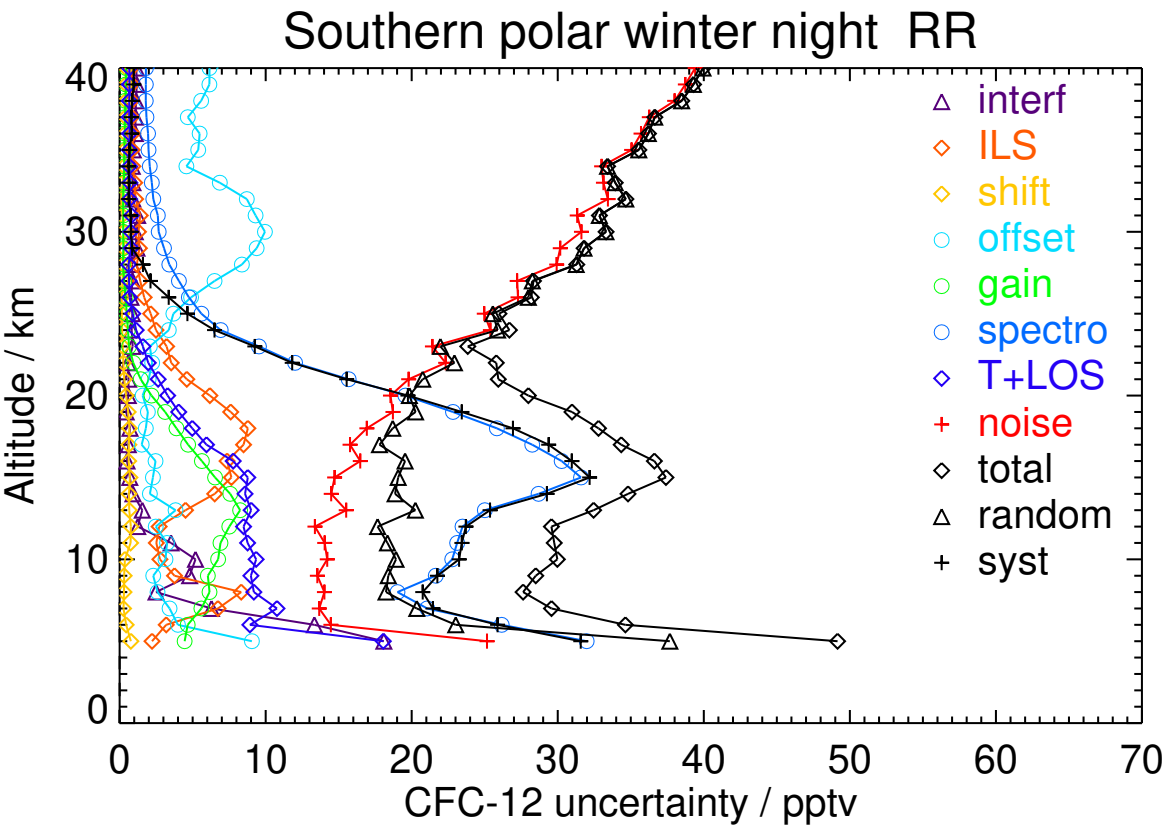

Figure S62. V8R\_F-12\_261 Southern polar winter night



**Table S64.** CFC-12 error budget for Southern polar spring day. All uncertainties are  $1\sigma$ .

| altitude<br>(km) | mean target<br>(pptv) | interf<br>(pptv) | ILS<br>(pptv) | shift<br>(pptv) | offset<br>(pptv) | gain<br>(pptv) | spectro<br>(pptv) | T+LOS<br>(pptv) | noise<br>(pptv) | random<br>(pptv) | syst<br>(pptv) | total<br>(pptv) |
|------------------|-----------------------|------------------|---------------|-----------------|------------------|----------------|-------------------|-----------------|-----------------|------------------|----------------|-----------------|
| 5                | 524.23                | 17.02            | 5.84          | 0.45            | 8.08             | 4.68           | 31.58             | 15.91           | 23.76           | 36.17            | 30.30          | 47.18           |
| 8                | 540.30                | 6.80             | 7.66          | 0.37            | 2.41             | 8.33           | 26.11             | 9.49            | 14.53           | 22.22            | 25.88          | 34.11           |
| 11               | 511.15                | 2.49             | 4.94          | 0.47            | 3.38             | 7.67           | 34.16             | 9.70            | 14.42           | 20.87            | 33.69          | 39.63           |
| 14               | 371.53                | 1.30             | 10.18         | 0.36            | 2.58             | 5.15           | 29.97             | 8.01            | 14.46           | 21.80            | 28.89          | 36.19           |
| 17               | 252.79                | 1.13             | 10.06         | 0.43            | 2.08             | 3.65           | 27.10             | 4.99            | 15.13           | 21.87            | 25.11          | 33.30           |
| 20               | 145.41                | 1.08             | 4.91          | 0.22            | 1.14             | 2.83           | 12.99             | 2.32            | 16.68           | 19.42            | 10.47          | 22.06           |
| 23               | 122.03                | 1.87             | 2.72          | 0.24            | 2.11             | 2.26           | 11.88             | 1.45            | 16.73           | 19.65            | 7.58           | 21.06           |
| 26               | 108.84                | 1.63             | 1.57          | 0.23            | 3.35             | 1.30           | 9.06              | 1.08            | 22.01           | 23.48            | 5.89           | 24.21           |
| 29               | 93.78                 | 1.87             | 2.24          | 0.63            | 5.77             | 1.33           | 8.53              | 1.02            | 21.98           | 23.77            | 5.99           | 24.51           |
| 32               | 50.98                 | 0.28             | 1.77          | 0.43            | 6.09             | 0.68           | 6.47              | 0.64            | 23.92           | 25.08            | 5.11           | 25.60           |
| 35               | 15.46                 | 0.46             | 0.85          | 0.46            | 6.45             | 0.69           | 3.55              | 0.50            | 27.44           | 28.32            | 2.67           | 28.44           |
| 38               | 0.57                  | 0.46             | 0.32          | 0.39            | 5.77             | 0.63           | 1.67              | 0.43            | 30.00           | 30.58            | 1.42           | 30.62           |
| 41               | -8.85                 | 0.44             | 0.16          | 0.47            | 4.99             | 0.62           | 1.32              | 0.43            | 33.44           | 33.83            | 1.16           | 33.85           |

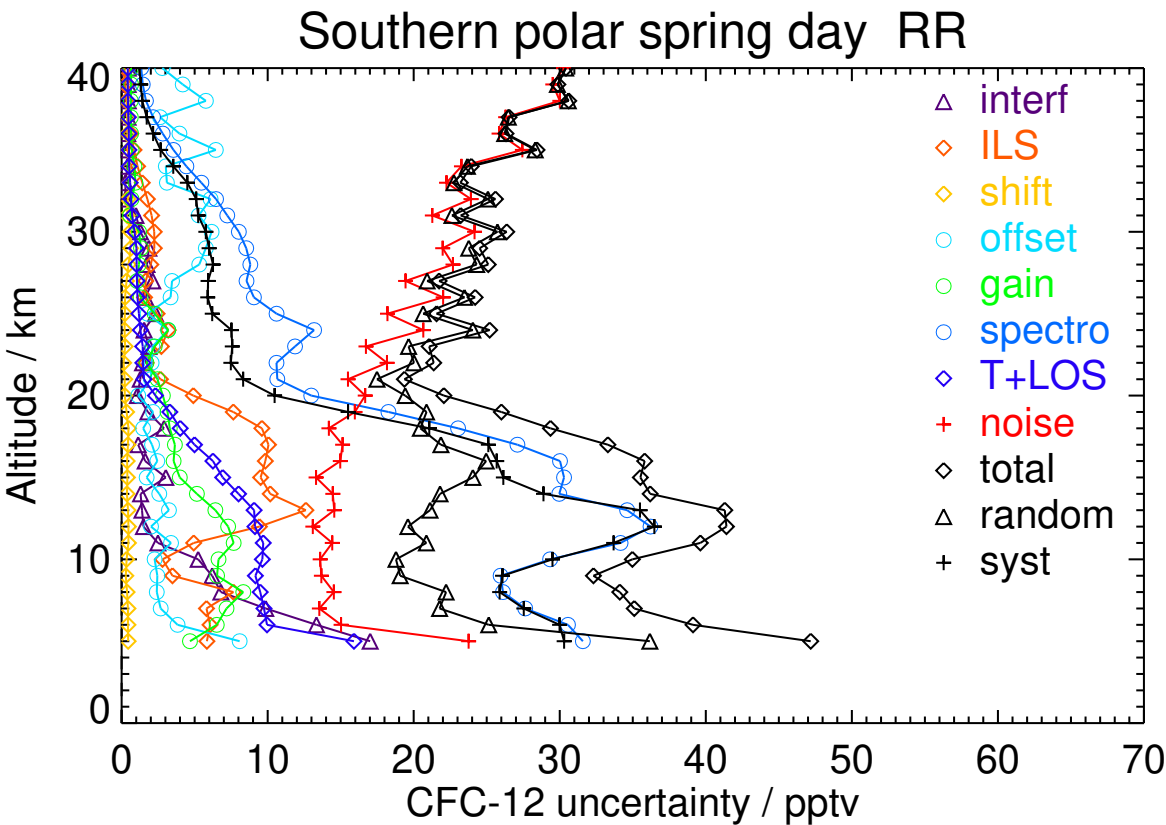

**Figure S63.** V8R\_F-12\_261 Southern polar spring day

Table S65. CFC-12 error budget for Southern polar spring night. All uncertainties are 1σ.

| altitude<br>(km) | mean target<br>(pptv) | interf<br>(pptv) | ILS<br>(pptv) | shift<br>(pptv) | offset<br>(pptv) | gain<br>(pptv) | spectro<br>(pptv) | T+LOS<br>(pptv) | noise<br>(pptv) | random<br>(pptv) | syst<br>(pptv) | total<br>(pptv) |
|------------------|-----------------------|------------------|---------------|-----------------|------------------|----------------|-------------------|-----------------|-----------------|------------------|----------------|-----------------|
| 5                | 534.40                | 18.09            | 6.37          | 0.64            | 7.73             | 5.35           | 30.86             | 15.84           | 23.45           | 39.42            | 25.61          | 47.00           |
| 8                | 546.52                | 5.56             | 7.24          | 0.85            | 2.08             | 6.48           | 29.80             | 9.90            | 15.19           | 28.88            | 22.64          | 36.70           |
| 11               | 502.71                | 2.47             | 4.06          | 0.43            | 3.78             | 7.18           | 34.07             | 8.92            | 14.12           | 27.15            | 28.13          | 39.09           |
| 14               | 384.00                | 1.04             | 10.91         | 0.45            | 2.93             | 5.72           | 34.93             | 7.72            | 14.18           | 26.98            | 30.24          | 40.53           |
| 17               | 253.43                | 1.05             | 8.05          | 0.34            | 2.40             | 3.91           | 22.72             | 4.55            | 14.86           | 20.11            | 20.98          | 29.06           |
| 20               | 174.26                | 0.99             | 4.63          | 0.21            | 1.03             | 2.51           | 15.73             | 2.41            | 16.40           | 19.69            | 12.81          | 23.49           |
| 23               | 135.45                | 1.16             | 2.20          | 0.17            | 2.10             | 1.91           | 10.99             | 1.34            | 16.40           | 18.72            | 7.42           | 20.14           |
| 26               | 146.77                | 1.10             | 1.26          | 0.20            | 3.42             | 1.19           | 9.02              | 1.01            | 21.80           | 22.82            | 7.25           | 23.95           |
| 29               | 116.63                | 1.58             | 2.68          | 0.59            | 5.53             | 1.39           | 11.08             | 1.08            | 21.77           | 23.85            | 8.45           | 25.31           |
| 32               | 56.28                 | 0.27             | 2.26          | 0.46            | 6.07             | 0.66           | 7.35              | 0.77            | 24.13           | 25.42            | 5.81           | 26.07           |
| 35               | 18.32                 | 0.33             | 0.78          | 0.44            | 6.43             | 0.75           | 3.51              | 0.51            | 27.46           | 28.33            | 2.60           | 28.45           |
| 38               | -2.91                 | 0.40             | 0.32          | 0.43            | 5.72             | 0.74           | 1.98              | 0.42            | 30.12           | 30.71            | 1.53           | 30.74           |
| 41               | -3.49                 | 0.38             | 0.15          | 0.48            | 4.86             | 0.75           | 1.66              | 0.44            | 33.44           | 33.83            | 1.28           | 33.85           |

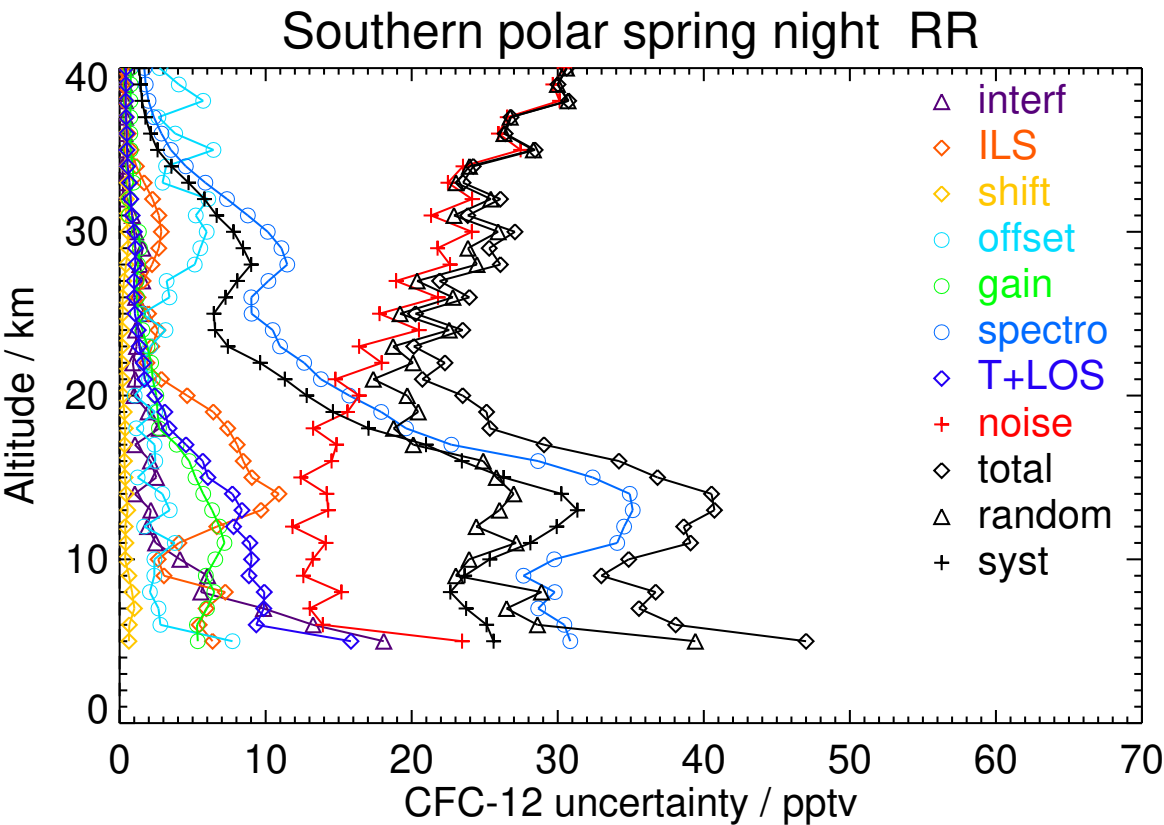

Figure S64. V8R\_F-12\_261 Southern polar spring night

**Table S66.** CFC-12 error budget for Southern polar summer day. All uncertainties are  $1\sigma$ .

| altitude<br>(km) | mean target<br>(pptv) | interf<br>(pptv) | ILS<br>(pptv) | shift<br>(pptv) | offset<br>(pptv) | gain<br>(pptv) | spectro<br>(pptv) | T+LOS<br>(pptv) | noise<br>(pptv) | random<br>(pptv) | syst<br>(pptv) | total<br>(pptv) |
|------------------|-----------------------|------------------|---------------|-----------------|------------------|----------------|-------------------|-----------------|-----------------|------------------|----------------|-----------------|
| 5                | 534.11                | 12.79            | 6.78          | 0.52            | 7.46             | 5.99           | 31.00             | 16.35           | 23.92           | 33.64            | 31.14          | 45.85           |
| 8                | 546.53                | 15.32            | 4.24          | 0.64            | 2.34             | 5.31           | 27.80             | 9.20            | 13.95           | 24.09            | 27.54          | 36.59           |
| 11               | 478.23                | 3.73             | 4.37          | 0.48            | 3.38             | 6.14           | 25.10             | 7.10            | 12.35           | 16.79            | 25.18          | 30.26           |
| 14               | 458.56                | 1.04             | 3.83          | 0.61            | 2.91             | 5.76           | 24.66             | 6.12            | 12.35           | 15.56            | 24.77          | 29.26           |
| 17               | 383.65                | 1.07             | 7.24          | 0.59            | 2.26             | 5.49           | 27.98             | 5.16            | 13.45           | 15.29            | 29.09          | 32.86           |
| 20               | 276.81                | 0.78             | 2.49          | 0.44            | 0.98             | 4.08           | 21.41             | 3.30            | 15.10           | 16.35            | 21.33          | 26.87           |
| 23               | 195.44                | 1.17             | 1.77          | 0.21            | 1.88             | 2.59           | 14.52             | 1.73            | 14.35           | 15.03            | 14.44          | 20.84           |
| 26               | 115.77                | 0.77             | 2.46          | 0.34            | 3.84             | 1.41           | 10.41             | 1.33            | 21.29           | 21.83            | 10.51          | 24.23           |
| 29               | 69.99                 | 1.88             | 1.71          | 0.45            | 5.22             | 0.47           | 6.39              | 0.79            | 20.45           | 21.27            | 6.42           | 22.22           |
| 32               | 27.23                 | 0.26             | 1.20          | 0.26            | 6.42             | 0.40           | 3.56              | 0.35            | 23.41           | 24.36            | 3.22           | 24.57           |
| 35               | 7.45                  | 0.43             | 0.44          | 0.36            | 6.83             | 0.50           | 1.75              | 0.44            | 26.63           | 27.55            | 1.09           | 27.57           |
| 38               | -3.47                 | 0.23             | 0.14          | 0.34            | 6.15             | 0.59           | 1.55              | 0.36            | 28.98           | 29.65            | 1.30           | 29.68           |
| 41               | -15.12                | 0.39             | 0.16          | 0.41            | 5.26             | 0.75           | 1.41              | 0.38            | 31.52           | 31.98            | 1.43           | 32.01           |

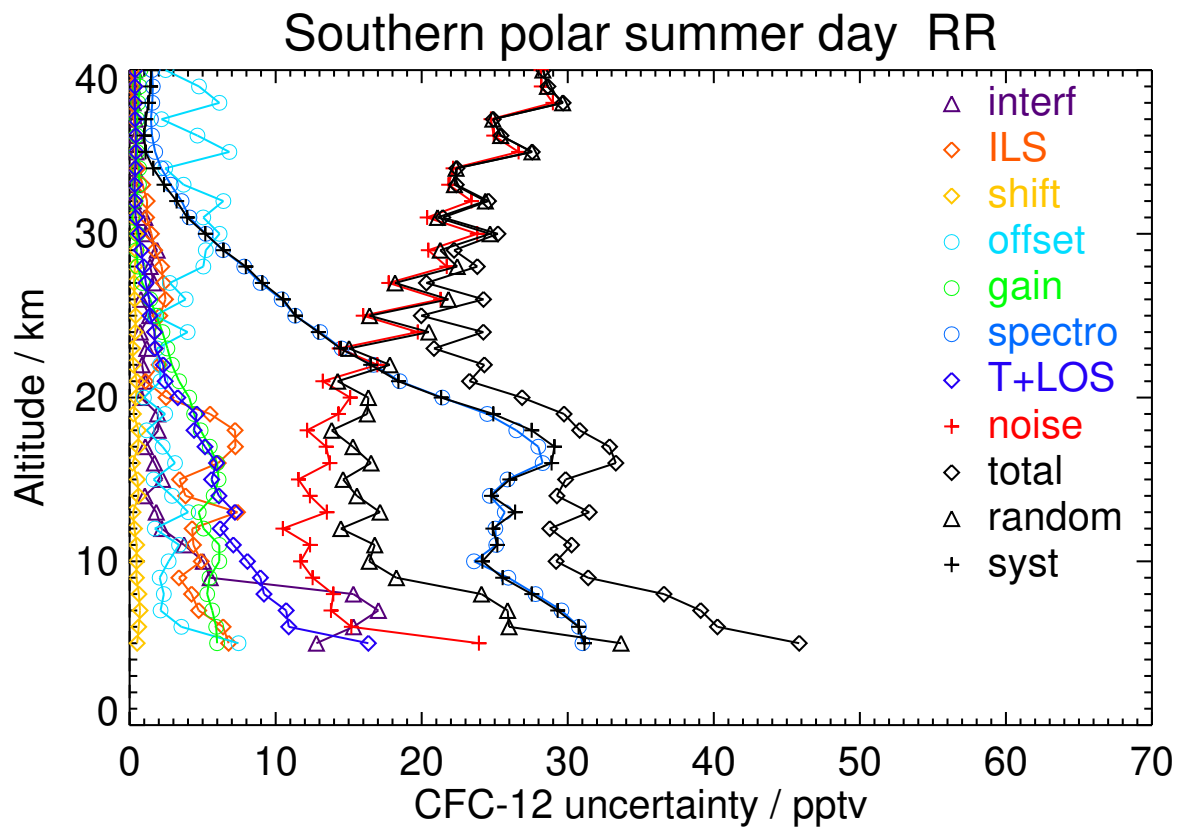

**Figure S65.** V8R\_F-12\_261 Southern polar summer day

**Table S67.** CFC-12 error budget for Southern polar summer night. All uncertainties are  $1\sigma$ .

| altitude<br>(km) | mean target<br>(pptv) | interf<br>(pptv) | ILS<br>(pptv) | shift<br>(pptv) | offset<br>(pptv) | gain<br>(pptv) | spectro<br>(pptv) | T+LOS<br>(pptv) | noise<br>(pptv) | random<br>(pptv) | syst<br>(pptv) | total<br>(pptv) |
|------------------|-----------------------|------------------|---------------|-----------------|------------------|----------------|-------------------|-----------------|-----------------|------------------|----------------|-----------------|
| 5                | 526.02                | 8.49             | 6.27          | 0.65            | 7.65             | 5.28           | 26.49             | 14.83           | 23.25           | 30.38            | 27.16          | 40.75           |
| 8                | 542.83                | 16.39            | 4.33          | 0.54            | 2.29             | 5.00           | 27.40             | 8.13            | 12.81           | 23.53            | 27.30          | 36.04           |
| 11               | 482.53                | 2.60             | 5.50          | 0.40            | 2.28             | 5.96           | 24.10             | 6.45            | 11.01           | 15.49            | 24.11          | 28.66           |
| 14               | 461.43                | 1.81             | 4.47          | 0.54            | 1.46             | 5.45           | 26.03             | 5.70            | 11.15           | 14.95            | 25.81          | 29.83           |
| 17               | 394.14                | 1.49             | 6.30          | 0.34            | 1.21             | 5.65           | 28.50             | 4.74            | 12.22           | 14.54            | 29.12          | 32.55           |
| 20               | 292.15                | 0.91             | 3.12          | 0.32            | 1.20             | 4.51           | 21.69             | 3.25            | 14.06           | 15.37            | 21.80          | 26.67           |
| 23               | 202.50                | 1.29             | 2.59          | 0.13            | 1.18             | 2.96           | 16.74             | 2.04            | 14.42           | 15.23            | 16.70          | 22.60           |
| 26               | 104.25                | 0.68             | 3.54          | 0.15            | 3.14             | 1.66           | 11.41             | 1.40            | 20.86           | 21.41            | 11.59          | 24.35           |
| 29               | 54.89                 | 1.95             | 1.37          | 0.45            | 5.31             | 0.40           | 5.05              | 0.72            | 21.07           | 21.93            | 4.84           | 22.46           |
| 32               | 30.76                 | 0.40             | 0.80          | 0.18            | 6.42             | 0.30           | 3.49              | 0.35            | 23.59           | 24.53            | 3.07           | 24.72           |
| 35               | -5.67                 | 0.46             | 0.23          | 0.39            | 6.12             | 0.50           | 1.42              | 0.39            | 26.59           | 27.31            | 1.13           | 27.33           |
| 38               | -1.51                 | 0.40             | 0.16          | 0.39            | 5.42             | 0.63           | 1.43              | 0.36            | 28.95           | 29.48            | 1.13           | 29.50           |
| 41               | -13.84                | 0.26             | 0.07          | 0.41            | 4.60             | 0.74           | 1.54              | 0.37            | 31.83           | 32.18            | 1.50           | 32.21           |

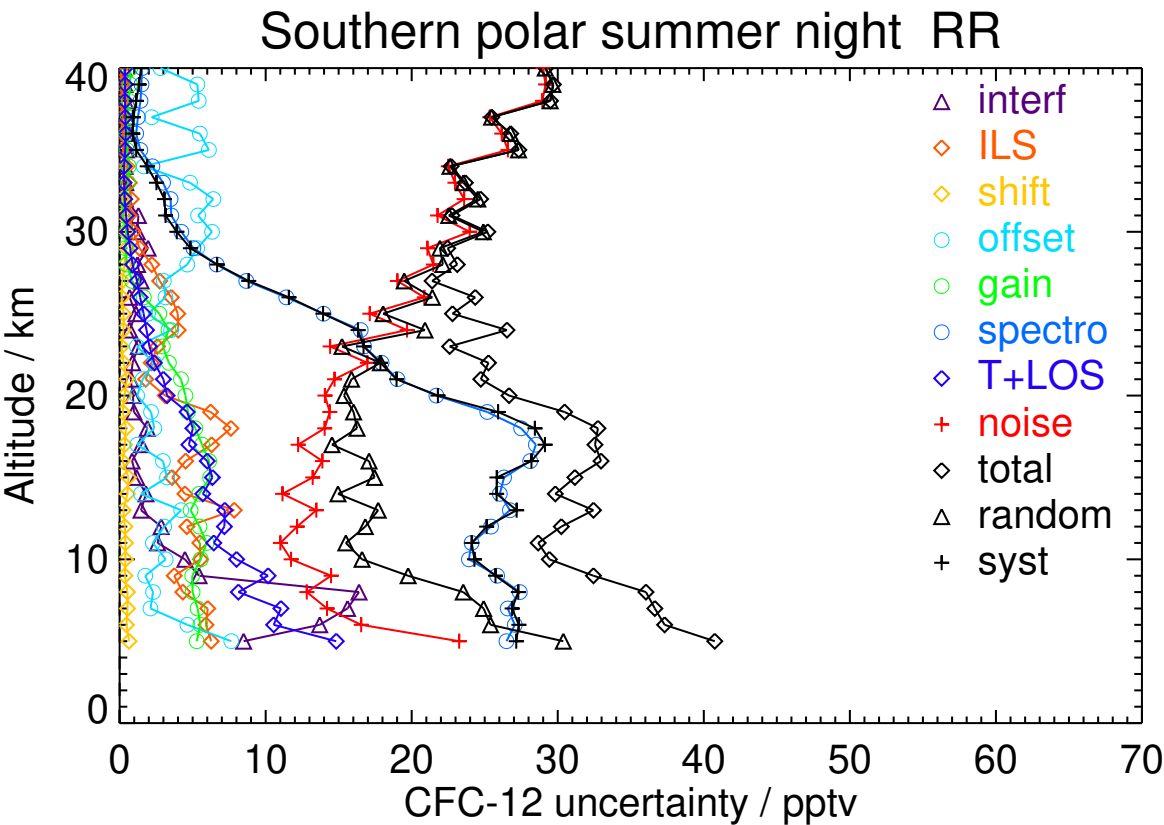

**Figure S66.** V8R\_F-12\_261 Southern polar summer night

**Table S68.** CFC-12 error budget for Southern polar autumn day. All uncertainties are  $1\sigma$ .

| altitude<br>(km) | mean target<br>(pptv) | interf<br>(pptv) | ILS<br>(pptv) | shift<br>(pptv) | offset<br>(pptv) | gain<br>(pptv) | spectro<br>(pptv) | T+LOS<br>(pptv) | noise<br>(pptv) | random<br>(pptv) | syst<br>(pptv) | total<br>(pptv) |
|------------------|-----------------------|------------------|---------------|-----------------|------------------|----------------|-------------------|-----------------|-----------------|------------------|----------------|-----------------|
| 5                | 534.01                | 18.29            | 4.33          | 0.69            | 8.02             | 5.26           | 34.20             | 17.07           | 25.10           | 37.45            | 33.68          | 50.37           |
| 8                | 530.73                | 7.96             | 3.37          | 0.98            | 2.46             | 5.90           | 28.34             | 9.35            | 14.01           | 20.05            | 28.30          | 34.69           |
| 11               | 499.26                | 1.85             | 3.59          | 0.51            | 3.66             | 5.75           | 24.98             | 7.34            | 13.02           | 16.49            | 25.27          | 30.17           |
| 14               | 477.57                | 0.97             | 3.54          | 0.62            | 2.91             | 7.04           | 28.75             | 6.79            | 13.57           | 16.07            | 29.50          | 33.59           |
| 17               | 377.19                | 0.69             | 6.14          | 0.32            | 2.03             | 6.06           | 28.23             | 5.07            | 14.79           | 16.35            | 29.21          | 33.47           |
| 20               | 266.79                | 0.66             | 3.08          | 0.32            | 1.44             | 4.77           | 24.22             | 3.34            | 16.95           | 18.00            | 24.41          | 30.33           |
| 23               | 141.35                | 0.94             | 2.94          | 0.08            | 1.83             | 2.50           | 16.78             | 2.05            | 18.10           | 18.72            | 16.80          | 25.15           |
| 26               | 63.81                 | 0.65             | 1.90          | 0.13            | 3.71             | 0.96           | 8.34              | 1.04            | 24.05           | 24.56            | 8.05           | 25.84           |
| 29               | 22.50                 | 0.75             | 1.35          | 0.23            | 7.07             | 0.38           | 4.19              | 0.63            | 26.32           | 27.36            | 3.88           | 27.63           |
| 32               | -0.61                 | 0.55             | 0.79          | 0.17            | 6.76             | 0.17           | 2.30              | 0.49            | 30.89           | 31.70            | 1.25           | 31.72           |
| 35               | -0.54                 | 0.42             | 0.36          | 0.35            | 5.39             | 0.18           | 1.33              | 0.46            | 34.47           | 34.92            | 0.68           | 34.92           |
| 38               | -5.30                 | 0.80             | 0.37          | 0.41            | 5.48             | 0.21           | 1.45              | 0.54            | 38.69           | 39.11            | 0.76           | 39.12           |
| 41               | -6.33                 | 1.65             | 0.61          | 0.41            | 7.84             | 0.26           | 1.32              | 0.62            | 42.25           | 43.03            | 0.74           | 43.03           |

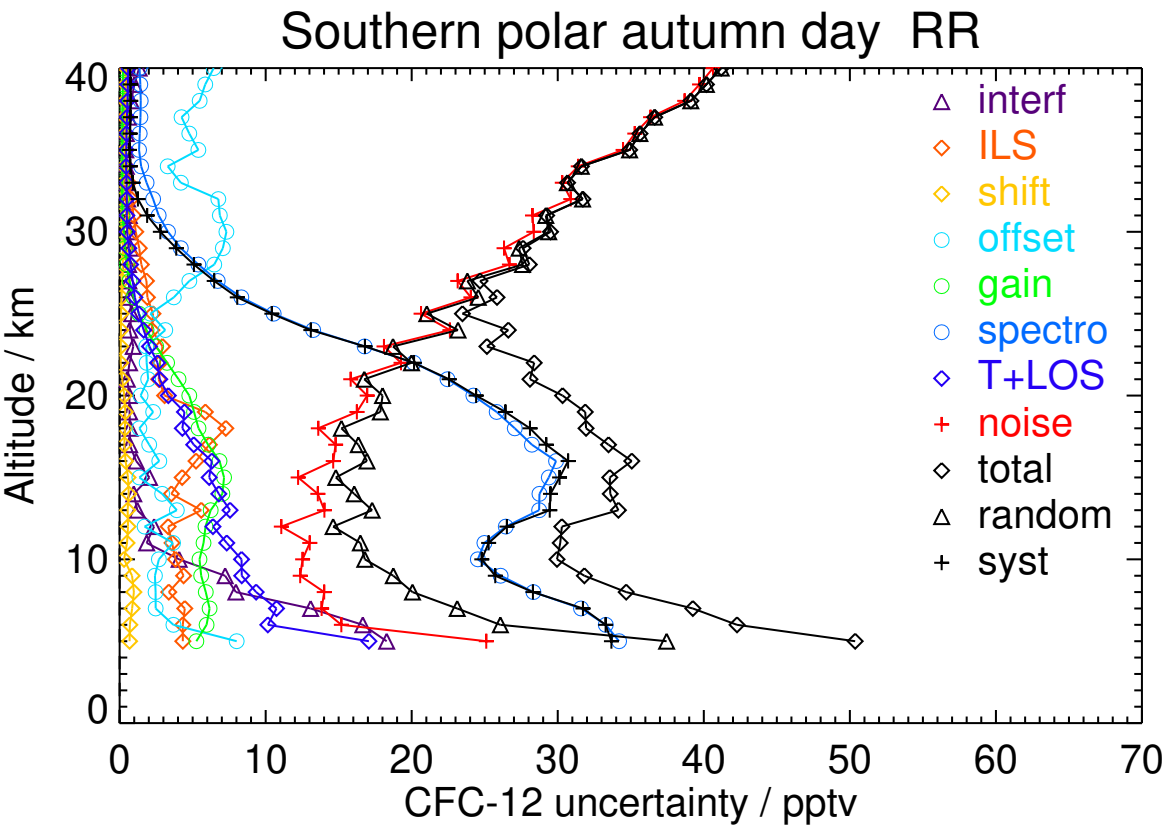

**Figure S67.** V8R\_F-12\_261 Southern polar autumn day

Table S69. CFC-12 error budget for Southern polar autumn night. All uncertainties are 1 $\sigma$ .

| altitude<br>(km) | mean target<br>(pptv) | interf<br>(pptv) | ILS<br>(pptv) | shift<br>(pptv) | offset<br>(pptv) | gain<br>(pptv) | spectro<br>(pptv) | T+LOS<br>(pptv) | noise<br>(pptv) | random<br>(pptv) | syst<br>(pptv) | total<br>(pptv) |
|------------------|-----------------------|------------------|---------------|-----------------|------------------|----------------|-------------------|-----------------|-----------------|------------------|----------------|-----------------|
| 5                | 527.01                | 15.76            | 5.80          | 0.73            | 7.10             | 5.57           | 30.85             | 14.85           | 22.27           | 34.02            | 29.58          | 45.08           |
| 8                | 525.28                | 9.81             | 5.50          | 0.59            | 2.59             | 5.83           | 24.97             | 10.19           | 15.19           | 23.03            | 24.39          | 33.55           |
| 11               | 499.87                | 2.62             | 4.22          | 0.26            | 3.99             | 5.88           | 23.24             | 7.57            | 13.41           | 16.99            | 23.74          | 29.20           |
| 14               | 473.31                | 0.99             | 3.92          | 0.66            | 2.91             | 6.74           | 29.30             | 7.19            | 13.85           | 16.82            | 29.83          | 34.24           |
| 17               | 348.18                | 0.63             | 7.01          | 0.37            | 1.96             | 6.34           | 28.51             | 5.32            | 15.01           | 16.89            | 29.58          | 34.06           |
| 20               | 231.88                | 0.54             | 3.55          | 0.27            | 1.28             | 3.59           | 21.41             | 3.17            | 17.11           | 17.84            | 21.69          | 28.09           |
| 23               | 117.06                | 0.86             | 2.70          | 0.09            | 1.80             | 1.95           | 14.85             | 1.85            | 18.61           | 19.17            | 14.76          | 24.19           |
| 26               | 48.80                 | 0.44             | 1.70          | 0.13            | 3.88             | 0.73           | 7.18              | 0.89            | 24.56           | 25.13            | 6.52           | 25.96           |
| 29               | 18.60                 | 0.53             | 1.01          | 0.19            | 7.48             | 0.28           | 3.74              | 0.59            | 27.18           | 28.29            | 3.16           | 28.47           |
| 32               | -4.81                 | 0.40             | 0.65          | 0.14            | 7.13             | 0.13           | 2.43              | 0.50            | 31.67           | 32.54            | 1.32           | 32.57           |
| 35               | 1.21                  | 0.45             | 0.35          | 0.31            | 5.09             | 0.14           | 1.54              | 0.49            | 35.15           | 35.56            | 0.56           | 35.56           |
| 38               | 2.03                  | 0.86             | 0.34          | 0.38            | 5.57             | 0.18           | 1.44              | 0.52            | 39.29           | 39.72            | 0.60           | 39.73           |
| 41               | -2.46                 | 1.52             | 0.50          | 0.38            | 7.89             | 0.28           | 1.28              | 0.63            | 42.46           | 43.24            | 0.66           | 43.24           |

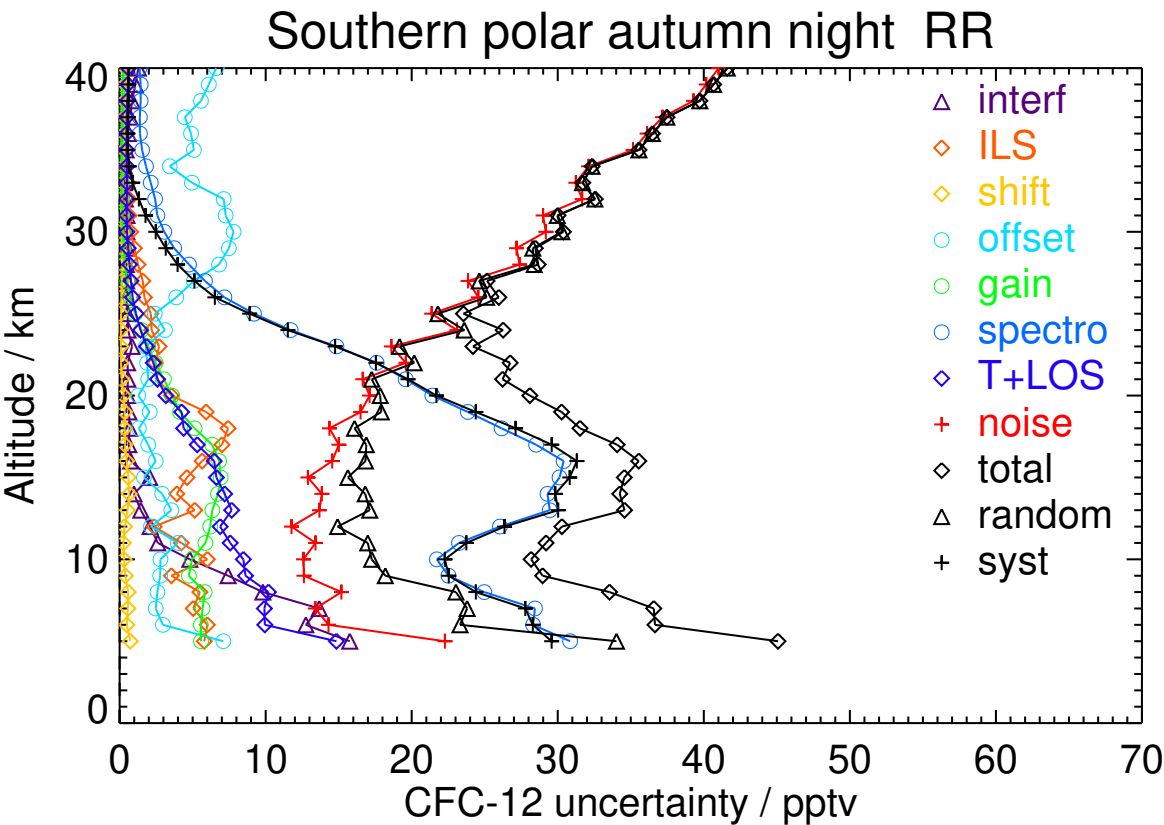

Figure S68. V8R\_F-12\_261 Southern polar autumn night
