# Supplementary material for: Version 8 IMK/IAA MIPAS measurements of CFC-11, CFC-12, and HCFC-22
Source: Copernicus journal article supplement (doi:10.5194/amt-2023-172), 2023-08-11
Supplement: Supplementary file 5 [file amt-2023-172-supplement.zip]

*Supplement 1 to*  
**Version 8 IMK/IAA MIPAS measurements of CFC-11, CFC-12, and  
HCFC-22**

**Gabriele P. Stiller et al.**

*Correspondence to:* Gabriele P. Stiller (gabriele.stiller@kit.edu)

This document serves as reference for the definitions of the representative atmospheres used for the calculation of CFC-11 error budgets, as listed in Tab. S1, and as collection of the respective error budgets for FR data (2002-2004), which are listed in tables S2–S35 and depicted in figures S1–S34, and the respective error budgets for RR data (2005-2012), which are listed in tables S36–S69 and depicted in figures S35–S68.

**Table S1.** Labels and definitions of the representative atmospheric conditions which were used to calculate the error budget for FR and RR data.

| representative atmosphere label   | month(s) used | latitude range | solar zenith angle range |
|-----------------------------------|---------------|----------------|--------------------------|
| Northern polar winter day         | Jan, Feb      | 65°N – 90°N    | < 90°                    |
| Northern polar winter night       | Jan, Feb      | 65°N – 90°N    | > 95°                    |
| Northern polar spring day         | Apr           | 65°N – 90°N    | < 90°                    |
| Northern polar spring night       | Apr           | 65°N – 90°N    | > 95°                    |
| Northern polar summer day         | Jul, Aug      | 65°N – 90°N    | < 90°                    |
| Northern polar summer night       | Jul, Aug      | 65°N – 90°N    | > 95°                    |
| Northern polar autumn day         | Oct           | 65°N – 90°N    | < 90°                    |
| Northern polar autumn night       | Oct           | 65°N – 90°N    | > 95°                    |
| Northern midlatitude winter day   | Jan, Feb      | 40°N – 60°N    | < 90°                    |
| Northern midlatitude winter night | Jan, Feb      | 40°N – 60°N    | > 95°                    |
| Northern midlatitude spring day   | Apr           | 40°N – 60°N    | < 90°                    |
| Northern midlatitude spring night | Apr           | 40°N – 60°N    | > 95°                    |
| Northern midlatitude summer day   | Jul, Aug      | 40°N – 60°N    | < 90°                    |
| Northern midlatitude summer night | Jul, Aug      | 40°N – 60°N    | > 95°                    |
| Northern midlatitude autumn day   | Oct           | 40°N – 60°N    | < 90°                    |
| Northern midlatitude autumn night | Oct           | 40°N – 60°N    | > 95°                    |
| Tropics day                       | Apr           | 20°S – 20°N    | < 90°                    |
| Tropics night                     | Apr           | 20°S – 20°N    | > 95°                    |
| Southern midlatitude winter day   | Jul, Aug      | 40°S – 60°S    | < 90°                    |
| Southern midlatitude winter night | Jul, Aug      | 40°S – 60°S    | > 95°                    |
| Southern midlatitude spring day   | Oct           | 40°S – 60°S    | < 90°                    |
| Southern midlatitude spring night | Oct           | 40°S – 60°S    | > 95°                    |
| Southern midlatitude summer day   | Jan, Feb      | 40°S – 60°S    | < 90°                    |
| Southern midlatitude summer night | Jan, Feb      | 40°S – 60°S    | > 95°                    |
| Southern midlatitude autumn day   | Apr           | 40°S – 60°S    | < 90°                    |
| Southern midlatitude autumn night | Apr           | 40°S – 60°S    | > 95°                    |
| Southern polar winter day         | Jul, Aug      | 65°S – 90°S    | < 90°                    |
| Southern polar winter night       | Jul, Aug      | 65°S – 90°S    | > 95°                    |
| Southern polar spring day         | Oct           | 65°S – 90°S    | < 90°                    |
| Southern polar spring night       | Oct           | 65°S – 90°S    | > 95°                    |
| Southern polar summer day         | Jan, Feb      | 65°S – 90°S    | < 90°                    |
| Southern polar summer night       | Jan, Feb      | 65°S – 90°S    | > 95°                    |
| Southern polar autumn day         | Apr           | 65°S – 90°S    | < 90°                    |
| Southern polar autumn night       | Apr           | 65°S – 90°S    | > 95°                    |

**Table S2.** CFC-11 error budget for Northern polar winter day. All uncertainties are  $1\sigma$ .

| altitude<br>(km) | mean target<br>(pptv) | interf<br>(pptv) | ILS<br>(pptv) | shift<br>(pptv) | offset<br>(pptv) | gain<br>(pptv) | spectro<br>(pptv) | T+LOS<br>(pptv) | noise<br>(pptv) | random<br>(pptv) | syst<br>(pptv) | total<br>(pptv) |
|------------------|-----------------------|------------------|---------------|-----------------|------------------|----------------|-------------------|-----------------|-----------------|------------------|----------------|-----------------|
| 5                | 300.41                | 23.50            | 2.22          | 0.35            | 4.62             | 1.73           | 17.15             | 7.90            | 8.88            | 27.59            | 15.99          | 31.89           |
| 8                | 257.25                | 12.51            | 1.48          | 0.24            | 2.89             | 5.10           | 12.37             | 4.65            | 5.40            | 15.72            | 12.25          | 19.93           |
| 11               | 224.32                | 7.49             | 1.38          | 0.17            | 2.05             | 3.52           | 12.06             | 3.54            | 3.73            | 9.83             | 12.25          | 15.71           |
| 14               | 170.40                | 4.63             | 4.44          | 0.42            | 1.69             | 3.04           | 14.50             | 3.82            | 3.23            | 8.75             | 14.56          | 16.99           |
| 17               | 92.28                 | 4.25             | 4.46          | 0.62            | 1.70             | 2.06           | 11.24             | 2.79            | 3.80            | 7.52             | 11.73          | 13.93           |
| 20               | 33.64                 | 3.06             | 1.74          | 0.21            | 1.87             | 1.06           | 6.12              | 1.47            | 4.98            | 7.51             | 5.01           | 9.03            |
| 23               | 14.95                 | 2.82             | 0.38          | 0.11            | 2.13             | 0.38           | 2.08              | 0.72            | 6.47            | 7.54             | 1.60           | 7.71            |
| 26               | 9.19                  | 2.64             | 0.19          | 0.04            | 2.34             | 0.13           | 1.04              | 0.44            | 8.08            | 8.88             | 0.51           | 8.89            |
| 29               | 13.02                 | 2.28             | 0.16          | 0.04            | 2.48             | 0.14           | 1.11              | 0.32            | 9.89            | 10.49            | 0.64           | 10.51           |
| 32               | 10.50                 | 1.77             | 0.19          | 0.05            | 2.69             | 0.13           | 1.02              | 0.31            | 11.78           | 12.24            | 0.66           | 12.26           |
| 35               | 6.75                  | 1.52             | 0.14          | 0.05            | 3.26             | 0.11           | 0.93              | 0.22            | 13.87           | 14.35            | 0.69           | 14.37           |
| 38               | 8.60                  | 1.40             | 0.21          | 0.04            | 4.95             | 0.11           | 1.65              | 0.20            | 15.63           | 16.47            | 1.47           | 16.54           |
| 41               | 9.86                  | 1.45             | 0.26          | 0.04            | 8.49             | 0.13           | 1.95              | 0.21            | 17.56           | 19.57            | 1.82           | 19.66           |

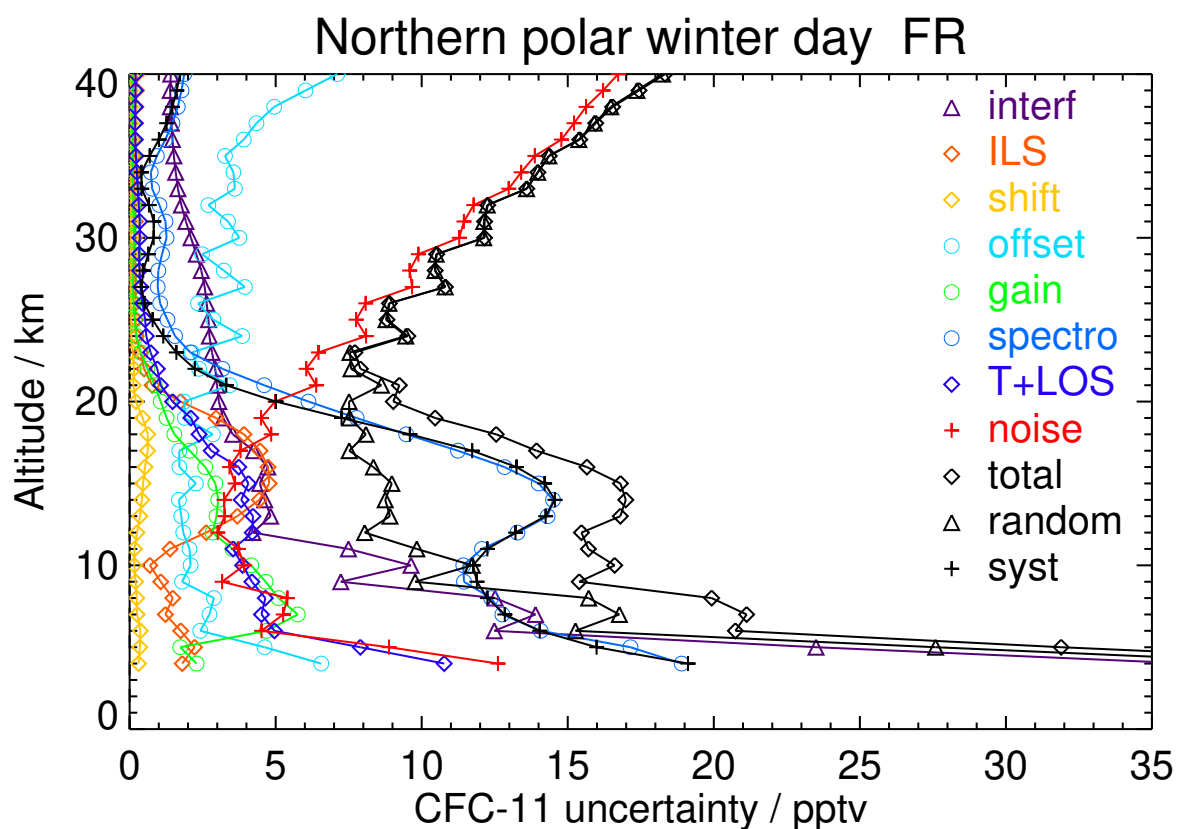**Figure S1.** V8H\_F-11\_61 Northern polar winter day

**Table S3.** CFC-11 error budget for Northern polar winter night. All uncertainties are  $1\sigma$ .

| altitude<br>(km) | mean target<br>(pptv) | interf<br>(pptv) | ILS<br>(pptv) | shift<br>(pptv) | offset<br>(pptv) | gain<br>(pptv) | spectro<br>(pptv) | T+LOS<br>(pptv) | noise<br>(pptv) | random<br>(pptv) | syst<br>(pptv) | total<br>(pptv) |
|------------------|-----------------------|------------------|---------------|-----------------|------------------|----------------|-------------------|-----------------|-----------------|------------------|----------------|-----------------|
| 5                | 298.97                | 24.92            | 3.60          | 0.24            | 5.13             | 3.25           | 16.50             | 8.20            | 9.69            | 29.06            | 16.12          | 33.23           |
| 8                | 235.39                | 12.61            | 2.55          | 0.36            | 3.11             | 6.59           | 10.05             | 3.07            | 5.67            | 15.25            | 11.34          | 19.01           |
| 11               | 236.10                | 4.28             | 1.82          | 0.15            | 2.20             | 2.76           | 12.93             | 4.03            | 3.93            | 8.03             | 12.98          | 15.26           |
| 14               | 160.40                | 5.59             | 4.49          | 0.45            | 1.59             | 3.46           | 14.78             | 4.00            | 3.32            | 8.64             | 15.39          | 17.65           |
| 17               | 82.84                 | 3.95             | 4.29          | 0.42            | 1.35             | 1.42           | 11.02             | 3.14            | 3.70            | 7.31             | 11.38          | 13.52           |
| 20               | 25.49                 | 3.19             | 1.99          | 0.24            | 1.30             | 0.90           | 5.75              | 1.71            | 4.84            | 7.18             | 4.95           | 8.72            |
| 23               | 13.25                 | 2.90             | 0.55          | 0.15            | 1.53             | 0.31           | 1.88              | 0.76            | 6.33            | 7.37             | 1.00           | 7.44            |
| 26               | 9.70                  | 2.76             | 0.21          | 0.05            | 1.91             | 0.13           | 1.32              | 0.47            | 7.99            | 8.75             | 0.81           | 8.78            |
| 29               | 11.86                 | 2.40             | 0.18          | 0.05            | 2.22             | 0.13           | 0.98              | 0.35            | 9.53            | 10.12            | 0.48           | 10.13           |
| 32               | 11.06                 | 1.95             | 0.28          | 0.06            | 2.70             | 0.11           | 1.02              | 0.29            | 11.30           | 11.82            | 0.45           | 11.83           |
| 35               | 9.25                  | 1.64             | 0.18          | 0.05            | 3.42             | 0.10           | 0.87              | 0.24            | 13.34           | 13.89            | 0.50           | 13.90           |
| 38               | 2.34                  | 1.53             | 0.15          | 0.04            | 4.51             | 0.11           | 1.25              | 0.21            | 15.16           | 15.91            | 1.04           | 15.94           |
| 41               | -2.94                 | 1.58             | 0.20          | 0.04            | 7.46             | 0.13           | 1.73              | 0.22            | 16.63           | 18.32            | 1.56           | 18.38           |

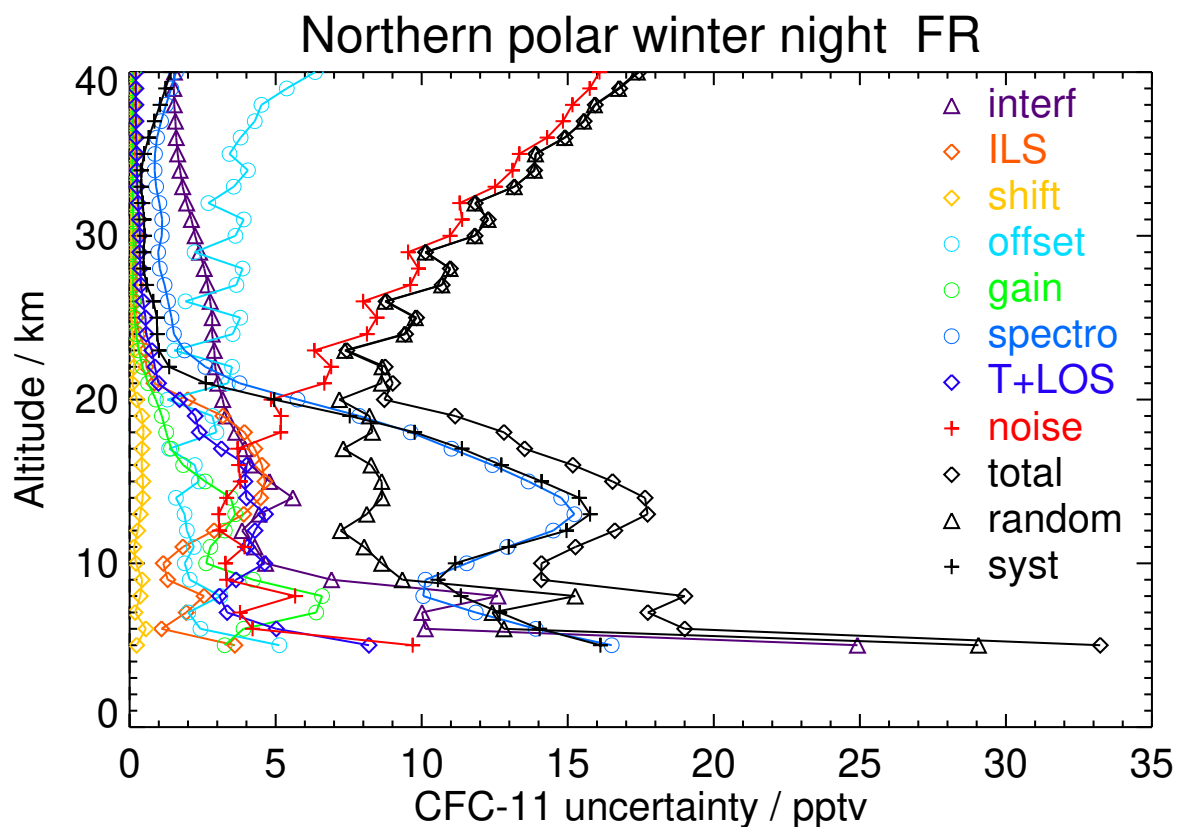**Figure S2.** V8H\_F-11\_61 Northern polar winter night

**Table S4.** CFC-11 error budget for Northern polar spring day. All uncertainties are  $1\sigma$ .

| altitude<br>(km) | mean target<br>(pptv) | interf<br>(pptv) | ILS<br>(pptv) | shift<br>(pptv) | offset<br>(pptv) | gain<br>(pptv) | spectro<br>(pptv) | T+LOS<br>(pptv) | noise<br>(pptv) | random<br>(pptv) | syst<br>(pptv) | total<br>(pptv) |
|------------------|-----------------------|------------------|---------------|-----------------|------------------|----------------|-------------------|-----------------|-----------------|------------------|----------------|-----------------|
| 8                | 245.61                | 10.14            | 0.83          | 0.23            | 1.87             | 5.07           | 14.36             | 4.61            | 3.18            | 12.33            | 14.78          | 19.24           |
| 11               | 209.93                | 5.76             | 0.65          | 0.09            | 1.76             | 2.81           | 10.64             | 3.73            | 2.77            | 8.23             | 10.56          | 13.39           |
| 14               | 135.43                | 4.38             | 4.92          | 0.33            | 2.05             | 3.06           | 15.45             | 4.03            | 2.82            | 7.70             | 16.14          | 17.89           |
| 17               | 53.07                 | 4.00             | 3.24          | 0.42            | 2.54             | 1.12           | 7.27              | 2.07            | 3.61            | 7.40             | 7.05           | 10.22           |
| 20               | 28.12                 | 3.05             | 1.25          | 0.22            | 3.24             | 0.65           | 3.38              | 0.96            | 4.87            | 7.10             | 2.73           | 7.61            |
| 23               | 14.45                 | 2.75             | 0.28          | 0.11            | 3.99             | 0.34           | 1.84              | 0.57            | 6.39            | 8.18             | 1.14           | 8.25            |
| 26               | 9.28                  | 2.60             | 0.16          | 0.03            | 4.51             | 0.14           | 1.01              | 0.40            | 8.07            | 9.64             | 0.65           | 9.66            |
| 29               | 5.41                  | 2.33             | 0.22          | 0.04            | 4.62             | 0.12           | 0.88              | 0.32            | 9.59            | 10.91            | 0.69           | 10.94           |
| 32               | 2.37                  | 1.78             | 0.16          | 0.07            | 4.37             | 0.09           | 0.70              | 0.23            | 10.93           | 11.93            | 0.21           | 11.93           |
| 35               | 4.06                  | 1.48             | 0.12          | 0.07            | 3.79             | 0.11           | 0.95              | 0.17            | 12.60           | 13.25            | 0.77           | 13.28           |
| 38               | 6.31                  | 1.30             | 0.14          | 0.06            | 4.04             | 0.18           | 1.27              | 0.17            | 14.20           | 14.84            | 1.11           | 14.88           |
| 41               | 4.76                  | 1.47             | 0.18          | 0.05            | 5.32             | 0.19           | 1.58              | 0.19            | 15.51           | 16.48            | 1.42           | 16.54           |

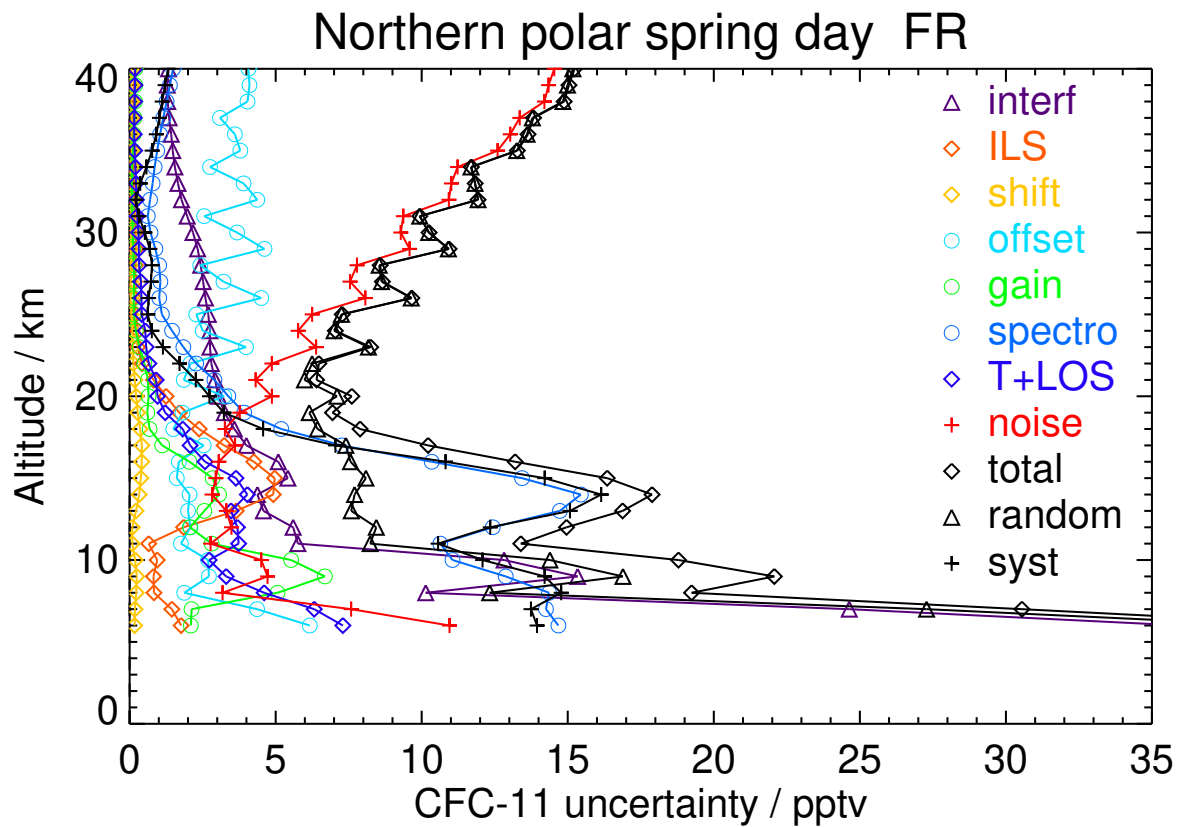

**Figure S3.** V8H\_F-11\_61 Northern polar spring day

**Table S5.** CFC-11 error budget for Northern polar spring night. All uncertainties are  $1\sigma$ .

| altitude<br>(km) | mean target<br>(pptv) | interf<br>(pptv) | ILS<br>(pptv) | shift<br>(pptv) | offset<br>(pptv) | gain<br>(pptv) | spectro<br>(pptv) | T+LOS<br>(pptv) | noise<br>(pptv) | random<br>(pptv) | syst<br>(pptv) | total<br>(pptv) |
|------------------|-----------------------|------------------|---------------|-----------------|------------------|----------------|-------------------|-----------------|-----------------|------------------|----------------|-----------------|
| 8                | 252.76                | 9.81             | 1.44          | 0.31            | 2.03             | 4.56           | 14.97             | 5.06            | 3.40            | 12.24            | 15.33          | 19.61           |
| 11               | 202.35                | 6.48             | 1.08          | 0.11            | 1.76             | 2.88           | 11.13             | 3.50            | 2.76            | 8.79             | 11.00          | 14.08           |
| 14               | 142.51                | 4.28             | 4.55          | 0.35            | 2.06             | 2.71           | 14.33             | 3.74            | 2.86            | 7.81             | 14.74          | 16.68           |
| 17               | 69.53                 | 4.14             | 3.75          | 0.48            | 2.57             | 1.31           | 9.03              | 2.20            | 3.73            | 7.95             | 8.76           | 11.83           |
| 20               | 31.64                 | 3.09             | 1.57          | 0.20            | 3.24             | 0.83           | 4.69              | 1.06            | 5.02            | 7.67             | 3.56           | 8.46            |
| 23               | 14.52                 | 2.73             | 0.34          | 0.10            | 3.93             | 0.35           | 1.92              | 0.56            | 6.56            | 8.30             | 1.18           | 8.38            |
| 26               | 10.07                 | 2.60             | 0.17          | 0.04            | 4.46             | 0.21           | 1.23              | 0.40            | 8.27            | 9.80             | 0.78           | 9.84            |
| 29               | 5.18                  | 2.30             | 0.19          | 0.05            | 4.46             | 0.14           | 0.97              | 0.32            | 9.80            | 11.04            | 0.73           | 11.06           |
| 32               | 0.95                  | 1.77             | 0.17          | 0.07            | 4.00             | 0.07           | 0.63              | 0.24            | 11.20           | 12.04            | 0.26           | 12.04           |
| 35               | 1.22                  | 1.40             | 0.13          | 0.09            | 3.56             | 0.12           | 0.92              | 0.18            | 12.83           | 13.40            | 0.74           | 13.42           |
| 38               | 8.79                  | 1.33             | 0.18          | 0.08            | 3.88             | 0.18           | 1.34              | 0.18            | 14.46           | 15.05            | 1.19           | 15.09           |
| 41               | 5.34                  | 1.68             | 0.21          | 0.06            | 5.48             | 0.18           | 1.65              | 0.18            | 15.77           | 16.79            | 1.51           | 16.86           |

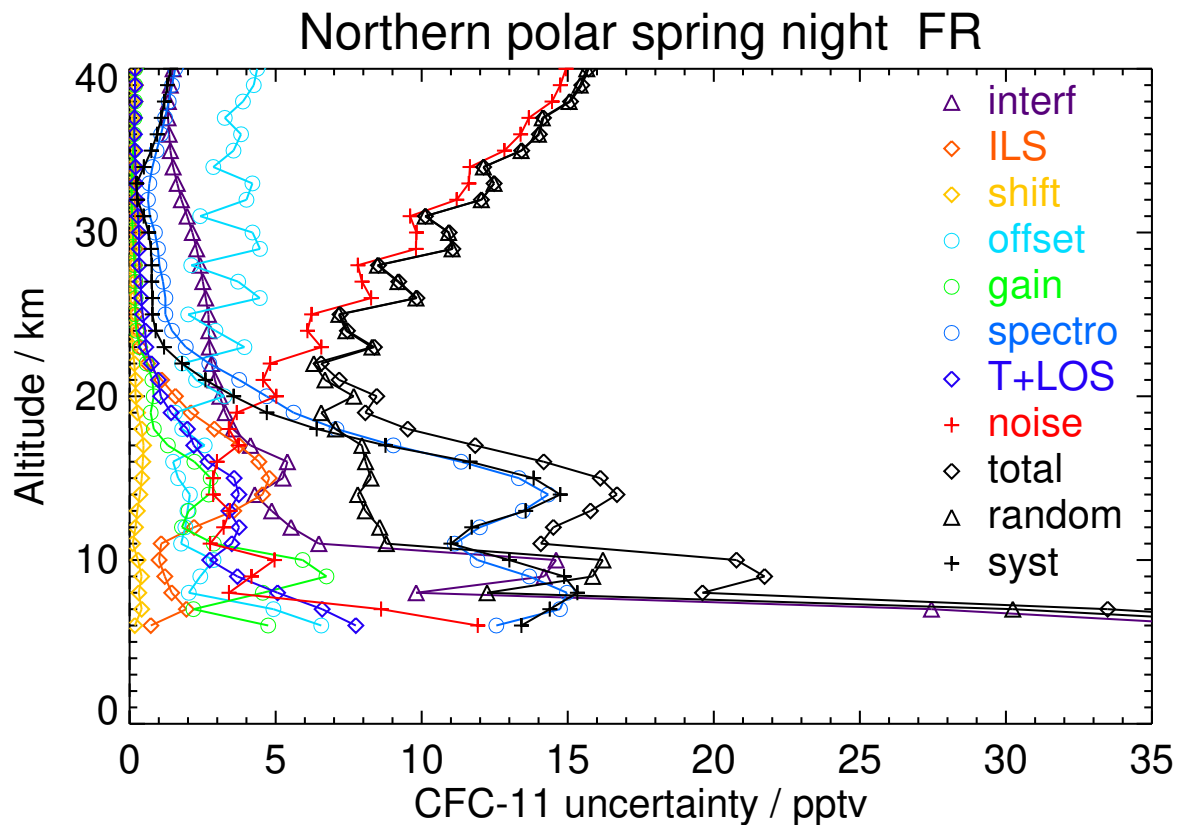

**Figure S4.** V8H\_F-11\_61 Northern polar spring night

**Table S6.** CFC-11 error budget for Northern polar summer day. All uncertainties are  $1\sigma$ .

| altitude<br>(km) | mean target<br>(pptv) | interf<br>(pptv) | ILS<br>(pptv) | shift<br>(pptv) | offset<br>(pptv) | gain<br>(pptv) | spectro<br>(pptv) | T+LOS<br>(pptv) | noise<br>(pptv) | random<br>(pptv) | syst<br>(pptv) | total<br>(pptv) |
|------------------|-----------------------|------------------|---------------|-----------------|------------------|----------------|-------------------|-----------------|-----------------|------------------|----------------|-----------------|
| 8                | 249.17                | 19.54            | 1.25          | 0.32            | 3.71             | 2.47           | 9.42              | 3.58            | 7.39            | 22.20            | 8.18           | 23.66           |
| 11               | 229.31                | 11.80            | 1.45          | 0.17            | 2.30             | 5.43           | 11.36             | 2.73            | 4.51            | 13.65            | 12.11          | 18.24           |
| 14               | 218.52                | 4.61             | 1.94          | 0.14            | 1.60             | 2.49           | 11.03             | 3.03            | 3.18            | 6.92             | 11.26          | 13.22           |
| 17               | 163.62                | 4.35             | 5.48          | 0.74            | 1.27             | 3.34           | 14.46             | 3.18            | 3.03            | 6.64             | 15.70          | 17.05           |
| 20               | 72.48                 | 3.02             | 3.11          | 0.34            | 1.28             | 1.46           | 9.88              | 2.16            | 3.79            | 5.75             | 10.31          | 11.80           |
| 23               | 23.63                 | 2.73             | 0.44          | 0.38            | 1.51             | 0.71           | 2.93              | 1.07            | 4.95            | 6.03             | 2.91           | 6.70            |
| 26               | 7.80                  | 2.59             | 0.22          | 0.06            | 1.88             | 0.16           | 1.15              | 0.57            | 6.46            | 7.28             | 0.88           | 7.33            |
| 29               | 3.34                  | 2.27             | 0.15          | 0.04            | 2.21             | 0.09           | 0.77              | 0.38            | 8.10            | 8.73             | 0.46           | 8.74            |
| 32               | 2.81                  | 1.65             | 0.16          | 0.06            | 2.40             | 0.08           | 0.70              | 0.28            | 9.75            | 10.20            | 0.29           | 10.20           |
| 35               | 7.13                  | 1.45             | 0.11          | 0.12            | 2.65             | 0.14           | 0.66              | 0.22            | 11.52           | 11.93            | 0.35           | 11.93           |
| 38               | 4.11                  | 1.27             | 0.14          | 0.13            | 2.91             | 0.18           | 1.07              | 0.22            | 13.54           | 13.92            | 0.90           | 13.95           |
| 41               | 0.55                  | 1.31             | 0.17          | 0.10            | 3.73             | 0.20           | 1.61              | 0.19            | 14.55           | 15.09            | 1.56           | 15.17           |

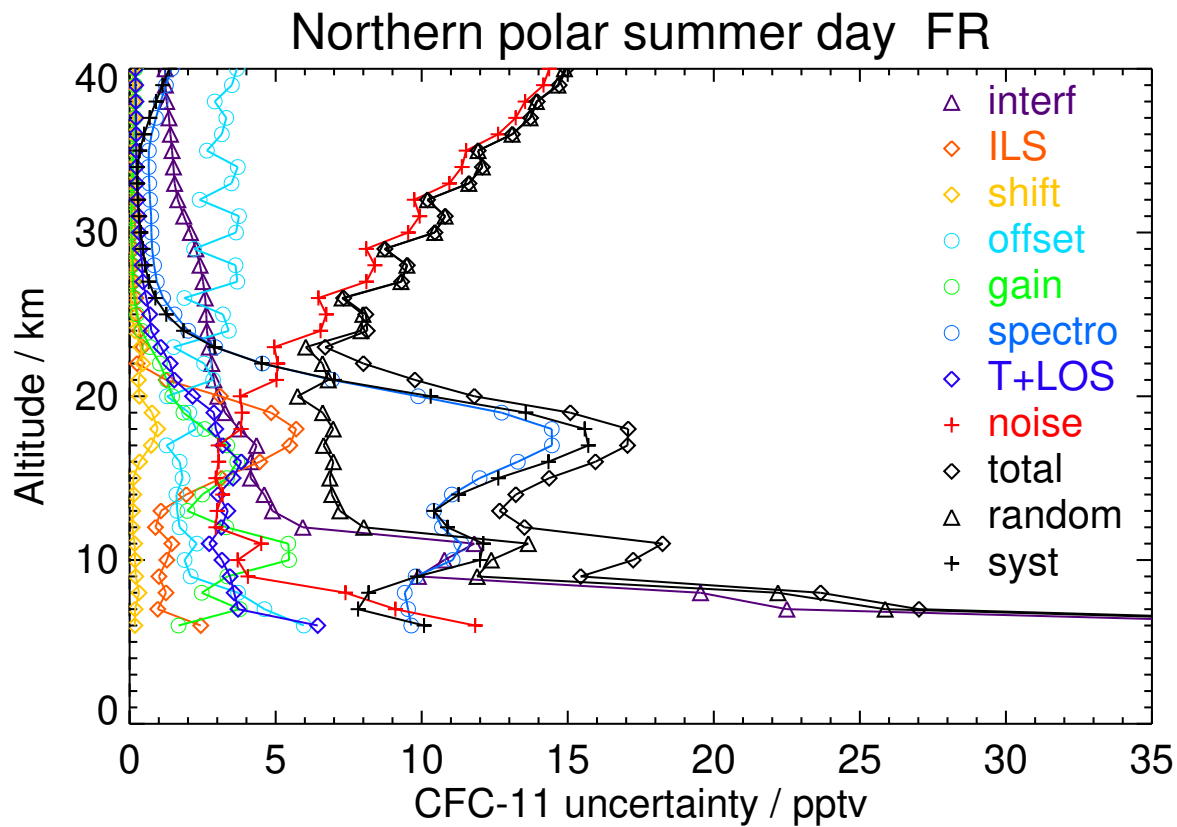

**Figure S5.** V8H\_F-11\_61 Northern polar summer day

**Table S7.** CFC-11 error budget for Northern polar summer night. All uncertainties are  $1\sigma$ .

| altitude<br>(km) | mean target<br>(pptv) | interf<br>(pptv) | ILS<br>(pptv) | shift<br>(pptv) | offset<br>(pptv) | gain<br>(pptv) | spectro<br>(pptv) | T+LOS<br>(pptv) | noise<br>(pptv) | random<br>(pptv) | syst<br>(pptv) | total<br>(pptv) |
|------------------|-----------------------|------------------|---------------|-----------------|------------------|----------------|-------------------|-----------------|-----------------|------------------|----------------|-----------------|
| 8                | 262.23                | 21.82            | 0.84          | 0.17            | 4.62             | 2.88           | 8.94              | 4.22            | 9.27            | 24.75            | 8.78           | 26.26           |
| 11               | 228.75                | 12.16            | 0.64          | 0.11            | 2.36             | 6.03           | 11.54             | 2.75            | 4.82            | 13.82            | 12.77          | 18.82           |
| 14               | 226.54                | 4.55             | 1.50          | 0.08            | 1.63             | 2.20           | 10.66             | 3.10            | 3.37            | 6.87             | 10.86          | 12.85           |
| 17               | 168.73                | 4.22             | 5.73          | 0.50            | 1.13             | 3.57           | 15.16             | 3.44            | 3.02            | 6.49             | 16.55          | 17.78           |
| 20               | 77.50                 | 2.93             | 3.73          | 0.33            | 0.97             | 1.50           | 10.60             | 2.44            | 3.72            | 5.60             | 11.25          | 12.56           |
| 23               | 21.33                 | 2.77             | 0.39          | 0.38            | 1.09             | 0.74           | 3.38              | 1.23            | 4.87            | 5.94             | 3.32           | 6.81            |
| 26               | 7.29                  | 2.55             | 0.24          | 0.06            | 1.46             | 0.15           | 1.06              | 0.62            | 6.45            | 7.16             | 0.82           | 7.20            |
| 29               | 5.71                  | 2.33             | 0.12          | 0.04            | 1.87             | 0.07           | 0.79              | 0.39            | 8.21            | 8.77             | 0.56           | 8.78            |
| 32               | 2.03                  | 1.60             | 0.20          | 0.07            | 2.27             | 0.08           | 0.66              | 0.31            | 9.95            | 10.35            | 0.35           | 10.36           |
| 35               | 1.23                  | 1.28             | 0.08          | 0.10            | 2.66             | 0.09           | 0.79              | 0.20            | 11.78           | 12.15            | 0.68           | 12.17           |
| 38               | 3.45                  | 1.37             | 0.19          | 0.10            | 3.01             | 0.10           | 1.37              | 0.18            | 13.79           | 14.19            | 1.30           | 14.25           |
| 41               | -0.01                 | 1.27             | 0.23          | 0.08            | 3.96             | 0.13           | 1.72              | 0.18            | 14.83           | 15.41            | 1.67           | 15.50           |

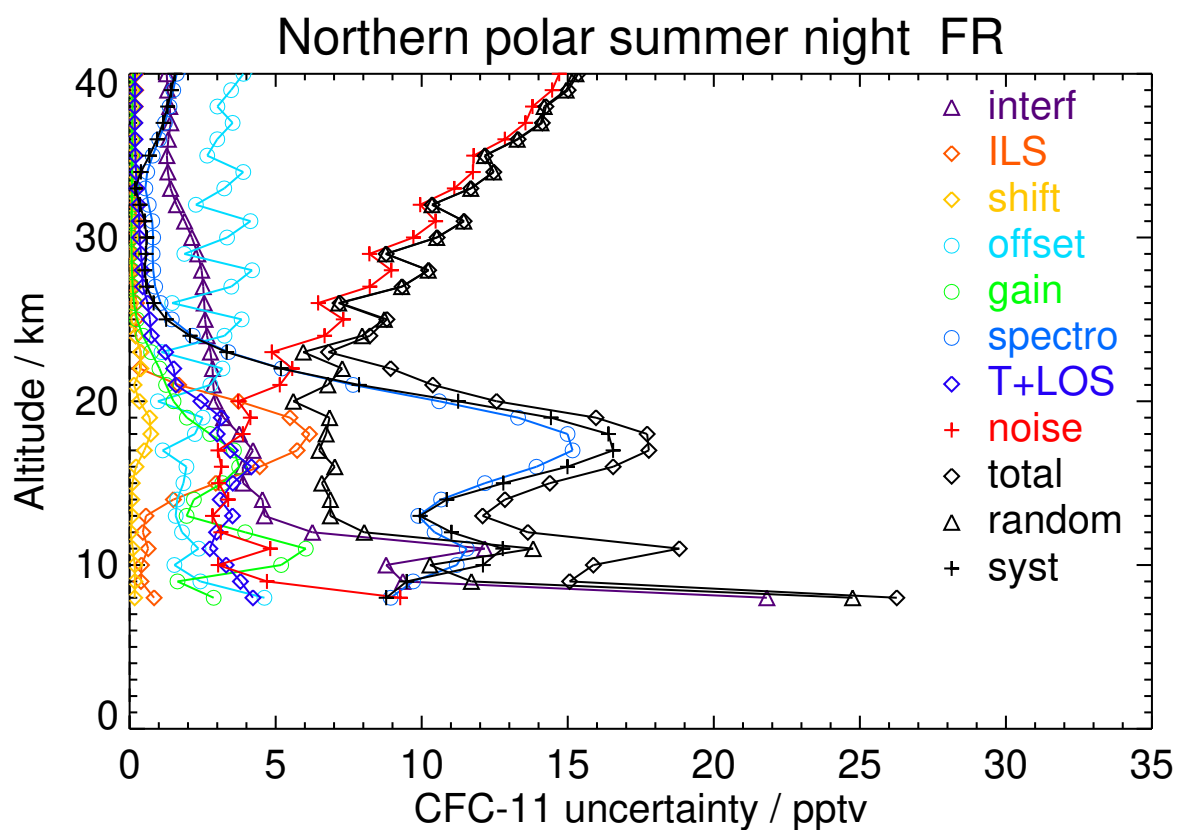**Figure S6.** V8H\_F-11\_61 Northern polar summer night



**Table S8.** CFC-11 error budget for Northern polar autumn day. All uncertainties are  $1\sigma$ .

| altitude<br>(km) | mean target<br>(pptv) | interf<br>(pptv) | ILS<br>(pptv) | shift<br>(pptv) | offset<br>(pptv) | gain<br>(pptv) | spectro<br>(pptv) | T+LOS<br>(pptv) | noise<br>(pptv) | random<br>(pptv) | syst<br>(pptv) | total<br>(pptv) |
|------------------|-----------------------|------------------|---------------|-----------------|------------------|----------------|-------------------|-----------------|-----------------|------------------|----------------|-----------------|
| 8                | 246.26                | 10.92            | 1.00          | 0.80            | 2.15             | 6.41           | 11.05             | 3.26            | 3.74            | 12.74            | 12.29          | 17.70           |
| 11               | 244.60                | 6.32             | 0.47          | 0.32            | 1.89             | 2.81           | 10.59             | 3.87            | 3.13            | 8.70             | 10.63          | 13.74           |
| 14               | 208.24                | 4.91             | 2.12          | 0.23            | 1.83             | 4.31           | 12.82             | 3.77            | 2.82            | 7.49             | 13.46          | 15.40           |
| 17               | 147.46                | 3.85             | 3.91          | 0.51            | 2.07             | 2.81           | 13.11             | 3.67            | 3.34            | 7.02             | 13.77          | 15.46           |
| 20               | 60.57                 | 3.02             | 3.68          | 0.36            | 2.55             | 1.66           | 10.16             | 2.41            | 4.53            | 7.30             | 10.40          | 12.71           |
| 23               | 17.67                 | 2.74             | 0.35          | 0.07            | 3.33             | 0.46           | 3.02              | 1.00            | 6.42            | 7.94             | 2.69           | 8.38            |
| 26               | 6.18                  | 2.54             | 0.19          | 0.05            | 3.97             | 0.18           | 1.48              | 0.53            | 8.60            | 9.88             | 1.07           | 9.94            |
| 29               | 6.95                  | 2.23             | 0.16          | 0.05            | 4.19             | 0.13           | 1.28              | 0.38            | 10.68           | 11.74            | 0.81           | 11.76           |
| 32               | 6.37                  | 1.66             | 0.13          | 0.05            | 3.76             | 0.12           | 0.92              | 0.32            | 12.62           | 13.30            | 0.57           | 13.31           |
| 35               | 1.67                  | 1.33             | 0.15          | 0.05            | 3.98             | 0.12           | 0.94              | 0.25            | 14.68           | 15.29            | 0.40           | 15.30           |
| 38               | -0.62                 | 1.28             | 0.16          | 0.05            | 5.62             | 0.14           | 1.44              | 0.22            | 16.50           | 17.49            | 1.29           | 17.54           |
| 41               | 2.52                  | 1.31             | 0.24          | 0.05            | 9.08             | 0.10           | 2.02              | 0.22            | 17.97           | 20.18            | 1.96           | 20.28           |

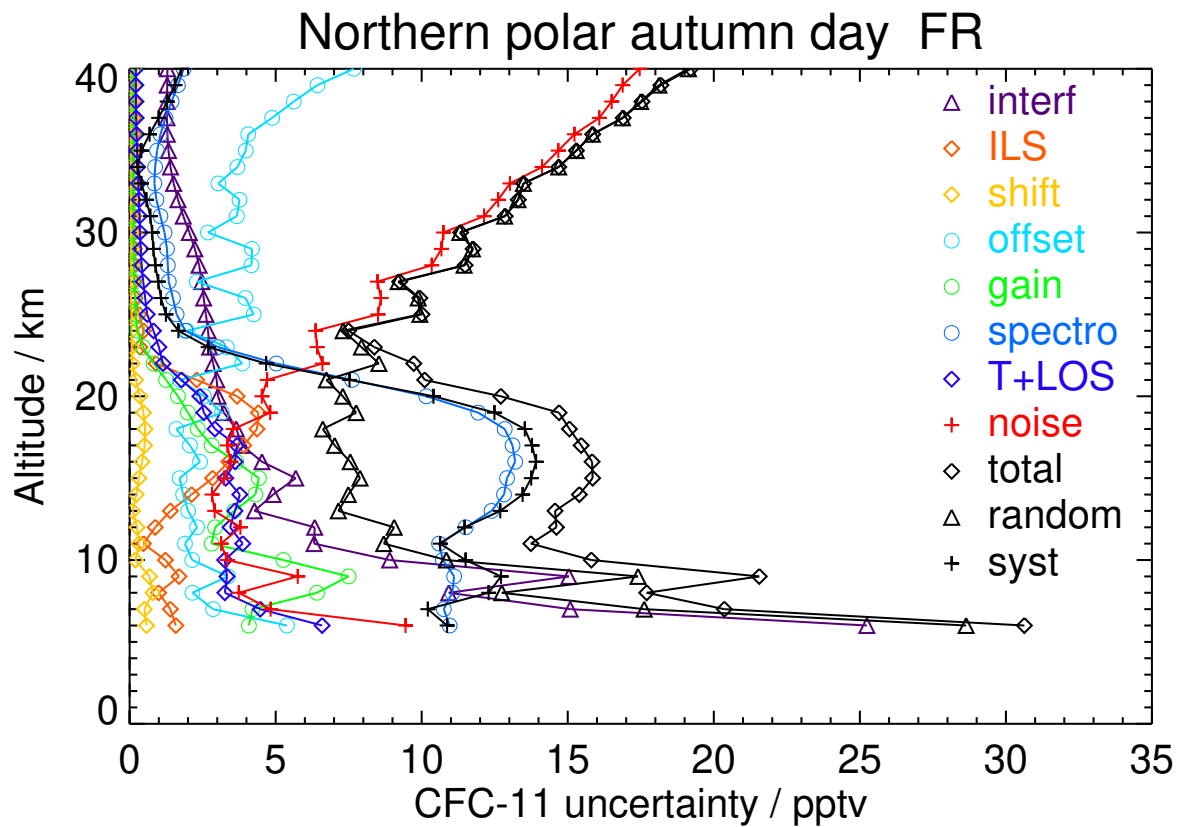

**Figure S7.** V8H\_F-11\_61 Northern polar autumn day

**Table S9.** CFC-11 error budget for Northern polar autumn night. All uncertainties are  $1\sigma$ .

| altitude<br>(km) | mean target<br>(pptv) | interf<br>(pptv) | ILS<br>(pptv) | shift<br>(pptv) | offset<br>(pptv) | gain<br>(pptv) | spectro<br>(pptv) | T+LOS<br>(pptv) | noise<br>(pptv) | random<br>(pptv) | syst<br>(pptv) | total<br>(pptv) |
|------------------|-----------------------|------------------|---------------|-----------------|------------------|----------------|-------------------|-----------------|-----------------|------------------|----------------|-----------------|
| 8                | 249.00                | 9.68             | 0.90          | 0.26            | 2.00             | 6.11           | 12.19             | 3.70            | 3.50            | 11.58            | 13.28          | 17.62           |
| 11               | 238.34                | 4.54             | 0.55          | 0.10            | 1.80             | 2.47           | 10.17             | 3.83            | 2.88            | 7.20             | 10.24          | 12.52           |
| 14               | 201.81                | 4.58             | 2.51          | 0.24            | 1.95             | 4.27           | 13.69             | 3.94            | 2.85            | 7.45             | 14.32          | 16.14           |
| 17               | 119.28                | 3.69             | 3.99          | 0.51            | 2.31             | 2.44           | 12.80             | 3.64            | 3.54            | 7.12             | 13.41          | 15.19           |
| 20               | 41.10                 | 3.12             | 2.97          | 0.22            | 2.98             | 1.30           | 7.70              | 2.02            | 5.00            | 7.32             | 7.99           | 10.84           |
| 23               | 9.20                  | 2.75             | 0.42          | 0.05            | 3.82             | 0.29           | 2.26              | 0.80            | 6.90            | 8.55             | 1.65           | 8.71            |
| 26               | 5.74                  | 2.57             | 0.25          | 0.05            | 4.44             | 0.11           | 1.09              | 0.47            | 9.07            | 10.47            | 0.76           | 10.50           |
| 29               | 10.45                 | 2.26             | 0.15          | 0.04            | 4.41             | 0.14           | 1.21              | 0.39            | 10.96           | 12.06            | 0.90           | 12.10           |
| 32               | 6.02                  | 1.67             | 0.17          | 0.04            | 3.92             | 0.12           | 0.86              | 0.33            | 12.70           | 13.42            | 0.54           | 13.43           |
| 35               | 2.97                  | 1.30             | 0.15          | 0.05            | 4.11             | 0.09           | 0.92              | 0.26            | 14.55           | 15.20            | 0.56           | 15.21           |
| 38               | 1.31                  | 1.19             | 0.20          | 0.05            | 5.48             | 0.08           | 1.54              | 0.25            | 16.32           | 17.27            | 1.43           | 17.33           |
| 41               | -4.33                 | 1.27             | 0.23          | 0.05            | 8.79             | 0.07           | 2.03              | 0.26            | 17.76           | 19.86            | 1.99           | 19.96           |

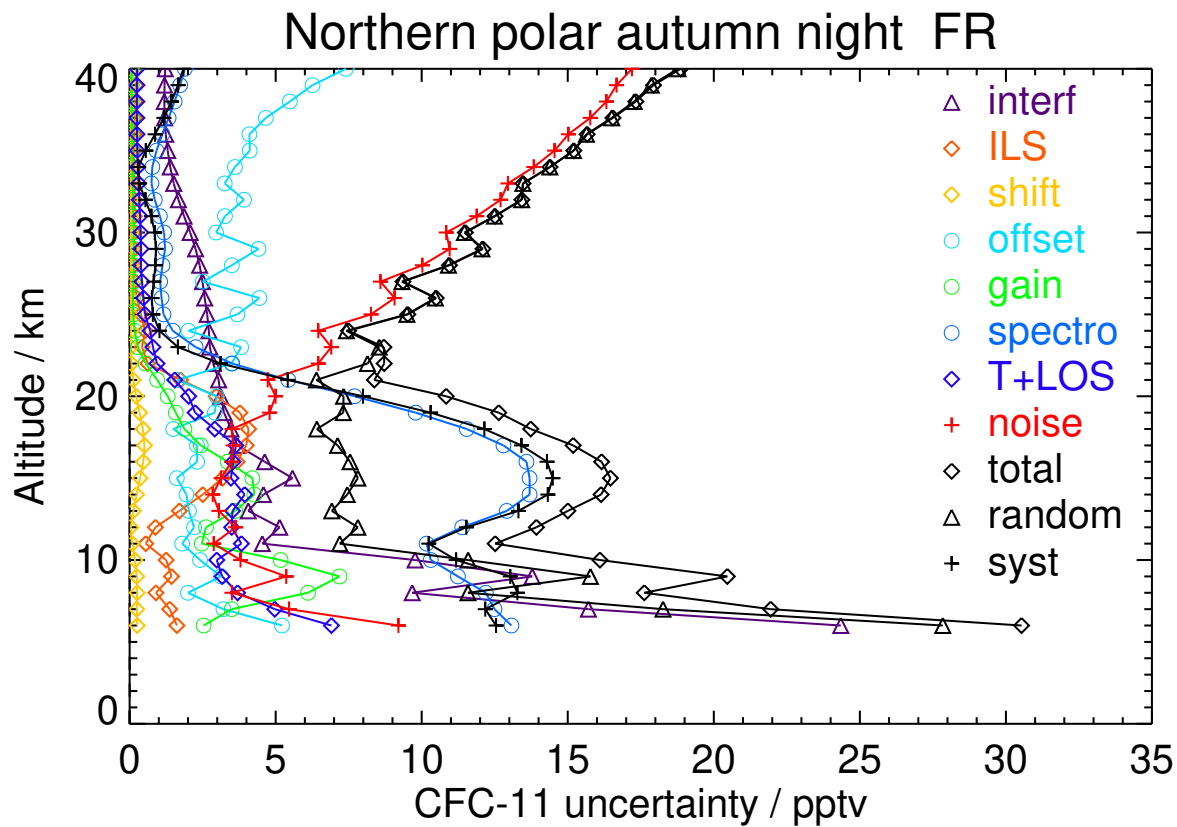

**Figure S8.** V8H\_F-11\_61 Northern polar autumn night

**Table S10.** CFC-11 error budget for Northern midlatitude winter day. All uncertainties are  $1\sigma$ .

| altitude<br>(km) | mean target<br>(pptv) | interf<br>(pptv) | ILS<br>(pptv) | shift<br>(pptv) | offset<br>(pptv) | gain<br>(pptv) | spectro<br>(pptv) | T+LOS<br>(pptv) | noise<br>(pptv) | random<br>(pptv) | syst<br>(pptv) | total<br>(pptv) |
|------------------|-----------------------|------------------|---------------|-----------------|------------------|----------------|-------------------|-----------------|-----------------|------------------|----------------|-----------------|
| 5                | 291.30                | 22.25            | 1.72          | 0.20            | 5.21             | 1.68           | 15.25             | 8.05            | 9.41            | 26.75            | 14.06          | 30.23           |
| 8                | 253.37                | 12.17            | 1.58          | 0.22            | 3.28             | 5.83           | 11.01             | 4.07            | 5.77            | 15.45            | 11.31          | 19.15           |
| 11               | 230.70                | 6.14             | 1.05          | 0.25            | 2.18             | 3.33           | 12.24             | 3.76            | 3.92            | 8.90             | 12.45          | 15.30           |
| 14               | 184.82                | 4.76             | 2.85          | 0.35            | 1.60             | 3.45           | 12.78             | 3.57            | 3.16            | 7.66             | 13.15          | 15.21           |
| 17               | 129.11                | 4.14             | 4.48          | 0.67            | 1.47             | 2.26           | 12.04             | 2.84            | 3.51            | 7.16             | 12.61          | 14.50           |
| 20               | 62.83                 | 2.98             | 2.54          | 0.22            | 1.67             | 1.31           | 8.46              | 1.83            | 4.58            | 6.97             | 8.19           | 10.76           |
| 23               | 25.64                 | 2.81             | 0.36          | 0.19            | 1.89             | 0.62           | 3.22              | 0.97            | 6.02            | 7.16             | 2.90           | 7.72            |
| 26               | 9.78                  | 2.57             | 0.26          | 0.04            | 2.01             | 0.22           | 1.62              | 0.58            | 7.68            | 8.44             | 1.18           | 8.52            |
| 29               | 10.28                 | 2.28             | 0.17          | 0.05            | 2.12             | 0.13           | 1.13              | 0.39            | 9.43            | 9.98             | 0.76           | 10.01           |
| 32               | 7.73                  | 1.75             | 0.20          | 0.05            | 2.38             | 0.09           | 0.96              | 0.32            | 11.31           | 11.72            | 0.54           | 11.73           |
| 35               | 7.04                  | 1.40             | 0.12          | 0.05            | 2.94             | 0.11           | 0.97              | 0.22            | 13.26           | 13.67            | 0.68           | 13.69           |
| 38               | 6.15                  | 1.32             | 0.21          | 0.05            | 4.10             | 0.13           | 1.63              | 0.20            | 15.03           | 15.65            | 1.49           | 15.72           |
| 41               | 5.43                  | 1.56             | 0.25          | 0.04            | 6.85             | 0.11           | 1.97              | 0.20            | 16.50           | 17.95            | 1.90           | 18.05           |

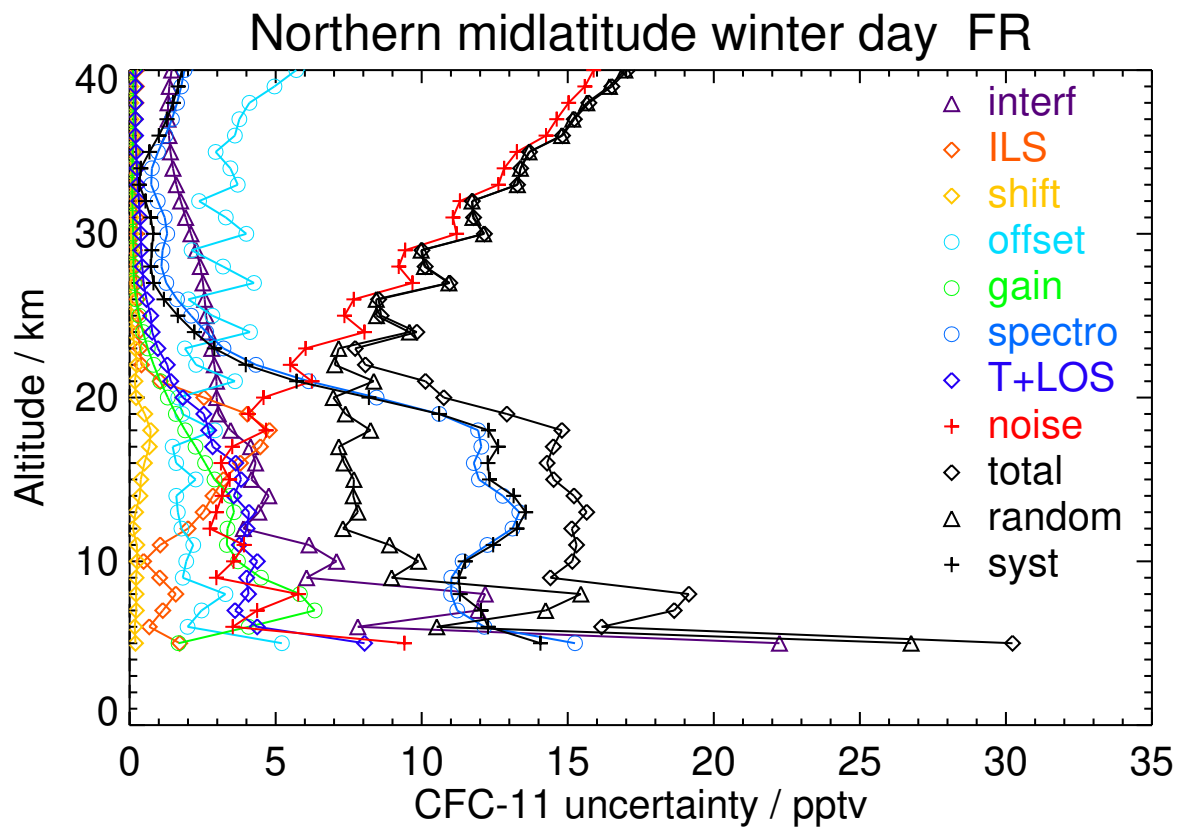

**Figure S9.** V8H\_F-11\_61 Northern midlatitude winter day

**Table S11.** CFC-11 error budget for Northern midlatitude winter night. All uncertainties are  $1\sigma$ .

| altitude<br>(km) | mean target<br>(pptv) | interf<br>(pptv) | ILS<br>(pptv) | shift<br>(pptv) | offset<br>(pptv) | gain<br>(pptv) | spectro<br>(pptv) | T+LOS<br>(pptv) | noise<br>(pptv) | random<br>(pptv) | syst<br>(pptv) | total<br>(pptv) |
|------------------|-----------------------|------------------|---------------|-----------------|------------------|----------------|-------------------|-----------------|-----------------|------------------|----------------|-----------------|
| 5                | 296.14                | 23.26            | 2.18          | 0.30            | 6.94             | 4.21           | 13.06             | 8.52            | 9.71            | 28.59            | 11.49          | 30.81           |
| 8                | 243.08                | 11.66            | 1.80          | 0.25            | 3.30             | 7.28           | 16.55             | 3.39            | 5.05            | 17.58            | 14.32          | 22.67           |
| 11               | 235.35                | 5.08             | 1.27          | 0.14            | 2.05             | 2.79           | 13.84             | 4.37            | 3.50            | 10.20            | 12.58          | 16.19           |
| 14               | 168.85                | 4.65             | 3.25          | 0.22            | 1.40             | 3.75           | 14.56             | 3.73            | 2.88            | 10.18            | 13.37          | 16.81           |
| 17               | 122.41                | 4.09             | 3.55          | 0.53            | 1.03             | 1.88           | 11.12             | 2.88            | 3.03            | 8.37             | 10.26          | 13.24           |
| 20               | 60.09                 | 2.84             | 3.07          | 0.48            | 0.95             | 1.38           | 7.70              | 1.96            | 3.84            | 6.08             | 7.84           | 9.92            |
| 23               | 26.08                 | 2.83             | 0.53          | 0.22            | 1.22             | 0.50           | 4.16              | 1.00            | 5.19            | 6.96             | 2.61           | 7.44            |
| 26               | 11.43                 | 2.55             | 0.20          | 0.07            | 1.68             | 0.24           | 1.31              | 0.58            | 6.95            | 7.67             | 1.01           | 7.73            |
| 29               | 12.99                 | 2.23             | 0.21          | 0.04            | 2.34             | 0.17           | 1.32              | 0.38            | 9.00            | 9.63             | 0.79           | 9.66            |
| 32               | 8.68                  | 1.62             | 0.22          | 0.05            | 2.84             | 0.14           | 1.16              | 0.36            | 11.21           | 11.71            | 0.86           | 11.74           |
| 35               | 6.19                  | 1.34             | 0.18          | 0.05            | 3.20             | 0.09           | 0.83              | 0.25            | 13.24           | 13.71            | 0.46           | 13.72           |
| 38               | 2.51                  | 1.25             | 0.18          | 0.05            | 3.92             | 0.11           | 1.64              | 0.20            | 15.03           | 15.61            | 1.41           | 15.67           |
| 41               | 1.11                  | 1.42             | 0.26          | 0.04            | 6.31             | 0.10           | 2.25              | 0.20            | 16.20           | 17.48            | 1.98           | 17.59           |

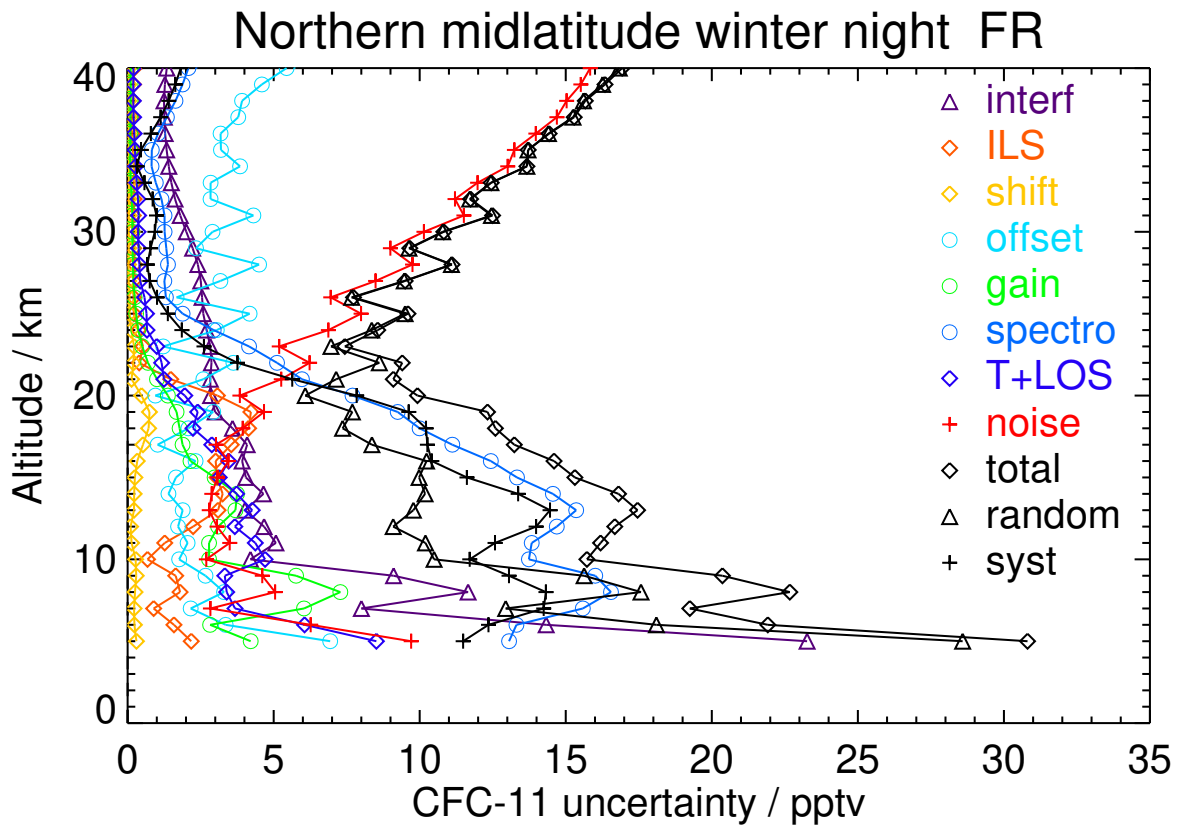**Figure S10.** V8H\_F-11\_61 Northern midlatitude winter night

**Table S12.** CFC-11 error budget for Northern midlatitude spring day. All uncertainties are  $1\sigma$ .

| altitude<br>(km) | mean target<br>(pptv) | interf<br>(pptv) | ILS<br>(pptv) | shift<br>(pptv) | offset<br>(pptv) | gain<br>(pptv) | spectro<br>(pptv) | T+LOS<br>(pptv) | noise<br>(pptv) | random<br>(pptv) | syst<br>(pptv) | total<br>(pptv) |
|------------------|-----------------------|------------------|---------------|-----------------|------------------|----------------|-------------------|-----------------|-----------------|------------------|----------------|-----------------|
| 8                | 252.49                | 8.92             | 0.64          | 0.21            | 1.93             | 4.48           | 11.64             | 3.91            | 3.23            | 11.16            | 11.85          | 16.28           |
| 11               | 221.77                | 5.79             | 0.71          | 0.07            | 1.89             | 3.52           | 10.21             | 3.55            | 2.86            | 8.16             | 10.41          | 13.23           |
| 14               | 193.44                | 4.46             | 2.86          | 0.18            | 2.19             | 3.16           | 12.40             | 3.87            | 2.94            | 7.84             | 12.60          | 14.84           |
| 17               | 145.54                | 4.07             | 4.92          | 0.74            | 2.81             | 2.19           | 13.73             | 3.27            | 3.86            | 7.96             | 14.31          | 16.37           |
| 20               | 63.68                 | 3.11             | 2.85          | 0.29            | 3.58             | 1.55           | 9.76              | 2.02            | 5.24            | 8.49             | 9.38           | 12.65           |
| 23               | 24.10                 | 2.77             | 0.36          | 0.18            | 4.31             | 0.58           | 3.26              | 0.92            | 6.89            | 8.90             | 2.54           | 9.25            |
| 26               | 13.75                 | 2.59             | 0.32          | 0.06            | 4.79             | 0.23           | 1.81              | 0.58            | 8.62            | 10.29            | 1.33           | 10.38           |
| 29               | 6.09                  | 2.31             | 0.26          | 0.07            | 4.65             | 0.15           | 1.11              | 0.41            | 9.99            | 11.29            | 0.85           | 11.33           |
| 32               | 2.54                  | 1.88             | 0.25          | 0.09            | 4.28             | 0.07           | 0.65              | 0.26            | 11.42           | 12.36            | 0.26           | 12.36           |
| 35               | 2.70                  | 1.53             | 0.15          | 0.10            | 3.87             | 0.10           | 1.11              | 0.21            | 12.88           | 13.55            | 0.90           | 13.58           |
| 38               | 4.01                  | 1.50             | 0.16          | 0.09            | 4.20             | 0.13           | 1.51              | 0.19            | 14.29           | 14.98            | 1.44           | 15.05           |
| 41               | 1.74                  | 1.92             | 0.22          | 0.06            | 5.69             | 0.13           | 1.86              | 0.20            | 15.56           | 16.70            | 1.77           | 16.79           |

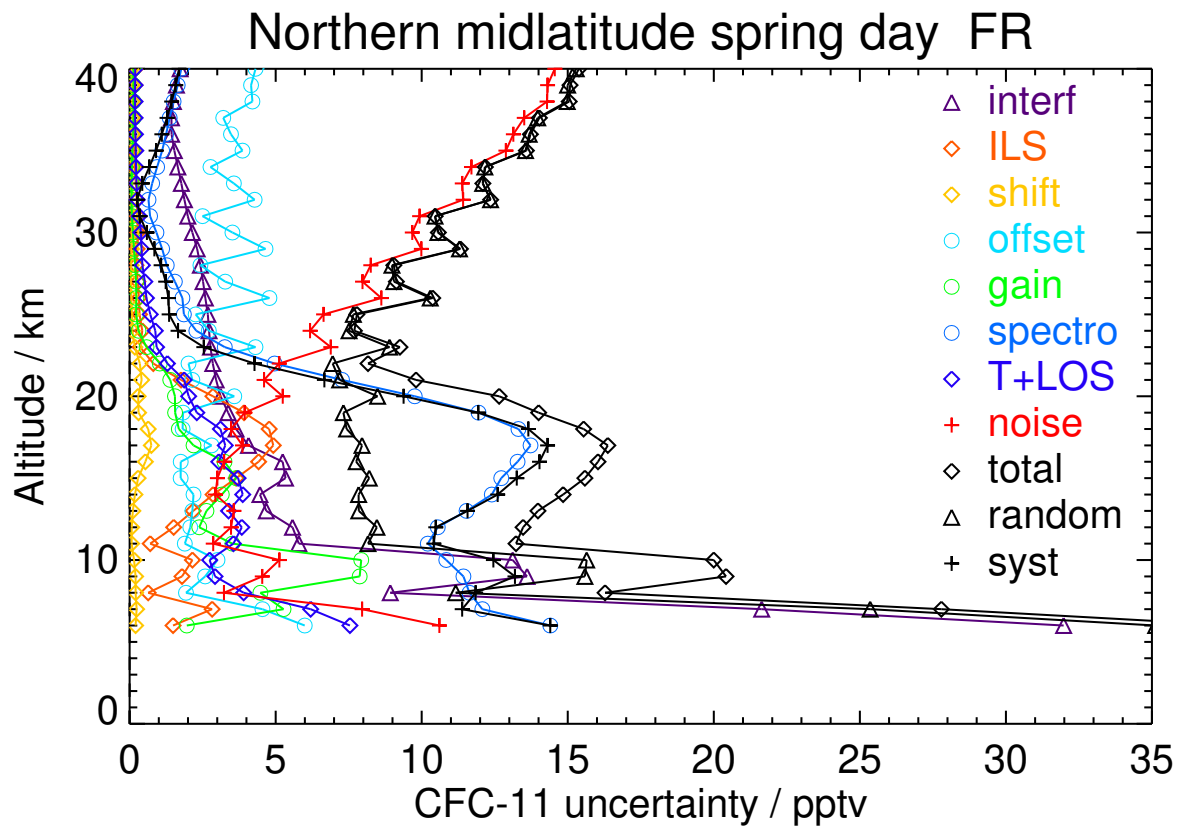

**Figure S11.** V8H\_F-11\_61 Northern midlatitude spring day

**Table S13.** CFC-11 error budget for Northern midlatitude spring night. All uncertainties are  $1\sigma$ .

| altitude<br>(km) | mean target<br>(pptv) | interf<br>(pptv) | ILS<br>(pptv) | shift<br>(pptv) | offset<br>(pptv) | gain<br>(pptv) | spectro<br>(pptv) | T+LOS<br>(pptv) | noise<br>(pptv) | random<br>(pptv) | syst<br>(pptv) | total<br>(pptv) |
|------------------|-----------------------|------------------|---------------|-----------------|------------------|----------------|-------------------|-----------------|-----------------|------------------|----------------|-----------------|
| 8                | 256.61                | 11.21            | 0.81          | 0.25            | 2.32             | 3.54           | 13.32             | 4.51            | 3.83            | 13.31            | 13.40          | 18.89           |
| 11               | 210.58                | 6.55             | 0.93          | 0.09            | 1.86             | 3.51           | 10.32             | 3.10            | 2.91            | 8.68             | 10.43          | 13.57           |
| 14               | 183.12                | 4.15             | 2.64          | 0.19            | 2.00             | 2.77           | 11.97             | 3.48            | 2.86            | 7.61             | 11.90          | 14.12           |
| 17               | 129.50                | 4.03             | 4.73          | 0.78            | 2.47             | 2.03           | 12.74             | 2.85            | 3.64            | 7.61             | 13.24          | 15.27           |
| 20               | 56.72                 | 3.10             | 2.27          | 0.17            | 3.17             | 1.31           | 7.66              | 1.67            | 4.90            | 7.78             | 7.17           | 10.58           |
| 23               | 28.07                 | 2.73             | 0.33          | 0.19            | 3.86             | 0.59           | 3.21              | 0.85            | 6.49            | 8.32             | 2.60           | 8.72            |
| 26               | 12.86                 | 2.58             | 0.29          | 0.04            | 4.34             | 0.25           | 1.80              | 0.56            | 8.18            | 9.69             | 1.52           | 9.80            |
| 29               | 6.64                  | 2.30             | 0.20          | 0.04            | 4.39             | 0.14           | 0.99              | 0.36            | 9.69            | 10.92            | 0.66           | 10.94           |
| 32               | 2.54                  | 1.79             | 0.18          | 0.09            | 3.95             | 0.08           | 0.69              | 0.27            | 11.13           | 11.97            | 0.25           | 11.97           |
| 35               | 2.51                  | 1.39             | 0.12          | 0.12            | 3.50             | 0.14           | 0.98              | 0.20            | 12.64           | 13.21            | 0.77           | 13.23           |
| 38               | 3.38                  | 1.43             | 0.19          | 0.09            | 3.85             | 0.13           | 1.57              | 0.19            | 14.19           | 14.79            | 1.51           | 14.86           |
| 41               | 8.30                  | 1.77             | 0.26          | 0.07            | 5.41             | 0.13           | 2.00              | 0.18            | 15.36           | 16.39            | 1.95           | 16.50           |

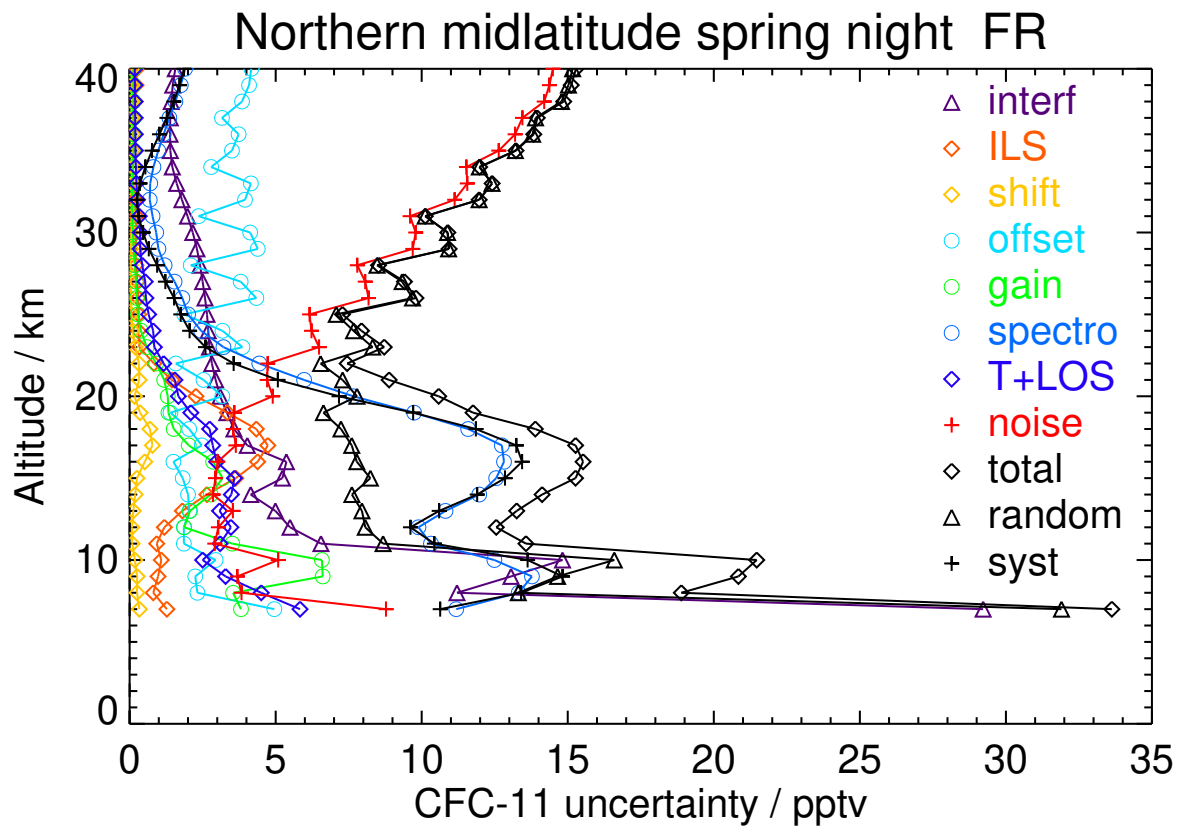

**Figure S12.** V8H\_F-11\_61 Northern midlatitude spring night

**Table S14.** CFC-11 error budget for Northern midlatitude summer day. All uncertainties are  $1\sigma$ .

| altitude<br>(km) | mean target<br>(pptv) | interf<br>(pptv) | ILS<br>(pptv) | shift<br>(pptv) | offset<br>(pptv) | gain<br>(pptv) | spectro<br>(pptv) | T+LOS<br>(pptv) | noise<br>(pptv) | random<br>(pptv) | syst<br>(pptv) | total<br>(pptv) |
|------------------|-----------------------|------------------|---------------|-----------------|------------------|----------------|-------------------|-----------------|-----------------|------------------|----------------|-----------------|
| 8                | 257.37                | 18.38            | 2.05          | 0.18            | 4.26             | 3.42           | 7.80              | 4.90            | 8.54            | 21.62            | 7.89           | 23.01           |
| 11               | 253.92                | 10.77            | 1.74          | 0.11            | 2.81             | 6.78           | 11.97             | 2.83            | 5.52            | 13.13            | 13.50          | 18.83           |
| 14               | 236.95                | 4.74             | 1.70          | 0.13            | 1.96             | 2.86           | 10.76             | 3.61            | 3.78            | 7.95             | 10.83          | 13.43           |
| 17               | 211.71                | 4.82             | 5.90          | 0.74            | 1.49             | 3.29           | 16.35             | 3.68            | 3.53            | 7.54             | 17.55          | 19.11           |
| 20               | 123.68                | 3.15             | 5.07          | 0.24            | 1.41             | 1.93           | 15.45             | 3.02            | 4.15            | 6.84             | 16.12          | 17.51           |
| 23               | 42.03                 | 2.72             | 0.38          | 0.58            | 1.58             | 1.19           | 6.18              | 1.75            | 5.31            | 6.62             | 6.12           | 9.01            |
| 26               | 13.58                 | 2.59             | 0.65          | 0.07            | 1.84             | 0.24           | 2.30              | 0.89            | 6.72            | 7.58             | 2.08           | 7.86            |
| 29               | 2.70                  | 2.42             | 0.17          | 0.03            | 2.02             | 0.07           | 0.80              | 0.47            | 8.23            | 8.85             | 0.40           | 8.86            |
| 32               | 2.52                  | 1.68             | 0.17          | 0.06            | 2.15             | 0.06           | 0.54              | 0.26            | 9.78            | 10.17            | 0.25           | 10.17           |
| 35               | 1.26                  | 1.48             | 0.10          | 0.11            | 2.38             | 0.07           | 0.96              | 0.20            | 11.54           | 11.89            | 0.81           | 11.91           |
| 38               | 0.20                  | 1.46             | 0.15          | 0.09            | 2.97             | 0.07           | 1.51              | 0.18            | 13.49           | 13.90            | 1.45           | 13.97           |
| 41               | 0.67                  | 1.40             | 0.18          | 0.05            | 4.12             | 0.11           | 1.84              | 0.19            | 14.58           | 15.22            | 1.79           | 15.33           |

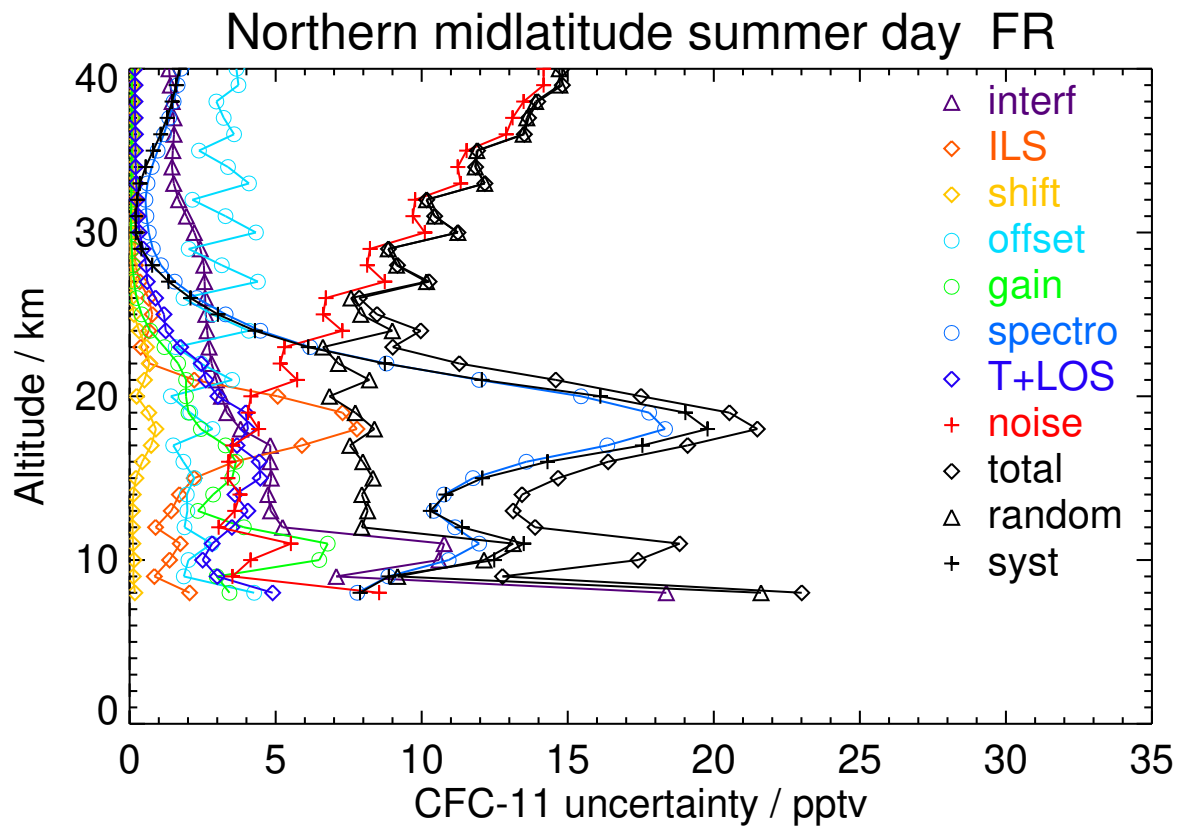

**Figure S13.** V8H\_F-11\_61 Northern midlatitude summer day

**Table S15.** CFC-11 error budget for Northern midlatitude summer night. All uncertainties are  $1\sigma$ .

| altitude<br>(km) | mean target<br>(pptv) | interf<br>(pptv) | ILS<br>(pptv) | shift<br>(pptv) | offset<br>(pptv) | gain<br>(pptv) | spectro<br>(pptv) | T+LOS<br>(pptv) | noise<br>(pptv) | random<br>(pptv) | syst<br>(pptv) | total<br>(pptv) |
|------------------|-----------------------|------------------|---------------|-----------------|------------------|----------------|-------------------|-----------------|-----------------|------------------|----------------|-----------------|
| 8                | 271.36                | 18.60            | 1.52          | 0.19            | 4.51             | 2.69           | 9.31              | 5.79            | 9.34            | 22.50            | 8.78           | 24.15           |
| 11               | 248.02                | 11.16            | 1.43          | 0.13            | 2.76             | 6.54           | 11.78             | 2.87            | 5.51            | 13.33            | 13.29          | 18.82           |
| 14               | 239.51                | 4.44             | 1.50          | 0.16            | 1.88             | 2.39           | 10.89             | 3.79            | 3.77            | 7.55             | 11.02          | 13.36           |
| 17               | 208.55                | 4.64             | 4.93          | 0.50            | 1.20             | 3.36           | 15.03             | 3.85            | 3.34            | 7.22             | 16.08          | 17.62           |
| 20               | 119.48                | 3.09             | 5.55          | 0.19            | 0.96             | 1.53           | 15.12             | 3.28            | 3.92            | 6.68             | 15.93          | 17.27           |
| 23               | 36.55                 | 2.71             | 0.31          | 0.50            | 0.97             | 1.10           | 6.06              | 1.88            | 5.06            | 6.35             | 5.95           | 8.70            |
| 26               | 11.79                 | 2.60             | 0.53          | 0.05            | 1.31             | 0.20           | 1.79              | 0.88            | 6.55            | 7.30             | 1.54           | 7.46            |
| 29               | 6.25                  | 2.39             | 0.17          | 0.03            | 1.71             | 0.09           | 0.96              | 0.46            | 8.19            | 8.74             | 0.62           | 8.77            |
| 32               | 0.41                  | 1.70             | 0.17          | 0.07            | 2.09             | 0.05           | 0.58              | 0.29            | 9.91            | 10.29            | 0.21           | 10.29           |
| 35               | 3.44                  | 1.38             | 0.11          | 0.11            | 2.56             | 0.08           | 1.01              | 0.19            | 11.72           | 12.09            | 0.85           | 12.12           |
| 38               | 5.56                  | 1.46             | 0.15          | 0.10            | 2.98             | 0.09           | 1.44              | 0.19            | 13.81           | 14.21            | 1.37           | 14.27           |
| 41               | 1.58                  | 1.41             | 0.18          | 0.07            | 4.15             | 0.12           | 1.79              | 0.19            | 14.76           | 15.40            | 1.74           | 15.50           |

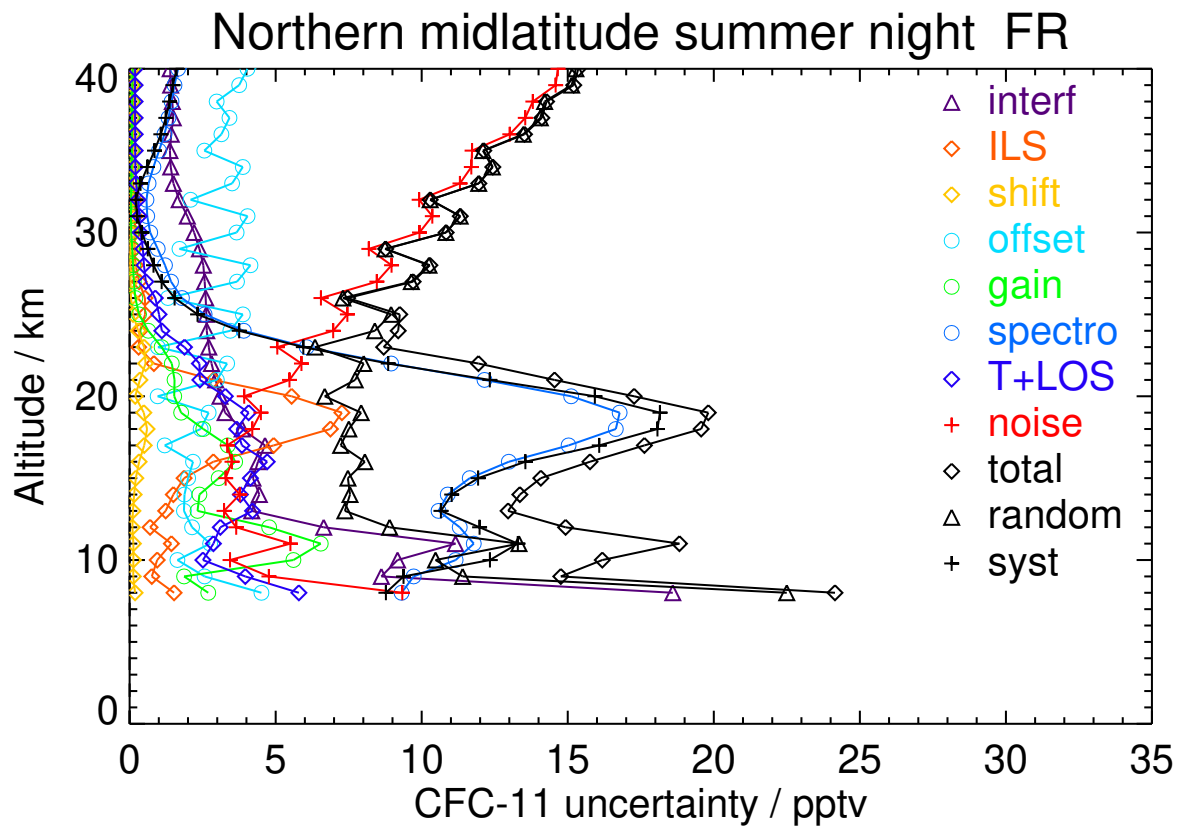

**Figure S14.** V8H\_F-11\_61 Northern midlatitude summer night



**Table S16.** CFC-11 error budget for Northern midlatitude autumn day. All uncertainties are  $1\sigma$ .

| altitude<br>(km) | mean target<br>(pptv) | interf<br>(pptv) | ILS<br>(pptv) | shift<br>(pptv) | offset<br>(pptv) | gain<br>(pptv) | spectro<br>(pptv) | T+LOS<br>(pptv) | noise<br>(pptv) | random<br>(pptv) | syst<br>(pptv) | total<br>(pptv) |
|------------------|-----------------------|------------------|---------------|-----------------|------------------|----------------|-------------------|-----------------|-----------------|------------------|----------------|-----------------|
| 8                | 275.27                | 15.12            | 6.06          | 0.13            | 3.38             | 3.96           | 13.46             | 4.76            | 5.83            | 19.03            | 12.96          | 23.03           |
| 11               | 242.67                | 10.77            | 1.68          | 0.09            | 2.27             | 5.17           | 10.76             | 2.59            | 4.14            | 12.54            | 11.54          | 17.04           |
| 14               | 245.20                | 4.96             | 2.18          | 0.19            | 1.91             | 2.53           | 12.12             | 4.17            | 3.47            | 8.26             | 12.14          | 14.68           |
| 17               | 188.66                | 4.73             | 5.60          | 0.56            | 1.62             | 3.30           | 17.76             | 4.67            | 3.38            | 8.18             | 18.69          | 20.40           |
| 20               | 85.81                 | 3.05             | 6.00          | 0.25            | 1.77             | 1.32           | 14.08             | 3.35            | 4.16            | 7.89             | 14.65          | 16.64           |
| 23               | 24.53                 | 2.68             | 0.68          | 0.22            | 2.12             | 0.70           | 4.61              | 1.53            | 5.51            | 7.26             | 3.73           | 8.17            |
| 26               | 11.21                 | 2.62             | 0.40          | 0.05            | 2.53             | 0.18           | 1.78              | 0.70            | 7.12            | 8.10             | 1.45           | 8.23            |
| 29               | 5.66                  | 2.27             | 0.17          | 0.04            | 2.87             | 0.09           | 0.88              | 0.41            | 8.86            | 9.63             | 0.46           | 9.64            |
| 32               | 9.43                  | 1.81             | 0.20          | 0.06            | 3.02             | 0.07           | 0.79              | 0.30            | 10.68           | 11.27            | 0.37           | 11.28           |
| 35               | 3.50                  | 1.30             | 0.12          | 0.07            | 3.23             | 0.06           | 0.86              | 0.24            | 12.53           | 13.03            | 0.59           | 13.04           |
| 38               | 4.19                  | 1.18             | 0.18          | 0.07            | 3.70             | 0.10           | 1.48              | 0.18            | 14.42           | 14.94            | 1.42           | 15.01           |
| 41               | 2.79                  | 1.47             | 0.23          | 0.05            | 5.50             | 0.09           | 1.92              | 0.20            | 15.62           | 16.63            | 1.88           | 16.73           |

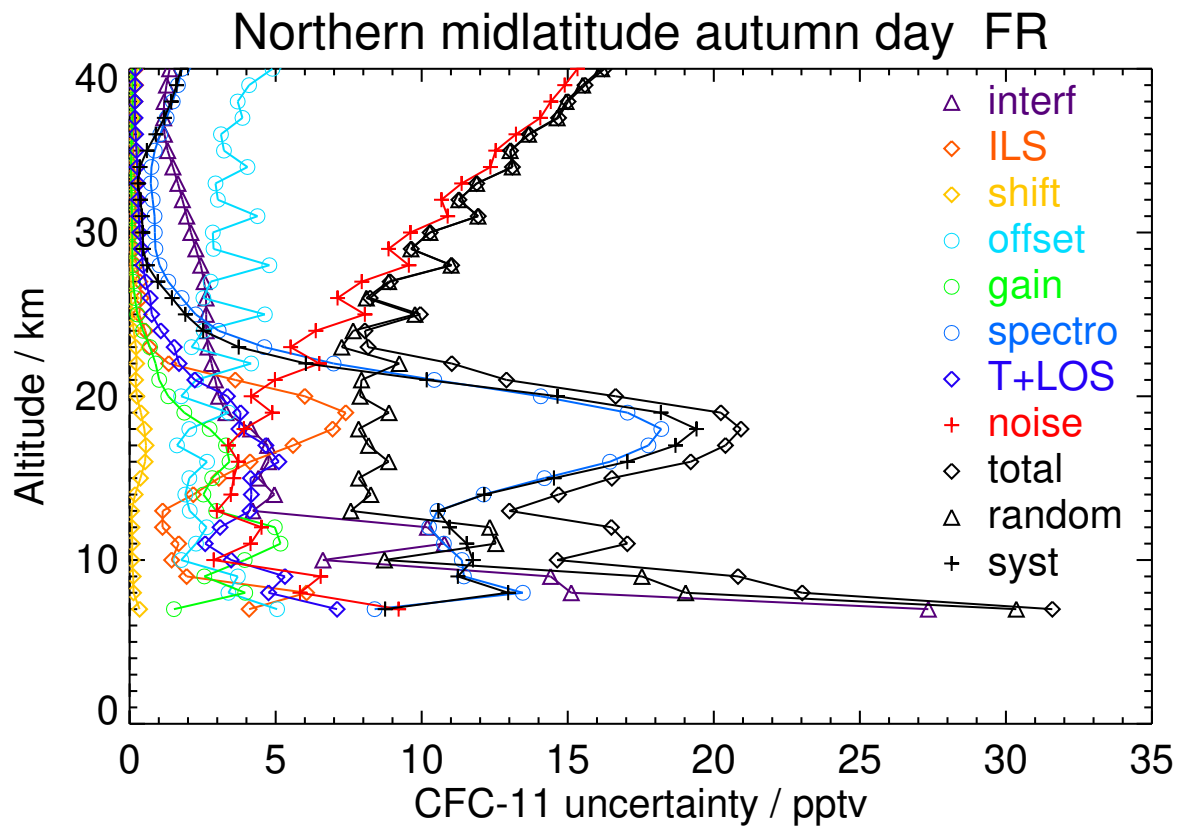

**Figure S15.** V8H\_F-11\_61 Northern midlatitude autumn day

**Table S17.** CFC-11 error budget for Northern midlatitude autumn night. All uncertainties are  $1\sigma$ .

| altitude<br>(km) | mean target<br>(pptv) | interf<br>(pptv) | ILS<br>(pptv) | shift<br>(pptv) | offset<br>(pptv) | gain<br>(pptv) | spectro<br>(pptv) | T+LOS<br>(pptv) | noise<br>(pptv) | random<br>(pptv) | syst<br>(pptv) | total<br>(pptv) |
|------------------|-----------------------|------------------|---------------|-----------------|------------------|----------------|-------------------|-----------------|-----------------|------------------|----------------|-----------------|
| 8                | 255.18                | 9.10             | 1.48          | 0.21            | 1.90             | 6.44           | 13.15             | 3.30            | 3.47            | 11.45            | 13.95          | 18.05           |
| 11               | 243.21                | 7.69             | 0.85          | 0.14            | 1.86             | 4.39           | 10.73             | 3.28            | 3.18            | 9.74             | 11.12          | 14.78           |
| 14               | 231.02                | 4.35             | 1.91          | 0.18            | 1.85             | 3.31           | 12.44             | 3.79            | 2.96            | 7.33             | 12.69          | 14.66           |
| 17               | 173.00                | 4.00             | 4.69          | 0.54            | 2.06             | 2.94           | 14.77             | 4.17            | 3.44            | 7.74             | 15.44          | 17.27           |
| 20               | 82.79                 | 3.08             | 4.86          | 0.23            | 2.45             | 1.62           | 11.93             | 2.84            | 4.57            | 7.66             | 12.42          | 14.59           |
| 23               | 27.53                 | 2.73             | 0.50          | 0.16            | 3.05             | 0.72           | 5.02              | 1.38            | 6.09            | 7.99             | 4.24           | 9.04            |
| 26               | 8.73                  | 2.58             | 0.31          | 0.05            | 3.60             | 0.24           | 1.97              | 0.69            | 7.81            | 9.14             | 1.32           | 9.23            |
| 29               | 6.16                  | 2.30             | 0.13          | 0.04            | 3.94             | 0.10           | 0.84              | 0.36            | 9.61            | 10.66            | 0.55           | 10.68           |
| 32               | 6.21                  | 1.73             | 0.17          | 0.06            | 3.73             | 0.06           | 0.67              | 0.27            | 11.26           | 12.01            | 0.27           | 12.01           |
| 35               | 7.92                  | 1.28             | 0.13          | 0.06            | 3.74             | 0.08           | 0.93              | 0.20            | 12.94           | 13.55            | 0.68           | 13.56           |
| 38               | 9.13                  | 1.19             | 0.18          | 0.06            | 4.00             | 0.11           | 1.47              | 0.19            | 14.76           | 15.36            | 1.28           | 15.41           |
| 41               | 6.13                  | 1.45             | 0.23          | 0.05            | 5.83             | 0.08           | 1.88              | 0.20            | 15.85           | 16.97            | 1.77           | 17.06           |

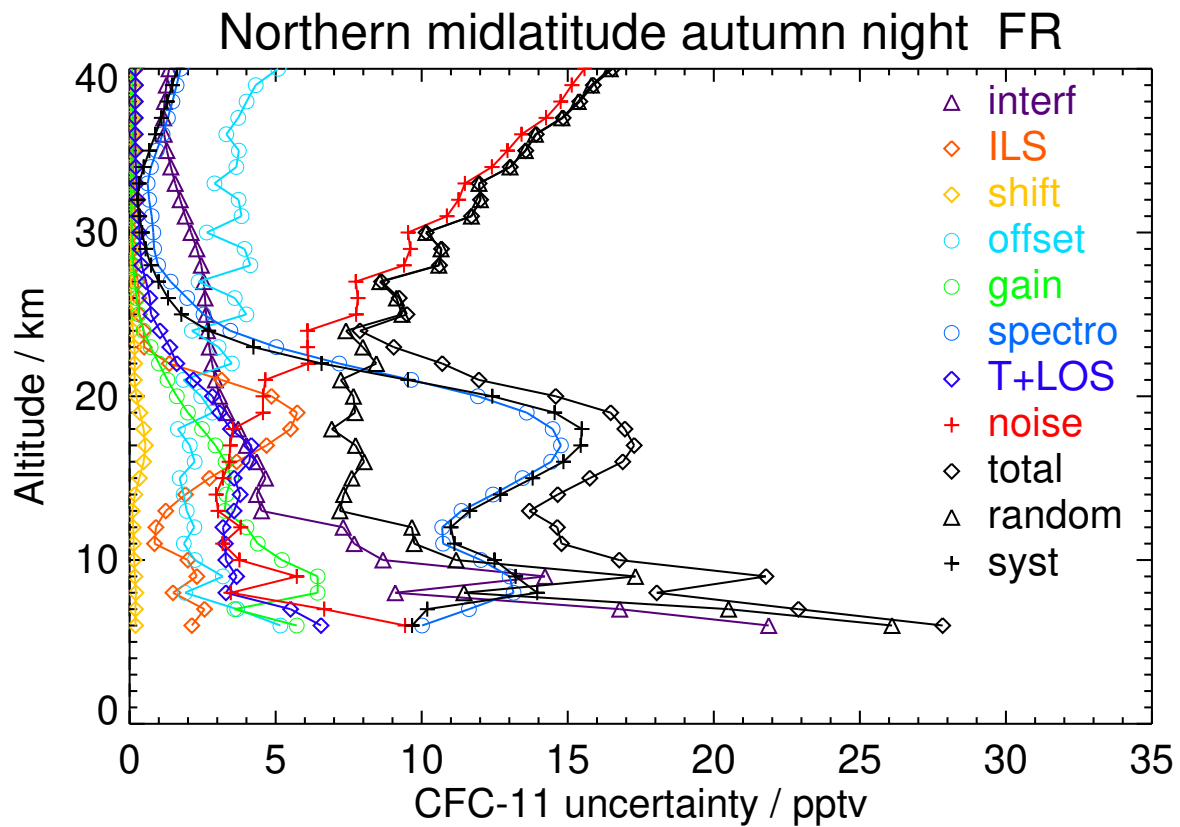**Figure S16.** V8H\_F-11\_61 Northern midlatitude autumn night

**Table S18.** CFC-11 error budget for Tropics day. All uncertainties are  $1\sigma$ .

| altitude<br>(km) | mean target<br>(pptv) | interf<br>(pptv) | ILS<br>(pptv) | shift<br>(pptv) | offset<br>(pptv) | gain<br>(pptv) | spectro<br>(pptv) | T+LOS<br>(pptv) | noise<br>(pptv) | random<br>(pptv) | syst<br>(pptv) | total<br>(pptv) |
|------------------|-----------------------|------------------|---------------|-----------------|------------------|----------------|-------------------|-----------------|-----------------|------------------|----------------|-----------------|
| 8                | 266.24                | 15.82            | 2.80          | 0.30            | 2.77             | 4.66           | 10.28             | 4.32            | 5.15            | 18.24            | 10.29          | 20.94           |
| 11               | 255.57                | 7.83             | 1.56          | 0.20            | 2.30             | 5.20           | 9.10              | 3.01            | 3.90            | 10.36            | 9.79           | 14.25           |
| 14               | 262.87                | 6.20             | 1.50          | 0.43            | 2.53             | 4.67           | 9.63              | 4.33            | 3.76            | 9.24             | 10.45          | 13.95           |
| 17               | 251.59                | 4.16             | 7.52          | 0.30            | 3.18             | 2.62           | 16.55             | 5.26            | 5.00            | 9.66             | 18.00          | 20.43           |
| 20               | 190.73                | 3.49             | 4.58          | 0.56            | 3.41             | 2.15           | 15.73             | 3.90            | 5.77            | 8.97             | 16.28          | 18.59           |
| 23               | 131.08                | 2.70             | 1.58          | 0.76            | 3.91             | 1.60           | 11.78             | 2.88            | 6.92            | 9.08             | 11.86          | 14.94           |
| 26               | 62.44                 | 2.61             | 2.03          | 0.31            | 4.32             | 0.85           | 8.54              | 1.90            | 8.28            | 10.03            | 8.66           | 13.25           |
| 29               | 12.24                 | 2.56             | 0.87          | 0.09            | 4.38             | 0.22           | 2.67              | 0.85            | 9.62            | 10.98            | 2.55           | 11.27           |
| 32               | 5.00                  | 1.90             | 0.32          | 0.09            | 4.20             | 0.07           | 0.77              | 0.36            | 10.94           | 11.90            | 0.34           | 11.91           |
| 35               | 3.04                  | 1.52             | 0.13          | 0.11            | 3.69             | 0.12           | 0.98              | 0.24            | 12.47           | 13.11            | 0.84           | 13.14           |
| 38               | 4.40                  | 1.54             | 0.13          | 0.09            | 3.96             | 0.10           | 1.46              | 0.24            | 13.90           | 14.54            | 1.36           | 14.61           |
| 41               | 2.37                  | 1.67             | 0.14          | 0.07            | 5.59             | 0.12           | 1.77              | 0.28            | 15.22           | 16.31            | 1.70           | 16.40           |

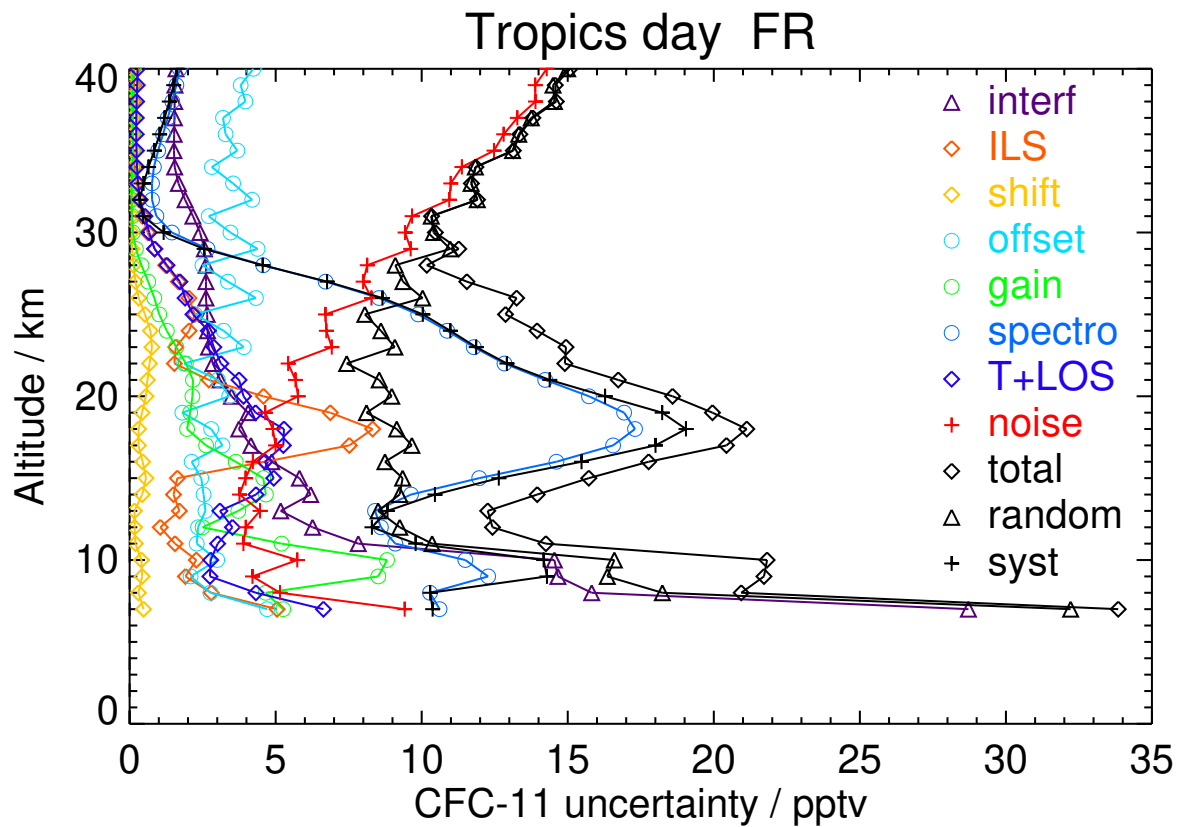

**Figure S17.** V8H\_F-11\_61 Tropics day

**Table S19.** CFC-11 error budget for Tropics night. All uncertainties are  $1\sigma$ .

| altitude<br>(km) | mean target<br>(pptv) | interf<br>(pptv) | ILS<br>(pptv) | shift<br>(pptv) | offset<br>(pptv) | gain<br>(pptv) | spectro<br>(pptv) | T+LOS<br>(pptv) | noise<br>(pptv) | random<br>(pptv) | syst<br>(pptv) | total<br>(pptv) |
|------------------|-----------------------|------------------|---------------|-----------------|------------------|----------------|-------------------|-----------------|-----------------|------------------|----------------|-----------------|
| 8                | 257.23                | 6.10             | 1.44          | 0.26            | 1.70             | 4.01           | 10.22             | 2.88            | 2.93            | 8.11             | 10.68          | 13.41           |
| 11               | 254.75                | 5.23             | 1.99          | 0.20            | 1.88             | 3.03           | 11.07             | 3.13            | 2.96            | 8.33             | 10.76          | 13.61           |
| 14               | 264.96                | 6.12             | 1.71          | 0.49            | 2.54             | 4.62           | 9.45              | 4.66            | 3.57            | 9.21             | 10.36          | 13.86           |
| 17               | 248.49                | 4.55             | 8.17          | 0.21            | 3.50             | 1.97           | 16.47             | 5.18            | 5.20            | 9.64             | 18.33          | 20.71           |
| 20               | 208.01                | 3.55             | 2.87          | 0.49            | 3.93             | 2.37           | 15.70             | 4.09            | 6.15            | 9.31             | 16.02          | 18.53           |
| 23               | 138.65                | 2.75             | 2.30          | 1.10            | 4.37             | 1.72           | 12.91             | 3.26            | 7.24            | 9.70             | 13.10          | 16.30           |
| 26               | 67.25                 | 2.57             | 2.05          | 0.29            | 4.75             | 0.81           | 8.62              | 1.99            | 8.51            | 10.36            | 8.79           | 13.59           |
| 29               | 15.12                 | 2.54             | 0.94          | 0.08            | 4.78             | 0.17           | 2.90              | 0.88            | 9.80            | 11.28            | 2.87           | 11.64           |
| 32               | 3.23                  | 1.80             | 0.18          | 0.11            | 4.43             | 0.06           | 0.71              | 0.33            | 11.11           | 12.12            | 0.36           | 12.12           |
| 35               | 2.82                  | 1.47             | 0.14          | 0.11            | 3.90             | 0.09           | 1.26              | 0.21            | 12.60           | 13.29            | 1.10           | 13.33           |
| 38               | 9.77                  | 1.47             | 0.12          | 0.09            | 3.97             | 0.10           | 1.44              | 0.20            | 13.98           | 14.62            | 1.34           | 14.68           |
| 41               | 6.92                  | 1.58             | 0.13          | 0.08            | 5.28             | 0.13           | 1.62              | 0.25            | 15.11           | 16.10            | 1.51           | 16.17           |

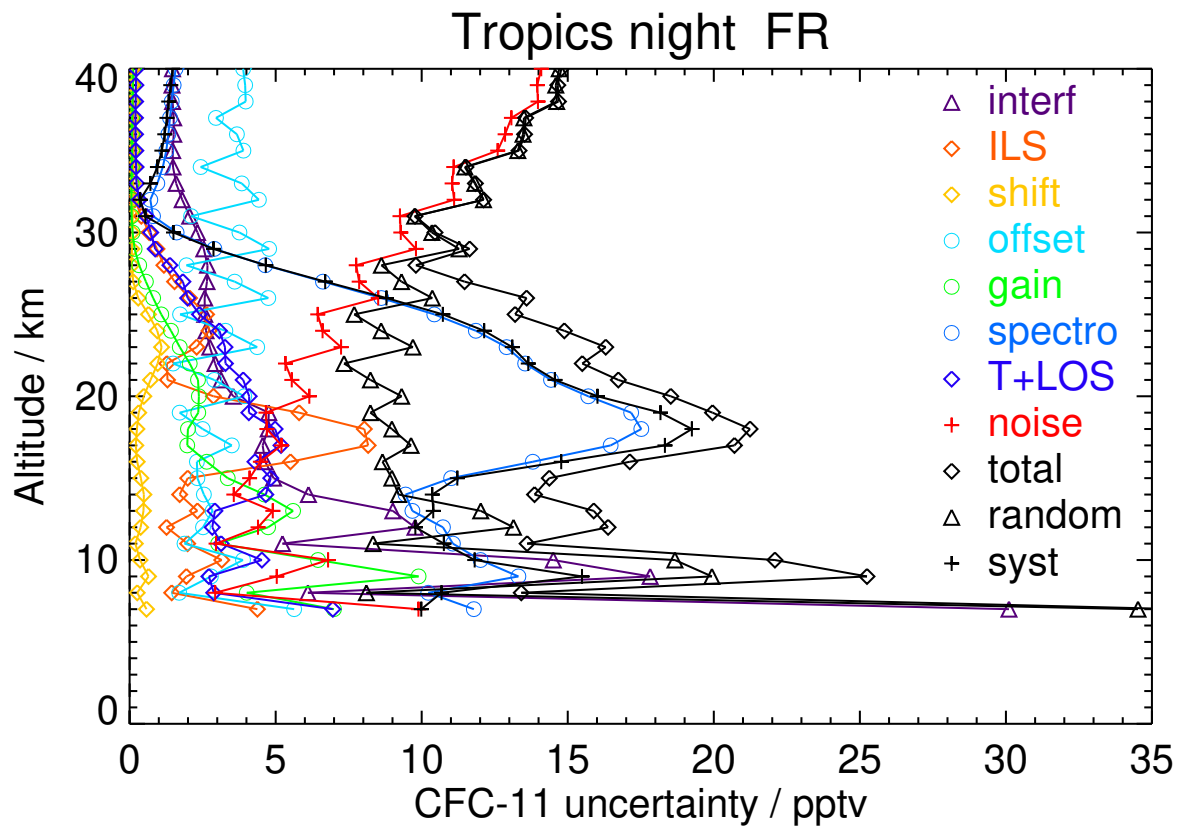

**Figure S18.** V8H\_F-11\_61 Tropics night

**Table S20.** CFC-11 error budget for Southern midlatitude winter day. All uncertainties are  $1\sigma$ .

| altitude<br>(km) | mean target<br>(pptv) | interf<br>(pptv) | ILS<br>(pptv) | shift<br>(pptv) | offset<br>(pptv) | gain<br>(pptv) | spectro<br>(pptv) | T+LOS<br>(pptv) | noise<br>(pptv) | random<br>(pptv) | syst<br>(pptv) | total<br>(pptv) |
|------------------|-----------------------|------------------|---------------|-----------------|------------------|----------------|-------------------|-----------------|-----------------|------------------|----------------|-----------------|
| 5                | 282.88                | 24.08            | 2.07          | 0.23            | 5.16             | 3.60           | 9.75              | 8.99            | 9.89            | 28.82            | 8.17           | 29.96           |
| 8                | 240.08                | 11.68            | 1.61          | 0.88            | 2.59             | 7.23           | 12.80             | 3.06            | 4.66            | 13.92            | 14.14          | 19.84           |
| 11               | 240.33                | 4.92             | 0.84          | 0.40            | 1.99             | 2.55           | 11.00             | 4.45            | 3.56            | 8.53             | 10.77          | 13.74           |
| 14               | 197.92                | 5.20             | 2.71          | 0.28            | 1.61             | 3.93           | 14.22             | 3.99            | 2.97            | 8.13             | 14.61          | 16.72           |
| 17               | 147.12                | 3.63             | 3.54          | 0.41            | 1.56             | 2.30           | 12.78             | 3.60            | 3.36            | 7.19             | 13.02          | 14.87           |
| 20               | 69.40                 | 3.15             | 3.57          | 0.24            | 1.83             | 1.73           | 10.38             | 2.51            | 4.58            | 7.17             | 10.61          | 12.81           |
| 23               | 30.34                 | 2.79             | 0.37          | 0.12            | 2.42             | 0.57           | 3.90              | 1.20            | 6.43            | 7.71             | 3.55           | 8.49            |
| 26               | 9.65                  | 2.61             | 0.24          | 0.06            | 3.06             | 0.32           | 2.52              | 0.73            | 8.74            | 9.72             | 2.30           | 9.98            |
| 29               | 4.07                  | 2.31             | 0.17          | 0.05            | 3.22             | 0.11           | 1.04              | 0.43            | 10.84           | 11.58            | 0.74           | 11.60           |
| 32               | 7.04                  | 1.71             | 0.16          | 0.07            | 3.23             | 0.08           | 0.76              | 0.31            | 12.82           | 13.36            | 0.28           | 13.36           |
| 35               | -0.02                 | 1.37             | 0.15          | 0.07            | 3.83             | 0.10           | 0.91              | 0.27            | 14.72           | 15.29            | 0.67           | 15.30           |
| 38               | -2.63                 | 1.53             | 0.18          | 0.07            | 5.22             | 0.19           | 1.68              | 0.27            | 16.28           | 17.18            | 1.60           | 17.25           |
| 41               | -1.83                 | 2.10             | 0.24          | 0.08            | 8.18             | 0.34           | 2.34              | 0.35            | 17.46           | 19.41            | 2.24           | 19.54           |

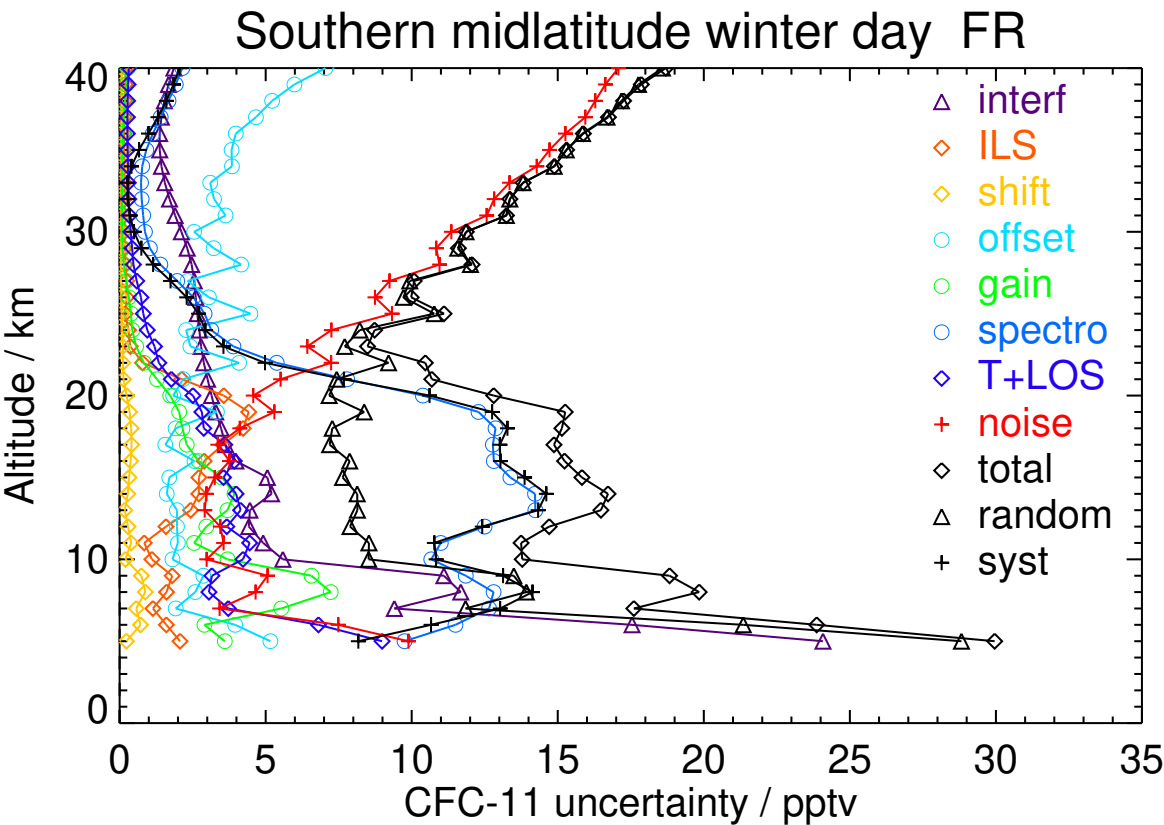

**Figure S19.** V8H\_F-11\_61 Southern midlatitude winter day

**Table S21.** CFC-11 error budget for Southern midlatitude winter night. All uncertainties are  $1\sigma$ .

| altitude<br>(km) | mean target<br>(pptv) | interf<br>(pptv) | ILS<br>(pptv) | shift<br>(pptv) | offset<br>(pptv) | gain<br>(pptv) | spectro<br>(pptv) | T+LOS<br>(pptv) | noise<br>(pptv) | random<br>(pptv) | syst<br>(pptv) | total<br>(pptv) |
|------------------|-----------------------|------------------|---------------|-----------------|------------------|----------------|-------------------|-----------------|-----------------|------------------|----------------|-----------------|
| 5                | 290.82                | 22.36            | 1.93          | 0.17            | 4.52             | 2.01           | 13.39             | 8.36            | 8.91            | 26.77            | 11.83          | 29.27           |
| 8                | 240.42                | 12.68            | 1.62          | 0.16            | 2.74             | 6.49           | 10.16             | 3.24            | 5.45            | 15.19            | 11.22          | 18.88           |
| 11               | 242.89                | 5.23             | 0.90          | 0.11            | 2.18             | 2.80           | 10.49             | 4.51            | 4.01            | 9.18             | 10.15          | 13.69           |
| 14               | 203.99                | 5.69             | 2.36          | 0.29            | 1.67             | 3.96           | 13.27             | 3.98            | 3.23            | 8.79             | 13.48          | 16.09           |
| 17               | 150.16                | 3.60             | 4.07          | 0.49            | 1.61             | 2.25           | 12.91             | 3.67            | 3.57            | 7.11             | 13.41          | 15.17           |
| 20               | 66.70                 | 3.07             | 3.94          | 0.31            | 1.85             | 1.54           | 10.64             | 2.55            | 4.76            | 7.72             | 10.66          | 13.16           |
| 23               | 24.84                 | 2.76             | 0.41          | 0.18            | 2.27             | 0.46           | 3.56              | 1.18            | 6.46            | 7.71             | 3.10           | 8.31            |
| 26               | 6.43                  | 2.60             | 0.29          | 0.06            | 2.86             | 0.25           | 1.93              | 0.63            | 8.53            | 9.45             | 1.64           | 9.59            |
| 29               | 6.66                  | 2.31             | 0.16          | 0.05            | 3.30             | 0.11           | 1.16              | 0.41            | 10.54           | 11.32            | 0.79           | 11.35           |
| 32               | 3.84                  | 1.78             | 0.16          | 0.06            | 3.49             | 0.07           | 0.70              | 0.28            | 12.45           | 13.08            | 0.27           | 13.08           |
| 35               | 5.78                  | 1.51             | 0.14          | 0.07            | 3.87             | 0.08           | 1.01              | 0.21            | 14.38           | 14.98            | 0.86           | 15.01           |
| 38               | 8.38                  | 1.49             | 0.19          | 0.06            | 4.98             | 0.10           | 1.55              | 0.21            | 15.93           | 16.77            | 1.46           | 16.83           |
| 41               | 5.02                  | 1.73             | 0.26          | 0.06            | 7.67             | 0.11           | 1.92              | 0.23            | 17.07           | 18.80            | 1.84           | 18.89           |

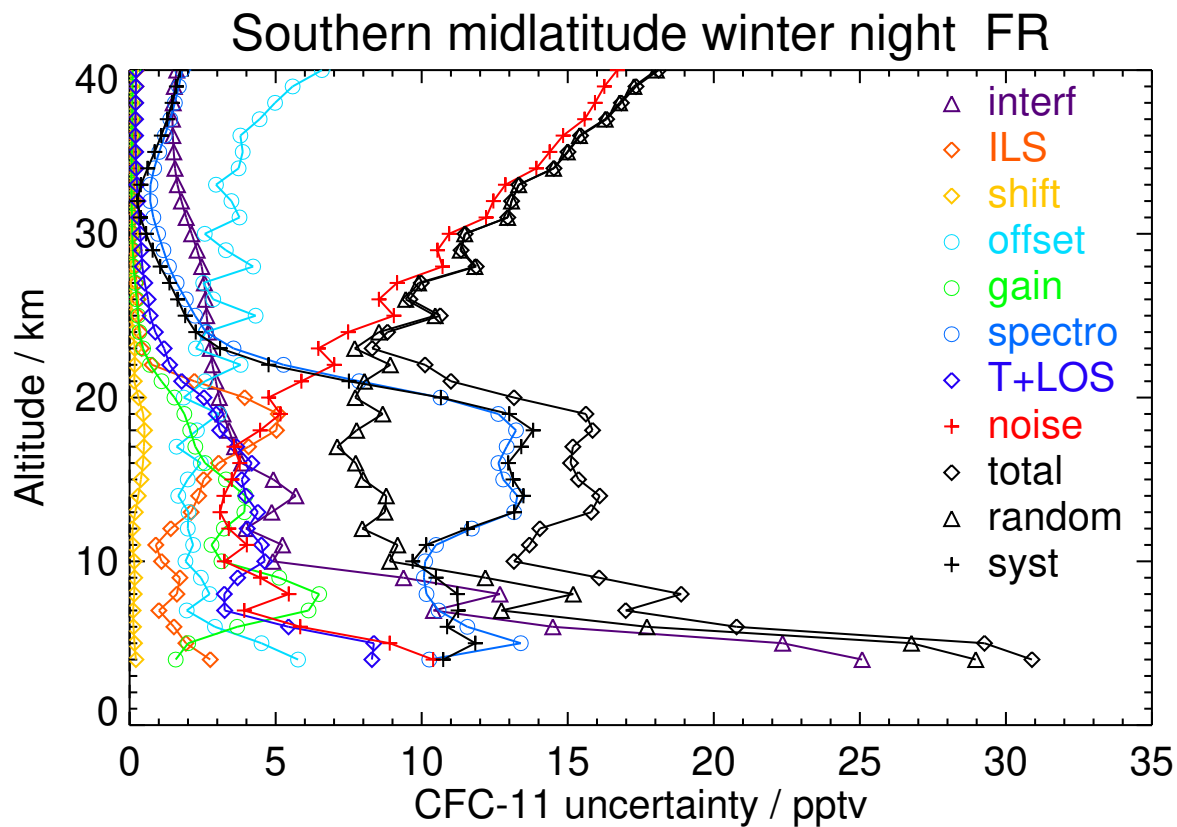

**Figure S20.** V8H\_F-11\_61 Southern midlatitude winter night

**Table S22.** CFC-11 error budget for Southern midlatitude spring day. All uncertainties are  $1\sigma$ .

| altitude<br>(km) | mean target<br>(pptv) | interf<br>(pptv) | ILS<br>(pptv) | shift<br>(pptv) | offset<br>(pptv) | gain<br>(pptv) | spectro<br>(pptv) | T+LOS<br>(pptv) | noise<br>(pptv) | random<br>(pptv) | syst<br>(pptv) | total<br>(pptv) |
|------------------|-----------------------|------------------|---------------|-----------------|------------------|----------------|-------------------|-----------------|-----------------|------------------|----------------|-----------------|
| 8                | 249.24                | 10.49            | 1.30          | 0.19            | 1.93             | 6.59           | 12.90             | 3.34            | 3.54            | 12.45            | 13.92          | 18.68           |
| 11               | 229.95                | 5.09             | 1.21          | 0.11            | 1.86             | 2.47           | 11.60             | 4.52            | 3.08            | 8.51             | 11.36          | 14.19           |
| 14               | 185.07                | 5.21             | 4.88          | 0.30            | 1.93             | 3.26           | 14.88             | 4.30            | 2.95            | 10.02            | 14.62          | 17.72           |
| 17               | 119.98                | 3.90             | 4.89          | 0.44            | 2.24             | 1.80           | 12.97             | 3.40            | 3.54            | 8.76             | 12.77          | 15.48           |
| 20               | 51.27                 | 3.04             | 3.49          | 0.46            | 2.72             | 1.11           | 7.92              | 2.02            | 4.67            | 8.09             | 7.30           | 10.90           |
| 23               | 27.88                 | 2.81             | 0.40          | 0.18            | 3.38             | 0.45           | 2.98              | 0.94            | 6.16            | 7.83             | 2.46           | 8.21            |
| 26               | 12.05                 | 2.62             | 0.31          | 0.06            | 3.90             | 0.27           | 1.71              | 0.62            | 7.68            | 9.09             | 1.38           | 9.19            |
| 29               | 9.64                  | 2.47             | 0.22          | 0.05            | 4.19             | 0.12           | 0.98              | 0.40            | 9.21            | 10.46            | 0.59           | 10.48           |
| 32               | 2.25                  | 1.89             | 0.21          | 0.08            | 4.21             | 0.07           | 0.56              | 0.28            | 10.85           | 11.81            | 0.27           | 11.81           |
| 35               | 4.94                  | 1.61             | 0.15          | 0.10            | 4.10             | 0.10           | 0.91              | 0.21            | 12.33           | 13.12            | 0.61           | 13.13           |
| 38               | 5.27                  | 1.61             | 0.15          | 0.09            | 3.86             | 0.14           | 1.36              | 0.19            | 14.10           | 14.73            | 1.23           | 14.78           |
| 41               | 4.87                  | 1.77             | 0.18          | 0.06            | 4.90             | 0.15           | 1.63              | 0.19            | 15.20           | 16.08            | 1.51           | 16.15           |

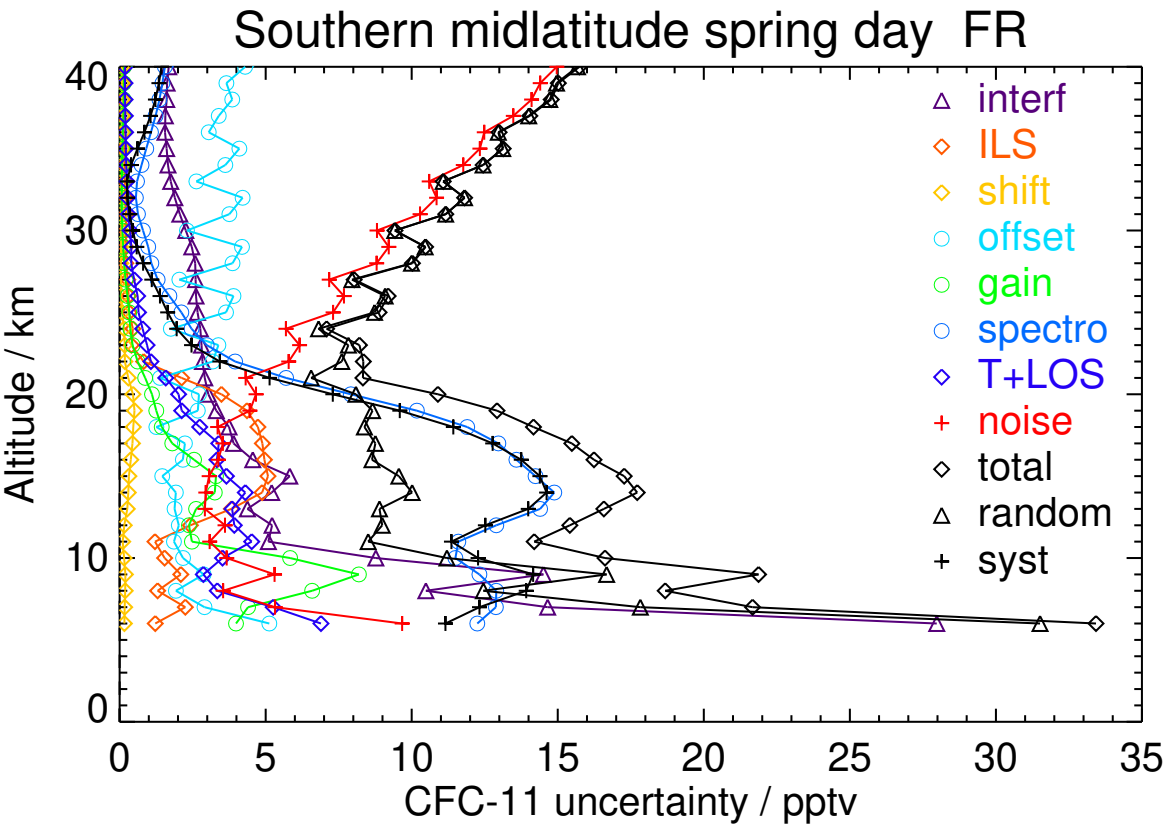

**Figure S21.** V8H\_F-11\_61 Southern midlatitude spring day

**Table S23.** CFC-11 error budget for Southern midlatitude spring night. All uncertainties are  $1\sigma$ .

| altitude<br>(km) | mean target<br>(pptv) | interf<br>(pptv) | ILS<br>(pptv) | shift<br>(pptv) | offset<br>(pptv) | gain<br>(pptv) | spectro<br>(pptv) | T+LOS<br>(pptv) | noise<br>(pptv) | random<br>(pptv) | syst<br>(pptv) | total<br>(pptv) |
|------------------|-----------------------|------------------|---------------|-----------------|------------------|----------------|-------------------|-----------------|-----------------|------------------|----------------|-----------------|
| 8                | 244.53                | 14.49            | 1.46          | 0.19            | 2.41             | 8.01           | 12.85             | 3.23            | 4.35            | 16.44            | 14.36          | 21.83           |
| 11               | 226.56                | 6.40             | 1.10          | 0.13            | 1.94             | 2.01           | 10.21             | 4.34            | 3.33            | 9.45             | 9.74           | 13.57           |
| 14               | 190.42                | 5.74             | 3.26          | 0.20            | 1.78             | 4.23           | 12.93             | 3.83            | 2.81            | 8.50             | 13.49          | 15.95           |
| 17               | 129.27                | 3.75             | 4.36          | 0.39            | 1.98             | 2.17           | 11.36             | 3.47            | 3.18            | 7.28             | 11.84          | 13.90           |
| 20               | 66.23                 | 2.89             | 3.66          | 0.49            | 2.48             | 1.61           | 8.03              | 2.17            | 4.18            | 6.98             | 8.29           | 10.84           |
| 23               | 33.75                 | 2.81             | 0.37          | 0.19            | 3.25             | 0.60           | 3.36              | 1.10            | 5.67            | 7.34             | 3.14           | 7.98            |
| 26               | 15.71                 | 2.53             | 0.37          | 0.04            | 3.95             | 0.38           | 2.00              | 0.68            | 7.36            | 8.84             | 1.68           | 9.00            |
| 29               | 11.76                 | 2.30             | 0.17          | 0.03            | 4.50             | 0.17           | 0.95              | 0.39            | 9.18            | 10.52            | 0.55           | 10.53           |
| 32               | 5.48                  | 1.62             | 0.17          | 0.05            | 4.43             | 0.12           | 0.71              | 0.27            | 10.93           | 11.92            | 0.32           | 11.93           |
| 35               | 3.88                  | 1.18             | 0.10          | 0.08            | 4.10             | 0.11           | 0.69              | 0.19            | 12.61           | 13.32            | 0.45           | 13.33           |
| 38               | 5.50                  | 1.13             | 0.15          | 0.08            | 3.83             | 0.13           | 1.24              | 0.19            | 14.39           | 14.94            | 1.13           | 14.99           |
| 41               | 5.36                  | 1.30             | 0.23          | 0.06            | 4.93             | 0.10           | 1.72              | 0.23            | 15.52           | 16.34            | 1.67           | 16.43           |

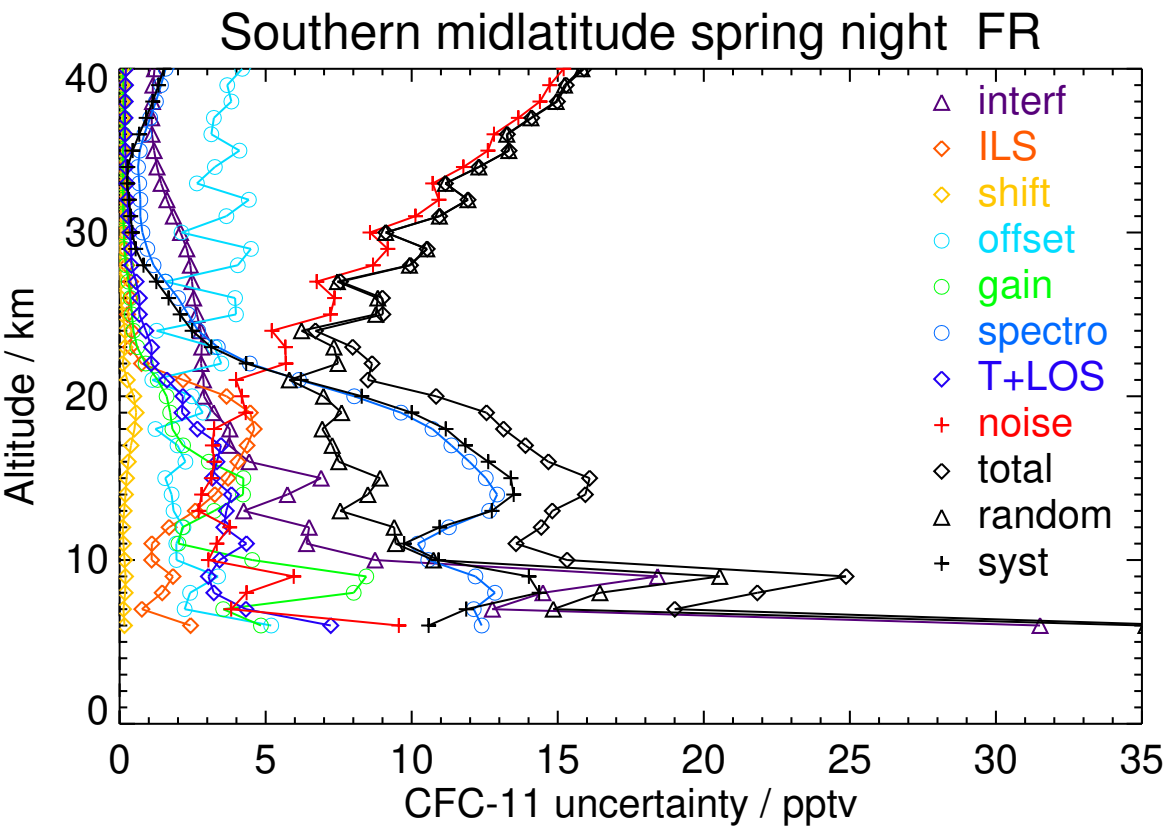

**Figure S22.** V8H\_F-11\_61 Southern midlatitude spring night



**Table S24.** CFC-11 error budget for Southern midlatitude summer day. All uncertainties are  $1\sigma$ .

| altitude<br>(km) | mean target<br>(pptv) | interf<br>(pptv) | ILS<br>(pptv) | shift<br>(pptv) | offset<br>(pptv) | gain<br>(pptv) | spectro<br>(pptv) | T+LOS<br>(pptv) | noise<br>(pptv) | random<br>(pptv) | syst<br>(pptv) | total<br>(pptv) |
|------------------|-----------------------|------------------|---------------|-----------------|------------------|----------------|-------------------|-----------------|-----------------|------------------|----------------|-----------------|
| 5                | 256.27                | 23.10            | 1.28          | 0.21            | 4.81             | 4.32           | 9.94              | 7.45            | 10.02           | 26.94            | 10.30          | 28.84           |
| 8                | 246.67                | 13.94            | 1.81          | 0.79            | 2.84             | 8.33           | 12.89             | 3.20            | 5.30            | 16.01            | 14.96          | 21.91           |
| 11               | 232.35                | 4.73             | 0.53          | 0.41            | 2.07             | 2.59           | 10.25             | 4.22            | 3.79            | 8.41             | 10.02          | 13.08           |
| 14               | 200.54                | 5.48             | 2.18          | 0.23            | 1.51             | 3.56           | 11.41             | 3.50            | 3.01            | 7.91             | 11.77          | 14.18           |
| 17               | 161.05                | 3.77             | 4.79          | 0.43            | 1.24             | 1.96           | 12.36             | 3.43            | 3.10            | 6.44             | 13.24          | 14.73           |
| 20               | 73.26                 | 2.92             | 5.17          | 0.23            | 1.32             | 1.34           | 10.78             | 2.64            | 3.92            | 6.34             | 11.71          | 13.31           |
| 23               | 23.93                 | 2.83             | 0.54          | 0.37            | 1.70             | 0.49           | 3.16              | 1.25            | 5.19            | 6.39             | 3.03           | 7.07            |
| 26               | 9.36                  | 2.62             | 0.37          | 0.06            | 2.14             | 0.17           | 1.33              | 0.63            | 6.69            | 7.57             | 1.08           | 7.65            |
| 29               | 7.22                  | 2.36             | 0.14          | 0.03            | 2.59             | 0.08           | 0.72              | 0.40            | 8.30            | 9.04             | 0.40           | 9.05            |
| 32               | 2.44                  | 1.87             | 0.25          | 0.09            | 2.95             | 0.07           | 0.55              | 0.29            | 9.97            | 10.58            | 0.28           | 10.59           |
| 35               | 4.97                  | 1.90             | 0.09          | 0.13            | 3.31             | 0.07           | 0.97              | 0.19            | 11.78           | 12.40            | 0.85           | 12.43           |
| 38               | 3.20                  | 1.59             | 0.16          | 0.12            | 3.18             | 0.11           | 1.44              | 0.19            | 13.57           | 14.04            | 1.35           | 14.10           |
| 41               | 0.55                  | 1.83             | 0.18          | 0.09            | 3.90             | 0.13           | 1.68              | 0.19            | 14.60           | 15.23            | 1.63           | 15.31           |

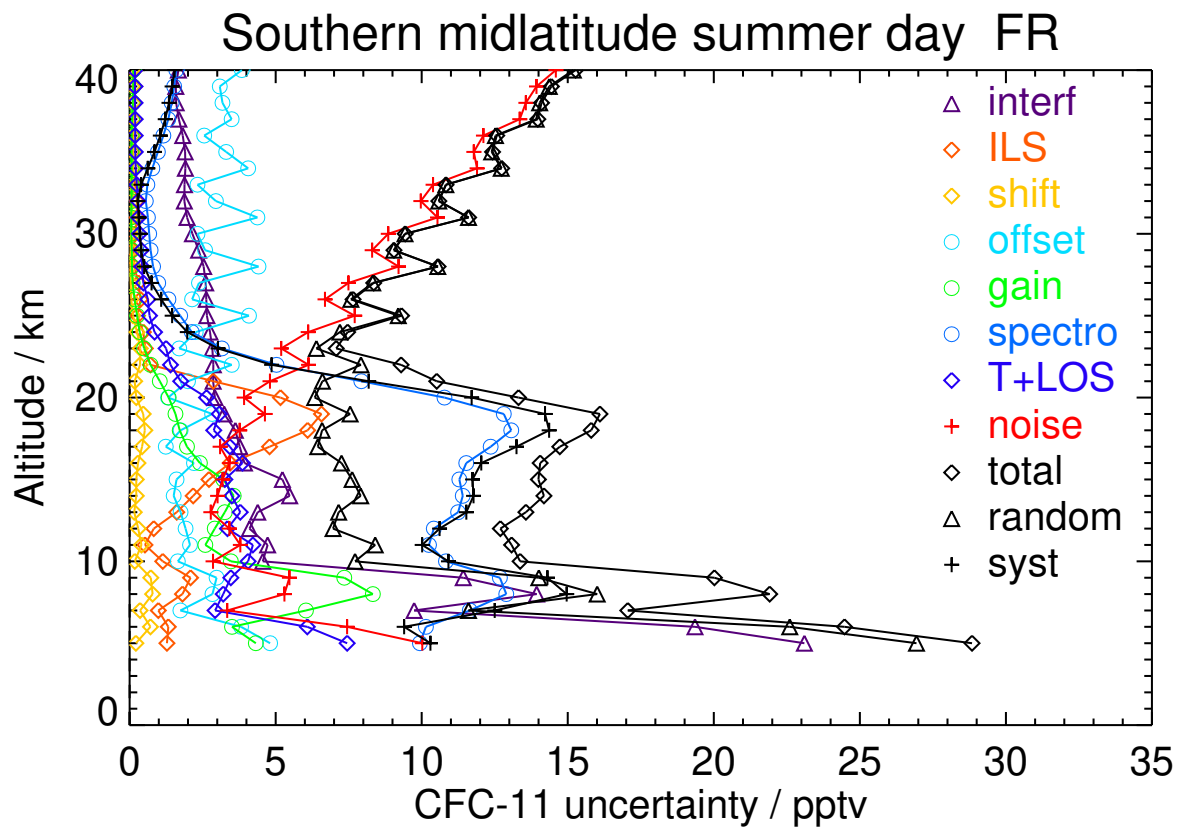

**Figure S23.** V8H\_F-11\_61 Southern midlatitude summer day

**Table S25.** CFC-11 error budget for Southern midlatitude summer night. All uncertainties are  $1\sigma$ .

| altitude<br>(km) | mean target<br>(pptv) | interf<br>(pptv) | ILS<br>(pptv) | shift<br>(pptv) | offset<br>(pptv) | gain<br>(pptv) | spectro<br>(pptv) | T+LOS<br>(pptv) | noise<br>(pptv) | random<br>(pptv) | syst<br>(pptv) | total<br>(pptv) |
|------------------|-----------------------|------------------|---------------|-----------------|------------------|----------------|-------------------|-----------------|-----------------|------------------|----------------|-----------------|
| 5                | 292.48                | 31.07            | 2.56          | 0.23            | 5.40             | 5.21           | 12.82             | 8.27            | 10.73           | 35.42            | 11.02          | 37.09           |
| 8                | 255.80                | 16.95            | 2.49          | 0.14            | 3.59             | 5.93           | 10.48             | 4.65            | 6.86            | 20.18            | 10.61          | 22.81           |
| 11               | 232.25                | 9.97             | 1.68          | 0.17            | 2.46             | 4.49           | 11.18             | 3.12            | 4.56            | 12.45            | 11.37          | 16.85           |
| 14               | 219.74                | 5.22             | 3.07          | 0.24            | 1.74             | 3.40           | 12.70             | 3.61            | 3.40            | 8.07             | 13.12          | 15.40           |
| 17               | 168.04                | 4.74             | 6.35          | 0.57            | 1.40             | 2.72           | 15.49             | 3.61            | 3.35            | 7.71             | 16.65          | 18.35           |
| 20               | 82.29                 | 3.07             | 4.84          | 0.23            | 1.39             | 1.50           | 11.27             | 2.63            | 4.11            | 6.55             | 12.04          | 13.71           |
| 23               | 24.35                 | 2.80             | 0.47          | 0.43            | 1.70             | 0.77           | 3.98              | 1.37            | 5.34            | 6.64             | 3.73           | 7.61            |
| 26               | 6.02                  | 2.68             | 0.45          | 0.06            | 2.09             | 0.14           | 1.26              | 0.68            | 6.80            | 7.67             | 1.09           | 7.74            |
| 29               | 4.42                  | 2.34             | 0.14          | 0.04            | 2.47             | 0.05           | 0.59              | 0.37            | 8.36            | 9.05             | 0.21           | 9.05            |
| 32               | 7.61                  | 1.83             | 0.22          | 0.08            | 2.82             | 0.08           | 0.60              | 0.25            | 9.93            | 10.50            | 0.36           | 10.50           |
| 35               | 6.69                  | 1.82             | 0.11          | 0.14            | 3.06             | 0.08           | 0.88              | 0.20            | 11.67           | 12.22            | 0.68           | 12.23           |
| 38               | 2.61                  | 1.51             | 0.15          | 0.11            | 3.05             | 0.11           | 1.38              | 0.18            | 13.47           | 13.90            | 1.32           | 13.96           |
| 41               | 4.05                  | 1.86             | 0.20          | 0.07            | 3.90             | 0.13           | 1.69              | 0.18            | 14.48           | 15.12            | 1.66           | 15.21           |

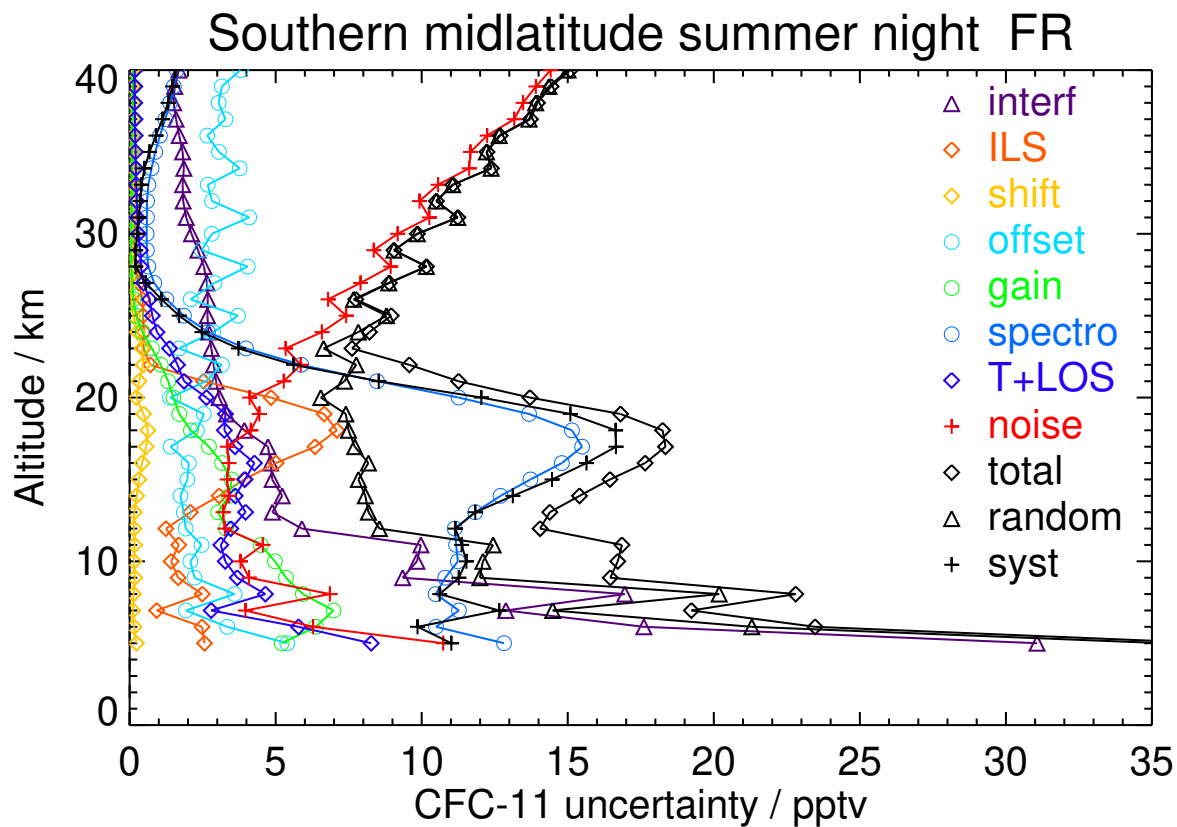

**Figure S24.** V8H\_F-11\_61 Southern midlatitude summer night

Table S26. CFC-11 error budget for Southern midlatitude autumn day. All uncertainties are  $1\sigma$ .

| altitude<br>(km) | mean target<br>(pptv) | interf<br>(pptv) | ILS<br>(pptv) | shift<br>(pptv) | offset<br>(pptv) | gain<br>(pptv) | spectro<br>(pptv) | T+LOS<br>(pptv) | noise<br>(pptv) | random<br>(pptv) | syst<br>(pptv) | total<br>(pptv) |
|------------------|-----------------------|------------------|---------------|-----------------|------------------|----------------|-------------------|-----------------|-----------------|------------------|----------------|-----------------|
| 5                | 277.33                | 16.87            | 1.36          | 0.15            | 4.16             | 1.60           | 12.11             | 7.32            | 7.28            | 20.22            | 12.29          | 23.66           |
| 8                | 258.54                | 13.01            | 1.25          | 0.18            | 2.68             | 4.48           | 12.54             | 4.44            | 4.60            | 15.40            | 12.62          | 19.90           |
| 11               | 236.24                | 7.35             | 0.85          | 0.08            | 2.12             | 4.10           | 9.77              | 3.20            | 3.34            | 9.43             | 10.20          | 13.89           |
| 14               | 221.75                | 4.40             | 2.82          | 0.21            | 2.02             | 3.52           | 13.68             | 3.80            | 3.00            | 7.44             | 14.10          | 15.95           |
| 17               | 153.43                | 4.06             | 5.30          | 0.78            | 2.38             | 2.67           | 14.72             | 3.03            | 3.66            | 7.28             | 15.63          | 17.24           |
| 20               | 76.23                 | 3.12             | 2.13          | 0.20            | 2.98             | 1.72           | 10.73             | 1.94            | 4.89            | 7.95             | 10.28          | 13.00           |
| 23               | 19.11                 | 2.71             | 0.46          | 0.19            | 3.51             | 0.65           | 3.81              | 1.00            | 6.44            | 8.11             | 3.40           | 8.80            |
| 26               | 12.88                 | 2.56             | 0.17          | 0.03            | 3.79             | 0.16           | 1.42              | 0.54            | 8.04            | 9.31             | 1.12           | 9.37            |
| 29               | 6.61                  | 2.20             | 0.13          | 0.04            | 3.70             | 0.13           | 1.04              | 0.39            | 9.70            | 10.64            | 0.88           | 10.67           |
| 32               | 7.65                  | 1.66             | 0.12          | 0.04            | 3.41             | 0.08           | 0.59              | 0.29            | 11.33           | 11.96            | 0.33           | 11.97           |
| 35               | 4.20                  | 1.29             | 0.09          | 0.05            | 3.29             | 0.10           | 0.78              | 0.23            | 13.23           | 13.70            | 0.59           | 13.71           |
| 38               | -2.10                 | 1.13             | 0.19          | 0.05            | 4.16             | 0.10           | 1.62              | 0.20            | 14.89           | 15.51            | 1.55           | 15.59           |
| 41               | 0.33                  | 1.31             | 0.28          | 0.04            | 6.75             | 0.09           | 2.27              | 0.20            | 16.32           | 17.71            | 2.24           | 17.86           |

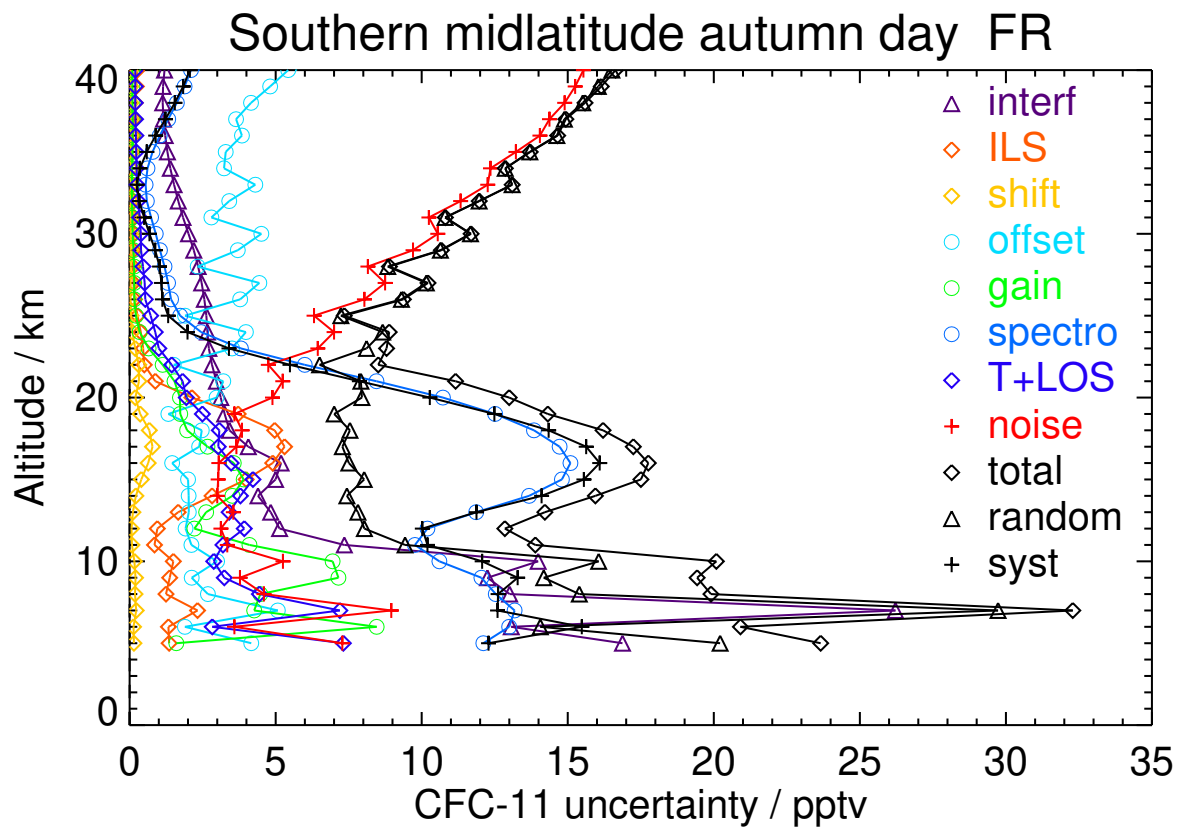

Figure S25. V8H\_F-11\_61 Southern midlatitude autumn day

**Table S27.** CFC-11 error budget for Southern midlatitude autumn night. All uncertainties are  $1\sigma$ .

| altitude<br>(km) | mean target<br>(pptv) | interf<br>(pptv) | ILS<br>(pptv) | shift<br>(pptv) | offset<br>(pptv) | gain<br>(pptv) | spectro<br>(pptv) | T+LOS<br>(pptv) | noise<br>(pptv) | random<br>(pptv) | syst<br>(pptv) | total<br>(pptv) |
|------------------|-----------------------|------------------|---------------|-----------------|------------------|----------------|-------------------|-----------------|-----------------|------------------|----------------|-----------------|
| 8                | 249.18                | 9.38             | 1.11          | 0.15            | 1.76             | 5.10           | 11.27             | 3.23            | 3.05            | 11.17            | 11.84          | 16.28           |
| 11               | 245.97                | 5.12             | 1.15          | 0.11            | 1.90             | 3.08           | 9.87              | 3.79            | 2.81            | 8.01             | 9.80           | 12.66           |
| 14               | 229.23                | 4.77             | 2.65          | 0.20            | 2.23             | 3.56           | 13.73             | 4.24            | 2.96            | 8.33             | 13.90          | 16.21           |
| 17               | 175.90                | 3.95             | 5.77          | 0.91            | 2.84             | 2.39           | 16.75             | 3.44            | 3.95            | 7.93             | 17.57          | 19.28           |
| 20               | 87.23                 | 3.11             | 1.78          | 0.30            | 3.57             | 1.85           | 11.36             | 2.17            | 5.33            | 8.01             | 11.28          | 13.84           |
| 23               | 27.45                 | 2.72             | 0.50          | 0.25            | 4.16             | 0.81           | 4.80              | 1.10            | 6.90            | 8.87             | 4.34           | 9.88            |
| 26               | 9.61                  | 2.57             | 0.25          | 0.05            | 4.41             | 0.16           | 1.53              | 0.58            | 8.39            | 9.89             | 1.21           | 9.96            |
| 29               | 8.17                  | 2.26             | 0.17          | 0.04            | 4.10             | 0.10           | 1.06              | 0.40            | 9.81            | 10.90            | 0.77           | 10.93           |
| 32               | 4.41                  | 1.77             | 0.16          | 0.06            | 3.52             | 0.06           | 0.74              | 0.30            | 11.24           | 11.94            | 0.34           | 11.94           |
| 35               | 3.40                  | 1.30             | 0.12          | 0.07            | 3.20             | 0.08           | 0.91              | 0.21            | 13.00           | 13.46            | 0.72           | 13.48           |
| 38               | 5.24                  | 1.23             | 0.18          | 0.05            | 3.99             | 0.11           | 1.55              | 0.18            | 14.72           | 15.32            | 1.48           | 15.39           |
| 41               | 5.45                  | 1.57             | 0.22          | 0.04            | 6.24             | 0.10           | 1.98              | 0.20            | 16.01           | 17.26            | 1.93           | 17.37           |

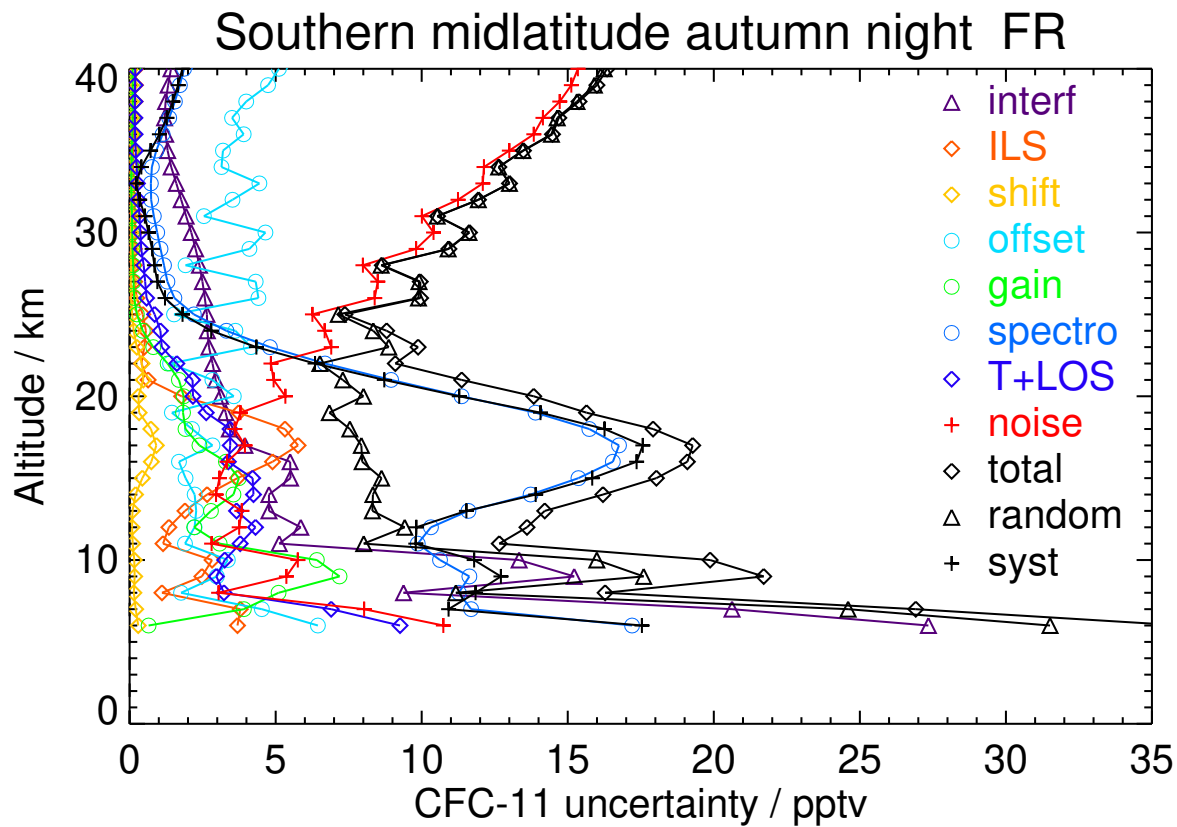

**Figure S26.** V8H\_F-11\_61 Southern midlatitude autumn night

Table S28. CFC-11 error budget for Southern polar winter day. All uncertainties are  $1\sigma$ .

| altitude<br>(km) | mean target<br>(pptv) | interf<br>(pptv) | ILS<br>(pptv) | shift<br>(pptv) | offset<br>(pptv) | gain<br>(pptv) | spectro<br>(pptv) | T+LOS<br>(pptv) | noise<br>(pptv) | random<br>(pptv) | syst<br>(pptv) | total<br>(pptv) |
|------------------|-----------------------|------------------|---------------|-----------------|------------------|----------------|-------------------|-----------------|-----------------|------------------|----------------|-----------------|
| 5                | 284.88                | 13.71            | 2.89          | 0.38            | 4.94             | 0.12           | 12.89             | 8.90            | 9.86            | 19.72            | 13.21          | 23.74           |
| 8                | 253.50                | 9.85             | 1.34          | 0.10            | 3.54             | 4.16           | 12.39             | 5.42            | 6.46            | 14.13            | 12.39          | 18.80           |
| 11               | 225.56                | 7.14             | 3.33          | 0.21            | 2.25             | 3.34           | 18.23             | 4.78            | 4.13            | 10.59            | 18.39          | 21.22           |
| 14               | 139.32                | 4.41             | 5.29          | 0.30            | 1.91             | 1.87           | 22.59             | 6.53            | 3.79            | 9.74             | 22.96          | 24.94           |
| 17               | 23.77                 | 4.07             | 2.51          | 0.23            | 1.54             | 0.90           | 9.28              | 3.20            | 4.68            | 7.92             | 9.04           | 12.02           |
| 20               | 1.77                  | 3.07             | 0.76          | 0.10            | 2.10             | 0.20           | 2.78              | 1.00            | 6.88            | 8.39             | 0.22           | 8.40            |
| 23               | -3.00                 | 2.86             | 0.23          | 0.06            | 3.03             | 0.05           | 0.94              | 0.38            | 9.36            | 10.29            | 0.41           | 10.30           |
| 26               | 0.82                  | 2.68             | 0.13          | 0.05            | 3.19             | 0.08           | 1.07              | 0.29            | 11.41           | 12.18            | 0.75           | 12.20           |
| 29               | 5.52                  | 2.33             | 0.20          | 0.06            | 3.21             | 0.08           | 0.88              | 0.28            | 12.81           | 13.44            | 0.44           | 13.44           |
| 32               | 3.99                  | 1.83             | 0.22          | 0.08            | 3.57             | 0.07           | 0.77              | 0.25            | 14.43           | 15.00            | 0.25           | 15.00           |
| 35               | 1.78                  | 1.65             | 0.23          | 0.07            | 4.60             | 0.07           | 0.85              | 0.23            | 16.06           | 16.81            | 0.39           | 16.82           |
| 38               | 1.82                  | 1.86             | 0.24          | 0.07            | 6.55             | 0.09           | 1.17              | 0.23            | 17.28           | 18.59            | 0.91           | 18.61           |
| 41               | -1.32                 | 2.25             | 0.18          | 0.06            | 9.99             | 0.12           | 1.55              | 0.24            | 18.30           | 20.98            | 1.45           | 21.03           |

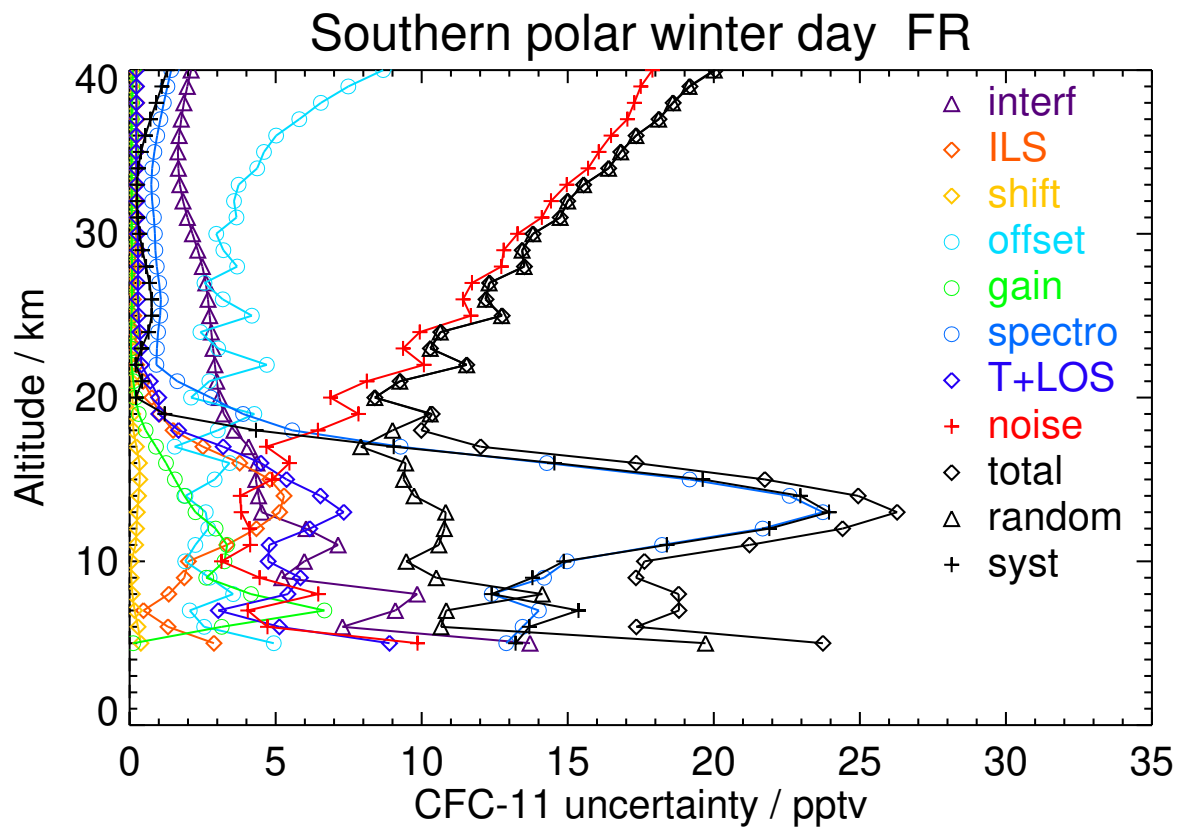

Figure S27. V8H\_F-11\_61 Southern polar winter day

Table S29. CFC-11 error budget for Southern polar winter night. All uncertainties are  $1\sigma$ .

| altitude<br>(km) | mean target<br>(pptv) | interf<br>(pptv) | ILS<br>(pptv) | shift<br>(pptv) | offset<br>(pptv) | gain<br>(pptv) | spectro<br>(pptv) | T+LOS<br>(pptv) | noise<br>(pptv) | random<br>(pptv) | syst<br>(pptv) | total<br>(pptv) |
|------------------|-----------------------|------------------|---------------|-----------------|------------------|----------------|-------------------|-----------------|-----------------|------------------|----------------|-----------------|
| 5                | 281.74                | 17.52            | 2.35          | 0.21            | 4.55             | 2.32           | 16.94             | 8.05            | 8.40            | 21.99            | 16.66          | 27.59           |
| 8                | 241.98                | 9.70             | 1.25          | 0.10            | 3.08             | 4.72           | 9.24              | 3.89            | 5.33            | 12.90            | 9.49           | 16.01           |
| 11               | 243.37                | 5.50             | 1.56          | 0.09            | 2.42             | 3.55           | 13.32             | 4.46            | 4.17            | 8.92             | 13.65          | 16.31           |
| 14               | 146.59                | 4.57             | 4.33          | 0.31            | 2.03             | 3.18           | 19.33             | 5.49            | 3.92            | 9.41             | 19.61          | 21.76           |
| 17               | 36.82                 | 3.69             | 2.61          | 0.17            | 1.88             | 1.03           | 9.20              | 3.10            | 4.74            | 7.66             | 9.12           | 11.91           |
| 20               | 1.20                  | 2.95             | 0.74          | 0.07            | 2.30             | 0.23           | 2.89              | 1.15            | 6.70            | 8.18             | 1.47           | 8.31            |
| 23               | -2.57                 | 2.81             | 0.37          | 0.07            | 3.03             | 0.10           | 1.07              | 0.48            | 9.16            | 10.12            | 0.36           | 10.12           |
| 26               | 3.41                  | 2.68             | 0.14          | 0.05            | 3.48             | 0.05           | 1.30              | 0.35            | 11.57           | 12.41            | 1.06           | 12.45           |
| 29               | 0.35                  | 2.35             | 0.29          | 0.05            | 3.53             | 0.08           | 1.23              | 0.36            | 13.31           | 14.01            | 0.83           | 14.03           |
| 32               | 3.31                  | 1.79             | 0.27          | 0.06            | 3.82             | 0.09           | 0.74              | 0.26            | 14.90           | 15.50            | 0.33           | 15.51           |
| 35               | 5.88                  | 1.49             | 0.27          | 0.06            | 5.04             | 0.09           | 1.01              | 0.24            | 16.50           | 17.33            | 0.64           | 17.35           |
| 38               | 3.30                  | 1.61             | 0.29          | 0.07            | 7.22             | 0.07           | 1.27              | 0.27            | 17.69           | 19.20            | 0.92           | 19.22           |
| 41               | -0.20                 | 2.07             | 0.33          | 0.08            | 11.05            | 0.14           | 1.63              | 0.31            | 18.91           | 22.02            | 1.39           | 22.06           |

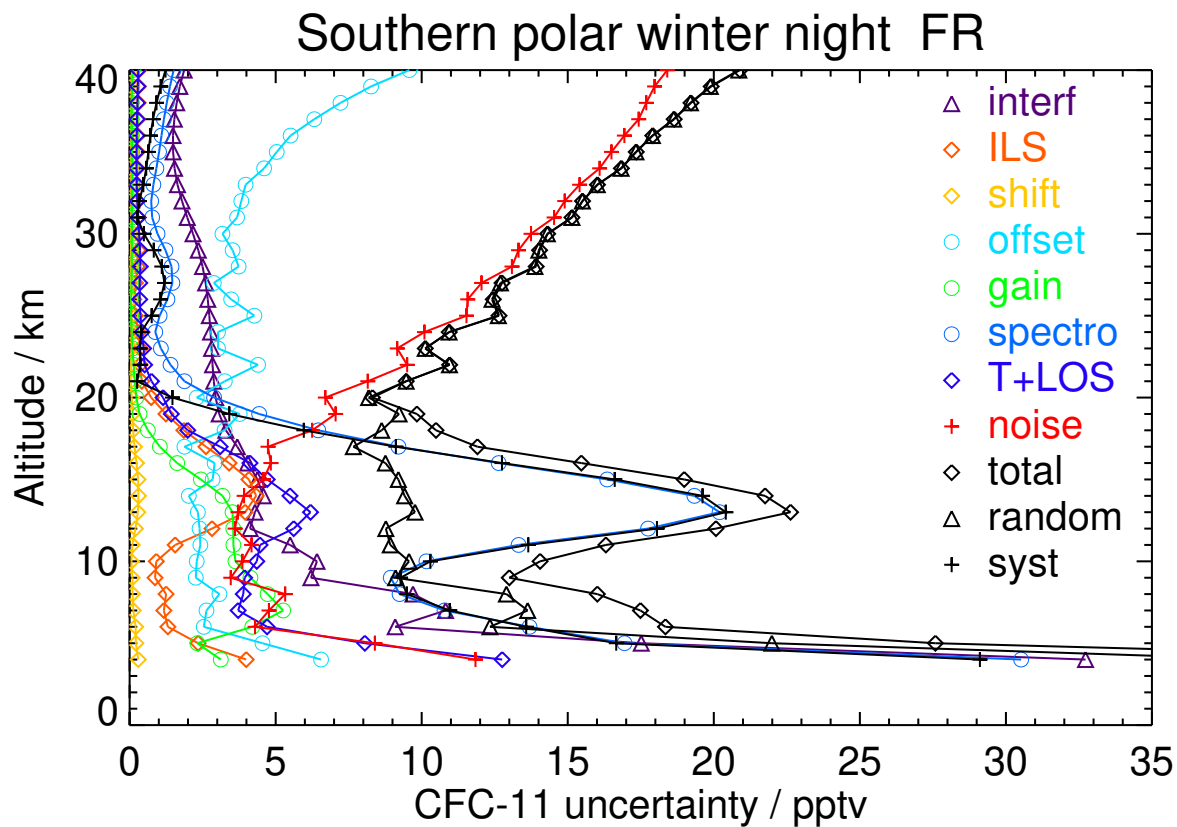

Figure S28. V8H\_F-11\_61 Southern polar winter night

**Table S30.** CFC-11 error budget for Southern polar spring day. All uncertainties are  $1\sigma$ .

| altitude<br>(km) | mean target<br>(pptv) | interf<br>(pptv) | ILS<br>(pptv) | shift<br>(pptv) | offset<br>(pptv) | gain<br>(pptv) | spectro<br>(pptv) | T+LOS<br>(pptv) | noise<br>(pptv) | random<br>(pptv) | syst<br>(pptv) | total<br>(pptv) |
|------------------|-----------------------|------------------|---------------|-----------------|------------------|----------------|-------------------|-----------------|-----------------|------------------|----------------|-----------------|
| 8                | 246.56                | 9.10             | 1.71          | 0.19            | 2.11             | 4.76           | 13.72             | 3.35            | 3.58            | 11.63            | 13.77          | 18.03           |
| 11               | 242.38                | 4.50             | 5.09          | 0.48            | 2.31             | 1.38           | 15.32             | 6.76            | 3.66            | 10.18            | 15.62          | 18.64           |
| 14               | 130.52                | 6.32             | 15.50         | 0.81            | 2.76             | 0.81           | 24.37             | 6.87            | 3.99            | 11.20            | 28.65          | 30.76           |
| 17               | -0.48                 | 4.75             | 4.13          | 0.47            | 3.37             | 0.31           | 4.50              | 2.15            | 5.20            | 8.36             | 5.78           | 10.16           |
| 20               | -0.42                 | 3.38             | 1.08          | 0.14            | 3.96             | 0.12           | 1.61              | 0.71            | 6.39            | 8.33             | 1.72           | 8.50            |
| 23               | 6.50                  | 3.01             | 0.34          | 0.07            | 4.33             | 0.09           | 0.82              | 0.49            | 7.39            | 9.13             | 0.29           | 9.13            |
| 26               | 6.68                  | 3.17             | 0.50          | 0.17            | 4.52             | 0.08           | 1.35              | 0.54            | 8.38            | 10.09            | 1.18           | 10.15           |
| 29               | 3.01                  | 3.14             | 0.57          | 0.09            | 4.58             | 0.10           | 0.75              | 0.39            | 9.40            | 10.96            | 0.50           | 10.97           |
| 32               | 2.43                  | 2.61             | 0.33          | 0.09            | 4.55             | 0.08           | 0.81              | 0.25            | 10.55           | 11.80            | 0.73           | 11.82           |
| 35               | 1.27                  | 2.09             | 0.19          | 0.13            | 4.42             | 0.13           | 0.82              | 0.22            | 11.79           | 12.77            | 0.73           | 12.80           |
| 38               | -1.17                 | 1.87             | 0.13          | 0.12            | 4.07             | 0.17           | 0.93              | 0.20            | 13.43           | 14.17            | 0.88           | 14.19           |
| 41               | -1.66                 | 1.77             | 0.13          | 0.09            | 4.44             | 0.24           | 1.06              | 0.22            | 14.81           | 15.57            | 1.02           | 15.60           |

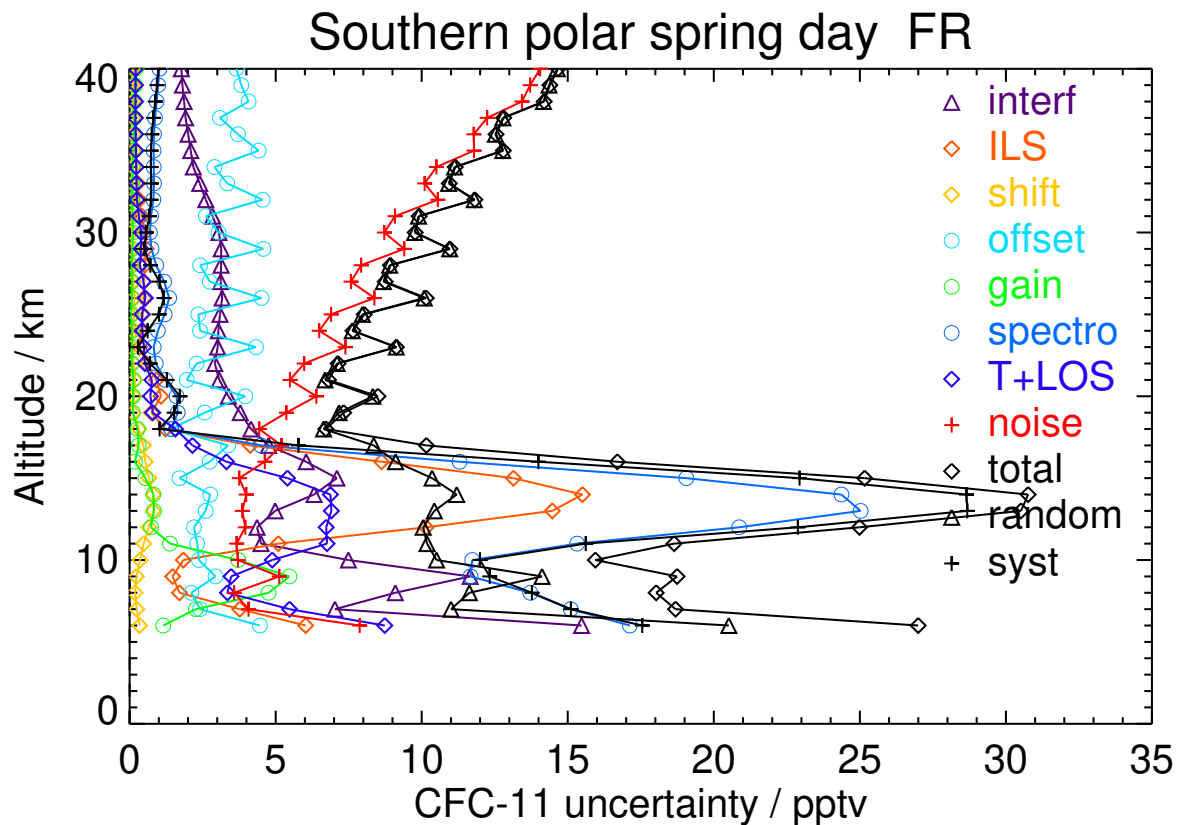

**Figure S29.** V8H\_F-11\_61 Southern polar spring day

**Table S31.** CFC-11 error budget for Southern polar spring night. All uncertainties are  $1\sigma$ .

| altitude<br>(km) | mean target<br>(pptv) | interf<br>(pptv) | ILS<br>(pptv) | shift<br>(pptv) | offset<br>(pptv) | gain<br>(pptv) | spectro<br>(pptv) | T+LOS<br>(pptv) | noise<br>(pptv) | random<br>(pptv) | syst<br>(pptv) | total<br>(pptv) |
|------------------|-----------------------|------------------|---------------|-----------------|------------------|----------------|-------------------|-----------------|-----------------|------------------|----------------|-----------------|
| 8                | 242.62                | 10.90            | 1.61          | 0.29            | 2.35             | 5.94           | 10.15             | 3.18            | 4.09            | 12.90            | 11.21          | 17.09           |
| 11               | 241.14                | 5.00             | 3.61          | 0.29            | 2.21             | 2.38           | 14.30             | 5.74            | 3.59            | 9.88             | 14.19          | 17.29           |
| 14               | 135.29                | 5.87             | 11.26         | 0.52            | 2.21             | 2.33           | 20.90             | 6.09            | 3.42            | 12.07            | 22.62          | 25.64           |
| 17               | 25.92                 | 4.14             | 4.20          | 0.68            | 2.64             | 0.69           | 6.31              | 2.59            | 4.37            | 8.03             | 6.61           | 10.40           |
| 20               | 11.47                 | 3.28             | 1.45          | 0.25            | 3.49             | 0.48           | 2.59              | 0.85            | 5.92            | 8.21             | 0.59           | 8.23            |
| 23               | 10.12                 | 2.93             | 0.34          | 0.12            | 4.25             | 0.26           | 1.56              | 0.45            | 7.36            | 9.14             | 0.52           | 9.15            |
| 26               | 7.68                  | 2.88             | 0.27          | 0.11            | 4.62             | 0.16           | 1.08              | 0.42            | 8.59            | 10.23            | 0.64           | 10.24           |
| 29               | 9.62                  | 2.94             | 0.43          | 0.11            | 4.66             | 0.15           | 0.97              | 0.39            | 9.78            | 11.26            | 0.67           | 11.28           |
| 32               | 3.22                  | 2.40             | 0.47          | 0.14            | 4.52             | 0.16           | 0.71              | 0.30            | 10.88           | 12.06            | 0.43           | 12.06           |
| 35               | 3.92                  | 2.13             | 0.18          | 0.12            | 4.36             | 0.16           | 0.89              | 0.20            | 12.11           | 13.06            | 0.75           | 13.08           |
| 38               | 4.12                  | 1.98             | 0.17          | 0.11            | 4.07             | 0.19           | 1.14              | 0.21            | 13.79           | 14.53            | 1.03           | 14.56           |
| 41               | 0.33                  | 1.84             | 0.17          | 0.09            | 4.86             | 0.24           | 1.21              | 0.21            | 14.99           | 15.88            | 1.15           | 15.92           |

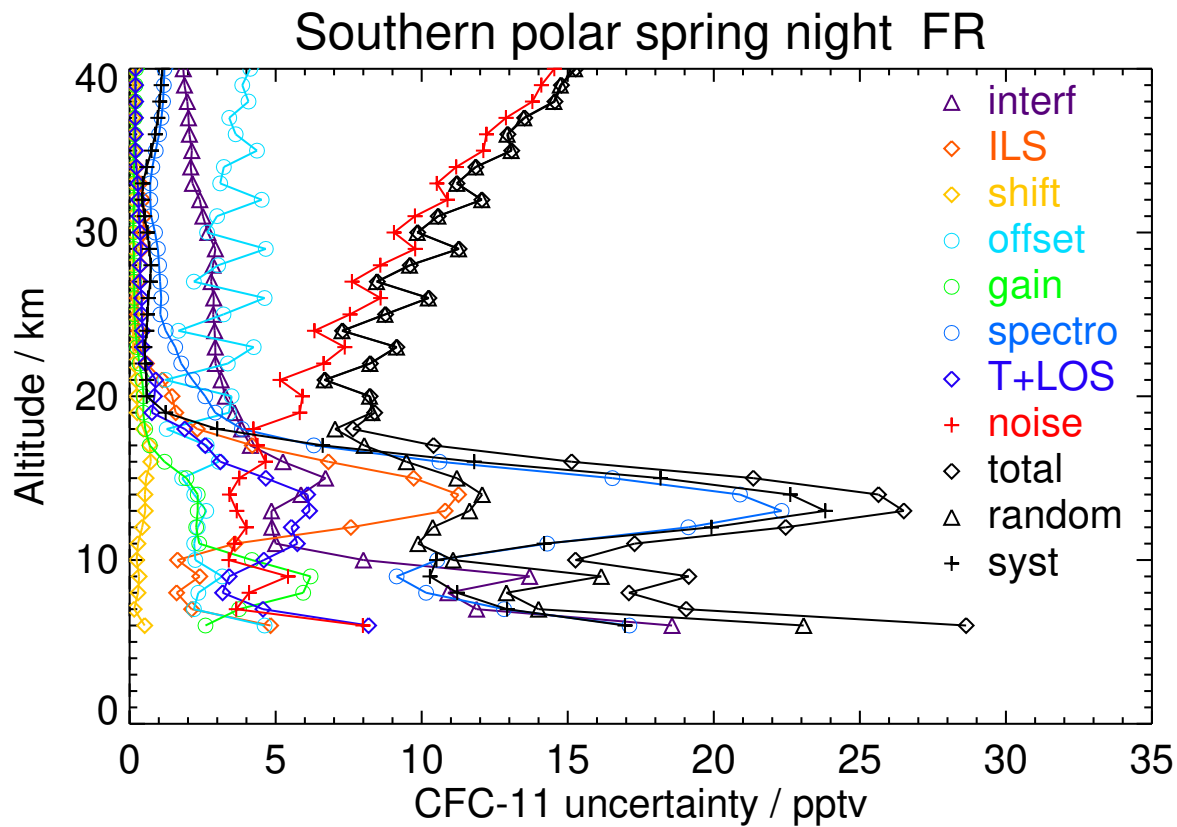

**Figure S30.** V8H\_F-11\_61 Southern polar spring night



**Table S32.** CFC-11 error budget for Southern polar summer day. All uncertainties are  $1\sigma$ .

| altitude<br>(km) | mean target<br>(pptv) | interf<br>(pptv) | ILS<br>(pptv) | shift<br>(pptv) | offset<br>(pptv) | gain<br>(pptv) | spectro<br>(pptv) | T+LOS<br>(pptv) | noise<br>(pptv) | random<br>(pptv) | syst<br>(pptv) | total<br>(pptv) |
|------------------|-----------------------|------------------|---------------|-----------------|------------------|----------------|-------------------|-----------------|-----------------|------------------|----------------|-----------------|
| 5                | 266.57                | 25.82            | 1.16          | 0.17            | 5.69             | 3.59           | 9.46              | 7.49            | 10.11           | 29.89            | 8.22           | 31.00           |
| 8                | 244.98                | 14.46            | 1.67          | 0.26            | 3.15             | 8.43           | 12.79             | 3.57            | 5.87            | 17.28            | 14.32          | 22.44           |
| 11               | 220.97                | 4.61             | 0.45          | 0.06            | 1.98             | 2.35           | 11.12             | 4.04            | 3.72            | 8.08             | 10.93          | 13.59           |
| 14               | 188.58                | 5.29             | 2.33          | 0.09            | 1.41             | 3.41           | 11.03             | 3.28            | 2.89            | 7.28             | 11.62          | 13.71           |
| 17               | 134.51                | 3.67             | 5.28          | 0.35            | 1.17             | 1.87           | 12.17             | 3.19            | 2.88            | 6.07             | 13.27          | 14.59           |
| 20               | 52.61                 | 2.96             | 3.57          | 0.36            | 1.35             | 1.24           | 8.01              | 2.10            | 3.64            | 5.62             | 8.67           | 10.33           |
| 23               | 15.41                 | 2.82             | 0.58          | 0.33            | 1.90             | 0.33           | 1.90              | 0.92            | 4.96            | 6.16             | 1.79           | 6.42            |
| 26               | 3.63                  | 2.58             | 0.19          | 0.07            | 2.63             | 0.15           | 0.90              | 0.49            | 6.66            | 7.66             | 0.55           | 7.68            |
| 29               | 5.65                  | 2.33             | 0.15          | 0.06            | 3.29             | 0.09           | 0.81              | 0.37            | 8.34            | 9.30             | 0.42           | 9.31            |
| 32               | 2.69                  | 2.10             | 0.30          | 0.08            | 3.68             | 0.07           | 0.57              | 0.31            | 10.09           | 10.96            | 0.41           | 10.97           |
| 35               | 4.25                  | 1.81             | 0.11          | 0.13            | 3.74             | 0.06           | 0.57              | 0.22            | 11.68           | 12.40            | 0.39           | 12.41           |
| 38               | 2.52                  | 1.63             | 0.12          | 0.14            | 3.39             | 0.14           | 1.14              | 0.18            | 13.31           | 13.84            | 1.07           | 13.88           |
| 41               | 3.63                  | 2.15             | 0.15          | 0.12            | 3.79             | 0.14           | 1.52              | 0.20            | 14.43           | 15.08            | 1.48           | 15.15           |

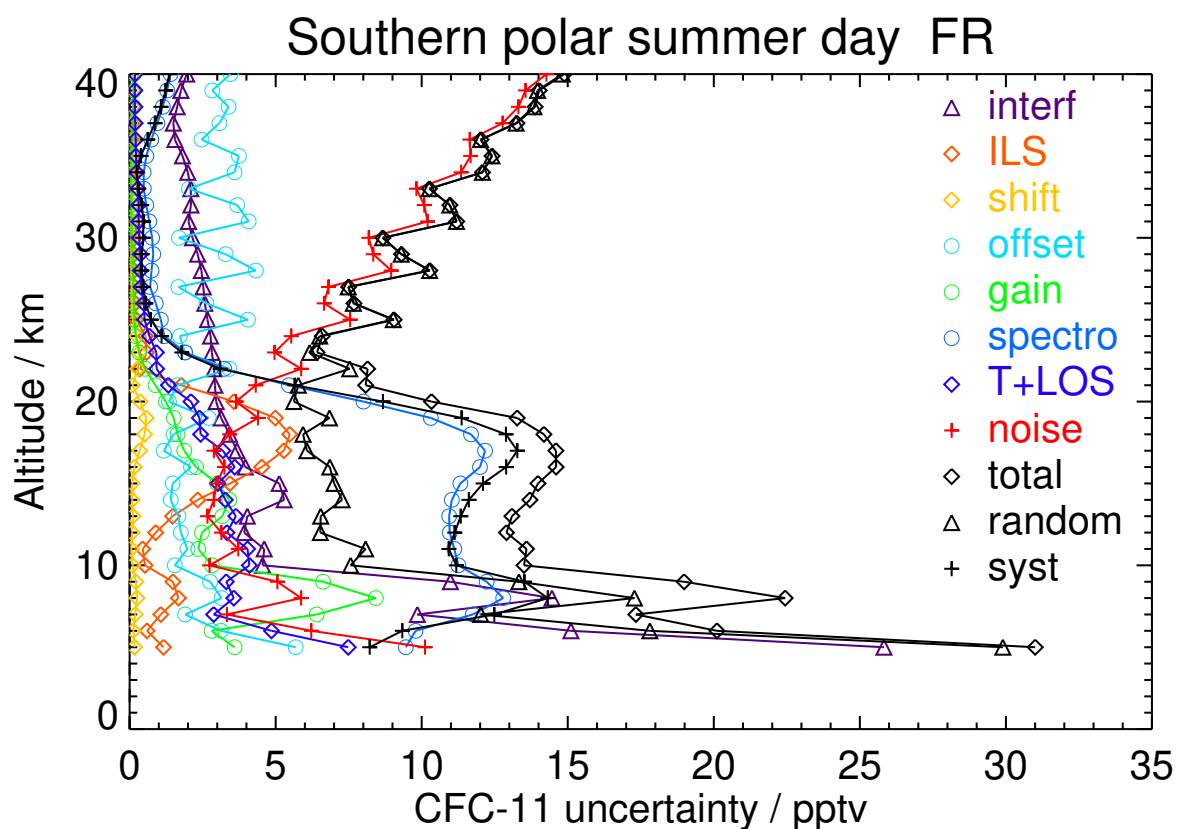**Figure S31.** V8H\_F-11\_61 Southern polar summer day

Table S33. CFC-11 error budget for Southern polar summer night. All uncertainties are  $1\sigma$ .

| altitude<br>(km) | mean target<br>(pptv) | interf<br>(pptv) | ILS<br>(pptv) | shift<br>(pptv) | offset<br>(pptv) | gain<br>(pptv) | spectro<br>(pptv) | T+LOS<br>(pptv) | noise<br>(pptv) | random<br>(pptv) | syst<br>(pptv) | total<br>(pptv) |
|------------------|-----------------------|------------------|---------------|-----------------|------------------|----------------|-------------------|-----------------|-----------------|------------------|----------------|-----------------|
| 5                | 282.19                | 19.84            | 0.95          | 0.20            | 4.27             | 0.30           | 10.74             | 7.66            | 9.23            | 23.57            | 10.79          | 25.92           |
| 8                | 250.63                | 15.58            | 0.76          | 0.18            | 3.12             | 2.03           | 10.13             | 4.25            | 6.29            | 18.01            | 9.66           | 20.43           |
| 11               | 225.43                | 9.80             | 0.51          | 0.06            | 2.07             | 4.74           | 10.72             | 2.67            | 4.06            | 11.31            | 11.56          | 16.18           |
| 14               | 206.43                | 4.26             | 2.68          | 0.12            | 1.59             | 2.54           | 12.13             | 3.08            | 3.19            | 6.58             | 12.56          | 14.18           |
| 17               | 139.85                | 4.54             | 5.65          | 0.68            | 1.36             | 2.96           | 13.75             | 2.85            | 3.27            | 6.75             | 15.03          | 16.47           |
| 20               | 57.11                 | 2.98             | 2.77          | 0.28            | 1.37             | 1.16           | 8.30              | 1.82            | 4.08            | 5.75             | 8.70           | 10.43           |
| 23               | 15.29                 | 2.82             | 0.45          | 0.31            | 1.44             | 0.53           | 2.22              | 0.91            | 5.27            | 6.28             | 2.16           | 6.64            |
| 26               | 6.91                  | 2.62             | 0.17          | 0.06            | 1.54             | 0.11           | 0.98              | 0.52            | 6.74            | 7.44             | 0.77           | 7.48            |
| 29               | 5.07                  | 2.28             | 0.11          | 0.05            | 1.93             | 0.06           | 0.80              | 0.36            | 8.43            | 8.97             | 0.52           | 8.99            |
| 32               | 4.56                  | 1.65             | 0.22          | 0.07            | 2.46             | 0.08           | 0.72              | 0.31            | 10.25           | 10.69            | 0.44           | 10.70           |
| 35               | -0.63                 | 1.51             | 0.11          | 0.10            | 2.92             | 0.07           | 0.73              | 0.21            | 12.25           | 12.69            | 0.53           | 12.71           |
| 38               | 1.48                  | 1.37             | 0.18          | 0.09            | 3.10             | 0.09           | 1.35              | 0.18            | 14.17           | 14.58            | 1.27           | 14.63           |
| 41               | 4.47                  | 1.46             | 0.23          | 0.07            | 4.09             | 0.13           | 1.75              | 0.19            | 15.17           | 15.79            | 1.71           | 15.88           |

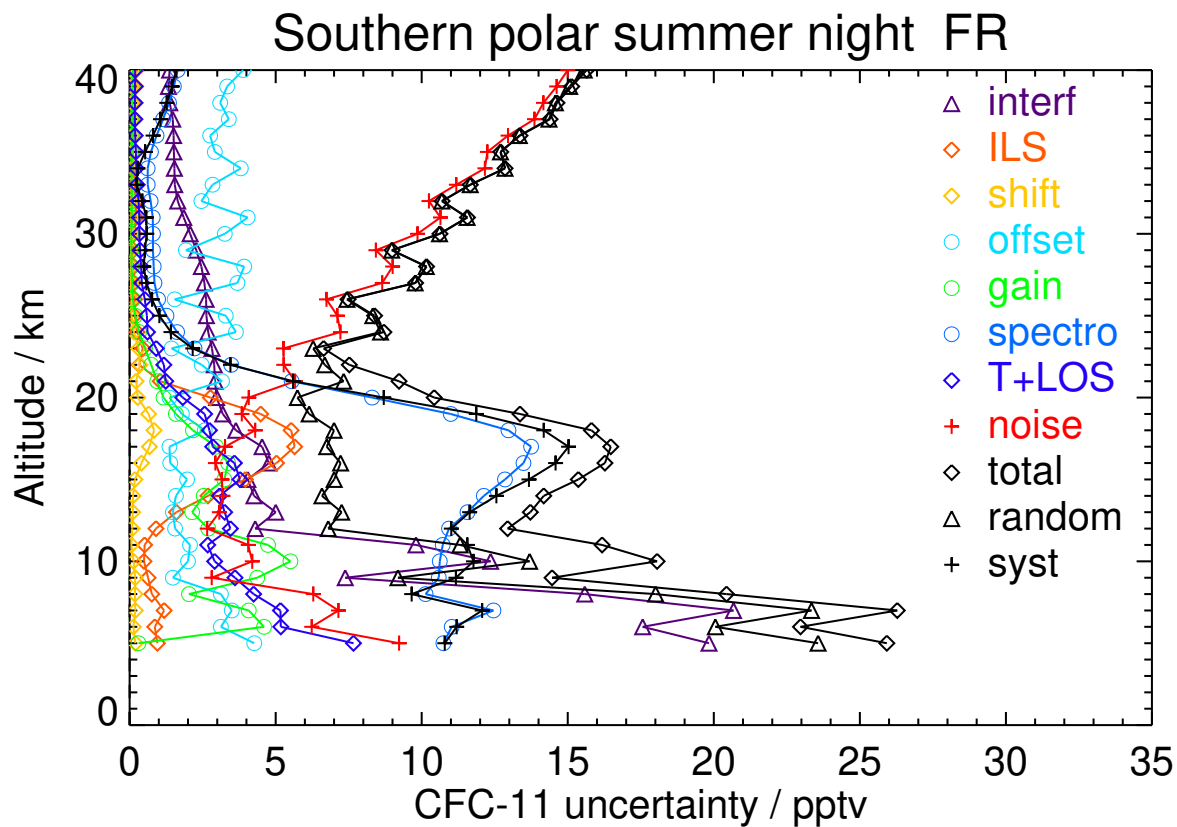

Figure S32. V8H\_F-11\_61 Southern polar summer night

**Table S34.** CFC-11 error budget for Southern polar autumn day. All uncertainties are  $1\sigma$ .

| altitude<br>(km) | mean target<br>(pptv) | interf<br>(pptv) | ILS<br>(pptv) | shift<br>(pptv) | offset<br>(pptv) | gain<br>(pptv) | spectro<br>(pptv) | T+LOS<br>(pptv) | noise<br>(pptv) | random<br>(pptv) | syst<br>(pptv) | total<br>(pptv) |
|------------------|-----------------------|------------------|---------------|-----------------|------------------|----------------|-------------------|-----------------|-----------------|------------------|----------------|-----------------|
| 5                | 267.01                | 13.95            | 1.01          | 0.20            | 3.42             | 3.72           | 15.51             | 6.57            | 5.60            | 16.90            | 15.84          | 23.16           |
| 8                | 248.87                | 7.89             | 1.20          | 0.26            | 2.06             | 4.94           | 14.43             | 4.61            | 3.33            | 10.66            | 14.81          | 18.25           |
| 11               | 223.82                | 5.17             | 0.54          | 0.11            | 1.87             | 2.66           | 9.65              | 3.17            | 2.78            | 7.31             | 9.74           | 12.18           |
| 14               | 193.32                | 4.25             | 3.25          | 0.33            | 2.22             | 3.69           | 14.89             | 3.88            | 2.98            | 7.08             | 15.58          | 17.11           |
| 17               | 94.82                 | 3.83             | 4.43          | 0.54            | 2.84             | 2.31           | 13.45             | 2.66            | 4.04            | 7.19             | 14.16          | 15.89           |
| 20               | 24.66                 | 3.19             | 0.85          | 0.07            | 3.55             | 0.86           | 5.41              | 1.16            | 5.61            | 7.70             | 5.18           | 9.28            |
| 23               | 4.63                  | 2.74             | 0.39          | 0.05            | 4.03             | 0.19           | 1.26              | 0.59            | 7.38            | 8.92             | 0.89           | 8.96            |
| 26               | 10.21                 | 2.59             | 0.16          | 0.04            | 3.93             | 0.11           | 1.28              | 0.47            | 9.09            | 10.28            | 1.01           | 10.33           |
| 29               | 5.71                  | 2.24             | 0.11          | 0.05            | 3.48             | 0.10           | 1.40              | 0.42            | 10.78           | 11.58            | 1.24           | 11.64           |
| 32               | 2.24                  | 1.65             | 0.15          | 0.04            | 3.32             | 0.08           | 0.85              | 0.33            | 12.60           | 13.16            | 0.44           | 13.17           |
| 35               | 1.16                  | 1.22             | 0.12          | 0.04            | 3.79             | 0.09           | 1.05              | 0.23            | 14.71           | 15.25            | 0.90           | 15.28           |
| 38               | 2.94                  | 1.14             | 0.23          | 0.05            | 5.35             | 0.10           | 1.84              | 0.22            | 16.28           | 17.19            | 1.76           | 17.28           |
| 41               | 3.11                  | 1.36             | 0.29          | 0.05            | 8.72             | 0.07           | 2.35              | 0.25            | 17.76           | 19.84            | 2.28           | 19.97           |

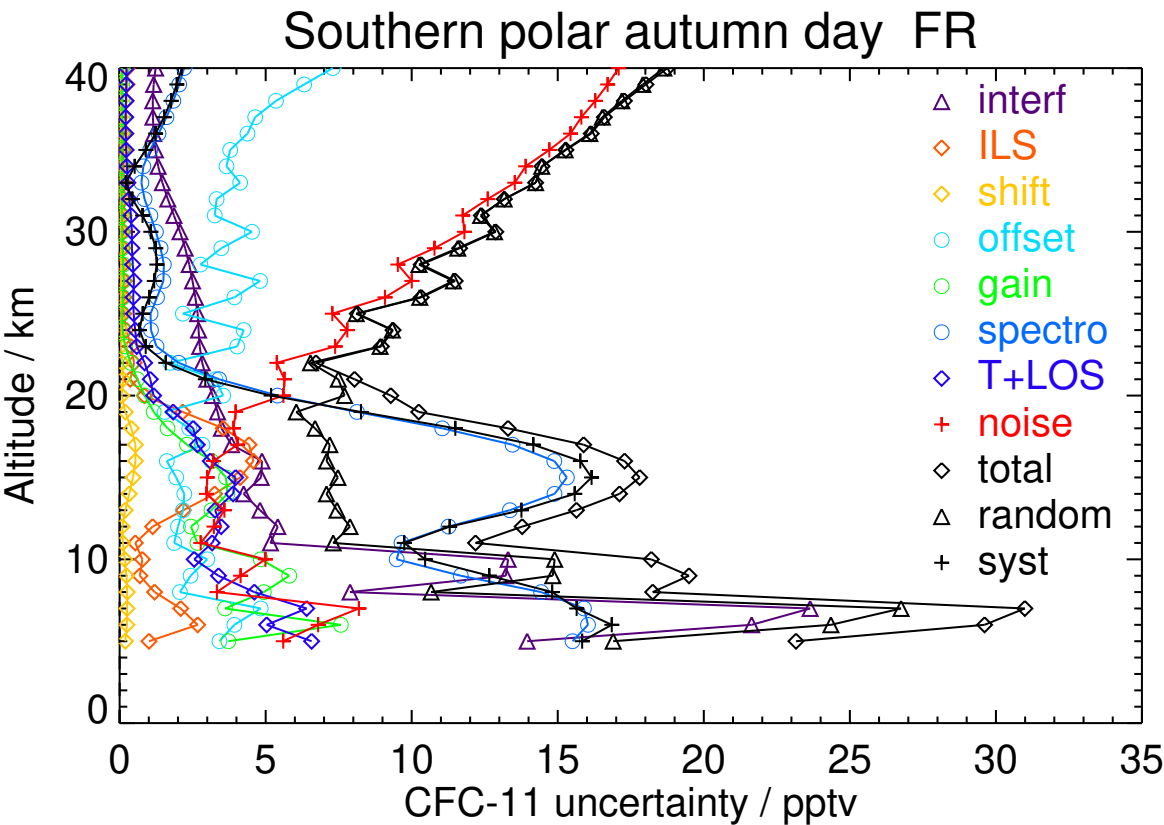

**Figure S33.** V8H\_F-11\_61 Southern polar autumn day

**Table S35.** CFC-11 error budget for Southern polar autumn night. All uncertainties are  $1\sigma$ .

| altitude<br>(km) | mean target<br>(pptv) | interf<br>(pptv) | ILS<br>(pptv) | shift<br>(pptv) | offset<br>(pptv) | gain<br>(pptv) | spectro<br>(pptv) | T+LOS<br>(pptv) | noise<br>(pptv) | random<br>(pptv) | syst<br>(pptv) | total<br>(pptv) |
|------------------|-----------------------|------------------|---------------|-----------------|------------------|----------------|-------------------|-----------------|-----------------|------------------|----------------|-----------------|
| 5                | 267.96                | 13.13            | 1.47          | 0.21            | 3.35             | 4.28           | 14.92             | 6.19            | 5.58            | 16.28            | 15.20          | 22.28           |
| 8                | 244.55                | 10.30            | 1.38          | 0.22            | 2.70             | 4.39           | 11.61             | 3.77            | 4.32            | 12.87            | 11.69          | 17.39           |
| 11               | 227.73                | 6.17             | 0.62          | 0.07            | 2.13             | 3.14           | 10.38             | 3.18            | 3.28            | 8.18             | 10.71          | 13.47           |
| 14               | 192.39                | 4.60             | 2.58          | 0.35            | 2.14             | 3.67           | 13.84             | 3.55            | 3.22            | 7.36             | 14.36          | 16.14           |
| 17               | 100.04                | 3.96             | 4.38          | 0.52            | 2.44             | 2.30           | 13.73             | 2.78            | 4.02            | 7.22             | 14.38          | 16.09           |
| 20               | 22.25                 | 3.14             | 1.29          | 0.10            | 2.73             | 0.83           | 5.72              | 1.39            | 5.41            | 7.17             | 5.68           | 9.14            |
| 23               | 7.86                  | 2.78             | 0.54          | 0.06            | 2.82             | 0.16           | 1.05              | 0.62            | 7.05            | 8.16             | 0.73           | 8.20            |
| 26               | 12.62                 | 2.60             | 0.15          | 0.05            | 2.80             | 0.16           | 1.64              | 0.47            | 8.90            | 9.73             | 1.40           | 9.83            |
| 29               | 7.16                  | 2.22             | 0.16          | 0.05            | 2.92             | 0.15           | 1.90              | 0.49            | 11.00           | 11.65            | 1.63           | 11.76           |
| 32               | -1.23                 | 1.66             | 0.17          | 0.04            | 3.28             | 0.08           | 0.91              | 0.37            | 13.21           | 13.74            | 0.55           | 13.75           |
| 35               | -2.94                 | 1.26             | 0.11          | 0.04            | 4.22             | 0.07           | 1.00              | 0.23            | 15.38           | 16.01            | 0.83           | 16.03           |
| 38               | -1.56                 | 1.16             | 0.21          | 0.05            | 6.23             | 0.07           | 1.83              | 0.24            | 16.99           | 18.15            | 1.73           | 18.23           |
| 41               | -1.10                 | 1.30             | 0.30          | 0.06            | 10.11            | 0.09           | 2.39              | 0.27            | 18.55           | 21.18            | 2.33           | 21.31           |

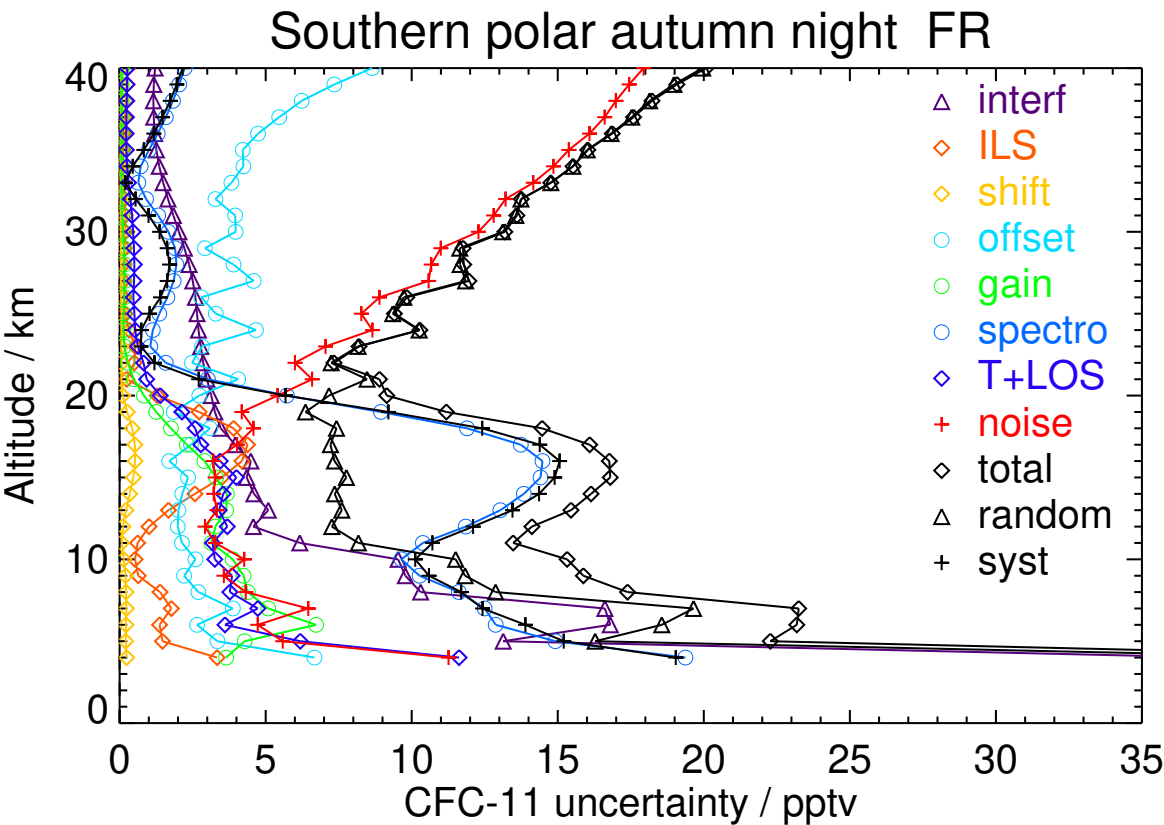

**Figure S34.** V8H\_F-11\_61 Southern polar autumn night

**Table S36.** CFC-11 error budget for Northern polar winter day. All uncertainties are  $1\sigma$ .

| altitude<br>(km) | mean target<br>(pptv) | interf<br>(pptv) | ILS<br>(pptv) | shift<br>(pptv) | offset<br>(pptv) | gain<br>(pptv) | spectro<br>(pptv) | T+LOS<br>(pptv) | noise<br>(pptv) | random<br>(pptv) | syst<br>(pptv) | total<br>(pptv) |
|------------------|-----------------------|------------------|---------------|-----------------|------------------|----------------|-------------------|-----------------|-----------------|------------------|----------------|-----------------|
| 8                | 251.10                | 3.52             | 2.55          | 0.26            | 1.74             | 3.34           | 12.46             | 6.41            | 5.42            | 10.07            | 12.54          | 16.09           |
| 11               | 214.22                | 3.60             | 4.64          | 0.28            | 1.14             | 2.88           | 14.26             | 4.29            | 4.50            | 8.35             | 14.71          | 16.91           |
| 14               | 147.28                | 4.95             | 6.64          | 0.32            | 1.61             | 2.57           | 13.86             | 3.62            | 4.62            | 9.56             | 14.59          | 17.45           |
| 17               | 83.50                 | 3.79             | 2.74          | 0.10            | 1.66             | 1.92           | 9.09              | 2.42            | 5.32            | 9.09             | 7.90           | 12.04           |
| 20               | 48.75                 | 2.87             | 1.41          | 0.12            | 0.59             | 1.18           | 5.74              | 1.50            | 5.80            | 7.89             | 4.30           | 8.99            |
| 23               | 23.04                 | 2.59             | 0.22          | 0.03            | 1.44             | 0.36           | 1.99              | 0.52            | 6.92            | 7.63             | 1.69           | 7.82            |
| 26               | 15.72                 | 2.53             | 0.30          | 0.02            | 1.54             | 0.15           | 1.20              | 0.35            | 7.88            | 8.48             | 0.72           | 8.51            |
| 29               | 14.99                 | 2.15             | 0.24          | 0.05            | 1.69             | 0.15           | 1.37              | 0.26            | 9.42            | 9.87             | 0.80           | 9.91            |
| 32               | 14.66                 | 1.65             | 0.29          | 0.08            | 2.38             | 0.21           | 1.19              | 0.25            | 11.16           | 11.57            | 0.77           | 11.60           |
| 35               | 9.87                  | 1.45             | 0.17          | 0.05            | 3.01             | 0.18           | 1.09              | 0.19            | 13.77           | 14.21            | 0.59           | 14.22           |
| 38               | 4.77                  | 1.42             | 0.15          | 0.03            | 3.85             | 0.13           | 1.65              | 0.17            | 15.89           | 16.43            | 1.43           | 16.50           |
| 41               | 1.40                  | 1.58             | 0.19          | 0.03            | 6.94             | 0.11           | 2.00              | 0.17            | 18.31           | 19.66            | 1.87           | 19.75           |

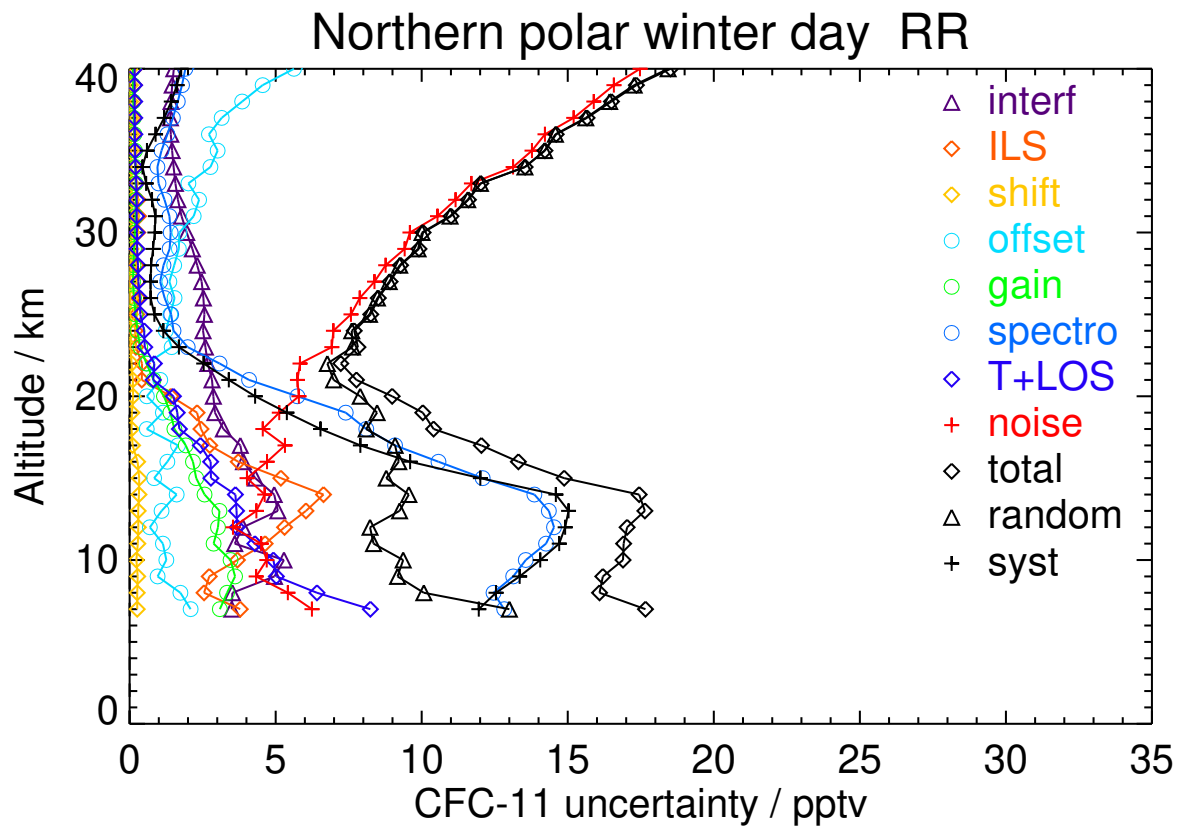

**Figure S35.** V8R\_F-11\_261 Northern polar winter day

**Table S37.** CFC-11 error budget for Northern polar winter night. All uncertainties are  $1\sigma$ .

| altitude<br>(km) | mean target<br>(pptv) | interf<br>(pptv) | ILS<br>(pptv) | shift<br>(pptv) | offset<br>(pptv) | gain<br>(pptv) | spectro<br>(pptv) | T+LOS<br>(pptv) | noise<br>(pptv) | random<br>(pptv) | syst<br>(pptv) | total<br>(pptv) |
|------------------|-----------------------|------------------|---------------|-----------------|------------------|----------------|-------------------|-----------------|-----------------|------------------|----------------|-----------------|
| 8                | 248.09                | 3.71             | 2.01          | 0.18            | 2.07             | 3.04           | 11.22             | 6.76            | 5.87            | 10.26            | 11.49          | 15.41           |
| 11               | 228.26                | 3.81             | 4.64          | 0.19            | 1.09             | 2.91           | 14.25             | 4.74            | 4.72            | 8.48             | 14.88          | 17.13           |
| 14               | 159.98                | 5.09             | 6.65          | 0.24            | 1.43             | 2.20           | 14.33             | 3.80            | 4.71            | 9.64             | 15.04          | 17.86           |
| 17               | 72.49                 | 4.25             | 3.29          | 0.11            | 1.43             | 1.41           | 9.22              | 2.66            | 5.49            | 8.20             | 9.37           | 12.46           |
| 20               | 32.41                 | 3.20             | 1.18          | 0.07            | 0.73             | 0.92           | 4.60              | 1.22            | 5.83            | 7.61             | 3.43           | 8.35            |
| 23               | 13.38                 | 2.77             | 0.37          | 0.05            | 1.62             | 0.28           | 1.59              | 0.51            | 7.71            | 8.46             | 1.03           | 8.53            |
| 26               | 16.82                 | 2.79             | 0.36          | 0.03            | 1.19             | 0.11           | 0.85              | 0.30            | 7.40            | 8.04             | 0.55           | 8.06            |
| 29               | 15.97                 | 2.62             | 0.39          | 0.06            | 1.79             | 0.12           | 1.08              | 0.25            | 9.37            | 9.94             | 0.59           | 9.96            |
| 32               | 14.85                 | 2.64             | 0.62          | 0.11            | 2.26             | 0.18           | 0.90              | 0.24            | 10.17           | 10.79            | 0.68           | 10.81           |
| 35               | 9.50                  | 2.62             | 0.29          | 0.07            | 2.94             | 0.14           | 1.14              | 0.19            | 12.10           | 12.75            | 0.82           | 12.78           |
| 38               | 6.20                  | 2.44             | 0.22          | 0.04            | 3.17             | 0.09           | 1.61              | 0.17            | 13.81           | 14.39            | 1.49           | 14.47           |
| 41               | 6.09                  | 2.41             | 0.24          | 0.04            | 4.29             | 0.08           | 1.73              | 0.17            | 15.59           | 16.36            | 1.60           | 16.44           |

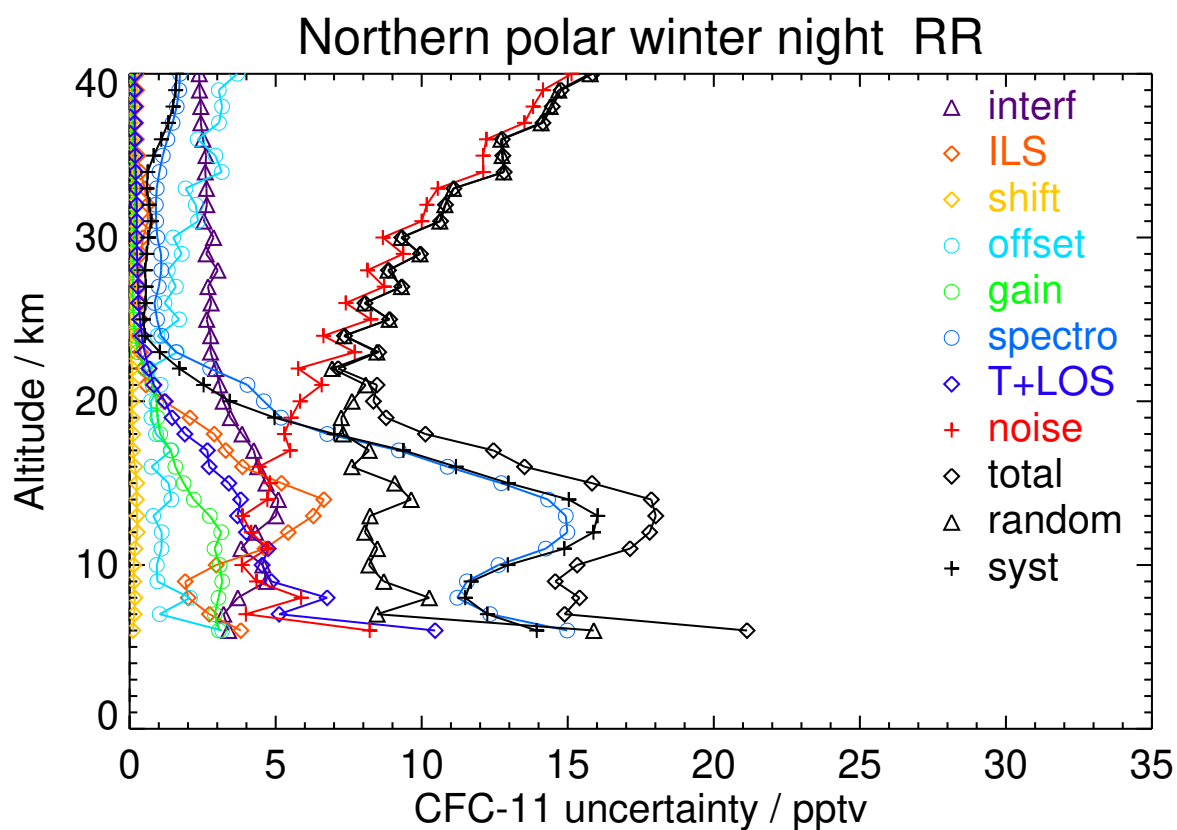**Figure S36.** V8R\_F-11\_261 Northern polar winter night

**Table S38.** CFC-11 error budget for Northern polar spring day. All uncertainties are  $1\sigma$ .

| altitude<br>(km) | mean target<br>(pptv) | interf<br>(pptv) | ILS<br>(pptv) | shift<br>(pptv) | offset<br>(pptv) | gain<br>(pptv) | spectro<br>(pptv) | T+LOS<br>(pptv) | noise<br>(pptv) | random<br>(pptv) | syst<br>(pptv) | total<br>(pptv) |
|------------------|-----------------------|------------------|---------------|-----------------|------------------|----------------|-------------------|-----------------|-----------------|------------------|----------------|-----------------|
| 8                | 235.09                | 3.55             | 2.74          | 0.20            | 1.05             | 3.17           | 12.48             | 5.93            | 4.43            | 9.44             | 12.36          | 15.55           |
| 11               | 195.05                | 3.58             | 2.99          | 0.16            | 0.72             | 2.85           | 11.28             | 3.83            | 3.67            | 7.04             | 11.67          | 13.63           |
| 14               | 161.62                | 4.73             | 4.20          | 0.22            | 0.79             | 2.83           | 13.36             | 3.31            | 4.04            | 7.53             | 14.07          | 15.96           |
| 17               | 88.80                 | 3.82             | 2.35          | 0.08            | 0.70             | 1.80           | 9.87              | 2.29            | 4.76            | 7.03             | 9.99           | 12.21           |
| 20               | 31.22                 | 3.01             | 0.68          | 0.10            | 0.80             | 0.83           | 4.79              | 1.13            | 5.76            | 6.92             | 4.51           | 8.26            |
| 23               | 14.64                 | 2.76             | 0.17          | 0.05            | 1.34             | 0.22           | 1.70              | 0.50            | 7.61            | 8.29             | 1.33           | 8.40            |
| 26               | 4.29                  | 2.58             | 0.20          | 0.02            | 1.41             | 0.15           | 1.16              | 0.28            | 8.93            | 9.46             | 0.66           | 9.49            |
| 29               | 3.68                  | 2.19             | 0.28          | 0.06            | 1.67             | 0.11           | 0.90              | 0.22            | 10.67           | 11.05            | 0.60           | 11.06           |
| 32               | 0.90                  | 1.54             | 0.30          | 0.07            | 2.21             | 0.14           | 0.60              | 0.17            | 12.64           | 12.94            | 0.30           | 12.94           |
| 35               | 6.30                  | 1.33             | 0.13          | 0.04            | 2.82             | 0.17           | 1.16              | 0.15            | 14.91           | 15.25            | 0.95           | 15.28           |
| 38               | 13.70                 | 1.78             | 0.16          | 0.02            | 3.48             | 0.14           | 1.75              | 0.17            | 16.52           | 16.99            | 1.63           | 17.07           |
| 41               | 15.92                 | 2.81             | 0.25          | 0.02            | 4.96             | 0.10           | 2.11              | 0.18            | 17.66           | 18.57            | 2.02           | 18.68           |

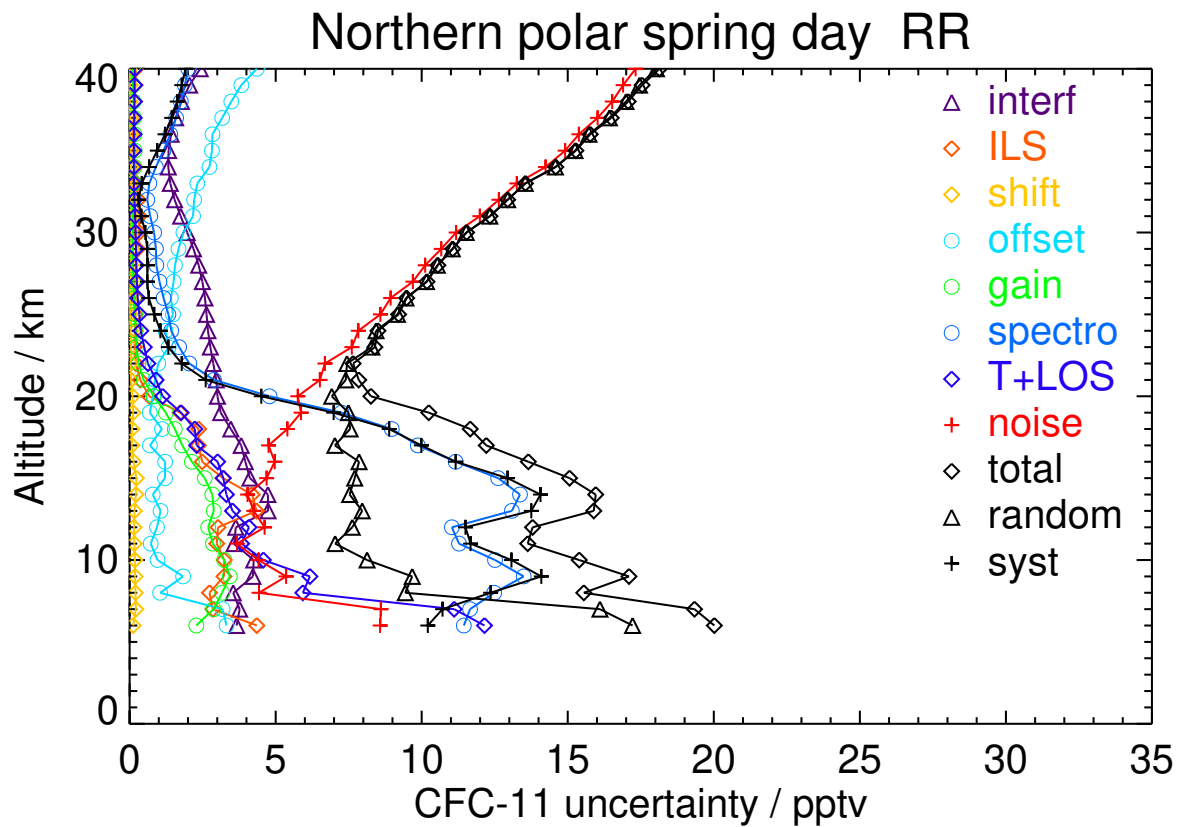

**Figure S37.** V8R\_F-11\_261 Northern polar spring day

**Table S39.** CFC-11 error budget for Northern polar spring night. All uncertainties are  $1\sigma$ .

| altitude<br>(km) | mean target<br>(pptv) | interf<br>(pptv) | ILS<br>(pptv) | shift<br>(pptv) | offset<br>(pptv) | gain<br>(pptv) | spectro<br>(pptv) | T+LOS<br>(pptv) | noise<br>(pptv) | random<br>(pptv) | syst<br>(pptv) | total<br>(pptv) |
|------------------|-----------------------|------------------|---------------|-----------------|------------------|----------------|-------------------|-----------------|-----------------|------------------|----------------|-----------------|
| 8                | 242.25                | 3.55             | 2.88          | 0.28            | 2.40             | 3.01           | 12.80             | 8.51            | 6.76            | 12.47            | 12.75          | 17.83           |
| 11               | 201.16                | 3.90             | 3.44          | 0.25            | 1.01             | 2.93           | 12.22             | 4.31            | 4.24            | 7.88             | 12.66          | 14.91           |
| 14               | 171.07                | 4.79             | 4.14          | 0.28            | 0.86             | 2.50           | 12.17             | 3.40            | 4.43            | 8.21             | 12.61          | 15.05           |
| 17               | 112.86                | 3.73             | 3.13          | 0.19            | 1.16             | 2.24           | 12.51             | 2.93            | 5.23            | 7.89             | 12.66          | 14.92           |
| 20               | 38.92                 | 3.04             | 1.18          | 0.14            | 0.73             | 1.03           | 6.01              | 1.50            | 5.96            | 7.32             | 5.70           | 9.28            |
| 23               | 13.49                 | 2.73             | 0.32          | 0.05            | 1.49             | 0.32           | 2.44              | 0.54            | 7.91            | 8.68             | 1.83           | 8.87            |
| 26               | 5.58                  | 2.57             | 0.18          | 0.02            | 1.51             | 0.13           | 1.06              | 0.29            | 8.81            | 9.34             | 0.76           | 9.37            |
| 29               | 1.33                  | 2.16             | 0.31          | 0.06            | 1.71             | 0.10           | 0.82              | 0.20            | 10.77           | 11.14            | 0.56           | 11.16           |
| 32               | 3.98                  | 1.55             | 0.23          | 0.06            | 2.27             | 0.11           | 0.61              | 0.15            | 12.52           | 12.83            | 0.36           | 12.84           |
| 35               | 7.10                  | 1.29             | 0.11          | 0.04            | 2.90             | 0.12           | 1.22              | 0.14            | 14.79           | 15.13            | 1.11           | 15.17           |
| 38               | 7.64                  | 1.67             | 0.17          | 0.02            | 3.49             | 0.11           | 1.84              | 0.16            | 16.37           | 16.82            | 1.79           | 16.92           |
| 41               | 7.51                  | 2.67             | 0.31          | 0.01            | 5.12             | 0.11           | 2.31              | 0.18            | 17.62           | 18.55            | 2.27           | 18.69           |

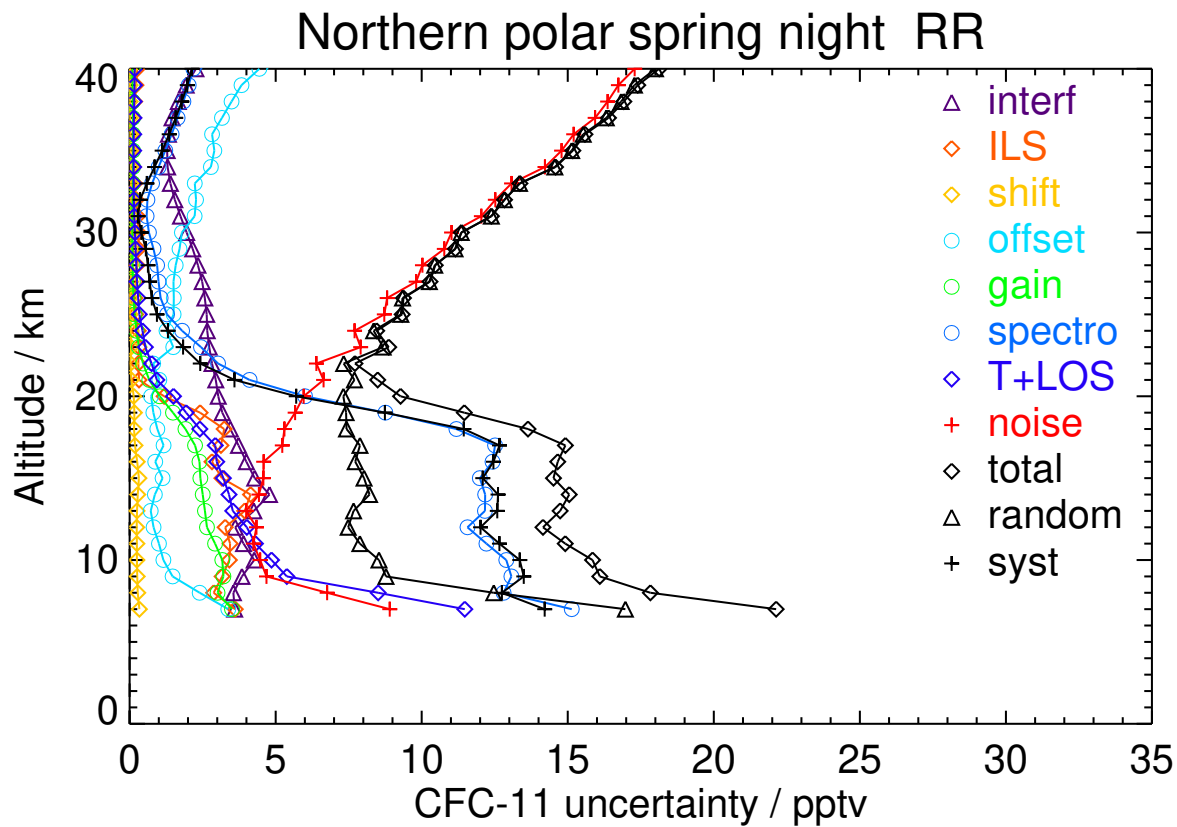

**Figure S38.** V8R\_F-11\_261 Northern polar spring night



**Table S40.** CFC-11 error budget for Northern polar summer day. All uncertainties are  $1\sigma$ .

| altitude<br>(km) | mean target<br>(pptv) | interf<br>(pptv) | ILS<br>(pptv) | shift<br>(pptv) | offset<br>(pptv) | gain<br>(pptv) | spectro<br>(pptv) | T+LOS<br>(pptv) | noise<br>(pptv) | random<br>(pptv) | syst<br>(pptv) | total<br>(pptv) |
|------------------|-----------------------|------------------|---------------|-----------------|------------------|----------------|-------------------|-----------------|-----------------|------------------|----------------|-----------------|
| 8                | 230.57                | 2.99             | 1.88          | 0.08            | 1.40             | 1.51           | 7.05              | 5.56            | 5.24            | 8.33             | 7.45           | 11.17           |
| 11               | 225.20                | 4.65             | 2.56          | 0.22            | 1.49             | 3.11           | 11.07             | 4.63            | 4.83            | 8.55             | 11.59          | 14.40           |
| 14               | 212.49                | 4.09             | 4.55          | 0.07            | 0.55             | 2.15           | 10.72             | 3.67            | 4.11            | 7.20             | 11.66          | 13.70           |
| 17               | 172.32                | 3.67             | 4.36          | 0.18            | 0.85             | 2.68           | 14.39             | 2.93            | 4.45            | 7.00             | 15.06          | 16.61           |
| 20               | 83.34                 | 2.95             | 1.37          | 0.08            | 0.94             | 1.81           | 9.72              | 1.89            | 4.76            | 6.42             | 9.71           | 11.64           |
| 23               | 27.03                 | 2.64             | 0.61          | 0.03            | 1.66             | 0.58           | 3.91              | 0.91            | 7.45            | 8.26             | 3.73           | 9.06            |
| 26               | 11.71                 | 2.52             | 0.19          | 0.07            | 0.87             | 0.10           | 1.05              | 0.37            | 6.74            | 7.29             | 0.82           | 7.33            |
| 29               | 5.57                  | 2.11             | 0.51          | 0.03            | 1.79             | 0.05           | 0.87              | 0.25            | 9.23            | 9.66             | 0.71           | 9.69            |
| 32               | 4.12                  | 1.77             | 0.42          | 0.09            | 1.81             | 0.07           | 0.51              | 0.20            | 9.82            | 10.15            | 0.45           | 10.16           |
| 35               | 0.29                  | 2.27             | 0.16          | 0.08            | 2.31             | 0.13           | 0.80              | 0.16            | 11.46           | 11.92            | 0.66           | 11.93           |
| 38               | 3.03                  | 1.90             | 0.15          | 0.03            | 2.42             | 0.08           | 1.58              | 0.15            | 13.00           | 13.37            | 1.51           | 13.46           |
| 41               | 4.55                  | 2.85             | 0.34          | 0.03            | 2.89             | 0.16           | 2.01              | 0.16            | 14.52           | 15.09            | 1.96           | 15.22           |

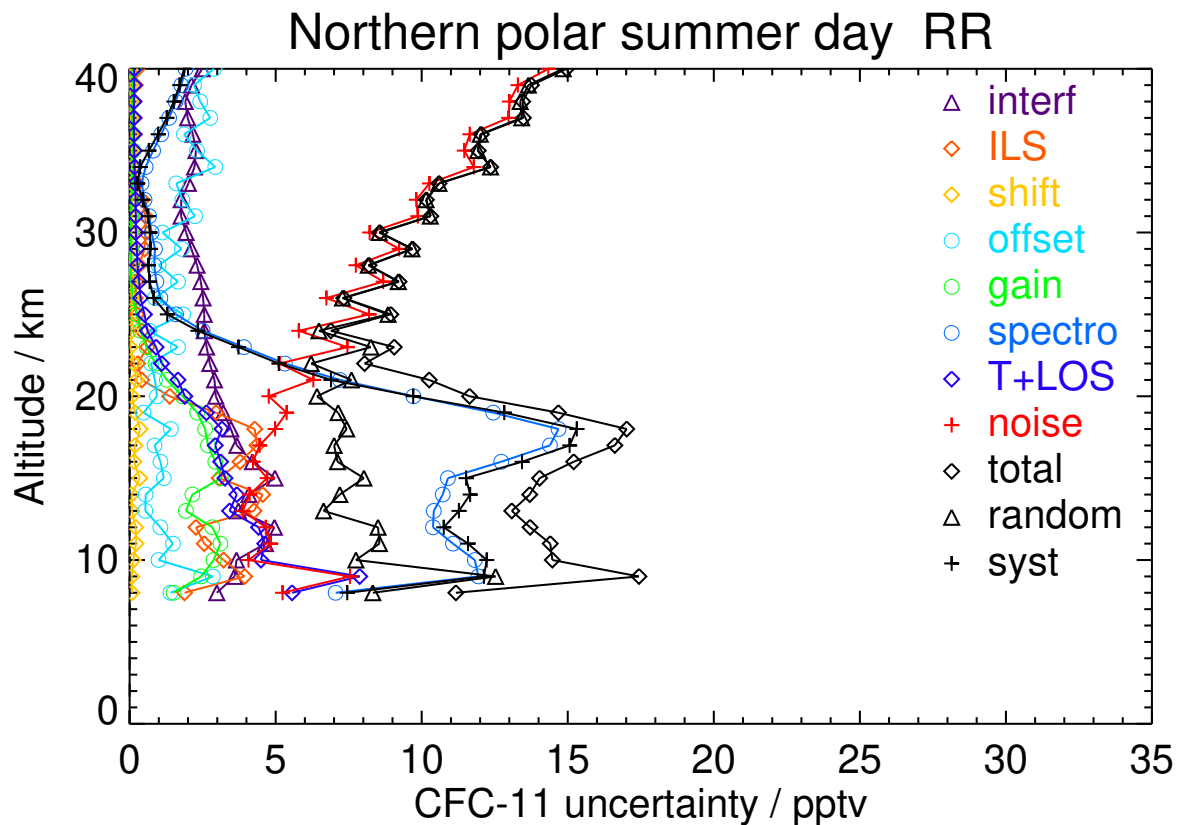

**Figure S39.** V8R\_F-11\_261 Northern polar summer day

**Table S41.** CFC-11 error budget for Northern polar summer night. All uncertainties are  $1\sigma$ .

| altitude<br>(km) | mean target<br>(pptv) | interf<br>(pptv) | ILS<br>(pptv) | shift<br>(pptv) | offset<br>(pptv) | gain<br>(pptv) | spectro<br>(pptv) | T+LOS<br>(pptv) | noise<br>(pptv) | random<br>(pptv) | syst<br>(pptv) | total<br>(pptv) |
|------------------|-----------------------|------------------|---------------|-----------------|------------------|----------------|-------------------|-----------------|-----------------|------------------|----------------|-----------------|
| 14               | 216.28                | 4.38             | 4.05          | 0.08            | 1.88             | 2.45           | 12.19             | 4.28            | 5.41            | 8.58             | 12.95          | 15.53           |
| 17               | 167.47                | 3.53             | 3.07          | 0.13            | 0.51             | 2.71           | 13.83             | 3.39            | 5.27            | 7.41             | 14.32          | 16.13           |
| 20               | 82.39                 | 2.87             | 2.02          | 0.07            | 0.63             | 1.91           | 10.17             | 2.31            | 5.46            | 6.85             | 10.40          | 12.45           |
| 23               | 21.97                 | 2.55             | 0.43          | 0.04            | 1.51             | 0.51           | 3.47              | 0.81            | 7.34            | 8.01             | 3.41           | 8.70            |
| 26               | 6.76                  | 2.49             | 0.14          | 0.04            | 1.25             | 0.09           | 0.90              | 0.38            | 7.49            | 8.03             | 0.69           | 8.06            |
| 29               | 2.43                  | 2.16             | 0.27          | 0.04            | 1.60             | 0.04           | 0.62              | 0.21            | 9.37            | 9.77             | 0.28           | 9.78            |
| 32               | 5.59                  | 1.52             | 0.33          | 0.09            | 2.06             | 0.09           | 0.69              | 0.17            | 10.36           | 10.69            | 0.37           | 10.70           |
| 35               | 5.72                  | 1.35             | 0.17          | 0.08            | 2.64             | 0.10           | 0.76              | 0.16            | 12.39           | 12.75            | 0.57           | 12.76           |
| 38               | -0.38                 | 1.56             | 0.16          | 0.03            | 2.81             | 0.06           | 1.55              | 0.16            | 13.98           | 14.36            | 1.49           | 14.43           |
| 41               | 2.25                  | 1.56             | 0.25          | 0.02            | 3.17             | 0.08           | 1.99              | 0.17            | 15.49           | 15.90            | 1.97           | 16.02           |

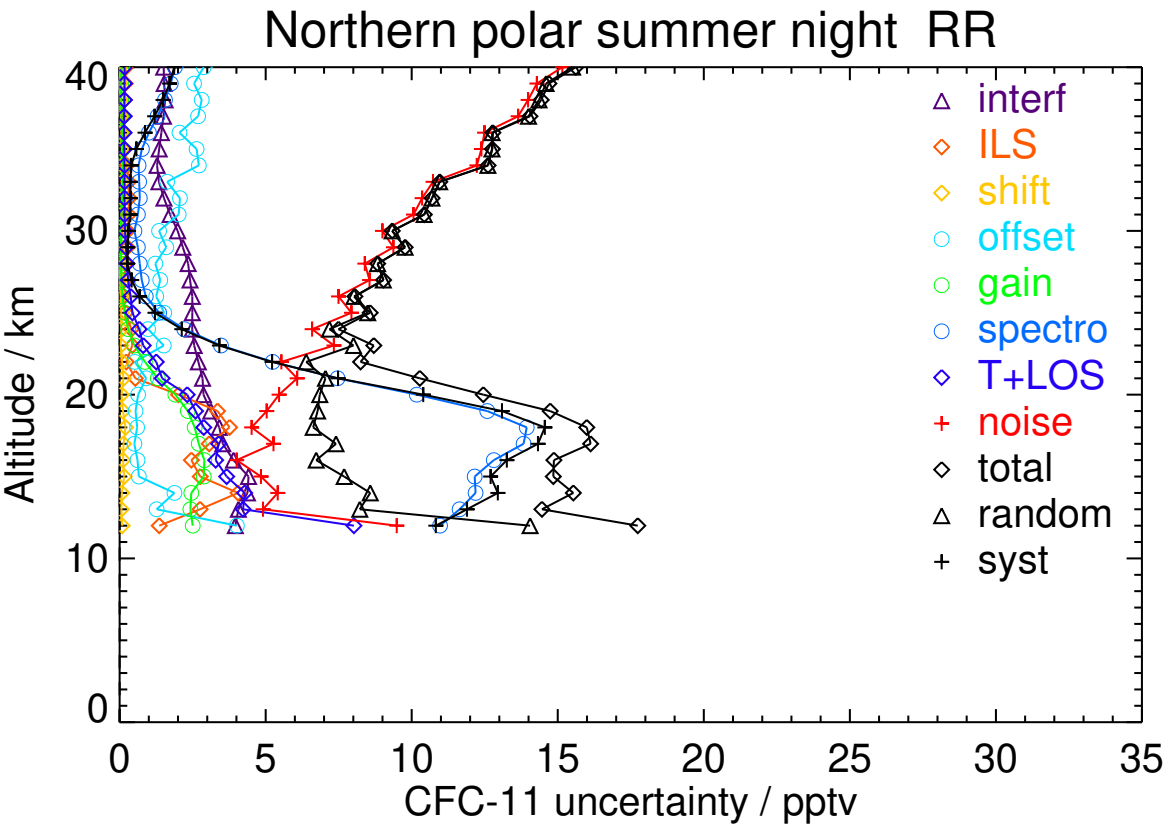

**Figure S40.** V8R\_F-11\_261 Northern polar summer night

**Table S42.** CFC-11 error budget for Northern polar autumn day. All uncertainties are  $1\sigma$ .

| altitude<br>(km) | mean target<br>(pptv) | interf<br>(pptv) | ILS<br>(pptv) | shift<br>(pptv) | offset<br>(pptv) | gain<br>(pptv) | spectro<br>(pptv) | T+LOS<br>(pptv) | noise<br>(pptv) | random<br>(pptv) | syst<br>(pptv) | total<br>(pptv) |
|------------------|-----------------------|------------------|---------------|-----------------|------------------|----------------|-------------------|-----------------|-----------------|------------------|----------------|-----------------|
| 8                | 267.07                | 3.28             | 1.71          | 0.39            | 3.17             | 2.46           | 15.15             | 8.64            | 8.24            | 12.79            | 15.44          | 20.05           |
| 11               | 227.08                | 3.85             | 2.56          | 0.22            | 3.27             | 2.60           | 12.05             | 7.43            | 8.43            | 13.08            | 11.79          | 17.61           |
| 14               | 208.03                | 4.48             | 5.01          | 0.31            | 0.85             | 2.57           | 14.73             | 4.42            | 5.03            | 8.43             | 15.60          | 17.73           |
| 17               | 124.01                | 3.69             | 3.28          | 0.18            | 0.95             | 2.22           | 13.87             | 3.22            | 5.24            | 7.60             | 14.23          | 16.13           |
| 20               | 44.22                 | 2.93             | 1.82          | 0.16            | 0.82             | 1.10           | 7.37              | 1.88            | 6.29            | 7.98             | 6.89           | 10.55           |
| 23               | 12.88                 | 2.60             | 0.25          | 0.05            | 1.39             | 0.28           | 2.38              | 0.61            | 7.72            | 8.41             | 1.90           | 8.63            |
| 26               | 5.26                  | 2.49             | 0.17          | 0.02            | 1.54             | 0.10           | 1.08              | 0.34            | 8.90            | 9.40             | 0.78           | 9.44            |
| 29               | 10.72                 | 2.07             | 0.22          | 0.05            | 1.72             | 0.13           | 1.07              | 0.25            | 10.60           | 10.97            | 0.69           | 10.99           |
| 32               | 7.81                  | 1.58             | 0.25          | 0.06            | 2.34             | 0.10           | 0.78              | 0.21            | 12.49           | 12.83            | 0.37           | 12.83           |
| 35               | 3.38                  | 1.31             | 0.12          | 0.04            | 3.05             | 0.08           | 1.23              | 0.16            | 15.00           | 15.38            | 1.08           | 15.42           |
| 38               | 2.45                  | 1.30             | 0.16          | 0.02            | 3.98             | 0.08           | 1.94              | 0.18            | 16.84           | 17.37            | 1.86           | 17.47           |
| 41               | 0.96                  | 1.53             | 0.25          | 0.02            | 6.31             | 0.08           | 2.41              | 0.20            | 18.46           | 19.57            | 2.36           | 19.72           |

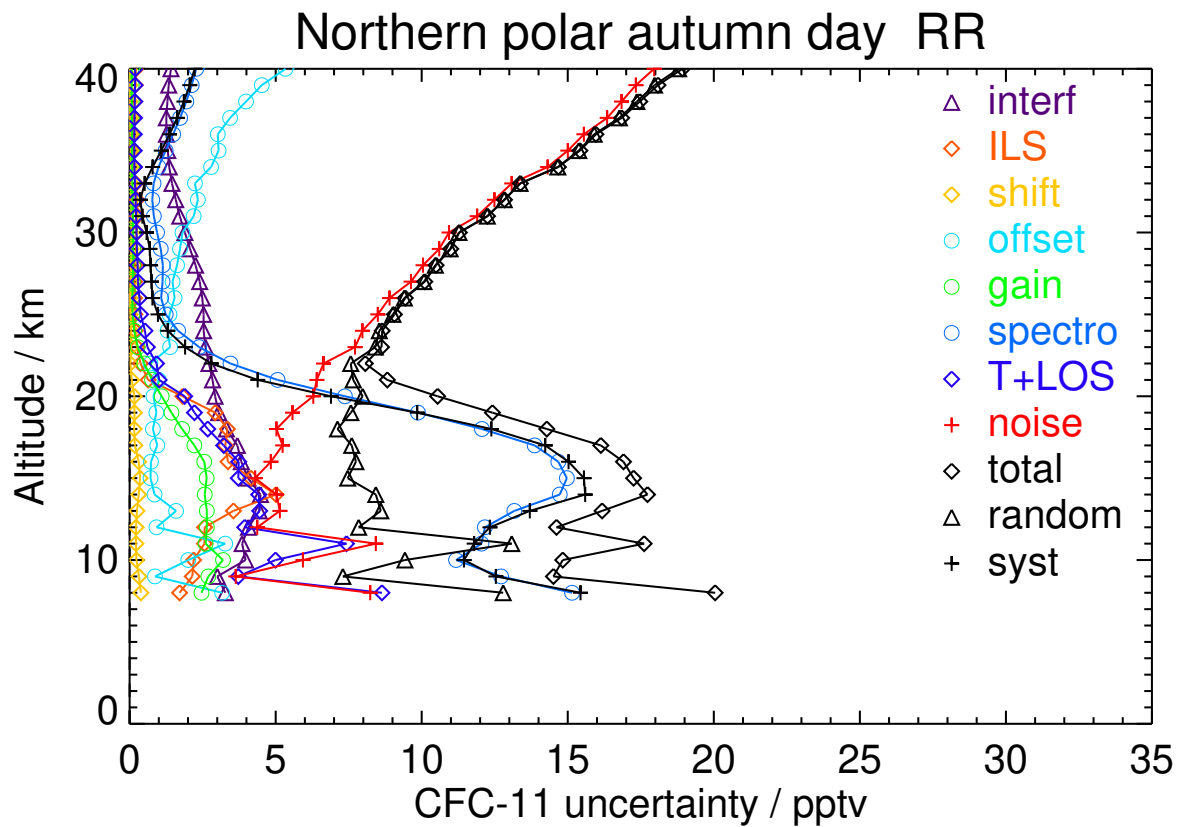

**Figure S41.** V8R\_F-11\_261 Northern polar autumn day

**Table S43.** CFC-11 error budget for Northern polar autumn night. All uncertainties are  $1\sigma$ .

| altitude<br>(km) | mean target<br>(pptv) | interf<br>(pptv) | ILS<br>(pptv) | shift<br>(pptv) | offset<br>(pptv) | gain<br>(pptv) | spectro<br>(pptv) | T+LOS<br>(pptv) | noise<br>(pptv) | random<br>(pptv) | syst<br>(pptv) | total<br>(pptv) |
|------------------|-----------------------|------------------|---------------|-----------------|------------------|----------------|-------------------|-----------------|-----------------|------------------|----------------|-----------------|
| 8                | 250.69                | 2.95             | 1.83          | 0.22            | 2.85             | 2.51           | 12.72             | 7.80            | 7.32            | 11.47            | 13.08          | 17.40           |
| 11               | 225.92                | 3.76             | 2.77          | 0.23            | 3.28             | 2.73           | 12.56             | 7.20            | 8.13            | 12.44            | 12.69          | 17.77           |
| 14               | 203.15                | 4.46             | 5.24          | 0.35            | 0.86             | 2.71           | 14.60             | 4.32            | 4.89            | 8.38             | 15.53          | 17.65           |
| 17               | 113.95                | 3.73             | 3.20          | 0.20            | 0.83             | 2.35           | 13.38             | 3.09            | 5.23            | 7.63             | 13.72          | 15.70           |
| 20               | 42.58                 | 2.96             | 1.53          | 0.15            | 0.75             | 1.10           | 6.72              | 1.73            | 6.22            | 7.93             | 6.07           | 9.99            |
| 23               | 10.75                 | 2.60             | 0.33          | 0.05            | 1.45             | 0.32           | 2.38              | 0.59            | 7.80            | 8.56             | 1.64           | 8.72            |
| 26               | 10.99                 | 2.49             | 0.21          | 0.02            | 1.52             | 0.12           | 1.25              | 0.35            | 8.87            | 9.39             | 0.91           | 9.43            |
| 29               | 4.80                  | 2.10             | 0.40          | 0.08            | 1.75             | 0.11           | 1.17              | 0.30            | 10.63           | 11.01            | 0.97           | 11.05           |
| 32               | -2.53                 | 1.59             | 0.19          | 0.05            | 2.33             | 0.07           | 0.67              | 0.18            | 12.34           | 12.67            | 0.48           | 12.68           |
| 35               | 3.74                  | 1.26             | 0.13          | 0.03            | 3.01             | 0.09           | 1.40              | 0.16            | 14.84           | 15.20            | 1.27           | 15.26           |
| 38               | 3.90                  | 1.21             | 0.21          | 0.01            | 3.83             | 0.10           | 1.90              | 0.18            | 16.74           | 17.22            | 1.81           | 17.32           |
| 41               | 1.20                  | 1.47             | 0.29          | 0.01            | 5.99             | 0.09           | 2.29              | 0.20            | 18.36           | 19.38            | 2.24           | 19.50           |

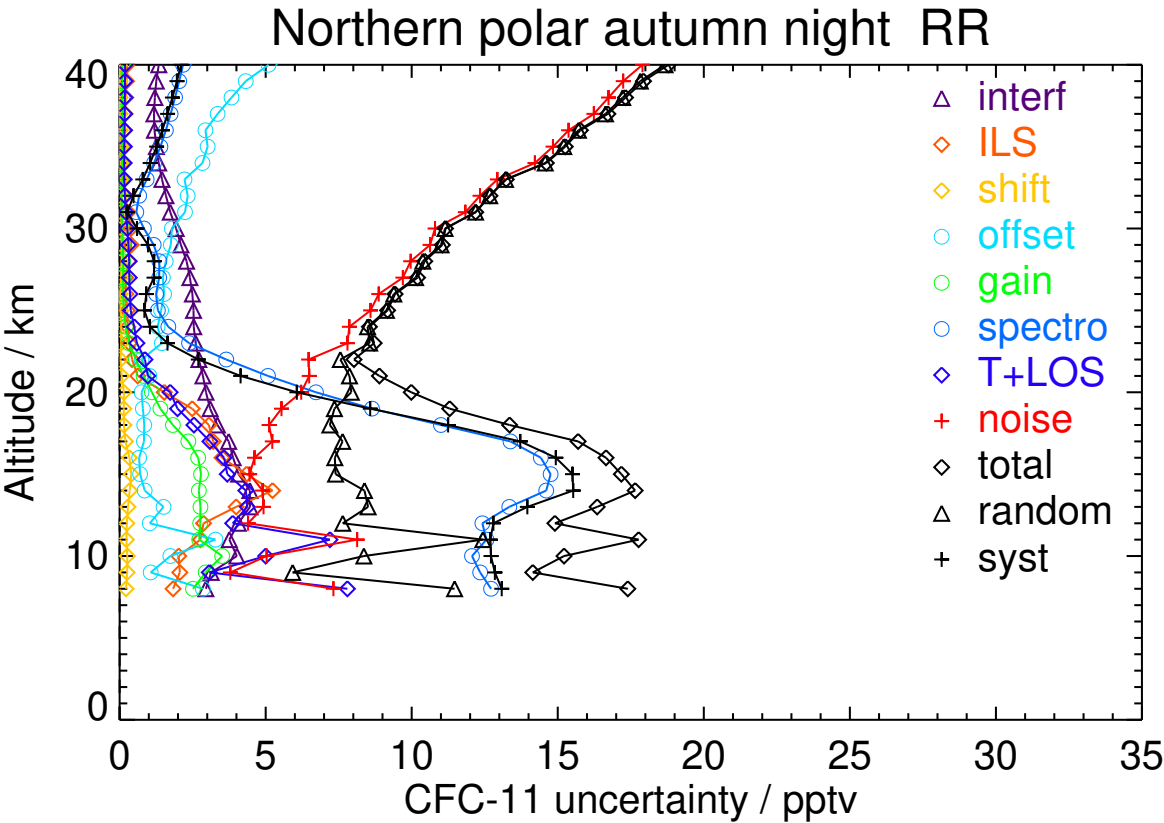

**Figure S42.** V8R\_F-11\_261 Northern polar autumn night

**Table S44.** CFC-11 error budget for Northern midlatitude winter day. All uncertainties are  $1\sigma$ .

| altitude<br>(km) | mean target<br>(pptv) | interf<br>(pptv) | ILS<br>(pptv) | shift<br>(pptv) | offset<br>(pptv) | gain<br>(pptv) | spectro<br>(pptv) | T+LOS<br>(pptv) | noise<br>(pptv) | random<br>(pptv) | syst<br>(pptv) | total<br>(pptv) |
|------------------|-----------------------|------------------|---------------|-----------------|------------------|----------------|-------------------|-----------------|-----------------|------------------|----------------|-----------------|
| 8                | 252.51                | 3.43             | 1.81          | 0.19            | 1.45             | 3.06           | 11.80             | 5.58            | 4.84            | 9.10             | 11.73          | 14.85           |
| 11               | 233.61                | 3.92             | 2.93          | 0.22            | 1.50             | 2.93           | 12.07             | 4.55            | 4.63            | 8.53             | 12.24          | 14.92           |
| 14               | 193.83                | 4.85             | 4.40          | 0.27            | 1.50             | 2.65           | 12.38             | 3.75            | 4.52            | 8.50             | 12.95          | 15.49           |
| 17               | 151.62                | 4.01             | 2.99          | 0.13            | 1.04             | 2.44           | 13.41             | 3.00            | 5.11            | 8.21             | 13.40          | 15.72           |
| 20               | 65.44                 | 3.06             | 2.16          | 0.20            | 0.98             | 1.36           | 7.92              | 1.90            | 5.87            | 7.78             | 7.56           | 10.85           |
| 23               | 42.82                 | 2.68             | 0.85          | 0.06            | 0.86             | 0.56           | 4.50              | 0.91            | 6.96            | 8.01             | 3.79           | 8.86            |
| 26               | 11.52                 | 2.48             | 0.44          | 0.03            | 1.17             | 0.20           | 1.85              | 0.44            | 7.71            | 8.27             | 1.53           | 8.41            |
| 29               | 9.45                  | 2.44             | 0.48          | 0.08            | 1.51             | 0.09           | 1.10              | 0.26            | 9.40            | 9.89             | 0.57           | 9.91            |
| 32               | 11.16                 | 1.83             | 0.39          | 0.10            | 2.03             | 0.09           | 0.89              | 0.20            | 10.44           | 10.83            | 0.45           | 10.84           |
| 35               | 7.78                  | 1.92             | 0.16          | 0.05            | 2.65             | 0.10           | 1.13              | 0.17            | 12.66           | 13.10            | 0.86           | 13.13           |
| 38               | 3.87                  | 2.30             | 0.13          | 0.02            | 3.00             | 0.10           | 1.76              | 0.16            | 14.58           | 15.07            | 1.64           | 15.16           |
| 41               | 0.85                  | 2.58             | 0.19          | 0.02            | 4.26             | 0.11           | 2.10              | 0.17            | 16.25           | 17.01            | 2.03           | 17.13           |

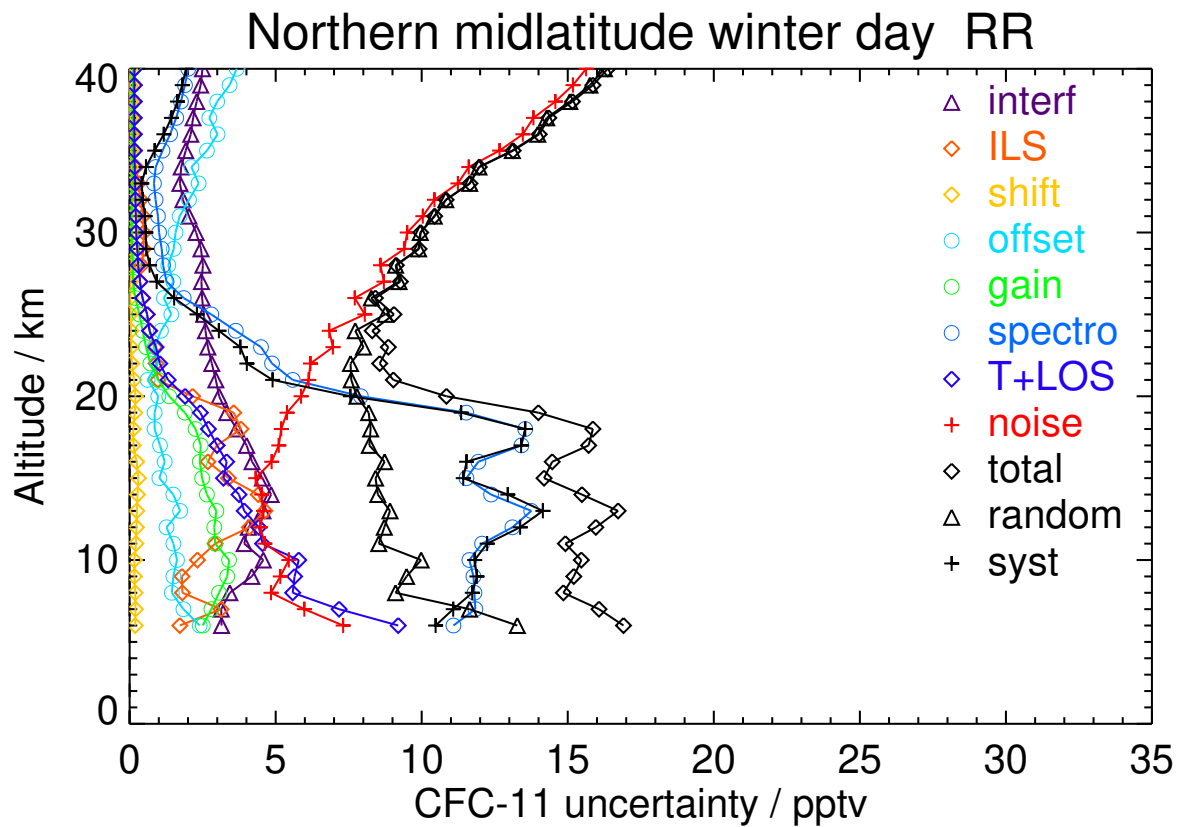

**Figure S43.** V8R\_F-11\_261 Northern midlatitude winter day

**Table S45.** CFC-11 error budget for Northern midlatitude winter night. All uncertainties are  $1\sigma$ .

| altitude<br>(km) | mean target<br>(pptv) | interf<br>(pptv) | ILS<br>(pptv) | shift<br>(pptv) | offset<br>(pptv) | gain<br>(pptv) | spectro<br>(pptv) | T+LOS<br>(pptv) | noise<br>(pptv) | random<br>(pptv) | syst<br>(pptv) | total<br>(pptv) |
|------------------|-----------------------|------------------|---------------|-----------------|------------------|----------------|-------------------|-----------------|-----------------|------------------|----------------|-----------------|
| 8                | 247.58                | 3.51             | 1.18          | 0.24            | 1.55             | 3.11           | 11.24             | 5.66            | 4.91            | 8.81             | 11.43          | 14.44           |
| 11               | 231.18                | 3.83             | 2.84          | 0.22            | 0.91             | 2.92           | 12.62             | 4.44            | 4.29            | 7.90             | 12.92          | 15.15           |
| 14               | 208.49                | 4.70             | 4.02          | 0.25            | 1.33             | 2.57           | 11.86             | 3.73            | 4.47            | 8.34             | 12.31          | 14.87           |
| 17               | 158.02                | 4.10             | 3.26          | 0.16            | 1.22             | 2.68           | 14.29             | 3.31            | 5.22            | 8.66             | 14.27          | 16.69           |
| 20               | 75.60                 | 3.08             | 2.58          | 0.20            | 0.94             | 1.46           | 8.94              | 2.03            | 5.93            | 8.36             | 8.27           | 11.76           |
| 23               | 38.38                 | 2.71             | 0.72          | 0.07            | 0.86             | 0.48           | 4.36              | 0.92            | 7.01            | 7.91             | 3.91           | 8.82            |
| 26               | 15.43                 | 2.50             | 0.45          | 0.03            | 1.23             | 0.19           | 1.96              | 0.43            | 7.79            | 8.38             | 1.56           | 8.52            |
| 29               | 9.86                  | 2.42             | 0.42          | 0.07            | 1.51             | 0.07           | 0.92              | 0.26            | 9.55            | 10.00            | 0.67           | 10.02           |
| 32               | 12.81                 | 1.92             | 0.43          | 0.10            | 2.00             | 0.08           | 0.91              | 0.20            | 10.37           | 10.77            | 0.53           | 10.78           |
| 35               | 8.82                  | 2.22             | 0.19          | 0.06            | 2.62             | 0.09           | 0.98              | 0.17            | 12.57           | 13.05            | 0.75           | 13.07           |
| 38               | 3.73                  | 2.74             | 0.19          | 0.02            | 2.95             | 0.16           | 1.71              | 0.16            | 14.29           | 14.86            | 1.62           | 14.95           |
| 41               | 3.92                  | 3.14             | 0.24          | 0.02            | 3.98             | 0.16           | 2.13              | 0.18            | 15.82           | 16.62            | 2.08           | 16.75           |

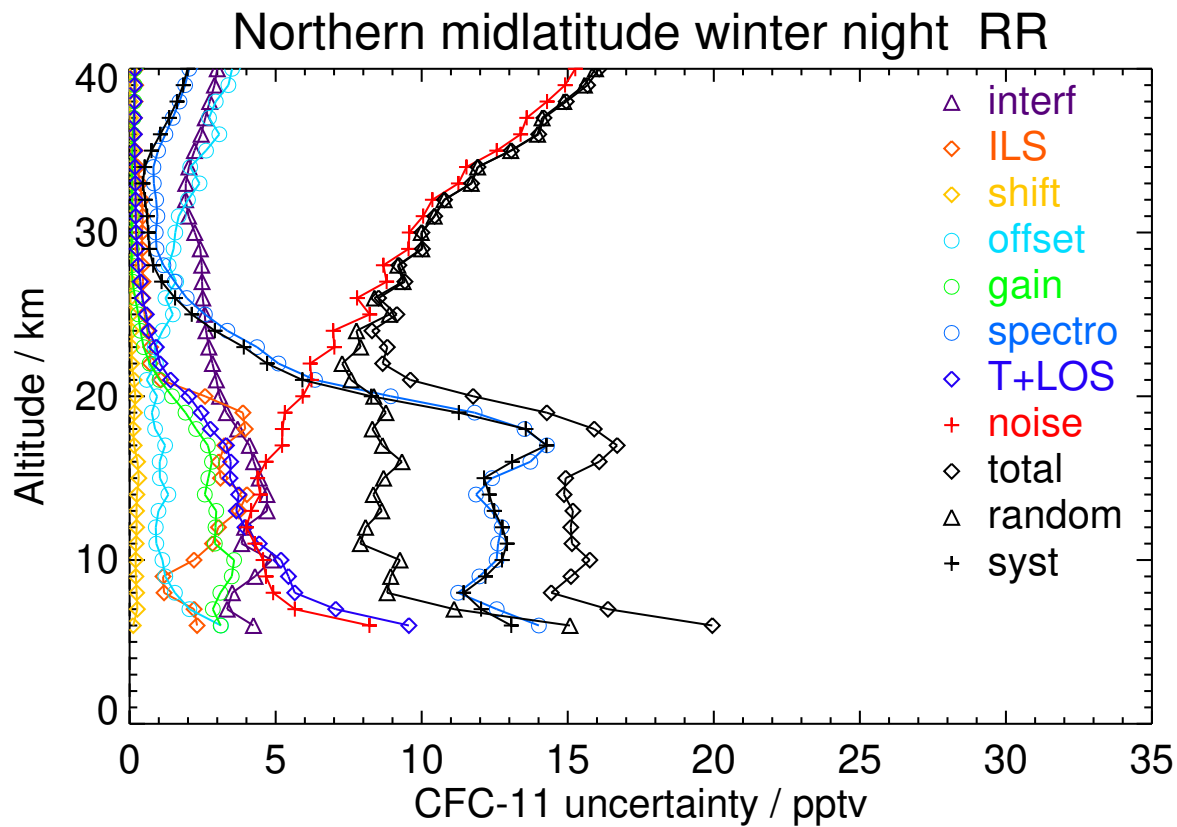

**Figure S44.** V8R\_F-11\_261 Northern midlatitude winter night

**Table S46.** CFC-11 error budget for Northern midlatitude spring day. All uncertainties are  $1\sigma$ .

| altitude<br>(km) | mean target<br>(pptv) | interf<br>(pptv) | ILS<br>(pptv) | shift<br>(pptv) | offset<br>(pptv) | gain<br>(pptv) | spectro<br>(pptv) | T+LOS<br>(pptv) | noise<br>(pptv) | random<br>(pptv) | syst<br>(pptv) | total<br>(pptv) |
|------------------|-----------------------|------------------|---------------|-----------------|------------------|----------------|-------------------|-----------------|-----------------|------------------|----------------|-----------------|
| 8                | 249.15                | 3.30             | 1.79          | 0.54            | 1.92             | 2.82           | 11.26             | 7.26            | 6.26            | 11.21            | 10.90          | 15.64           |
| 11               | 217.53                | 4.56             | 2.63          | 0.20            | 1.36             | 3.33           | 11.65             | 4.95            | 5.07            | 9.19             | 11.93          | 15.06           |
| 14               | 206.63                | 4.76             | 3.93          | 0.24            | 1.23             | 2.79           | 12.25             | 3.56            | 4.45            | 8.30             | 12.69          | 15.17           |
| 17               | 162.83                | 3.90             | 3.04          | 0.07            | 0.97             | 2.47           | 13.23             | 3.08            | 5.05            | 7.94             | 13.36          | 15.54           |
| 20               | 82.37                 | 3.09             | 2.26          | 0.20            | 0.82             | 1.77           | 10.43             | 2.02            | 5.91            | 8.08             | 10.05          | 12.89           |
| 23               | 29.95                 | 2.70             | 0.64          | 0.07            | 0.84             | 0.53           | 4.50              | 0.91            | 6.71            | 7.67             | 3.98           | 8.65            |
| 26               | 10.40                 | 2.55             | 0.36          | 0.03            | 1.34             | 0.17           | 1.74              | 0.41            | 8.50            | 9.04             | 1.48           | 9.16            |
| 29               | 2.52                  | 2.30             | 0.36          | 0.06            | 1.42             | 0.08           | 0.72              | 0.22            | 9.55            | 9.95             | 0.38           | 9.96            |
| 32               | 5.10                  | 1.73             | 0.32          | 0.07            | 2.07             | 0.08           | 0.67              | 0.16            | 11.14           | 11.48            | 0.48           | 11.49           |
| 35               | 7.42                  | 1.89             | 0.14          | 0.05            | 2.70             | 0.09           | 1.33              | 0.15            | 13.21           | 13.63            | 1.16           | 13.68           |
| 38               | 8.79                  | 2.45             | 0.18          | 0.02            | 3.04             | 0.11           | 1.96              | 0.16            | 14.81           | 15.33            | 1.88           | 15.45           |
| 41               | 11.80                 | 2.96             | 0.29          | 0.02            | 4.02             | 0.17           | 2.16              | 0.17            | 16.22           | 16.98            | 2.11           | 17.11           |

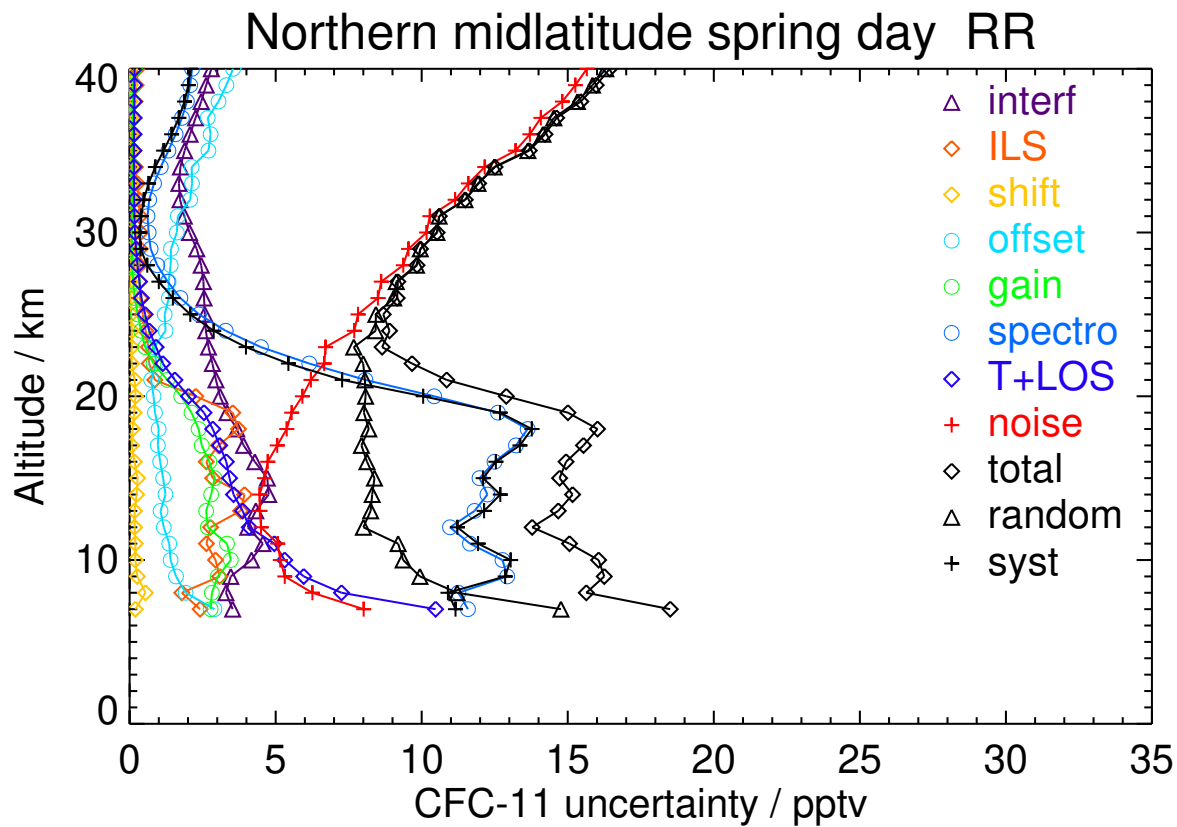

**Figure S45.** V8R\_F-11\_261 Northern midlatitude spring day

**Table S47.** CFC-11 error budget for Northern midlatitude spring night. All uncertainties are  $1\sigma$ .

| altitude<br>(km) | mean target<br>(pptv) | interf<br>(pptv) | ILS<br>(pptv) | shift<br>(pptv) | offset<br>(pptv) | gain<br>(pptv) | spectro<br>(pptv) | T+LOS<br>(pptv) | noise<br>(pptv) | random<br>(pptv) | syst<br>(pptv) | total<br>(pptv) |
|------------------|-----------------------|------------------|---------------|-----------------|------------------|----------------|-------------------|-----------------|-----------------|------------------|----------------|-----------------|
| 8                | 246.71                | 3.33             | 2.58          | 0.23            | 2.13             | 2.82           | 12.31             | 7.60            | 6.30            | 11.58            | 12.05          | 16.71           |
| 11               | 219.95                | 4.23             | 2.76          | 0.19            | 0.98             | 3.17           | 11.55             | 4.52            | 4.38            | 8.53             | 11.69          | 14.47           |
| 14               | 200.41                | 4.82             | 4.52          | 0.25            | 0.88             | 2.94           | 12.96             | 3.53            | 4.25            | 8.05             | 13.67          | 15.86           |
| 17               | 141.64                | 3.89             | 2.91          | 0.07            | 0.91             | 2.24           | 12.37             | 2.88            | 4.92            | 7.79             | 12.43          | 14.67           |
| 20               | 74.91                 | 3.04             | 1.59          | 0.20            | 0.74             | 1.56           | 8.81              | 1.77            | 5.80            | 7.70             | 8.36           | 11.36           |
| 23               | 28.41                 | 2.69             | 0.62          | 0.09            | 0.87             | 0.55           | 4.02              | 0.81            | 6.76            | 7.65             | 3.58           | 8.44            |
| 26               | 14.22                 | 2.56             | 0.34          | 0.02            | 1.33             | 0.17           | 1.58              | 0.39            | 8.34            | 8.88             | 1.33           | 8.98            |
| 29               | 2.45                  | 2.25             | 0.49          | 0.07            | 1.47             | 0.06           | 0.88              | 0.24            | 9.64            | 10.04            | 0.64           | 10.06           |
| 32               | 3.65                  | 1.66             | 0.34          | 0.08            | 1.99             | 0.08           | 0.78              | 0.17            | 11.01           | 11.34            | 0.43           | 11.35           |
| 35               | 5.71                  | 1.81             | 0.14          | 0.05            | 2.57             | 0.09           | 1.20              | 0.15            | 13.04           | 13.43            | 1.09           | 13.47           |
| 38               | 3.09                  | 2.24             | 0.17          | 0.02            | 2.92             | 0.09           | 1.84              | 0.16            | 14.80           | 15.27            | 1.75           | 15.37           |
| 41               | 5.33                  | 2.92             | 0.29          | 0.02            | 3.99             | 0.14           | 2.19              | 0.18            | 16.24           | 16.98            | 2.13           | 17.12           |

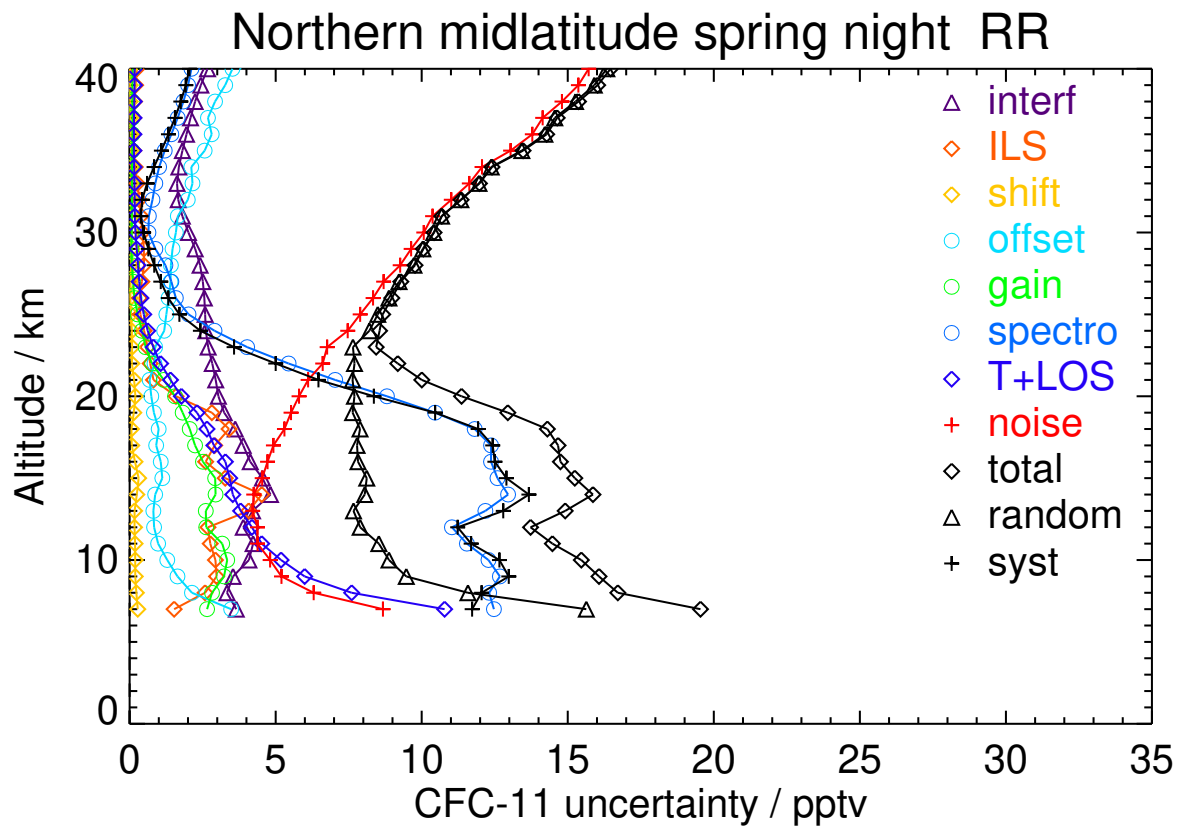

**Figure S46.** V8R\_F-11\_261 Northern midlatitude spring night



**Table S48.** CFC-11 error budget for Northern midlatitude summer day. All uncertainties are  $1\sigma$ .

| altitude<br>(km) | mean target<br>(pptv) | interf<br>(pptv) | ILS<br>(pptv) | shift<br>(pptv) | offset<br>(pptv) | gain<br>(pptv) | spectro<br>(pptv) | T+LOS<br>(pptv) | noise<br>(pptv) | random<br>(pptv) | syst<br>(pptv) | total<br>(pptv) |
|------------------|-----------------------|------------------|---------------|-----------------|------------------|----------------|-------------------|-----------------|-----------------|------------------|----------------|-----------------|
| 8                | 239.99                | 3.00             | 0.94          | 0.13            | 2.62             | 2.03           | 10.01             | 7.91            | 7.21            | 12.25            | 9.25           | 15.35           |
| 11               | 245.12                | 4.62             | 1.30          | 0.16            | 1.47             | 3.76           | 9.53              | 4.97            | 5.00            | 8.85             | 10.08          | 13.41           |
| 14               | 249.08                | 6.03             | 2.25          | 0.23            | 1.46             | 3.55           | 11.02             | 3.74            | 4.85            | 8.94             | 11.63          | 14.67           |
| 17               | 236.48                | 4.58             | 1.92          | 0.08            | 1.18             | 3.64           | 13.41             | 3.96            | 5.50            | 8.51             | 13.89          | 16.29           |
| 20               | 152.88                | 3.10             | 4.74          | 0.31            | 1.12             | 2.83           | 16.44             | 3.05            | 6.11            | 7.80             | 17.25          | 18.93           |
| 23               | 49.13                 | 2.68             | 1.30          | 0.07            | 0.81             | 0.82           | 7.87              | 1.53            | 7.12            | 8.03             | 7.79           | 11.19           |
| 26               | 11.94                 | 2.46             | 0.64          | 0.03            | 1.01             | 0.14           | 2.16              | 0.52            | 7.43            | 7.99             | 1.93           | 8.22            |
| 29               | 6.04                  | 2.51             | 0.40          | 0.06            | 1.37             | 0.12           | 0.85              | 0.25            | 9.27            | 9.75             | 0.36           | 9.75            |
| 32               | 4.15                  | 1.74             | 0.24          | 0.07            | 1.88             | 0.04           | 0.70              | 0.16            | 10.19           | 10.53            | 0.37           | 10.54           |
| 35               | 3.07                  | 1.56             | 0.12          | 0.06            | 2.49             | 0.06           | 1.14              | 0.14            | 12.39           | 12.74            | 1.02           | 12.79           |
| 38               | 6.31                  | 2.12             | 0.16          | 0.03            | 2.70             | 0.12           | 1.76              | 0.17            | 14.02           | 14.44            | 1.71           | 14.54           |
| 41               | 2.43                  | 2.32             | 0.23          | 0.02            | 3.34             | 0.13           | 2.09              | 0.19            | 15.52           | 16.05            | 2.05           | 16.18           |

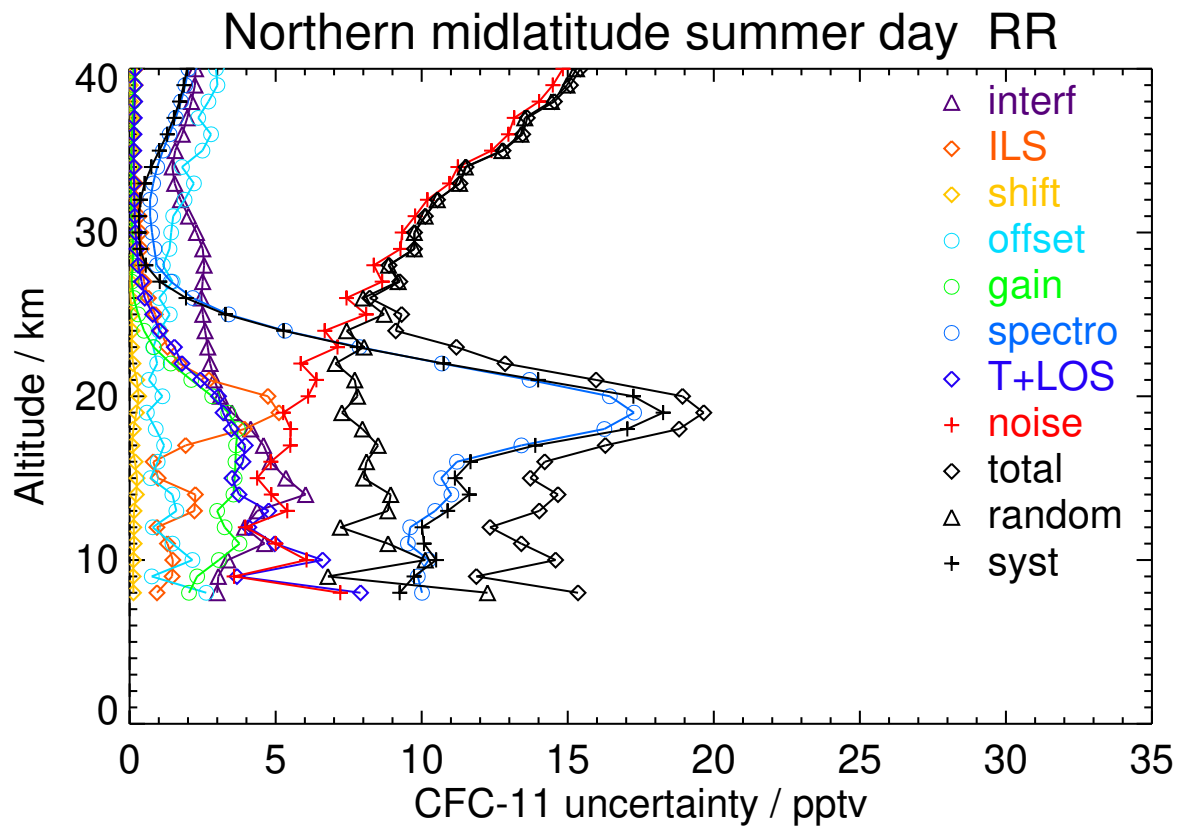

**Figure S47.** V8R\_F-11\_261 Northern midlatitude summer day

**Table S49.** CFC-11 error budget for Northern midlatitude summer night. All uncertainties are  $1\sigma$ .

| altitude<br>(km) | mean target<br>(pptv) | interf<br>(pptv) | ILS<br>(pptv) | shift<br>(pptv) | offset<br>(pptv) | gain<br>(pptv) | spectro<br>(pptv) | T+LOS<br>(pptv) | noise<br>(pptv) | random<br>(pptv) | syst<br>(pptv) | total<br>(pptv) |
|------------------|-----------------------|------------------|---------------|-----------------|------------------|----------------|-------------------|-----------------|-----------------|------------------|----------------|-----------------|
| 8                | 256.97                | 3.47             | 1.29          | 0.12            | 3.08             | 2.57           | 11.30             | 8.56            | 7.32            | 12.32            | 11.51          | 16.86           |
| 11               | 248.37                | 3.71             | 1.06          | 0.15            | 1.53             | 3.06           | 10.17             | 4.86            | 4.98            | 8.32             | 10.45          | 13.36           |
| 14               | 245.15                | 5.04             | 2.96          | 0.22            | 0.81             | 3.16           | 11.17             | 4.15            | 4.72            | 8.34             | 11.82          | 14.46           |
| 17               | 223.63                | 4.36             | 2.18          | 0.05            | 0.94             | 3.19           | 13.09             | 3.69            | 5.13            | 8.08             | 13.45          | 15.69           |
| 20               | 146.48                | 3.01             | 3.91          | 0.27            | 0.97             | 2.34           | 14.92             | 2.80            | 5.86            | 7.62             | 15.41          | 17.19           |
| 23               | 53.35                 | 2.68             | 1.32          | 0.09            | 0.80             | 0.80           | 7.97              | 1.50            | 6.75            | 7.64             | 7.95           | 11.03           |
| 26               | 8.20                  | 2.46             | 0.63          | 0.05            | 1.17             | 0.11           | 2.18              | 0.55            | 7.72            | 8.24             | 2.14           | 8.51            |
| 29               | 4.68                  | 2.45             | 0.28          | 0.04            | 1.37             | 0.10           | 0.84              | 0.20            | 9.15            | 9.60             | 0.48           | 9.61            |
| 32               | 11.33                 | 1.70             | 0.30          | 0.07            | 1.88             | 0.08           | 0.82              | 0.16            | 10.18           | 10.52            | 0.41           | 10.53           |
| 35               | 5.24                  | 1.77             | 0.23          | 0.08            | 2.42             | 0.07           | 1.01              | 0.16            | 12.34           | 12.72            | 0.75           | 12.74           |
| 38               | 6.68                  | 2.05             | 0.20          | 0.04            | 2.65             | 0.08           | 1.78              | 0.17            | 13.99           | 14.40            | 1.67           | 14.50           |
| 41               | 8.25                  | 2.24             | 0.26          | 0.02            | 3.26             | 0.07           | 2.14              | 0.18            | 15.41           | 15.92            | 2.11           | 16.06           |

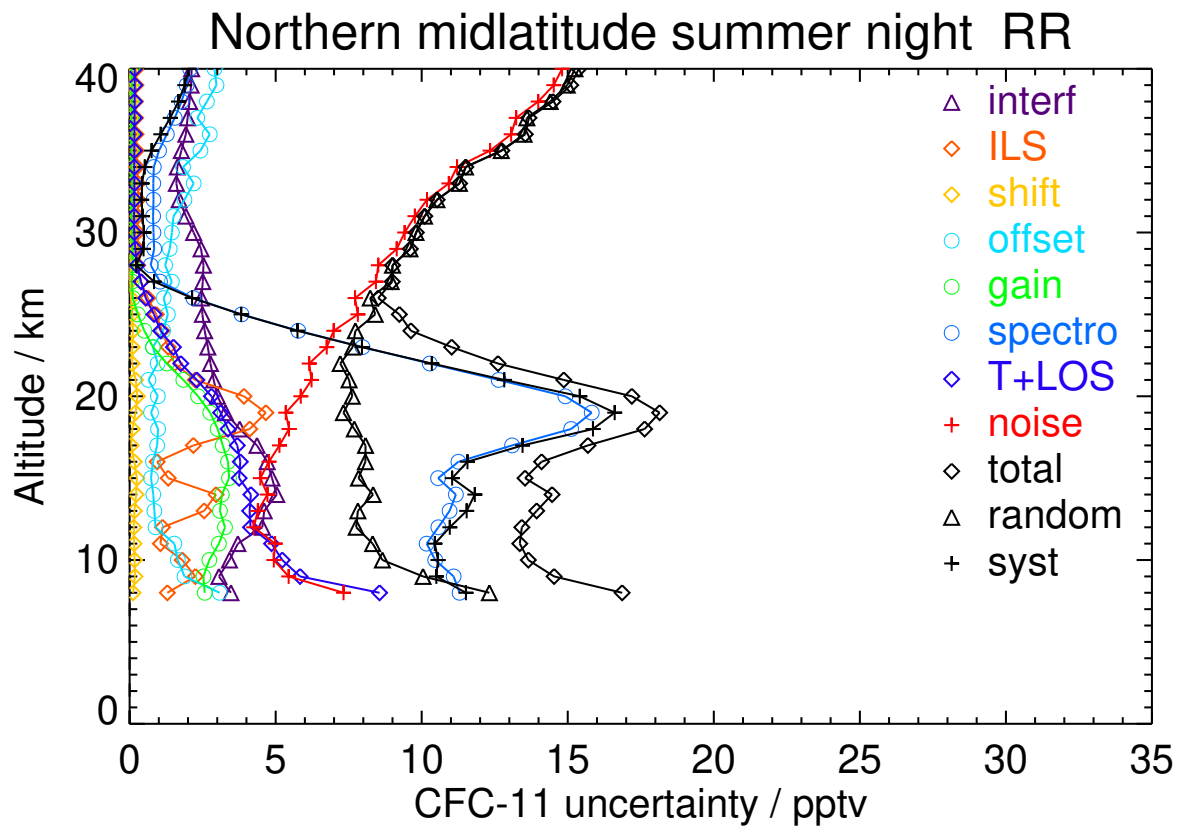

**Figure S48.** V8R\_F-11\_261 Northern midlatitude summer night

**Table S50.** CFC-11 error budget for Northern midlatitude autumn day. All uncertainties are  $1\sigma$ .

| altitude<br>(km) | mean target<br>(pptv) | interf<br>(pptv) | ILS<br>(pptv) | shift<br>(pptv) | offset<br>(pptv) | gain<br>(pptv) | spectro<br>(pptv) | T+LOS<br>(pptv) | noise<br>(pptv) | random<br>(pptv) | syst<br>(pptv) | total<br>(pptv) |
|------------------|-----------------------|------------------|---------------|-----------------|------------------|----------------|-------------------|-----------------|-----------------|------------------|----------------|-----------------|
| 8                | 240.75                | 2.95             | 2.07          | 0.75            | 2.79             | 2.07           | 10.50             | 8.36            | 7.79            | 12.81            | 10.11          | 16.32           |
| 11               | 244.77                | 4.62             | 0.80          | 0.22            | 1.03             | 3.52           | 10.27             | 4.34            | 4.79            | 8.31             | 10.66          | 13.52           |
| 14               | 248.18                | 4.98             | 2.52          | 0.27            | 1.53             | 3.15           | 11.94             | 3.93            | 4.78            | 8.34             | 12.44          | 14.98           |
| 17               | 224.07                | 4.07             | 2.35          | 0.15            | 1.22             | 3.19           | 13.95             | 3.82            | 5.55            | 8.26             | 14.34          | 16.55           |
| 20               | 141.18                | 3.00             | 4.31          | 0.36            | 1.10             | 2.57           | 15.93             | 2.93            | 6.28            | 8.04             | 16.51          | 18.37           |
| 23               | 49.03                 | 2.61             | 1.26          | 0.06            | 0.88             | 0.76           | 7.78              | 1.44            | 7.41            | 8.43             | 7.50           | 11.28           |
| 26               | 14.18                 | 2.51             | 0.60          | 0.02            | 1.07             | 0.16           | 2.48              | 0.53            | 7.76            | 8.31             | 2.32           | 8.63            |
| 29               | 5.57                  | 2.21             | 0.34          | 0.07            | 1.51             | 0.05           | 0.89              | 0.25            | 9.97            | 10.36            | 0.53           | 10.37           |
| 32               | 6.92                  | 1.76             | 0.25          | 0.08            | 1.95             | 0.06           | 0.71              | 0.18            | 11.02           | 11.35            | 0.29           | 11.36           |
| 35               | 0.81                  | 1.52             | 0.14          | 0.05            | 2.51             | 0.07           | 1.06              | 0.15            | 13.30           | 13.63            | 0.92           | 13.66           |
| 38               | 3.10                  | 1.56             | 0.22          | 0.02            | 2.92             | 0.09           | 1.83              | 0.16            | 15.22           | 15.59            | 1.77           | 15.69           |
| 41               | 4.82                  | 2.14             | 0.38          | 0.02            | 4.27             | 0.16           | 2.36              | 0.19            | 16.71           | 17.39            | 2.35           | 17.55           |

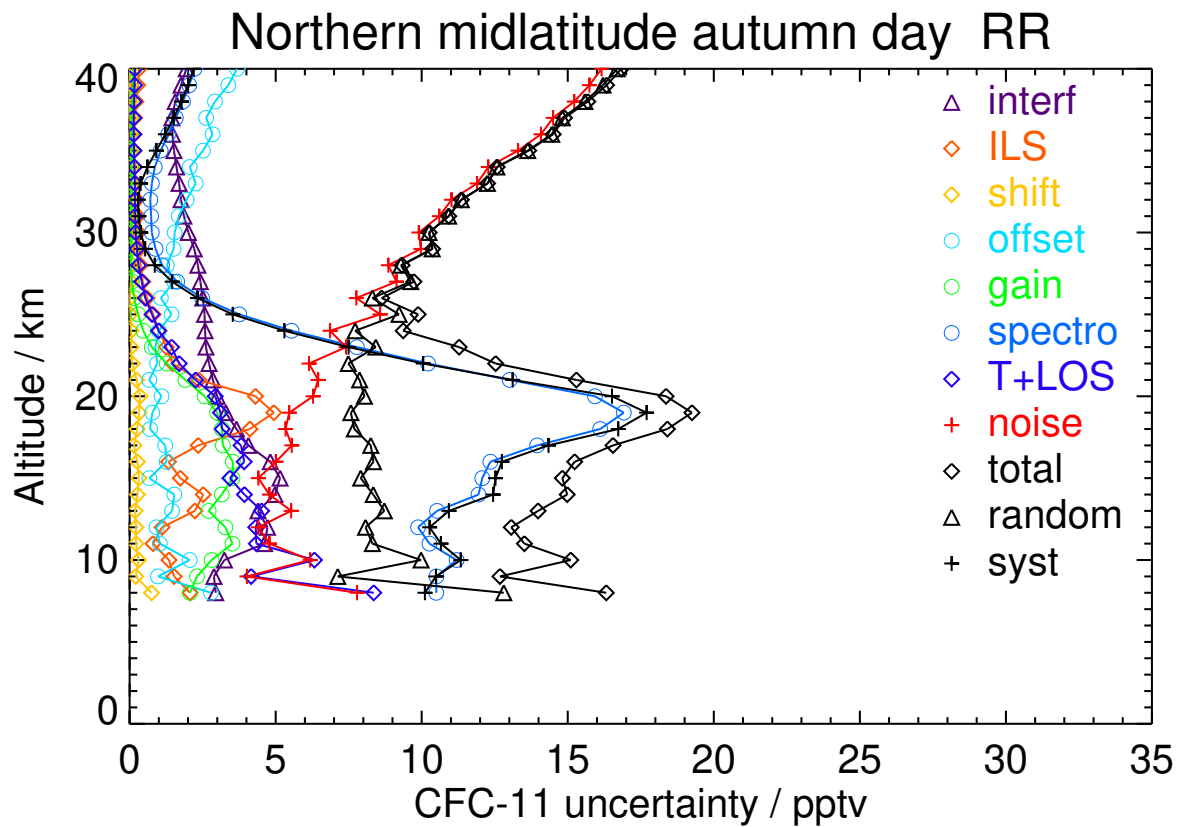

**Figure S49.** V8R\_F-11\_261 Northern midlatitude autumn day

**Table S51.** CFC-11 error budget for Northern midlatitude autumn night. All uncertainties are  $1\sigma$ .

| altitude<br>(km) | mean target<br>(pptv) | interf<br>(pptv) | ILS<br>(pptv) | shift<br>(pptv) | offset<br>(pptv) | gain<br>(pptv) | spectro<br>(pptv) | T+LOS<br>(pptv) | noise<br>(pptv) | random<br>(pptv) | syst<br>(pptv) | total<br>(pptv) |
|------------------|-----------------------|------------------|---------------|-----------------|------------------|----------------|-------------------|-----------------|-----------------|------------------|----------------|-----------------|
| 8                | 242.81                | 3.04             | 1.41          | 0.18            | 2.70             | 2.31           | 10.84             | 7.97            | 7.05            | 12.17            | 10.31          | 15.95           |
| 11               | 243.28                | 4.61             | 1.34          | 0.21            | 0.99             | 3.62           | 10.88             | 4.41            | 4.52            | 8.33             | 11.23          | 13.98           |
| 14               | 243.68                | 5.12             | 2.68          | 0.28            | 0.94             | 3.23           | 11.85             | 3.92            | 4.69            | 8.31             | 12.39          | 14.92           |
| 17               | 214.42                | 3.94             | 2.62          | 0.15            | 1.06             | 3.08           | 13.86             | 3.67            | 5.35            | 8.02             | 14.24          | 16.35           |
| 20               | 126.96                | 2.98             | 3.85          | 0.33            | 0.99             | 2.34           | 14.58             | 2.70            | 6.10            | 7.85             | 15.02          | 16.95           |
| 23               | 43.98                 | 2.63             | 1.31          | 0.06            | 0.93             | 0.75           | 7.55              | 1.35            | 7.19            | 8.44             | 7.03           | 10.98           |
| 26               | 7.94                  | 2.52             | 0.56          | 0.02            | 1.16             | 0.15           | 2.10              | 0.48            | 7.94            | 8.53             | 1.67           | 8.70            |
| 29               | 6.70                  | 2.21             | 0.35          | 0.07            | 1.51             | 0.05           | 0.87              | 0.24            | 9.86            | 10.25            | 0.56           | 10.26           |
| 32               | 3.65                  | 1.75             | 0.27          | 0.07            | 1.97             | 0.06           | 0.59              | 0.17            | 11.03           | 11.35            | 0.31           | 11.36           |
| 35               | 4.85                  | 1.47             | 0.13          | 0.04            | 2.54             | 0.05           | 1.10              | 0.13            | 13.27           | 13.60            | 1.01           | 13.64           |
| 38               | 7.23                  | 1.52             | 0.22          | 0.02            | 2.85             | 0.08           | 1.85              | 0.15            | 15.11           | 15.46            | 1.80           | 15.56           |
| 41               | 8.10                  | 2.17             | 0.38          | 0.02            | 4.12             | 0.13           | 2.29              | 0.18            | 16.54           | 17.19            | 2.27           | 17.34           |

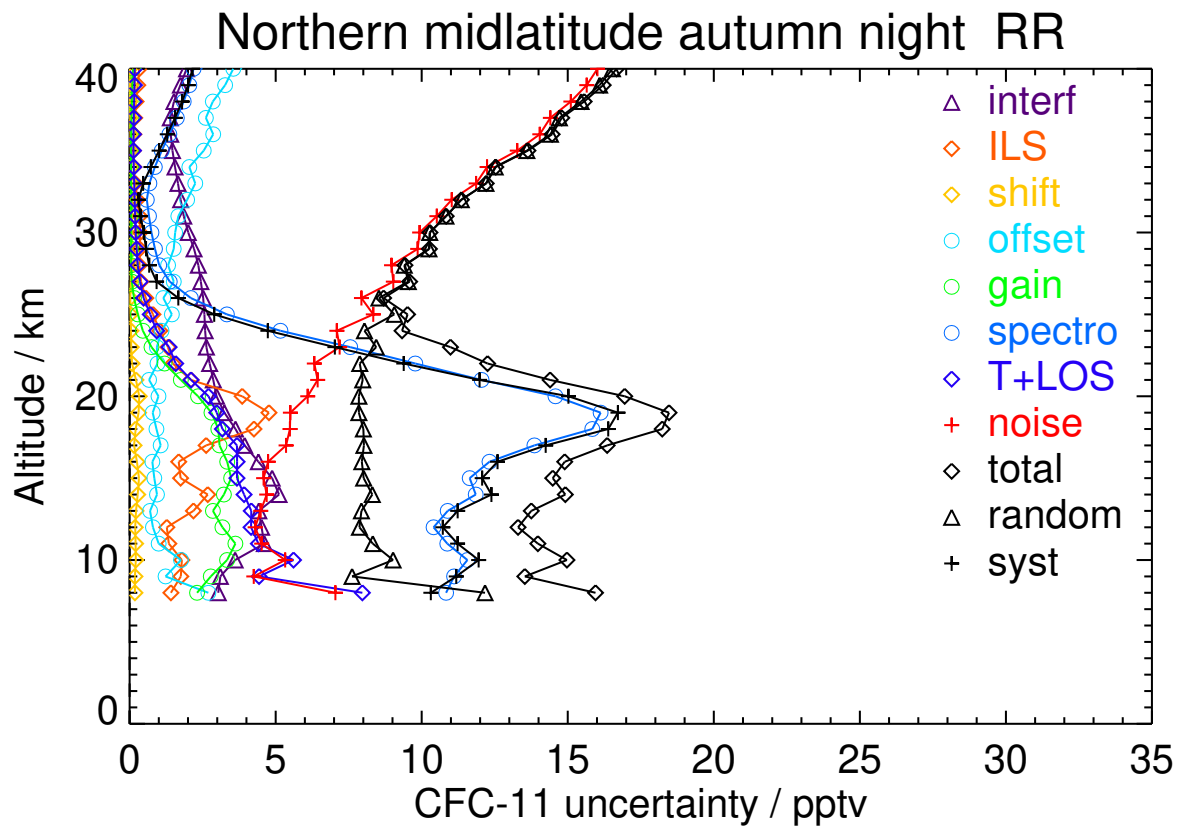

**Figure S50.** V8R\_F-11\_261 Northern midlatitude autumn night

Table S52. CFC-11 error budget for Tropics day. All uncertainties are  $1\sigma$ .

| altitude<br>(km) | mean target<br>(pptv) | interf<br>(pptv) | ILS<br>(pptv) | shift<br>(pptv) | offset<br>(pptv) | gain<br>(pptv) | spectro<br>(pptv) | T+LOS<br>(pptv) | noise<br>(pptv) | random<br>(pptv) | syst<br>(pptv) | total<br>(pptv) |
|------------------|-----------------------|------------------|---------------|-----------------|------------------|----------------|-------------------|-----------------|-----------------|------------------|----------------|-----------------|
| 11               | 245.06                | 3.12             | 1.62          | 0.12            | 2.16             | 2.34           | 11.27             | 6.27            | 6.31            | 10.33            | 11.04          | 15.12           |
| 14               | 251.33                | 4.92             | 1.63          | 0.18            | 1.11             | 2.88           | 9.97              | 4.08            | 5.37            | 8.73             | 10.25          | 13.47           |
| 17               | 241.14                | 5.02             | 2.09          | 0.07            | 1.04             | 3.31           | 13.18             | 4.31            | 5.64            | 9.01             | 13.58          | 16.30           |
| 20               | 201.26                | 3.23             | 3.63          | 0.21            | 0.69             | 2.13           | 13.86             | 2.66            | 6.24            | 7.95             | 14.27          | 16.33           |
| 23               | 123.52                | 2.60             | 1.96          | 0.27            | 0.88             | 1.24           | 11.76             | 2.03            | 6.93            | 7.93             | 11.86          | 14.26           |
| 26               | 62.76                 | 2.52             | 2.21          | 0.08            | 1.15             | 0.35           | 7.14              | 1.18            | 7.76            | 8.79             | 6.92           | 11.19           |
| 29               | 20.90                 | 2.52             | 1.69          | 0.22            | 1.49             | 0.14           | 2.92              | 0.62            | 9.35            | 9.94             | 2.99           | 10.38           |
| 32               | 3.79                  | 1.75             | 0.51          | 0.13            | 1.65             | 0.05           | 0.70              | 0.25            | 10.48           | 10.78            | 0.47           | 10.79           |
| 35               | 4.03                  | 1.61             | 0.13          | 0.07            | 2.20             | 0.05           | 1.17              | 0.16            | 11.91           | 12.23            | 1.08           | 12.27           |
| 38               | 1.11                  | 1.88             | 0.10          | 0.04            | 2.87             | 0.06           | 1.59              | 0.19            | 13.86           | 14.28            | 1.53           | 14.36           |
| 41               | 2.93                  | 2.07             | 0.15          | 0.03            | 3.56             | 0.07           | 1.82              | 0.21            | 15.51           | 16.06            | 1.76           | 16.15           |

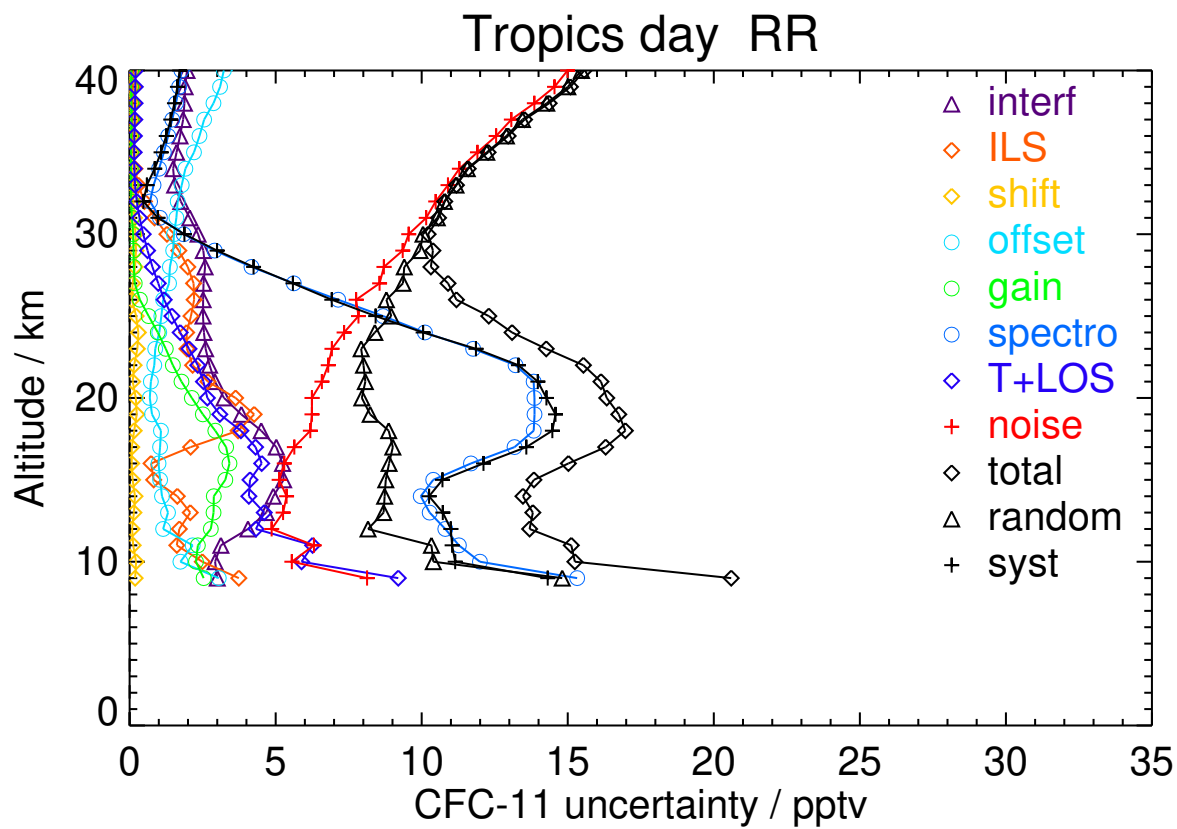

Figure S51. V8R\_F-11\_261 Tropics day

Table S53. CFC-11 error budget for Tropics night. All uncertainties are  $1\sigma$ .

| altitude<br>(km) | mean target<br>(pptv) | interf<br>(pptv) | ILS<br>(pptv) | shift<br>(pptv) | offset<br>(pptv) | gain<br>(pptv) | spectro<br>(pptv) | T+LOS<br>(pptv) | noise<br>(pptv) | random<br>(pptv) | syst<br>(pptv) | total<br>(pptv) |
|------------------|-----------------------|------------------|---------------|-----------------|------------------|----------------|-------------------|-----------------|-----------------|------------------|----------------|-----------------|
| 11               | 244.44                | 3.11             | 2.06          | 0.24            | 1.96             | 2.37           | 11.35             | 5.91            | 5.88            | 9.85             | 11.17          | 14.89           |
| 14               | 256.33                | 4.94             | 1.23          | 0.25            | 1.18             | 3.00           | 10.14             | 4.13            | 5.42            | 8.70             | 10.48          | 13.62           |
| 17               | 238.26                | 5.08             | 1.79          | 0.12            | 1.17             | 3.42           | 12.38             | 4.48            | 5.75            | 9.16             | 12.83          | 15.76           |
| 20               | 199.10                | 3.24             | 3.63          | 0.17            | 0.69             | 2.28           | 14.14             | 2.78            | 6.35            | 7.94             | 14.64          | 16.66           |
| 23               | 117.19                | 2.61             | 1.92          | 0.27            | 0.88             | 1.13           | 11.04             | 2.05            | 7.00            | 8.07             | 11.07          | 13.70           |
| 26               | 60.33                 | 2.50             | 1.98          | 0.04            | 1.11             | 0.41           | 6.56              | 1.15            | 7.81            | 8.62             | 6.54           | 10.82           |
| 29               | 21.19                 | 2.51             | 1.42          | 0.20            | 1.45             | 0.08           | 2.61              | 0.59            | 9.29            | 9.82             | 2.73           | 10.20           |
| 32               | 4.81                  | 1.76             | 0.48          | 0.12            | 1.64             | 0.04           | 0.72              | 0.25            | 10.58           | 10.88            | 0.46           | 10.89           |
| 35               | 1.26                  | 1.53             | 0.14          | 0.05            | 2.18             | 0.06           | 1.25              | 0.16            | 11.96           | 12.27            | 1.13           | 12.32           |
| 38               | 6.34                  | 1.86             | 0.14          | 0.02            | 2.83             | 0.07           | 1.60              | 0.20            | 13.94           | 14.35            | 1.52           | 14.43           |
| 41               | 10.17                 | 2.07             | 0.17          | 0.02            | 3.55             | 0.08           | 1.67              | 0.21            | 15.67           | 16.21            | 1.58           | 16.29           |

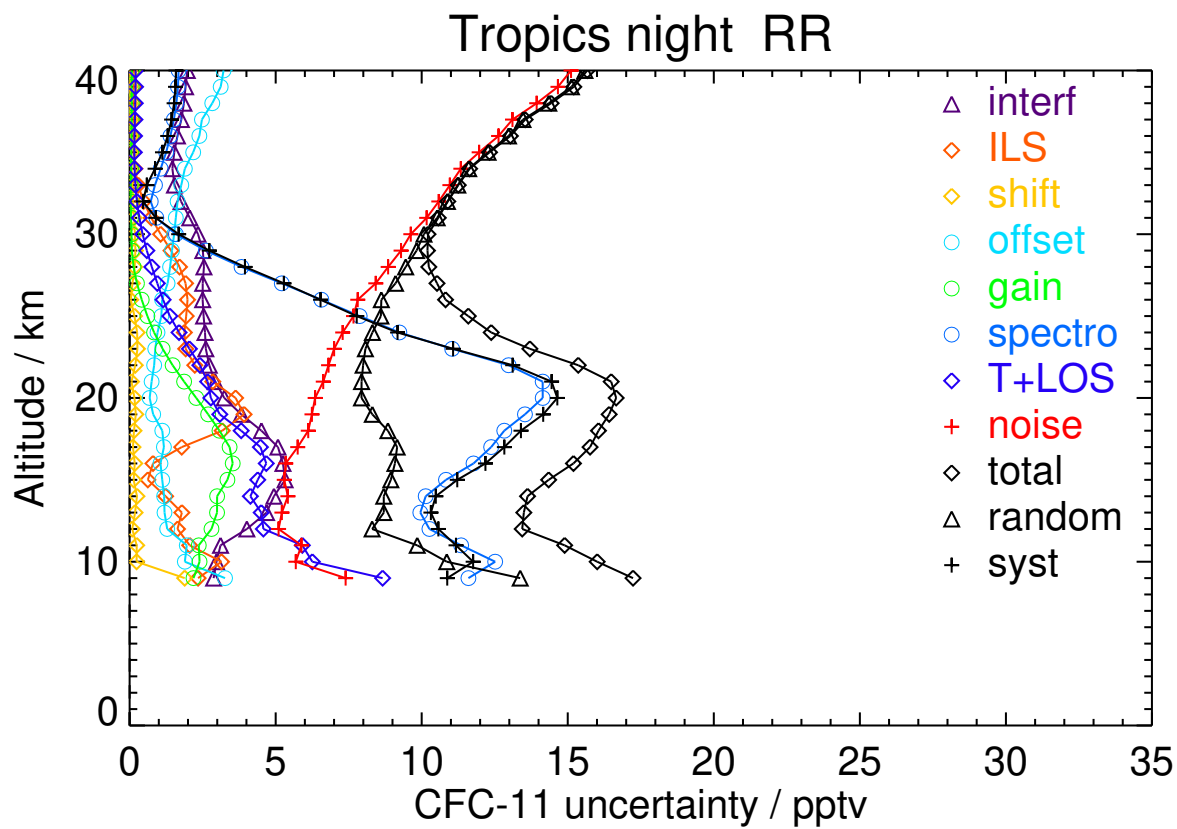

Figure S52. V8R\_F-11\_261 Tropics night

**Table S54.** CFC-11 error budget for Southern midlatitude winter day. All uncertainties are  $1\sigma$ .

| altitude<br>(km) | mean target<br>(pptv) | interf<br>(pptv) | ILS<br>(pptv) | shift<br>(pptv) | offset<br>(pptv) | gain<br>(pptv) | spectro<br>(pptv) | T+LOS<br>(pptv) | noise<br>(pptv) | random<br>(pptv) | syst<br>(pptv) | total<br>(pptv) |
|------------------|-----------------------|------------------|---------------|-----------------|------------------|----------------|-------------------|-----------------|-----------------|------------------|----------------|-----------------|
| 8                | 241.41                | 3.77             | 0.99          | 0.21            | 1.59             | 3.41           | 11.64             | 5.91            | 5.08            | 9.62             | 11.54          | 15.03           |
| 11               | 228.43                | 3.94             | 2.18          | 0.26            | 1.07             | 3.16           | 12.06             | 4.53            | 4.51            | 8.03             | 12.38          | 14.75           |
| 14               | 201.04                | 4.41             | 3.24          | 0.28            | 1.11             | 2.91           | 12.62             | 3.67            | 4.43            | 7.86             | 13.05          | 15.24           |
| 17               | 141.52                | 3.89             | 2.52          | 0.14            | 0.91             | 2.77           | 12.98             | 2.89            | 5.21            | 7.67             | 13.24          | 15.30           |
| 20               | 68.66                 | 3.01             | 1.72          | 0.16            | 0.88             | 1.62           | 8.78              | 1.79            | 6.31            | 7.77             | 8.66           | 11.64           |
| 23               | 23.74                 | 2.68             | 0.50          | 0.05            | 1.02             | 0.53           | 4.13              | 0.81            | 7.43            | 8.29             | 3.59           | 9.03            |
| 26               | 8.04                  | 2.50             | 0.33          | 0.04            | 1.53             | 0.24           | 2.08              | 0.43            | 9.48            | 10.01            | 1.75           | 10.16           |
| 29               | 1.83                  | 2.17             | 0.27          | 0.07            | 1.90             | 0.11           | 1.17              | 0.31            | 11.36           | 11.74            | 1.05           | 11.79           |
| 32               | 1.42                  | 1.56             | 0.17          | 0.05            | 2.53             | 0.13           | 0.62              | 0.19            | 13.44           | 13.78            | 0.29           | 13.78           |
| 35               | 5.00                  | 1.27             | 0.14          | 0.03            | 3.30             | 0.18           | 1.35              | 0.19            | 15.81           | 16.21            | 1.19           | 16.26           |
| 38               | 8.57                  | 1.43             | 0.28          | 0.01            | 4.55             | 0.17           | 2.15              | 0.22            | 17.88           | 18.52            | 2.04           | 18.63           |
| 41               | 9.62                  | 2.23             | 0.39          | 0.02            | 7.09             | 0.20           | 2.73              | 0.24            | 19.26           | 20.66            | 2.65           | 20.83           |

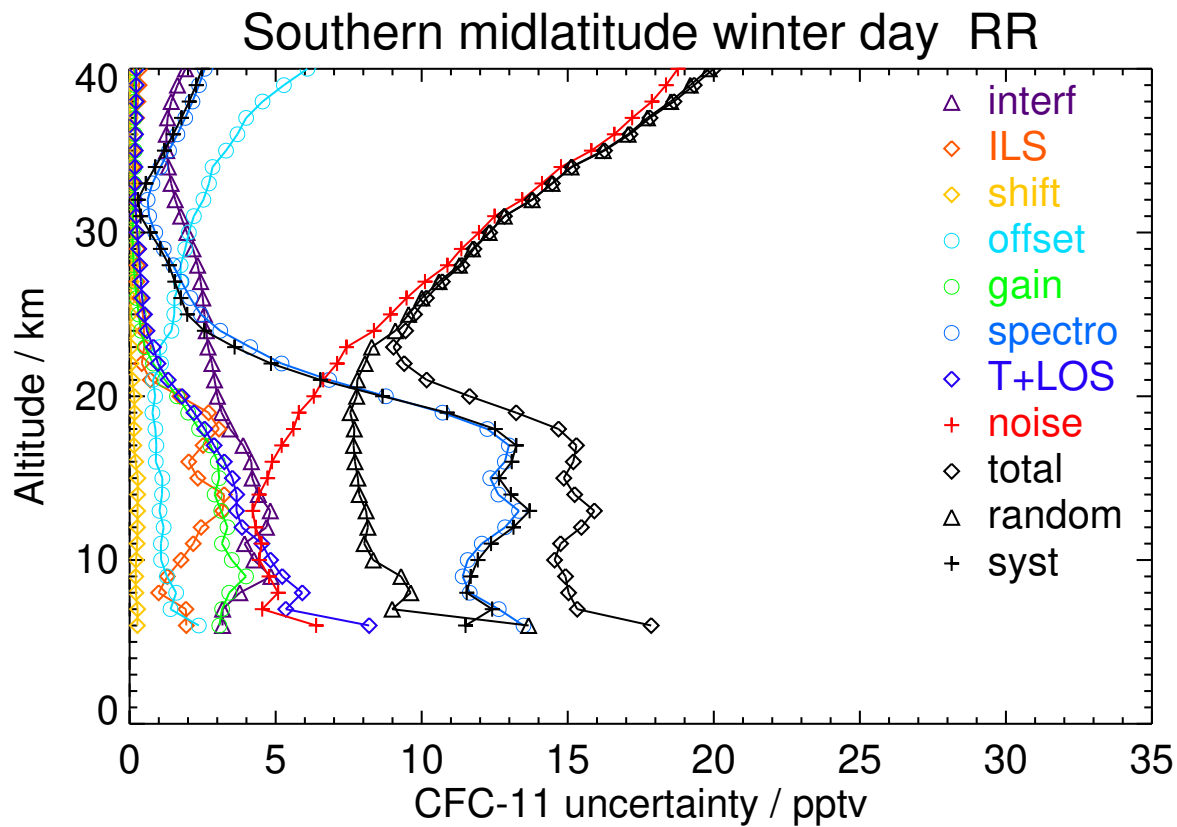

**Figure S53.** V8R\_F-11\_261 Southern midlatitude winter day

**Table S55.** CFC-11 error budget for Southern midlatitude winter night. All uncertainties are  $1\sigma$ .

| altitude<br>(km) | mean target<br>(pptv) | interf<br>(pptv) | ILS<br>(pptv) | shift<br>(pptv) | offset<br>(pptv) | gain<br>(pptv) | spectro<br>(pptv) | T+LOS<br>(pptv) | noise<br>(pptv) | random<br>(pptv) | syst<br>(pptv) | total<br>(pptv) |
|------------------|-----------------------|------------------|---------------|-----------------|------------------|----------------|-------------------|-----------------|-----------------|------------------|----------------|-----------------|
| 8                | 245.30                | 3.39             | 1.15          | 0.18            | 1.58             | 3.20           | 9.93              | 5.93            | 5.27            | 9.20             | 10.12          | 13.68           |
| 11               | 232.25                | 3.70             | 1.87          | 0.22            | 1.70             | 2.86           | 11.44             | 5.04            | 5.19            | 8.76             | 11.61          | 14.54           |
| 14               | 203.43                | 4.48             | 3.22          | 0.30            | 1.47             | 2.68           | 12.02             | 3.77            | 4.68            | 7.99             | 12.51          | 14.85           |
| 17               | 147.16                | 3.80             | 2.71          | 0.16            | 0.99             | 2.53           | 12.80             | 2.96            | 5.29            | 7.75             | 13.03          | 15.16           |
| 20               | 75.80                 | 2.98             | 2.14          | 0.19            | 1.00             | 1.53           | 9.15              | 1.98            | 6.33            | 7.89             | 9.07           | 12.02           |
| 23               | 21.92                 | 2.69             | 0.41          | 0.07            | 1.09             | 0.44           | 4.34              | 0.88            | 7.77            | 8.50             | 4.07           | 9.42            |
| 26               | 1.28                  | 2.53             | 0.21          | 0.03            | 1.47             | 0.14           | 1.47              | 0.39            | 9.04            | 9.55             | 1.17           | 9.62            |
| 29               | 3.56                  | 2.16             | 0.18          | 0.06            | 1.88             | 0.10           | 0.92              | 0.25            | 11.63           | 11.99            | 0.85           | 12.02           |
| 32               | 3.59                  | 1.59             | 0.20          | 0.06            | 2.37             | 0.10           | 0.68              | 0.20            | 13.07           | 13.39            | 0.26           | 13.39           |
| 35               | 3.93                  | 1.29             | 0.12          | 0.03            | 3.05             | 0.09           | 1.23              | 0.17            | 15.18           | 15.55            | 1.13           | 15.59           |
| 38               | 3.00                  | 1.58             | 0.20          | 0.02            | 4.40             | 0.09           | 2.01              | 0.19            | 17.28           | 17.91            | 1.95           | 18.02           |
| 41               | 2.10                  | 2.40             | 0.30          | 0.02            | 6.95             | 0.17           | 2.53              | 0.22            | 18.87           | 20.26            | 2.47           | 20.41           |

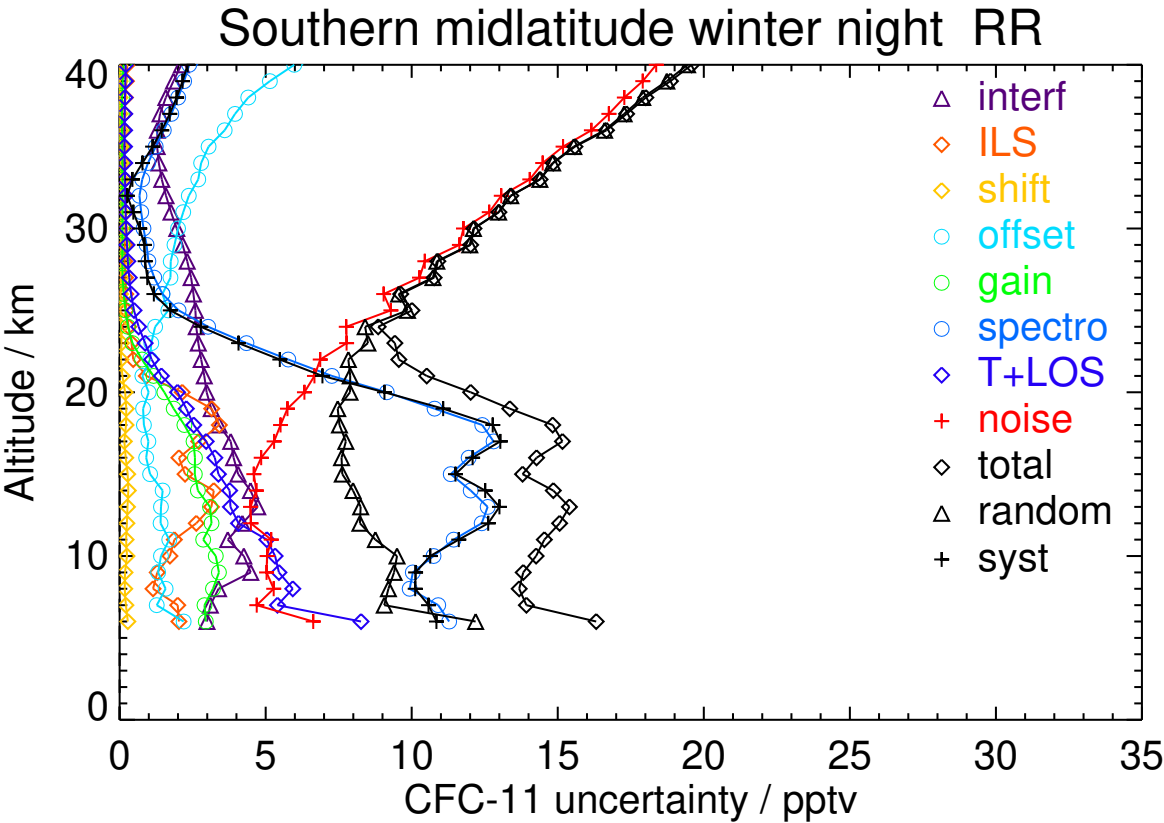

**Figure S54.** V8R\_F-11\_261 Southern midlatitude winter night



**Table S56.** CFC-11 error budget for Southern midlatitude spring day. All uncertainties are  $1\sigma$ .

| altitude<br>(km) | mean target<br>(pptv) | interf<br>(pptv) | ILS<br>(pptv) | shift<br>(pptv) | offset<br>(pptv) | gain<br>(pptv) | spectro<br>(pptv) | T+LOS<br>(pptv) | noise<br>(pptv) | random<br>(pptv) | syst<br>(pptv) | total<br>(pptv) |
|------------------|-----------------------|------------------|---------------|-----------------|------------------|----------------|-------------------|-----------------|-----------------|------------------|----------------|-----------------|
| 8                | 244.52                | 3.77             | 1.78          | 0.21            | 1.73             | 3.40           | 11.27             | 6.05            | 5.43            | 9.84             | 11.33          | 15.00           |
| 11               | 222.51                | 4.01             | 3.81          | 0.26            | 1.18             | 3.07           | 13.17             | 4.46            | 4.60            | 8.59             | 13.50          | 16.00           |
| 14               | 191.18                | 4.78             | 5.06          | 0.23            | 1.20             | 2.46           | 12.82             | 3.70            | 4.47            | 10.02            | 12.40          | 15.94           |
| 17               | 124.99                | 4.00             | 3.78          | 0.12            | 1.02             | 2.52           | 13.89             | 2.83            | 5.04            | 9.88             | 12.90          | 16.25           |
| 20               | 47.99                 | 2.94             | 1.70          | 0.13            | 0.83             | 1.30           | 7.45              | 1.51            | 5.64            | 8.17             | 6.06           | 10.18           |
| 23               | 25.31                 | 2.68             | 0.36          | 0.05            | 0.73             | 0.32           | 2.51              | 0.69            | 6.62            | 7.34             | 2.14           | 7.65            |
| 26               | 16.63                 | 2.64             | 0.24          | 0.02            | 1.19             | 0.15           | 1.55              | 0.35            | 7.80            | 8.39             | 1.22           | 8.47            |
| 29               | 8.45                  | 2.45             | 0.35          | 0.06            | 1.46             | 0.07           | 0.83              | 0.23            | 9.45            | 9.91             | 0.45           | 9.92            |
| 32               | 7.08                  | 1.78             | 0.27          | 0.07            | 1.88             | 0.08           | 0.78              | 0.16            | 10.66           | 10.99            | 0.39           | 11.00           |
| 35               | 6.78                  | 1.53             | 0.12          | 0.04            | 2.46             | 0.13           | 1.07              | 0.15            | 12.97           | 13.30            | 0.86           | 13.33           |
| 38               | 8.04                  | 1.78             | 0.09          | 0.02            | 2.67             | 0.14           | 1.61              | 0.16            | 14.70           | 15.06            | 1.45           | 15.13           |
| 41               | 3.17                  | 2.46             | 0.22          | 0.02            | 3.69             | 0.16           | 2.01              | 0.17            | 16.22           | 16.83            | 1.92           | 16.94           |

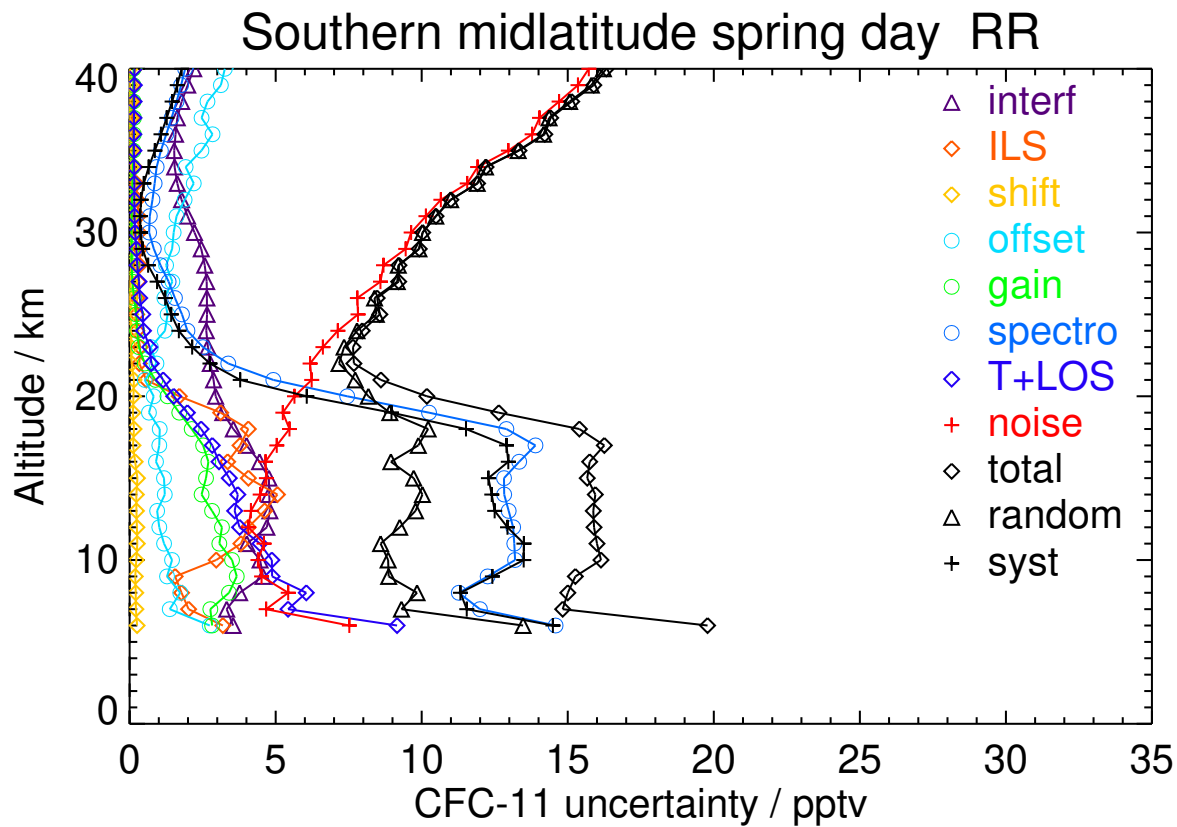

**Figure S55.** V8R\_F-11\_261 Southern midlatitude spring day

**Table S57.** CFC-11 error budget for Southern midlatitude spring night. All uncertainties are  $1\sigma$ .

| altitude<br>(km) | mean target<br>(pptv) | interf<br>(pptv) | ILS<br>(pptv) | shift<br>(pptv) | offset<br>(pptv) | gain<br>(pptv) | spectro<br>(pptv) | T+LOS<br>(pptv) | noise<br>(pptv) | random<br>(pptv) | syst<br>(pptv) | total<br>(pptv) |
|------------------|-----------------------|------------------|---------------|-----------------|------------------|----------------|-------------------|-----------------|-----------------|------------------|----------------|-----------------|
| 8                | 248.37                | 3.45             | 1.78          | 0.16            | 1.45             | 3.33           | 10.32             | 5.83            | 5.07            | 9.45             | 10.26          | 13.95           |
| 11               | 225.16                | 3.87             | 2.66          | 0.24            | 1.39             | 3.00           | 10.94             | 4.71            | 4.99            | 8.69             | 11.15          | 14.13           |
| 14               | 205.47                | 5.11             | 4.62          | 0.28            | 1.30             | 3.04           | 13.30             | 3.78            | 4.54            | 8.90             | 13.83          | 16.45           |
| 17               | 125.40                | 4.29             | 4.11          | 0.12            | 0.88             | 2.67           | 14.07             | 2.93            | 5.16            | 8.63             | 14.20          | 16.62           |
| 20               | 34.65                 | 3.05             | 1.85          | 0.15            | 0.89             | 1.35           | 7.11              | 1.48            | 5.97            | 8.51             | 5.59           | 10.19           |
| 23               | 24.64                 | 2.74             | 0.42          | 0.03            | 0.79             | 0.33           | 2.12              | 0.60            | 6.91            | 7.65             | 1.60           | 7.81            |
| 26               | 11.52                 | 2.59             | 0.47          | 0.03            | 1.17             | 0.17           | 1.55              | 0.36            | 7.85            | 8.41             | 1.33           | 8.51            |
| 29               | 9.81                  | 2.51             | 0.38          | 0.06            | 1.42             | 0.07           | 0.85              | 0.21            | 9.48            | 9.94             | 0.44           | 9.95            |
| 32               | 9.16                  | 2.00             | 0.27          | 0.06            | 1.86             | 0.07           | 0.77              | 0.16            | 10.50           | 10.87            | 0.52           | 10.88           |
| 35               | 6.30                  | 1.87             | 0.15          | 0.04            | 2.38             | 0.10           | 1.02              | 0.15            | 12.77           | 13.13            | 0.86           | 13.16           |
| 38               | 6.00                  | 2.02             | 0.16          | 0.03            | 2.67             | 0.13           | 1.49              | 0.16            | 14.58           | 14.97            | 1.39           | 15.04           |
| 41               | 4.08                  | 2.57             | 0.26          | 0.02            | 3.67             | 0.17           | 1.84              | 0.17            | 16.13           | 16.76            | 1.74           | 16.85           |

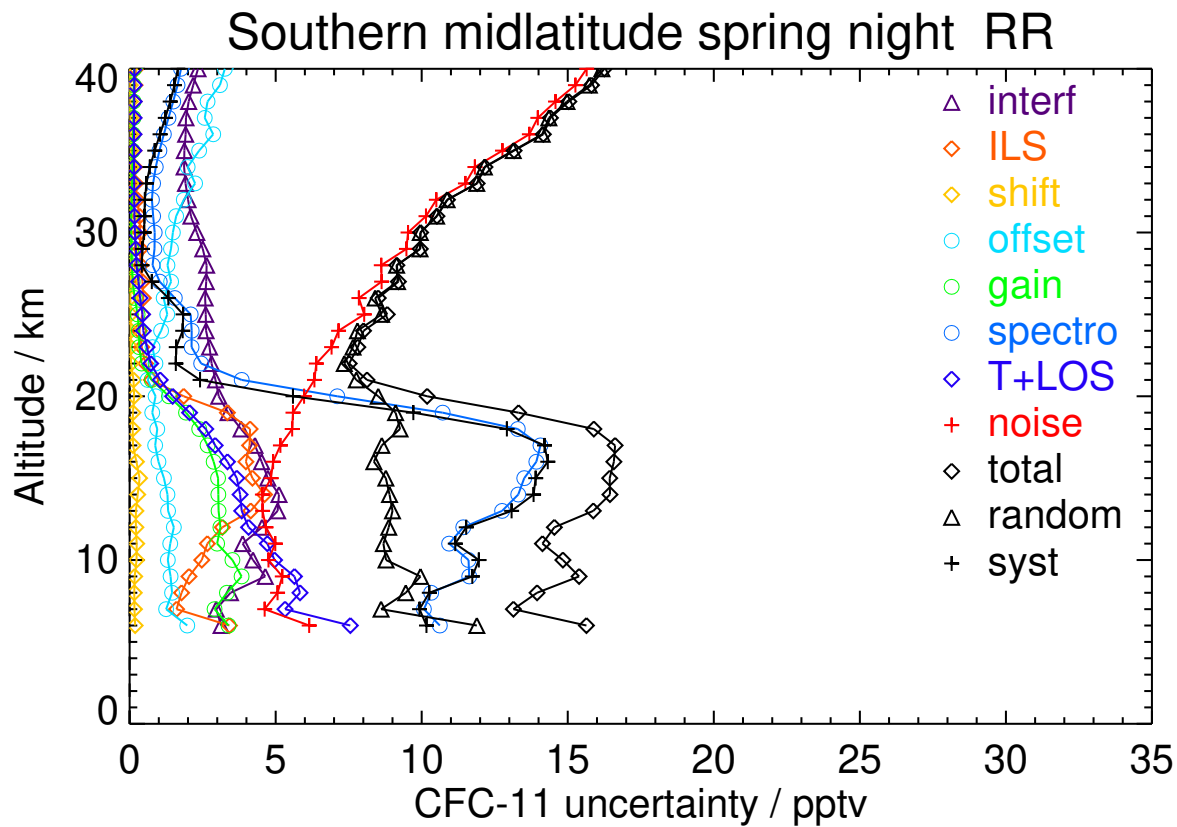

**Figure S56.** V8R\_F-11\_261 Southern midlatitude spring night

**Table S58.** CFC-11 error budget for Southern midlatitude summer day. All uncertainties are  $1\sigma$ .

| altitude<br>(km) | mean target<br>(pptv) | interf<br>(pptv) | ILS<br>(pptv) | shift<br>(pptv) | offset<br>(pptv) | gain<br>(pptv) | spectro<br>(pptv) | T+LOS<br>(pptv) | noise<br>(pptv) | random<br>(pptv) | syst<br>(pptv) | total<br>(pptv) |
|------------------|-----------------------|------------------|---------------|-----------------|------------------|----------------|-------------------|-----------------|-----------------|------------------|----------------|-----------------|
| 8                | 240.43                | 3.50             | 1.62          | 0.25            | 1.56             | 3.11           | 11.06             | 5.61            | 4.84            | 9.17             | 10.96          | 14.29           |
| 11               | 228.52                | 3.88             | 3.42          | 0.25            | 1.04             | 3.26           | 12.18             | 4.42            | 4.29            | 8.39             | 12.43          | 15.00           |
| 14               | 202.19                | 4.58             | 4.63          | 0.23            | 1.27             | 2.48           | 11.53             | 3.59            | 4.37            | 9.35             | 11.30          | 14.67           |
| 17               | 165.57                | 4.17             | 3.62          | 0.09            | 1.21             | 2.63           | 13.22             | 3.25            | 5.10            | 8.74             | 13.18          | 15.82           |
| 20               | 98.36                 | 3.08             | 3.16          | 0.21            | 0.97             | 1.64           | 11.31             | 2.23            | 5.74            | 9.38             | 10.05          | 13.74           |
| 23               | 37.27                 | 2.66             | 1.34          | 0.07            | 0.87             | 0.56           | 6.00              | 1.15            | 6.86            | 7.91             | 5.64           | 9.71            |
| 26               | 6.45                  | 2.60             | 0.39          | 0.04            | 1.08             | 0.11           | 1.38              | 0.41            | 7.24            | 7.85             | 1.00           | 7.91            |
| 29               | 7.71                  | 2.35             | 0.36          | 0.05            | 1.47             | 0.08           | 0.62              | 0.20            | 9.23            | 9.66             | 0.33           | 9.66            |
| 32               | 5.45                  | 1.82             | 0.32          | 0.08            | 1.62             | 0.05           | 0.67              | 0.15            | 9.62            | 9.94             | 0.41           | 9.95            |
| 35               | 9.65                  | 2.71             | 0.17          | 0.05            | 2.26             | 0.14           | 1.08              | 0.16            | 11.65           | 12.18            | 0.94           | 12.22           |
| 38               | 7.38                  | 2.53             | 0.13          | 0.03            | 2.48             | 0.09           | 1.46              | 0.15            | 13.21           | 13.68            | 1.40           | 13.75           |
| 41               | -1.52                 | 3.32             | 0.27          | 0.02            | 3.10             | 0.20           | 1.84              | 0.16            | 14.87           | 15.56            | 1.80           | 15.67           |

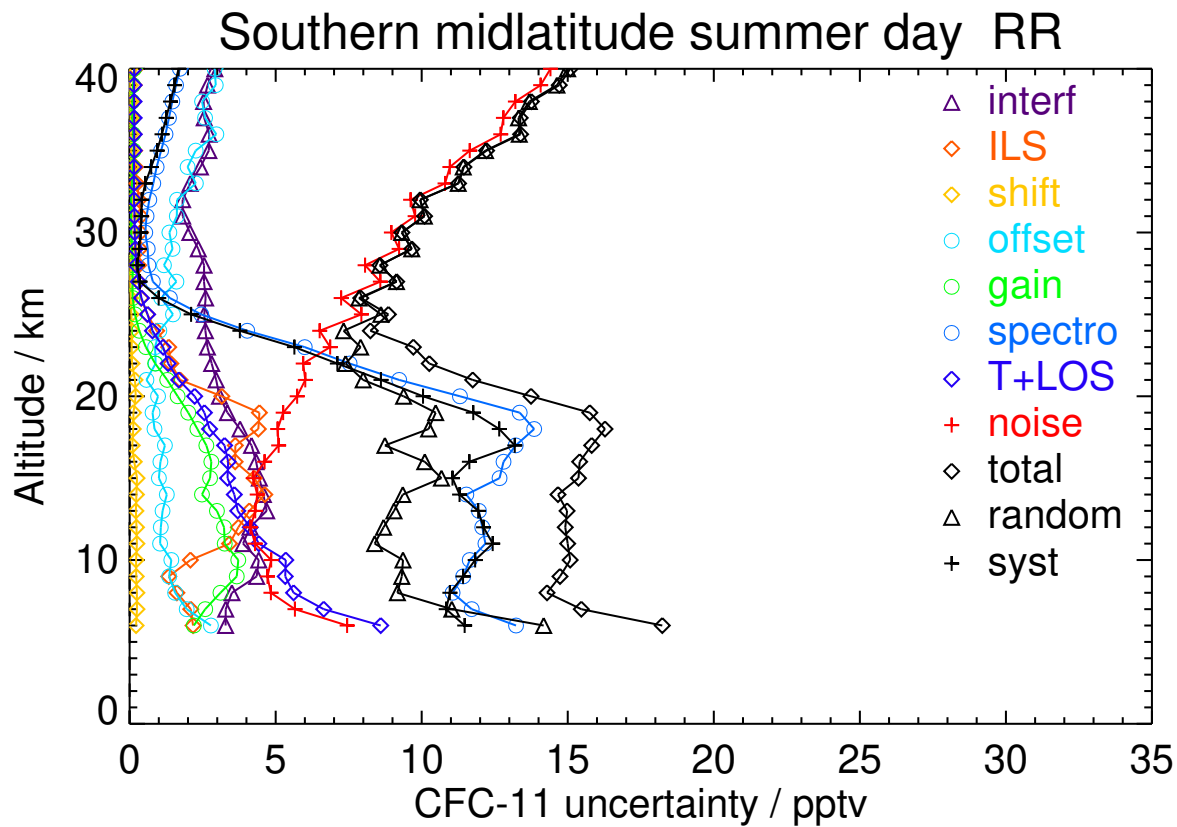

**Figure S57.** V8R\_F-11\_261 Southern midlatitude summer day

**Table S59.** CFC-11 error budget for Southern midlatitude summer night. All uncertainties are  $1\sigma$ .

| altitude<br>(km) | mean target<br>(pptv) | interf<br>(pptv) | ILS<br>(pptv) | shift<br>(pptv) | offset<br>(pptv) | gain<br>(pptv) | spectro<br>(pptv) | T+LOS<br>(pptv) | noise<br>(pptv) | random<br>(pptv) | syst<br>(pptv) | total<br>(pptv) |
|------------------|-----------------------|------------------|---------------|-----------------|------------------|----------------|-------------------|-----------------|-----------------|------------------|----------------|-----------------|
| 8                | 248.93                | 3.51             | 4.46          | 2.45            | 1.63             | 3.08           | 10.36             | 5.85            | 5.08            | 10.78            | 10.07          | 14.75           |
| 11               | 221.97                | 3.85             | 3.43          | 0.57            | 1.56             | 3.29           | 11.95             | 4.83            | 4.84            | 9.06             | 12.15          | 15.16           |
| 14               | 203.70                | 5.04             | 6.12          | 0.78            | 1.48             | 3.08           | 13.14             | 3.72            | 4.53            | 10.46            | 13.14          | 16.79           |
| 17               | 156.67                | 4.22             | 3.64          | 0.40            | 1.17             | 2.74           | 13.32             | 3.03            | 5.03            | 10.31            | 12.08          | 15.88           |
| 20               | 100.17                | 3.13             | 2.62          | 0.27            | 1.00             | 1.95           | 11.41             | 2.15            | 5.69            | 8.58             | 10.73          | 13.74           |
| 23               | 32.09                 | 2.67             | 1.26          | 0.10            | 0.90             | 0.63           | 5.32              | 1.08            | 6.81            | 7.98             | 4.72           | 9.27            |
| 26               | 9.31                  | 2.61             | 0.37          | 0.05            | 1.04             | 0.11           | 1.28              | 0.41            | 7.26            | 7.86             | 0.88           | 7.91            |
| 29               | 7.23                  | 2.33             | 0.44          | 0.05            | 1.43             | 0.08           | 0.73              | 0.22            | 9.11            | 9.55             | 0.42           | 9.56            |
| 32               | 3.77                  | 1.80             | 0.36          | 0.08            | 1.56             | 0.05           | 0.62              | 0.17            | 9.54            | 9.85             | 0.40           | 9.86            |
| 35               | 5.29                  | 2.57             | 0.22          | 0.05            | 2.10             | 0.17           | 1.15              | 0.15            | 11.48           | 11.96            | 1.04           | 12.01           |
| 38               | 8.44                  | 2.50             | 0.20          | 0.02            | 2.40             | 0.10           | 1.61              | 0.15            | 13.05           | 13.51            | 1.55           | 13.60           |
| 41               | 7.81                  | 3.41             | 0.35          | 0.02            | 3.08             | 0.21           | 1.81              | 0.17            | 14.64           | 15.35            | 1.79           | 15.46           |

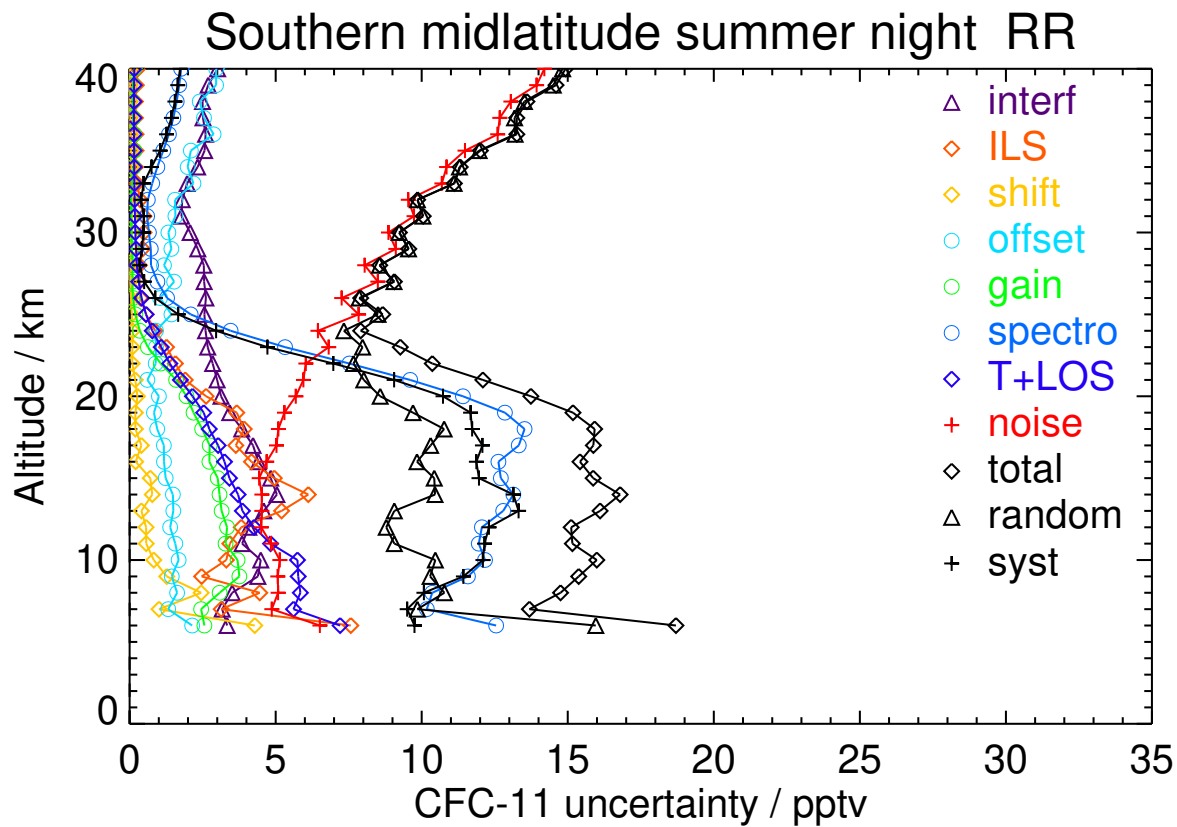

**Figure S58.** V8R\_F-11\_261 Southern midlatitude summer night

**Table S60.** CFC-11 error budget for Southern midlatitude autumn day. All uncertainties are  $1\sigma$ .

| altitude<br>(km) | mean target<br>(pptv) | interf<br>(pptv) | ILS<br>(pptv) | shift<br>(pptv) | offset<br>(pptv) | gain<br>(pptv) | spectro<br>(pptv) | T+LOS<br>(pptv) | noise<br>(pptv) | random<br>(pptv) | syst<br>(pptv) | total<br>(pptv) |
|------------------|-----------------------|------------------|---------------|-----------------|------------------|----------------|-------------------|-----------------|-----------------|------------------|----------------|-----------------|
| 8                | 239.53                | 3.69             | 1.52          | 0.24            | 1.51             | 3.80           | 11.59             | 5.87            | 4.94            | 9.12             | 11.95          | 15.03           |
| 11               | 228.64                | 3.66             | 1.72          | 0.20            | 0.85             | 2.98           | 10.31             | 4.15            | 4.11            | 7.46             | 10.52          | 12.90           |
| 14               | 215.35                | 4.53             | 3.40          | 0.27            | 0.97             | 3.06           | 11.70             | 3.54            | 4.23            | 7.97             | 12.09          | 14.49           |
| 17               | 163.95                | 3.96             | 3.10          | 0.11            | 0.84             | 2.99           | 13.79             | 2.99            | 4.95            | 7.57             | 14.18          | 16.08           |
| 20               | 84.58                 | 3.01             | 1.81          | 0.19            | 0.81             | 1.87           | 9.93              | 1.95            | 5.89            | 7.41             | 9.93           | 12.39           |
| 23               | 25.15                 | 2.68             | 0.80          | 0.08            | 0.84             | 0.69           | 4.87              | 0.94            | 6.82            | 7.92             | 4.18           | 8.95            |
| 26               | 10.08                 | 2.50             | 0.29          | 0.03            | 1.35             | 0.13           | 1.52              | 0.38            | 8.47            | 9.00             | 1.15           | 9.07            |
| 29               | 7.08                  | 2.21             | 0.29          | 0.07            | 1.61             | 0.10           | 1.01              | 0.26            | 9.91            | 10.30            | 0.86           | 10.34           |
| 32               | 7.00                  | 1.61             | 0.22          | 0.07            | 2.16             | 0.09           | 0.70              | 0.18            | 11.62           | 11.95            | 0.31           | 11.95           |
| 35               | 7.45                  | 1.40             | 0.09          | 0.03            | 2.69             | 0.08           | 1.03              | 0.15            | 13.88           | 14.22            | 0.89           | 14.24           |
| 38               | 1.48                  | 1.42             | 0.18          | 0.02            | 3.20             | 0.08           | 1.84              | 0.17            | 15.81           | 16.20            | 1.75           | 16.29           |
| 41               | 1.62                  | 1.87             | 0.30          | 0.02            | 4.95             | 0.12           | 2.46              | 0.18            | 17.34           | 18.14            | 2.43           | 18.30           |

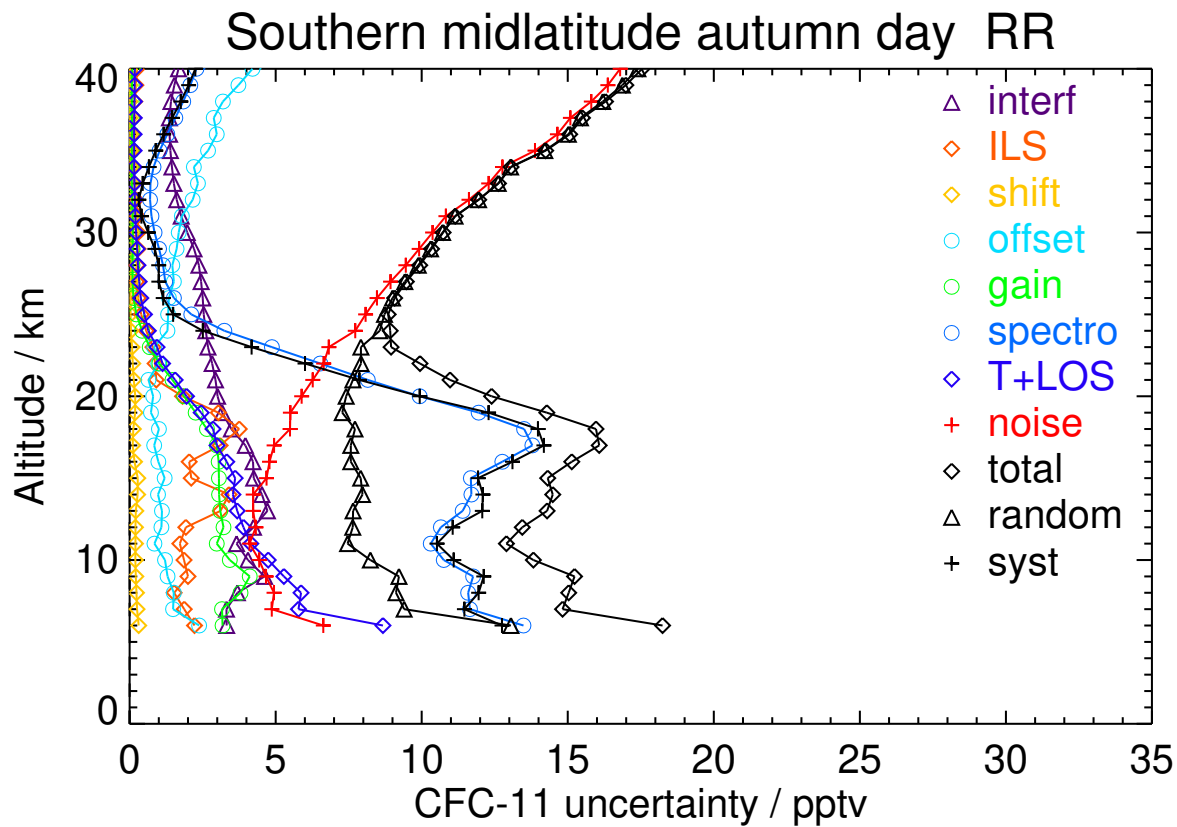

**Figure S59.** V8R\_F-11\_261 Southern midlatitude autumn day

**Table S61.** CFC-11 error budget for Southern midlatitude autumn night. All uncertainties are  $1\sigma$ .

| altitude<br>(km) | mean target<br>(pptv) | interf<br>(pptv) | ILS<br>(pptv) | shift<br>(pptv) | offset<br>(pptv) | gain<br>(pptv) | spectro<br>(pptv) | T+LOS<br>(pptv) | noise<br>(pptv) | random<br>(pptv) | syst<br>(pptv) | total<br>(pptv) |
|------------------|-----------------------|------------------|---------------|-----------------|------------------|----------------|-------------------|-----------------|-----------------|------------------|----------------|-----------------|
| 8                | 241.83                | 3.36             | 2.16          | 0.18            | 1.65             | 3.04           | 10.16             | 5.99            | 5.39            | 9.58             | 10.22          | 14.01           |
| 11               | 234.41                | 3.81             | 1.60          | 0.22            | 1.51             | 2.92           | 10.72             | 4.80            | 4.98            | 8.50             | 10.88          | 13.81           |
| 14               | 218.92                | 4.84             | 3.82          | 0.28            | 1.37             | 3.10           | 12.03             | 3.75            | 4.57            | 8.38             | 12.62          | 15.14           |
| 17               | 168.37                | 4.02             | 3.36          | 0.11            | 1.04             | 2.97           | 14.69             | 3.13            | 5.18            | 7.87             | 15.09          | 17.02           |
| 20               | 86.11                 | 3.03             | 2.17          | 0.22            | 0.96             | 1.72           | 10.07             | 2.12            | 6.03            | 7.68             | 10.07          | 12.66           |
| 23               | 25.87                 | 2.70             | 0.67          | 0.06            | 0.91             | 0.66           | 4.71              | 0.94            | 7.25            | 8.18             | 4.20           | 9.20            |
| 26               | 10.09                 | 2.51             | 0.31          | 0.03            | 1.18             | 0.17           | 1.78              | 0.40            | 7.98            | 8.58             | 1.17           | 8.66            |
| 29               | 5.64                  | 2.23             | 0.38          | 0.07            | 1.57             | 0.07           | 1.06              | 0.26            | 10.17           | 10.57            | 0.76           | 10.59           |
| 32               | 7.13                  | 1.74             | 0.22          | 0.07            | 1.91             | 0.08           | 0.60              | 0.16            | 11.06           | 11.37            | 0.29           | 11.38           |
| 35               | 6.50                  | 1.46             | 0.10          | 0.04            | 2.40             | 0.08           | 1.13              | 0.14            | 13.28           | 13.59            | 0.98           | 13.62           |
| 38               | 6.87                  | 1.74             | 0.19          | 0.02            | 3.02             | 0.09           | 1.93              | 0.16            | 15.33           | 15.73            | 1.84           | 15.84           |
| 41               | 10.70                 | 2.44             | 0.33          | 0.02            | 4.64             | 0.14           | 2.37              | 0.18            | 16.84           | 17.65            | 2.32           | 17.80           |

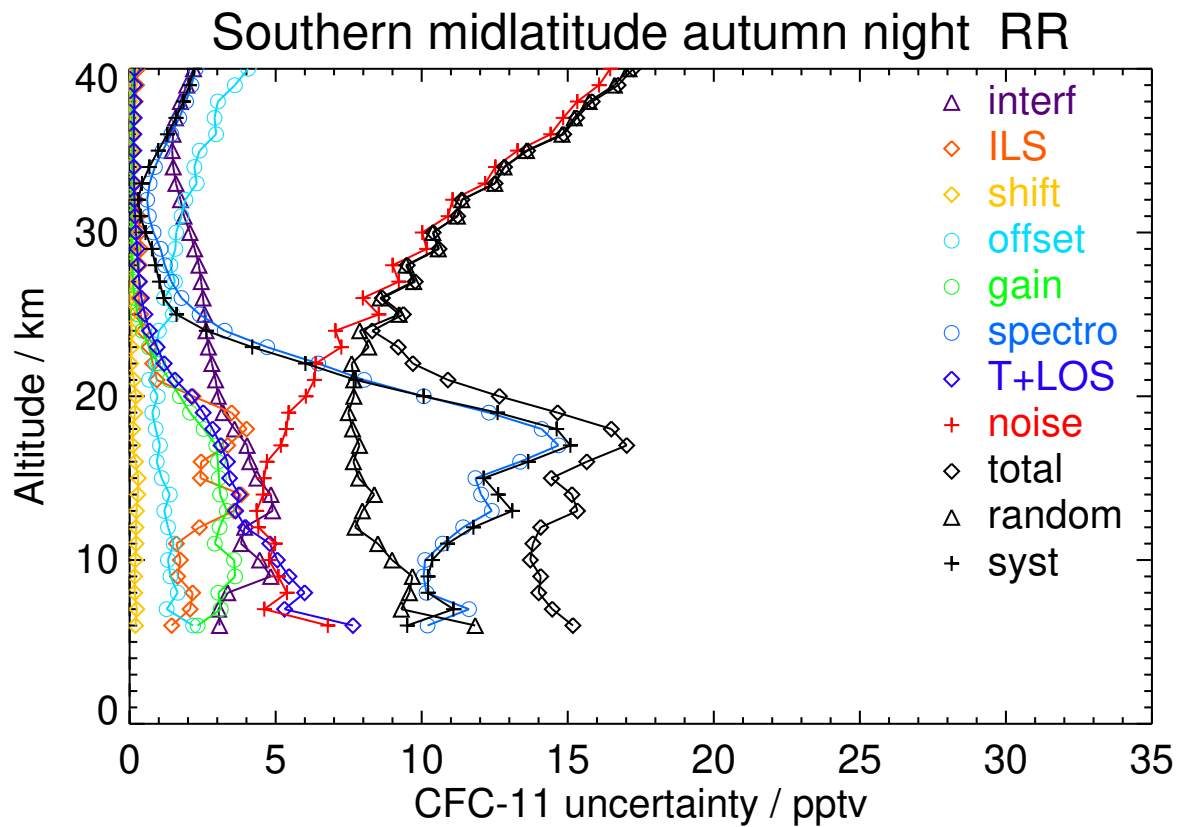

**Figure S60.** V8R\_F-11\_261 Southern midlatitude autumn night

**Table S62.** CFC-11 error budget for Southern polar winter day. All uncertainties are  $1\sigma$ .

| altitude<br>(km) | mean target<br>(pptv) | interf<br>(pptv) | ILS<br>(pptv) | shift<br>(pptv) | offset<br>(pptv) | gain<br>(pptv) | spectro<br>(pptv) | T+LOS<br>(pptv) | noise<br>(pptv) | random<br>(pptv) | syst<br>(pptv) | total<br>(pptv) |
|------------------|-----------------------|------------------|---------------|-----------------|------------------|----------------|-------------------|-----------------|-----------------|------------------|----------------|-----------------|
| 5                | 241.08                | 3.29             | 1.78          | 0.31            | 2.91             | 3.22           | 13.85             | 10.32           | 7.60            | 14.69            | 13.16          | 19.73           |
| 8                | 242.84                | 4.42             | 1.24          | 0.23            | 0.85             | 3.73           | 11.85             | 4.73            | 4.09            | 8.15             | 12.20          | 14.68           |
| 11               | 224.35                | 4.57             | 2.62          | 0.33            | 1.06             | 3.50           | 13.80             | 4.20            | 4.19            | 8.13             | 14.17          | 16.34           |
| 14               | 155.47                | 4.87             | 4.29          | 0.38            | 1.15             | 2.96           | 17.08             | 4.22            | 5.04            | 9.51             | 17.22          | 19.68           |
| 17               | 47.59                 | 4.15             | 2.85          | 0.13            | 0.84             | 1.47           | 10.17             | 2.27            | 6.11            | 8.46             | 10.13          | 13.20           |
| 20               | 7.85                  | 3.15             | 0.51          | 0.03            | 0.93             | 0.41           | 2.67              | 0.69            | 7.56            | 8.64             | 1.17           | 8.72            |
| 23               | 1.41                  | 2.79             | 0.21          | 0.03            | 1.47             | 0.10           | 1.16              | 0.32            | 8.70            | 9.31             | 0.59           | 9.33            |
| 26               | 0.54                  | 2.59             | 0.28          | 0.05            | 1.91             | 0.08           | 1.01              | 0.26            | 11.18           | 11.65            | 0.82           | 11.68           |
| 29               | 3.27                  | 2.16             | 0.26          | 0.05            | 2.17             | 0.11           | 0.65              | 0.21            | 12.12           | 12.52            | 0.45           | 12.52           |
| 32               | 1.62                  | 1.74             | 0.26          | 0.05            | 2.87             | 0.13           | 0.79              | 0.20            | 14.20           | 14.61            | 0.44           | 14.62           |
| 35               | 0.59                  | 2.08             | 0.17          | 0.02            | 3.78             | 0.15           | 1.28              | 0.18            | 16.19           | 16.77            | 1.18           | 16.81           |
| 38               | 1.02                  | 2.88             | 0.21          | 0.02            | 5.14             | 0.13           | 1.87              | 0.20            | 17.93           | 18.89            | 1.78           | 18.97           |
| 41               | -1.47                 | 3.74             | 0.29          | 0.02            | 7.57             | 0.18           | 2.27              | 0.25            | 19.20           | 20.99            | 2.17           | 21.10           |

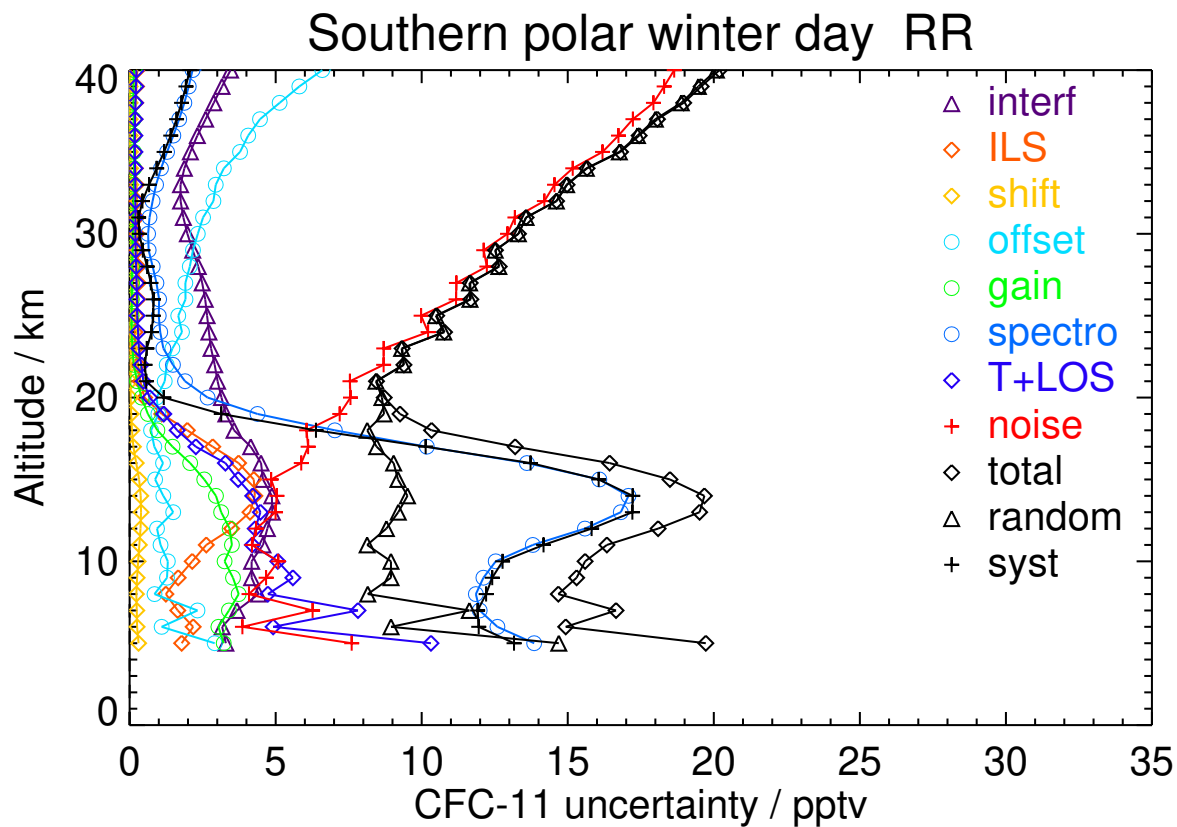

**Figure S61.** V8R\_F-11\_261 Southern polar winter day

**Table S63.** CFC-11 error budget for Southern polar winter night. All uncertainties are  $1\sigma$ .

| altitude<br>(km) | mean target<br>(pptv) | interf<br>(pptv) | ILS<br>(pptv) | shift<br>(pptv) | offset<br>(pptv) | gain<br>(pptv) | spectro<br>(pptv) | T+LOS<br>(pptv) | noise<br>(pptv) | random<br>(pptv) | syst<br>(pptv) | total<br>(pptv) |
|------------------|-----------------------|------------------|---------------|-----------------|------------------|----------------|-------------------|-----------------|-----------------|------------------|----------------|-----------------|
| 5                | 245.20                | 3.00             | 2.76          | 0.70            | 2.90             | 3.28           | 13.98             | 10.20           | 7.49            | 14.60            | 13.37          | 19.80           |
| 8                | 245.91                | 4.43             | 0.88          | 0.19            | 1.04             | 3.49           | 9.59              | 4.92            | 4.37            | 8.42             | 9.90           | 13.00           |
| 11               | 227.45                | 4.32             | 2.00          | 0.28            | 1.04             | 3.60           | 11.79             | 4.09            | 4.21            | 7.87             | 12.18          | 14.50           |
| 14               | 177.15                | 4.48             | 4.19          | 0.39            | 0.96             | 3.05           | 15.92             | 4.15            | 4.78            | 8.65             | 16.34          | 18.48           |
| 17               | 60.98                 | 3.91             | 3.40          | 0.24            | 0.72             | 1.54           | 10.81             | 2.41            | 5.71            | 7.97             | 11.02          | 13.60           |
| 20               | 7.69                  | 3.05             | 0.99          | 0.08            | 0.92             | 0.37           | 3.51              | 0.89            | 7.17            | 8.41             | 2.26           | 8.71            |
| 23               | 0.94                  | 2.78             | 0.32          | 0.04            | 1.34             | 0.10           | 1.06              | 0.37            | 8.40            | 9.02             | 0.32           | 9.02            |
| 26               | 2.51                  | 2.59             | 0.36          | 0.06            | 1.88             | 0.08           | 1.36              | 0.30            | 11.12           | 11.60            | 1.09           | 11.66           |
| 29               | 1.69                  | 2.26             | 0.41          | 0.06            | 2.16             | 0.08           | 0.92              | 0.23            | 12.21           | 12.63            | 0.69           | 12.65           |
| 32               | 2.52                  | 1.85             | 0.26          | 0.03            | 2.85             | 0.09           | 0.71              | 0.18            | 14.07           | 14.49            | 0.45           | 14.50           |
| 35               | 4.35                  | 2.00             | 0.17          | 0.03            | 3.74             | 0.10           | 1.29              | 0.19            | 15.92           | 16.49            | 1.13           | 16.53           |
| 38               | 3.42                  | 2.67             | 0.21          | 0.02            | 5.09             | 0.12           | 1.79              | 0.21            | 17.70           | 18.62            | 1.69           | 18.70           |
| 41               | 4.26                  | 3.55             | 0.27          | 0.02            | 7.65             | 0.18           | 2.11              | 0.26            | 19.13           | 20.93            | 2.00           | 21.02           |

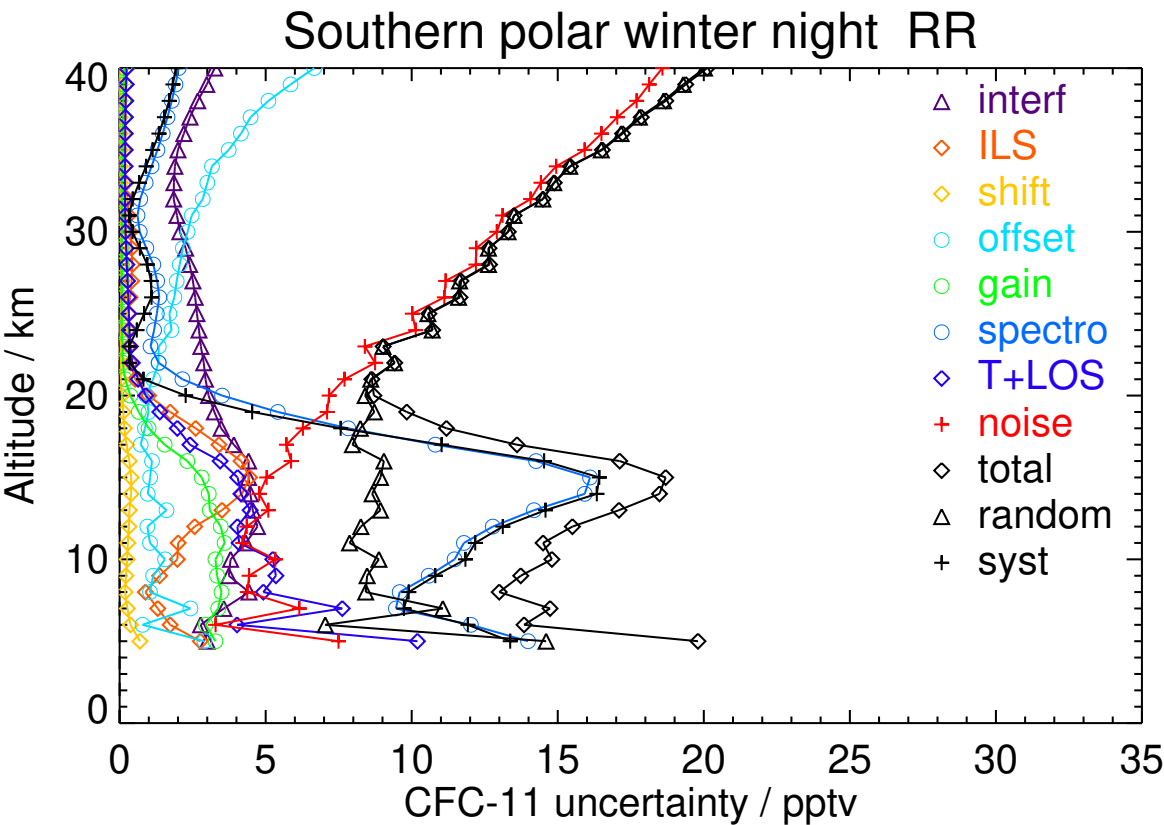

**Figure S62.** V8R\_F-11\_261 Southern polar winter night



Table S64. CFC-11 error budget for Southern polar spring day. All uncertainties are  $1\sigma$ .

| altitude<br>(km) | mean target<br>(pptv) | interf<br>(pptv) | ILS<br>(pptv) | shift<br>(pptv) | offset<br>(pptv) | gain<br>(pptv) | spectro<br>(pptv) | T+LOS<br>(pptv) | noise<br>(pptv) | random<br>(pptv) | syst<br>(pptv) | total<br>(pptv) |
|------------------|-----------------------|------------------|---------------|-----------------|------------------|----------------|-------------------|-----------------|-----------------|------------------|----------------|-----------------|
| 5                | 236.84                | 3.28             | 2.60          | 0.24            | 2.54             | 2.44           | 12.97             | 8.89            | 7.09            | 13.43            | 12.13          | 18.10           |
| 8                | 244.86                | 4.85             | 1.83          | 0.29            | 1.13             | 3.74           | 11.29             | 4.75            | 4.62            | 8.82             | 11.65          | 14.61           |
| 11               | 223.09                | 4.90             | 6.03          | 0.24            | 1.23             | 3.53           | 16.96             | 4.31            | 4.38            | 9.87             | 17.40          | 20.00           |
| 14               | 116.07                | 5.67             | 6.35          | 0.16            | 1.27             | 1.68           | 14.26             | 3.52            | 4.92            | 12.44            | 12.73          | 17.80           |
| 17               | 58.08                 | 4.35             | 3.75          | 0.20            | 0.98             | 1.31           | 9.36              | 1.86            | 5.58            | 9.78             | 7.89           | 12.57           |
| 20               | 18.84                 | 3.25             | 0.72          | 0.07            | 0.58             | 0.56           | 2.70              | 0.73            | 6.48            | 7.76             | 1.18           | 7.85            |
| 23               | 13.65                 | 2.85             | 0.36          | 0.03            | 0.98             | 0.27           | 1.52              | 0.37            | 6.60            | 7.37             | 1.00           | 7.44            |
| 26               | 9.02                  | 2.72             | 0.44          | 0.03            | 1.59             | 0.13           | 0.97              | 0.29            | 8.81            | 9.40             | 0.56           | 9.42            |
| 29               | 6.81                  | 2.75             | 0.36          | 0.04            | 1.26             | 0.11           | 0.61              | 0.20            | 8.74            | 9.27             | 0.42           | 9.28            |
| 32               | 2.84                  | 2.69             | 0.52          | 0.08            | 2.36             | 0.15           | 0.91              | 0.21            | 10.80           | 11.42            | 0.57           | 11.43           |
| 35               | 2.58                  | 2.75             | 0.30          | 0.07            | 3.03             | 0.12           | 1.00              | 0.19            | 12.95           | 13.60            | 0.89           | 13.63           |
| 38               | 6.07                  | 2.66             | 0.26          | 0.05            | 3.01             | 0.11           | 1.34              | 0.18            | 14.42           | 14.99            | 1.23           | 15.04           |
| 41               | 8.67                  | 2.72             | 0.23          | 0.04            | 3.50             | 0.12           | 1.39              | 0.18            | 15.97           | 16.59            | 1.26           | 16.64           |

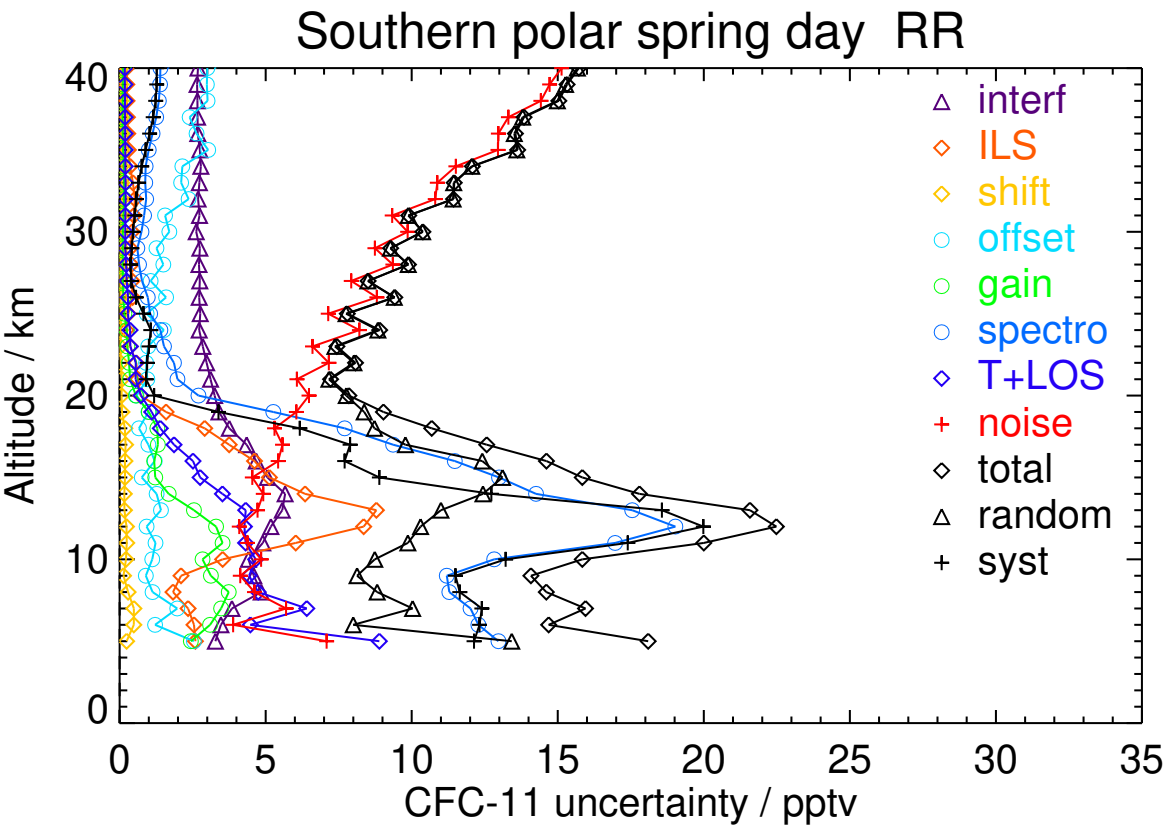

Figure S63. V8R\_F-11\_261 Southern polar spring day

Table S65. CFC-11 error budget for Southern polar spring night. All uncertainties are 1σ.

| altitude<br>(km) | mean target<br>(pptv) | interf<br>(pptv) | ILS<br>(pptv) | shift<br>(pptv) | offset<br>(pptv) | gain<br>(pptv) | spectro<br>(pptv) | T+LOS<br>(pptv) | noise<br>(pptv) | random<br>(pptv) | syst<br>(pptv) | total<br>(pptv) |
|------------------|-----------------------|------------------|---------------|-----------------|------------------|----------------|-------------------|-----------------|-----------------|------------------|----------------|-----------------|
| 5                | 236.10                | 3.11             | 2.09          | 0.23            | 2.34             | 2.63           | 12.23             | 8.59            | 6.78            | 13.97            | 10.04          | 17.20           |
| 8                | 250.26                | 4.91             | 1.92          | 0.35            | 1.49             | 3.89           | 13.23             | 5.42            | 5.30            | 12.21            | 11.34          | 16.66           |
| 11               | 214.24                | 4.29             | 4.38          | 0.23            | 1.52             | 3.45           | 16.19             | 4.01            | 4.47            | 11.31            | 14.90          | 18.71           |
| 14               | 125.05                | 5.09             | 6.90          | 0.19            | 1.36             | 2.31           | 16.08             | 3.65            | 4.89            | 13.14            | 14.28          | 19.40           |
| 17               | 59.27                 | 4.06             | 3.44          | 0.15            | 1.22             | 1.26           | 8.13              | 1.86            | 5.50            | 9.66             | 6.16           | 11.46           |
| 20               | 24.62                 | 3.13             | 0.73          | 0.07            | 0.47             | 0.70           | 3.11              | 0.91            | 6.32            | 7.51             | 2.24           | 7.84            |
| 23               | 15.20                 | 2.83             | 0.24          | 0.02            | 0.95             | 0.28           | 1.56              | 0.40            | 6.41            | 7.18             | 1.08           | 7.26            |
| 26               | 10.10                 | 2.67             | 0.31          | 0.03            | 1.57             | 0.11           | 0.97              | 0.30            | 8.77            | 9.34             | 0.56           | 9.36            |
| 29               | 6.81                  | 2.50             | 0.32          | 0.04            | 1.19             | 0.09           | 0.80              | 0.18            | 8.63            | 9.09             | 0.46           | 9.11            |
| 32               | 8.97                  | 2.19             | 0.50          | 0.08            | 2.34             | 0.14           | 1.00              | 0.20            | 10.78           | 11.29            | 0.57           | 11.31           |
| 35               | 5.78                  | 2.43             | 0.29          | 0.07            | 2.99             | 0.11           | 0.93              | 0.17            | 12.90           | 13.47            | 0.79           | 13.50           |
| 38               | 5.03                  | 2.54             | 0.22          | 0.03            | 2.95             | 0.10           | 1.55              | 0.18            | 14.40           | 14.94            | 1.26           | 15.00           |
| 41               | 6.46                  | 2.73             | 0.19          | 0.03            | 3.52             | 0.10           | 1.81              | 0.19            | 15.95           | 16.60            | 1.46           | 16.66           |

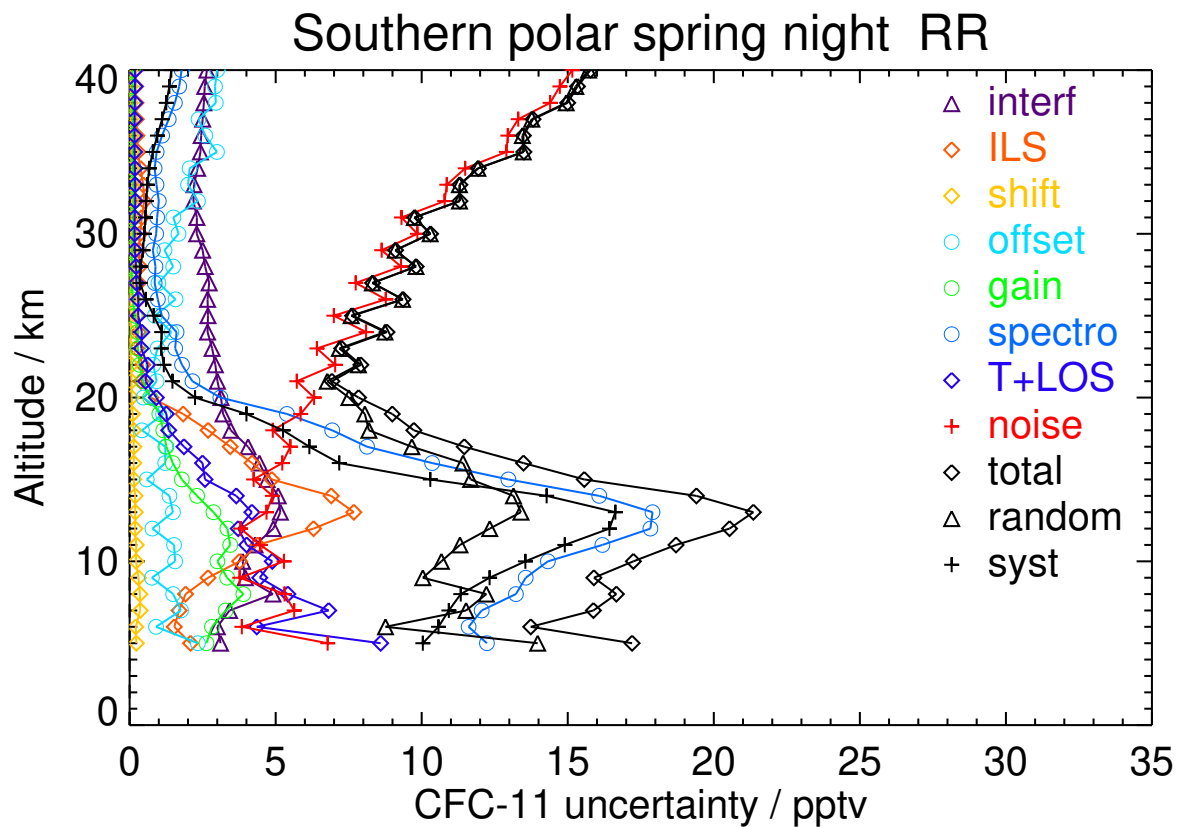

Figure S64. V8R\_F-11\_261 Southern polar spring night

**Table S66.** CFC-11 error budget for Southern polar summer day. All uncertainties are  $1\sigma$ .

| altitude<br>(km) | mean target<br>(pptv) | interf<br>(pptv) | ILS<br>(pptv) | shift<br>(pptv) | offset<br>(pptv) | gain<br>(pptv) | spectro<br>(pptv) | T+LOS<br>(pptv) | noise<br>(pptv) | random<br>(pptv) | syst<br>(pptv) | total<br>(pptv) |
|------------------|-----------------------|------------------|---------------|-----------------|------------------|----------------|-------------------|-----------------|-----------------|------------------|----------------|-----------------|
| 5                | 224.22                | 3.75             | 3.23          | 0.18            | 2.46             | 2.87           | 11.89             | 8.00            | 7.27            | 13.12            | 11.17          | 17.24           |
| 8                | 242.34                | 5.04             | 2.00          | 0.21            | 1.39             | 4.34           | 12.30             | 5.43            | 4.81            | 9.69             | 12.66          | 15.95           |
| 11               | 203.78                | 3.49             | 2.77          | 0.27            | 1.25             | 2.93           | 10.75             | 3.65            | 3.95            | 7.26             | 11.04          | 13.22           |
| 14               | 189.26                | 4.47             | 3.98          | 0.38            | 1.52             | 2.45           | 11.06             | 3.19            | 4.28            | 8.29             | 11.25          | 13.97           |
| 17               | 138.07                | 3.68             | 3.58          | 0.36            | 1.21             | 2.22           | 11.79             | 2.68            | 4.85            | 7.48             | 12.11          | 14.23           |
| 20               | 66.70                 | 2.97             | 0.85          | 0.30            | 0.46             | 1.59           | 8.07              | 1.67            | 5.74            | 7.00             | 8.01           | 10.64           |
| 23               | 19.26                 | 2.66             | 0.52          | 0.06            | 0.80             | 0.42           | 2.60              | 0.65            | 5.56            | 6.33             | 2.49           | 6.80            |
| 26               | 7.25                  | 2.57             | 0.28          | 0.05            | 1.87             | 0.08           | 0.83              | 0.34            | 8.50            | 9.11             | 0.44           | 9.12            |
| 29               | 7.12                  | 2.15             | 0.33          | 0.03            | 1.13             | 0.06           | 0.80              | 0.22            | 8.15            | 8.53             | 0.60           | 8.55            |
| 32               | 4.85                  | 1.69             | 0.58          | 0.10            | 2.34             | 0.09           | 0.74              | 0.21            | 10.39           | 10.81            | 0.65           | 10.83           |
| 35               | 5.18                  | 2.58             | 0.22          | 0.07            | 3.08             | 0.11           | 0.74              | 0.15            | 12.45           | 13.10            | 0.58           | 13.11           |
| 38               | 5.14                  | 2.32             | 0.18          | 0.03            | 2.86             | 0.09           | 1.35              | 0.14            | 13.69           | 14.19            | 1.26           | 14.25           |
| 41               | 4.97                  | 2.92             | 0.28          | 0.02            | 3.09             | 0.15           | 1.83              | 0.16            | 15.15           | 15.75            | 1.80           | 15.85           |

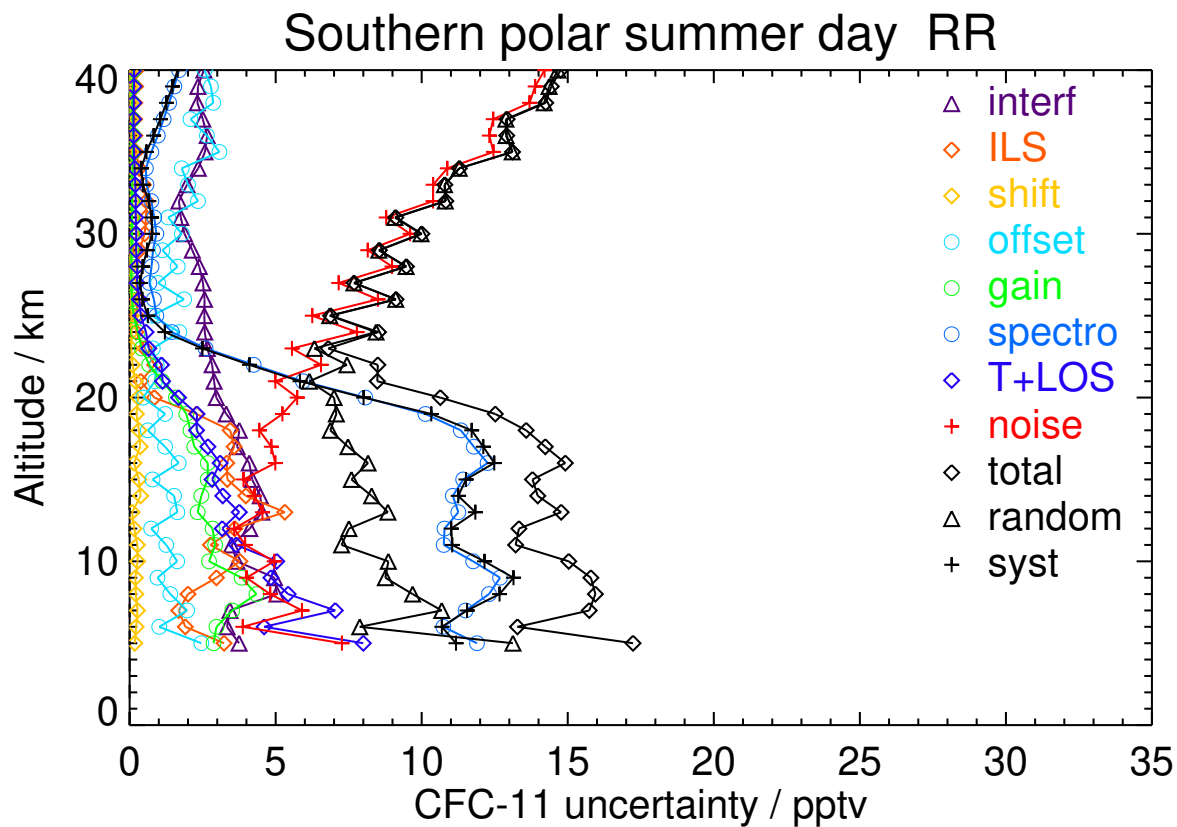

**Figure S65.** V8R\_F-11\_261 Southern polar summer day

Table S67. CFC-11 error budget for Southern polar summer night. All uncertainties are  $1\sigma$ .

| altitude<br>(km) | mean target<br>(pptv) | interf<br>(pptv) | ILS<br>(pptv) | shift<br>(pptv) | offset<br>(pptv) | gain<br>(pptv) | spectro<br>(pptv) | T+LOS<br>(pptv) | noise<br>(pptv) | random<br>(pptv) | syst<br>(pptv) | total<br>(pptv) |
|------------------|-----------------------|------------------|---------------|-----------------|------------------|----------------|-------------------|-----------------|-----------------|------------------|----------------|-----------------|
| 5                | 216.00                | 3.21             | 2.17          | 0.22            | 2.43             | 2.72           | 9.95              | 7.66            | 6.91            | 11.70            | 9.84           | 15.29           |
| 8                | 247.25                | 4.54             | 1.19          | 0.20            | 0.94             | 3.82           | 11.71             | 4.62            | 4.15            | 8.35             | 11.98          | 14.60           |
| 11               | 207.12                | 3.60             | 3.08          | 0.29            | 0.67             | 2.93           | 11.45             | 3.51            | 3.42            | 8.01             | 11.07          | 13.66           |
| 14               | 192.27                | 4.53             | 4.66          | 0.27            | 0.68             | 2.77           | 12.10             | 2.89            | 3.63            | 8.46             | 12.12          | 14.78           |
| 17               | 142.67                | 3.83             | 3.55          | 0.18            | 0.59             | 2.54           | 12.31             | 2.41            | 4.32            | 7.03             | 12.68          | 14.49           |
| 20               | 68.29                 | 2.95             | 0.91          | 0.16            | 0.60             | 1.56           | 8.18              | 1.54            | 5.35            | 6.66             | 8.12           | 10.51           |
| 23               | 22.18                 | 2.65             | 0.65          | 0.03            | 0.55             | 0.45           | 3.22              | 0.80            | 5.60            | 6.39             | 3.09           | 7.10            |
| 26               | 3.71                  | 2.53             | 0.24          | 0.04            | 1.63             | 0.06           | 0.79              | 0.31            | 8.29            | 8.86             | 0.36           | 8.86            |
| 29               | 5.19                  | 2.25             | 0.35          | 0.05            | 1.26             | 0.06           | 0.61              | 0.21            | 8.52            | 8.92             | 0.51           | 8.93            |
| 32               | 5.37                  | 1.58             | 0.33          | 0.08            | 2.16             | 0.09           | 0.66              | 0.18            | 10.32           | 10.68            | 0.38           | 10.69           |
| 35               | 6.19                  | 2.36             | 0.16          | 0.04            | 2.79             | 0.13           | 0.86              | 0.14            | 12.45           | 12.99            | 0.69           | 13.01           |
| 38               | 6.02                  | 2.38             | 0.21          | 0.02            | 2.78             | 0.10           | 1.42              | 0.14            | 13.84           | 14.33            | 1.34           | 14.39           |
| 41               | 4.97                  | 2.71             | 0.29          | 0.02            | 3.17             | 0.11           | 1.81              | 0.14            | 15.32           | 15.89            | 1.78           | 15.99           |

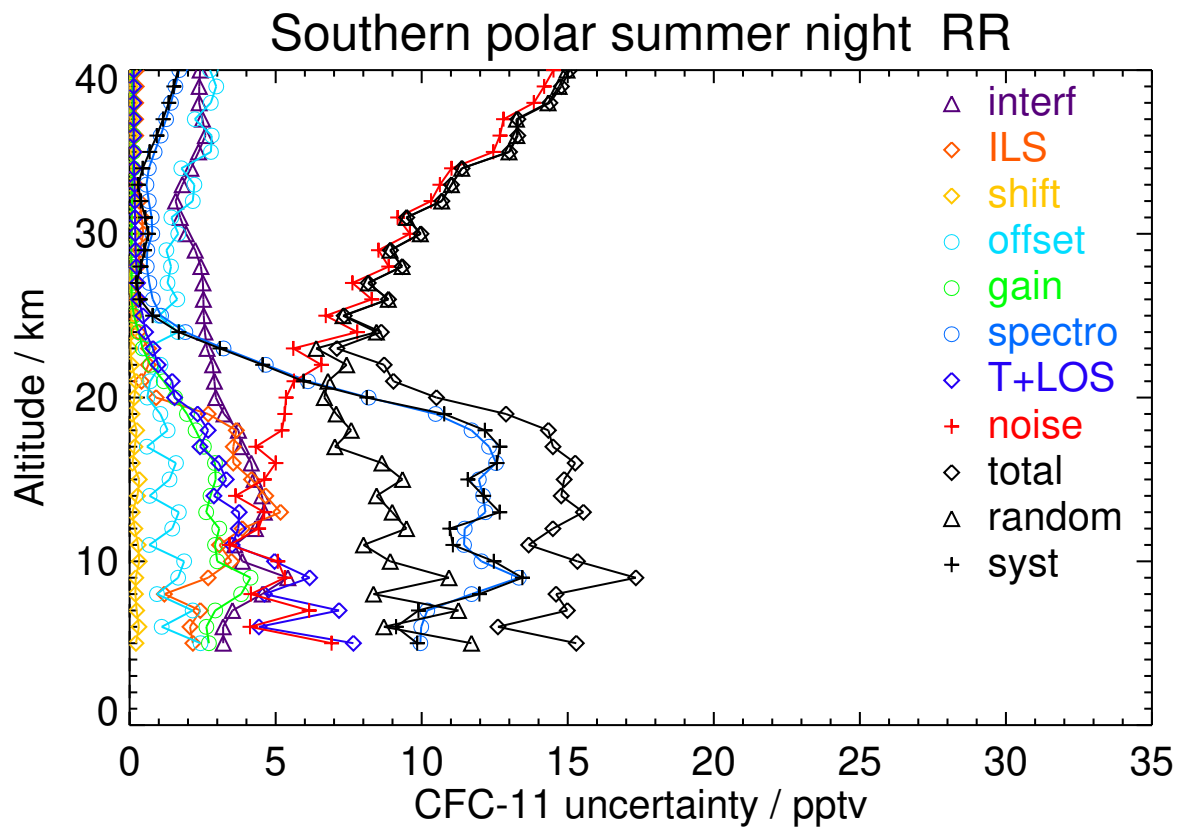

Figure S66. V8R\_F-11\_261 Southern polar summer night

**Table S68.** CFC-11 error budget for Southern polar autumn day. All uncertainties are  $1\sigma$ .

| altitude<br>(km) | mean target<br>(pptv) | interf<br>(pptv) | ILS<br>(pptv) | shift<br>(pptv) | offset<br>(pptv) | gain<br>(pptv) | spectro<br>(pptv) | T+LOS<br>(pptv) | noise<br>(pptv) | random<br>(pptv) | syst<br>(pptv) | total<br>(pptv) |
|------------------|-----------------------|------------------|---------------|-----------------|------------------|----------------|-------------------|-----------------|-----------------|------------------|----------------|-----------------|
| 5                | 229.71                | 3.74             | 2.16          | 0.50            | 2.74             | 3.30           | 13.64             | 9.61            | 7.58            | 15.39            | 11.67          | 19.32           |
| 8                | 235.07                | 4.91             | 1.39          | 0.25            | 1.18             | 4.38           | 11.99             | 5.29            | 4.61            | 9.15             | 12.49          | 15.48           |
| 11               | 215.50                | 3.73             | 1.46          | 0.26            | 1.28             | 3.11           | 10.52             | 3.71            | 4.16            | 7.24             | 10.81          | 13.01           |
| 14               | 196.95                | 4.27             | 2.90          | 0.35            | 1.34             | 3.13           | 12.79             | 3.53            | 4.63            | 7.86             | 13.19          | 15.35           |
| 17               | 123.43                | 3.81             | 3.01          | 0.12            | 0.99             | 2.53           | 12.28             | 2.72            | 5.38            | 7.59             | 12.67          | 14.77           |
| 20               | 51.83                 | 3.10             | 0.75          | 0.14            | 0.60             | 1.59           | 8.02              | 1.50            | 6.45            | 7.87             | 7.70           | 11.01           |
| 23               | 9.42                  | 2.73             | 0.29          | 0.05            | 1.05             | 0.35           | 2.51              | 0.61            | 7.01            | 7.76             | 2.08           | 8.04            |
| 26               | 6.47                  | 2.59             | 0.23          | 0.03            | 1.75             | 0.13           | 1.25              | 0.35            | 9.76            | 10.30            | 0.87           | 10.33           |
| 29               | 11.67                 | 2.21             | 0.29          | 0.07            | 1.80             | 0.15           | 1.43              | 0.29            | 10.65           | 11.07            | 1.14           | 11.13           |
| 32               | 3.59                  | 1.61             | 0.28          | 0.06            | 2.52             | 0.12           | 0.92              | 0.25            | 13.25           | 13.61            | 0.47           | 13.62           |
| 35               | -1.26                 | 1.28             | 0.13          | 0.02            | 3.26             | 0.11           | 1.13              | 0.18            | 15.65           | 16.05            | 0.99           | 16.08           |
| 38               | -2.80                 | 1.28             | 0.18          | 0.02            | 4.37             | 0.11           | 2.02              | 0.19            | 17.65           | 18.23            | 1.98           | 18.34           |
| 41               | -1.42                 | 1.39             | 0.30          | 0.02            | 7.01             | 0.09           | 2.65              | 0.23            | 19.24           | 20.53            | 2.63           | 20.70           |

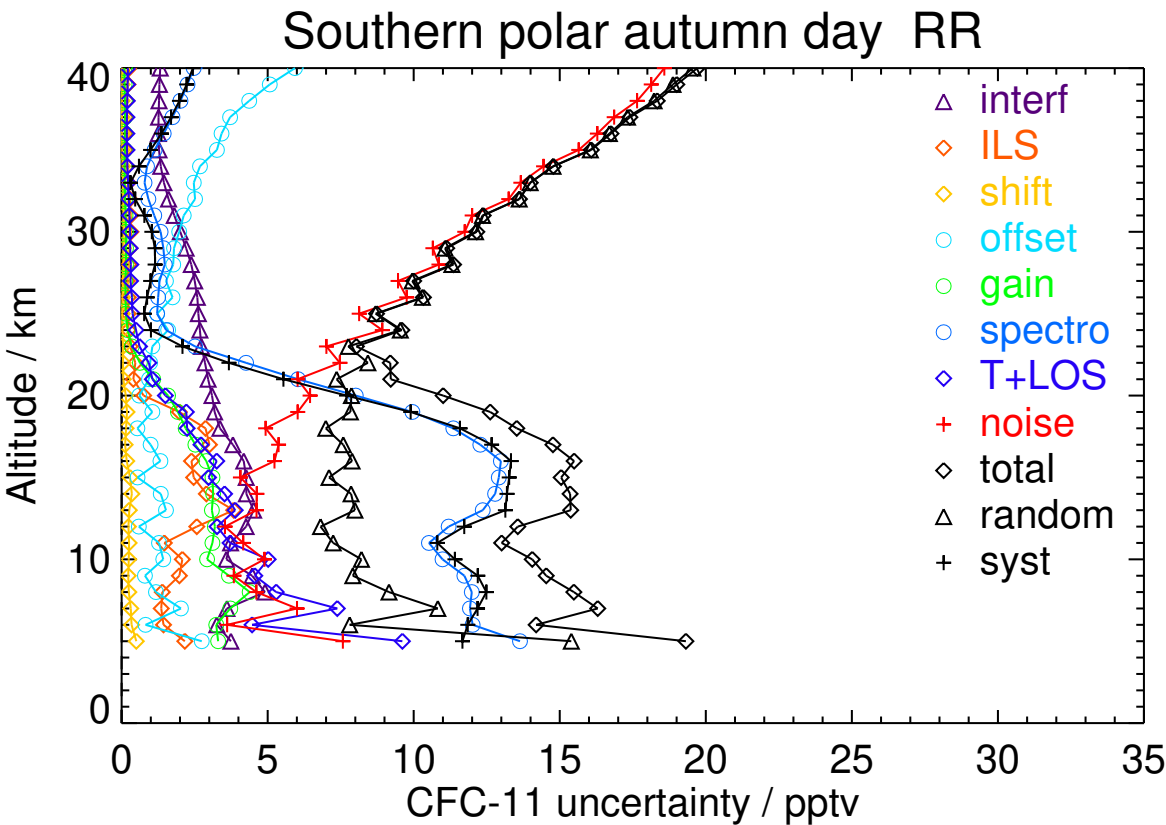

**Figure S67.** V8R\_F-11\_261 Southern polar autumn day

Table S69. CFC-11 error budget for Southern polar autumn night. All uncertainties are  $1\sigma$ .

| altitude<br>(km) | mean target<br>(pptv) | interf<br>(pptv) | ILS<br>(pptv) | shift<br>(pptv) | offset<br>(pptv) | gain<br>(pptv) | spectro<br>(pptv) | T+LOS<br>(pptv) | noise<br>(pptv) | random<br>(pptv) | syst<br>(pptv) | total<br>(pptv) |
|------------------|-----------------------|------------------|---------------|-----------------|------------------|----------------|-------------------|-----------------|-----------------|------------------|----------------|-----------------|
| 5                | 231.29                | 3.40             | 2.46          | 0.34            | 2.18             | 3.05           | 12.82             | 7.90            | 6.45            | 12.78            | 11.70          | 17.32           |
| 8                | 238.24                | 4.59             | 1.46          | 0.26            | 1.60             | 3.77           | 10.46             | 5.98            | 5.31            | 9.83             | 10.81          | 14.61           |
| 11               | 218.60                | 4.02             | 1.46          | 0.24            | 1.52             | 3.03           | 11.09             | 3.83            | 4.36            | 7.56             | 11.38          | 13.66           |
| 14               | 194.40                | 4.45             | 2.90          | 0.35            | 1.28             | 2.98           | 13.04             | 3.64            | 4.72            | 8.06             | 13.40          | 15.64           |
| 17               | 107.87                | 3.74             | 3.28          | 0.18            | 0.93             | 2.43           | 13.46             | 2.78            | 5.48            | 7.82             | 13.76          | 15.83           |
| 20               | 29.62                 | 3.06             | 0.80          | 0.10            | 0.65             | 0.94           | 5.47              | 1.30            | 6.54            | 7.67             | 5.18           | 9.25            |
| 23               | 6.34                  | 2.77             | 0.23          | 0.05            | 1.09             | 0.16           | 1.70              | 0.53            | 7.23            | 7.91             | 1.30           | 8.02            |
| 26               | 9.39                  | 2.60             | 0.18          | 0.04            | 1.73             | 0.14           | 1.53              | 0.37            | 9.98            | 10.50            | 1.31           | 10.58           |
| 29               | 6.39                  | 2.20             | 0.28          | 0.07            | 1.87             | 0.12           | 1.29              | 0.31            | 11.00           | 11.39            | 1.15           | 11.45           |
| 32               | 0.60                  | 1.60             | 0.19          | 0.04            | 2.57             | 0.06           | 0.56              | 0.21            | 13.52           | 13.87            | 0.25           | 13.87           |
| 35               | -1.02                 | 1.22             | 0.13          | 0.02            | 3.35             | 0.06           | 1.44              | 0.17            | 15.92           | 16.33            | 1.36           | 16.38           |
| 38               | 2.66                  | 1.17             | 0.23          | 0.02            | 4.56             | 0.06           | 2.21              | 0.20            | 17.89           | 18.51            | 2.18           | 18.64           |
| 41               | 4.24                  | 1.55             | 0.32          | 0.03            | 7.29             | 0.07           | 2.68              | 0.24            | 19.49           | 20.87            | 2.67           | 21.04           |

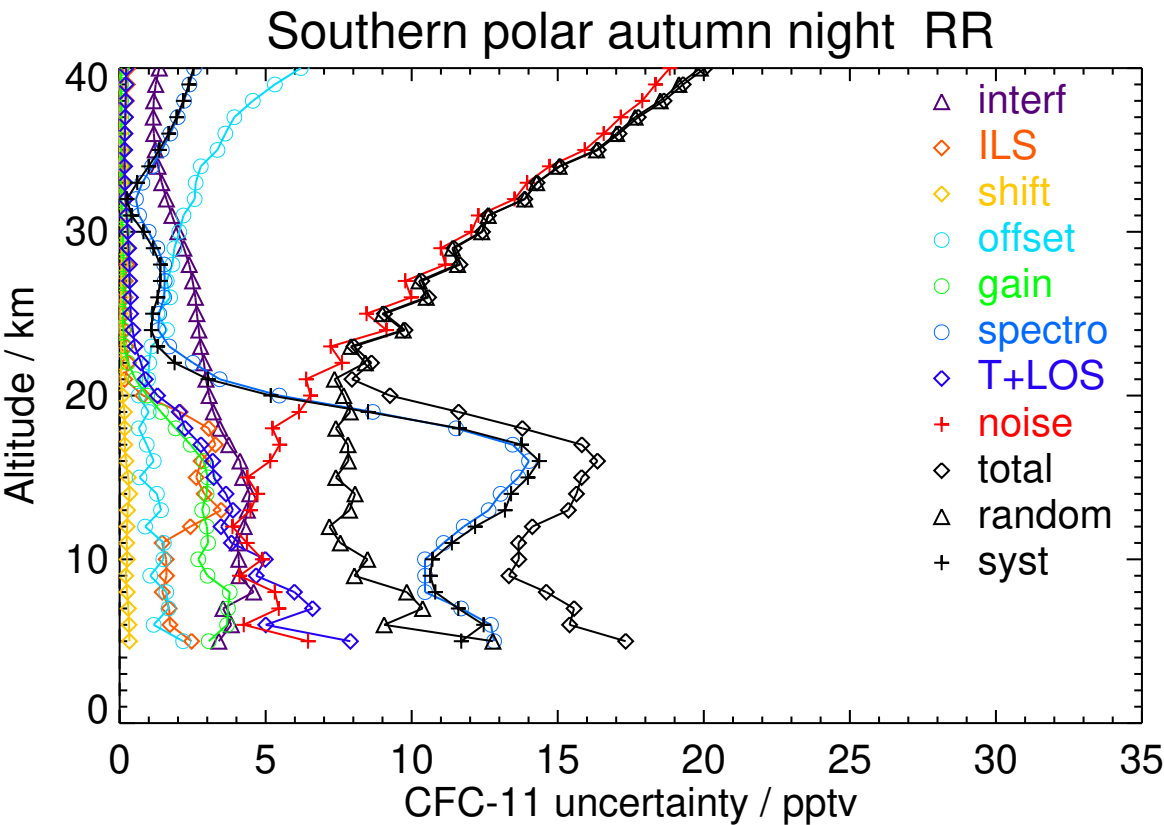

Figure S68. V8R\_F-11\_261 Southern polar autumn night
