# Supplementary material for: Version 8 IMK/IAA MIPAS measurements of CFC-11, CFC-12, and HCFC-22
Source: Copernicus journal article supplement (doi:10.5194/amt-2023-172), 2023-08-11
Supplement: Supplementary file 6 [file amt-2023-172-supplement.zip]

## *Supplement 3 to* **Version 8 IMK/IAA MIPAS measurements of CFC-11, CFC-12, and HCFC-22**

**Gabriele P. Stiller et al.**

*Correspondence to:* Gabriele P. Stiller (gabriele.stiller@kit.edu)

This document serves as reference for the definitions of the representative atmospheres used for the calculation of HCFC-22 error budgets, as listed in Tab. S1, and as collection of the respective error budgets for FR data (2002-2004), which are listed in tables S2–S35 and depicted in figures S1–S34, and the respective error budgets for RR data (2005-2012), which are listed in tables S36–S69 and depicted in figures S35–S68.

The errors are presented as relative errors in percent, even if they are of additive nature, i.e., do not scale with the retrieved volume mixing ratio. They were calculated with respect to the average ozone profile that was calculated from the single geolocations which contribute to the respective representative atmospheres.

**Table S1.** Labels and definitions of the representative atmospheric conditions which were used to calculate the error budget for FR and RR data.

| representative atmosphere label   | month(s) used | latitude range | solar zenith angle range |
|-----------------------------------|---------------|----------------|--------------------------|
| Northern polar winter day         | Jan, Feb      | 65°N – 90°N    | < 90°                    |
| Northern polar winter night       | Jan, Feb      | 65°N – 90°N    | > 95°                    |
| Northern polar spring day         | Apr           | 65°N – 90°N    | < 90°                    |
| Northern polar spring night       | Apr           | 65°N – 90°N    | > 95°                    |
| Northern polar summer day         | Jul, Aug      | 65°N – 90°N    | < 90°                    |
| Northern polar summer night       | Jul, Aug      | 65°N – 90°N    | > 95°                    |
| Northern polar autumn day         | Oct           | 65°N – 90°N    | < 90°                    |
| Northern polar autumn night       | Oct           | 65°N – 90°N    | > 95°                    |
| Northern midlatitude winter day   | Jan, Feb      | 40°N – 60°N    | < 90°                    |
| Northern midlatitude winter night | Jan, Feb      | 40°N – 60°N    | > 95°                    |
| Northern midlatitude spring day   | Apr           | 40°N – 60°N    | < 90°                    |
| Northern midlatitude spring night | Apr           | 40°N – 60°N    | > 95°                    |
| Northern midlatitude summer day   | Jul, Aug      | 40°N – 60°N    | < 90°                    |
| Northern midlatitude summer night | Jul, Aug      | 40°N – 60°N    | > 95°                    |
| Northern midlatitude autumn day   | Oct           | 40°N – 60°N    | < 90°                    |
| Northern midlatitude autumn night | Oct           | 40°N – 60°N    | > 95°                    |
| Tropics day                       | Apr           | 20°S – 20°N    | < 90°                    |
| Tropics night                     | Apr           | 20°S – 20°N    | > 95°                    |
| Southern midlatitude winter day   | Jul, Aug      | 40°S – 60°S    | < 90°                    |
| Southern midlatitude winter night | Jul, Aug      | 40°S – 60°S    | > 95°                    |
| Southern midlatitude spring day   | Oct           | 40°S – 60°S    | < 90°                    |
| Southern midlatitude spring night | Oct           | 40°S – 60°S    | > 95°                    |
| Southern midlatitude summer day   | Jan, Feb      | 40°S – 60°S    | < 90°                    |
| Southern midlatitude summer night | Jan, Feb      | 40°S – 60°S    | > 95°                    |
| Southern midlatitude autumn day   | Apr           | 40°S – 60°S    | < 90°                    |
| Southern midlatitude autumn night | Apr           | 40°S – 60°S    | > 95°                    |
| Southern polar winter day         | Jul, Aug      | 65°S – 90°S    | < 90°                    |
| Southern polar winter night       | Jul, Aug      | 65°S – 90°S    | > 95°                    |
| Southern polar spring day         | Oct           | 65°S – 90°S    | < 90°                    |
| Southern polar spring night       | Oct           | 65°S – 90°S    | > 95°                    |
| Southern polar summer day         | Jan, Feb      | 65°S – 90°S    | < 90°                    |
| Southern polar summer night       | Jan, Feb      | 65°S – 90°S    | > 95°                    |
| Southern polar autumn day         | Apr           | 65°S – 90°S    | < 90°                    |
| Southern polar autumn night       | Apr           | 65°S – 90°S    | > 95°                    |

**Table S2.** HCFC-22 error budget for Northern polar winter day. All uncertainties are  $1\sigma$ .

| altitude<br>(km) | mean target<br>(pptv) | interf<br>(pptv) | ILS<br>(pptv) | shift<br>(pptv) | offset<br>(pptv) | gain<br>(pptv) | spectro<br>(pptv) | T+LOS<br>(pptv) | noise<br>(pptv) | random<br>(pptv) | syst<br>(pptv) | total<br>(pptv) |
|------------------|-----------------------|------------------|---------------|-----------------|------------------|----------------|-------------------|-----------------|-----------------|------------------|----------------|-----------------|
| 5                | 168.03                | 1.63             | 0.71          | 0.16            | 2.84             | 1.09           | 6.97              | 1.44            | 5.36            | 7.19             | 6.35           | 9.59            |
| 8                | 153.62                | 0.77             | 0.57          | 0.10            | 2.01             | 1.72           | 5.42              | 1.35            | 4.51            | 6.01             | 4.83           | 7.71            |
| 11               | 143.15                | 0.42             | 0.54          | 0.07            | 1.24             | 1.73           | 5.65              | 1.16            | 4.05            | 4.52             | 5.85           | 7.39            |
| 14               | 127.27                | 0.38             | 2.11          | 0.18            | 1.05             | 1.73           | 7.28              | 1.32            | 4.90            | 5.49             | 7.58           | 9.36            |
| 17               | 105.54                | 0.31             | 2.70          | 0.31            | 0.97             | 1.39           | 6.56              | 1.09            | 5.93            | 6.28             | 7.09           | 9.47            |
| 20               | 86.27                 | 0.25             | 1.84          | 0.40            | 0.95             | 1.12           | 5.09              | 0.69            | 6.96            | 7.20             | 5.36           | 8.97            |
| 23               | 76.31                 | 0.25             | 1.00          | 0.59            | 1.07             | 0.97           | 3.90              | 0.39            | 7.92            | 8.12             | 3.94           | 9.03            |
| 26               | 73.19                 | 0.30             | 0.85          | 0.89            | 1.98             | 0.91           | 3.49              | 0.30            | 8.70            | 9.07             | 3.46           | 9.71            |
| 29               | 71.21                 | 0.37             | 0.84          | 1.24            | 3.92             | 0.91           | 3.26              | 0.30            | 9.51            | 10.45            | 3.22           | 10.94           |
| 32               | 69.28                 | 0.48             | 0.80          | 1.59            | 6.42             | 0.97           | 2.99              | 0.34            | 11.02           | 12.92            | 3.01           | 13.27           |
| 35               | 66.69                 | 0.59             | 0.79          | 1.87            | 8.72             | 1.06           | 2.74              | 0.37            | 12.98           | 15.80            | 2.83           | 16.05           |
| 38               | 64.13                 | 0.66             | 0.83          | 2.06            | 10.49            | 1.15           | 2.54              | 0.41            | 14.71           | 18.23            | 2.71           | 18.43           |
| 41               | 61.53                 | 0.71             | 0.90          | 2.23            | 11.52            | 1.20           | 2.39              | 0.43            | 15.70           | 19.64            | 2.61           | 19.81           |

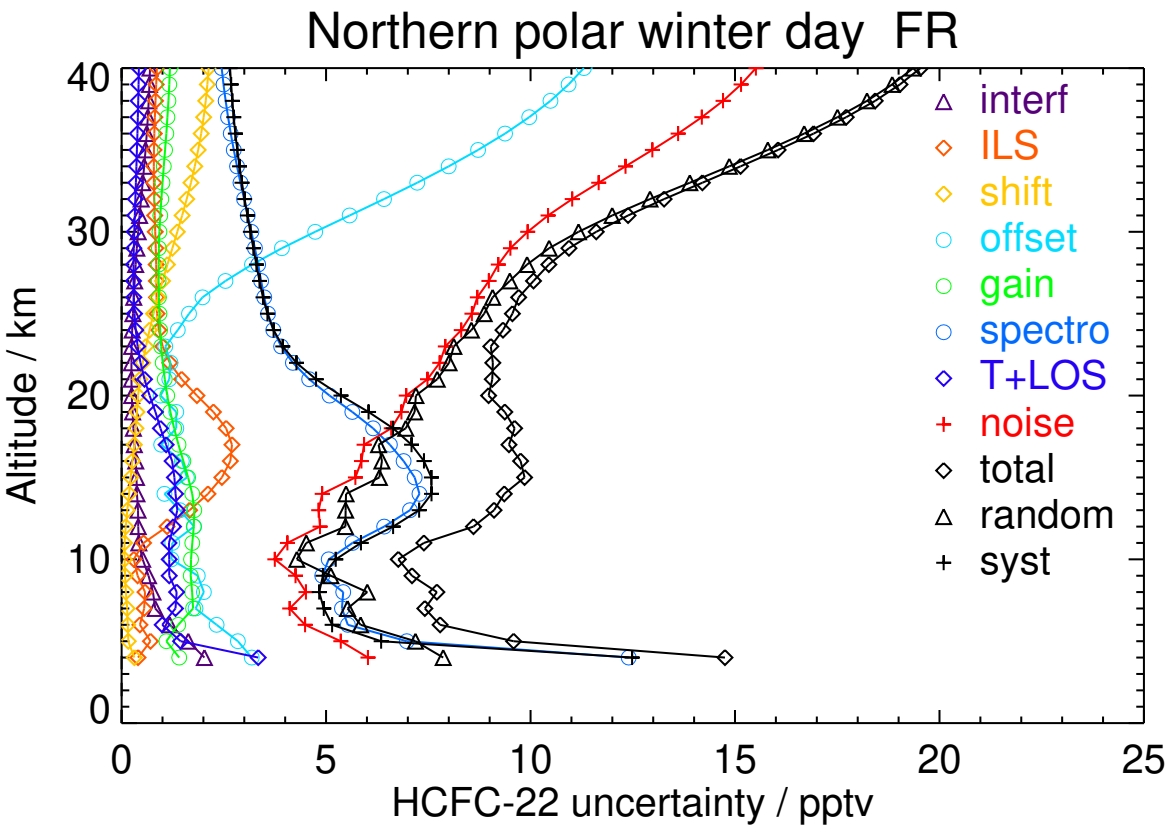

**Figure S1.** V8H\_F-22\_61 Northern polar winter day

**Table S3.** HCFC-22 error budget for Northern polar winter night. All uncertainties are  $1\sigma$ .

| altitude<br>(km) | mean target<br>(pptv) | interf<br>(pptv) | ILS<br>(pptv) | shift<br>(pptv) | offset<br>(pptv) | gain<br>(pptv) | spectro<br>(pptv) | T+LOS<br>(pptv) | noise<br>(pptv) | random<br>(pptv) | syst<br>(pptv) | total<br>(pptv) |
|------------------|-----------------------|------------------|---------------|-----------------|------------------|----------------|-------------------|-----------------|-----------------|------------------|----------------|-----------------|
| 5                | 162.61                | 1.64             | 0.85          | 0.20            | 2.90             | 0.63           | 8.26              | 1.82            | 5.37            | 7.02             | 7.96           | 10.62           |
| 8                | 156.16                | 0.38             | 0.25          | 0.14            | 1.03             | 2.39           | 5.44              | 1.56            | 3.18            | 3.96             | 5.78           | 7.01            |
| 11               | 143.25                | 0.46             | 0.65          | 0.08            | 0.79             | 1.85           | 5.92              | 1.09            | 3.87            | 4.39             | 6.05           | 7.48            |
| 14               | 123.65                | 0.38             | 2.27          | 0.19            | 0.89             | 1.74           | 7.78              | 1.48            | 4.94            | 5.44             | 8.15           | 9.80            |
| 17               | 100.79                | 0.32             | 2.66          | 0.23            | 1.00             | 1.23           | 6.46              | 1.14            | 6.08            | 6.47             | 6.93           | 9.48            |
| 20               | 82.54                 | 0.25             | 1.91          | 0.34            | 1.08             | 0.98           | 5.13              | 0.77            | 7.20            | 7.48             | 5.37           | 9.21            |
| 23               | 71.27                 | 0.26             | 1.10          | 0.59            | 1.25             | 0.79           | 3.92              | 0.48            | 8.10            | 8.36             | 3.90           | 9.22            |
| 26               | 68.49                 | 0.31             | 0.96          | 0.95            | 1.99             | 0.78           | 3.26              | 0.37            | 8.83            | 9.19             | 3.27           | 9.76            |
| 29               | 64.15                 | 0.38             | 0.99          | 1.38            | 3.71             | 0.82           | 2.89              | 0.35            | 9.44            | 10.32            | 2.93           | 10.73           |
| 32               | 58.07                 | 0.51             | 0.97          | 1.81            | 6.07             | 0.91           | 2.60              | 0.40            | 10.62           | 12.45            | 2.62           | 12.73           |
| 35               | 52.91                 | 0.63             | 0.93          | 2.13            | 8.38             | 1.01           | 2.34              | 0.44            | 12.40           | 15.19            | 2.38           | 15.38           |
| 38               | 48.96                 | 0.72             | 0.95          | 2.34            | 10.25            | 1.10           | 2.13              | 0.48            | 14.17           | 17.71            | 2.24           | 17.85           |
| 41               | 47.00                 | 0.77             | 0.99          | 2.46            | 11.43            | 1.17           | 2.02              | 0.50            | 15.34           | 19.35            | 2.19           | 19.48           |

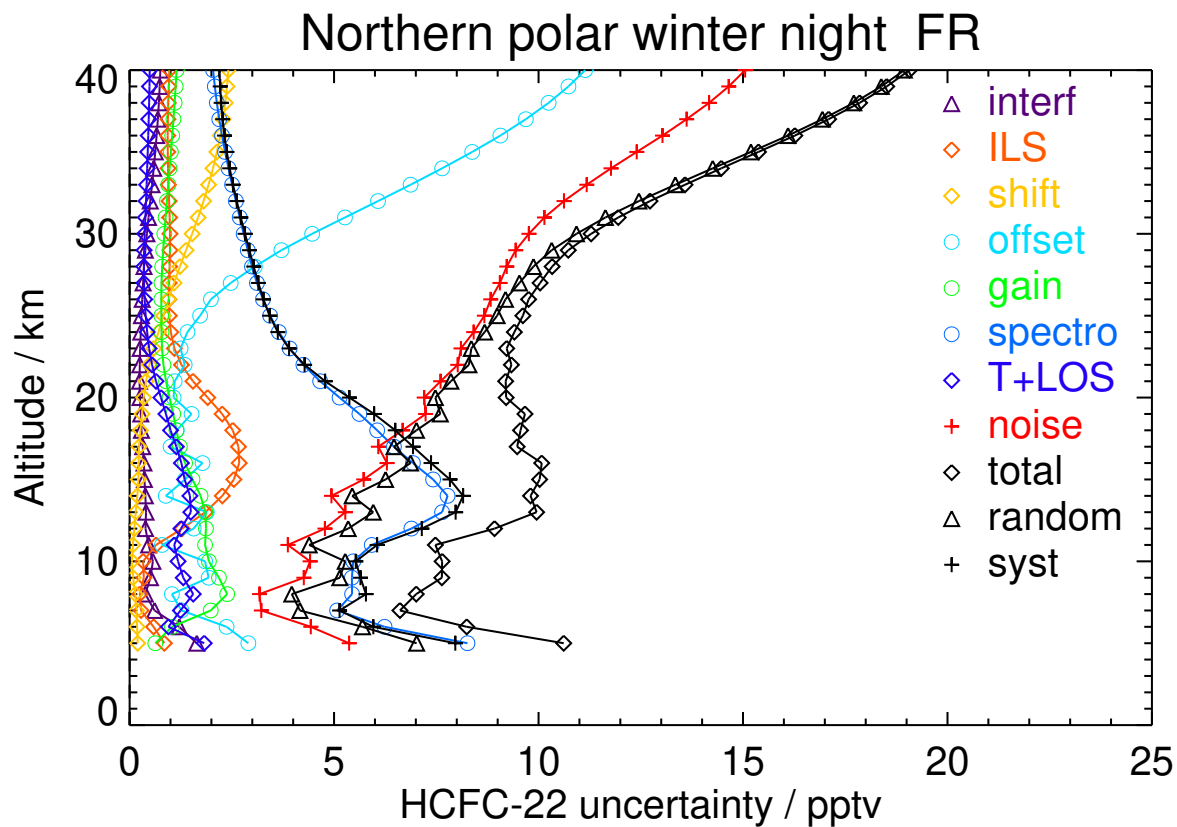

**Figure S2.** V8H\_F-22\_61 Northern polar winter night

**Table S4.** HCFC-22 error budget for Northern polar spring day. All uncertainties are  $1\sigma$ .

| altitude<br>(km) | mean target<br>(pptv) | interf<br>(pptv) | ILS<br>(pptv) | shift<br>(pptv) | offset<br>(pptv) | gain<br>(pptv) | spectro<br>(pptv) | T+LOS<br>(pptv) | noise<br>(pptv) | random<br>(pptv) | syst<br>(pptv) | total<br>(pptv) |
|------------------|-----------------------|------------------|---------------|-----------------|------------------|----------------|-------------------|-----------------|-----------------|------------------|----------------|-----------------|
| 8                | 151.36                | 0.81             | 0.63          | 0.08            | 2.01             | 1.23           | 5.33              | 0.99            | 3.99            | 5.27             | 4.91           | 7.20            |
| 11               | 139.39                | 0.41             | 0.39          | 0.05            | 2.01             | 1.96           | 6.17              | 1.29            | 4.41            | 5.11             | 6.42           | 8.21            |
| 14               | 115.09                | 0.34             | 2.15          | 0.14            | 1.89             | 1.71           | 7.23              | 1.31            | 5.18            | 5.83             | 7.62           | 9.60            |
| 17               | 88.26                 | 0.29             | 2.65          | 0.24            | 1.63             | 1.11           | 5.92              | 0.95            | 5.93            | 6.37             | 6.44           | 9.06            |
| 20               | 73.73                 | 0.24             | 1.57          | 0.33            | 1.39             | 0.91           | 3.77              | 0.48            | 6.69            | 7.00             | 3.93           | 8.03            |
| 23               | 75.05                 | 0.23             | 0.92          | 0.54            | 1.13             | 0.93           | 3.18              | 0.29            | 7.44            | 7.67             | 3.16           | 8.30            |
| 26               | 76.54                 | 0.29             | 0.96          | 0.83            | 1.37             | 1.01           | 3.27              | 0.28            | 8.19            | 8.45             | 3.32           | 9.08            |
| 29               | 75.83                 | 0.35             | 0.99          | 1.25            | 2.53             | 0.97           | 3.25              | 0.30            | 8.69            | 9.22             | 3.34           | 9.81            |
| 32               | 70.95                 | 0.44             | 0.94          | 1.77            | 4.59             | 1.03           | 3.02              | 0.35            | 9.30            | 10.58            | 3.18           | 11.04           |
| 35               | 64.68                 | 0.59             | 0.93          | 2.27            | 6.88             | 1.18           | 2.70              | 0.43            | 10.59           | 12.88            | 2.96           | 13.21           |
| 38               | 58.51                 | 0.73             | 1.00          | 2.68            | 8.93             | 1.33           | 2.41              | 0.51            | 12.34           | 15.51            | 2.81           | 15.76           |
| 41               | 53.95                 | 0.83             | 1.12          | 2.95            | 10.44            | 1.44           | 2.21              | 0.58            | 13.81           | 17.61            | 2.74           | 17.82           |

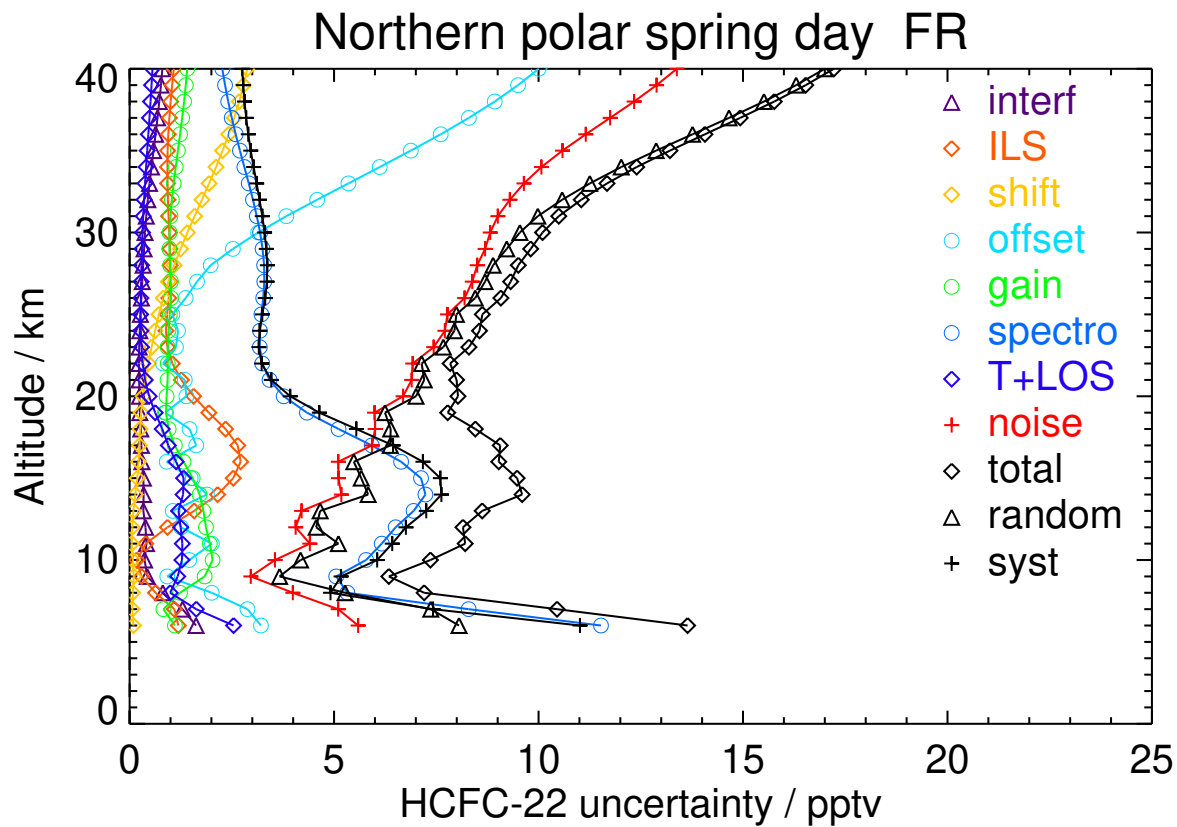

**Figure S3.** V8H\_F-22\_61 Northern polar spring day

**Table S5.** HCFC-22 error budget for Northern polar spring night. All uncertainties are  $1\sigma$ .

| altitude<br>(km) | mean target<br>(pptv) | interf<br>(pptv) | ILS<br>(pptv) | shift<br>(pptv) | offset<br>(pptv) | gain<br>(pptv) | spectro<br>(pptv) | T+LOS<br>(pptv) | noise<br>(pptv) | random<br>(pptv) | syst<br>(pptv) | total<br>(pptv) |
|------------------|-----------------------|------------------|---------------|-----------------|------------------|----------------|-------------------|-----------------|-----------------|------------------|----------------|-----------------|
| 8                | 151.29                | 0.93             | 0.89          | 0.08            | 2.29             | 1.19           | 5.65              | 1.07            | 4.39            | 6.01             | 4.97           | 7.79            |
| 11               | 137.20                | 0.40             | 0.65          | 0.04            | 2.01             | 1.93           | 6.20              | 1.26            | 4.40            | 5.14             | 6.42           | 8.23            |
| 14               | 116.68                | 0.34             | 2.20          | 0.15            | 1.82             | 1.62           | 7.13              | 1.24            | 5.15            | 5.81             | 7.49           | 9.48            |
| 17               | 93.57                 | 0.29             | 2.59          | 0.25            | 1.53             | 1.13           | 6.01              | 0.93            | 5.93            | 6.41             | 6.43           | 9.08            |
| 20               | 80.71                 | 0.23             | 1.52          | 0.33            | 1.27             | 1.02           | 4.19              | 0.51            | 6.69            | 7.04             | 4.25           | 8.23            |
| 23               | 80.37                 | 0.23             | 1.11          | 0.54            | 1.12             | 1.21           | 3.63              | 0.31            | 7.49            | 7.80             | 3.59           | 8.58            |
| 26               | 78.69                 | 0.28             | 0.99          | 0.79            | 1.47             | 1.04           | 3.61              | 0.29            | 8.32            | 8.61             | 3.63           | 9.34            |
| 29               | 72.49                 | 0.34             | 0.91          | 1.19            | 2.80             | 0.91           | 3.42              | 0.31            | 8.89            | 9.47             | 3.48           | 10.09           |
| 32               | 66.64                 | 0.44             | 0.84          | 1.70            | 4.96             | 0.97           | 3.06              | 0.36            | 9.59            | 10.98            | 3.17           | 11.43           |
| 35               | 62.10                 | 0.58             | 0.84          | 2.20            | 7.27             | 1.12           | 2.70              | 0.43            | 10.93           | 13.36            | 2.90           | 13.67           |
| 38               | 58.77                 | 0.72             | 0.93          | 2.62            | 9.30             | 1.28           | 2.42              | 0.52            | 12.65           | 15.97            | 2.73           | 16.20           |
| 41               | 56.30                 | 0.83             | 1.05          | 2.90            | 10.79            | 1.39           | 2.23              | 0.58            | 14.07           | 18.02            | 2.67           | 18.22           |

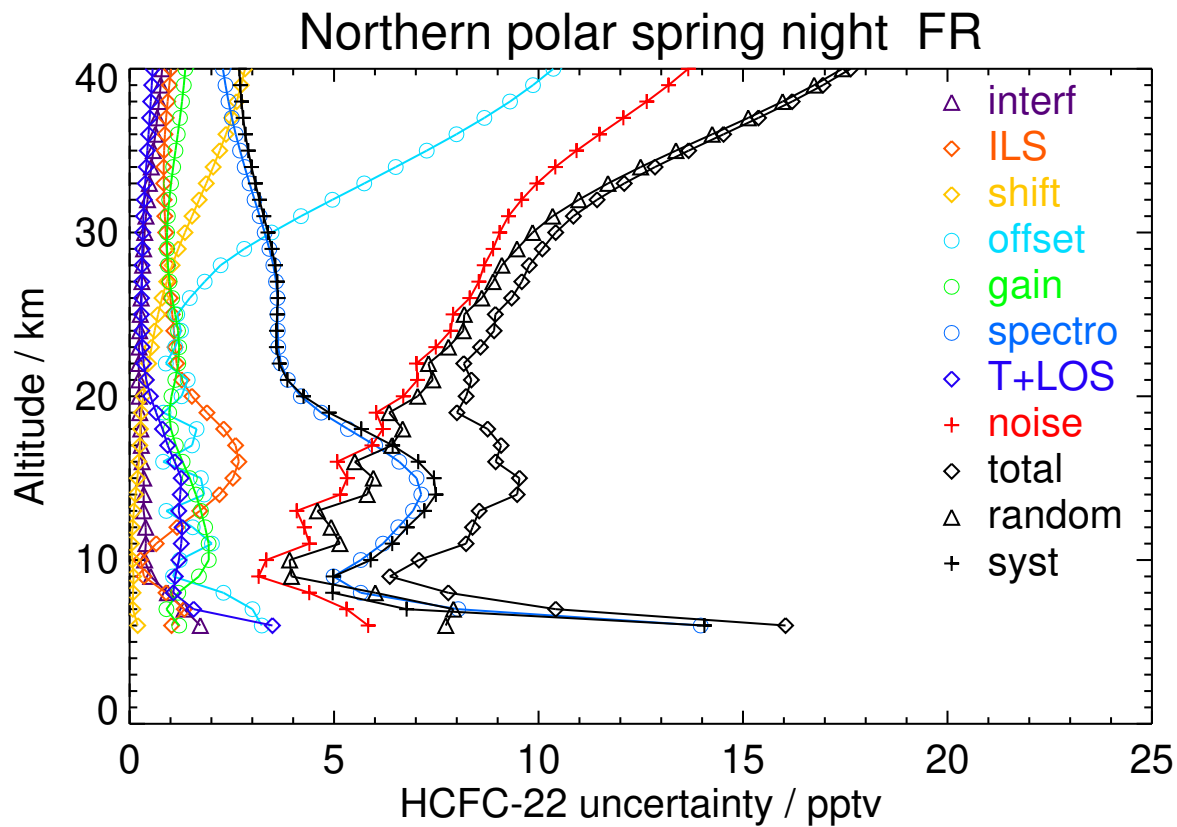

**Figure S4.** V8H\_F-22\_61 Northern polar spring night

**Table S6.** HCFC-22 error budget for Northern polar summer day. All uncertainties are  $1\sigma$ .

| altitude<br>(km) | mean target<br>(pptv) | interf<br>(pptv) | ILS<br>(pptv) | shift<br>(pptv) | offset<br>(pptv) | gain<br>(pptv) | spectro<br>(pptv) | T+LOS<br>(pptv) | noise<br>(pptv) | random<br>(pptv) | syst<br>(pptv) | total<br>(pptv) |
|------------------|-----------------------|------------------|---------------|-----------------|------------------|----------------|-------------------|-----------------|-----------------|------------------|----------------|-----------------|
| 8                | 152.13                | 1.32             | 1.77          | 0.11            | 2.66             | 1.52           | 12.56             | 2.80            | 5.37            | 8.86             | 11.41          | 14.44           |
| 11               | 151.56                | 0.38             | 0.65          | 0.06            | 0.95             | 1.71           | 5.10              | 0.92            | 3.28            | 3.88             | 5.19           | 6.48            |
| 14               | 140.82                | 0.37             | 1.27          | 0.10            | 0.88             | 1.72           | 6.01              | 0.94            | 4.21            | 4.55             | 6.29           | 7.76            |
| 17               | 125.87                | 0.30             | 2.92          | 0.26            | 0.91             | 1.66           | 7.30              | 1.08            | 5.20            | 5.50             | 7.98           | 9.69            |
| 20               | 104.83                | 0.24             | 2.00          | 0.35            | 0.91             | 1.21           | 5.80              | 0.74            | 6.18            | 6.36             | 6.18           | 8.87            |
| 23               | 92.17                 | 0.22             | 1.03          | 0.47            | 0.86             | 1.04           | 4.62              | 0.43            | 7.12            | 7.23             | 4.80           | 8.68            |
| 26               | 84.76                 | 0.26             | 1.04          | 0.72            | 1.10             | 0.98           | 4.05              | 0.36            | 8.00            | 8.14             | 4.26           | 9.19            |
| 29               | 78.24                 | 0.33             | 1.02          | 1.16            | 2.05             | 0.92           | 3.62              | 0.35            | 8.60            | 8.94             | 3.84           | 9.73            |
| 32               | 72.29                 | 0.42             | 0.88          | 1.79            | 3.74             | 1.00           | 3.16              | 0.38            | 9.08            | 10.01            | 3.40           | 10.57           |
| 35               | 66.20                 | 0.57             | 0.79          | 2.47            | 5.74             | 1.20           | 2.77              | 0.45            | 10.08           | 11.89            | 3.08           | 12.28           |
| 38               | 61.52                 | 0.74             | 0.84          | 3.05            | 7.64             | 1.41           | 2.46              | 0.54            | 11.63           | 14.29            | 2.90           | 14.58           |
| 41               | 58.47                 | 0.87             | 0.97          | 3.47            | 9.12             | 1.56           | 2.26              | 0.62            | 13.14           | 16.41            | 2.84           | 16.66           |

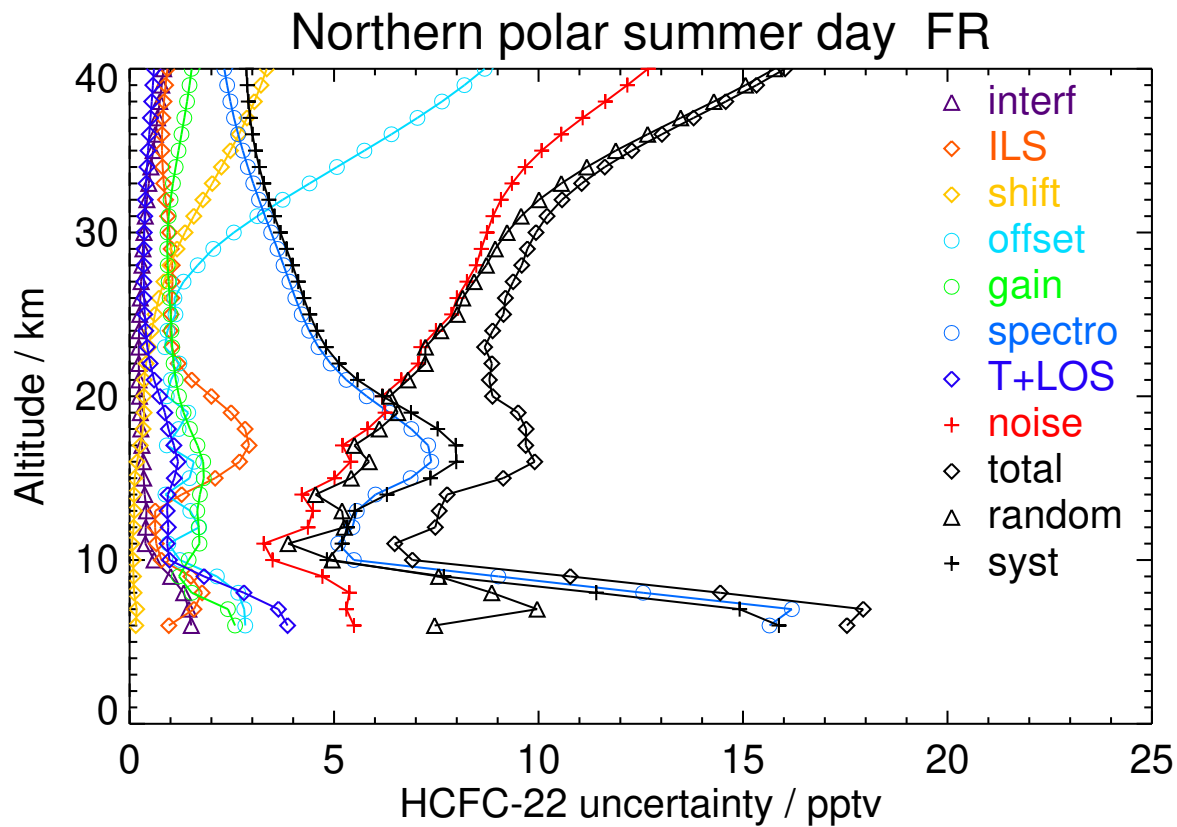

**Figure S5.** V8H\_F-22\_61 Northern polar summer day

**Table S7.** HCFC-22 error budget for Northern polar summer night. All uncertainties are  $1\sigma$ .

| altitude<br>(km) | mean target<br>(pptv) | interf<br>(pptv) | ILS<br>(pptv) | shift<br>(pptv) | offset<br>(pptv) | gain<br>(pptv) | spectro<br>(pptv) | T+LOS<br>(pptv) | noise<br>(pptv) | random<br>(pptv) | syst<br>(pptv) | total<br>(pptv) |
|------------------|-----------------------|------------------|---------------|-----------------|------------------|----------------|-------------------|-----------------|-----------------|------------------|----------------|-----------------|
| 8                | 154.99                | 1.48             | 2.25          | 0.08            | 2.93             | 1.51           | 14.77             | 3.56            | 5.92            | 8.37             | 14.63          | 16.85           |
| 11               | 153.21                | 0.39             | 0.32          | 0.04            | 0.69             | 1.68           | 5.16              | 0.88            | 3.06            | 3.74             | 5.13           | 6.35            |
| 14               | 142.97                | 0.38             | 1.15          | 0.08            | 0.73             | 1.71           | 6.06              | 0.95            | 4.18            | 4.51             | 6.30           | 7.75            |
| 17               | 127.80                | 0.31             | 3.10          | 0.22            | 0.93             | 1.79           | 7.64              | 1.18            | 5.24            | 5.51             | 8.40           | 10.05           |
| 20               | 104.85                | 0.24             | 2.32          | 0.32            | 1.00             | 1.29           | 6.15              | 0.82            | 6.33            | 6.51             | 6.66           | 9.31            |
| 23               | 90.37                 | 0.23             | 1.08          | 0.47            | 1.01             | 1.03           | 4.78              | 0.47            | 7.30            | 7.43             | 4.97           | 8.94            |
| 26               | 81.68                 | 0.26             | 0.91          | 0.70            | 1.18             | 0.89           | 4.01              | 0.36            | 8.18            | 8.32             | 4.19           | 9.31            |
| 29               | 75.19                 | 0.33             | 0.90          | 1.15            | 2.25             | 0.85           | 3.50              | 0.35            | 8.74            | 9.12             | 3.69           | 9.84            |
| 32               | 67.49                 | 0.43             | 0.79          | 1.75            | 4.06             | 0.93           | 3.00              | 0.38            | 9.28            | 10.30            | 3.21           | 10.79           |
| 35               | 60.63                 | 0.58             | 0.71          | 2.35            | 6.12             | 1.12           | 2.57              | 0.46            | 10.41           | 12.33            | 2.85           | 12.66           |
| 38               | 55.41                 | 0.73             | 0.73          | 2.86            | 8.02             | 1.31           | 2.25              | 0.55            | 12.05           | 14.79            | 2.65           | 15.03           |
| 41               | 51.88                 | 0.84             | 0.83          | 3.21            | 9.47             | 1.45           | 2.04              | 0.63            | 13.56           | 16.89            | 2.58           | 17.08           |

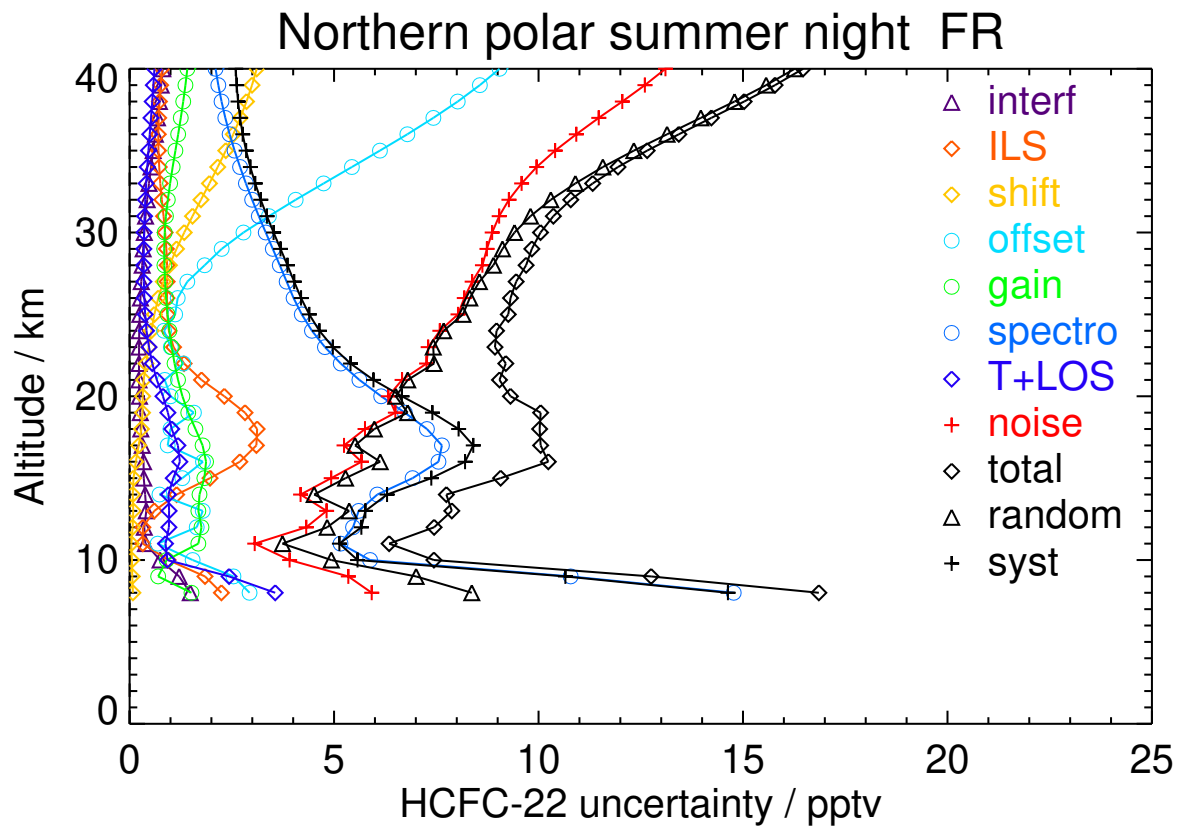

**Figure S6.** V8H\_F-22\_61 Northern polar summer night



**Table S8.** HCFC-22 error budget for Northern polar autumn day. All uncertainties are  $1\sigma$ .

| altitude<br>(km) | mean target<br>(pptv) | interf<br>(pptv) | ILS<br>(pptv) | shift<br>(pptv) | offset<br>(pptv) | gain<br>(pptv) | spectro<br>(pptv) | T+LOS<br>(pptv) | noise<br>(pptv) | random<br>(pptv) | syst<br>(pptv) | total<br>(pptv) |
|------------------|-----------------------|------------------|---------------|-----------------|------------------|----------------|-------------------|-----------------|-----------------|------------------|----------------|-----------------|
| 8                | 162.26                | 0.60             | 0.41          | 0.15            | 1.39             | 1.64           | 5.42              | 1.05            | 3.30            | 4.61             | 5.03           | 6.82            |
| 11               | 155.72                | 0.56             | 0.56          | 0.49            | 1.84             | 1.53           | 5.35              | 0.94            | 4.07            | 5.31             | 4.94           | 7.25            |
| 14               | 140.55                | 0.38             | 1.47          | 0.12            | 1.88             | 2.36           | 7.45              | 1.29            | 4.88            | 5.50             | 7.89           | 9.62            |
| 17               | 117.62                | 0.31             | 2.45          | 0.26            | 1.85             | 1.68           | 6.91              | 1.13            | 5.80            | 6.26             | 7.48           | 9.75            |
| 20               | 101.51                | 0.24             | 2.06          | 0.41            | 1.63             | 1.29           | 5.96              | 0.76            | 6.82            | 7.14             | 6.35           | 9.56            |
| 23               | 90.10                 | 0.23             | 1.23          | 0.50            | 1.42             | 1.18           | 4.84              | 0.49            | 7.83            | 8.03             | 5.05           | 9.49            |
| 26               | 82.18                 | 0.27             | 0.88          | 0.62            | 2.29             | 1.06           | 4.22              | 0.37            | 8.71            | 9.07             | 4.39           | 10.07           |
| 29               | 74.71                 | 0.33             | 0.77          | 0.82            | 4.58             | 0.97           | 3.75              | 0.33            | 9.71            | 10.80            | 3.91           | 11.48           |
| 32               | 66.16                 | 0.42             | 0.80          | 1.09            | 7.47             | 0.95           | 3.31              | 0.36            | 11.39           | 13.69            | 3.48           | 14.13           |
| 35               | 59.41                 | 0.53             | 0.90          | 1.33            | 10.06            | 0.97           | 2.94              | 0.42            | 13.37           | 16.81            | 3.15           | 17.10           |
| 38               | 54.59                 | 0.62             | 1.03          | 1.51            | 12.04            | 1.01           | 2.66              | 0.48            | 15.04           | 19.36            | 2.93           | 19.58           |
| 41               | 49.56                 | 0.70             | 1.13          | 1.75            | 13.02            | 1.03           | 2.37              | 0.53            | 15.88           | 20.64            | 2.72           | 20.82           |

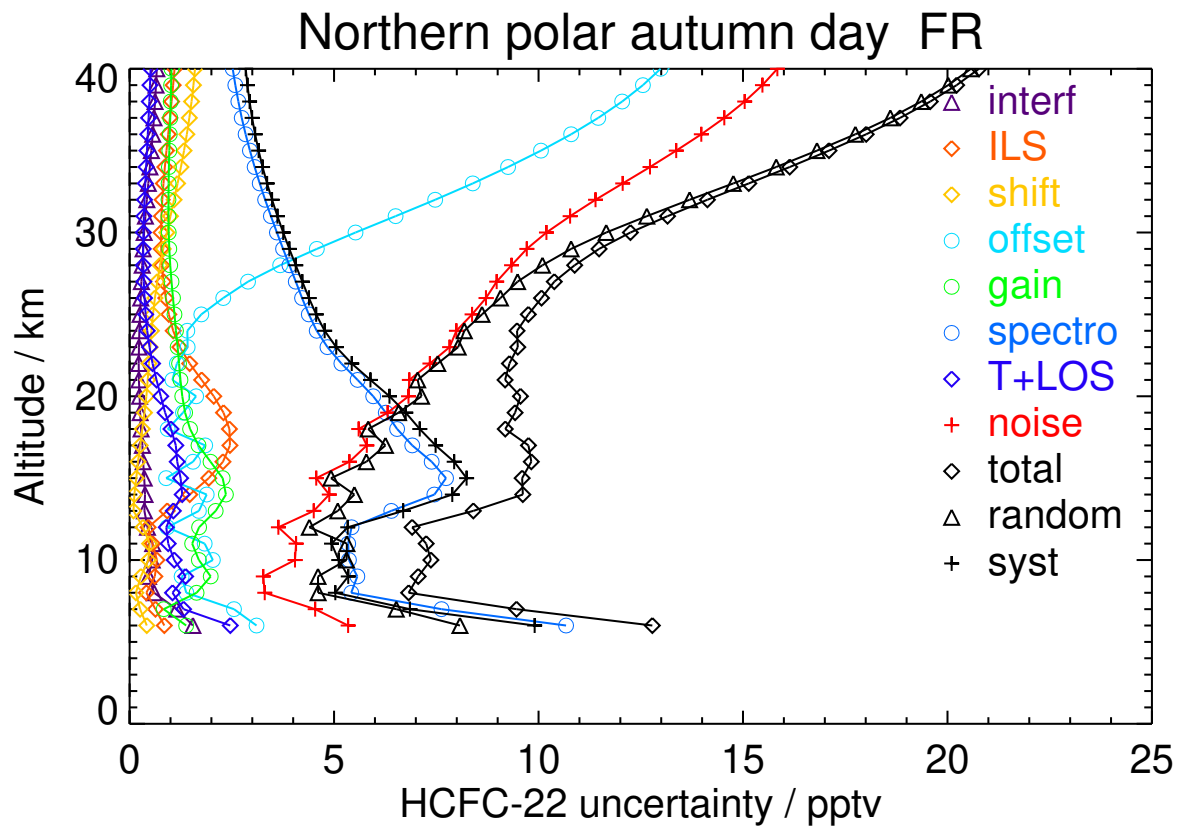

**Figure S7.** V8H\_F-22\_61 Northern polar autumn day

**Table S9.** HCFC-22 error budget for Northern polar autumn night. All uncertainties are  $1\sigma$ .

| altitude<br>(km) | mean target<br>(pptv) | interf<br>(pptv) | ILS<br>(pptv) | shift<br>(pptv) | offset<br>(pptv) | gain<br>(pptv) | spectro<br>(pptv) | T+LOS<br>(pptv) | noise<br>(pptv) | random<br>(pptv) | syst<br>(pptv) | total<br>(pptv) |
|------------------|-----------------------|------------------|---------------|-----------------|------------------|----------------|-------------------|-----------------|-----------------|------------------|----------------|-----------------|
| 8                | 160.23                | 0.67             | 0.46          | 0.14            | 1.54             | 1.47           | 5.77              | 1.09            | 3.50            | 5.14             | 5.05           | 7.21            |
| 11               | 152.81                | 0.52             | 0.43          | 0.12            | 1.94             | 1.69           | 5.24              | 0.97            | 4.22            | 5.10             | 5.23           | 7.30            |
| 14               | 137.88                | 0.38             | 1.50          | 0.10            | 1.99             | 2.29           | 7.44              | 1.28            | 5.02            | 5.63             | 7.88           | 9.68            |
| 17               | 112.85                | 0.31             | 2.47          | 0.27            | 1.88             | 1.68           | 6.90              | 1.12            | 5.98            | 6.46             | 7.46           | 9.86            |
| 20               | 95.99                 | 0.24             | 2.10          | 0.37            | 1.63             | 1.35           | 5.57              | 0.76            | 6.98            | 7.28             | 6.03           | 9.45            |
| 23               | 85.40                 | 0.23             | 1.26          | 0.47            | 1.44             | 1.10           | 4.57              | 0.49            | 7.93            | 8.13             | 4.81           | 9.44            |
| 26               | 76.28                 | 0.28             | 0.89          | 0.62            | 2.33             | 0.95           | 3.93              | 0.38            | 8.82            | 9.17             | 4.10           | 10.05           |
| 29               | 66.64                 | 0.34             | 0.77          | 0.86            | 4.55             | 0.90           | 3.30              | 0.34            | 9.78            | 10.85            | 3.46           | 11.38           |
| 32               | 58.90                 | 0.43             | 0.76          | 1.16            | 7.36             | 0.91           | 2.77              | 0.36            | 11.37           | 13.62            | 2.94           | 13.93           |
| 35               | 53.75                 | 0.54             | 0.83          | 1.43            | 9.91             | 0.95           | 2.40              | 0.42            | 13.28           | 16.66            | 2.61           | 16.86           |
| 38               | 50.22                 | 0.64             | 0.92          | 1.63            | 11.90            | 1.00           | 2.15              | 0.48            | 14.95           | 19.21            | 2.42           | 19.36           |
| 41               | 47.55                 | 0.71             | 0.99          | 1.87            | 12.89            | 1.05           | 1.92              | 0.53            | 15.78           | 20.50            | 2.27           | 20.62           |

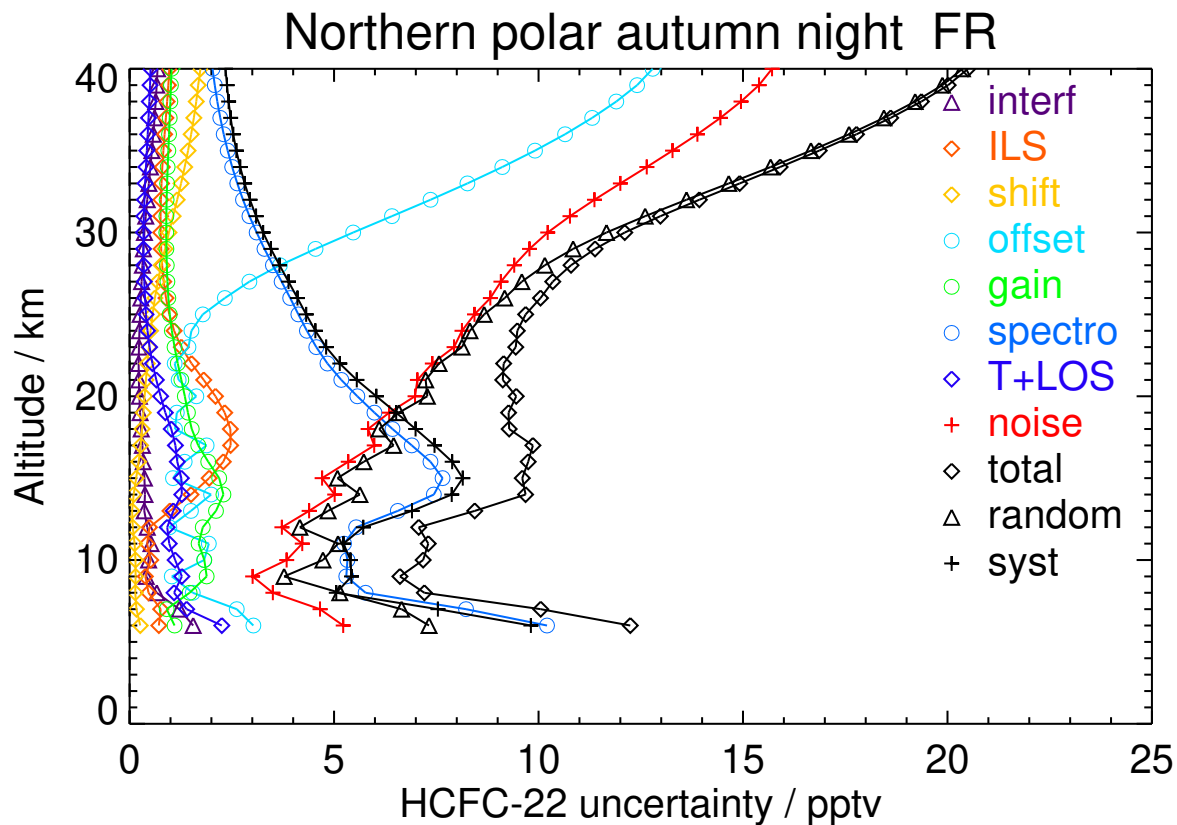

**Figure S8.** V8H\_F-22\_61 Northern polar autumn night

**Table S10.** HCFC-22 error budget for Northern midlatitude winter day. All uncertainties are  $1\sigma$ .

| altitude<br>(km) | mean target<br>(pptv) | interf<br>(pptv) | ILS<br>(pptv) | shift<br>(pptv) | offset<br>(pptv) | gain<br>(pptv) | spectro<br>(pptv) | T+LOS<br>(pptv) | noise<br>(pptv) | random<br>(pptv) | syst<br>(pptv) | total<br>(pptv) |
|------------------|-----------------------|------------------|---------------|-----------------|------------------|----------------|-------------------|-----------------|-----------------|------------------|----------------|-----------------|
| 5                | 161.54                | 1.65             | 0.63          | 0.25            | 3.01             | 1.12           | 9.83              | 2.48            | 5.51            | 7.62             | 9.41           | 12.11           |
| 8                | 158.43                | 0.60             | 0.56          | 0.15            | 1.59             | 2.08           | 5.74              | 1.59            | 3.92            | 5.57             | 5.23           | 7.64            |
| 11               | 144.98                | 0.46             | 0.40          | 0.07            | 0.92             | 1.60           | 5.35              | 1.05            | 3.80            | 4.29             | 5.43           | 6.92            |
| 14               | 130.33                | 0.37             | 1.89          | 0.11            | 0.76             | 1.92           | 7.17              | 1.27            | 4.60            | 4.99             | 7.57           | 9.06            |
| 17               | 115.04                | 0.30             | 2.54          | 0.29            | 0.71             | 1.44           | 6.41              | 1.00            | 5.54            | 5.79             | 6.96           | 9.05            |
| 20               | 101.51                | 0.24             | 1.83          | 0.43            | 0.80             | 1.26           | 5.46              | 0.67            | 6.60            | 6.82             | 5.75           | 8.92            |
| 23               | 95.80                 | 0.24             | 1.05          | 0.58            | 0.99             | 1.16           | 4.59              | 0.41            | 7.66            | 7.81             | 4.76           | 9.15            |
| 26               | 88.53                 | 0.28             | 0.99          | 0.80            | 1.71             | 1.05           | 4.28              | 0.35            | 8.59            | 8.84             | 4.45           | 9.90            |
| 29               | 80.62                 | 0.35             | 0.99          | 1.15            | 3.40             | 1.01           | 3.85              | 0.34            | 9.22            | 9.93             | 4.05           | 10.73           |
| 32               | 71.48                 | 0.45             | 0.93          | 1.56            | 5.73             | 1.04           | 3.37              | 0.37            | 10.34           | 11.95            | 3.59           | 12.48           |
| 35               | 64.79                 | 0.57             | 0.89          | 1.91            | 8.00             | 1.13           | 2.95              | 0.41            | 12.08           | 14.65            | 3.20           | 14.99           |
| 38               | 60.69                 | 0.68             | 0.92          | 2.16            | 9.85             | 1.23           | 2.64              | 0.46            | 13.86           | 17.17            | 2.96           | 17.43           |
| 41               | 58.23                 | 0.74             | 0.97          | 2.32            | 11.04            | 1.30           | 2.42              | 0.49            | 15.07           | 18.86            | 2.81           | 19.07           |

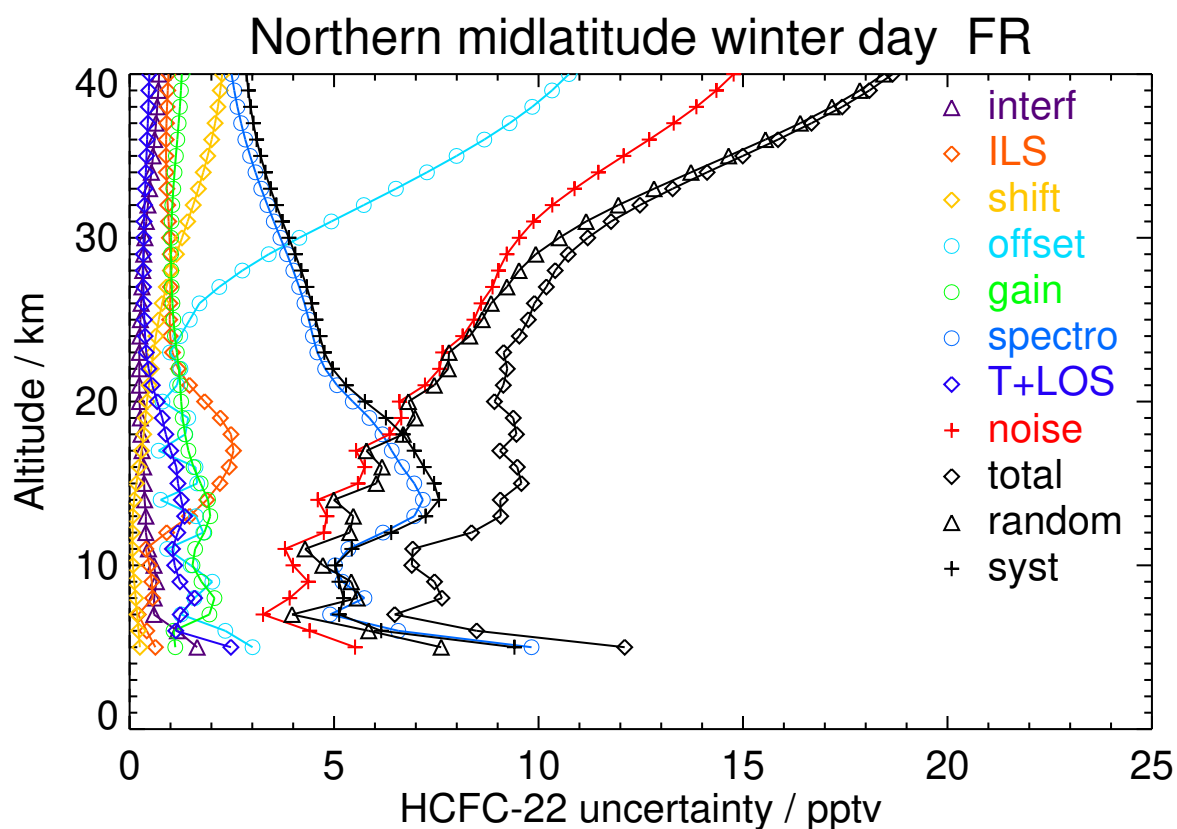**Figure S9.** V8H\_F-22\_61 Northern midlatitude winter day

**Table S11.** HCFC-22 error budget for Northern midlatitude winter night. All uncertainties are  $1\sigma$ .

| altitude<br>(km) | mean target<br>(pptv) | interf<br>(pptv) | ILS<br>(pptv) | shift<br>(pptv) | offset<br>(pptv) | gain<br>(pptv) | spectro<br>(pptv) | T+LOS<br>(pptv) | noise<br>(pptv) | random<br>(pptv) | syst<br>(pptv) | total<br>(pptv) |
|------------------|-----------------------|------------------|---------------|-----------------|------------------|----------------|-------------------|-----------------|-----------------|------------------|----------------|-----------------|
| 5                | 161.11                | 1.63             | 0.64          | 0.22            | 2.89             | 0.95           | 10.23             | 2.48            | 5.44            | 7.67             | 9.70           | 12.37           |
| 8                | 159.95                | 0.36             | 0.14          | 0.15            | 0.71             | 2.19           | 6.50              | 1.60            | 3.00            | 4.85             | 5.98           | 7.70            |
| 11               | 145.33                | 0.53             | 0.36          | 0.06            | 1.09             | 1.68           | 6.24              | 1.14            | 3.96            | 5.28             | 5.69           | 7.77            |
| 14               | 125.44                | 0.37             | 1.80          | 0.10            | 1.20             | 1.87           | 7.15              | 1.38            | 4.76            | 5.60             | 7.26           | 9.17            |
| 17               | 112.90                | 0.31             | 2.33          | 0.26            | 1.22             | 1.34           | 5.81              | 0.94            | 5.62            | 6.05             | 6.20           | 8.66            |
| 20               | 102.30                | 0.25             | 1.95          | 0.45            | 1.17             | 1.13           | 5.20              | 0.65            | 6.60            | 6.87             | 5.53           | 8.82            |
| 23               | 95.20                 | 0.24             | 1.11          | 0.61            | 1.05             | 0.99           | 4.49              | 0.39            | 7.55            | 7.73             | 4.61           | 9.00            |
| 26               | 92.47                 | 0.28             | 1.00          | 0.83            | 1.55             | 1.05           | 4.33              | 0.31            | 8.42            | 8.68             | 4.44           | 9.75            |
| 29               | 86.24                 | 0.34             | 1.02          | 1.12            | 3.19             | 1.05           | 4.06              | 0.31            | 9.11            | 9.76             | 4.24           | 10.64           |
| 32               | 78.49                 | 0.44             | 1.01          | 1.48            | 5.55             | 1.05           | 3.67              | 0.35            | 10.20           | 11.73            | 3.89           | 12.36           |
| 35               | 72.58                 | 0.56             | 1.03          | 1.81            | 7.88             | 1.11           | 3.39              | 0.40            | 11.91           | 14.46            | 3.55           | 14.88           |
| 38               | 68.29                 | 0.66             | 1.08          | 2.05            | 9.82             | 1.19           | 3.26              | 0.45            | 13.70           | 17.07            | 3.28           | 17.39           |
| 41               | 64.93                 | 0.73             | 1.15          | 2.19            | 11.15            | 1.25           | 3.23              | 0.48            | 15.02           | 18.95            | 3.12           | 19.20           |

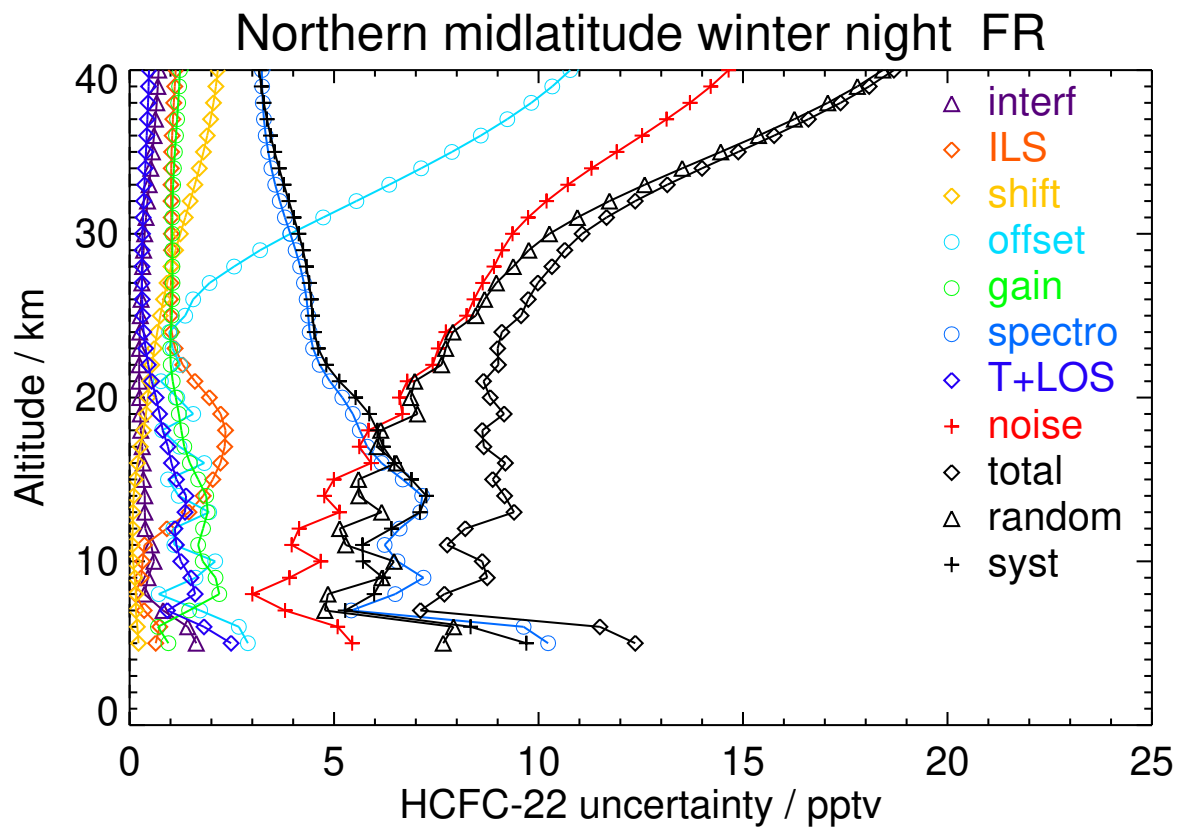

**Figure S10.** V8H\_F-22\_61 Northern midlatitude winter night

**Table S12.** HCFC-22 error budget for Northern midlatitude spring day. All uncertainties are  $1\sigma$ .

| altitude<br>(km) | mean target<br>(pptv) | interf<br>(pptv) | ILS<br>(pptv) | shift<br>(pptv) | offset<br>(pptv) | gain<br>(pptv) | spectro<br>(pptv) | T+LOS<br>(pptv) | noise<br>(pptv) | random<br>(pptv) | syst<br>(pptv) | total<br>(pptv) |
|------------------|-----------------------|------------------|---------------|-----------------|------------------|----------------|-------------------|-----------------|-----------------|------------------|----------------|-----------------|
| 8                | 153.74                | 0.90             | 0.65          | 0.32            | 2.17             | 1.08           | 6.36              | 0.99            | 4.10            | 5.87             | 5.56           | 8.09            |
| 11               | 146.84                | 0.48             | 0.70          | 0.11            | 2.15             | 1.85           | 5.40              | 1.02            | 4.45            | 5.73             | 5.09           | 7.66            |
| 14               | 133.42                | 0.36             | 1.69          | 0.10            | 1.94             | 1.81           | 6.76              | 1.14            | 5.07            | 5.69             | 7.09           | 9.09            |
| 17               | 117.21                | 0.30             | 2.78          | 0.27            | 1.63             | 1.48           | 7.23              | 1.07            | 5.92            | 6.35             | 7.80           | 10.05           |
| 20               | 100.15                | 0.24             | 2.07          | 0.31            | 1.32             | 1.47           | 5.71              | 0.72            | 6.72            | 7.07             | 6.06           | 9.31            |
| 23               | 92.70                 | 0.23             | 1.20          | 0.50            | 1.11             | 1.32           | 4.65              | 0.46            | 7.60            | 7.84             | 4.77           | 9.18            |
| 26               | 86.40                 | 0.28             | 0.95          | 0.72            | 1.57             | 1.01           | 4.22              | 0.36            | 8.42            | 8.69             | 4.29           | 9.69            |
| 29               | 80.55                 | 0.34             | 0.94          | 1.14            | 2.84             | 0.94           | 3.84              | 0.35            | 8.91            | 9.49             | 3.93           | 10.27           |
| 32               | 73.35                 | 0.43             | 0.98          | 1.73            | 4.90             | 1.01           | 3.38              | 0.39            | 9.50            | 10.88            | 3.55           | 11.44           |
| 35               | 68.45                 | 0.59             | 1.06          | 2.31            | 7.12             | 1.16           | 2.97              | 0.47            | 10.77           | 13.16            | 3.26           | 13.56           |
| 38               | 64.48                 | 0.74             | 1.19          | 2.77            | 9.10             | 1.32           | 2.65              | 0.55            | 12.47           | 15.73            | 3.08           | 16.03           |
| 41               | 61.05                 | 0.85             | 1.33          | 3.08            | 10.57            | 1.43           | 2.42              | 0.61            | 13.91           | 17.79            | 3.00           | 18.04           |

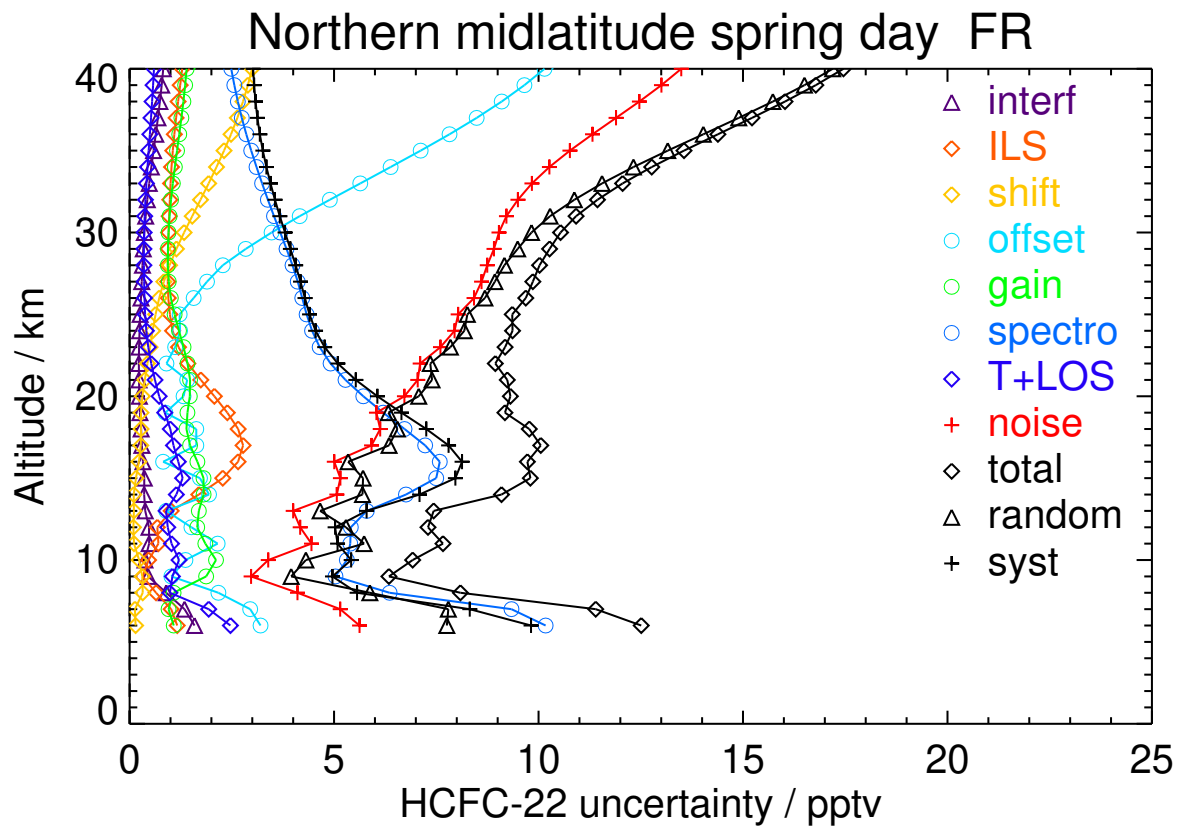

**Figure S11.** V8H\_F-22\_61 Northern midlatitude spring day

**Table S13.** HCFC-22 error budget for Northern midlatitude spring night. All uncertainties are  $1\sigma$ .

| altitude<br>(km) | mean target<br>(pptv) | interf<br>(pptv) | ILS<br>(pptv) | shift<br>(pptv) | offset<br>(pptv) | gain<br>(pptv) | spectro<br>(pptv) | T+LOS<br>(pptv) | noise<br>(pptv) | random<br>(pptv) | syst<br>(pptv) | total<br>(pptv) |
|------------------|-----------------------|------------------|---------------|-----------------|------------------|----------------|-------------------|-----------------|-----------------|------------------|----------------|-----------------|
| 8                | 151.36                | 0.95             | 0.86          | 0.12            | 2.34             | 1.19           | 6.25              | 1.05            | 4.38            | 6.35             | 5.25           | 8.24            |
| 11               | 141.35                | 0.40             | 0.42          | 0.08            | 1.96             | 1.76           | 5.63              | 1.08            | 4.23            | 5.26             | 5.51           | 7.62            |
| 14               | 130.39                | 0.34             | 1.72          | 0.10            | 1.72             | 1.77           | 6.54              | 1.10            | 4.92            | 5.52             | 6.85           | 8.80            |
| 17               | 112.87                | 0.29             | 2.69          | 0.29            | 1.47             | 1.46           | 6.87              | 1.01            | 5.75            | 6.17             | 7.41           | 9.64            |
| 20               | 97.09                 | 0.24             | 1.71          | 0.33            | 1.23             | 1.07           | 5.38              | 0.64            | 6.60            | 6.88             | 5.60           | 8.87            |
| 23               | 90.68                 | 0.23             | 1.01          | 0.51            | 1.02             | 0.95           | 4.37              | 0.39            | 7.48            | 7.67             | 4.43           | 8.85            |
| 26               | 88.57                 | 0.27             | 0.95          | 0.73            | 1.41             | 0.93           | 4.05              | 0.33            | 8.28            | 8.48             | 4.18           | 9.46            |
| 29               | 84.03                 | 0.34             | 0.96          | 1.14            | 2.71             | 0.95           | 3.76              | 0.32            | 8.86            | 9.36             | 3.96           | 10.16           |
| 32               | 78.15                 | 0.43             | 0.91          | 1.69            | 4.78             | 1.06           | 3.37              | 0.36            | 9.46            | 10.76            | 3.61           | 11.34           |
| 35               | 71.94                 | 0.57             | 0.90          | 2.26            | 7.01             | 1.23           | 2.98              | 0.44            | 10.71           | 13.03            | 3.30           | 13.44           |
| 38               | 66.87                 | 0.73             | 0.98          | 2.72            | 9.00             | 1.40           | 2.67              | 0.54            | 12.40           | 15.61            | 3.10           | 15.91           |
| 41               | 63.75                 | 0.84             | 1.10          | 3.04            | 10.47            | 1.51           | 2.46              | 0.60            | 13.86           | 17.68            | 3.01           | 17.93           |

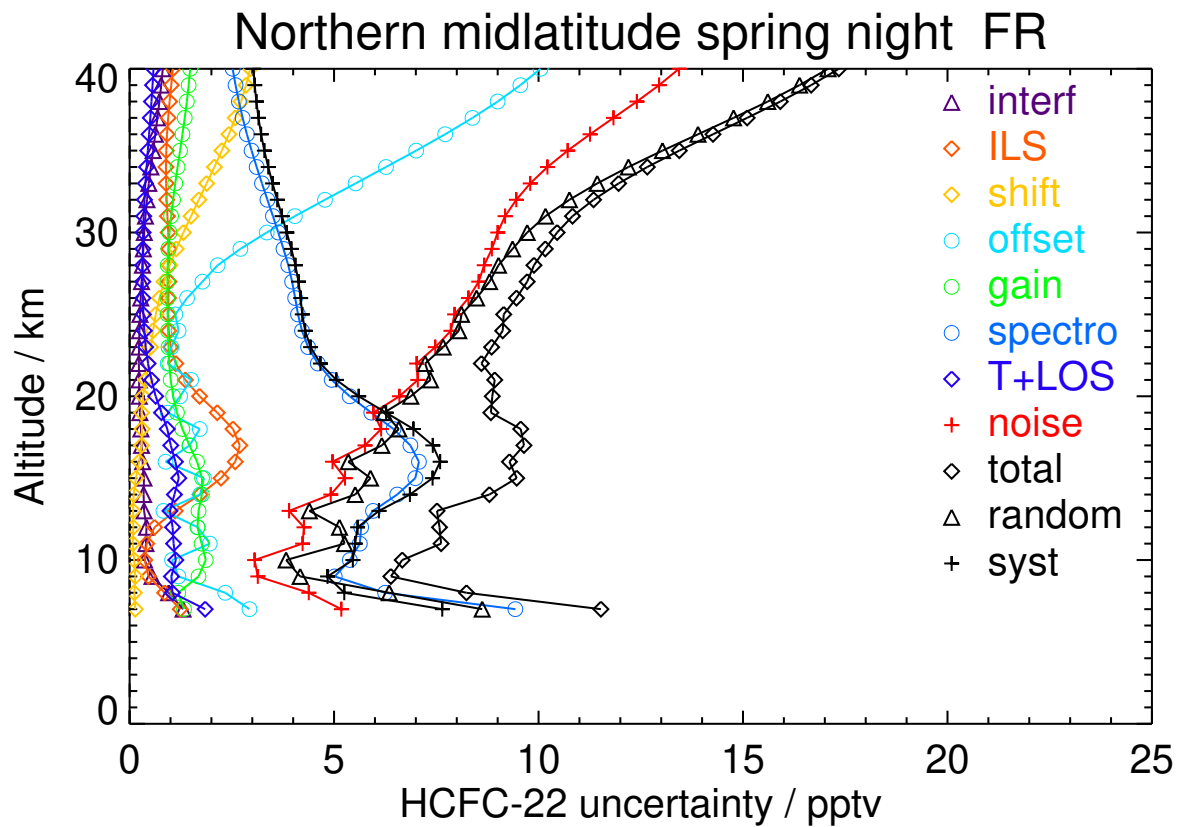

**Figure S12.** V8H\_F-22\_61 Northern midlatitude spring night

**Table S14.** HCFC-22 error budget for Northern midlatitude summer day. All uncertainties are  $1\sigma$ .

| altitude<br>(km) | mean target<br>(pptv) | interf<br>(pptv) | ILS<br>(pptv) | shift<br>(pptv) | offset<br>(pptv) | gain<br>(pptv) | spectro<br>(pptv) | T+LOS<br>(pptv) | noise<br>(pptv) | random<br>(pptv) | syst<br>(pptv) | total<br>(pptv) |
|------------------|-----------------------|------------------|---------------|-----------------|------------------|----------------|-------------------|-----------------|-----------------|------------------|----------------|-----------------|
| 8                | 157.62                | 1.33             | 1.17          | 0.24            | 2.70             | 1.25           | 8.66              | 2.08            | 5.51            | 7.95             | 7.64           | 11.03           |
| 11               | 162.83                | 0.45             | 1.27          | 0.41            | 1.06             | 1.88           | 5.27              | 1.08            | 3.34            | 4.43             | 5.21           | 6.83            |
| 14               | 153.83                | 0.48             | 0.68          | 0.17            | 0.79             | 1.41           | 5.22              | 0.79            | 4.29            | 5.01             | 4.96           | 7.05            |
| 17               | 138.06                | 0.35             | 3.40          | 0.28            | 0.81             | 1.97           | 9.33              | 1.41            | 5.44            | 5.84             | 10.04          | 11.62           |
| 20               | 117.11                | 0.25             | 2.66          | 0.26            | 0.84             | 1.40           | 7.43              | 1.02            | 6.39            | 6.63             | 7.93           | 10.34           |
| 23               | 99.80                 | 0.23             | 1.31          | 0.49            | 0.84             | 1.17           | 5.55              | 0.62            | 7.30            | 7.42             | 5.79           | 9.41            |
| 26               | 89.19                 | 0.27             | 1.10          | 0.76            | 1.15             | 0.94           | 4.53              | 0.43            | 8.07            | 8.22             | 4.72           | 9.48            |
| 29               | 82.65                 | 0.34             | 1.06          | 1.21            | 2.18             | 0.89           | 3.84              | 0.38            | 8.63            | 9.01             | 4.05           | 9.88            |
| 32               | 75.87                 | 0.44             | 0.95          | 1.79            | 3.96             | 1.01           | 3.28              | 0.38            | 9.11            | 10.12            | 3.53           | 10.72           |
| 35               | 70.25                 | 0.58             | 0.88          | 2.38            | 6.00             | 1.22           | 2.83              | 0.43            | 10.17           | 12.08            | 3.17           | 12.49           |
| 38               | 65.86                 | 0.72             | 0.93          | 2.86            | 7.91             | 1.43           | 2.50              | 0.49            | 11.81           | 14.54            | 2.97           | 14.84           |
| 41               | 62.62                 | 0.83             | 1.04          | 3.17            | 9.37             | 1.58           | 2.28              | 0.55            | 13.34           | 16.65            | 2.90           | 16.90           |

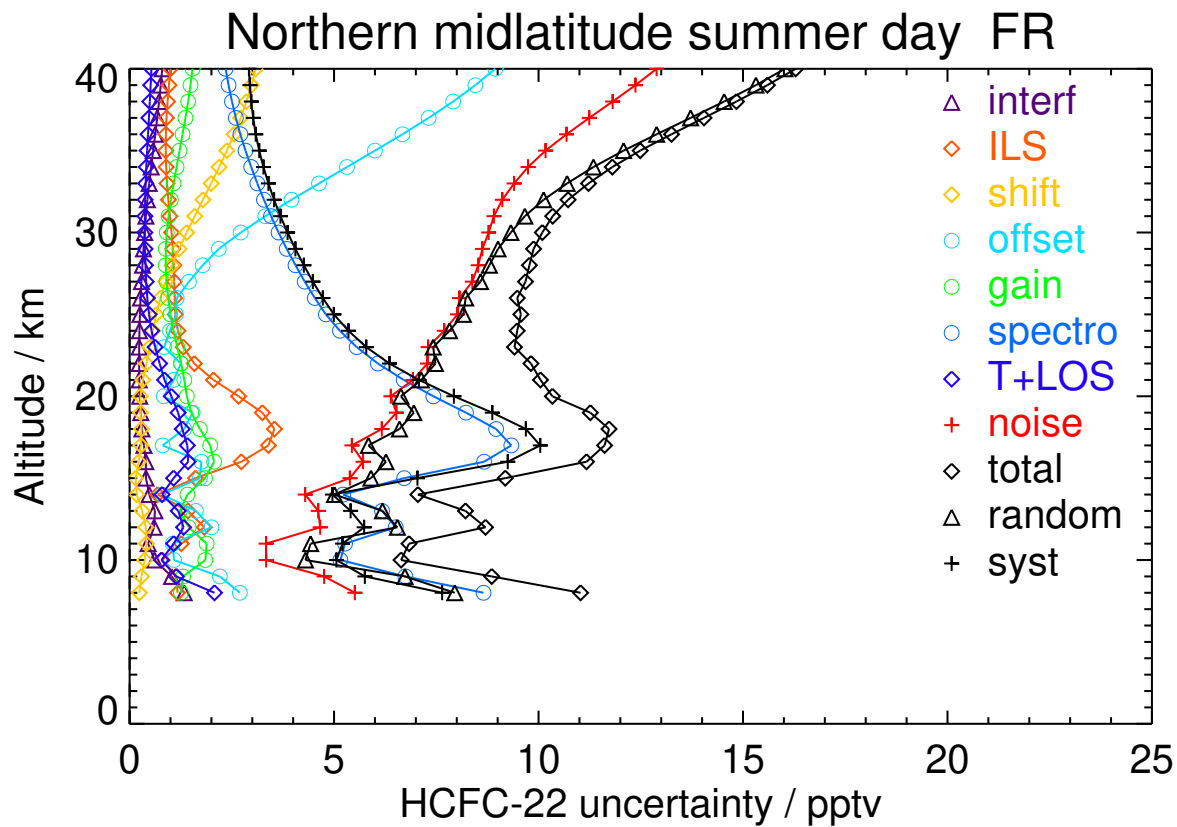

**Figure S13.** V8H\_F-22\_61 Northern midlatitude summer day

**Table S15.** HCFC-22 error budget for Northern midlatitude summer night. All uncertainties are  $1\sigma$ .

| altitude<br>(km) | mean target<br>(pptv) | interf<br>(pptv) | ILS<br>(pptv) | shift<br>(pptv) | offset<br>(pptv) | gain<br>(pptv) | spectro<br>(pptv) | T+LOS<br>(pptv) | noise<br>(pptv) | random<br>(pptv) | syst<br>(pptv) | total<br>(pptv) |
|------------------|-----------------------|------------------|---------------|-----------------|------------------|----------------|-------------------|-----------------|-----------------|------------------|----------------|-----------------|
| 8                | 166.11                | 1.37             | 1.01          | 0.17            | 2.71             | 1.23           | 9.27              | 2.37            | 5.87            | 8.30             | 8.30           | 11.74           |
| 11               | 164.75                | 0.43             | 0.68          | 0.11            | 0.68             | 1.74           | 5.17              | 0.96            | 3.14            | 3.78             | 5.23           | 6.45            |
| 14               | 153.18                | 0.53             | 0.83          | 0.10            | 0.78             | 1.20           | 5.26              | 0.83            | 4.27            | 5.25             | 4.70           | 7.05            |
| 17               | 135.83                | 0.35             | 3.14          | 0.22            | 1.04             | 1.77           | 8.96              | 1.48            | 5.49            | 5.95             | 9.56           | 11.26           |
| 20               | 113.13                | 0.25             | 2.81          | 0.25            | 1.12             | 1.29           | 7.48              | 1.07            | 6.49            | 6.77             | 8.02           | 10.50           |
| 23               | 95.42                 | 0.24             | 1.37          | 0.48            | 0.99             | 1.19           | 5.52              | 0.62            | 7.47            | 7.63             | 5.74           | 9.55            |
| 26               | 87.12                 | 0.27             | 1.02          | 0.71            | 1.22             | 0.94           | 4.37              | 0.42            | 8.26            | 8.41             | 4.56           | 9.57            |
| 29               | 82.64                 | 0.34             | 0.95          | 1.16            | 2.29             | 0.87           | 3.73              | 0.37            | 8.77            | 9.16             | 3.92           | 9.96            |
| 32               | 76.97                 | 0.44             | 0.85          | 1.73            | 4.12             | 0.97           | 3.22              | 0.39            | 9.33            | 10.37            | 3.43           | 10.92           |
| 35               | 71.96                 | 0.58             | 0.79          | 2.30            | 6.17             | 1.15           | 2.80              | 0.46            | 10.50           | 12.43            | 3.09           | 12.81           |
| 38               | 67.97                 | 0.73             | 0.83          | 2.76            | 8.07             | 1.33           | 2.50              | 0.54            | 12.17           | 14.90            | 2.90           | 15.18           |
| 41               | 64.56                 | 0.83             | 0.93          | 3.07            | 9.51             | 1.46           | 2.30              | 0.61            | 13.69           | 16.99            | 2.82           | 17.22           |

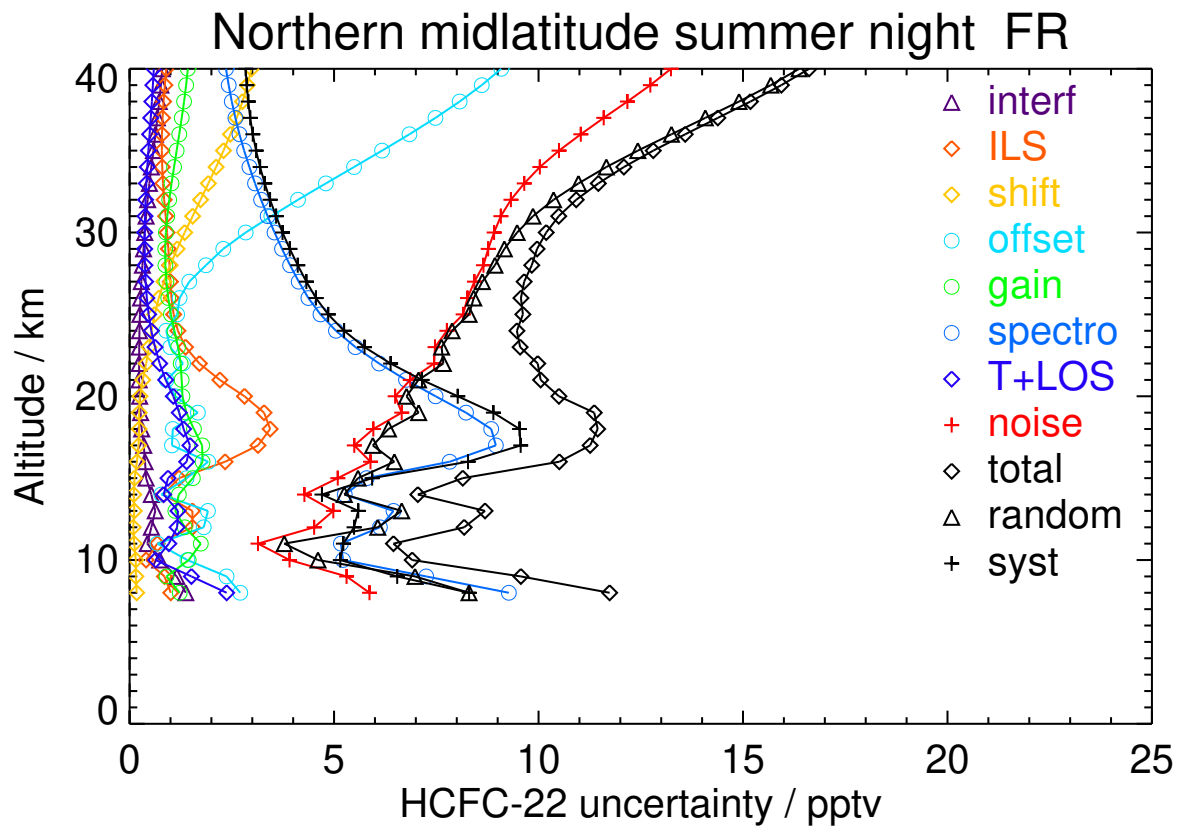

**Figure S14.** V8H\_F-22\_61 Northern midlatitude summer night



**Table S16.** HCFC-22 error budget for Northern midlatitude autumn day. All uncertainties are  $1\sigma$ .

| altitude<br>(km) | mean target<br>(pptv) | interf<br>(pptv) | ILS<br>(pptv) | shift<br>(pptv) | offset<br>(pptv) | gain<br>(pptv) | spectro<br>(pptv) | T+LOS<br>(pptv) | noise<br>(pptv) | random<br>(pptv) | syst<br>(pptv) | total<br>(pptv) |
|------------------|-----------------------|------------------|---------------|-----------------|------------------|----------------|-------------------|-----------------|-----------------|------------------|----------------|-----------------|
| 8                | 163.58                | 1.22             | 1.92          | 0.24            | 2.73             | 1.47           | 8.02              | 1.43            | 5.08            | 8.49             | 5.91           | 10.34           |
| 11               | 161.88                | 0.50             | 0.67          | 0.07            | 0.95             | 1.73           | 5.70              | 0.93            | 3.15            | 4.72             | 5.05           | 6.92            |
| 14               | 155.64                | 0.50             | 1.08          | 0.08            | 1.49             | 1.75           | 6.30              | 1.03            | 4.71            | 6.03             | 5.77           | 8.35            |
| 17               | 133.04                | 0.34             | 3.37          | 0.26            | 1.62             | 1.81           | 9.22              | 1.57            | 5.83            | 6.40             | 9.89           | 11.79           |
| 20               | 108.29                | 0.25             | 2.94          | 0.30            | 1.45             | 1.27           | 7.19              | 1.09            | 6.73            | 7.14             | 7.72           | 10.52           |
| 23               | 93.39                 | 0.23             | 1.46          | 0.49            | 1.25             | 1.14           | 5.13              | 0.60            | 7.59            | 7.81             | 5.34           | 9.47            |
| 26               | 87.41                 | 0.27             | 1.08          | 0.75            | 1.47             | 1.03           | 4.26              | 0.41            | 8.34            | 8.55             | 4.45           | 9.64            |
| 29               | 82.54                 | 0.33             | 0.99          | 1.10            | 2.85             | 0.95           | 3.80              | 0.34            | 8.81            | 9.35             | 4.01           | 10.18           |
| 32               | 78.37                 | 0.42             | 0.93          | 1.54            | 5.06             | 1.01           | 3.45              | 0.36            | 9.57            | 10.96            | 3.68           | 11.56           |
| 35               | 75.26                 | 0.55             | 0.92          | 1.96            | 7.44             | 1.14           | 3.15              | 0.42            | 11.04           | 13.48            | 3.43           | 13.91           |
| 38               | 72.99                 | 0.68             | 0.98          | 2.30            | 9.53             | 1.27           | 2.90              | 0.50            | 12.80           | 16.16            | 3.26           | 16.49           |
| 41               | 70.89                 | 0.76             | 1.08          | 2.51            | 11.04            | 1.37           | 2.71              | 0.55            | 14.23           | 18.23            | 3.16           | 18.50           |

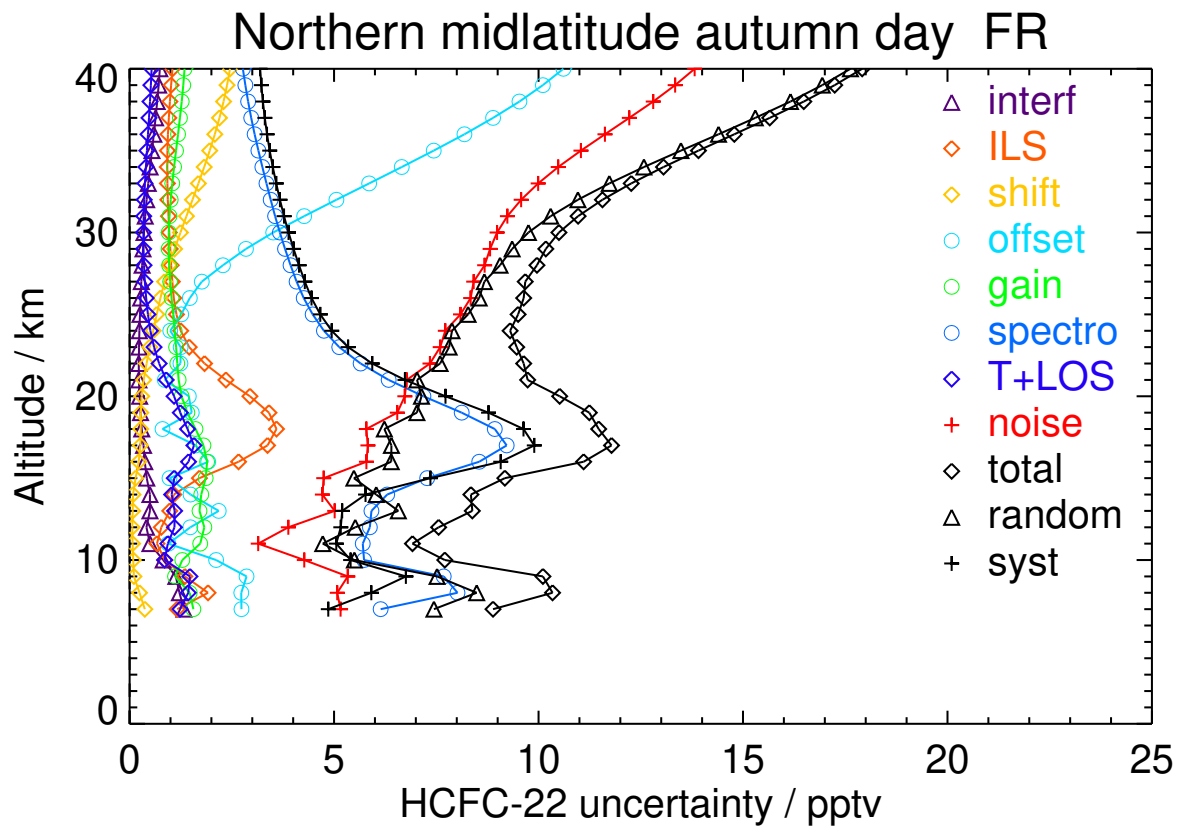

**Figure S15.** V8H\_F-22\_61 Northern midlatitude autumn day

**Table S17.** HCFC-22 error budget for Northern midlatitude autumn night. All uncertainties are  $1\sigma$ .

| altitude<br>(km) | mean target<br>(pptv) | interf<br>(pptv) | ILS<br>(pptv) | shift<br>(pptv) | offset<br>(pptv) | gain<br>(pptv) | spectro<br>(pptv) | T+LOS<br>(pptv) | noise<br>(pptv) | random<br>(pptv) | syst<br>(pptv) | total<br>(pptv) |
|------------------|-----------------------|------------------|---------------|-----------------|------------------|----------------|-------------------|-----------------|-----------------|------------------|----------------|-----------------|
| 8                | 162.14                | 0.77             | 0.45          | 0.19            | 1.78             | 1.78           | 6.31              | 1.10            | 3.74            | 5.87             | 5.27           | 7.89            |
| 11               | 157.40                | 0.57             | 0.63          | 0.14            | 1.57             | 1.59           | 5.33              | 0.91            | 3.78            | 5.02             | 4.91           | 7.02            |
| 14               | 147.99                | 0.40             | 1.23          | 0.12            | 1.77             | 2.01           | 6.86              | 1.15            | 4.82            | 5.48             | 7.11           | 8.98            |
| 17               | 126.63                | 0.32             | 2.83          | 0.24            | 1.74             | 1.76           | 7.72              | 1.28            | 5.85            | 6.38             | 8.31           | 10.47           |
| 20               | 108.69                | 0.24             | 2.69          | 0.35            | 1.57             | 1.47           | 6.40              | 0.90            | 6.80            | 7.16             | 6.99           | 10.00           |
| 23               | 98.67                 | 0.23             | 1.61          | 0.52            | 1.33             | 1.28           | 5.30              | 0.57            | 7.67            | 7.90             | 5.58           | 9.67            |
| 26               | 87.92                 | 0.27             | 1.12          | 0.72            | 1.63             | 1.02           | 4.58              | 0.42            | 8.44            | 8.67             | 4.76           | 9.90            |
| 29               | 80.66                 | 0.33             | 1.00          | 1.05            | 3.11             | 0.95           | 3.92              | 0.36            | 8.99            | 9.60             | 4.11           | 10.44           |
| 32               | 74.64                 | 0.43             | 0.97          | 1.47            | 5.41             | 0.97           | 3.37              | 0.37            | 9.84            | 11.36            | 3.58           | 11.91           |
| 35               | 68.73                 | 0.55             | 0.99          | 1.87            | 7.80             | 1.05           | 2.94              | 0.43            | 11.35           | 13.93            | 3.20           | 14.30           |
| 38               | 64.52                 | 0.68             | 1.06          | 2.19            | 9.86             | 1.15           | 2.63              | 0.50            | 13.10           | 16.59            | 2.96           | 16.85           |
| 41               | 61.83                 | 0.76             | 1.15          | 2.40            | 11.35            | 1.23           | 2.42              | 0.55            | 14.51           | 18.62            | 2.84           | 18.83           |

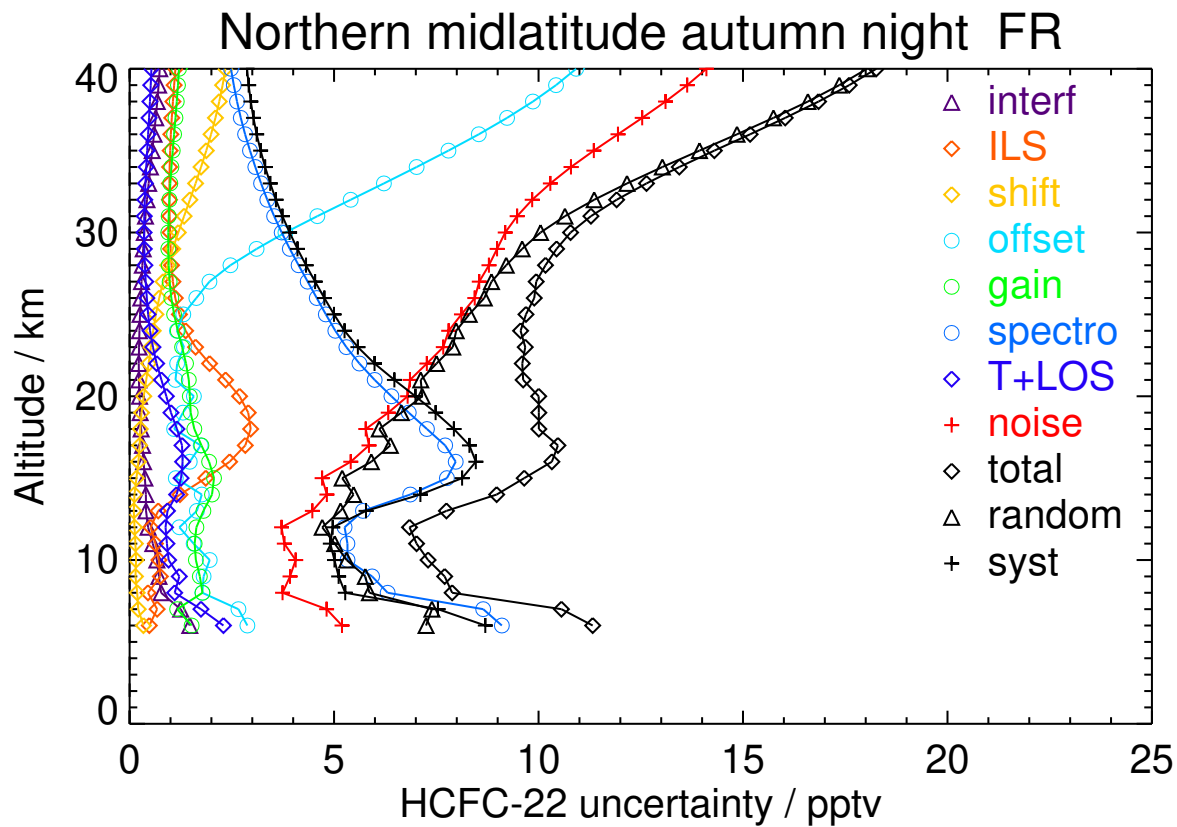

**Figure S16.** V8H\_F-22\_61 Northern midlatitude autumn night

**Table S18.** HCFC-22 error budget for Tropics day. All uncertainties are  $1\sigma$ .

| altitude<br>(km) | mean target<br>(pptv) | interf<br>(pptv) | ILS<br>(pptv) | shift<br>(pptv) | offset<br>(pptv) | gain<br>(pptv) | spectro<br>(pptv) | T+LOS<br>(pptv) | noise<br>(pptv) | random<br>(pptv) | syst<br>(pptv) | total<br>(pptv) |
|------------------|-----------------------|------------------|---------------|-----------------|------------------|----------------|-------------------|-----------------|-----------------|------------------|----------------|-----------------|
| 8                | 154.78                | 1.08             | 1.33          | 0.40            | 2.12             | 2.49           | 7.09              | 1.22            | 4.22            | 7.73             | 4.87           | 9.13            |
| 11               | 159.54                | 0.67             | 2.24          | 0.36            | 1.87             | 2.01           | 10.36             | 1.71            | 3.92            | 8.01             | 8.64           | 11.78           |
| 14               | 158.97                | 0.49             | 1.08          | 0.19            | 1.79             | 1.82           | 5.35              | 1.01            | 5.14            | 6.16             | 5.11           | 8.00            |
| 17               | 150.96                | 0.41             | 2.68          | 0.13            | 1.52             | 2.25           | 8.93              | 1.41            | 6.53            | 6.99             | 9.50           | 11.80           |
| 20               | 135.16                | 0.26             | 2.75          | 0.32            | 1.20             | 1.40           | 8.30              | 1.27            | 7.13            | 7.43             | 8.79           | 11.51           |
| 23               | 123.80                | 0.23             | 1.78          | 0.53            | 1.11             | 1.24           | 6.59              | 0.86            | 7.60            | 7.80             | 6.89           | 10.41           |
| 26               | 116.30                | 0.28             | 1.57          | 0.81            | 1.41             | 1.17           | 5.83              | 0.63            | 8.29            | 8.50             | 6.12           | 10.47           |
| 29               | 109.73                | 0.35             | 1.47          | 1.26            | 2.55             | 1.12           | 5.19              | 0.51            | 8.75            | 9.24             | 5.47           | 10.74           |
| 32               | 102.14                | 0.44             | 1.35          | 1.80            | 4.49             | 1.24           | 4.57              | 0.48            | 9.25            | 10.47            | 4.88           | 11.56           |
| 35               | 95.86                 | 0.58             | 1.28          | 2.35            | 6.67             | 1.41           | 4.04              | 0.52            | 10.41           | 12.62            | 4.42           | 13.37           |
| 38               | 89.76                 | 0.73             | 1.31          | 2.81            | 8.65             | 1.58           | 3.63              | 0.58            | 12.11           | 15.19            | 4.11           | 15.73           |
| 41               | 85.20                 | 0.84             | 1.41          | 3.09            | 10.11            | 1.69           | 3.34              | 0.64            | 13.59           | 17.27            | 3.92           | 17.71           |

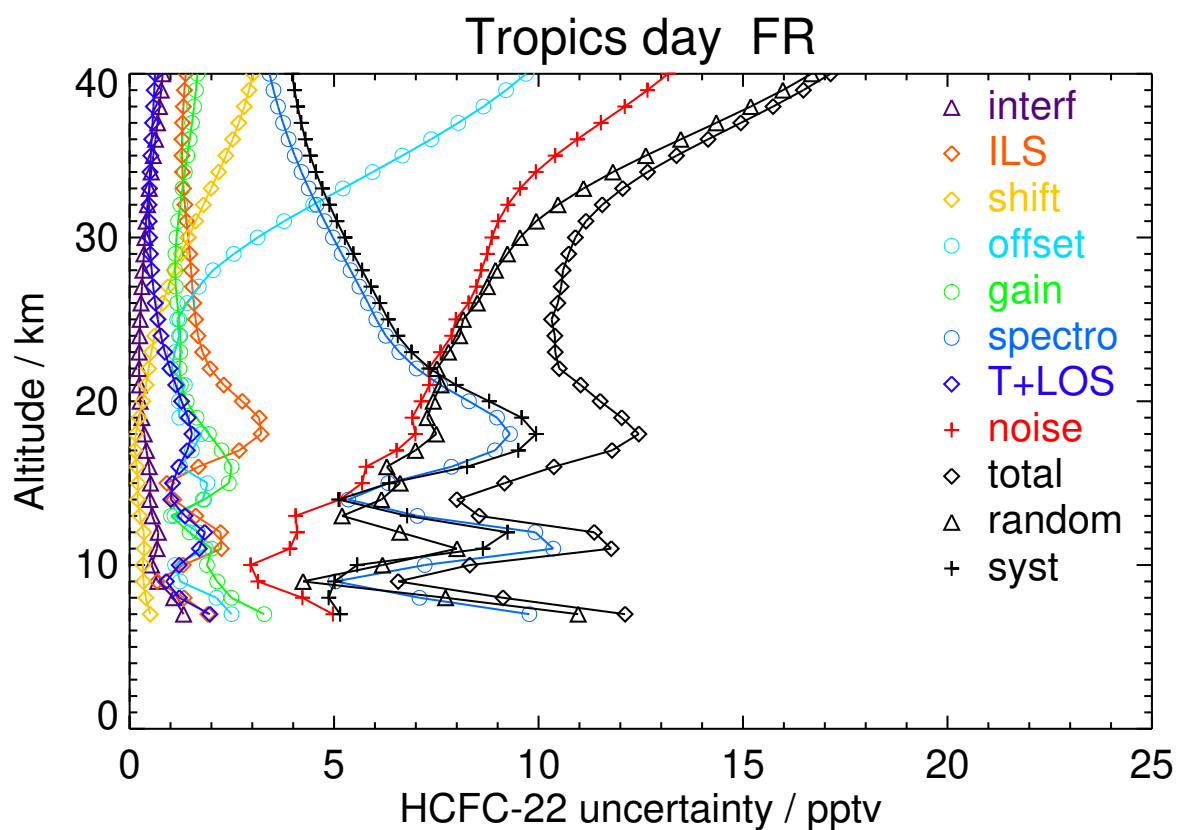**Figure S17.** V8H\_F-22\_61 Tropics day

**Table S19.** HCFC-22 error budget for Tropics night. All uncertainties are  $1\sigma$ .

| altitude<br>(km) | mean target<br>(pptv) | interf<br>(pptv) | ILS<br>(pptv) | shift<br>(pptv) | offset<br>(pptv) | gain<br>(pptv) | spectro<br>(pptv) | T+LOS<br>(pptv) | noise<br>(pptv) | random<br>(pptv) | syst<br>(pptv) | total<br>(pptv) |
|------------------|-----------------------|------------------|---------------|-----------------|------------------|----------------|-------------------|-----------------|-----------------|------------------|----------------|-----------------|
| 8                | 148.58                | 0.95             | 0.74          | 0.38            | 1.89             | 1.55           | 5.11              | 0.77            | 3.86            | 5.39             | 4.49           | 7.01            |
| 11               | 151.41                | 0.77             | 1.01          | 0.26            | 2.20             | 1.14           | 6.61              | 1.11            | 4.42            | 6.08             | 5.94           | 8.50            |
| 14               | 161.96                | 0.53             | 1.06          | 0.25            | 2.25             | 1.83           | 5.24              | 1.07            | 5.50            | 6.44             | 5.22           | 8.29            |
| 17               | 151.79                | 0.40             | 2.60          | 0.12            | 1.81             | 1.88           | 8.22              | 1.24            | 6.65            | 7.24             | 8.64           | 11.27           |
| 20               | 137.41                | 0.27             | 2.54          | 0.30            | 1.28             | 1.41           | 8.56              | 1.28            | 7.24            | 7.52             | 9.01           | 11.73           |
| 23               | 127.41                | 0.24             | 1.68          | 0.55            | 1.16             | 1.23           | 6.83              | 0.90            | 7.70            | 7.91             | 7.09           | 10.62           |
| 26               | 121.20                | 0.29             | 1.60          | 0.82            | 1.39             | 1.12           | 6.05              | 0.68            | 8.32            | 8.53             | 6.31           | 10.62           |
| 29               | 112.85                | 0.36             | 1.46          | 1.28            | 2.50             | 1.10           | 5.37              | 0.55            | 8.75            | 9.23             | 5.64           | 10.82           |
| 32               | 104.81                | 0.45             | 1.24          | 1.86            | 4.46             | 1.26           | 4.72              | 0.49            | 9.26            | 10.48            | 5.01           | 11.62           |
| 35               | 97.83                 | 0.60             | 1.11          | 2.44            | 6.65             | 1.48           | 4.17              | 0.52            | 10.39           | 12.61            | 4.53           | 13.40           |
| 38               | 92.10                 | 0.75             | 1.14          | 2.92            | 8.65             | 1.67           | 3.75              | 0.59            | 12.07           | 15.18            | 4.21           | 15.75           |
| 41               | 88.03                 | 0.86             | 1.24          | 3.23            | 10.15            | 1.80           | 3.45              | 0.64            | 13.56           | 17.29            | 4.03           | 17.76           |

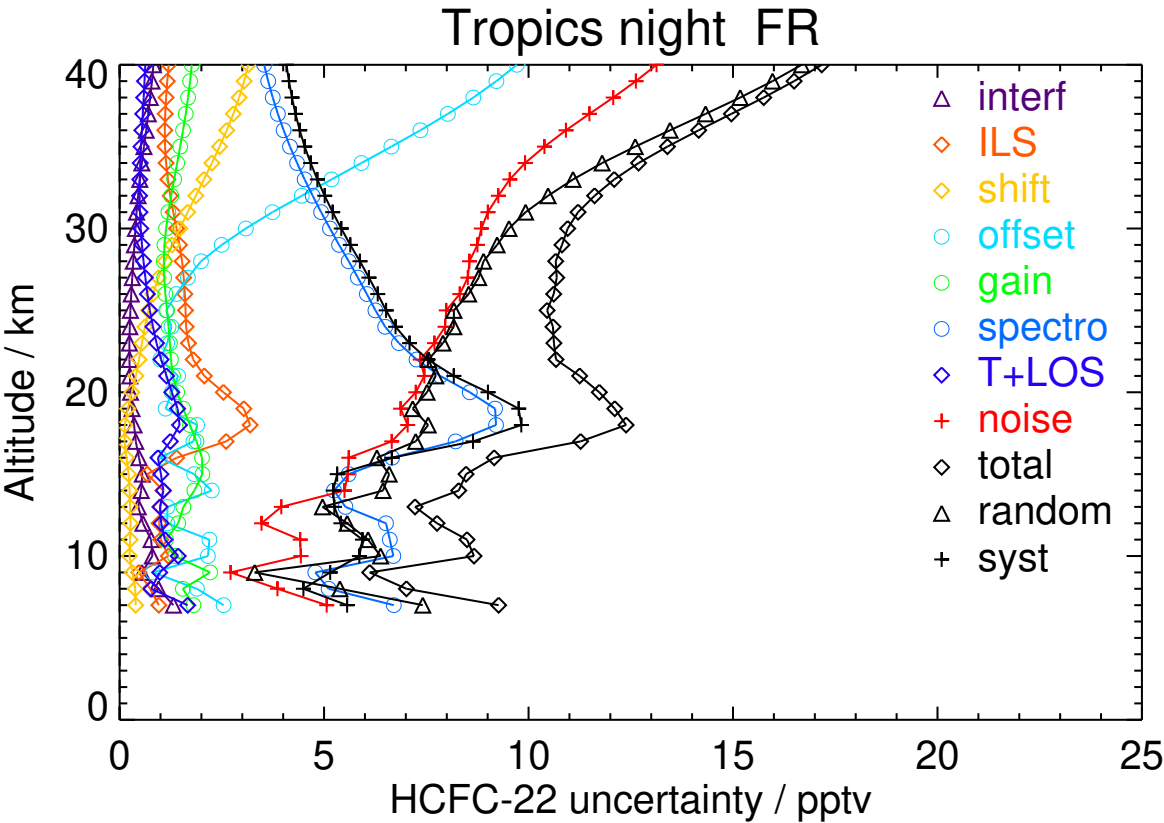

**Figure S18.** V8H\_F-22\_61 Tropics night

**Table S20.** HCFC-22 error budget for Southern midlatitude winter day. All uncertainties are  $1\sigma$ .

| altitude<br>(km) | mean target<br>(pptv) | interf<br>(pptv) | ILS<br>(pptv) | shift<br>(pptv) | offset<br>(pptv) | gain<br>(pptv) | spectro<br>(pptv) | T+LOS<br>(pptv) | noise<br>(pptv) | random<br>(pptv) | syst<br>(pptv) | total<br>(pptv) |
|------------------|-----------------------|------------------|---------------|-----------------|------------------|----------------|-------------------|-----------------|-----------------|------------------|----------------|-----------------|
| 5                | 144.62                | 1.40             | 0.64          | 0.31            | 2.57             | 2.50           | 8.89              | 2.38            | 5.13            | 8.75             | 7.05           | 11.24           |
| 8                | 148.52                | 0.45             | 0.37          | 0.17            | 0.90             | 1.81           | 5.11              | 1.25            | 3.08            | 4.20             | 4.90           | 6.45            |
| 11               | 148.44                | 0.52             | 0.75          | 0.06            | 1.42             | 1.92           | 6.04              | 1.18            | 4.17            | 5.95             | 5.14           | 7.86            |
| 14               | 136.03                | 0.38             | 1.65          | 0.10            | 1.51             | 2.16           | 7.80              | 1.41            | 5.01            | 5.59             | 8.16           | 9.89            |
| 17               | 121.48                | 0.32             | 2.41          | 0.23            | 1.50             | 1.66           | 7.08              | 1.16            | 6.01            | 6.44             | 7.56           | 9.93            |
| 20               | 105.75                | 0.25             | 1.97          | 0.35            | 1.42             | 1.38           | 6.12              | 0.84            | 7.11            | 7.39             | 6.49           | 9.83            |
| 23               | 97.37                 | 0.24             | 1.12          | 0.47            | 1.48             | 1.18           | 5.13              | 0.55            | 8.20            | 8.42             | 5.29           | 9.95            |
| 26               | 91.09                 | 0.28             | 0.86          | 0.63            | 2.49             | 1.06           | 4.64              | 0.42            | 9.12            | 9.52             | 4.76           | 10.65           |
| 29               | 85.25                 | 0.35             | 0.87          | 0.95            | 4.62             | 1.04           | 4.17              | 0.39            | 10.05           | 11.14            | 4.32           | 11.95           |
| 32               | 77.40                 | 0.46             | 0.99          | 1.37            | 7.20             | 1.06           | 3.70              | 0.45            | 11.52           | 13.69            | 3.91           | 14.24           |
| 35               | 69.50                 | 0.60             | 1.13          | 1.76            | 9.51             | 1.12           | 3.29              | 0.54            | 13.33           | 16.51            | 3.57           | 16.89           |
| 38               | 63.65                 | 0.71             | 1.28          | 2.07            | 11.31            | 1.18           | 2.97              | 0.62            | 14.97           | 18.92            | 3.34           | 19.21           |
| 41               | 60.99                 | 0.81             | 1.46          | 2.41            | 12.24            | 1.22           | 2.73              | 0.69            | 15.91           | 20.26            | 3.23           | 20.52           |

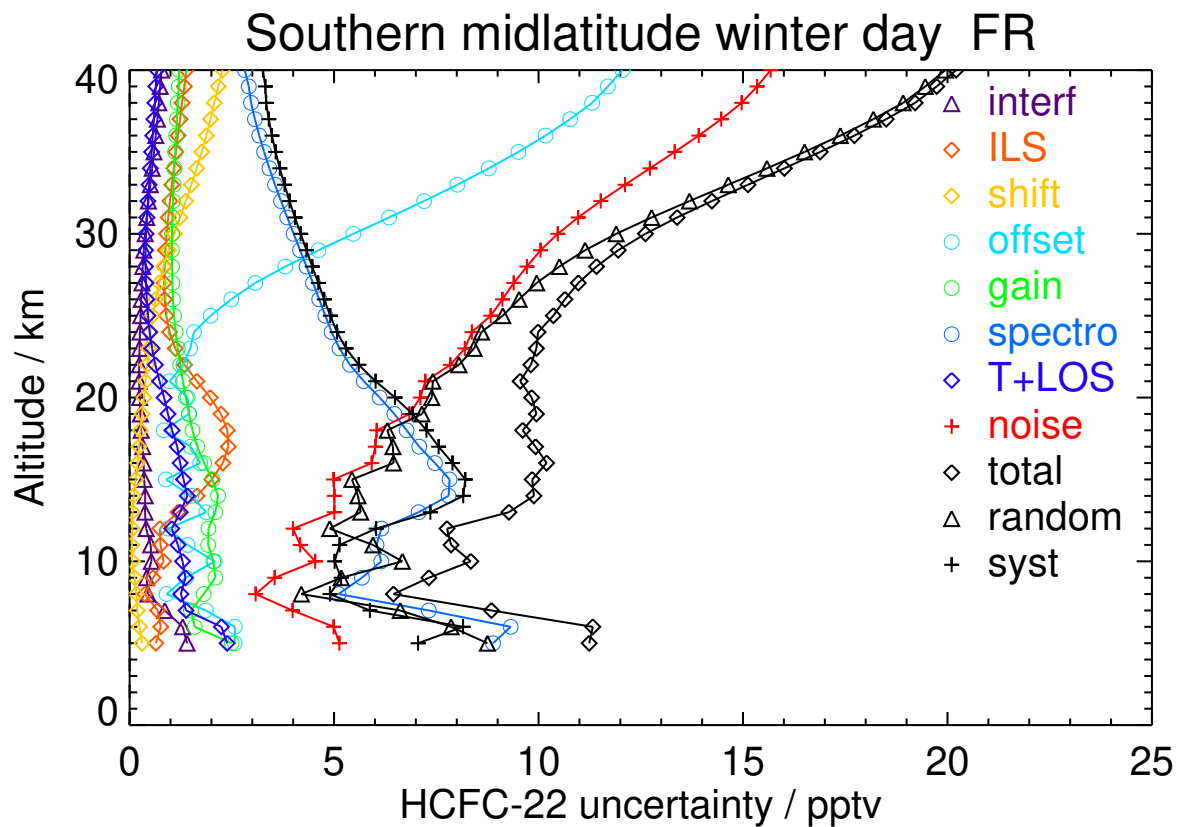

**Figure S19.** V8H\_F-22\_61 Southern midlatitude winter day

**Table S21.** HCFC-22 error budget for Southern midlatitude winter night. All uncertainties are  $1\sigma$ .

| altitude<br>(km) | mean target<br>(pptv) | interf<br>(pptv) | ILS<br>(pptv) | shift<br>(pptv) | offset<br>(pptv) | gain<br>(pptv) | spectro<br>(pptv) | T+LOS<br>(pptv) | noise<br>(pptv) | random<br>(pptv) | syst<br>(pptv) | total<br>(pptv) |
|------------------|-----------------------|------------------|---------------|-----------------|------------------|----------------|-------------------|-----------------|-----------------|------------------|----------------|-----------------|
| 5                | 147.75                | 1.45             | 0.67          | 0.27            | 2.60             | 1.99           | 9.55              | 3.02            | 5.10            | 7.50             | 9.14           | 11.82           |
| 8                | 149.73                | 0.44             | 0.30          | 0.18            | 0.96             | 2.15           | 4.70              | 1.40            | 3.21            | 4.01             | 4.91           | 6.34            |
| 11               | 151.88                | 0.55             | 0.70          | 0.12            | 1.12             | 1.60           | 5.46              | 1.14            | 4.00            | 5.49             | 4.64           | 7.19            |
| 14               | 137.48                | 0.39             | 1.53          | 0.11            | 1.27             | 2.06           | 7.54              | 1.43            | 4.97            | 5.46             | 7.89           | 9.59            |
| 17               | 123.66                | 0.32             | 2.40          | 0.25            | 1.28             | 1.48           | 6.91              | 1.19            | 6.00            | 6.34             | 7.40           | 9.74            |
| 20               | 107.51                | 0.24             | 2.11          | 0.33            | 1.25             | 1.19           | 6.28              | 0.88            | 7.12            | 7.36             | 6.66           | 9.93            |
| 23               | 95.39                 | 0.24             | 1.22          | 0.46            | 1.36             | 1.04           | 5.15              | 0.57            | 8.19            | 8.38             | 5.34           | 9.93            |
| 26               | 88.22                 | 0.29             | 0.92          | 0.69            | 2.30             | 0.97           | 4.49              | 0.41            | 9.06            | 9.41             | 4.63           | 10.48           |
| 29               | 83.66                 | 0.36             | 0.92          | 1.06            | 4.27             | 0.98           | 3.99              | 0.36            | 9.90            | 10.87            | 4.15           | 11.63           |
| 32               | 78.33                 | 0.48             | 1.02          | 1.50            | 6.75             | 1.02           | 3.57              | 0.41            | 11.26           | 13.25            | 3.77           | 13.78           |
| 35               | 73.41                 | 0.61             | 1.15          | 1.89            | 9.05             | 1.07           | 3.23              | 0.48            | 13.03           | 16.02            | 3.48           | 16.40           |
| 38               | 69.21                 | 0.71             | 1.29          | 2.18            | 10.89            | 1.13           | 2.95              | 0.54            | 14.72           | 18.48            | 3.28           | 18.77           |
| 41               | 65.85                 | 0.79             | 1.42          | 2.37            | 12.13            | 1.16           | 2.72              | 0.59            | 15.90           | 20.18            | 3.14           | 20.43           |

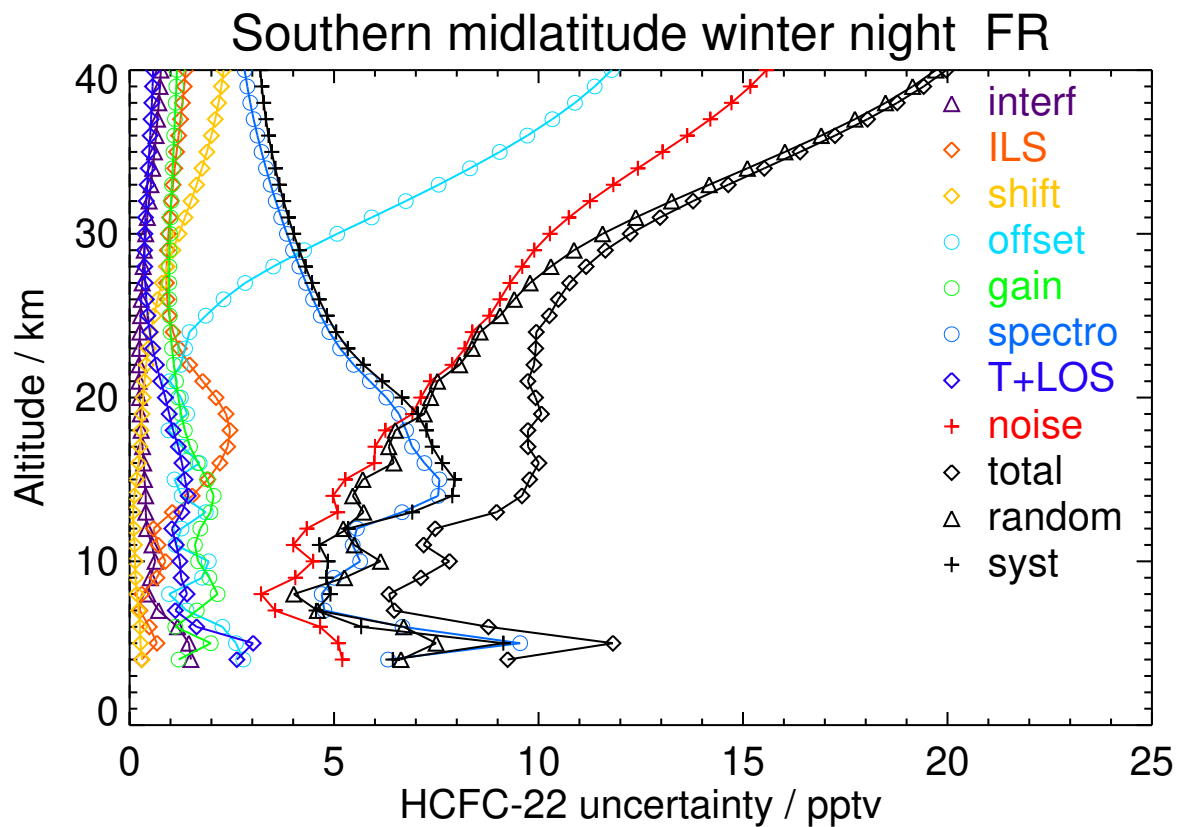

**Figure S20.** V8H\_F-22\_61 Southern midlatitude winter night

**Table S22.** HCFC-22 error budget for Southern midlatitude spring day. All uncertainties are  $1\sigma$ .

| altitude<br>(km) | mean target<br>(pptv) | interf<br>(pptv) | ILS<br>(pptv) | shift<br>(pptv) | offset<br>(pptv) | gain<br>(pptv) | spectro<br>(pptv) | T+LOS<br>(pptv) | noise<br>(pptv) | random<br>(pptv) | syst<br>(pptv) | total<br>(pptv) |
|------------------|-----------------------|------------------|---------------|-----------------|------------------|----------------|-------------------|-----------------|-----------------|------------------|----------------|-----------------|
| 8                | 151.73                | 0.61             | 0.58          | 0.13            | 1.42             | 1.63           | 5.44              | 1.05            | 3.45            | 4.99             | 4.81           | 6.93            |
| 11               | 145.40                | 0.50             | 0.81          | 0.08            | 1.90             | 1.95           | 5.77              | 1.20            | 4.46            | 5.96             | 5.24           | 7.94            |
| 14               | 133.95                | 0.37             | 1.92          | 0.13            | 1.87             | 1.76           | 7.33              | 1.35            | 5.15            | 5.95             | 7.55           | 9.61            |
| 17               | 117.24                | 0.31             | 2.87          | 0.21            | 1.78             | 1.36           | 7.03              | 1.15            | 5.99            | 6.65             | 7.47           | 10.00           |
| 20               | 101.33                | 0.24             | 2.42          | 0.38            | 1.49             | 1.08           | 5.82              | 0.81            | 6.85            | 7.27             | 6.17           | 9.53            |
| 23               | 95.03                 | 0.24             | 1.42          | 0.55            | 1.21             | 1.10           | 4.71              | 0.49            | 7.63            | 7.90             | 4.84           | 9.26            |
| 26               | 88.67                 | 0.28             | 1.19          | 0.84            | 1.38             | 1.15           | 4.34              | 0.39            | 8.31            | 8.60             | 4.42           | 9.67            |
| 29               | 82.13                 | 0.35             | 1.15          | 1.30            | 2.49             | 1.01           | 4.05              | 0.38            | 8.76            | 9.32             | 4.08           | 10.18           |
| 32               | 74.33                 | 0.45             | 1.08          | 1.86            | 4.48             | 0.99           | 3.67              | 0.41            | 9.33            | 10.62            | 3.71           | 11.25           |
| 35               | 68.77                 | 0.59             | 1.06          | 2.41            | 6.76             | 1.08           | 3.28              | 0.49            | 10.58           | 12.86            | 3.39           | 13.30           |
| 38               | 65.09                 | 0.74             | 1.11          | 2.86            | 8.84             | 1.21           | 2.95              | 0.57            | 12.27           | 15.46            | 3.17           | 15.78           |
| 41               | 62.70                 | 0.85             | 1.22          | 3.15            | 10.41            | 1.31           | 2.71              | 0.63            | 13.76           | 17.61            | 3.06           | 17.87           |

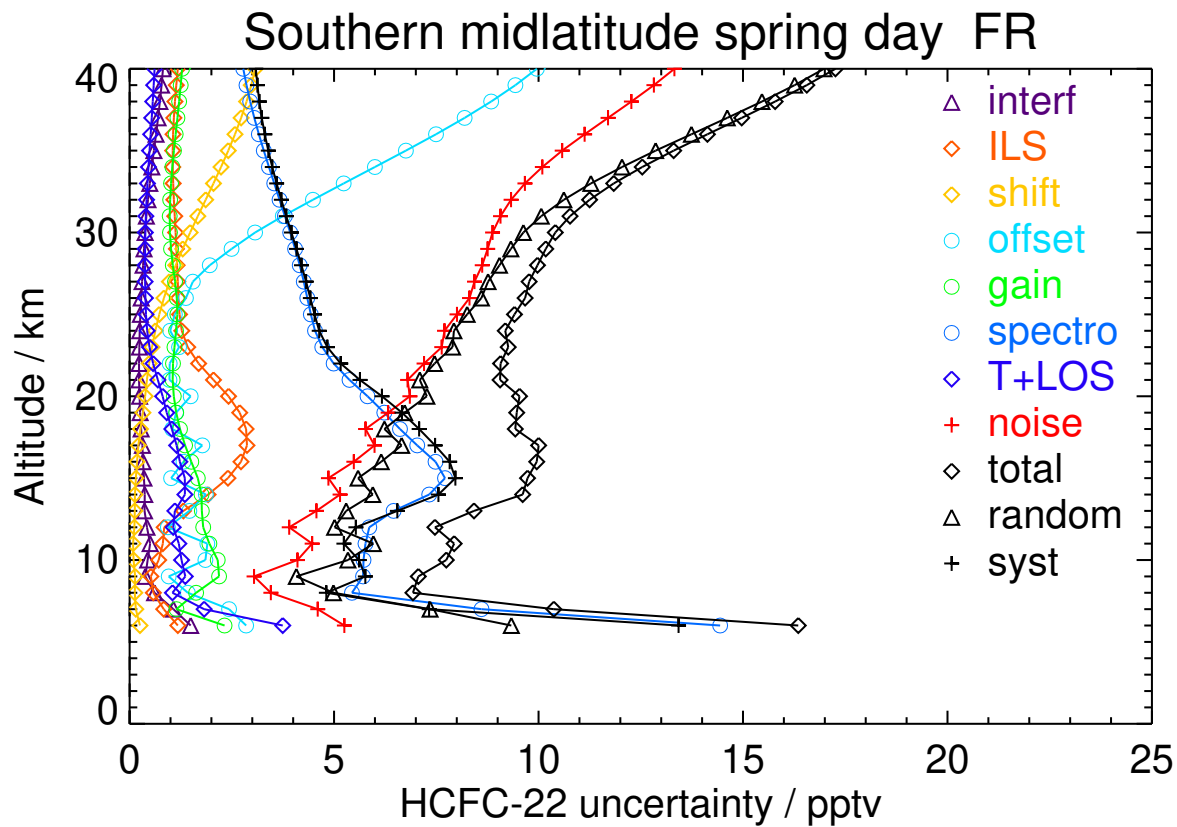

**Figure S21.** V8H\_F-22\_61 Southern midlatitude spring day

**Table S23.** HCFC-22 error budget for Southern midlatitude spring night. All uncertainties are  $1\sigma$ .

| altitude<br>(km) | mean target<br>(pptv) | interf<br>(pptv) | ILS<br>(pptv) | shift<br>(pptv) | offset<br>(pptv) | gain<br>(pptv) | spectro<br>(pptv) | T+LOS<br>(pptv) | noise<br>(pptv) | random<br>(pptv) | syst<br>(pptv) | total<br>(pptv) |
|------------------|-----------------------|------------------|---------------|-----------------|------------------|----------------|-------------------|-----------------|-----------------|------------------|----------------|-----------------|
| 8                | 153.27                | 0.48             | 0.30          | 0.17            | 1.07             | 1.76           | 4.95              | 1.19            | 3.04            | 3.91             | 4.94           | 6.30            |
| 11               | 145.65                | 0.50             | 0.61          | 0.31            | 1.74             | 1.79           | 5.83              | 1.16            | 4.18            | 5.86             | 5.05           | 7.73            |
| 14               | 135.71                | 0.36             | 1.80          | 0.13            | 1.83             | 2.09           | 7.23              | 1.28            | 4.98            | 5.75             | 7.53           | 9.48            |
| 17               | 118.39                | 0.30             | 2.80          | 0.21            | 1.76             | 1.58           | 6.45              | 1.08            | 5.80            | 6.27             | 7.12           | 9.48            |
| 20               | 107.90                | 0.24             | 2.23          | 0.42            | 1.57             | 1.26           | 5.40              | 0.70            | 6.61            | 6.94             | 5.86           | 9.09            |
| 23               | 103.44                | 0.23             | 1.21          | 0.57            | 1.20             | 1.12           | 4.57              | 0.42            | 7.36            | 7.54             | 4.78           | 8.93            |
| 26               | 102.61                | 0.27             | 1.05          | 0.82            | 1.29             | 1.08           | 4.43              | 0.33            | 8.10            | 8.28             | 4.62           | 9.49            |
| 29               | 99.86                 | 0.34             | 1.10          | 1.16            | 2.49             | 1.10           | 4.33              | 0.32            | 8.68            | 9.14             | 4.57           | 10.22           |
| 32               | 89.24                 | 0.41             | 1.09          | 1.56            | 4.59             | 1.16           | 4.00              | 0.36            | 9.42            | 10.62            | 4.28           | 11.45           |
| 35               | 79.94                 | 0.54             | 1.11          | 2.00            | 6.95             | 1.24           | 3.60              | 0.43            | 10.77           | 13.00            | 3.93           | 13.58           |
| 38               | 72.70                 | 0.69             | 1.20          | 2.40            | 9.08             | 1.34           | 3.23              | 0.52            | 12.48           | 15.66            | 3.65           | 16.08           |
| 41               | 67.58                 | 0.80             | 1.34          | 2.68            | 10.68            | 1.42           | 2.96              | 0.59            | 13.97           | 17.83            | 3.49           | 18.17           |

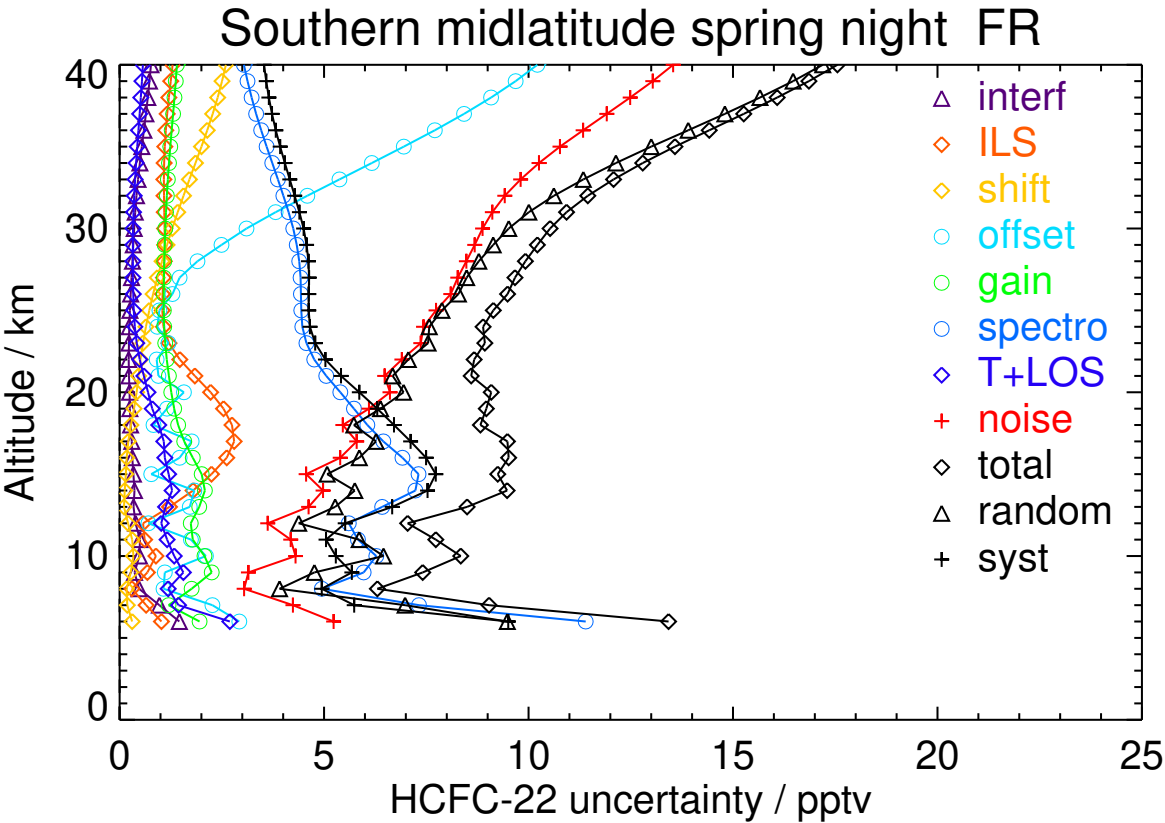

**Figure S22.** V8H\_F-22\_61 Southern midlatitude spring night



**Table S24.** HCFC-22 error budget for Southern midlatitude summer day. All uncertainties are  $1\sigma$ .

| altitude<br>(km) | mean target<br>(pptv) | interf<br>(pptv) | ILS<br>(pptv) | shift<br>(pptv) | offset<br>(pptv) | gain<br>(pptv) | spectro<br>(pptv) | T+LOS<br>(pptv) | noise<br>(pptv) | random<br>(pptv) | syst<br>(pptv) | total<br>(pptv) |
|------------------|-----------------------|------------------|---------------|-----------------|------------------|----------------|-------------------|-----------------|-----------------|------------------|----------------|-----------------|
| 5                | 142.33                | 1.73             | 0.74          | 0.43            | 2.59             | 1.42           | 8.00              | 2.66            | 5.24            | 7.31             | 7.58           | 10.53           |
| 8                | 149.17                | 0.49             | 0.43          | 0.20            | 0.84             | 1.90           | 4.73              | 1.27            | 2.94            | 3.67             | 4.89           | 6.12            |
| 11               | 145.90                | 0.64             | 1.10          | 0.08            | 1.19             | 0.70           | 6.92              | 1.32            | 3.88            | 5.16             | 6.45           | 8.26            |
| 14               | 135.07                | 0.41             | 1.45          | 0.10            | 1.27             | 2.12           | 7.48              | 1.24            | 4.75            | 5.28             | 7.78           | 9.41            |
| 17               | 121.62                | 0.31             | 2.87          | 0.20            | 1.31             | 1.33           | 6.66              | 1.12            | 5.69            | 6.02             | 7.32           | 9.47            |
| 20               | 104.09                | 0.24             | 2.59          | 0.29            | 1.20             | 0.99           | 5.95              | 0.82            | 6.66            | 6.91             | 6.48           | 9.47            |
| 23               | 94.06                 | 0.23             | 1.37          | 0.47            | 1.02             | 0.93           | 4.76              | 0.48            | 7.50            | 7.64             | 4.98           | 9.12            |
| 26               | 88.08                 | 0.28             | 1.18          | 0.81            | 1.15             | 0.97           | 4.17              | 0.37            | 8.20            | 8.36             | 4.40           | 9.44            |
| 29               | 80.92                 | 0.34             | 1.13          | 1.35            | 2.08             | 0.92           | 3.69              | 0.36            | 8.69            | 9.06             | 3.94           | 9.88            |
| 32               | 74.41                 | 0.46             | 1.01          | 2.04            | 3.77             | 0.98           | 3.21              | 0.41            | 9.17            | 10.15            | 3.48           | 10.73           |
| 35               | 68.79                 | 0.62             | 0.89          | 2.74            | 5.74             | 1.14           | 2.80              | 0.49            | 10.17           | 12.03            | 3.11           | 12.43           |
| 38               | 64.31                 | 0.78             | 0.87          | 3.33            | 7.64             | 1.30           | 2.49              | 0.58            | 11.75           | 14.45            | 2.89           | 14.73           |
| 41               | 60.91                 | 0.91             | 0.95          | 3.74            | 9.13             | 1.42           | 2.26              | 0.66            | 13.25           | 16.57            | 2.77           | 16.80           |

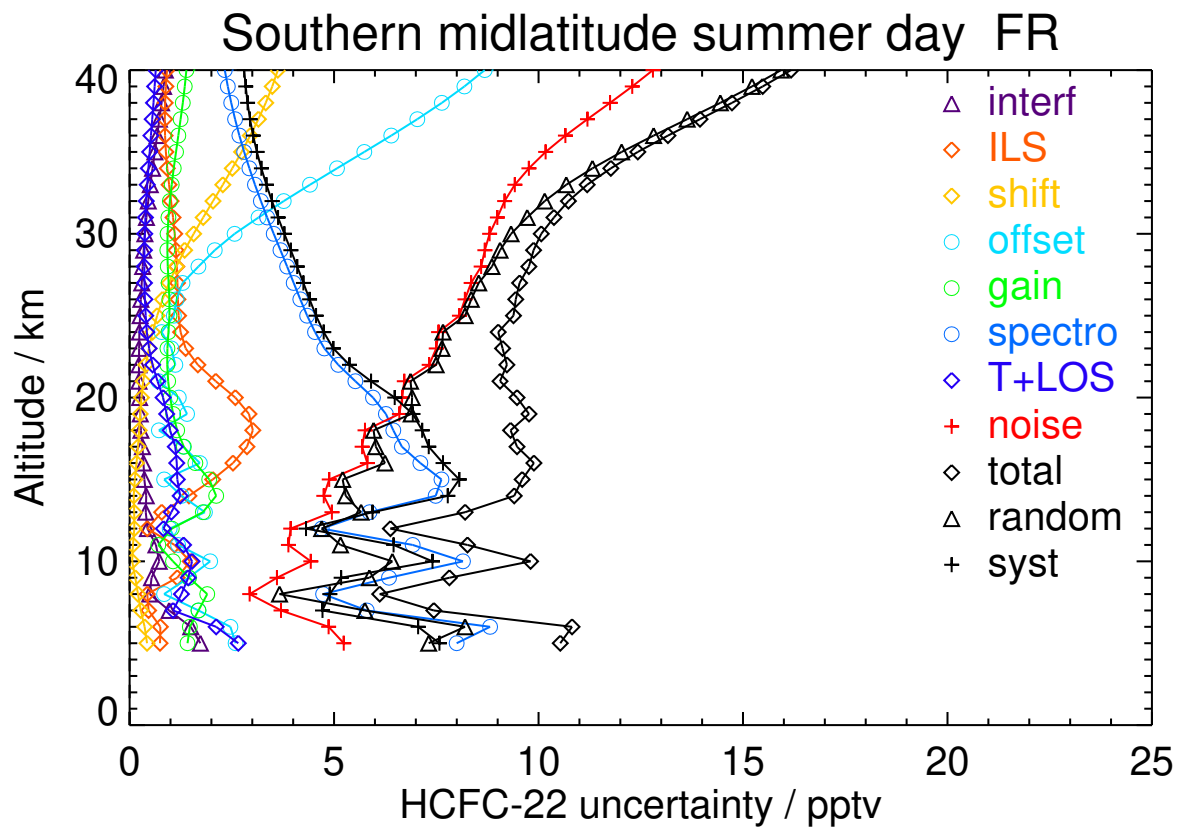

**Figure S23.** V8H\_F-22\_61 Southern midlatitude summer day

Table S25. HCFC-22 error budget for Southern midlatitude summer night. All uncertainties are  $1\sigma$ .

| altitude<br>(km) | mean target<br>(pptv) | interf<br>(pptv) | ILS<br>(pptv) | shift<br>(pptv) | offset<br>(pptv) | gain<br>(pptv) | spectro<br>(pptv) | T+LOS<br>(pptv) | noise<br>(pptv) | random<br>(pptv) | syst<br>(pptv) | total<br>(pptv) |
|------------------|-----------------------|------------------|---------------|-----------------|------------------|----------------|-------------------|-----------------|-----------------|------------------|----------------|-----------------|
| 5                | 146.23                | 1.68             | 0.65          | 0.40            | 2.74             | 1.78           | 7.05              | 2.26            | 5.32            | 8.32             | 5.28           | 9.85            |
| 8                | 145.18                | 0.93             | 1.30          | 0.15            | 2.03             | 1.32           | 7.25              | 1.67            | 4.51            | 7.13             | 5.76           | 9.17            |
| 11               | 147.55                | 0.49             | 1.32          | 0.07            | 1.07             | 1.38           | 5.87              | 1.12            | 3.54            | 5.46             | 4.84           | 7.30            |
| 14               | 140.85                | 0.43             | 1.49          | 0.12            | 1.00             | 1.88           | 6.73              | 1.01            | 4.52            | 5.85             | 6.29           | 8.59            |
| 17               | 123.83                | 0.32             | 3.56          | 0.23            | 1.08             | 1.59           | 8.21              | 1.27            | 5.60            | 6.07             | 8.94           | 10.81           |
| 20               | 103.06                | 0.25             | 2.56          | 0.29            | 1.10             | 1.14           | 6.29              | 0.86            | 6.58            | 6.85             | 6.78           | 9.64            |
| 23               | 92.69                 | 0.23             | 1.23          | 0.48            | 0.97             | 0.98           | 4.66              | 0.48            | 7.47            | 7.60             | 4.87           | 9.03            |
| 26               | 89.26                 | 0.27             | 1.09          | 0.79            | 1.14             | 0.89           | 4.08              | 0.37            | 8.20            | 8.35             | 4.27           | 9.38            |
| 29               | 81.79                 | 0.34             | 1.11          | 1.32            | 2.06             | 0.87           | 3.61              | 0.37            | 8.70            | 9.07             | 3.85           | 9.85            |
| 32               | 74.22                 | 0.45             | 1.02          | 2.05            | 3.70             | 0.97           | 3.09              | 0.40            | 9.13            | 10.09            | 3.36           | 10.64           |
| 35               | 69.56                 | 0.62             | 0.93          | 2.80            | 5.65             | 1.15           | 2.67              | 0.47            | 10.07           | 11.92            | 3.01           | 12.29           |
| 38               | 66.26                 | 0.79             | 0.96          | 3.43            | 7.54             | 1.35           | 2.38              | 0.55            | 11.59           | 14.29            | 2.85           | 14.57           |
| 41               | 63.69                 | 0.92             | 1.09          | 3.88            | 9.03             | 1.50           | 2.20              | 0.61            | 13.09           | 16.41            | 2.80           | 16.65           |

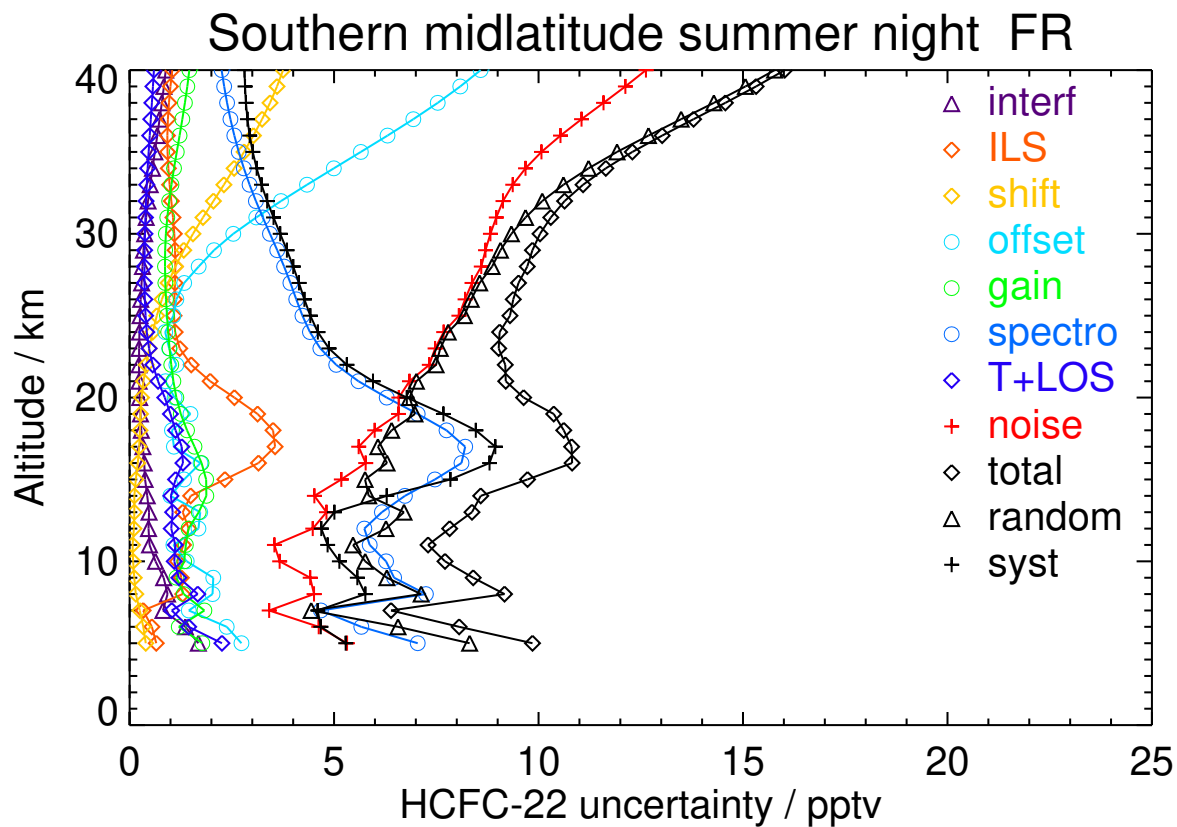

Figure S24. V8H\_F-22\_61 Southern midlatitude summer night

**Table S26.** HCFC-22 error budget for Southern midlatitude autumn day. All uncertainties are  $1\sigma$ .

| altitude<br>(km) | mean target<br>(pptv) | interf<br>(pptv) | ILS<br>(pptv) | shift<br>(pptv) | offset<br>(pptv) | gain<br>(pptv) | spectro<br>(pptv) | T+LOS<br>(pptv) | noise<br>(pptv) | random<br>(pptv) | syst<br>(pptv) | total<br>(pptv) |
|------------------|-----------------------|------------------|---------------|-----------------|------------------|----------------|-------------------|-----------------|-----------------|------------------|----------------|-----------------|
| 5                | 152.70                | 1.35             | 0.17          | 0.30            | 2.47             | 1.50           | 8.86              | 2.57            | 4.36            | 5.81             | 8.98           | 10.69           |
| 8                | 143.39                | 0.99             | 0.90          | 0.14            | 2.35             | 1.00           | 6.93              | 1.21            | 4.29            | 6.48             | 5.84           | 8.73            |
| 11               | 150.09                | 0.47             | 1.29          | 0.10            | 1.98             | 1.62           | 6.22              | 1.17            | 4.14            | 6.59             | 4.72           | 8.10            |
| 14               | 140.09                | 0.36             | 1.57          | 0.10            | 1.63             | 1.79           | 6.73              | 1.08            | 4.69            | 5.31             | 6.98           | 8.77            |
| 17               | 123.97                | 0.30             | 2.89          | 0.32            | 1.31             | 1.71           | 7.92              | 1.10            | 5.58            | 5.99             | 8.51           | 10.40           |
| 20               | 104.60                | 0.24             | 1.79          | 0.35            | 1.09             | 1.54           | 6.20              | 0.73            | 6.51            | 6.76             | 6.53           | 9.39            |
| 23               | 91.80                 | 0.23             | 1.09          | 0.55            | 1.00             | 1.33           | 4.84              | 0.46            | 7.48            | 7.63             | 5.06           | 9.16            |
| 26               | 84.77                 | 0.27             | 1.03          | 0.75            | 1.63             | 1.07           | 4.16              | 0.35            | 8.31            | 8.54             | 4.37           | 9.59            |
| 29               | 80.70                 | 0.33             | 0.97          | 1.02            | 3.31             | 0.98           | 3.75              | 0.31            | 9.01            | 9.69             | 3.94           | 10.46           |
| 32               | 74.41                 | 0.42             | 0.87          | 1.39            | 5.74             | 1.02           | 3.32              | 0.33            | 10.06           | 11.69            | 3.52           | 12.21           |
| 35               | 68.43                 | 0.54             | 0.82          | 1.74            | 8.17             | 1.13           | 2.94              | 0.38            | 11.74           | 14.44            | 3.18           | 14.79           |
| 38               | 63.95                 | 0.65             | 0.85          | 2.01            | 10.20            | 1.25           | 2.64              | 0.44            | 13.54           | 17.10            | 2.95           | 17.35           |
| 41               | 61.38                 | 0.72             | 0.91          | 2.17            | 11.58            | 1.33           | 2.44              | 0.48            | 14.86           | 19.00            | 2.83           | 19.21           |

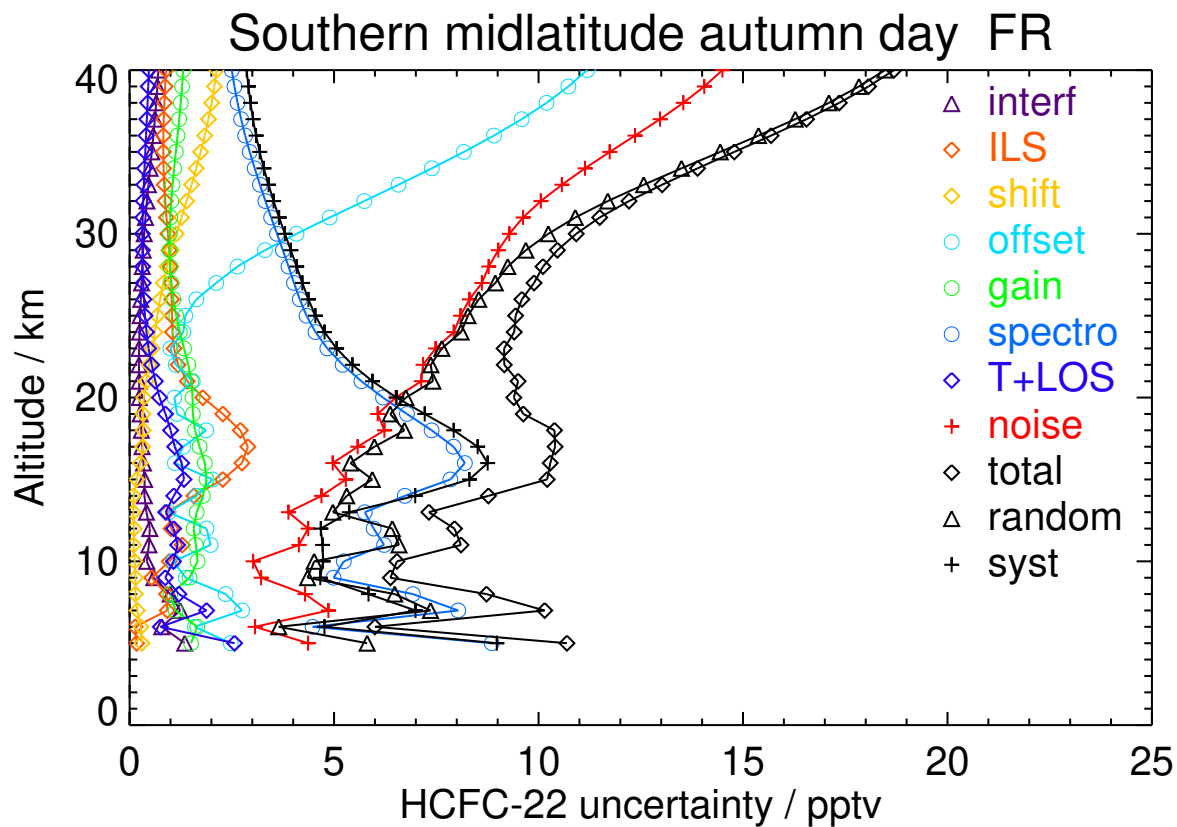

**Figure S25.** V8H\_F-22\_61 Southern midlatitude autumn day

**Table S27.** HCFC-22 error budget for Southern midlatitude autumn night. All uncertainties are  $1\sigma$ .

| altitude<br>(km) | mean target<br>(pptv) | interf<br>(pptv) | ILS<br>(pptv) | shift<br>(pptv) | offset<br>(pptv) | gain<br>(pptv) | spectro<br>(pptv) | T+LOS<br>(pptv) | noise<br>(pptv) | random<br>(pptv) | syst<br>(pptv) | total<br>(pptv) |
|------------------|-----------------------|------------------|---------------|-----------------|------------------|----------------|-------------------|-----------------|-----------------|------------------|----------------|-----------------|
| 8                | 144.67                | 0.80             | 0.57          | 0.18            | 1.91             | 1.16           | 5.03              | 0.74            | 3.69            | 5.05             | 4.46           | 6.74            |
| 11               | 151.59                | 0.62             | 1.76          | 0.12            | 2.29             | 1.32           | 6.90              | 1.31            | 4.51            | 6.84             | 5.78           | 8.95            |
| 14               | 144.88                | 0.37             | 1.72          | 0.12            | 2.03             | 1.78           | 6.89              | 1.16            | 5.06            | 5.77             | 7.17           | 9.21            |
| 17               | 123.81                | 0.31             | 3.02          | 0.32            | 1.63             | 1.66           | 8.64              | 1.17            | 5.84            | 6.34             | 9.20           | 11.17           |
| 20               | 105.28                | 0.24             | 1.70          | 0.31            | 1.21             | 1.46           | 6.11              | 0.74            | 6.63            | 6.88             | 6.41           | 9.41            |
| 23               | 95.81                 | 0.23             | 1.09          | 0.52            | 1.02             | 1.36           | 4.87              | 0.46            | 7.54            | 7.70             | 5.09           | 9.23            |
| 26               | 89.54                 | 0.27             | 1.04          | 0.73            | 1.59             | 1.06           | 4.39              | 0.37            | 8.35            | 8.57             | 4.59           | 9.72            |
| 29               | 81.96                 | 0.33             | 0.99          | 1.06            | 3.15             | 0.94           | 3.94              | 0.34            | 8.96            | 9.58             | 4.14           | 10.44           |
| 32               | 73.11                 | 0.43             | 0.90          | 1.48            | 5.49             | 0.98           | 3.45              | 0.36            | 9.91            | 11.45            | 3.66           | 12.03           |
| 35               | 66.20                 | 0.56             | 0.86          | 1.88            | 7.89             | 1.09           | 3.04              | 0.41            | 11.50           | 14.10            | 3.28           | 14.48           |
| 38               | 61.75                 | 0.68             | 0.90          | 2.20            | 9.92             | 1.22           | 2.73              | 0.48            | 13.27           | 16.75            | 3.04           | 17.02           |
| 41               | 58.96                 | 0.76             | 0.99          | 2.40            | 11.33            | 1.30           | 2.52              | 0.53            | 14.63           | 18.70            | 2.90           | 18.93           |

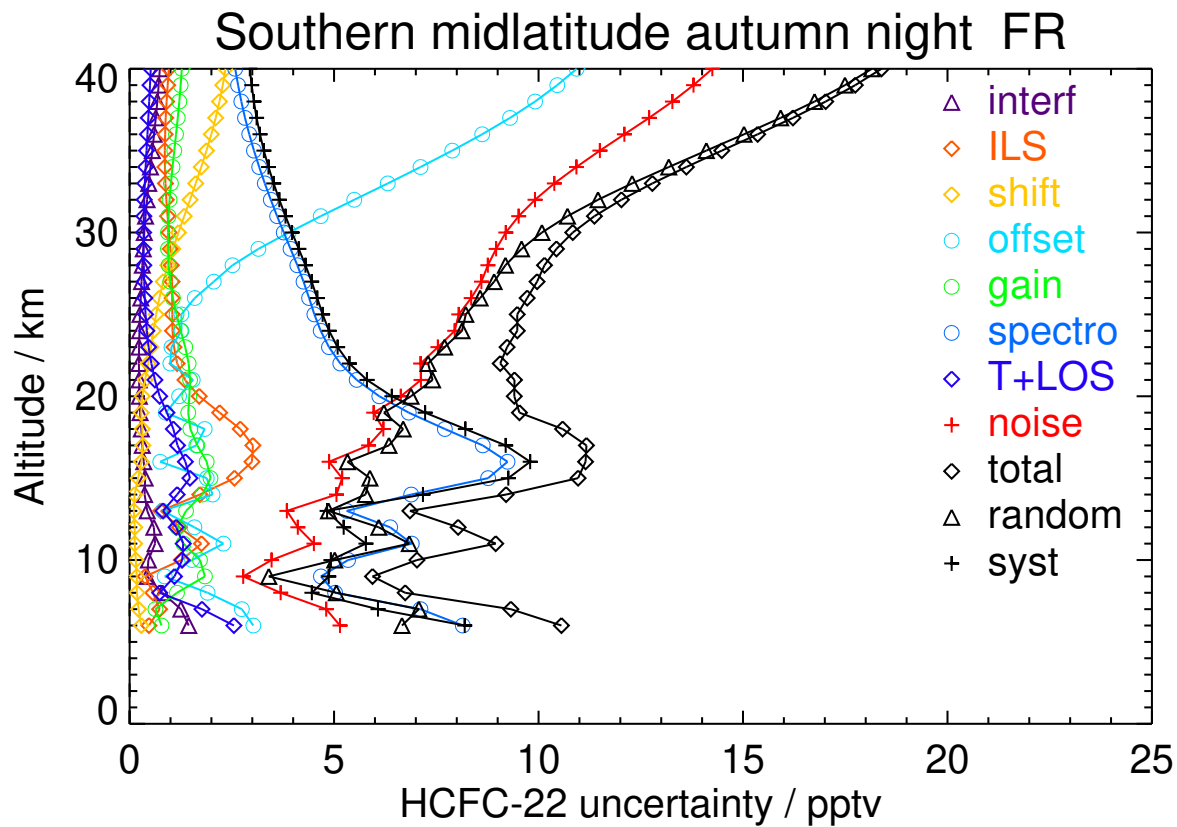

**Figure S26.** V8H\_F-22\_61 Southern midlatitude autumn night

**Table S28.** HCFC-22 error budget for Southern polar winter day. All uncertainties are  $1\sigma$ .

| altitude<br>(km) | mean target<br>(pptv) | interf<br>(pptv) | ILS<br>(pptv) | shift<br>(pptv) | offset<br>(pptv) | gain<br>(pptv) | spectro<br>(pptv) | T+LOS<br>(pptv) | noise<br>(pptv) | random<br>(pptv) | syst<br>(pptv) | total<br>(pptv) |
|------------------|-----------------------|------------------|---------------|-----------------|------------------|----------------|-------------------|-----------------|-----------------|------------------|----------------|-----------------|
| 5                | 143.10                | 1.44             | 1.45          | 0.34            | 2.97             | 1.38           | 15.99             | 4.22            | 5.60            | 7.76             | 16.11          | 17.88           |
| 8                | 151.49                | 0.64             | 0.96          | 0.10            | 2.61             | 2.16           | 7.12              | 1.68            | 5.30            | 6.88             | 6.86           | 9.72            |
| 11               | 141.32                | 0.49             | 1.54          | 0.10            | 1.21             | 1.60           | 7.89              | 1.92            | 4.35            | 5.25             | 8.00           | 9.57            |
| 14               | 120.58                | 0.46             | 2.17          | 0.13            | 1.42             | 1.42           | 9.24              | 2.22            | 5.76            | 6.47             | 9.52           | 11.51           |
| 17               | 95.62                 | 0.36             | 2.04          | 0.16            | 1.58             | 1.06           | 7.66              | 1.63            | 7.33            | 7.74             | 7.94           | 11.09           |
| 20               | 78.81                 | 0.27             | 1.56          | 0.19            | 1.62             | 0.80           | 6.09              | 1.14            | 8.71            | 8.97             | 6.29           | 10.95           |
| 23               | 62.77                 | 0.28             | 1.00          | 0.34            | 2.54             | 0.62           | 4.51              | 0.78            | 9.85            | 10.23            | 4.61           | 11.22           |
| 26               | 48.65                 | 0.31             | 0.74          | 0.69            | 4.30             | 0.54           | 3.17              | 0.53            | 10.63           | 11.52            | 3.23           | 11.97           |
| 29               | 39.48                 | 0.41             | 0.73          | 1.23            | 6.69             | 0.55           | 2.19              | 0.48            | 11.57           | 13.45            | 2.27           | 13.64           |
| 32               | 34.17                 | 0.57             | 0.89          | 1.81            | 9.23             | 0.61           | 1.62              | 0.58            | 13.18           | 16.23            | 1.80           | 16.33           |
| 35               | 30.57                 | 0.73             | 1.10          | 2.29            | 11.36            | 0.69           | 1.32              | 0.71            | 14.96           | 18.96            | 1.68           | 19.04           |
| 38               | 27.98                 | 0.85             | 1.30          | 2.64            | 12.98            | 0.76           | 1.18              | 0.81            | 16.43           | 21.15            | 1.73           | 21.22           |
| 41               | 26.86                 | 0.93             | 1.45          | 2.87            | 13.99            | 0.82           | 1.11              | 0.87            | 17.35           | 22.52            | 1.84           | 22.60           |

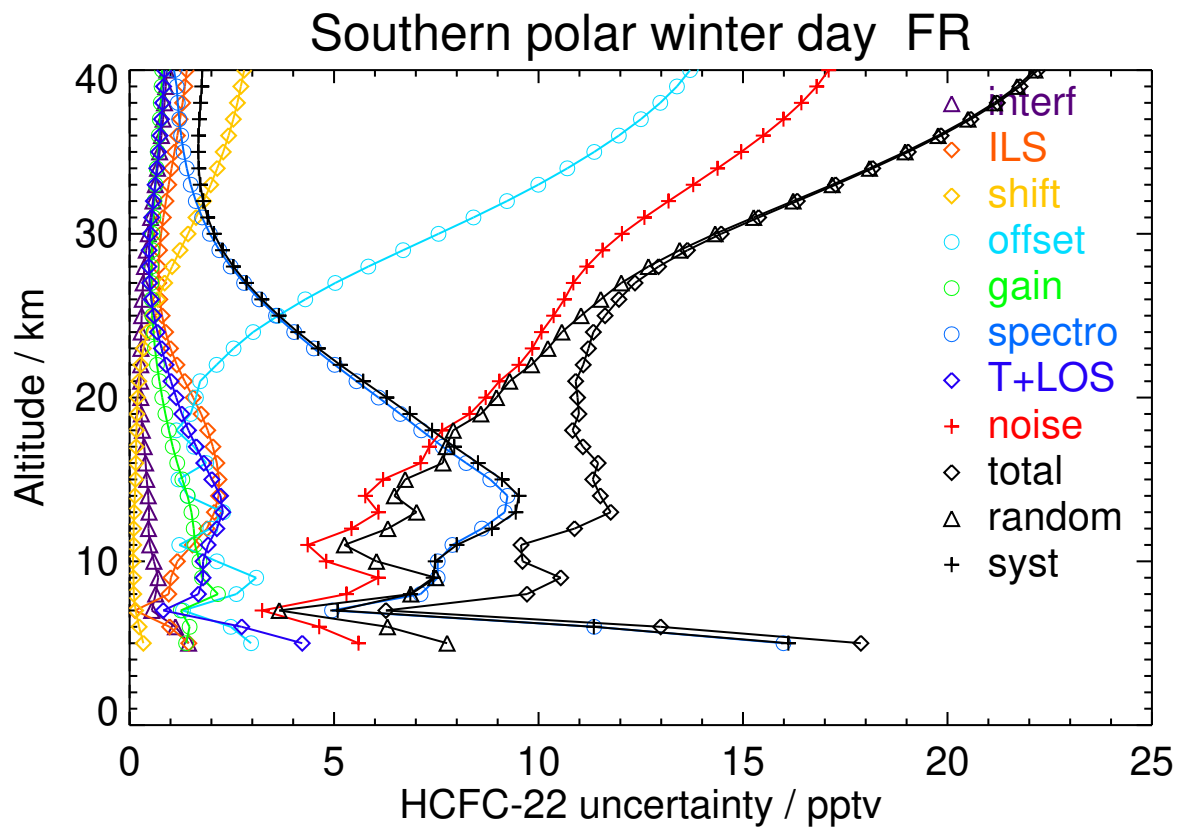

**Figure S27.** V8H\_F-22\_61 Southern polar winter day

Table S29. HCFC-22 error budget for Southern polar winter night. All uncertainties are  $1\sigma$ .

| altitude<br>(km) | mean target<br>(pptv) | interf<br>(pptv) | ILS<br>(pptv) | shift<br>(pptv) | offset<br>(pptv) | gain<br>(pptv) | spectro<br>(pptv) | T+LOS<br>(pptv) | noise<br>(pptv) | random<br>(pptv) | syst<br>(pptv) | total<br>(pptv) |
|------------------|-----------------------|------------------|---------------|-----------------|------------------|----------------|-------------------|-----------------|-----------------|------------------|----------------|-----------------|
| 5                | 149.12                | 1.42             | 0.67          | 0.20            | 2.79             | 1.04           | 8.37              | 2.36            | 5.03            | 7.26             | 7.72           | 10.60           |
| 8                | 149.06                | 0.54             | 0.25          | 0.08            | 1.88             | 1.91           | 4.89              | 1.31            | 4.19            | 5.03             | 5.04           | 7.12            |
| 11               | 146.60                | 0.44             | 0.71          | 0.05            | 1.23             | 1.77           | 5.94              | 1.26            | 4.25            | 4.95             | 5.98           | 7.76            |
| 14               | 123.78                | 0.42             | 1.69          | 0.14            | 1.23             | 1.73           | 8.10              | 1.80            | 5.53            | 6.02             | 8.41           | 10.34           |
| 17               | 99.85                 | 0.34             | 1.90          | 0.18            | 1.36             | 1.21           | 6.76              | 1.34            | 6.96            | 7.28             | 7.07           | 10.15           |
| 20               | 83.25                 | 0.27             | 1.65          | 0.22            | 1.64             | 0.94           | 5.82              | 0.98            | 8.45            | 8.72             | 6.06           | 10.61           |
| 23               | 66.39                 | 0.28             | 1.18          | 0.32            | 2.66             | 0.79           | 4.62              | 0.73            | 9.77            | 10.18            | 4.79           | 11.25           |
| 26               | 51.82                 | 0.31             | 0.93          | 0.60            | 4.72             | 0.69           | 3.40              | 0.54            | 10.79           | 11.83            | 3.55           | 12.35           |
| 29               | 42.36                 | 0.41             | 0.93          | 1.06            | 7.43             | 0.68           | 2.40              | 0.47            | 12.08           | 14.25            | 2.58           | 14.48           |
| 32               | 36.45                 | 0.56             | 1.09          | 1.55            | 10.11            | 0.71           | 1.75              | 0.53            | 13.89           | 17.28            | 2.05           | 17.40           |
| 35               | 32.53                 | 0.71             | 1.29          | 1.96            | 12.29            | 0.77           | 1.41              | 0.63            | 15.66           | 20.04            | 1.90           | 20.13           |
| 38               | 29.65                 | 0.82             | 1.48          | 2.27            | 13.89            | 0.82           | 1.26              | 0.72            | 17.04           | 22.15            | 1.94           | 22.23           |
| 41               | 24.89                 | 0.91             | 1.64          | 2.67            | 14.58            | 0.85           | 1.13              | 0.79            | 17.67           | 23.11            | 2.02           | 23.20           |

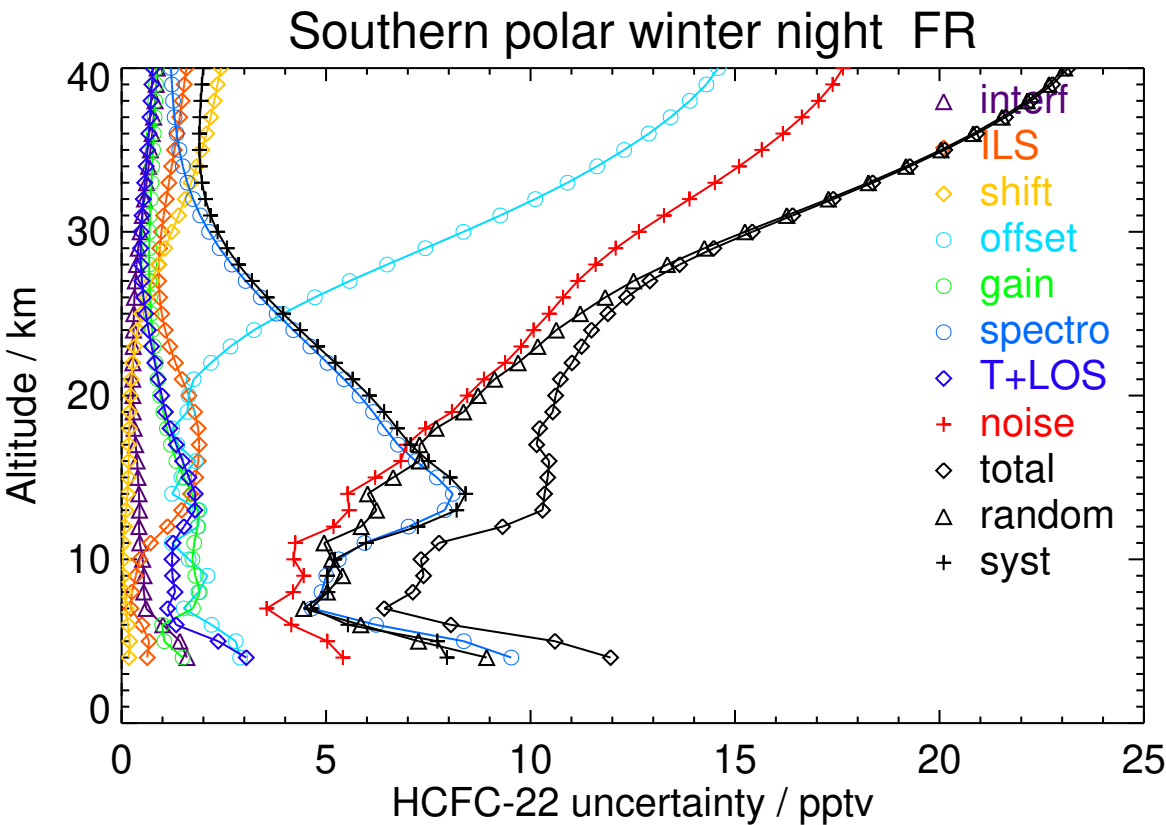

Figure S28. V8H\_F-22\_61 Southern polar winter night

**Table S30.** HCFC-22 error budget for Southern polar spring day. All uncertainties are  $1\sigma$ .

| altitude<br>(km) | mean target<br>(pptv) | interf<br>(pptv) | ILS<br>(pptv) | shift<br>(pptv) | offset<br>(pptv) | gain<br>(pptv) | spectro<br>(pptv) | T+LOS<br>(pptv) | noise<br>(pptv) | random<br>(pptv) | syst<br>(pptv) | total<br>(pptv) |
|------------------|-----------------------|------------------|---------------|-----------------|------------------|----------------|-------------------|-----------------|-----------------|------------------|----------------|-----------------|
| 8                | 151.46                | 0.62             | 0.54          | 0.09            | 1.41             | 1.55           | 5.02              | 1.14            | 3.50            | 4.40             | 4.95           | 6.62            |
| 11               | 145.50                | 0.49             | 2.24          | 0.26            | 2.07             | 1.49           | 7.44              | 1.87            | 5.34            | 6.23             | 7.77           | 9.96            |
| 14               | 118.14                | 0.44             | 4.98          | 0.36            | 1.96             | 0.90           | 9.19              | 2.26            | 6.41            | 7.20             | 10.42          | 12.66           |
| 17               | 85.96                 | 0.34             | 4.57          | 0.29            | 1.59             | 0.53           | 7.12              | 1.58            | 7.31            | 7.71             | 8.43           | 11.42           |
| 20               | 58.99                 | 0.25             | 2.84          | 0.34            | 1.30             | 0.24           | 4.73              | 0.96            | 7.73            | 7.95             | 5.47           | 9.65            |
| 23               | 43.59                 | 0.27             | 1.35          | 0.75            | 1.08             | 0.18           | 2.77              | 0.53            | 8.04            | 8.21             | 2.99           | 8.74            |
| 26               | 42.08                 | 0.36             | 0.91          | 1.44            | 1.20             | 0.24           | 1.84              | 0.43            | 8.47            | 8.72             | 1.95           | 8.93            |
| 29               | 47.91                 | 0.47             | 0.99          | 2.39            | 2.10             | 0.42           | 1.70              | 0.48            | 8.76            | 9.38             | 1.86           | 9.56            |
| 32               | 52.27                 | 0.61             | 0.98          | 3.36            | 3.81             | 0.67           | 1.71              | 0.53            | 9.13            | 10.51            | 1.93           | 10.68           |
| 35               | 52.14                 | 0.76             | 0.88          | 4.13            | 5.93             | 0.94           | 1.69              | 0.57            | 10.11           | 12.49            | 1.98           | 12.64           |
| 38               | 49.70                 | 0.90             | 0.91          | 4.69            | 8.00             | 1.19           | 1.63              | 0.62            | 11.68           | 14.97            | 2.08           | 15.12           |
| 41               | 46.99                 | 1.00             | 1.05          | 5.04            | 9.65             | 1.37           | 1.57              | 0.67            | 13.19           | 17.17            | 2.20           | 17.31           |

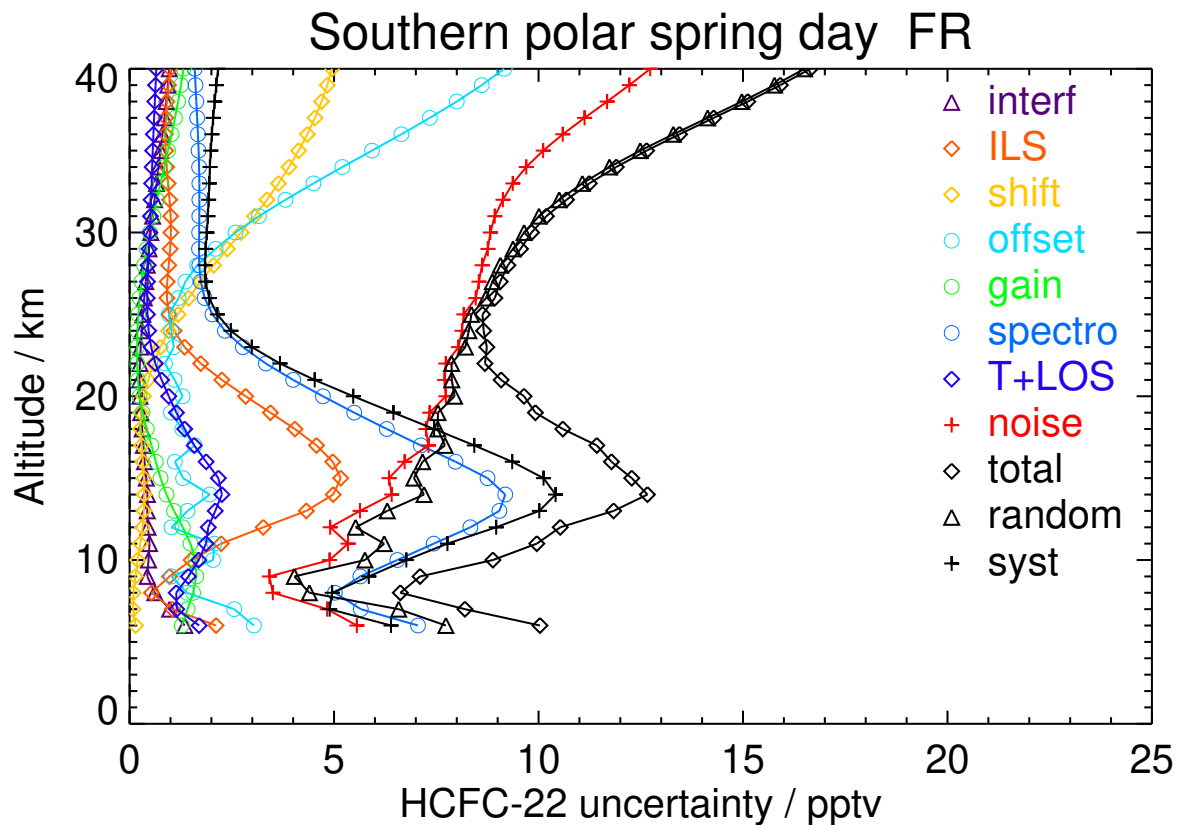

**Figure S29.** V8H\_F-22\_61 Southern polar spring day

**Table S31.** HCFC-22 error budget for Southern polar spring night. All uncertainties are  $1\sigma$ .

| altitude<br>(km) | mean target<br>(pptv) | interf<br>(pptv) | ILS<br>(pptv) | shift<br>(pptv) | offset<br>(pptv) | gain<br>(pptv) | spectro<br>(pptv) | T+LOS<br>(pptv) | noise<br>(pptv) | random<br>(pptv) | syst<br>(pptv) | total<br>(pptv) |
|------------------|-----------------------|------------------|---------------|-----------------|------------------|----------------|-------------------|-----------------|-----------------|------------------|----------------|-----------------|
| 8                | 152.02                | 0.52             | 0.53          | 0.08            | 1.10             | 1.67           | 4.66              | 1.12            | 3.15            | 3.87             | 4.75           | 6.12            |
| 11               | 146.76                | 0.48             | 1.29          | 0.16            | 1.85             | 1.93           | 6.60              | 1.48            | 4.81            | 5.65             | 6.79           | 8.83            |
| 14               | 121.12                | 0.40             | 3.83          | 0.22            | 1.95             | 1.47           | 8.44              | 1.97            | 6.01            | 6.95             | 9.16           | 11.50           |
| 17               | 93.68                 | 0.32             | 3.71          | 0.28            | 1.74             | 0.95           | 6.84              | 1.40            | 6.91            | 7.47             | 7.66           | 10.70           |
| 20               | 73.85                 | 0.26             | 2.59          | 0.43            | 1.44             | 0.64           | 4.96              | 0.88            | 7.59            | 7.97             | 5.38           | 9.62            |
| 23               | 65.78                 | 0.26             | 1.42          | 0.64            | 1.21             | 0.66           | 3.52              | 0.50            | 8.14            | 8.37             | 3.64           | 9.13            |
| 26               | 64.01                 | 0.33             | 1.13          | 1.19            | 1.46             | 0.80           | 3.05              | 0.38            | 8.60            | 8.95             | 2.98           | 9.43            |
| 29               | 59.50                 | 0.42             | 1.14          | 2.03            | 2.51             | 0.80           | 2.86              | 0.42            | 8.87            | 9.62             | 2.66           | 9.98            |
| 32               | 56.51                 | 0.55             | 1.07          | 2.93            | 4.40             | 0.84           | 2.53              | 0.48            | 9.34            | 10.87            | 2.41           | 11.13           |
| 35               | 54.47                 | 0.71             | 1.02          | 3.70            | 6.60             | 0.98           | 2.22              | 0.53            | 10.47           | 13.01            | 2.28           | 13.21           |
| 38               | 52.74                 | 0.85             | 1.10          | 4.27            | 8.67             | 1.14           | 1.99              | 0.58            | 12.10           | 15.56            | 2.28           | 15.72           |
| 41               | 51.96                 | 0.95             | 1.26          | 4.62            | 10.27            | 1.27           | 1.85              | 0.62            | 13.60           | 17.73            | 2.35           | 17.88           |

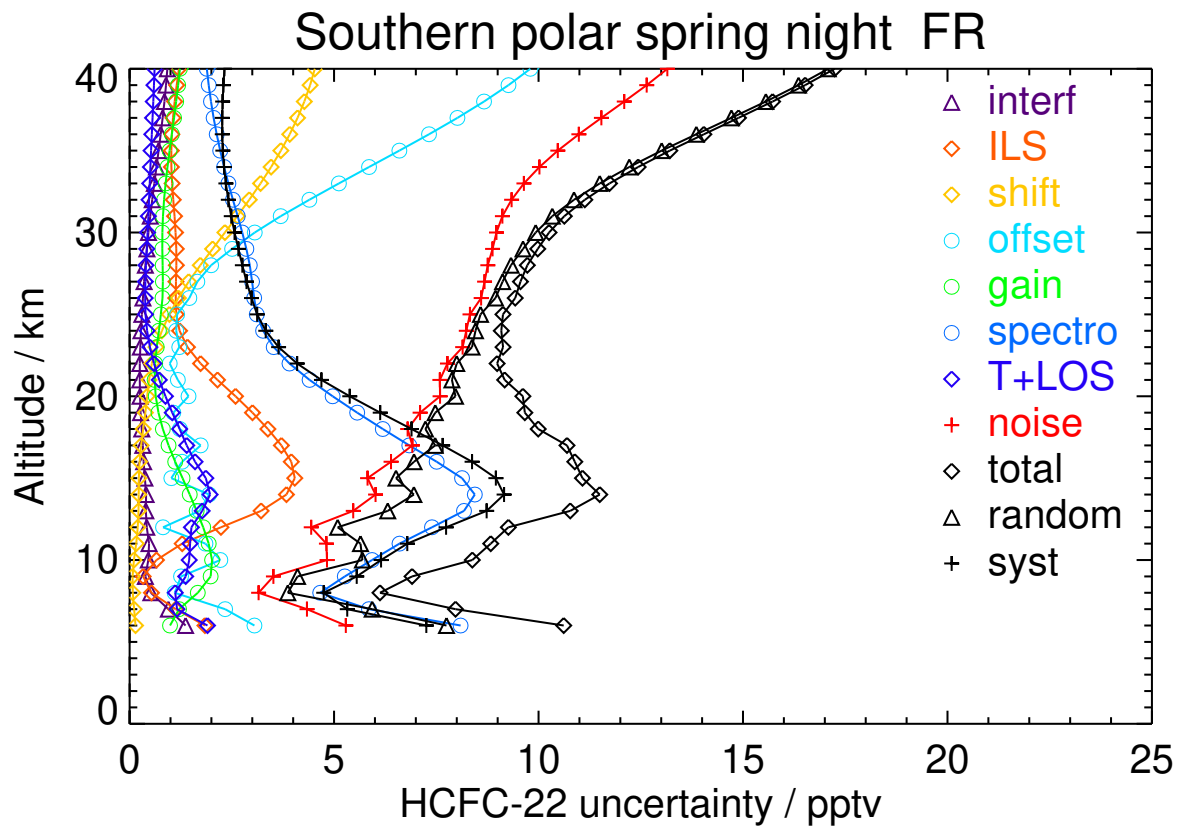

**Figure S30.** V8H\_F-22\_61 Southern polar spring night



**Table S32.** HCFC-22 error budget for Southern polar summer day. All uncertainties are  $1\sigma$ .

| altitude<br>(km) | mean target<br>(pptv) | interf<br>(pptv) | ILS<br>(pptv) | shift<br>(pptv) | offset<br>(pptv) | gain<br>(pptv) | spectro<br>(pptv) | T+LOS<br>(pptv) | noise<br>(pptv) | random<br>(pptv) | syst<br>(pptv) | total<br>(pptv) |
|------------------|-----------------------|------------------|---------------|-----------------|------------------|----------------|-------------------|-----------------|-----------------|------------------|----------------|-----------------|
| 5                | 141.94                | 1.77             | 0.71          | 0.39            | 2.67             | 1.96           | 10.77             | 3.09            | 5.31            | 9.49             | 8.86           | 12.98           |
| 8                | 147.60                | 0.39             | 0.48          | 0.15            | 0.75             | 2.05           | 5.18              | 1.63            | 2.96            | 4.19             | 5.09           | 6.59            |
| 11               | 143.00                | 0.58             | 0.75          | 0.11            | 1.01             | 0.81           | 5.23              | 1.00            | 3.69            | 4.62             | 4.82           | 6.67            |
| 14               | 130.72                | 0.39             | 1.72          | 0.10            | 1.22             | 1.92           | 7.52              | 1.28            | 4.64            | 5.09             | 7.88           | 9.38            |
| 17               | 114.88                | 0.31             | 2.96          | 0.21            | 1.33             | 1.26           | 6.14              | 1.02            | 5.54            | 5.87             | 6.87           | 9.04            |
| 20               | 99.39                 | 0.25             | 2.43          | 0.38            | 1.30             | 1.30           | 5.34              | 0.69            | 6.50            | 6.76             | 5.93           | 8.99            |
| 23               | 90.49                 | 0.24             | 1.48          | 0.52            | 1.07             | 1.47           | 4.36              | 0.40            | 7.40            | 7.57             | 4.72           | 8.93            |
| 26               | 84.20                 | 0.27             | 1.20          | 0.81            | 1.09             | 1.24           | 3.86              | 0.33            | 8.10            | 8.25             | 4.16           | 9.24            |
| 29               | 79.11                 | 0.33             | 1.15          | 1.35            | 1.84             | 1.00           | 3.47              | 0.35            | 8.59            | 8.91             | 3.75           | 9.67            |
| 32               | 72.05                 | 0.45             | 1.03          | 2.16            | 3.31             | 1.01           | 3.03              | 0.41            | 8.95            | 9.81             | 3.33           | 10.36           |
| 35               | 66.39                 | 0.62             | 0.85          | 3.00            | 5.17             | 1.17           | 2.65              | 0.50            | 9.77            | 11.49            | 2.97           | 11.87           |
| 38               | 61.01                 | 0.81             | 0.82          | 3.76            | 7.04             | 1.38           | 2.33              | 0.59            | 11.16           | 13.77            | 2.77           | 14.05           |
| 41               | 56.48                 | 0.97             | 0.91          | 4.31            | 8.59             | 1.53           | 2.11              | 0.68            | 12.65           | 15.94            | 2.68           | 16.16           |

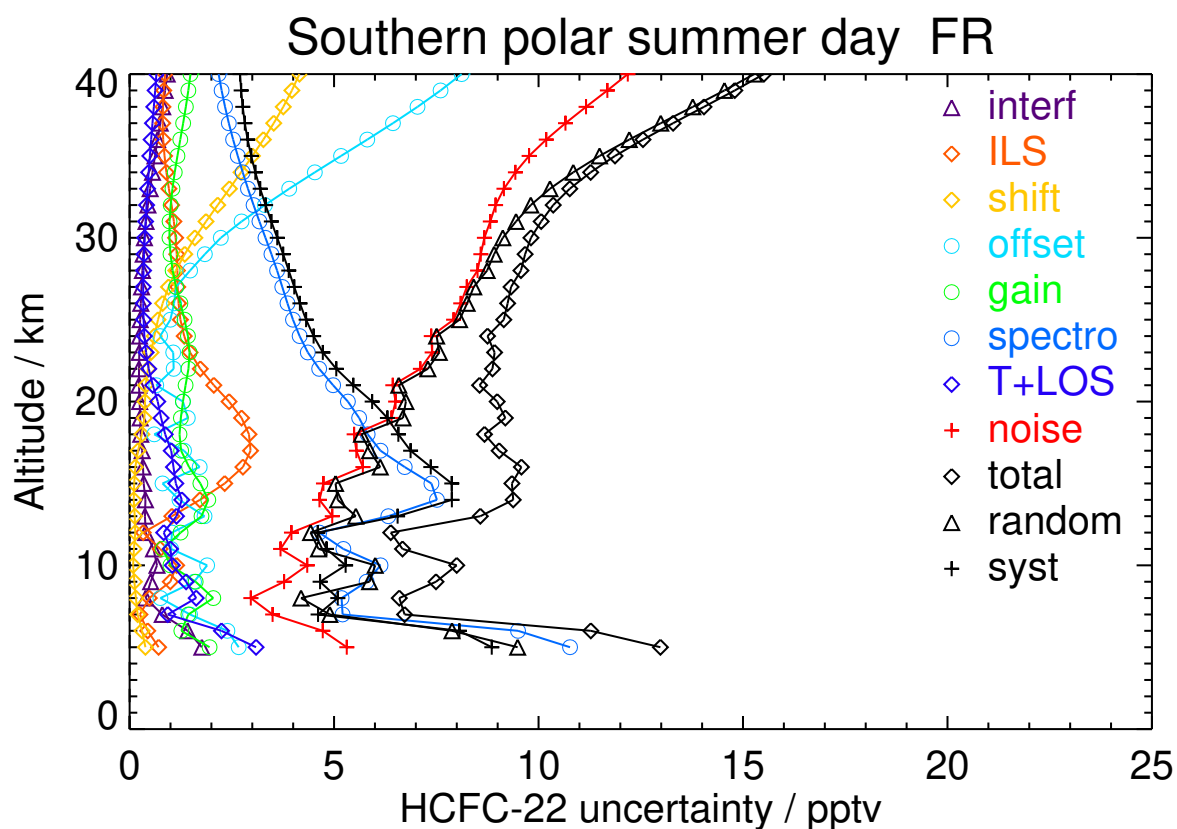**Figure S31.** V8H\_F-22\_61 Southern polar summer day

Table S33. HCFC-22 error budget for Southern polar summer night. All uncertainties are  $1\sigma$ .

| altitude<br>(km) | mean target<br>(pptv) | interf<br>(pptv) | ILS<br>(pptv) | shift<br>(pptv) | offset<br>(pptv) | gain<br>(pptv) | spectro<br>(pptv) | T+LOS<br>(pptv) | noise<br>(pptv) | random<br>(pptv) | syst<br>(pptv) | total<br>(pptv) |
|------------------|-----------------------|------------------|---------------|-----------------|------------------|----------------|-------------------|-----------------|-----------------|------------------|----------------|-----------------|
| 5                | 150.44                | 1.58             | 0.33          | 0.36            | 2.61             | 0.32           | 5.81              | 2.11            | 5.13            | 6.34             | 5.83           | 8.61            |
| 8                | 141.68                | 1.25             | 1.85          | 0.09            | 2.56             | 1.08           | 10.79             | 2.35            | 5.14            | 7.88             | 9.95           | 12.70           |
| 11               | 143.28                | 0.35             | 0.33          | 0.07            | 1.28             | 1.62           | 5.16              | 0.95            | 3.68            | 4.42             | 5.10           | 6.75            |
| 14               | 137.07                | 0.36             | 1.67          | 0.10            | 0.84             | 1.76           | 6.66              | 0.98            | 4.33            | 4.62             | 7.03           | 8.41            |
| 17               | 117.99                | 0.30             | 3.04          | 0.28            | 0.65             | 1.60           | 6.94              | 1.02            | 5.28            | 5.49             | 7.70           | 9.46            |
| 20               | 101.67                | 0.24             | 1.94          | 0.36            | 0.77             | 1.16           | 5.43              | 0.66            | 6.31            | 6.45             | 5.84           | 8.70            |
| 23               | 90.69                 | 0.23             | 1.01          | 0.50            | 0.87             | 0.99           | 4.48              | 0.39            | 7.36            | 7.46             | 4.67           | 8.80            |
| 26               | 81.84                 | 0.27             | 0.97          | 0.77            | 1.23             | 0.91           | 3.98              | 0.34            | 8.26            | 8.41             | 4.17           | 9.39            |
| 29               | 73.68                 | 0.34             | 0.98          | 1.25            | 2.36             | 0.88           | 3.48              | 0.34            | 8.84            | 9.27             | 3.69           | 9.97            |
| 32               | 65.04                 | 0.45             | 0.90          | 1.89            | 4.22             | 0.97           | 2.98              | 0.38            | 9.47            | 10.57            | 3.21           | 11.05           |
| 35               | 59.76                 | 0.61             | 0.86          | 2.53            | 6.29             | 1.14           | 2.59              | 0.45            | 10.67           | 12.69            | 2.89           | 13.01           |
| 38               | 56.57                 | 0.77             | 0.92          | 3.07            | 8.19             | 1.31           | 2.31              | 0.54            | 12.33           | 15.16            | 2.74           | 15.41           |
| 41               | 54.18                 | 0.89             | 1.04          | 3.44            | 9.62             | 1.45           | 2.13              | 0.61            | 13.80           | 17.22            | 2.69           | 17.43           |

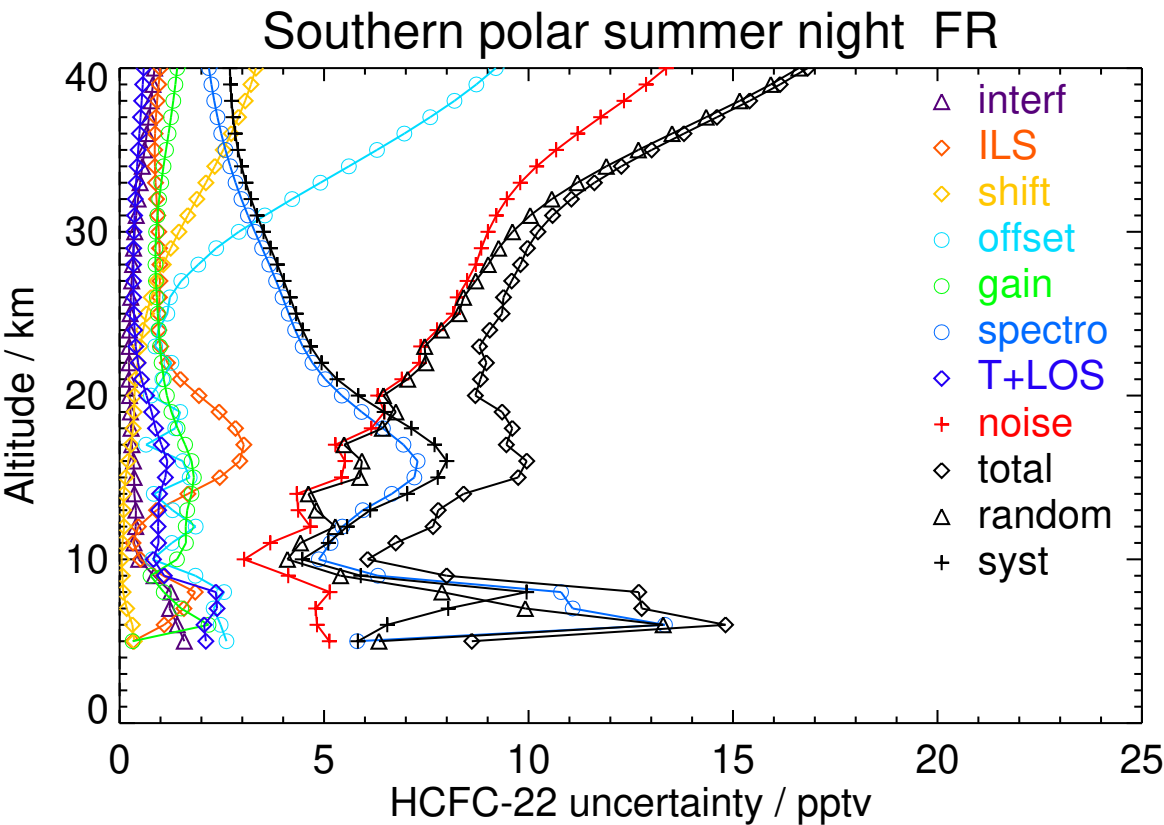

Figure S32. V8H\_F-22\_61 Southern polar summer night

Table S34. HCFC-22 error budget for Southern polar autumn day. All uncertainties are  $1\sigma$ .

| altitude<br>(km) | mean target<br>(pptv) | interf<br>(pptv) | ILS<br>(pptv) | shift<br>(pptv) | offset<br>(pptv) | gain<br>(pptv) | spectro<br>(pptv) | T+LOS<br>(pptv) | noise<br>(pptv) | random<br>(pptv) | syst<br>(pptv) | total<br>(pptv) |
|------------------|-----------------------|------------------|---------------|-----------------|------------------|----------------|-------------------|-----------------|-----------------|------------------|----------------|-----------------|
| 5                | 146.03                | 1.29             | 0.40          | 0.32            | 2.40             | 1.16           | 5.28              | 1.02            | 4.12            | 5.55             | 4.90           | 7.41            |
| 8                | 145.18                | 0.90             | 0.80          | 0.08            | 2.18             | 0.85           | 5.91              | 0.93            | 3.96            | 5.29             | 5.52           | 7.65            |
| 11               | 142.44                | 0.39             | 0.35          | 0.07            | 2.09             | 1.71           | 5.53              | 1.01            | 4.23            | 5.00             | 5.66           | 7.55            |
| 14               | 131.47                | 0.35             | 1.99          | 0.15            | 1.94             | 2.04           | 7.75              | 1.21            | 5.02            | 5.60             | 8.21           | 9.94            |
| 17               | 107.14                | 0.31             | 2.43          | 0.31            | 1.56             | 1.57           | 6.90              | 0.96            | 5.88            | 6.21             | 7.45           | 9.70            |
| 20               | 93.98                 | 0.24             | 1.42          | 0.36            | 1.20             | 1.30           | 5.31              | 0.60            | 6.85            | 7.06             | 5.57           | 8.99            |
| 23               | 82.33                 | 0.24             | 0.94          | 0.45            | 1.28             | 1.18           | 4.44              | 0.41            | 7.91            | 8.07             | 4.63           | 9.31            |
| 26               | 73.75                 | 0.28             | 0.79          | 0.62            | 2.46             | 0.99           | 3.88              | 0.36            | 8.86            | 9.25             | 4.03           | 10.09           |
| 29               | 63.18                 | 0.34             | 0.71          | 0.89            | 4.83             | 0.91           | 3.24              | 0.35            | 9.84            | 11.02            | 3.39           | 11.53           |
| 32               | 52.73                 | 0.45             | 0.69          | 1.22            | 7.71             | 0.95           | 2.61              | 0.39            | 11.42           | 13.87            | 2.80           | 14.14           |
| 35               | 45.25                 | 0.57             | 0.73          | 1.53            | 10.27            | 1.03           | 2.14              | 0.46            | 13.34           | 16.93            | 2.40           | 17.10           |
| 38               | 40.54                 | 0.68             | 0.80          | 1.75            | 12.22            | 1.11           | 1.85              | 0.52            | 15.04           | 19.49            | 2.19           | 19.61           |
| 41               | 37.81                 | 0.74             | 0.88          | 1.90            | 13.49            | 1.16           | 1.68              | 0.57            | 16.16           | 21.17            | 2.10           | 21.28           |

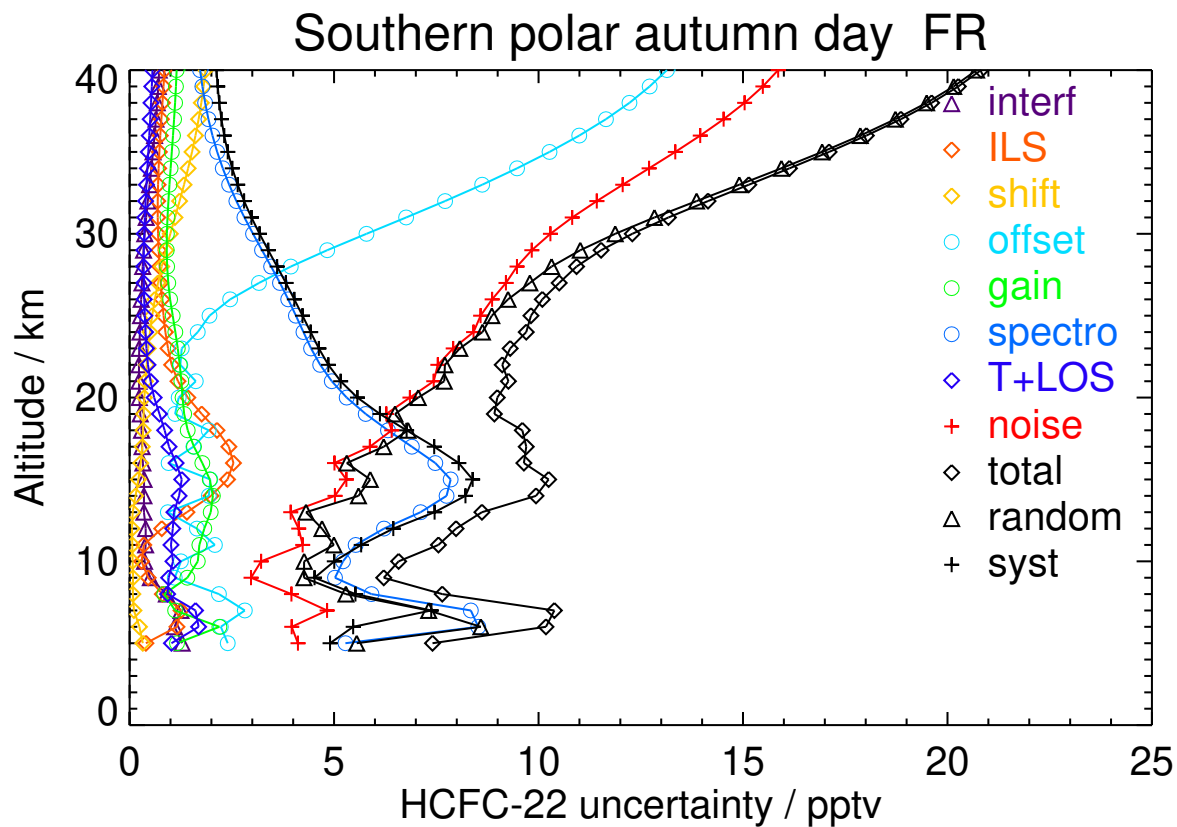

Figure S33. V8H\_F-22\_61 Southern polar autumn day

Table S35. HCFC-22 error budget for Southern polar autumn night. All uncertainties are  $1\sigma$ .

| altitude<br>(km) | mean target<br>(pptv) | interf<br>(pptv) | ILS<br>(pptv) | shift<br>(pptv) | offset<br>(pptv) | gain<br>(pptv) | spectro<br>(pptv) | T+LOS<br>(pptv) | noise<br>(pptv) | random<br>(pptv) | syst<br>(pptv) | total<br>(pptv) |
|------------------|-----------------------|------------------|---------------|-----------------|------------------|----------------|-------------------|-----------------|-----------------|------------------|----------------|-----------------|
| 5                | 145.94                | 1.25             | 0.30          | 0.29            | 2.44             | 0.93           | 6.21              | 1.31            | 4.15            | 5.92             | 5.57           | 8.13            |
| 8                | 146.48                | 0.73             | 0.60          | 0.10            | 2.13             | 1.26           | 5.06              | 1.06            | 3.95            | 5.24             | 4.69           | 7.03            |
| 11               | 143.10                | 0.39             | 0.29          | 0.06            | 1.63             | 1.57           | 5.11              | 0.91            | 3.92            | 4.52             | 5.22           | 6.90            |
| 14               | 130.95                | 0.36             | 1.66          | 0.14            | 1.37             | 2.02           | 7.46              | 1.17            | 4.77            | 5.20             | 7.85           | 9.42            |
| 17               | 110.41                | 0.30             | 2.38          | 0.29            | 1.12             | 1.53           | 6.87              | 1.01            | 5.75            | 6.04             | 7.36           | 9.52            |
| 20               | 95.35                 | 0.24             | 1.64          | 0.35            | 1.08             | 1.23           | 5.73              | 0.69            | 6.94            | 7.15             | 6.00           | 9.33            |
| 23               | 84.79                 | 0.24             | 0.90          | 0.42            | 1.46             | 1.02           | 4.74              | 0.45            | 8.13            | 8.32             | 4.88           | 9.65            |
| 26               | 73.31                 | 0.29             | 0.70          | 0.57            | 2.99             | 0.93           | 4.05              | 0.39            | 9.21            | 9.73             | 4.18           | 10.59           |
| 29               | 61.77                 | 0.36             | 0.68          | 0.82            | 5.65             | 0.89           | 3.34              | 0.37            | 10.45           | 11.94            | 3.48           | 12.43           |
| 32               | 50.48                 | 0.47             | 0.76          | 1.11            | 8.64             | 0.90           | 2.70              | 0.42            | 12.32           | 15.12            | 2.87           | 15.39           |
| 35               | 41.96                 | 0.58             | 0.87          | 1.36            | 11.16            | 0.92           | 2.21              | 0.49            | 14.29           | 18.21            | 2.46           | 18.38           |
| 38               | 36.34                 | 0.68             | 0.99          | 1.55            | 13.02            | 0.95           | 1.89              | 0.55            | 15.88           | 20.62            | 2.23           | 20.74           |
| 41               | 31.13                 | 0.74             | 1.11          | 1.73            | 13.93            | 1.01           | 1.66              | 0.58            | 16.63           | 21.79            | 2.14           | 21.90           |

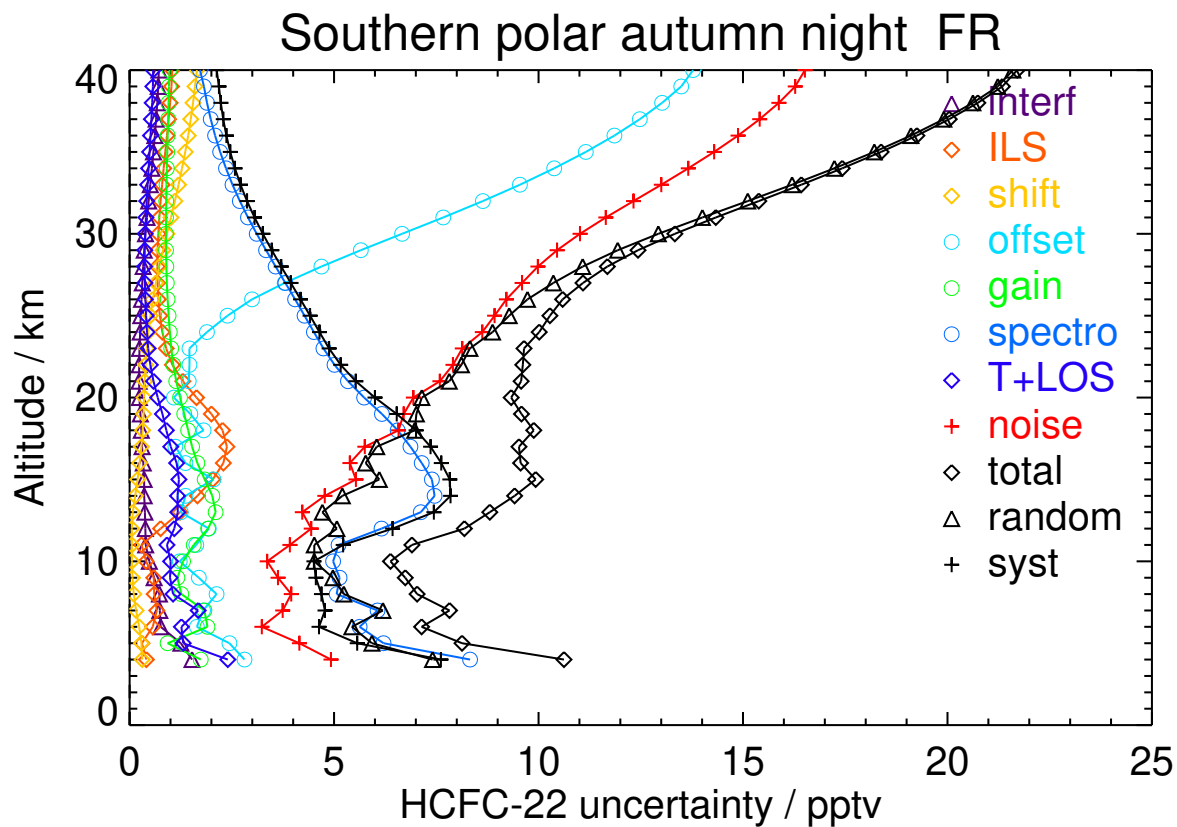

Figure S34. V8H\_F-22\_61 Southern polar autumn night

**Table S36.** HCFC-22 error budget for Northern polar winter day. All uncertainties are  $1\sigma$ .

| altitude<br>(km) | mean target<br>(pptv) | interf<br>(pptv) | ILS<br>(pptv) | shift<br>(pptv) | offset<br>(pptv) | gain<br>(pptv) | spectro<br>(pptv) | T+LOS<br>(pptv) | noise<br>(pptv) | random<br>(pptv) | syst<br>(pptv) | total<br>(pptv) |
|------------------|-----------------------|------------------|---------------|-----------------|------------------|----------------|-------------------|-----------------|-----------------|------------------|----------------|-----------------|
| 8                | 197.58                | 0.96             | 1.29          | 0.09            | 0.71             | 1.90           | 6.52              | 1.14            | 4.99            | 6.04             | 6.24           | 8.68            |
| 11               | 180.03                | 0.46             | 3.05          | 0.23            | 0.53             | 2.36           | 8.86              | 1.30            | 4.45            | 5.08             | 9.46           | 10.74           |
| 14               | 158.96                | 0.39             | 4.60          | 0.37            | 0.45             | 2.20           | 9.38              | 1.28            | 4.92            | 5.49             | 10.50          | 11.84           |
| 17               | 135.82                | 0.40             | 3.65          | 0.52            | 0.45             | 1.73           | 7.28              | 0.83            | 5.44            | 5.83             | 8.13           | 10.01           |
| 20               | 129.52                | 0.36             | 1.33          | 0.76            | 0.54             | 1.37           | 5.78              | 0.51            | 5.96            | 6.51             | 5.62           | 8.60            |
| 23               | 126.31                | 0.39             | 0.98          | 0.83            | 0.66             | 1.41           | 5.08              | 0.37            | 6.89            | 7.18             | 5.11           | 8.81            |
| 26               | 119.98                | 0.45             | 1.18          | 0.86            | 1.20             | 1.42           | 4.86              | 0.34            | 7.83            | 8.07             | 5.06           | 9.53            |
| 29               | 108.85                | 0.53             | 1.29          | 0.88            | 2.61             | 1.27           | 4.47              | 0.32            | 8.48            | 8.99             | 4.72           | 10.15           |
| 32               | 97.46                 | 0.65             | 1.40          | 0.87            | 4.64             | 1.27           | 3.99              | 0.31            | 10.25           | 11.35            | 4.31           | 12.14           |
| 35               | 88.76                 | 0.77             | 1.42          | 0.87            | 6.56             | 1.31           | 3.62              | 0.32            | 12.49           | 14.19            | 3.98           | 14.74           |
| 38               | 82.27                 | 0.84             | 1.41          | 0.87            | 8.04             | 1.36           | 3.35              | 0.34            | 14.34           | 16.52            | 3.75           | 16.94           |
| 41               | 70.72                 | 0.91             | 1.51          | 1.04            | 8.69             | 1.30           | 2.75              | 0.38            | 15.06           | 17.47            | 3.28           | 17.78           |

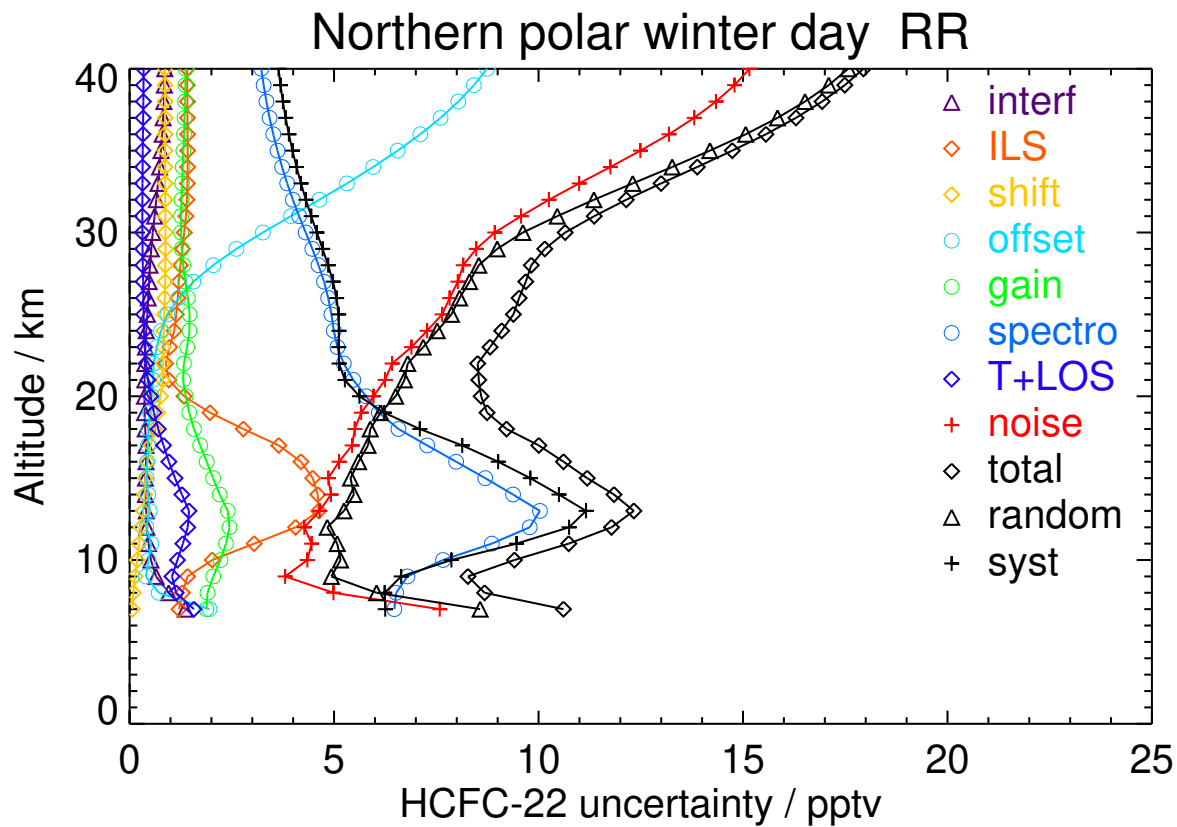

**Figure S35.** V8R\_F-22\_261 Northern polar winter day

**Table S37.** HCFC-22 error budget for Northern polar winter night. All uncertainties are  $1\sigma$ .

| altitude<br>(km) | mean target<br>(pptv) | interf<br>(pptv) | ILS<br>(pptv) | shift<br>(pptv) | offset<br>(pptv) | gain<br>(pptv) | spectro<br>(pptv) | T+LOS<br>(pptv) | noise<br>(pptv) | random<br>(pptv) | syst<br>(pptv) | total<br>(pptv) |
|------------------|-----------------------|------------------|---------------|-----------------|------------------|----------------|-------------------|-----------------|-----------------|------------------|----------------|-----------------|
| 8                | 203.07                | 0.86             | 1.84          | 0.08            | 0.53             | 1.77           | 7.13              | 1.29            | 4.25            | 6.19             | 6.31           | 8.84            |
| 11               | 185.84                | 0.51             | 2.79          | 0.22            | 0.47             | 2.23           | 8.79              | 1.27            | 4.47            | 5.16             | 9.25           | 10.59           |
| 14               | 162.03                | 0.40             | 4.71          | 0.32            | 0.49             | 1.92           | 9.65              | 1.38            | 5.07            | 5.54             | 10.78          | 12.13           |
| 17               | 135.29                | 0.41             | 3.84          | 0.43            | 0.51             | 1.28           | 8.09              | 1.02            | 5.73            | 6.05             | 8.93           | 10.78           |
| 20               | 112.72                | 0.37             | 2.09          | 0.62            | 0.68             | 1.33           | 5.96              | 0.69            | 6.35            | 6.69             | 6.22           | 9.13            |
| 23               | 101.75                | 0.40             | 1.50          | 0.76            | 0.82             | 1.99           | 4.48              | 0.45            | 7.33            | 7.78             | 4.59           | 9.03            |
| 26               | 99.47                 | 0.47             | 1.46          | 0.95            | 1.03             | 1.65           | 3.87              | 0.38            | 7.93            | 8.33             | 3.95           | 9.22            |
| 29               | 95.47                 | 0.58             | 1.46          | 1.30            | 1.89             | 1.10           | 3.60              | 0.41            | 8.25            | 8.77             | 3.64           | 9.49            |
| 32               | 85.95                 | 0.73             | 1.63          | 1.61            | 3.44             | 0.99           | 3.25              | 0.45            | 9.00            | 9.93             | 3.42           | 10.50           |
| 35               | 77.56                 | 0.89             | 1.62          | 1.83            | 5.16             | 1.03           | 2.91              | 0.48            | 10.69           | 12.14            | 3.18           | 12.55           |
| 38               | 73.08                 | 1.00             | 1.58          | 1.95            | 6.70             | 1.11           | 2.66              | 0.49            | 12.65           | 14.55            | 3.03           | 14.86           |
| 41               | 70.26                 | 1.06             | 1.55          | 1.98            | 7.84             | 1.18           | 2.51              | 0.51            | 14.12           | 16.36            | 2.94           | 16.62           |

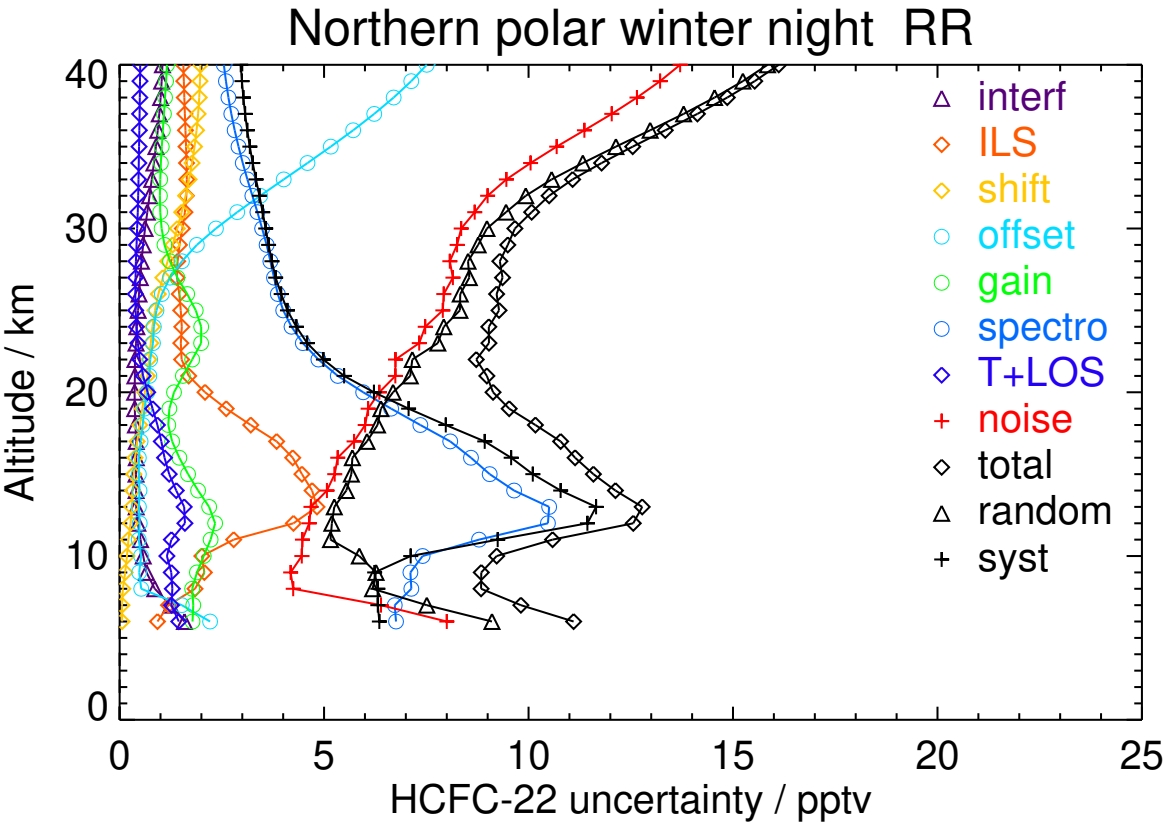

**Figure S36.** V8R\_F-22\_261 Northern polar winter night

**Table S38.** HCFC-22 error budget for Northern polar spring day. All uncertainties are  $1\sigma$ .

| altitude<br>(km) | mean target<br>(pptv) | interf<br>(pptv) | ILS<br>(pptv) | shift<br>(pptv) | offset<br>(pptv) | gain<br>(pptv) | spectro<br>(pptv) | T+LOS<br>(pptv) | noise<br>(pptv) | random<br>(pptv) | syst<br>(pptv) | total<br>(pptv) |
|------------------|-----------------------|------------------|---------------|-----------------|------------------|----------------|-------------------|-----------------|-----------------|------------------|----------------|-----------------|
| 8                | 186.69                | 1.03             | 1.11          | 0.09            | 1.31             | 1.75           | 6.11              | 1.29            | 6.44            | 7.25             | 5.91           | 9.35            |
| 11               | 176.06                | 0.42             | 2.50          | 0.23            | 0.47             | 2.29           | 8.00              | 1.15            | 4.37            | 4.69             | 8.62           | 9.82            |
| 14               | 162.11                | 0.38             | 3.95          | 0.34            | 0.45             | 2.33           | 9.66              | 1.26            | 4.87            | 5.17             | 10.65          | 11.84           |
| 17               | 137.51                | 0.39             | 2.92          | 0.42            | 0.45             | 1.84           | 8.13              | 0.91            | 5.67            | 5.87             | 8.78           | 10.56           |
| 20               | 122.76                | 0.35             | 1.33          | 0.51            | 0.57             | 1.74           | 6.13              | 0.59            | 6.55            | 6.75             | 6.39           | 9.29            |
| 23               | 114.29                | 0.36             | 0.86          | 0.42            | 0.82             | 1.51           | 5.13              | 0.37            | 7.74            | 7.87             | 5.34           | 9.51            |
| 26               | 103.43                | 0.44             | 0.87          | 0.44            | 1.69             | 1.22           | 4.47              | 0.32            | 8.81            | 9.02             | 4.68           | 10.16           |
| 29               | 92.70                 | 0.52             | 1.16          | 0.59            | 3.28             | 1.11           | 3.84              | 0.32            | 9.72            | 10.31            | 4.12           | 11.10           |
| 32               | 83.28                 | 0.68             | 1.43          | 0.85            | 5.18             | 1.10           | 3.28              | 0.41            | 11.23           | 12.44            | 3.69           | 12.97           |
| 35               | 76.00                 | 0.87             | 1.58          | 1.13            | 6.92             | 1.11           | 2.86              | 0.56            | 13.01           | 14.83            | 3.38           | 15.21           |
| 38               | 70.56                 | 1.04             | 1.68          | 1.36            | 8.33             | 1.14           | 2.57              | 0.69            | 14.72           | 17.03            | 3.19           | 17.32           |
| 41               | 66.56                 | 1.15             | 1.76          | 1.51            | 9.36             | 1.16           | 2.39              | 0.79            | 15.97           | 18.64            | 3.09           | 18.89           |

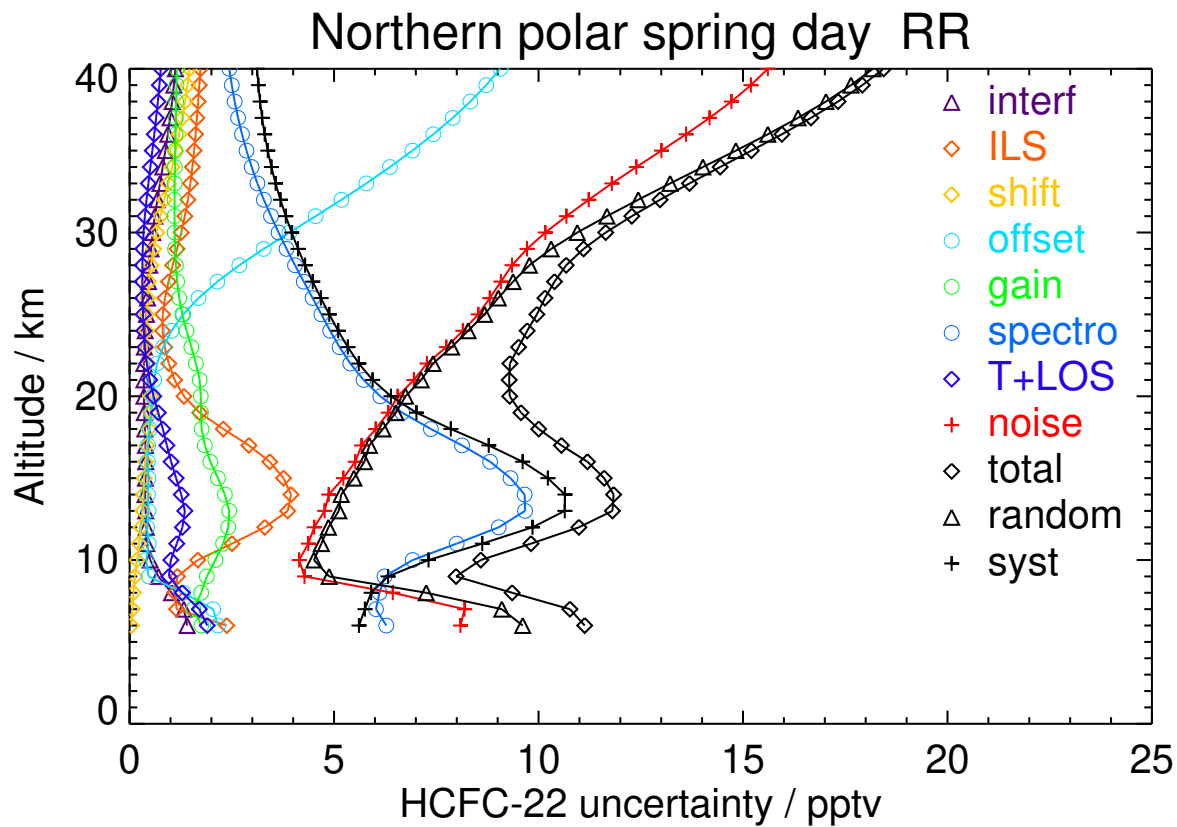

**Figure S37.** V8R\_F-22\_261 Northern polar spring day

**Table S39.** HCFC-22 error budget for Northern polar spring night. All uncertainties are  $1\sigma$ .

| altitude<br>(km) | mean target<br>(pptv) | interf<br>(pptv) | ILS<br>(pptv) | shift<br>(pptv) | offset<br>(pptv) | gain<br>(pptv) | spectro<br>(pptv) | T+LOS<br>(pptv) | noise<br>(pptv) | random<br>(pptv) | syst<br>(pptv) | total<br>(pptv) |
|------------------|-----------------------|------------------|---------------|-----------------|------------------|----------------|-------------------|-----------------|-----------------|------------------|----------------|-----------------|
| 8                | 190.11                | 1.16             | 1.70          | 0.11            | 1.87             | 1.90           | 6.62              | 1.54            | 7.64            | 8.95             | 5.98           | 10.76           |
| 11               | 179.80                | 0.45             | 2.34          | 0.24            | 0.47             | 2.15           | 7.73              | 1.11            | 4.37            | 5.04             | 8.08           | 9.52            |
| 14               | 166.96                | 0.39             | 4.20          | 0.37            | 0.47             | 2.31           | 9.64              | 1.31            | 4.86            | 5.26             | 10.68          | 11.91           |
| 17               | 147.91                | 0.39             | 3.65          | 0.44            | 0.48             | 1.94           | 8.79              | 0.99            | 5.63            | 5.86             | 9.66           | 11.30           |
| 20               | 125.21                | 0.34             | 1.47          | 0.51            | 0.62             | 1.53           | 6.73              | 0.70            | 6.44            | 6.64             | 6.97           | 9.62            |
| 23               | 112.82                | 0.36             | 0.77          | 0.43            | 0.89             | 1.30           | 5.22              | 0.42            | 7.68            | 7.81             | 5.37           | 9.48            |
| 26               | 103.86                | 0.44             | 0.90          | 0.45            | 1.74             | 1.11           | 4.37              | 0.33            | 8.74            | 8.96             | 4.56           | 10.05           |
| 29               | 94.46                 | 0.52             | 1.20          | 0.61            | 3.33             | 1.07           | 3.69              | 0.32            | 9.61            | 10.23            | 3.98           | 10.97           |
| 32               | 86.58                 | 0.67             | 1.40          | 0.87            | 5.23             | 1.09           | 3.14              | 0.41            | 11.08           | 12.32            | 3.56           | 12.82           |
| 35               | 80.82                 | 0.86             | 1.51          | 1.15            | 6.96             | 1.14           | 2.76              | 0.55            | 12.87           | 14.73            | 3.29           | 15.09           |
| 38               | 75.89                 | 1.02             | 1.59          | 1.37            | 8.39             | 1.19           | 2.52              | 0.68            | 14.59           | 16.94            | 3.14           | 17.23           |
| 41               | 72.20                 | 1.13             | 1.66          | 1.52            | 9.42             | 1.23           | 2.38              | 0.78            | 15.84           | 18.55            | 3.07           | 18.80           |

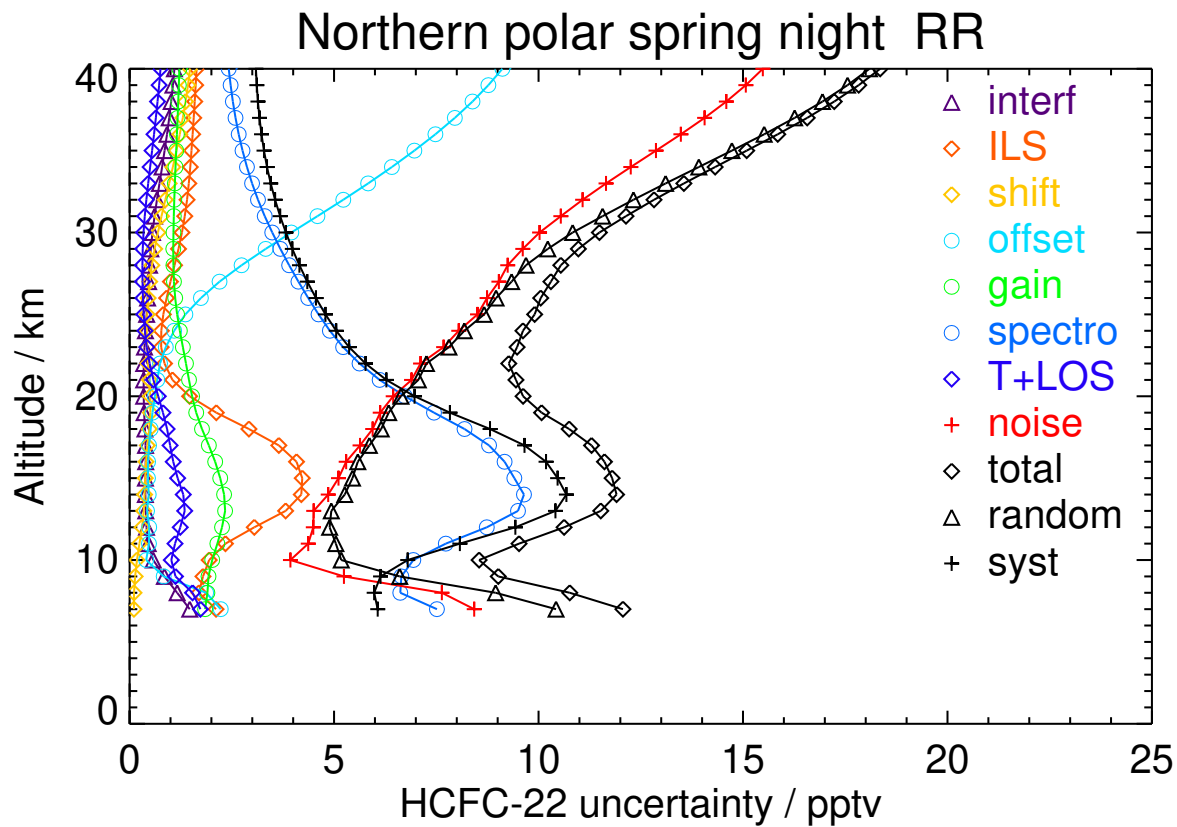

**Figure S38.** V8R\_F-22\_261 Northern polar spring night



**Table S40.** HCFC-22 error budget for Northern polar summer day. All uncertainties are  $1\sigma$ .

| altitude<br>(km) | mean target<br>(pptv) | interf<br>(pptv) | ILS<br>(pptv) | shift<br>(pptv) | offset<br>(pptv) | gain<br>(pptv) | spectro<br>(pptv) | T+LOS<br>(pptv) | noise<br>(pptv) | random<br>(pptv) | syst<br>(pptv) | total<br>(pptv) |
|------------------|-----------------------|------------------|---------------|-----------------|------------------|----------------|-------------------|-----------------|-----------------|------------------|----------------|-----------------|
| 8                | 215.54                | 1.54             | 1.76          | 0.10            | 1.42             | 2.08           | 6.45              | 0.66            | 7.42            | 7.75             | 7.00           | 10.44           |
| 11               | 193.92                | 0.78             | 3.49          | 0.13            | 0.45             | 1.46           | 8.50              | 1.55            | 4.11            | 7.35             | 7.26           | 10.33           |
| 14               | 183.26                | 0.43             | 4.15          | 0.33            | 0.33             | 2.04           | 8.71              | 1.04            | 4.44            | 4.92             | 9.70           | 10.88           |
| 17               | 167.10                | 0.39             | 4.42          | 0.39            | 0.38             | 2.11           | 9.51              | 1.08            | 5.14            | 5.41             | 10.64          | 11.94           |
| 20               | 141.69                | 0.34             | 1.62          | 0.55            | 0.49             | 1.77           | 7.74              | 0.73            | 5.73            | 5.89             | 8.06           | 9.98            |
| 23               | 122.95                | 0.35             | 0.76          | 0.52            | 0.57             | 1.35           | 5.86              | 0.45            | 6.95            | 7.04             | 6.02           | 9.27            |
| 26               | 115.56                | 0.40             | 1.12          | 0.57            | 0.73             | 1.05           | 4.99              | 0.40            | 7.59            | 7.69             | 5.19           | 9.28            |
| 29               | 103.86                | 0.47             | 1.70          | 0.82            | 1.32             | 0.84           | 4.30              | 0.42            | 8.15            | 8.33             | 4.67           | 9.55            |
| 32               | 91.00                 | 0.60             | 1.85          | 1.24            | 2.48             | 0.79           | 3.49              | 0.48            | 8.55            | 9.04             | 4.00           | 9.88            |
| 35               | 80.79                 | 0.81             | 1.63          | 1.68            | 3.94             | 0.86           | 2.88              | 0.59            | 9.57            | 10.54            | 3.39           | 11.07           |
| 38               | 73.13                 | 1.01             | 1.45          | 2.04            | 5.40             | 0.98           | 2.49              | 0.72            | 11.15           | 12.63            | 2.99           | 12.97           |
| 41               | 67.33                 | 1.18             | 1.34          | 2.29            | 6.64             | 1.09           | 2.26              | 0.84            | 12.68           | 14.58            | 2.78           | 14.84           |

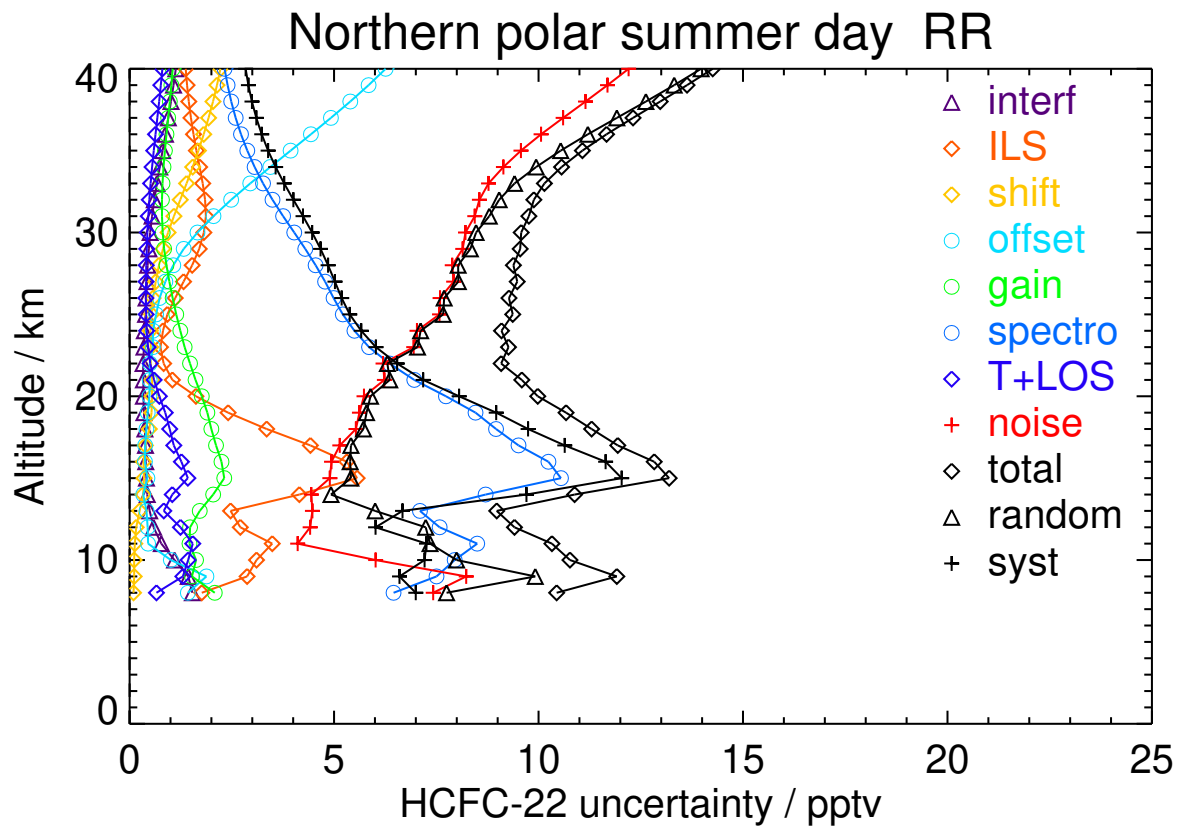

**Figure S39.** V8R\_F-22\_261 Northern polar summer day

**Table S41.** HCFC-22 error budget for Northern polar summer night. All uncertainties are  $1\sigma$ .

| altitude<br>(km) | mean target<br>(pptv) | interf<br>(pptv) | ILS<br>(pptv) | shift<br>(pptv) | offset<br>(pptv) | gain<br>(pptv) | spectro<br>(pptv) | T+LOS<br>(pptv) | noise<br>(pptv) | random<br>(pptv) | syst<br>(pptv) | total<br>(pptv) |
|------------------|-----------------------|------------------|---------------|-----------------|------------------|----------------|-------------------|-----------------|-----------------|------------------|----------------|-----------------|
| 14               | 184.73                | 0.54             | 3.44          | 0.29            | 0.61             | 2.22           | 9.15              | 1.32            | 5.42            | 5.76             | 9.96           | 11.51           |
| 17               | 165.18                | 0.40             | 3.85          | 0.41            | 0.47             | 2.11           | 9.48              | 1.34            | 5.53            | 5.81             | 10.41          | 11.92           |
| 20               | 140.38                | 0.34             | 1.85          | 0.50            | 0.48             | 1.77           | 7.75              | 0.90            | 6.10            | 6.27             | 8.12           | 10.26           |
| 23               | 122.50                | 0.36             | 0.89          | 0.51            | 0.58             | 1.37           | 6.02              | 0.50            | 7.21            | 7.29             | 6.22           | 9.58            |
| 26               | 111.09                | 0.42             | 1.12          | 0.61            | 0.86             | 1.06           | 5.07              | 0.42            | 7.97            | 8.07             | 5.28           | 9.65            |
| 29               | 95.80                 | 0.50             | 1.47          | 0.82            | 1.68             | 0.85           | 4.11              | 0.41            | 8.43            | 8.67             | 4.43           | 9.73            |
| 32               | 80.40                 | 0.62             | 1.52          | 1.11            | 3.08             | 0.84           | 3.20              | 0.45            | 9.13            | 9.74             | 3.62           | 10.39           |
| 35               | 71.13                 | 0.80             | 1.36          | 1.41            | 4.67             | 0.94           | 2.56              | 0.53            | 10.49           | 11.62            | 3.02           | 12.01           |
| 38               | 65.78                 | 0.96             | 1.21          | 1.65            | 6.16             | 1.08           | 2.21              | 0.63            | 12.29           | 13.90            | 2.69           | 14.16           |
| 41               | 62.41                 | 1.08             | 1.12          | 1.80            | 7.34             | 1.18           | 2.04              | 0.72            | 13.83           | 15.82            | 2.55           | 16.03           |

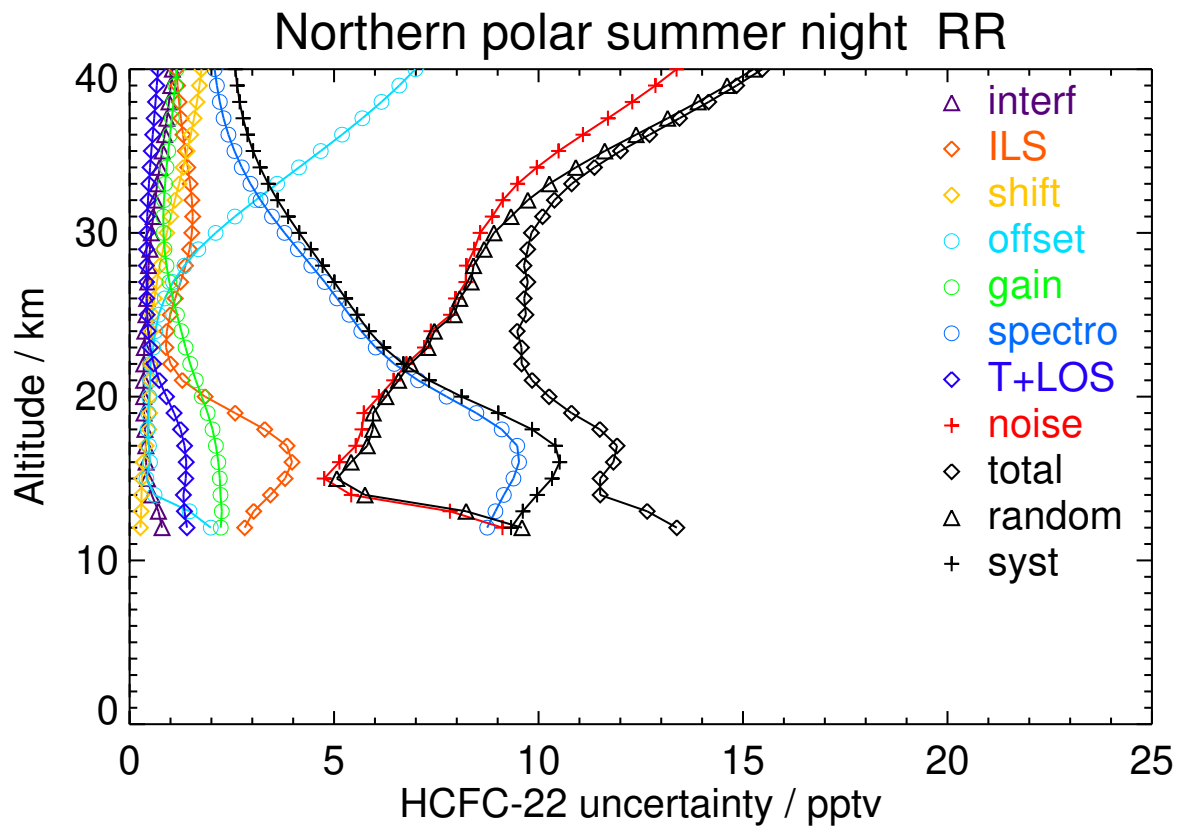

**Figure S40.** V8R\_F-22\_261 Northern polar summer night

**Table S42.** HCFC-22 error budget for Northern polar autumn day. All uncertainties are  $1\sigma$ .

| altitude<br>(km) | mean target<br>(pptv) | interf<br>(pptv) | ILS<br>(pptv) | shift<br>(pptv) | offset<br>(pptv) | gain<br>(pptv) | spectro<br>(pptv) | T+LOS<br>(pptv) | noise<br>(pptv) | random<br>(pptv) | syst<br>(pptv) | total<br>(pptv) |
|------------------|-----------------------|------------------|---------------|-----------------|------------------|----------------|-------------------|-----------------|-----------------|------------------|----------------|-----------------|
| 8                | 219.61                | 1.62             | 2.38          | 0.16            | 2.04             | 3.13           | 7.34              | 1.25            | 8.25            | 8.74             | 8.33           | 12.07           |
| 11               | 193.56                | 0.84             | 2.83          | 0.28            | 1.97             | 2.20           | 9.17              | 1.67            | 8.56            | 9.95             | 8.87           | 13.33           |
| 14               | 183.19                | 0.43             | 3.92          | 0.34            | 0.53             | 2.20           | 10.21             | 1.68            | 4.81            | 5.36             | 11.06          | 12.29           |
| 17               | 153.77                | 0.40             | 3.75          | 0.44            | 0.52             | 1.89           | 9.58              | 1.43            | 5.66            | 6.01             | 10.40          | 12.01           |
| 20               | 130.85                | 0.35             | 2.03          | 0.47            | 0.59             | 1.88           | 7.19              | 0.85            | 6.48            | 6.74             | 7.57           | 10.14           |
| 23               | 117.48                | 0.37             | 1.13          | 0.43            | 0.86             | 1.59           | 5.84              | 0.51            | 7.67            | 7.83             | 6.06           | 9.90            |
| 26               | 102.15                | 0.44             | 1.04          | 0.48            | 1.76             | 1.21           | 4.94              | 0.39            | 8.61            | 8.85             | 5.14           | 10.24           |
| 29               | 86.29                 | 0.54             | 1.20          | 0.61            | 3.42             | 1.05           | 4.01              | 0.34            | 9.60            | 10.26            | 4.26           | 11.10           |
| 32               | 75.09                 | 0.68             | 1.33          | 0.78            | 5.39             | 1.02           | 3.26              | 0.37            | 11.43           | 12.70            | 3.60           | 13.20           |
| 35               | 69.80                 | 0.83             | 1.40          | 0.93            | 7.13             | 1.05           | 2.79              | 0.43            | 13.40           | 15.26            | 3.21           | 15.59           |
| 38               | 67.54                 | 0.93             | 1.43          | 1.04            | 8.49             | 1.10           | 2.51              | 0.49            | 15.08           | 17.38            | 2.99           | 17.63           |
| 41               | 67.14                 | 1.03             | 1.54          | 1.33            | 8.88             | 1.08           | 2.37              | 0.57            | 15.60           | 18.06            | 2.89           | 18.29           |

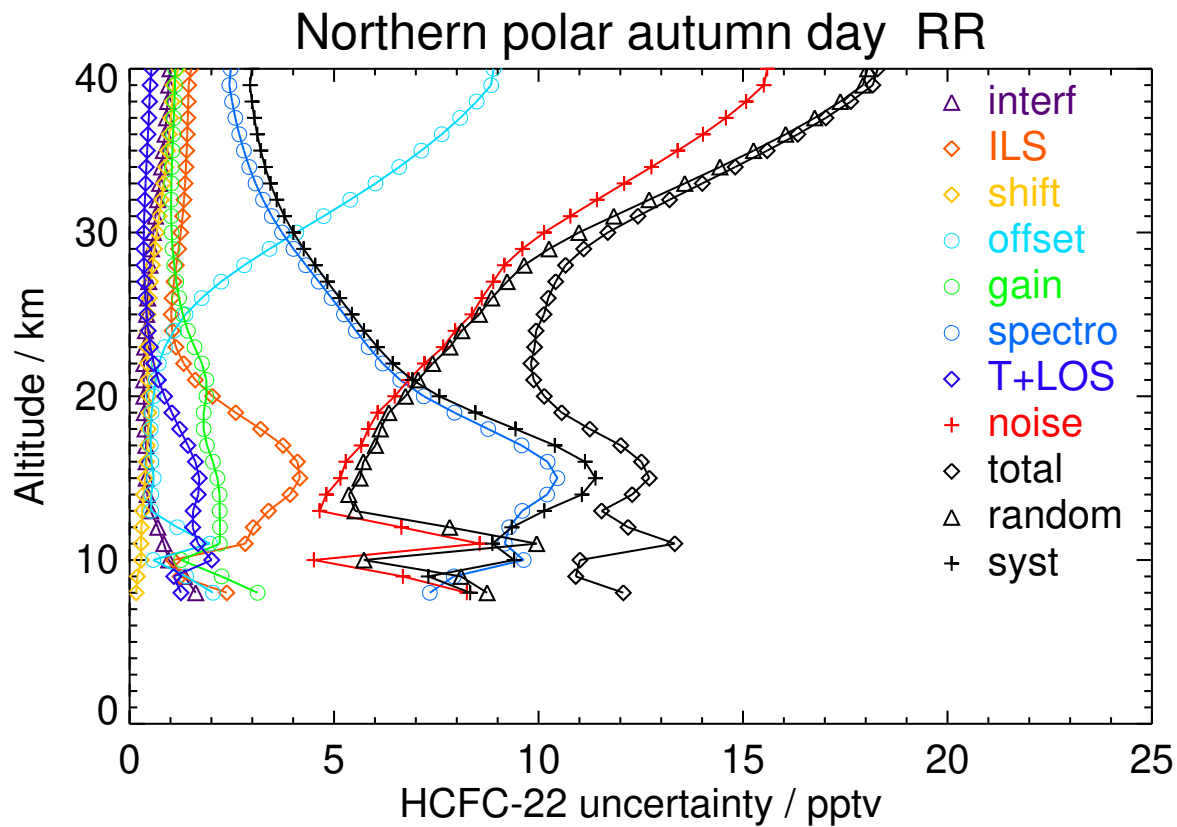

**Figure S41.** V8R\_F-22\_261 Northern polar autumn day

**Table S43.** HCFC-22 error budget for Northern polar autumn night. All uncertainties are  $1\sigma$ .

| altitude<br>(km) | mean target<br>(pptv) | interf<br>(pptv) | ILS<br>(pptv) | shift<br>(pptv) | offset<br>(pptv) | gain<br>(pptv) | spectro<br>(pptv) | T+LOS<br>(pptv) | noise<br>(pptv) | random<br>(pptv) | syst<br>(pptv) | total<br>(pptv) |
|------------------|-----------------------|------------------|---------------|-----------------|------------------|----------------|-------------------|-----------------|-----------------|------------------|----------------|-----------------|
| 8                | 206.96                | 1.64             | 0.59          | 0.28            | 1.90             | 1.79           | 6.20              | 0.84            | 7.95            | 8.39             | 6.47           | 10.59           |
| 11               | 190.03                | 0.83             | 2.86          | 0.30            | 2.04             | 2.28           | 9.33              | 1.58            | 8.48            | 10.00            | 8.94           | 13.41           |
| 14               | 180.12                | 0.43             | 4.13          | 0.36            | 0.55             | 2.37           | 10.23             | 1.66            | 4.83            | 5.33             | 11.20          | 12.41           |
| 17               | 150.06                | 0.40             | 3.62          | 0.44            | 0.51             | 1.92           | 9.24              | 1.36            | 5.64            | 5.93             | 10.07          | 11.68           |
| 20               | 130.15                | 0.35             | 1.67          | 0.47            | 0.61             | 1.50           | 7.03              | 0.81            | 6.46            | 6.68             | 7.28           | 9.87            |
| 23               | 112.24                | 0.37             | 0.97          | 0.44            | 0.89             | 1.26           | 5.74              | 0.51            | 7.68            | 7.83             | 5.88           | 9.79            |
| 26               | 96.81                 | 0.44             | 1.02          | 0.49            | 1.76             | 1.11           | 4.62              | 0.39            | 8.60            | 8.86             | 4.79           | 10.07           |
| 29               | 82.77                 | 0.53             | 1.21          | 0.65            | 3.36             | 1.03           | 3.60              | 0.35            | 9.52            | 10.17            | 3.85           | 10.88           |
| 32               | 72.43                 | 0.68             | 1.33          | 0.83            | 5.29             | 1.05           | 2.87              | 0.39            | 11.24           | 12.51            | 3.21           | 12.91           |
| 35               | 66.11                 | 0.82             | 1.35          | 0.98            | 7.02             | 1.10           | 2.46              | 0.45            | 13.19           | 15.03            | 2.87           | 15.30           |
| 38               | 61.72                 | 0.93             | 1.37          | 1.10            | 8.39             | 1.17           | 2.24              | 0.52            | 14.88           | 17.18            | 2.70           | 17.39           |
| 41               | 61.80                 | 1.03             | 1.42          | 1.37            | 8.87             | 1.26           | 2.23              | 0.61            | 15.54           | 18.02            | 2.72           | 18.22           |

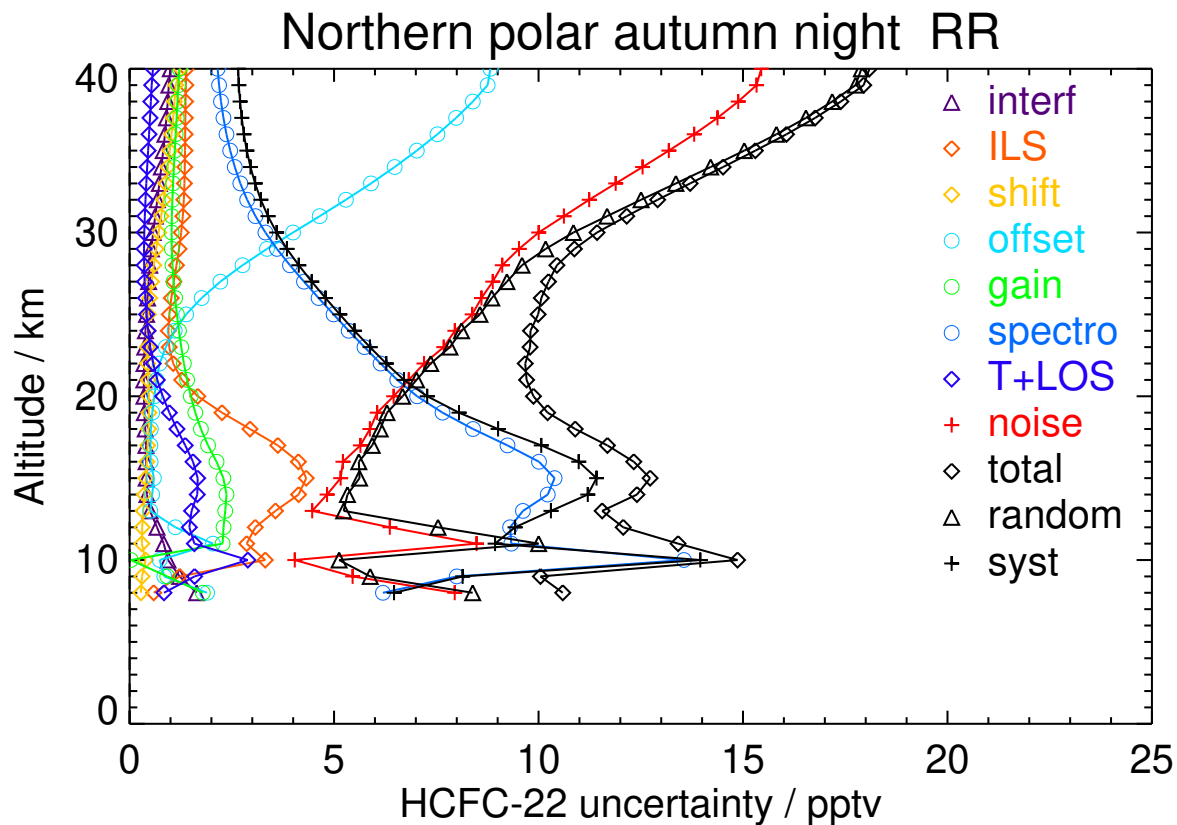

**Figure S42.** V8R\_F-22\_261 Northern polar autumn night

**Table S44.** HCFC-22 error budget for Northern midlatitude winter day. All uncertainties are  $1\sigma$ .

| altitude<br>(km) | mean target<br>(pptv) | interf<br>(pptv) | ILS<br>(pptv) | shift<br>(pptv) | offset<br>(pptv) | gain<br>(pptv) | spectro<br>(pptv) | T+LOS<br>(pptv) | noise<br>(pptv) | random<br>(pptv) | syst<br>(pptv) | total<br>(pptv) |
|------------------|-----------------------|------------------|---------------|-----------------|------------------|----------------|-------------------|-----------------|-----------------|------------------|----------------|-----------------|
| 8                | 201.10                | 1.01             | 1.23          | 0.20            | 0.82             | 1.75           | 6.68              | 1.07            | 5.04            | 6.30             | 6.15           | 8.80            |
| 11               | 192.07                | 0.55             | 2.40          | 0.23            | 0.61             | 2.24           | 7.88              | 1.10            | 4.33            | 6.34             | 7.31           | 9.68            |
| 14               | 173.55                | 0.39             | 4.12          | 0.34            | 0.43             | 2.31           | 9.68              | 1.24            | 4.77            | 5.15             | 10.69          | 11.87           |
| 17               | 159.24                | 0.39             | 3.61          | 0.40            | 0.47             | 2.05           | 8.97              | 0.98            | 5.49            | 5.85             | 9.75           | 11.37           |
| 20               | 136.71                | 0.35             | 2.07          | 0.54            | 0.57             | 1.79           | 7.18              | 0.78            | 6.24            | 6.51             | 7.54           | 9.96            |
| 23               | 130.43                | 0.37             | 1.18          | 0.61            | 0.69             | 1.38           | 5.67              | 0.47            | 7.13            | 7.28             | 5.86           | 9.35            |
| 26               | 122.55                | 0.44             | 1.33          | 0.70            | 1.10             | 1.16           | 5.11              | 0.40            | 7.99            | 8.16             | 5.34           | 9.75            |
| 29               | 116.09                | 0.52             | 1.71          | 0.92            | 2.13             | 1.01           | 4.54              | 0.39            | 8.43            | 8.80             | 4.91           | 10.07           |
| 32               | 107.69                | 0.64             | 1.89          | 1.17            | 3.78             | 1.03           | 4.03              | 0.41            | 9.29            | 10.15            | 4.52           | 11.11           |
| 35               | 96.61                 | 0.81             | 1.89          | 1.40            | 5.57             | 1.11           | 3.59              | 0.48            | 10.92           | 12.39            | 4.15           | 13.07           |
| 38               | 87.78                 | 0.95             | 1.86          | 1.56            | 7.15             | 1.20           | 3.26              | 0.54            | 12.81           | 14.81            | 3.87           | 15.31           |
| 41               | 82.00                 | 1.03             | 1.85          | 1.65            | 8.31             | 1.25           | 3.04              | 0.59            | 14.27           | 16.65            | 3.70           | 17.06           |

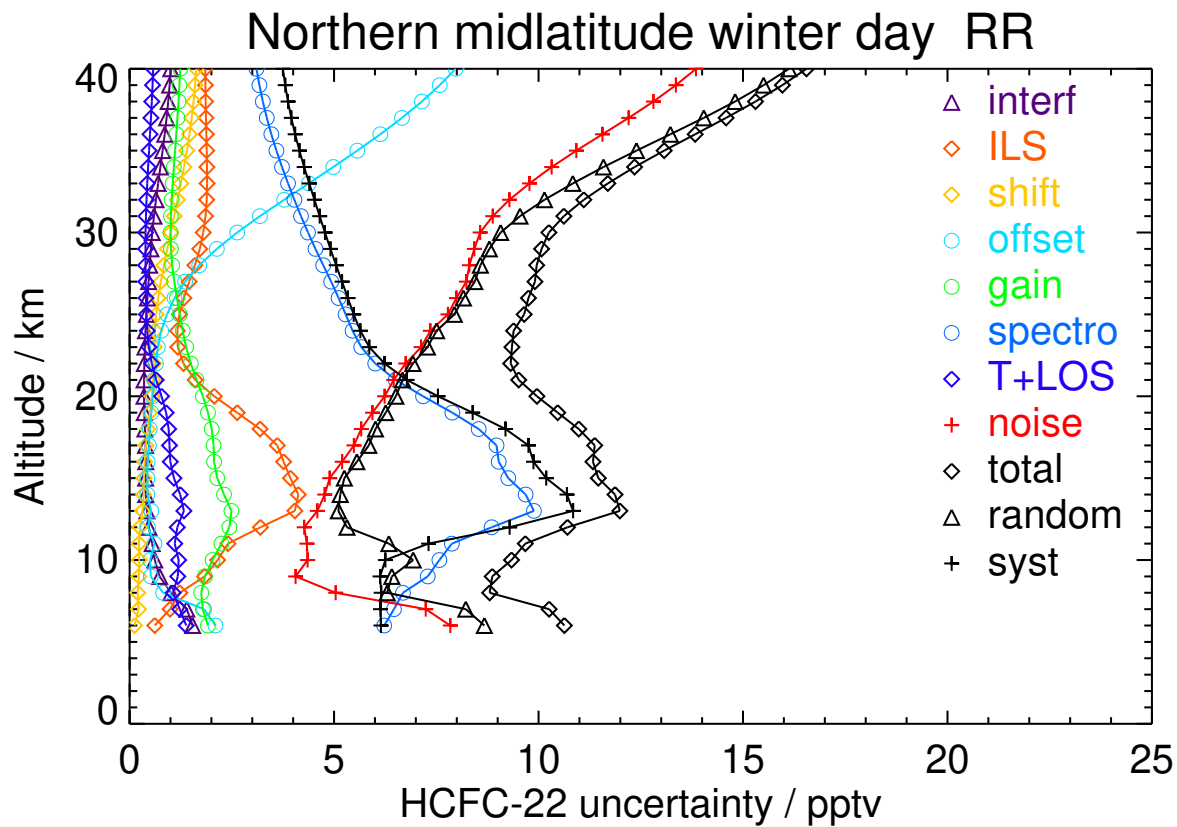

**Figure S43.** V8R\_F-22\_261 Northern midlatitude winter day

**Table S45.** HCFC-22 error budget for Northern midlatitude winter night. All uncertainties are  $1\sigma$ .

| altitude<br>(km) | mean target<br>(pptv) | interf<br>(pptv) | ILS<br>(pptv) | shift<br>(pptv) | offset<br>(pptv) | gain<br>(pptv) | spectro<br>(pptv) | T+LOS<br>(pptv) | noise<br>(pptv) | random<br>(pptv) | syst<br>(pptv) | total<br>(pptv) |
|------------------|-----------------------|------------------|---------------|-----------------|------------------|----------------|-------------------|-----------------|-----------------|------------------|----------------|-----------------|
| 8                | 202.04                | 0.99             | 1.37          | 0.19            | 0.77             | 1.84           | 7.13              | 1.07            | 4.80            | 6.39             | 6.40           | 9.05            |
| 11               | 190.25                | 0.56             | 2.13          | 0.22            | 0.52             | 2.29           | 7.72              | 1.06            | 4.30            | 6.44             | 6.95           | 9.47            |
| 14               | 176.96                | 0.39             | 3.92          | 0.34            | 0.43             | 2.36           | 9.45              | 1.15            | 4.77            | 5.34             | 10.31          | 11.61           |
| 17               | 160.83                | 0.39             | 3.63          | 0.36            | 0.46             | 2.02           | 9.17              | 0.97            | 5.49            | 5.80             | 9.96           | 11.53           |
| 20               | 139.00                | 0.35             | 2.21          | 0.51            | 0.57             | 1.76           | 7.61              | 0.80            | 6.26            | 6.60             | 7.93           | 10.32           |
| 23               | 130.12                | 0.37             | 1.27          | 0.56            | 0.71             | 1.46           | 5.95              | 0.49            | 7.16            | 7.34             | 6.15           | 9.57            |
| 26               | 123.15                | 0.43             | 1.38          | 0.64            | 1.12             | 1.16           | 5.19              | 0.41            | 8.11            | 8.26             | 5.45           | 9.89            |
| 29               | 112.21                | 0.51             | 1.80          | 0.88            | 2.09             | 0.98           | 4.45              | 0.41            | 8.51            | 8.85             | 4.87           | 10.10           |
| 32               | 101.87                | 0.65             | 1.98          | 1.21            | 3.64             | 0.96           | 3.79              | 0.46            | 9.22            | 10.03            | 4.34           | 10.93           |
| 35               | 93.88                 | 0.83             | 1.95          | 1.51            | 5.37             | 1.00           | 3.29              | 0.54            | 10.67           | 12.10            | 3.90           | 12.71           |
| 38               | 88.18                 | 0.98             | 1.91          | 1.72            | 6.94             | 1.06           | 2.97              | 0.62            | 12.51           | 14.47            | 3.62           | 14.92           |
| 41               | 84.43                 | 1.09             | 1.89          | 1.84            | 8.13             | 1.11           | 2.77              | 0.68            | 14.03           | 16.38            | 3.47           | 16.74           |

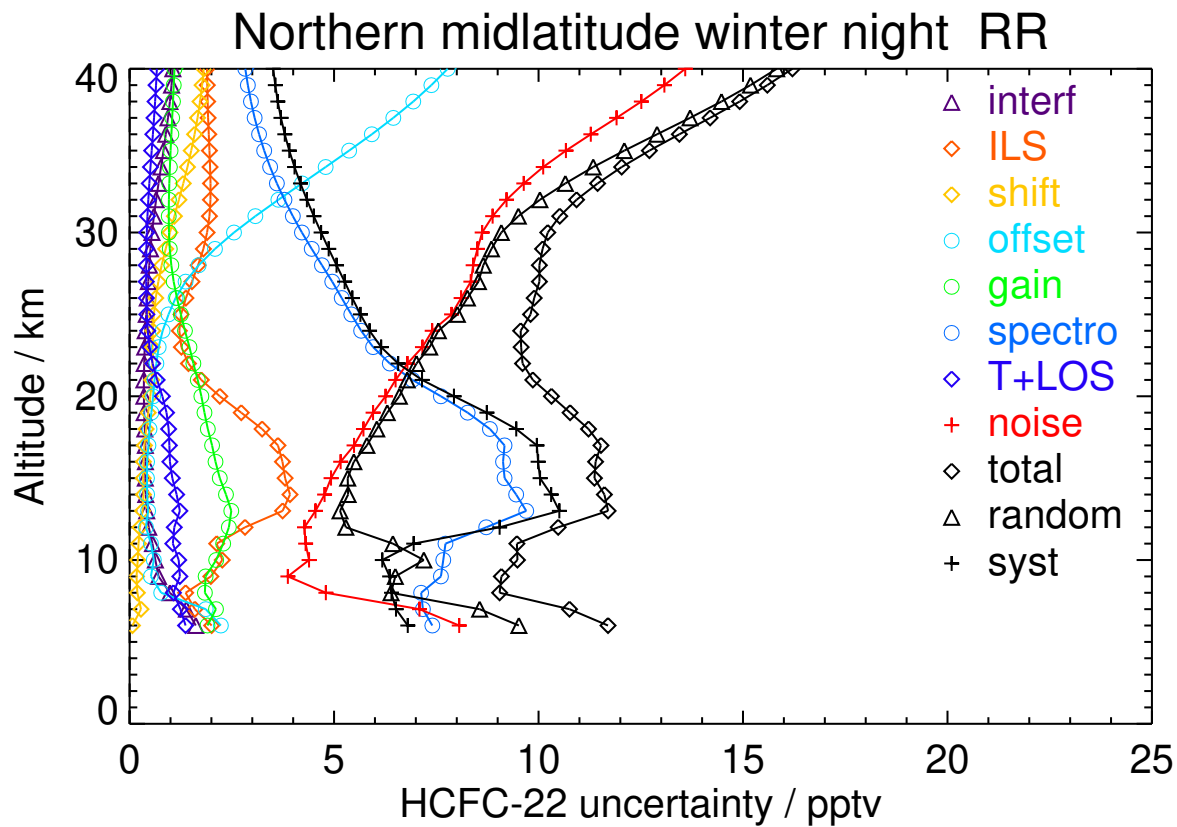

**Figure S44.** V8R\_F-22\_261 Northern midlatitude winter night

**Table S46.** HCFC-22 error budget for Northern midlatitude spring day. All uncertainties are  $1\sigma$ .

| altitude<br>(km) | mean target<br>(pptv) | interf<br>(pptv) | ILS<br>(pptv) | shift<br>(pptv) | offset<br>(pptv) | gain<br>(pptv) | spectro<br>(pptv) | T+LOS<br>(pptv) | noise<br>(pptv) | random<br>(pptv) | syst<br>(pptv) | total<br>(pptv) |
|------------------|-----------------------|------------------|---------------|-----------------|------------------|----------------|-------------------|-----------------|-----------------|------------------|----------------|-----------------|
| 8                | 195.60                | 1.34             | 1.71          | 0.25            | 1.65             | 1.48           | 6.62              | 1.22            | 7.47            | 8.55             | 6.13           | 10.52           |
| 11               | 188.40                | 0.56             | 2.07          | 0.40            | 0.57             | 1.92           | 7.70              | 1.15            | 4.30            | 7.10             | 6.12           | 9.38            |
| 14               | 179.93                | 0.41             | 3.85          | 0.34            | 0.45             | 2.30           | 9.49              | 1.22            | 4.74            | 5.27             | 10.33          | 11.60           |
| 17               | 166.36                | 0.39             | 3.66          | 0.36            | 0.48             | 2.16           | 9.62              | 1.09            | 5.50            | 5.83             | 10.42          | 11.94           |
| 20               | 138.97                | 0.35             | 2.33          | 0.50            | 0.62             | 2.22           | 8.14              | 0.89            | 6.31            | 6.70             | 8.56           | 10.87           |
| 23               | 122.90                | 0.36             | 1.45          | 0.52            | 0.77             | 1.73           | 6.12              | 0.52            | 7.24            | 7.49             | 6.33           | 9.81            |
| 26               | 115.79                | 0.44             | 1.22          | 0.62            | 1.24             | 1.13           | 5.09              | 0.40            | 8.30            | 8.50             | 5.26           | 9.99            |
| 29               | 107.07                | 0.51             | 1.52          | 0.86            | 2.28             | 0.94           | 4.33              | 0.38            | 8.71            | 9.10             | 4.61           | 10.20           |
| 32               | 94.74                 | 0.64             | 1.76          | 1.17            | 3.87             | 0.94           | 3.66              | 0.43            | 9.61            | 10.49            | 4.08           | 11.25           |
| 35               | 83.87                 | 0.82             | 1.81          | 1.46            | 5.55             | 0.98           | 3.15              | 0.53            | 11.13           | 12.59            | 3.65           | 13.11           |
| 38               | 75.39                 | 0.98             | 1.81          | 1.68            | 7.04             | 1.04           | 2.80              | 0.62            | 12.93           | 14.89            | 3.36           | 15.27           |
| 41               | 69.70                 | 1.09             | 1.81          | 1.82            | 8.18             | 1.10           | 2.58              | 0.69            | 14.38           | 16.72            | 3.20           | 17.02           |

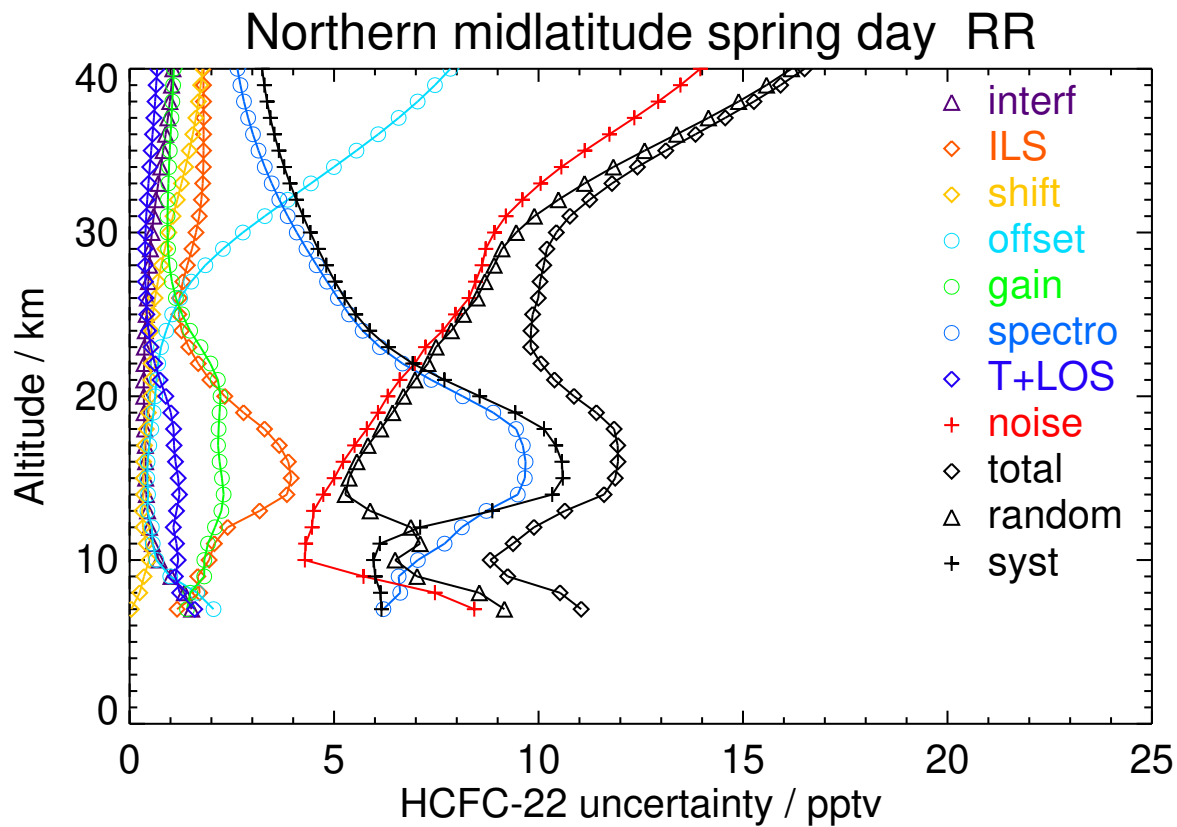

**Figure S45.** V8R\_F-22\_261 Northern midlatitude spring day

**Table S47.** HCFC-22 error budget for Northern midlatitude spring night. All uncertainties are  $1\sigma$ .

| altitude<br>(km) | mean target<br>(pptv) | interf<br>(pptv) | ILS<br>(pptv) | shift<br>(pptv) | offset<br>(pptv) | gain<br>(pptv) | spectro<br>(pptv) | T+LOS<br>(pptv) | noise<br>(pptv) | random<br>(pptv) | syst<br>(pptv) | total<br>(pptv) |
|------------------|-----------------------|------------------|---------------|-----------------|------------------|----------------|-------------------|-----------------|-----------------|------------------|----------------|-----------------|
| 8                | 194.26                | 1.28             | 1.51          | 0.10            | 1.78             | 1.70           | 6.70              | 1.21            | 7.43            | 8.72             | 5.96           | 10.56           |
| 11               | 189.20                | 0.56             | 1.52          | 0.50            | 0.64             | 1.93           | 6.73              | 0.93            | 4.33            | 5.80             | 6.18           | 8.48            |
| 14               | 178.02                | 0.39             | 4.20          | 0.35            | 0.46             | 2.43           | 10.02             | 1.32            | 4.72            | 5.26             | 10.99          | 12.18           |
| 17               | 156.66                | 0.38             | 3.45          | 0.39            | 0.46             | 1.92           | 9.17              | 1.06            | 5.44            | 5.71             | 9.92           | 11.44           |
| 20               | 137.40                | 0.35             | 1.91          | 0.55            | 0.62             | 2.04           | 7.44              | 0.77            | 6.27            | 6.56             | 7.81           | 10.20           |
| 23               | 123.42                | 0.37             | 1.48          | 0.54            | 0.75             | 2.31           | 5.96              | 0.48            | 7.22            | 7.49             | 6.34           | 9.82            |
| 26               | 115.91                | 0.43             | 1.36          | 0.62            | 1.22             | 1.57           | 4.98              | 0.39            | 8.26            | 8.46             | 5.30           | 9.98            |
| 29               | 106.74                | 0.50             | 1.57          | 0.85            | 2.29             | 1.07           | 4.17              | 0.38            | 8.73            | 9.11             | 4.52           | 10.18           |
| 32               | 95.97                 | 0.64             | 1.72          | 1.15            | 3.87             | 0.95           | 3.48              | 0.43            | 9.60            | 10.47            | 3.93           | 11.18           |
| 35               | 85.98                 | 0.82             | 1.71          | 1.45            | 5.55             | 0.96           | 3.00              | 0.54            | 11.12           | 12.57            | 3.50           | 13.05           |
| 38               | 78.96                 | 0.98             | 1.68          | 1.69            | 7.04             | 1.01           | 2.70              | 0.65            | 12.90           | 14.87            | 3.24           | 15.21           |
| 41               | 74.55                 | 1.09             | 1.67          | 1.83            | 8.18             | 1.05           | 2.53              | 0.73            | 14.35           | 16.69            | 3.10           | 16.98           |

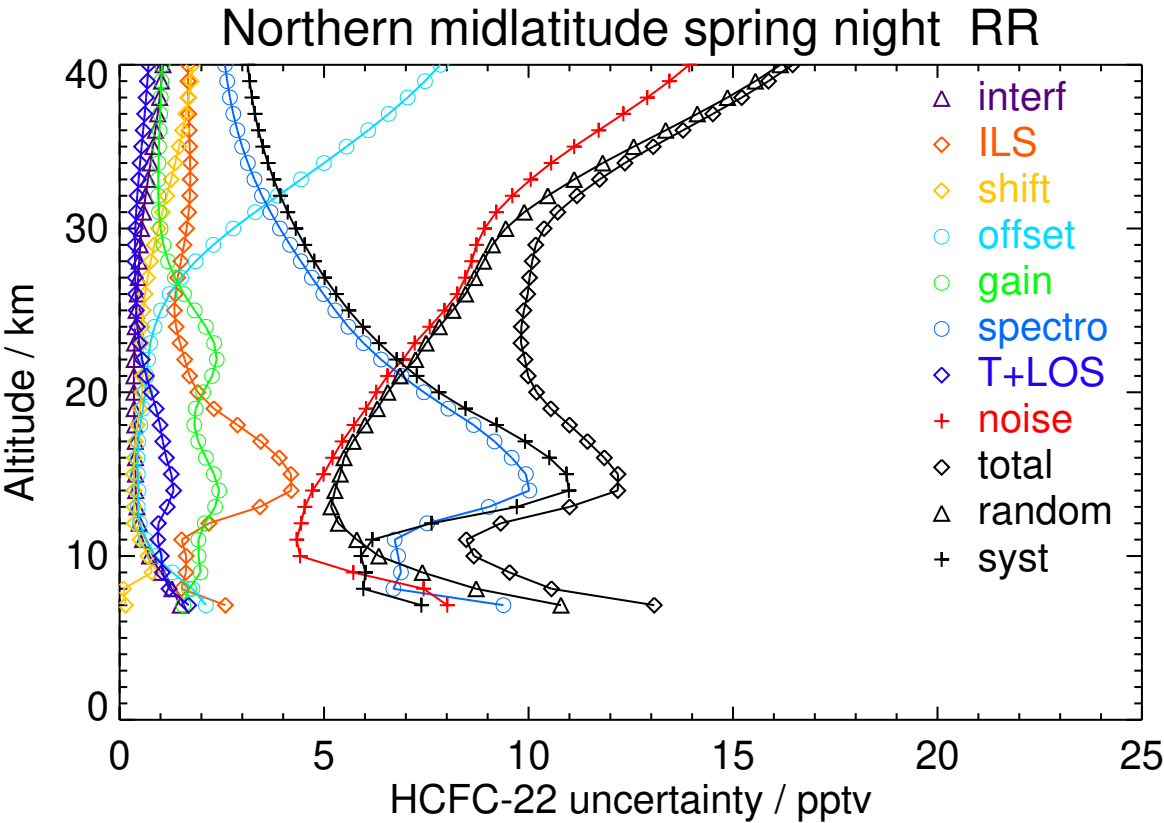

**Figure S46.** V8R\_F-22\_261 Northern midlatitude spring night



**Table S48.** HCFC-22 error budget for Northern midlatitude summer day. All uncertainties are  $1\sigma$ .

| altitude<br>(km) | mean target<br>(pptv) | interf<br>(pptv) | ILS<br>(pptv) | shift<br>(pptv) | offset<br>(pptv) | gain<br>(pptv) | spectro<br>(pptv) | T+LOS<br>(pptv) | noise<br>(pptv) | random<br>(pptv) | syst<br>(pptv) | total<br>(pptv) |
|------------------|-----------------------|------------------|---------------|-----------------|------------------|----------------|-------------------|-----------------|-----------------|------------------|----------------|-----------------|
| 8                | 202.45                | 1.65             | 1.92          | 0.16            | 1.73             | 1.64           | 7.01              | 1.13            | 8.08            | 9.51             | 6.12           | 11.31           |
| 11               | 205.53                | 0.75             | 3.73          | 0.25            | 0.51             | 1.25           | 11.35             | 2.23            | 4.07            | 6.66             | 11.06          | 12.91           |
| 14               | 212.33                | 0.56             | 2.62          | 0.26            | 0.46             | 2.90           | 8.92              | 1.01            | 4.81            | 5.74             | 9.31           | 10.94           |
| 17               | 194.55                | 0.41             | 3.68          | 0.24            | 0.56             | 2.82           | 10.82             | 1.35            | 5.79            | 6.12             | 11.70          | 13.20           |
| 20               | 160.10                | 0.34             | 2.94          | 0.39            | 0.64             | 2.23           | 9.92              | 1.21            | 6.34            | 6.58             | 10.54          | 12.43           |
| 23               | 134.29                | 0.36             | 1.91          | 0.56            | 0.68             | 1.73           | 7.45              | 0.76            | 7.08            | 7.26             | 7.81           | 10.67           |
| 26               | 121.83                | 0.42             | 1.54          | 0.71            | 0.93             | 1.10           | 5.63              | 0.51            | 7.95            | 8.08             | 5.91           | 10.01           |
| 29               | 114.39                | 0.50             | 1.63          | 0.96            | 1.74             | 0.86           | 4.50              | 0.42            | 8.38            | 8.65             | 4.85           | 9.91            |
| 32               | 105.75                | 0.62             | 1.68          | 1.25            | 3.14             | 0.89           | 3.81              | 0.42            | 9.00            | 9.65             | 4.24           | 10.54           |
| 35               | 97.53                 | 0.79             | 1.67          | 1.53            | 4.75             | 1.01           | 3.35              | 0.50            | 10.29           | 11.49            | 3.85           | 12.12           |
| 38               | 91.57                 | 0.95             | 1.66          | 1.76            | 6.28             | 1.13           | 3.04              | 0.59            | 12.07           | 13.78            | 3.60           | 14.24           |
| 41               | 87.56                 | 1.07             | 1.66          | 1.91            | 7.48             | 1.22           | 2.85              | 0.66            | 13.64           | 15.74            | 3.46           | 16.11           |

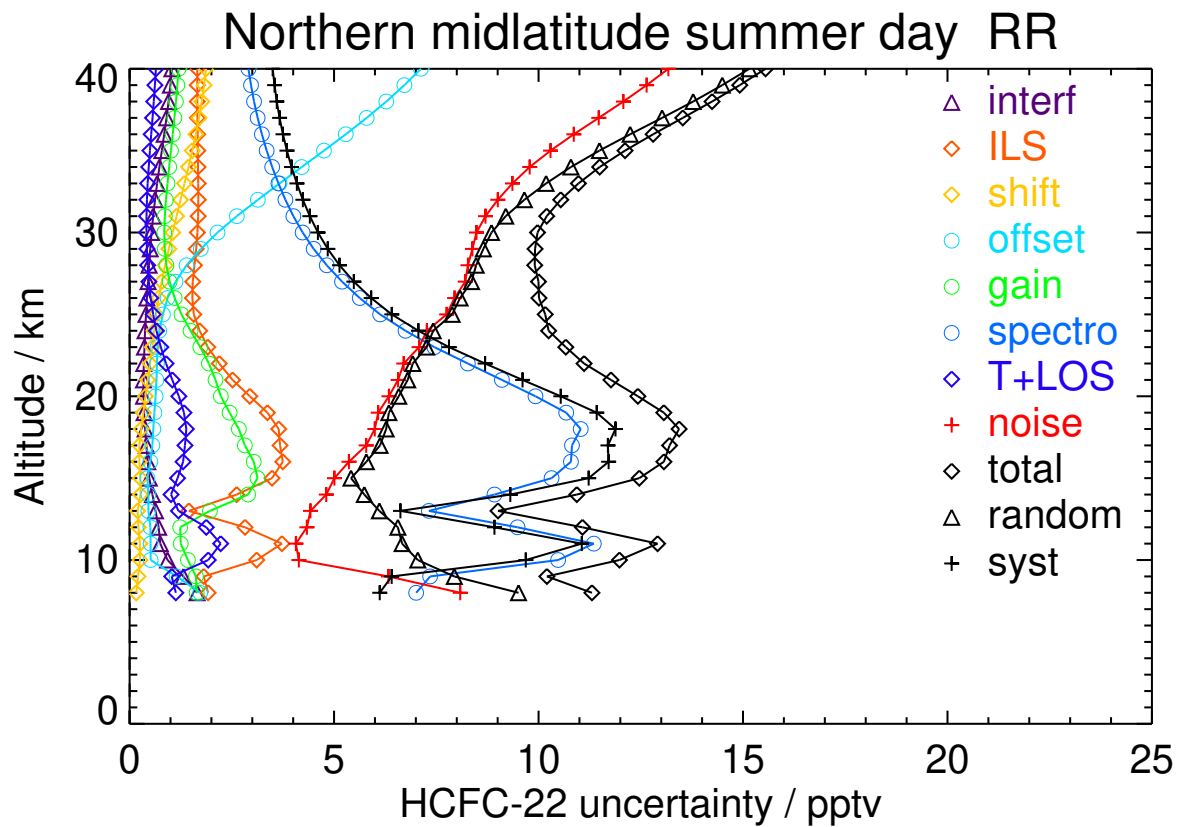

**Figure S47.** V8R\_F-22\_261 Northern midlatitude summer day

**Table S49.** HCFC-22 error budget for Northern midlatitude summer night. All uncertainties are  $1\sigma$ .

| altitude<br>(km) | mean target<br>(pptv) | interf<br>(pptv) | ILS<br>(pptv) | shift<br>(pptv) | offset<br>(pptv) | gain<br>(pptv) | spectro<br>(pptv) | T+LOS<br>(pptv) | noise<br>(pptv) | random<br>(pptv) | syst<br>(pptv) | total<br>(pptv) |
|------------------|-----------------------|------------------|---------------|-----------------|------------------|----------------|-------------------|-----------------|-----------------|------------------|----------------|-----------------|
| 8                | 210.95                | 1.60             | 1.00          | 0.25            | 1.85             | 2.17           | 6.34              | 0.95            | 7.69            | 8.30             | 6.55           | 10.58           |
| 11               | 206.33                | 0.91             | 4.97          | 0.31            | 0.69             | 0.88           | 13.54             | 2.57            | 4.47            | 8.26             | 12.98          | 15.39           |
| 14               | 206.40                | 0.60             | 1.67          | 0.20            | 0.43             | 2.12           | 7.32              | 1.17            | 4.92            | 6.70             | 6.49           | 9.33            |
| 17               | 189.57                | 0.41             | 4.03          | 0.27            | 0.51             | 2.64           | 11.27             | 1.49            | 5.70            | 6.12             | 12.16          | 13.62           |
| 20               | 159.97                | 0.34             | 2.95          | 0.39            | 0.56             | 2.11           | 9.90              | 1.16            | 6.36            | 6.59             | 10.49          | 12.39           |
| 23               | 136.58                | 0.36             | 1.84          | 0.52            | 0.74             | 1.76           | 7.78              | 0.75            | 7.16            | 7.36             | 8.10           | 10.94           |
| 26               | 122.39                | 0.42             | 1.48          | 0.67            | 0.93             | 1.13           | 5.84              | 0.52            | 8.09            | 8.22             | 6.10           | 10.24           |
| 29               | 113.53                | 0.50             | 1.58          | 0.93            | 1.72             | 0.85           | 4.53              | 0.43            | 8.48            | 8.74             | 4.85           | 9.99            |
| 32               | 106.67                | 0.63             | 1.62          | 1.24            | 3.09             | 0.85           | 3.76              | 0.45            | 9.12            | 9.76             | 4.15           | 10.60           |
| 35               | 101.42                | 0.80             | 1.54          | 1.55            | 4.68             | 0.93           | 3.32              | 0.54            | 10.40           | 11.56            | 3.72           | 12.15           |
| 38               | 97.94                 | 0.97             | 1.45          | 1.79            | 6.18             | 1.02           | 3.07              | 0.64            | 12.16           | 13.83            | 3.48           | 14.26           |
| 41               | 95.55                 | 1.08             | 1.41          | 1.94            | 7.37             | 1.09           | 2.93              | 0.73            | 13.72           | 15.77            | 3.36           | 16.12           |

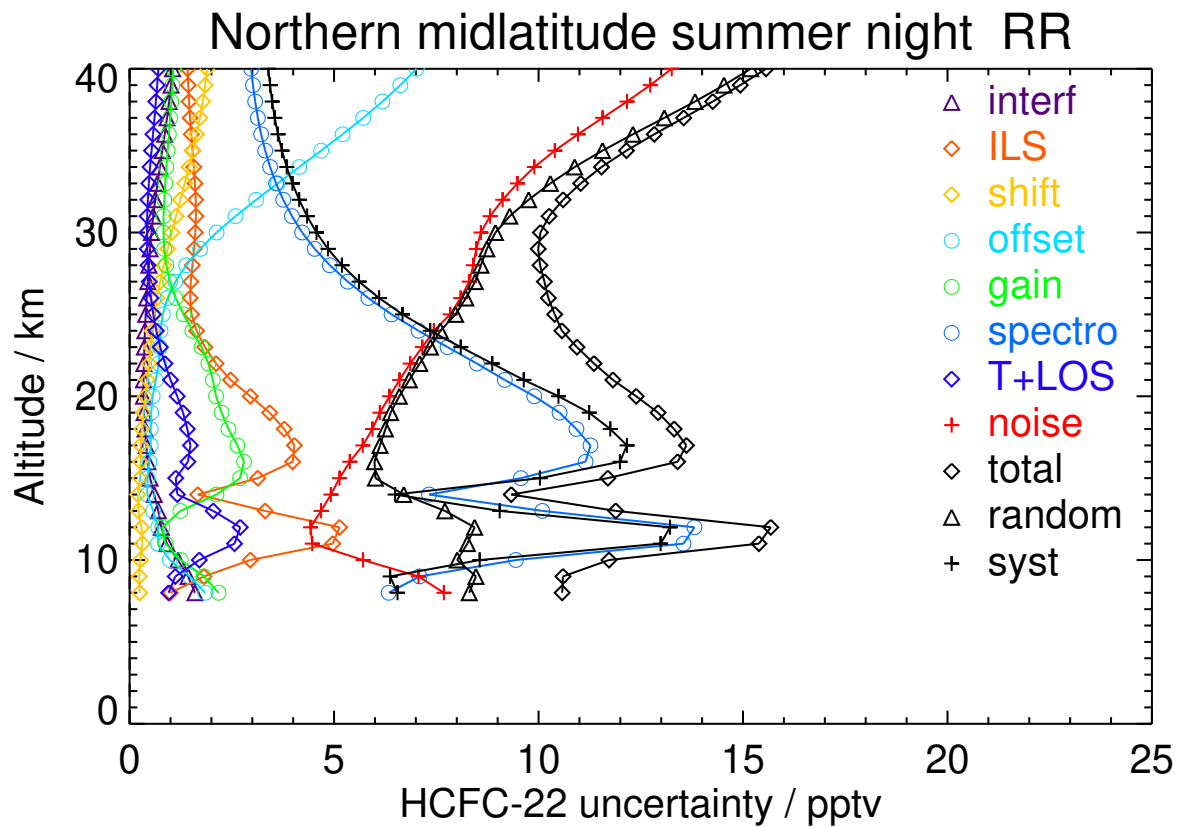

**Figure S48.** V8R\_F-22\_261 Northern midlatitude summer night

**Table S50.** HCFC-22 error budget for Northern midlatitude autumn day. All uncertainties are  $1\sigma$ .

| altitude<br>(km) | mean target<br>(pptv) | interf<br>(pptv) | ILS<br>(pptv) | shift<br>(pptv) | offset<br>(pptv) | gain<br>(pptv) | spectro<br>(pptv) | T+LOS<br>(pptv) | noise<br>(pptv) | random<br>(pptv) | syst<br>(pptv) | total<br>(pptv) |
|------------------|-----------------------|------------------|---------------|-----------------|------------------|----------------|-------------------|-----------------|-----------------|------------------|----------------|-----------------|
| 8                | 202.92                | 1.60             | 1.23          | 0.27            | 1.78             | 1.77           | 6.63              | 0.96            | 8.07            | 8.87             | 6.46           | 10.98           |
| 11               | 209.55                | 0.77             | 3.54          | 0.30            | 0.58             | 1.06           | 11.26             | 2.27            | 4.20            | 7.56             | 10.34          | 12.82           |
| 14               | 210.45                | 0.56             | 2.53          | 0.27            | 0.50             | 2.54           | 8.81              | 1.01            | 4.91            | 5.57             | 9.22           | 10.78           |
| 17               | 190.00                | 0.41             | 3.98          | 0.32            | 0.56             | 2.64           | 11.24             | 1.44            | 5.70            | 6.02             | 12.17          | 13.58           |
| 20               | 158.09                | 0.34             | 2.84          | 0.40            | 0.63             | 2.13           | 9.69              | 1.16            | 6.40            | 6.67             | 10.25          | 12.23           |
| 23               | 133.51                | 0.36             | 1.92          | 0.46            | 0.73             | 1.90           | 7.48              | 0.72            | 7.27            | 7.49             | 7.83           | 10.83           |
| 26               | 122.54                | 0.43             | 1.64          | 0.62            | 1.20             | 1.41           | 5.80              | 0.49            | 8.13            | 8.32             | 6.11           | 10.32           |
| 29               | 115.27                | 0.50             | 1.65          | 0.82            | 2.35             | 1.06           | 4.75              | 0.39            | 8.70            | 9.09             | 5.09           | 10.42           |
| 32               | 108.39                | 0.63             | 1.66          | 1.05            | 4.03             | 1.00           | 4.09              | 0.40            | 9.73            | 10.63            | 4.49           | 11.54           |
| 35               | 101.33                | 0.78             | 1.62          | 1.27            | 5.75             | 1.05           | 3.65              | 0.47            | 11.44           | 12.92            | 4.08           | 13.55           |
| 38               | 95.29                 | 0.92             | 1.59          | 1.44            | 7.23             | 1.11           | 3.34              | 0.56            | 13.27           | 15.24            | 3.79           | 15.70           |
| 41               | 90.80                 | 1.01             | 1.58          | 1.56            | 8.33             | 1.15           | 3.13              | 0.63            | 14.66           | 17.00            | 3.61           | 17.37           |

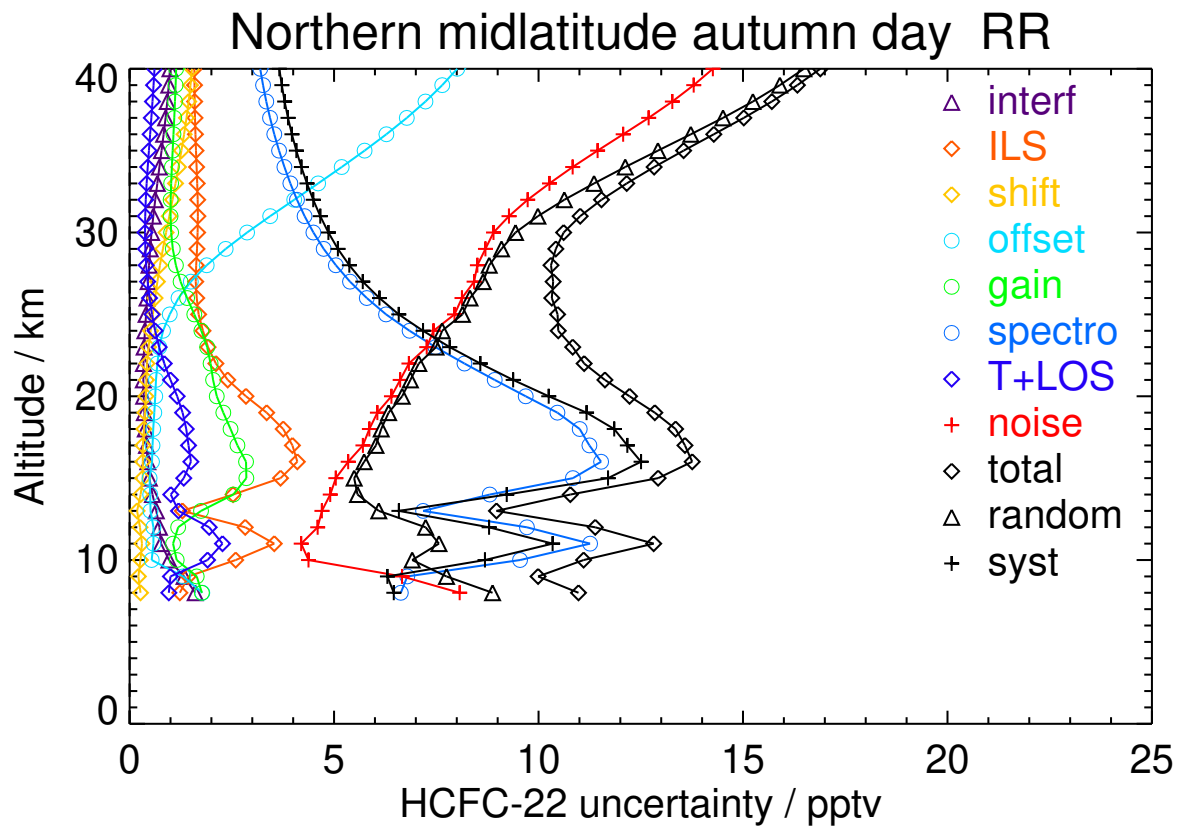

**Figure S49.** V8R\_F-22\_261 Northern midlatitude autumn day

**Table S51.** HCFC-22 error budget for Northern midlatitude autumn night. All uncertainties are  $1\sigma$ .

| altitude<br>(km) | mean target<br>(pptv) | interf<br>(pptv) | ILS<br>(pptv) | shift<br>(pptv) | offset<br>(pptv) | gain<br>(pptv) | spectro<br>(pptv) | T+LOS<br>(pptv) | noise<br>(pptv) | random<br>(pptv) | syst<br>(pptv) | total<br>(pptv) |
|------------------|-----------------------|------------------|---------------|-----------------|------------------|----------------|-------------------|-----------------|-----------------|------------------|----------------|-----------------|
| 8                | 201.24                | 1.56             | 1.77          | 0.29            | 1.78             | 1.80           | 7.38              | 1.20            | 7.74            | 9.40             | 6.30           | 11.31           |
| 11               | 209.82                | 0.77             | 3.06          | 0.34            | 0.61             | 1.23           | 10.77             | 2.06            | 4.41            | 7.25             | 9.95           | 12.32           |
| 14               | 205.04                | 0.53             | 2.97          | 0.28            | 0.48             | 2.62           | 9.17              | 1.14            | 4.95            | 5.73             | 9.66           | 11.23           |
| 17               | 183.24                | 0.40             | 3.88          | 0.33            | 0.53             | 2.52           | 10.85             | 1.35            | 5.63            | 6.01             | 11.71          | 13.16           |
| 20               | 153.65                | 0.34             | 2.61          | 0.40            | 0.62             | 1.99           | 9.42              | 1.07            | 6.39            | 6.63             | 9.90           | 11.92           |
| 23               | 131.09                | 0.36             | 1.72          | 0.46            | 0.74             | 1.67           | 7.29              | 0.68            | 7.26            | 7.45             | 7.57           | 10.63           |
| 26               | 121.61                | 0.43             | 1.62          | 0.61            | 1.20             | 1.34           | 5.69              | 0.48            | 8.19            | 8.39             | 5.98           | 10.30           |
| 29               | 113.60                | 0.50             | 1.69          | 0.80            | 2.33             | 1.08           | 4.61              | 0.39            | 8.74            | 9.13             | 4.99           | 10.40           |
| 32               | 106.70                | 0.63             | 1.70          | 1.04            | 3.97             | 1.02           | 3.91              | 0.40            | 9.74            | 10.61            | 4.35           | 11.47           |
| 35               | 101.73                | 0.78             | 1.66          | 1.28            | 5.67             | 1.06           | 3.48              | 0.48            | 11.37           | 12.82            | 3.94           | 13.41           |
| 38               | 97.91                 | 0.93             | 1.63          | 1.47            | 7.15             | 1.11           | 3.20              | 0.57            | 13.19           | 15.13            | 3.68           | 15.57           |
| 41               | 95.11                 | 1.03             | 1.62          | 1.59            | 8.26             | 1.15           | 3.03              | 0.64            | 14.60           | 16.91            | 3.53           | 17.28           |

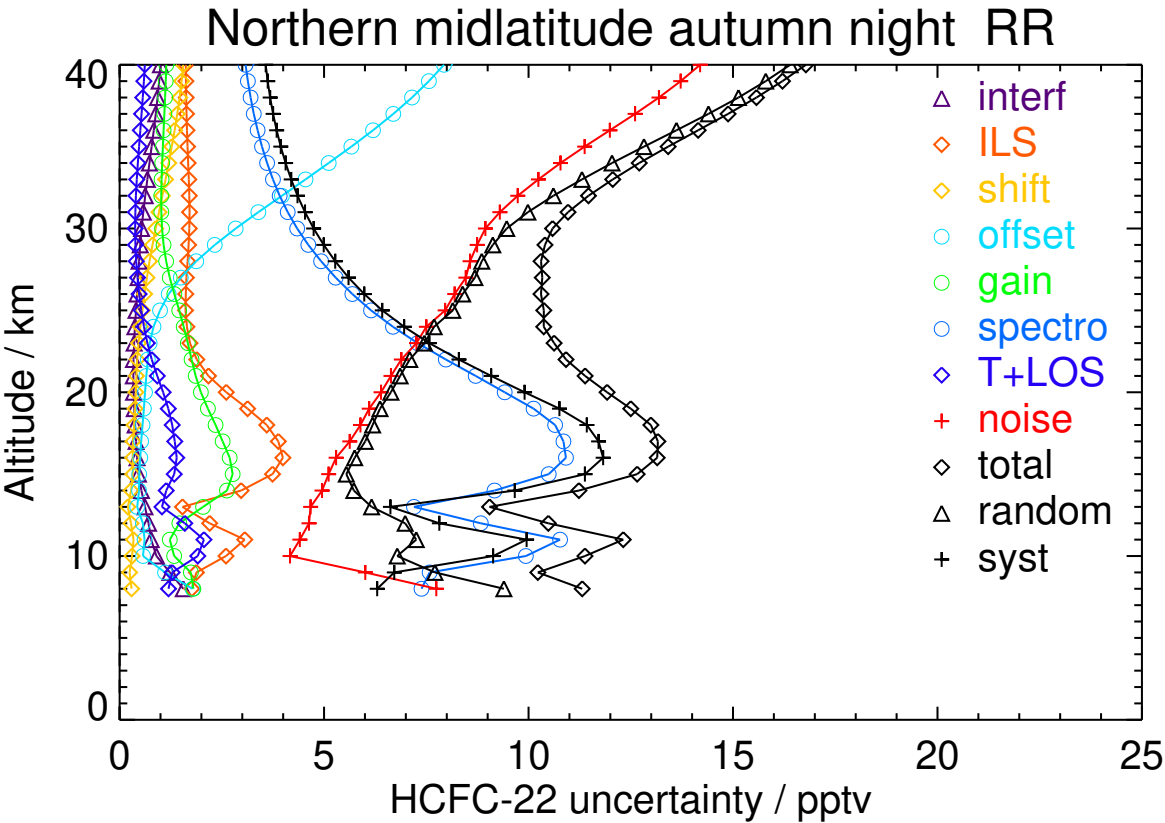

**Figure S50.** V8R\_F-22\_261 Northern midlatitude autumn night

Table S52. HCFC-22 error budget for Tropics day. All uncertainties are  $1\sigma$ .

| altitude<br>(km) | mean target<br>(pptv) | interf<br>(pptv) | ILS<br>(pptv) | shift<br>(pptv) | offset<br>(pptv) | gain<br>(pptv) | spectro<br>(pptv) | T+LOS<br>(pptv) | noise<br>(pptv) | random<br>(pptv) | syst<br>(pptv) | total<br>(pptv) |
|------------------|-----------------------|------------------|---------------|-----------------|------------------|----------------|-------------------|-----------------|-----------------|------------------|----------------|-----------------|
| 11               | 191.96                | 1.10             | 1.95          | 0.15            | 1.15             | 1.43           | 7.93              | 1.69            | 6.35            | 7.93             | 7.18           | 10.70           |
| 14               | 198.68                | 0.60             | 1.33          | 0.21            | 0.52             | 2.02           | 6.68              | 1.27            | 5.00            | 6.25             | 6.22           | 8.82            |
| 17               | 195.16                | 0.44             | 3.23          | 0.21            | 0.66             | 2.38           | 10.28             | 1.65            | 6.20            | 6.67             | 10.91          | 12.79           |
| 20               | 178.49                | 0.36             | 3.00          | 0.33            | 0.70             | 1.85           | 10.00             | 1.35            | 6.77            | 7.04             | 10.55          | 12.68           |
| 23               | 162.51                | 0.36             | 2.27          | 0.47            | 0.74             | 1.58           | 8.57              | 0.92            | 7.26            | 7.45             | 8.94           | 11.64           |
| 26               | 153.18                | 0.43             | 2.28          | 0.70            | 1.04             | 1.29           | 7.30              | 0.68            | 8.03            | 8.24             | 7.68           | 11.26           |
| 29               | 143.44                | 0.52             | 2.48          | 1.03            | 1.92             | 1.09           | 6.16              | 0.58            | 8.53            | 8.89             | 6.66           | 11.10           |
| 32               | 131.23                | 0.64             | 2.37          | 1.36            | 3.37             | 1.14           | 5.21              | 0.55            | 9.13            | 9.89             | 5.78           | 11.46           |
| 35               | 120.28                | 0.82             | 2.10          | 1.67            | 5.01             | 1.25           | 4.51              | 0.61            | 10.45           | 11.77            | 5.08           | 12.82           |
| 38               | 110.91                | 0.98             | 1.88          | 1.90            | 6.54             | 1.34           | 4.03              | 0.69            | 12.12           | 13.97            | 4.59           | 14.70           |
| 41               | 103.82                | 1.09             | 1.77          | 2.04            | 7.76             | 1.41           | 3.72              | 0.76            | 13.59           | 15.85            | 4.29           | 16.42           |

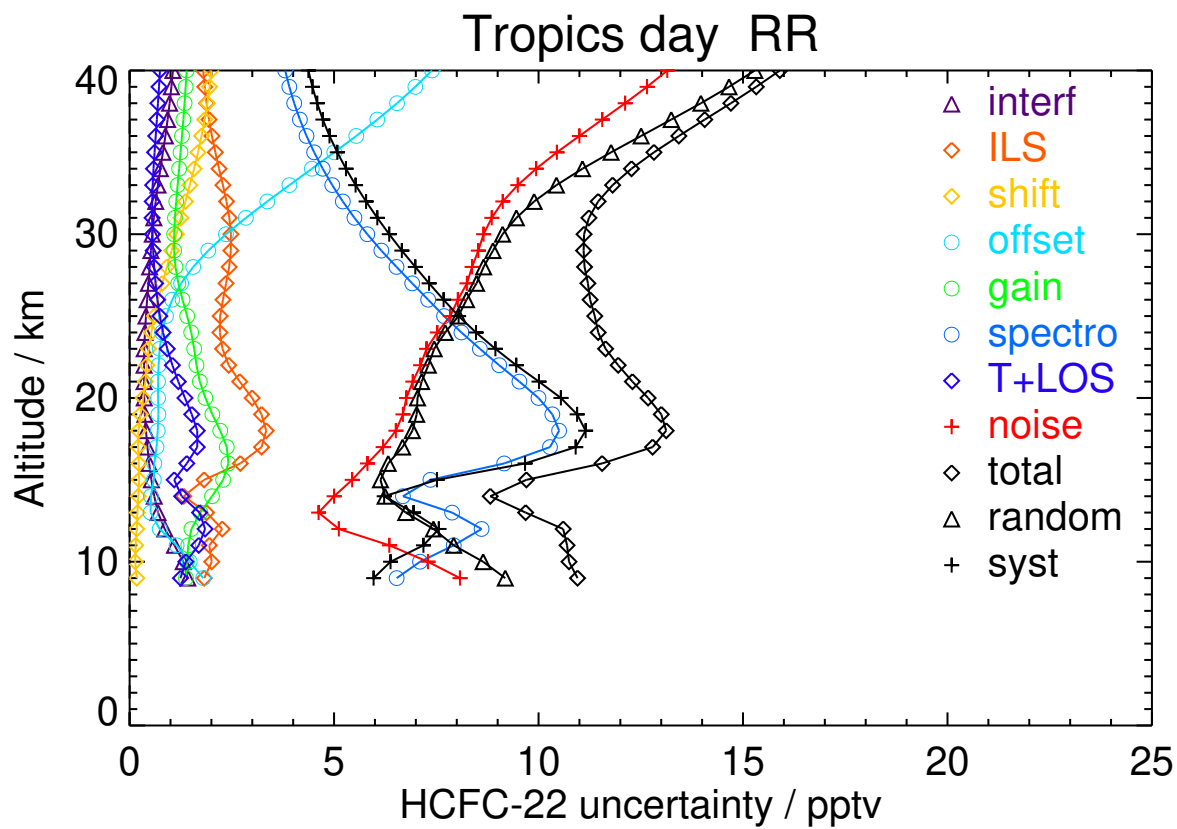

Figure S51. V8R\_F-22\_261 Tropics day

Table S53. HCFC-22 error budget for Tropics night. All uncertainties are  $1\sigma$ .

| altitude<br>(km) | mean target<br>(pptv) | interf<br>(pptv) | ILS<br>(pptv) | shift<br>(pptv) | offset<br>(pptv) | gain<br>(pptv) | spectro<br>(pptv) | T+LOS<br>(pptv) | noise<br>(pptv) | random<br>(pptv) | syst<br>(pptv) | total<br>(pptv) |
|------------------|-----------------------|------------------|---------------|-----------------|------------------|----------------|-------------------|-----------------|-----------------|------------------|----------------|-----------------|
| 11               | 190.04                | 1.14             | 3.08          | 0.18            | 1.10             | 1.18           | 9.54              | 2.20            | 6.41            | 8.72             | 8.61           | 12.26           |
| 14               | 202.58                | 0.63             | 1.18          | 0.17            | 0.53             | 1.76           | 6.53              | 1.54            | 5.17            | 6.00             | 6.40           | 8.77            |
| 17               | 196.29                | 0.44             | 3.24          | 0.19            | 0.65             | 2.59           | 10.53             | 1.80            | 6.39            | 6.91             | 11.19          | 13.15           |
| 20               | 174.03                | 0.36             | 3.02          | 0.27            | 0.68             | 2.01           | 9.97              | 1.44            | 6.98            | 7.26             | 10.56          | 12.81           |
| 23               | 157.99                | 0.36             | 2.22          | 0.44            | 0.68             | 1.54           | 8.33              | 0.97            | 7.45            | 7.64             | 8.70           | 11.57           |
| 26               | 148.27                | 0.44             | 2.12          | 0.69            | 1.00             | 1.22           | 6.99              | 0.69            | 8.17            | 8.35             | 7.35           | 11.13           |
| 29               | 139.97                | 0.53             | 2.23          | 0.99            | 1.90             | 1.08           | 5.90              | 0.56            | 8.67            | 9.00             | 6.35           | 11.02           |
| 32               | 131.18                | 0.66             | 2.13          | 1.31            | 3.35             | 1.14           | 5.03              | 0.54            | 9.39            | 10.11            | 5.54           | 11.53           |
| 35               | 120.42                | 0.83             | 1.88          | 1.58            | 4.97             | 1.26           | 4.39              | 0.60            | 10.79           | 12.04            | 4.90           | 13.00           |
| 38               | 110.81                | 0.98             | 1.68          | 1.79            | 6.47             | 1.37           | 3.93              | 0.68            | 12.44           | 14.20            | 4.45           | 14.88           |
| 41               | 103.74                | 1.09             | 1.59          | 1.92            | 7.66             | 1.45           | 3.64              | 0.75            | 13.88           | 16.03            | 4.18           | 16.57           |

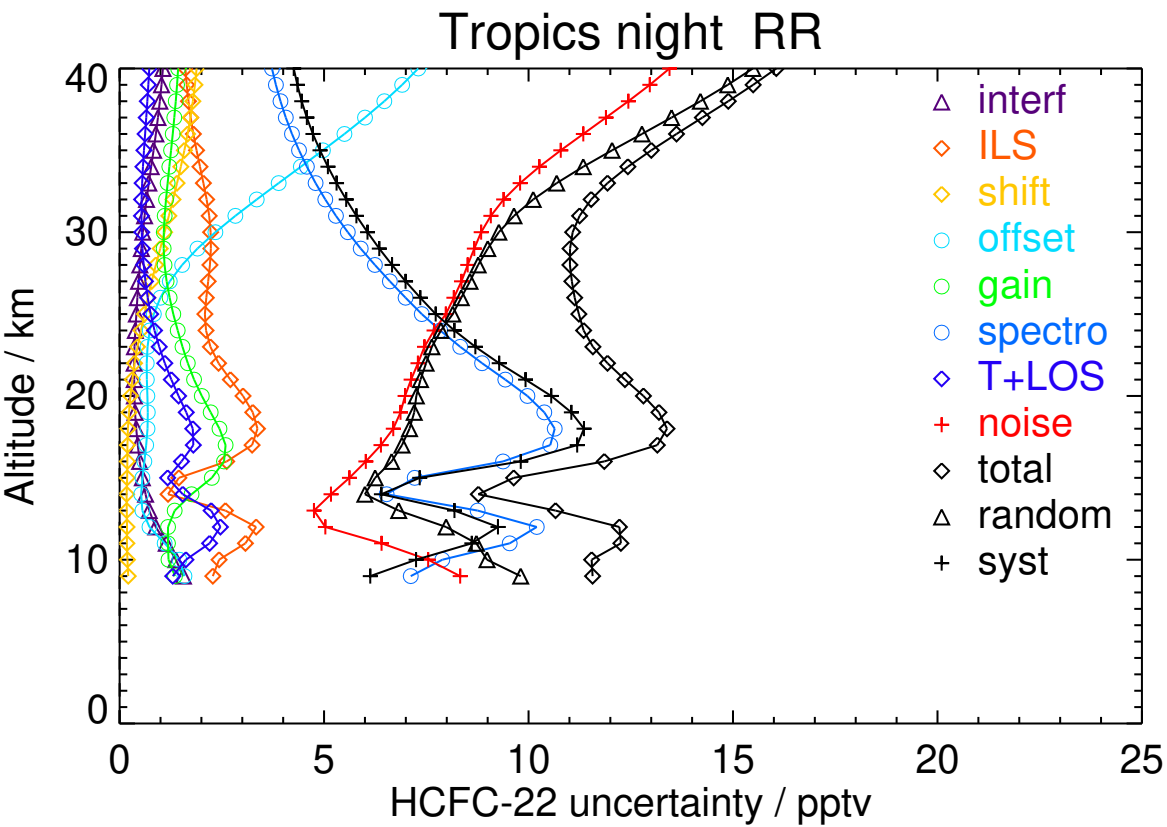

Figure S52. V8R\_F-22\_261 Tropics night

**Table S54.** HCFC-22 error budget for Southern midlatitude winter day. All uncertainties are  $1\sigma$ .

| altitude<br>(km) | mean target<br>(pptv) | interf<br>(pptv) | ILS<br>(pptv) | shift<br>(pptv) | offset<br>(pptv) | gain<br>(pptv) | spectro<br>(pptv) | T+LOS<br>(pptv) | noise<br>(pptv) | random<br>(pptv) | syst<br>(pptv) | total<br>(pptv) |
|------------------|-----------------------|------------------|---------------|-----------------|------------------|----------------|-------------------|-----------------|-----------------|------------------|----------------|-----------------|
| 8                | 187.25                | 0.81             | 1.51          | 0.16            | 0.53             | 1.53           | 7.64              | 1.33            | 4.07            | 6.44             | 6.40           | 9.08            |
| 11               | 188.38                | 0.51             | 2.13          | 0.26            | 0.48             | 2.73           | 7.97              | 1.08            | 4.34            | 6.38             | 7.44           | 9.80            |
| 14               | 173.87                | 0.39             | 3.44          | 0.34            | 0.46             | 2.50           | 9.79              | 1.21            | 4.90            | 5.29             | 10.58          | 11.82           |
| 17               | 154.27                | 0.39             | 2.87          | 0.35            | 0.50             | 2.13           | 9.09              | 0.98            | 5.76            | 5.98             | 9.71           | 11.41           |
| 20               | 134.16                | 0.35             | 1.72          | 0.41            | 0.63             | 1.84           | 7.57              | 0.79            | 6.71            | 6.92             | 7.87           | 10.48           |
| 23               | 123.88                | 0.37             | 1.08          | 0.38            | 1.09             | 1.53           | 6.06              | 0.50            | 7.81            | 7.99             | 6.25           | 10.15           |
| 26               | 117.05                | 0.45             | 1.06          | 0.39            | 2.33             | 1.32           | 5.25              | 0.39            | 9.07            | 9.42             | 5.45           | 10.89           |
| 29               | 105.36                | 0.55             | 1.29          | 0.51            | 4.27             | 1.27           | 4.53              | 0.37            | 10.43           | 11.33            | 4.82           | 12.31           |
| 32               | 96.32                 | 0.71             | 1.48          | 0.70            | 6.35             | 1.27           | 3.91              | 0.44            | 12.43           | 14.02            | 4.30           | 14.66           |
| 35               | 89.26                 | 0.86             | 1.61          | 0.88            | 8.08             | 1.30           | 3.47              | 0.54            | 14.30           | 16.50            | 3.95           | 16.97           |
| 38               | 85.64                 | 0.99             | 1.72          | 1.05            | 9.34             | 1.35           | 3.20              | 0.64            | 15.77           | 18.42            | 3.77           | 18.80           |
| 41               | 84.58                 | 1.09             | 1.68          | 1.34            | 9.67             | 1.40           | 2.89              | 0.73            | 16.19           | 18.97            | 3.53           | 19.30           |

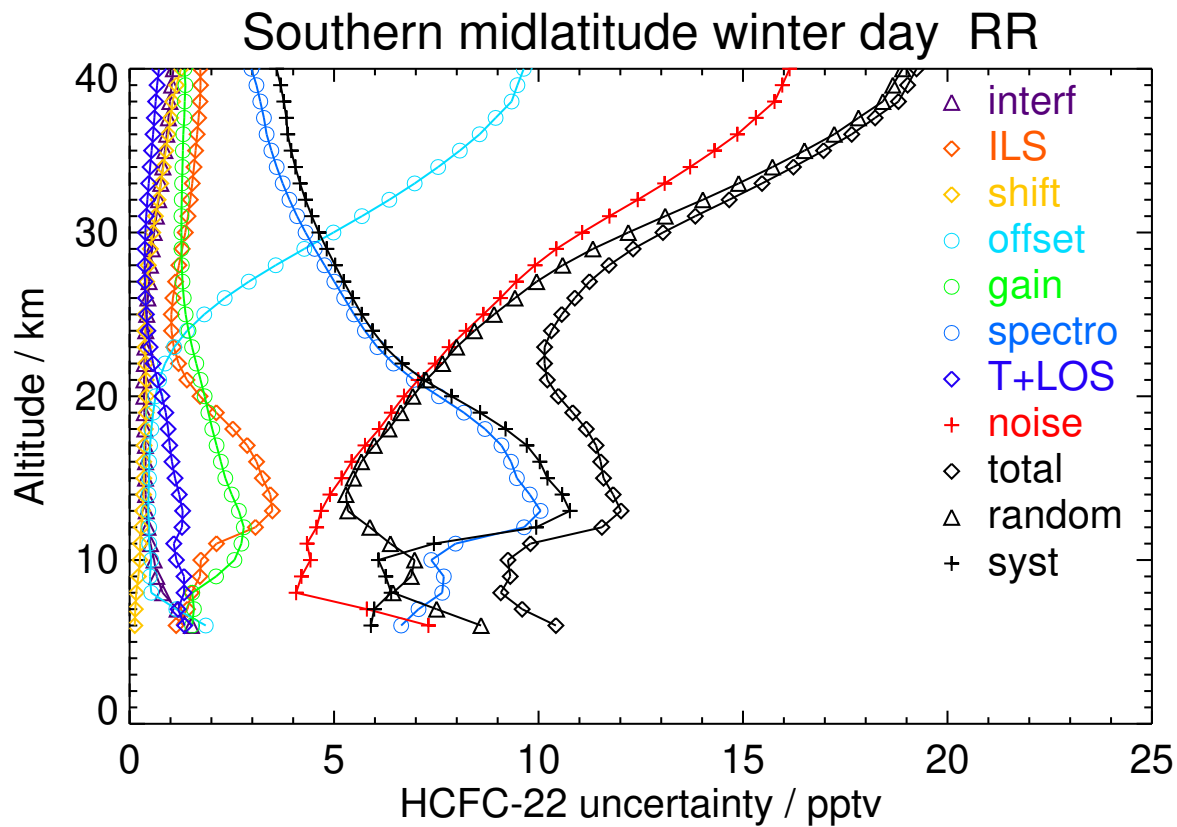

**Figure S53.** V8R\_F-22\_261 Southern midlatitude winter day

**Table S55.** HCFC-22 error budget for Southern midlatitude winter night. All uncertainties are  $1\sigma$ .

| altitude<br>(km) | mean target<br>(pptv) | interf<br>(pptv) | ILS<br>(pptv) | shift<br>(pptv) | offset<br>(pptv) | gain<br>(pptv) | spectro<br>(pptv) | T+LOS<br>(pptv) | noise<br>(pptv) | random<br>(pptv) | syst<br>(pptv) | total<br>(pptv) |
|------------------|-----------------------|------------------|---------------|-----------------|------------------|----------------|-------------------|-----------------|-----------------|------------------|----------------|-----------------|
| 8                | 190.04                | 0.88             | 1.54          | 0.17            | 0.55             | 1.15           | 7.43              | 1.38            | 4.26            | 5.83             | 6.79           | 8.95            |
| 11               | 190.34                | 0.55             | 1.89          | 0.25            | 0.57             | 2.00           | 7.93              | 1.15            | 4.33            | 7.25             | 6.22           | 9.55            |
| 14               | 176.82                | 0.40             | 3.58          | 0.34            | 0.46             | 2.39           | 9.72              | 1.25            | 4.89            | 5.38             | 10.48          | 11.78           |
| 17               | 159.04                | 0.39             | 3.15          | 0.38            | 0.50             | 1.96           | 9.21              | 0.99            | 5.73            | 5.98             | 9.86           | 11.53           |
| 20               | 138.58                | 0.35             | 1.86          | 0.41            | 0.63             | 1.56           | 7.66              | 0.82            | 6.69            | 6.87             | 7.97           | 10.52           |
| 23               | 125.30                | 0.37             | 1.07          | 0.38            | 1.05             | 1.26           | 6.20              | 0.54            | 7.84            | 7.98             | 6.37           | 10.21           |
| 26               | 114.46                | 0.45             | 1.03          | 0.40            | 2.23             | 1.15           | 5.29              | 0.39            | 8.95            | 9.27             | 5.47           | 10.77           |
| 29               | 103.33                | 0.55             | 1.27          | 0.53            | 4.15             | 1.12           | 4.55              | 0.35            | 10.28           | 11.14            | 4.80           | 12.13           |
| 32               | 93.10                 | 0.71             | 1.51          | 0.73            | 6.24             | 1.13           | 3.95              | 0.40            | 12.20           | 13.77            | 4.31           | 14.43           |
| 35               | 86.01                 | 0.87             | 1.69          | 0.93            | 7.98             | 1.14           | 3.53              | 0.50            | 14.13           | 16.30            | 3.99           | 16.79           |
| 38               | 80.93                 | 1.00             | 1.82          | 1.09            | 9.30             | 1.14           | 3.24              | 0.59            | 15.66           | 18.31            | 3.79           | 18.69           |
| 41               | 85.09                 | 1.10             | 2.14          | 1.38            | 9.68             | 1.17           | 3.36              | 0.71            | 16.15           | 18.94            | 4.10           | 19.38           |

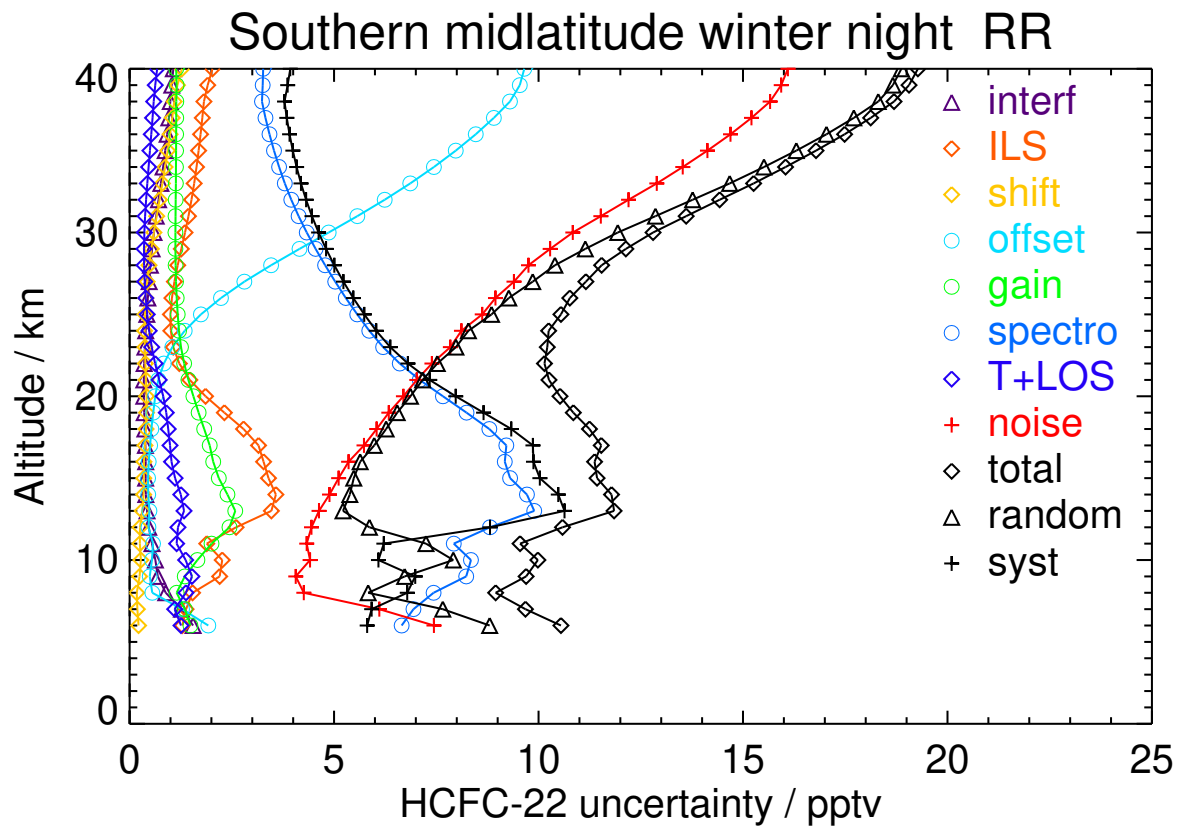

**Figure S54.** V8R\_F-22\_261 Southern midlatitude winter night



**Table S56.** HCFC-22 error budget for Southern midlatitude spring day. All uncertainties are  $1\sigma$ .

| altitude<br>(km) | mean target<br>(pptv) | interf<br>(pptv) | ILS<br>(pptv) | shift<br>(pptv) | offset<br>(pptv) | gain<br>(pptv) | spectro<br>(pptv) | T+LOS<br>(pptv) | noise<br>(pptv) | random<br>(pptv) | syst<br>(pptv) | total<br>(pptv) |
|------------------|-----------------------|------------------|---------------|-----------------|------------------|----------------|-------------------|-----------------|-----------------|------------------|----------------|-----------------|
| 8                | 192.93                | 0.89             | 2.28          | 0.15            | 0.53             | 1.60           | 8.09              | 1.47            | 4.33            | 7.07             | 6.72           | 9.76            |
| 11               | 188.23                | 0.54             | 2.52          | 0.34            | 0.51             | 2.21           | 8.19              | 1.21            | 4.39            | 7.35             | 6.75           | 9.98            |
| 14               | 173.82                | 0.40             | 4.22          | 0.30            | 0.43             | 2.28           | 9.58              | 1.28            | 4.91            | 5.57             | 10.48          | 11.87           |
| 17               | 151.77                | 0.39             | 3.72          | 0.38            | 0.45             | 1.92           | 8.88              | 1.00            | 5.53            | 5.90             | 9.67           | 11.33           |
| 20               | 129.87                | 0.35             | 1.78          | 0.59            | 0.52             | 1.53           | 6.80              | 0.69            | 6.19            | 6.61             | 6.90           | 9.56            |
| 23               | 128.67                | 0.38             | 1.05          | 0.71            | 0.60             | 1.38           | 5.36              | 0.40            | 7.01            | 7.28             | 5.39           | 9.06            |
| 26               | 133.01                | 0.46             | 1.25          | 0.85            | 0.99             | 1.25           | 5.17              | 0.36            | 8.04            | 8.24             | 5.35           | 9.83            |
| 29               | 127.78                | 0.54             | 1.68          | 1.03            | 2.01             | 1.17           | 4.95              | 0.37            | 8.53            | 8.89             | 5.29           | 10.34           |
| 32               | 116.59                | 0.65             | 1.87          | 1.22            | 3.59             | 1.21           | 4.51              | 0.41            | 9.45            | 10.25            | 4.97           | 11.39           |
| 35               | 105.60                | 0.80             | 1.85          | 1.42            | 5.28             | 1.27           | 4.06              | 0.49            | 11.03           | 12.38            | 4.57           | 13.19           |
| 38               | 97.70                 | 0.94             | 1.79          | 1.59            | 6.78             | 1.32           | 3.69              | 0.58            | 12.88           | 14.70            | 4.24           | 15.30           |
| 41               | 92.37                 | 1.04             | 1.77          | 1.71            | 7.91             | 1.35           | 3.43              | 0.66            | 14.35           | 16.54            | 4.02           | 17.02           |

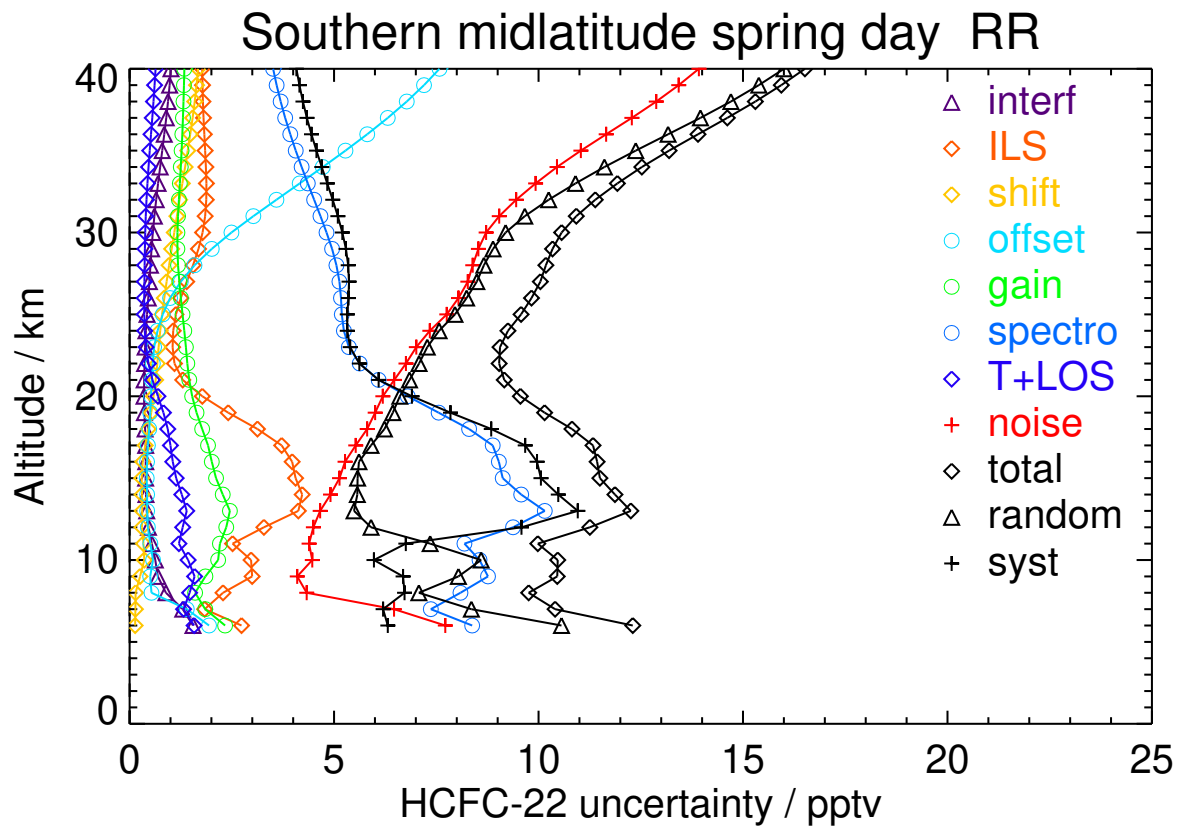

**Figure S55.** V8R\_F-22\_261 Southern midlatitude spring day

**Table S57.** HCFC-22 error budget for Southern midlatitude spring night. All uncertainties are  $1\sigma$ .

| altitude<br>(km) | mean target<br>(pptv) | interf<br>(pptv) | ILS<br>(pptv) | shift<br>(pptv) | offset<br>(pptv) | gain<br>(pptv) | spectro<br>(pptv) | T+LOS<br>(pptv) | noise<br>(pptv) | random<br>(pptv) | syst<br>(pptv) | total<br>(pptv) |
|------------------|-----------------------|------------------|---------------|-----------------|------------------|----------------|-------------------|-----------------|-----------------|------------------|----------------|-----------------|
| 8                | 194.98                | 0.90             | 2.45          | 0.18            | 0.56             | 1.44           | 8.27              | 1.50            | 4.31            | 7.17             | 6.86           | 9.93            |
| 11               | 193.33                | 0.56             | 2.29          | 0.28            | 0.56             | 2.18           | 8.31              | 1.21            | 4.31            | 7.78             | 6.27           | 9.99            |
| 14               | 180.97                | 0.41             | 4.32          | 0.31            | 0.46             | 2.62           | 10.08             | 1.34            | 4.94            | 5.43             | 11.15          | 12.40           |
| 17               | 151.79                | 0.39             | 3.87          | 0.35            | 0.49             | 2.12           | 9.58              | 1.14            | 5.70            | 6.02             | 10.45          | 12.06           |
| 20               | 122.60                | 0.35             | 2.21          | 0.52            | 0.59             | 1.46           | 7.05              | 0.78            | 6.42            | 6.73             | 7.34           | 9.96            |
| 23               | 116.78                | 0.38             | 1.18          | 0.68            | 0.70             | 1.15           | 5.02              | 0.43            | 7.22            | 7.43             | 5.12           | 9.02            |
| 26               | 119.07                | 0.45             | 1.20          | 0.84            | 1.04             | 1.14           | 4.61              | 0.36            | 8.09            | 8.35             | 4.67           | 9.57            |
| 29               | 117.83                | 0.54             | 1.56          | 1.09            | 2.02             | 1.08           | 4.37              | 0.37            | 8.55            | 9.02             | 4.50           | 10.07           |
| 32               | 109.57                | 0.66             | 1.73          | 1.33            | 3.58             | 1.11           | 4.01              | 0.41            | 9.40            | 10.29            | 4.25           | 11.13           |
| 35               | 99.68                 | 0.82             | 1.73          | 1.55            | 5.26             | 1.18           | 3.63              | 0.49            | 10.95           | 12.37            | 3.95           | 12.98           |
| 38               | 91.76                 | 0.97             | 1.72          | 1.74            | 6.77             | 1.24           | 3.32              | 0.58            | 12.79           | 14.67            | 3.72           | 15.14           |
| 41               | 85.91                 | 1.07             | 1.72          | 1.86            | 7.92             | 1.29           | 3.10              | 0.66            | 14.27           | 16.51            | 3.58           | 16.90           |

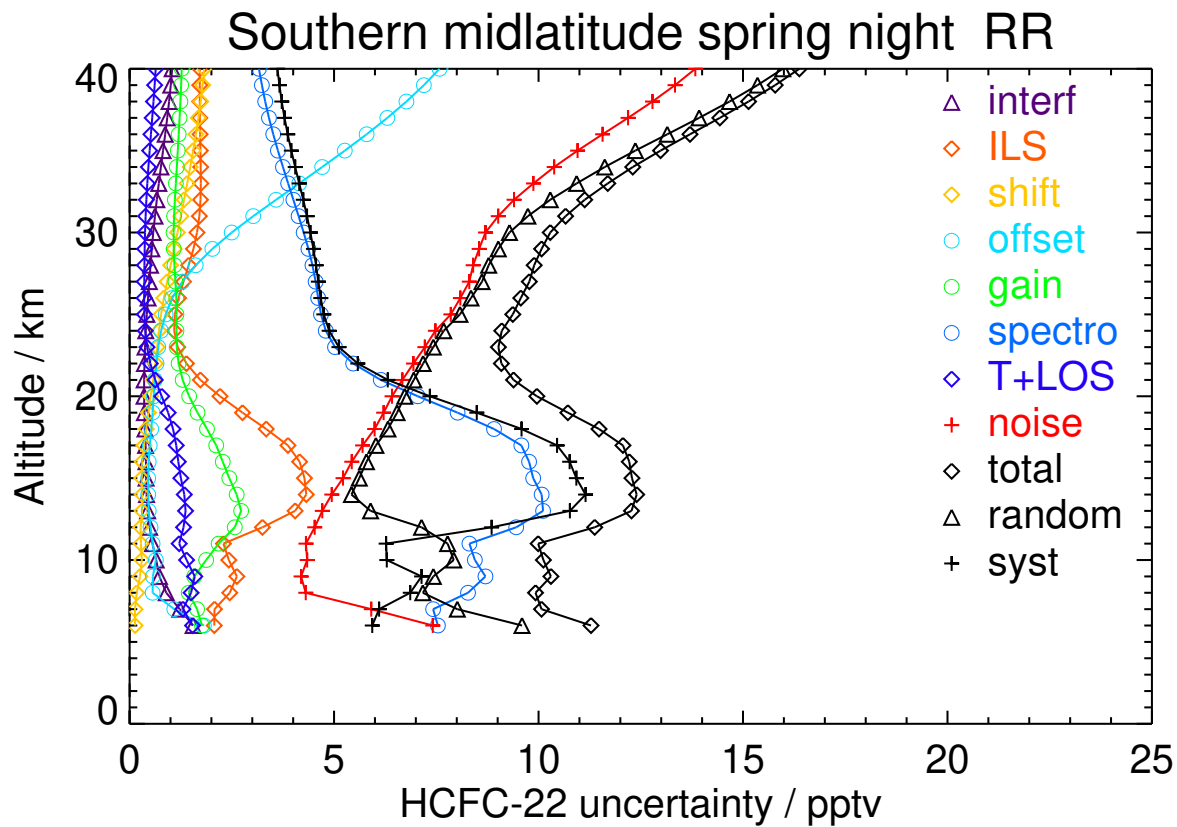

**Figure S56.** V8R\_F-22\_261 Southern midlatitude spring night

**Table S58.** HCFC-22 error budget for Southern midlatitude summer day. All uncertainties are  $1\sigma$ .

| altitude<br>(km) | mean target<br>(pptv) | interf<br>(pptv) | ILS<br>(pptv) | shift<br>(pptv) | offset<br>(pptv) | gain<br>(pptv) | spectro<br>(pptv) | T+LOS<br>(pptv) | noise<br>(pptv) | random<br>(pptv) | syst<br>(pptv) | total<br>(pptv) |
|------------------|-----------------------|------------------|---------------|-----------------|------------------|----------------|-------------------|-----------------|-----------------|------------------|----------------|-----------------|
| 8                | 183.70                | 1.07             | 2.14          | 0.26            | 0.76             | 1.35           | 8.75              | 1.36            | 4.95            | 7.64             | 7.26           | 10.54           |
| 11               | 184.42                | 0.66             | 3.84          | 0.26            | 0.53             | 1.17           | 10.25             | 1.61            | 4.15            | 8.70             | 8.13           | 11.91           |
| 14               | 175.12                | 0.42             | 4.18          | 0.32            | 0.39             | 2.44           | 9.23              | 1.13            | 4.64            | 5.54             | 10.06          | 11.48           |
| 17               | 163.81                | 0.38             | 3.83          | 0.32            | 0.42             | 1.92           | 9.31              | 0.95            | 5.39            | 5.70             | 10.14          | 11.63           |
| 20               | 137.05                | 0.34             | 2.50          | 0.44            | 0.55             | 1.49           | 8.65              | 0.88            | 6.14            | 6.62             | 8.86           | 11.06           |
| 23               | 121.32                | 0.36             | 1.49          | 0.54            | 0.63             | 1.14           | 6.29              | 0.56            | 6.94            | 7.15             | 6.42           | 9.61            |
| 26               | 112.25                | 0.43             | 1.34          | 0.68            | 0.87             | 0.86           | 4.95              | 0.44            | 7.79            | 7.92             | 5.15           | 9.45            |
| 29               | 104.48                | 0.50             | 1.61          | 0.95            | 1.59             | 0.69           | 4.10              | 0.41            | 8.30            | 8.54             | 4.42           | 9.62            |
| 32               | 100.98                | 0.62             | 1.71          | 1.32            | 2.90             | 0.70           | 3.56              | 0.45            | 8.72            | 9.33             | 3.98           | 10.14           |
| 35               | 97.61                 | 0.82             | 1.63          | 1.72            | 4.50             | 0.76           | 3.21              | 0.58            | 9.81            | 10.99            | 3.63           | 11.57           |
| 38               | 93.74                 | 1.01             | 1.54          | 2.02            | 6.07             | 0.84           | 2.98              | 0.71            | 11.49           | 13.23            | 3.39           | 13.66           |
| 41               | 90.12                 | 1.16             | 1.48          | 2.21            | 7.35             | 0.90           | 2.83              | 0.82            | 13.07           | 15.24            | 3.24           | 15.58           |

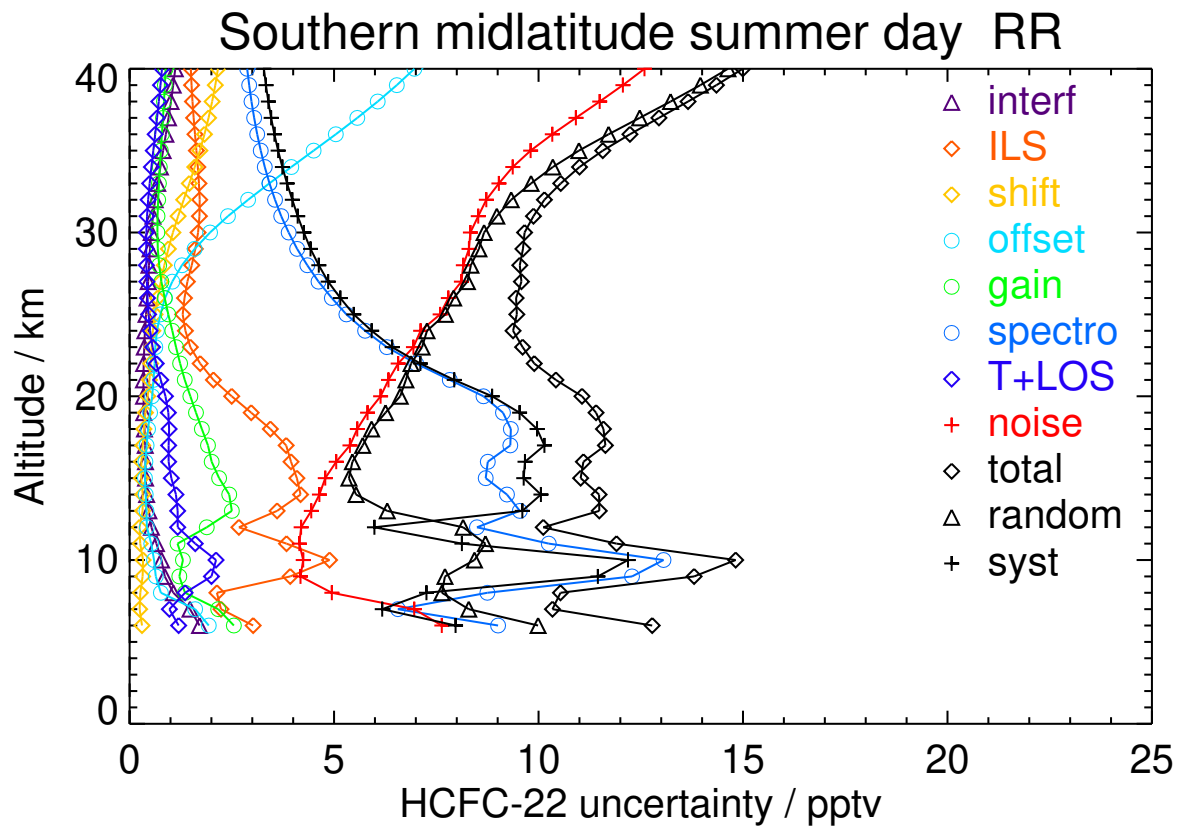

**Figure S57.** V8R\_F-22\_261 Southern midlatitude summer day

**Table S59.** HCFC-22 error budget for Southern midlatitude summer night. All uncertainties are  $1\sigma$ .

| altitude<br>(km) | mean target<br>(pptv) | interf<br>(pptv) | ILS<br>(pptv) | shift<br>(pptv) | offset<br>(pptv) | gain<br>(pptv) | spectro<br>(pptv) | T+LOS<br>(pptv) | noise<br>(pptv) | random<br>(pptv) | syst<br>(pptv) | total<br>(pptv) |
|------------------|-----------------------|------------------|---------------|-----------------|------------------|----------------|-------------------|-----------------|-----------------|------------------|----------------|-----------------|
| 8                | 183.89                | 1.01             | 2.83          | 0.20            | 0.57             | 0.76           | 9.59              | 1.59            | 4.64            | 6.51             | 9.15           | 11.23           |
| 11               | 185.70                | 0.63             | 2.93          | 0.20            | 0.52             | 1.37           | 8.18              | 1.32            | 4.11            | 7.25             | 6.65           | 9.83            |
| 14               | 174.42                | 0.42             | 5.18          | 0.33            | 0.43             | 2.71           | 10.54             | 1.30            | 4.62            | 5.41             | 11.81          | 12.99           |
| 17               | 157.10                | 0.38             | 3.84          | 0.34            | 0.44             | 2.08           | 9.07              | 0.98            | 5.34            | 5.72             | 9.93           | 11.46           |
| 20               | 135.73                | 0.34             | 2.21          | 0.46            | 0.54             | 1.68           | 7.87              | 0.81            | 6.12            | 6.55             | 8.10           | 10.41           |
| 23               | 121.06                | 0.36             | 1.31          | 0.55            | 0.63             | 1.30           | 6.03              | 0.54            | 6.92            | 7.16             | 6.13           | 9.42            |
| 26               | 113.66                | 0.43             | 1.37          | 0.71            | 0.86             | 0.93           | 4.85              | 0.44            | 7.75            | 7.91             | 5.04           | 9.38            |
| 29               | 106.03                | 0.50             | 1.68          | 0.97            | 1.55             | 0.73           | 4.01              | 0.41            | 8.29            | 8.53             | 4.38           | 9.59            |
| 32               | 100.68                | 0.62             | 1.86          | 1.35            | 2.81             | 0.75           | 3.42              | 0.44            | 8.65            | 9.23             | 3.94           | 10.04           |
| 35               | 94.93                 | 0.82             | 1.89          | 1.76            | 4.38             | 0.83           | 3.00              | 0.55            | 9.65            | 10.80            | 3.61           | 11.38           |
| 38               | 87.82                 | 1.02             | 1.90          | 2.08            | 5.95             | 0.92           | 2.74              | 0.67            | 11.27           | 12.98            | 3.41           | 13.42           |
| 41               | 81.71                 | 1.18             | 1.92          | 2.29            | 7.25             | 1.00           | 2.58              | 0.77            | 12.84           | 15.00            | 3.31           | 15.36           |

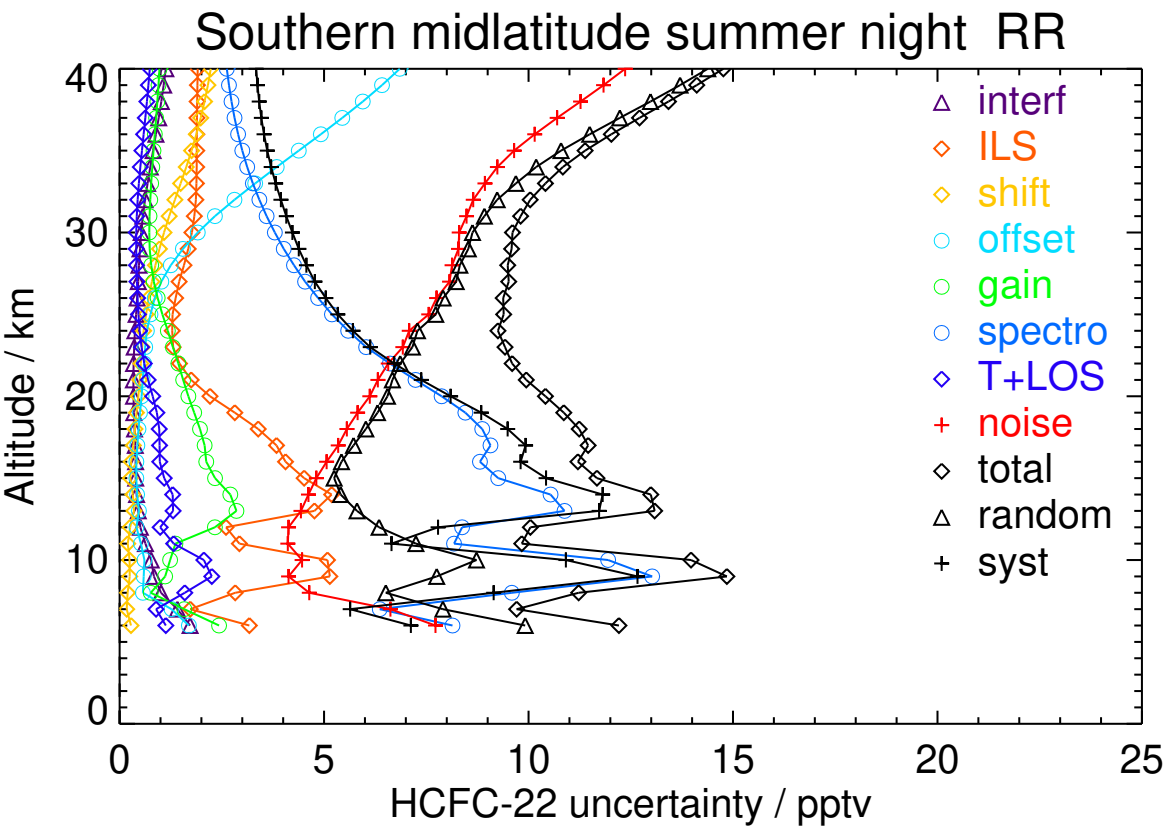

**Figure S58.** V8R\_F-22\_261 Southern midlatitude summer night

**Table S60.** HCFC-22 error budget for Southern midlatitude autumn day. All uncertainties are  $1\sigma$ .

| altitude<br>(km) | mean target<br>(pptv) | interf<br>(pptv) | ILS<br>(pptv) | shift<br>(pptv) | offset<br>(pptv) | gain<br>(pptv) | spectro<br>(pptv) | T+LOS<br>(pptv) | noise<br>(pptv) | random<br>(pptv) | syst<br>(pptv) | total<br>(pptv) |
|------------------|-----------------------|------------------|---------------|-----------------|------------------|----------------|-------------------|-----------------|-----------------|------------------|----------------|-----------------|
| 8                | 182.31                | 0.89             | 1.67          | 0.25            | 0.54             | 1.35           | 7.72              | 1.27            | 4.17            | 5.96             | 6.99           | 9.18            |
| 11               | 189.21                | 0.58             | 2.15          | 0.51            | 0.62             | 2.33           | 7.75              | 1.11            | 4.20            | 7.42             | 5.91           | 9.49            |
| 14               | 180.48                | 0.40             | 3.75          | 0.35            | 0.45             | 2.59           | 9.63              | 1.15            | 4.79            | 5.17             | 10.56          | 11.76           |
| 17               | 159.04                | 0.38             | 3.40          | 0.37            | 0.48             | 2.36           | 9.45              | 1.01            | 5.56            | 5.81             | 10.25          | 11.78           |
| 20               | 135.88                | 0.34             | 1.82          | 0.43            | 0.54             | 1.90           | 7.96              | 0.81            | 6.41            | 6.63             | 8.29           | 10.61           |
| 23               | 119.63                | 0.36             | 1.23          | 0.46            | 0.73             | 1.63           | 6.20              | 0.52            | 7.38            | 7.56             | 6.41           | 9.91            |
| 26               | 108.22                | 0.43             | 1.27          | 0.53            | 1.37             | 1.28           | 4.93              | 0.39            | 8.43            | 8.61             | 5.20           | 10.05           |
| 29               | 98.27                 | 0.52             | 1.43          | 0.69            | 2.72             | 1.14           | 3.99              | 0.35            | 9.07            | 9.54             | 4.33           | 10.48           |
| 32               | 90.12                 | 0.65             | 1.47          | 0.88            | 4.53             | 1.14           | 3.37              | 0.36            | 10.46           | 11.48            | 3.77           | 12.08           |
| 35               | 84.34                 | 0.79             | 1.44          | 1.05            | 6.26             | 1.18           | 2.97              | 0.42            | 12.32           | 13.91            | 3.42           | 14.32           |
| 38               | 80.53                 | 0.91             | 1.43          | 1.18            | 7.69             | 1.22           | 2.72              | 0.49            | 14.10           | 16.16            | 3.21           | 16.47           |
| 41               | 78.40                 | 0.99             | 1.41          | 1.29            | 8.65             | 1.22           | 2.56              | 0.55            | 15.30           | 17.67            | 3.07           | 17.94           |

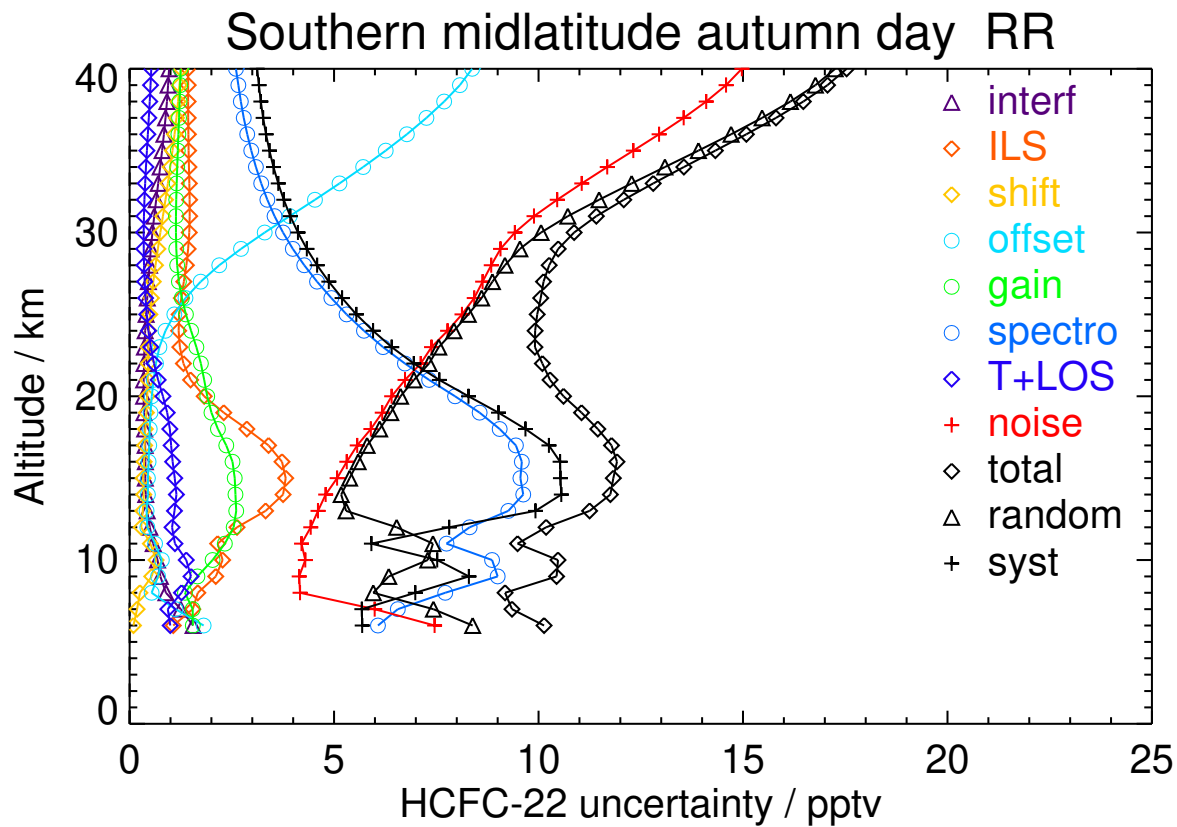

**Figure S59.** V8R\_F-22\_261 Southern midlatitude autumn day

**Table S61.** HCFC-22 error budget for Southern midlatitude autumn night. All uncertainties are  $1\sigma$ .

| altitude<br>(km) | mean target<br>(pptv) | interf<br>(pptv) | ILS<br>(pptv) | shift<br>(pptv) | offset<br>(pptv) | gain<br>(pptv) | spectro<br>(pptv) | T+LOS<br>(pptv) | noise<br>(pptv) | random<br>(pptv) | syst<br>(pptv) | total<br>(pptv) |
|------------------|-----------------------|------------------|---------------|-----------------|------------------|----------------|-------------------|-----------------|-----------------|------------------|----------------|-----------------|
| 8                | 185.34                | 0.95             | 2.12          | 0.19            | 0.53             | 1.34           | 8.29              | 1.37            | 4.39            | 6.77             | 7.19           | 9.87            |
| 11               | 190.60                | 0.63             | 2.51          | 0.23            | 0.53             | 1.49           | 8.91              | 1.36            | 4.20            | 7.99             | 6.66           | 10.40           |
| 14               | 183.50                | 0.42             | 4.20          | 0.38            | 0.46             | 2.76           | 10.38             | 1.24            | 4.80            | 5.21             | 11.45          | 12.58           |
| 17               | 162.83                | 0.38             | 3.77          | 0.36            | 0.47             | 2.36           | 9.81              | 1.06            | 5.55            | 5.84             | 10.70          | 12.19           |
| 20               | 135.86                | 0.34             | 2.21          | 0.47            | 0.59             | 2.25           | 7.96              | 0.85            | 6.40            | 6.69             | 8.42           | 10.75           |
| 23               | 120.97                | 0.37             | 1.43          | 0.62            | 0.82             | 1.87           | 6.15              | 0.52            | 7.39            | 7.65             | 6.40           | 9.97            |
| 26               | 112.40                | 0.43             | 1.30          | 0.60            | 1.33             | 1.25           | 5.07              | 0.39            | 8.28            | 8.48             | 5.31           | 10.00           |
| 29               | 102.13                | 0.52             | 1.47          | 0.75            | 2.57             | 0.96           | 4.26              | 0.35            | 8.96            | 9.39             | 4.56           | 10.44           |
| 32               | 92.42                 | 0.65             | 1.57          | 0.98            | 4.32             | 0.91           | 3.63              | 0.39            | 10.12           | 11.09            | 4.01           | 11.79           |
| 35               | 86.29                 | 0.81             | 1.61          | 1.20            | 6.05             | 0.94           | 3.20              | 0.46            | 11.89           | 13.44            | 3.64           | 13.93           |
| 38               | 82.28                 | 0.94             | 1.63          | 1.37            | 7.51             | 0.99           | 2.91              | 0.54            | 13.69           | 15.72            | 3.40           | 16.09           |
| 41               | 79.18                 | 1.03             | 1.66          | 1.47            | 8.57             | 1.03           | 2.73              | 0.60            | 15.01           | 17.40            | 3.27           | 17.71           |

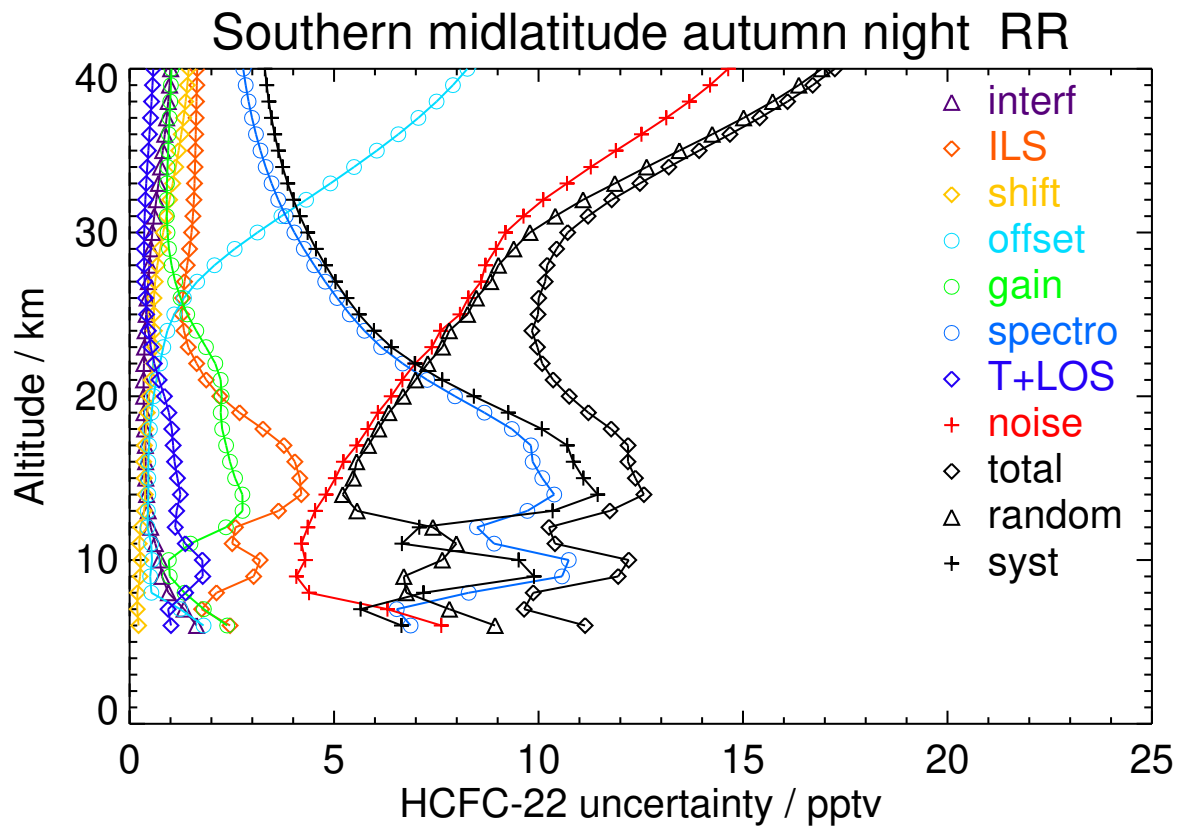

**Figure S60.** V8R\_F-22\_261 Southern midlatitude autumn night

Table S62. HCFC-22 error budget for Southern polar winter day. All uncertainties are  $1\sigma$ .

| altitude<br>(km) | mean target<br>(pptv) | interf<br>(pptv) | ILS<br>(pptv) | shift<br>(pptv) | offset<br>(pptv) | gain<br>(pptv) | spectro<br>(pptv) | T+LOS<br>(pptv) | noise<br>(pptv) | random<br>(pptv) | syst<br>(pptv) | total<br>(pptv) |
|------------------|-----------------------|------------------|---------------|-----------------|------------------|----------------|-------------------|-----------------|-----------------|------------------|----------------|-----------------|
| 5                | 181.37                | 1.66             | 0.84          | 0.13            | 2.11             | 1.53           | 7.05              | 1.64            | 7.69            | 9.22             | 6.06           | 11.03           |
| 8                | 190.91                | 0.69             | 1.57          | 0.21            | 0.59             | 1.82           | 7.31              | 1.34            | 4.24            | 6.53             | 6.10           | 8.93            |
| 11               | 186.70                | 0.45             | 3.04          | 0.31            | 0.58             | 2.81           | 10.77             | 1.68            | 4.67            | 5.38             | 11.38          | 12.59           |
| 14               | 158.39                | 0.41             | 3.28          | 0.30            | 0.57             | 2.24           | 10.41             | 1.54            | 5.51            | 5.91             | 11.07          | 12.55           |
| 17               | 128.92                | 0.40             | 2.69          | 0.26            | 0.68             | 1.76           | 8.84              | 1.16            | 6.64            | 6.90             | 9.33           | 11.60           |
| 20               | 105.36                | 0.38             | 1.82          | 0.25            | 1.03             | 1.31           | 6.91              | 0.90            | 7.84            | 8.06             | 7.17           | 10.78           |
| 23               | 83.71                 | 0.41             | 1.23          | 0.25            | 1.80             | 0.94           | 4.88              | 0.62            | 8.90            | 9.17             | 5.02           | 10.46           |
| 26               | 71.77                 | 0.46             | 1.06          | 0.36            | 3.15             | 0.76           | 3.39              | 0.42            | 9.94            | 10.49            | 3.54           | 11.07           |
| 29               | 64.34                 | 0.60             | 1.20          | 0.63            | 5.01             | 0.70           | 2.52              | 0.41            | 11.12           | 12.27            | 2.74           | 12.57           |
| 32               | 59.08                 | 0.83             | 1.45          | 0.94            | 6.96             | 0.70           | 2.10              | 0.56            | 13.00           | 14.84            | 2.46           | 15.04           |
| 35               | 55.37                 | 1.03             | 1.65          | 1.21            | 8.59             | 0.73           | 1.94              | 0.73            | 14.78           | 17.21            | 2.44           | 17.39           |
| 38               | 53.17                 | 1.19             | 1.80          | 1.42            | 9.77             | 0.73           | 1.87              | 0.87            | 16.15           | 19.01            | 2.50           | 19.18           |
| 41               | 47.15                 | 1.30             | 1.87          | 1.68            | 10.36            | 0.78           | 1.81              | 0.99            | 16.83           | 19.93            | 2.56           | 20.09           |

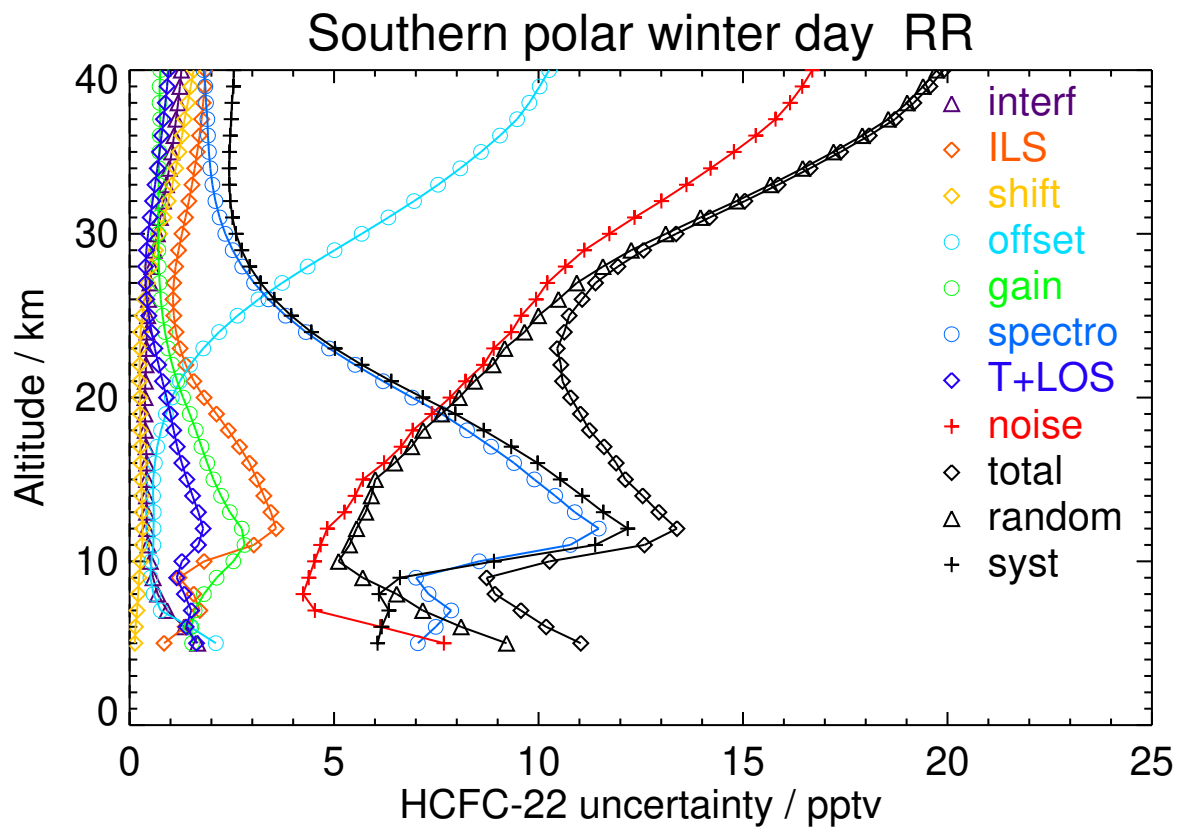

Figure S61. V8R\_F-22\_261 Southern polar winter day

Table S63. HCFC-22 error budget for Southern polar winter night. All uncertainties are  $1\sigma$ .

| altitude<br>(km) | mean target<br>(pptv) | interf<br>(pptv) | ILS<br>(pptv) | shift<br>(pptv) | offset<br>(pptv) | gain<br>(pptv) | spectro<br>(pptv) | T+LOS<br>(pptv) | noise<br>(pptv) | random<br>(pptv) | syst<br>(pptv) | total<br>(pptv) |
|------------------|-----------------------|------------------|---------------|-----------------|------------------|----------------|-------------------|-----------------|-----------------|------------------|----------------|-----------------|
| 5                | 185.76                | 1.75             | 1.45          | 0.22            | 2.10             | 0.96           | 8.06              | 1.93            | 7.82            | 9.68             | 6.83           | 11.85           |
| 8                | 192.32                | 0.70             | 1.68          | 0.22            | 0.53             | 1.48           | 7.61              | 1.62            | 4.12            | 6.22             | 6.69           | 9.13            |
| 11               | 189.72                | 0.47             | 2.64          | 0.28            | 0.54             | 2.71           | 9.76              | 1.59            | 4.65            | 5.32             | 10.30          | 11.59           |
| 14               | 164.43                | 0.41             | 3.10          | 0.29            | 0.55             | 2.23           | 9.51              | 1.45            | 5.42            | 5.77             | 10.19          | 11.71           |
| 17               | 135.38                | 0.40             | 2.85          | 0.33            | 0.67             | 1.71           | 8.52              | 1.14            | 6.47            | 6.69             | 9.10           | 11.29           |
| 20               | 114.48                | 0.38             | 2.21          | 0.32            | 0.99             | 1.30           | 7.18              | 0.91            | 7.68            | 7.89             | 7.54           | 10.91           |
| 23               | 93.08                 | 0.42             | 1.67          | 0.28            | 1.78             | 1.02           | 5.52              | 0.68            | 8.88            | 9.15             | 5.78           | 10.82           |
| 26               | 73.93                 | 0.47             | 1.44          | 0.39            | 3.17             | 0.82           | 3.90              | 0.49            | 9.98            | 10.52            | 4.18           | 11.32           |
| 29               | 60.39                 | 0.61             | 1.50          | 0.66            | 5.05             | 0.73           | 2.67              | 0.44            | 11.17           | 12.31            | 3.07           | 12.69           |
| 32               | 51.40                 | 0.82             | 1.68          | 0.96            | 6.98             | 0.72           | 1.96              | 0.54            | 13.02           | 14.85            | 2.58           | 15.07           |
| 35               | 46.25                 | 1.02             | 1.84          | 1.22            | 8.59             | 0.73           | 1.66              | 0.66            | 14.76           | 17.18            | 2.47           | 17.36           |
| 38               | 43.19                 | 1.17             | 1.99          | 1.45            | 9.74             | 0.74           | 1.55              | 0.79            | 16.06           | 18.91            | 2.51           | 19.07           |
| 41               | 48.24                 | 1.30             | 2.16          | 1.80            | 9.97             | 0.78           | 1.59              | 0.89            | 16.43           | 19.38            | 2.71           | 19.56           |

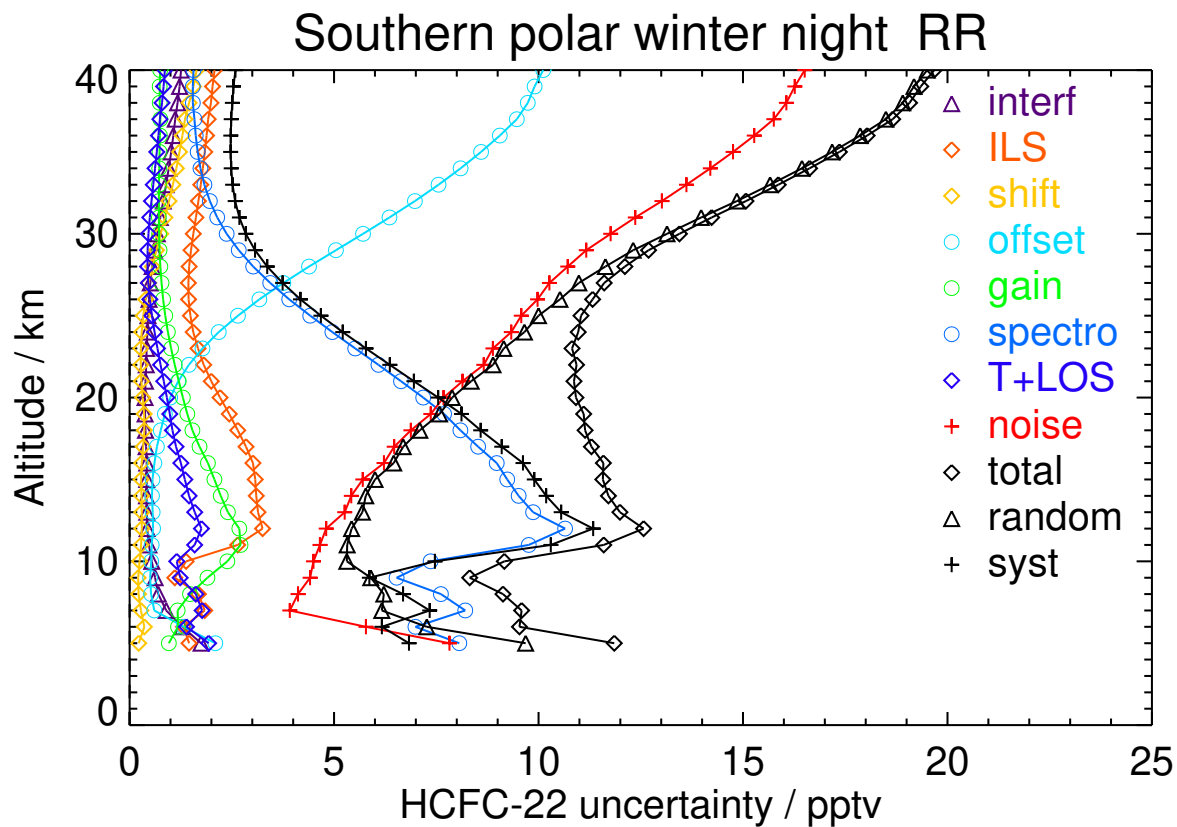

Figure S62. V8R\_F-22\_261 Southern polar winter night



Table S64. HCFC-22 error budget for Southern polar spring day. All uncertainties are 1 $\sigma$ .

| altitude<br>(km) | mean target<br>(pptv) | interf<br>(pptv) | ILS<br>(pptv) | shift<br>(pptv) | offset<br>(pptv) | gain<br>(pptv) | spectro<br>(pptv) | T+LOS<br>(pptv) | noise<br>(pptv) | random<br>(pptv) | syst<br>(pptv) | total<br>(pptv) |
|------------------|-----------------------|------------------|---------------|-----------------|------------------|----------------|-------------------|-----------------|-----------------|------------------|----------------|-----------------|
| 5                | 189.27                | 1.72             | 2.41          | 0.18            | 1.96             | 2.00           | 7.03              | 1.34            | 7.69            | 9.25             | 6.43           | 11.27           |
| 8                | 195.56                | 0.78             | 3.11          | 0.22            | 0.54             | 1.66           | 8.35              | 1.84            | 4.34            | 6.31             | 8.10           | 10.27           |
| 11               | 184.41                | 0.50             | 4.55          | 0.23            | 0.53             | 2.70           | 11.18             | 1.79            | 4.80            | 5.70             | 12.15          | 13.42           |
| 14               | 148.25                | 0.41             | 4.37          | 0.24            | 0.47             | 1.79           | 9.30              | 1.49            | 5.42            | 6.07             | 10.20          | 11.87           |
| 17               | 126.11                | 0.42             | 3.14          | 0.42            | 0.51             | 1.15           | 7.25              | 1.00            | 6.09            | 6.69             | 7.60           | 10.12           |
| 20               | 111.53                | 0.38             | 1.97          | 0.61            | 0.64             | 0.91           | 5.85              | 0.67            | 6.75            | 7.25             | 5.77           | 9.26            |
| 23               | 105.01                | 0.41             | 1.18          | 0.74            | 0.71             | 0.87           | 4.56              | 0.45            | 7.39            | 7.66             | 4.52           | 8.89            |
| 26               | 102.83                | 0.50             | 1.04          | 0.96            | 0.99             | 0.93           | 4.11              | 0.41            | 8.31            | 8.62             | 3.99           | 9.50            |
| 29               | 100.38                | 0.59             | 1.48          | 1.30            | 1.86             | 0.97           | 3.95              | 0.45            | 8.44            | 8.99             | 3.85           | 9.78            |
| 32               | 96.00                 | 0.77             | 1.88          | 1.68            | 3.35             | 1.03           | 3.70              | 0.53            | 9.26            | 10.21            | 3.81           | 10.90           |
| 35               | 90.42                 | 0.95             | 1.97          | 1.97            | 5.00             | 1.12           | 3.43              | 0.61            | 10.72           | 12.19            | 3.68           | 12.73           |
| 38               | 85.88                 | 1.09             | 1.93          | 2.16            | 6.50             | 1.20           | 3.19              | 0.69            | 12.59           | 14.49            | 3.53           | 14.92           |
| 41               | 82.19                 | 1.19             | 1.89          | 2.26            | 7.65             | 1.25           | 3.01              | 0.76            | 14.10           | 16.34            | 3.42           | 16.69           |

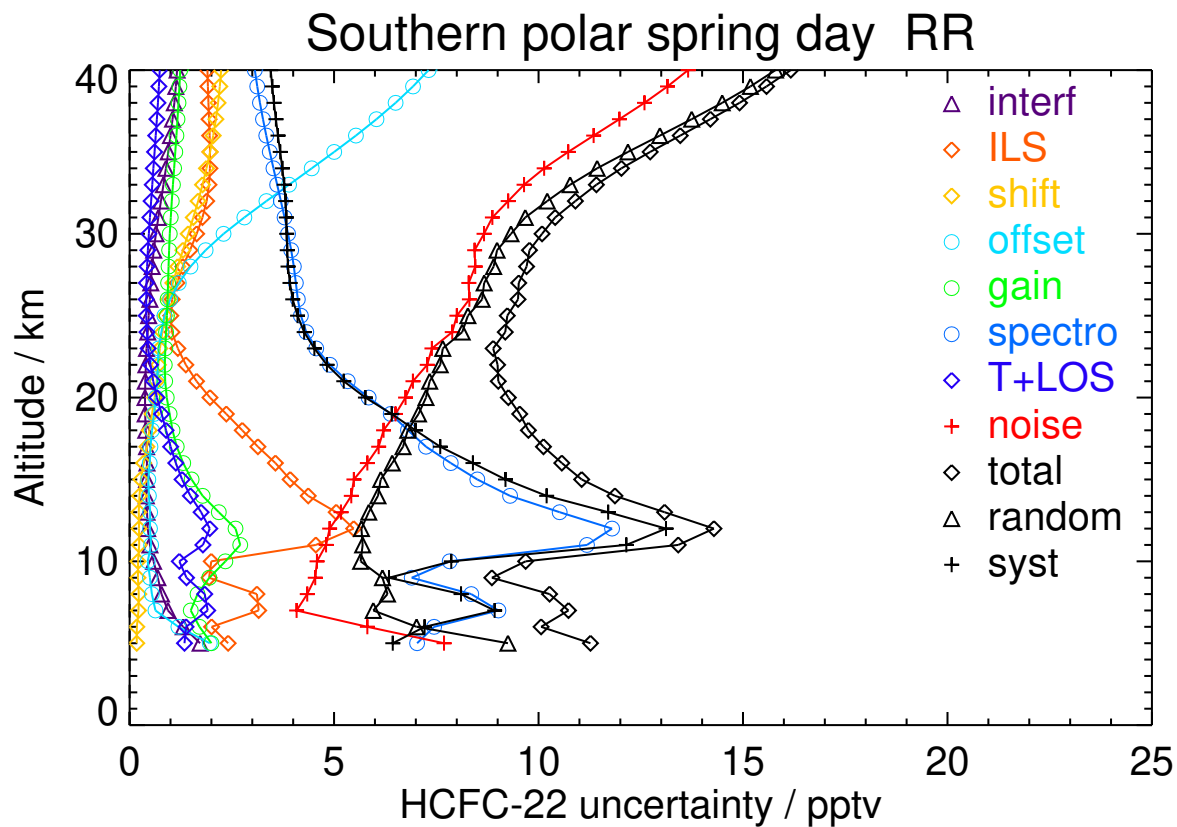

Figure S63. V8R\_F-22\_261 Southern polar spring day

Table S65. HCFC-22 error budget for Southern polar spring night. All uncertainties are  $1\sigma$ .

| altitude<br>(km) | mean target<br>(pptv) | interf<br>(pptv) | ILS<br>(pptv) | shift<br>(pptv) | offset<br>(pptv) | gain<br>(pptv) | spectro<br>(pptv) | T+LOS<br>(pptv) | noise<br>(pptv) | random<br>(pptv) | syst<br>(pptv) | total<br>(pptv) |
|------------------|-----------------------|------------------|---------------|-----------------|------------------|----------------|-------------------|-----------------|-----------------|------------------|----------------|-----------------|
| 5                | 191.28                | 1.72             | 1.90          | 0.08            | 1.90             | 1.47           | 7.18              | 1.44            | 7.67            | 9.13             | 6.44           | 11.17           |
| 8                | 195.63                | 0.73             | 2.54          | 0.15            | 0.48             | 1.51           | 7.98              | 1.63            | 4.39            | 6.74             | 7.05           | 9.75            |
| 11               | 184.57                | 0.47             | 4.10          | 0.23            | 0.53             | 2.76           | 11.97             | 1.74            | 4.70            | 7.15             | 11.93          | 13.90           |
| 14               | 151.81                | 0.40             | 4.32          | 0.26            | 0.44             | 1.97           | 9.32              | 1.31            | 5.25            | 6.37             | 9.93           | 11.80           |
| 17               | 128.64                | 0.41             | 3.58          | 0.47            | 0.49             | 1.41           | 7.76              | 0.93            | 5.88            | 6.68             | 8.15           | 10.54           |
| 20               | 115.18                | 0.38             | 1.96          | 0.69            | 0.60             | 1.41           | 5.75              | 0.60            | 6.53            | 7.04             | 5.76           | 9.10            |
| 23               | 111.64                | 0.41             | 1.13          | 0.82            | 0.68             | 1.27           | 4.90              | 0.41            | 7.20            | 7.69             | 4.59           | 8.96            |
| 26               | 112.07                | 0.49             | 1.10          | 1.01            | 0.98             | 1.06           | 4.93              | 0.38            | 8.19            | 8.84             | 4.23           | 9.80            |
| 29               | 109.56                | 0.57             | 1.57          | 1.25            | 1.83             | 1.11           | 4.63              | 0.39            | 8.36            | 9.14             | 4.12           | 10.02           |
| 32               | 102.19                | 0.72             | 1.98          | 1.54            | 3.30             | 1.18           | 4.49              | 0.45            | 9.19            | 10.37            | 4.04           | 11.13           |
| 35               | 94.58                 | 0.90             | 2.08          | 1.79            | 4.95             | 1.25           | 4.57              | 0.52            | 10.67           | 12.42            | 3.90           | 13.02           |
| 38               | 88.84                 | 1.05             | 2.06          | 1.97            | 6.45             | 1.31           | 4.73              | 0.60            | 12.55           | 14.79            | 3.76           | 15.26           |
| 41               | 84.45                 | 1.14             | 2.05          | 2.07            | 7.60             | 1.35           | 4.90              | 0.66            | 14.07           | 16.68            | 3.66           | 17.08           |

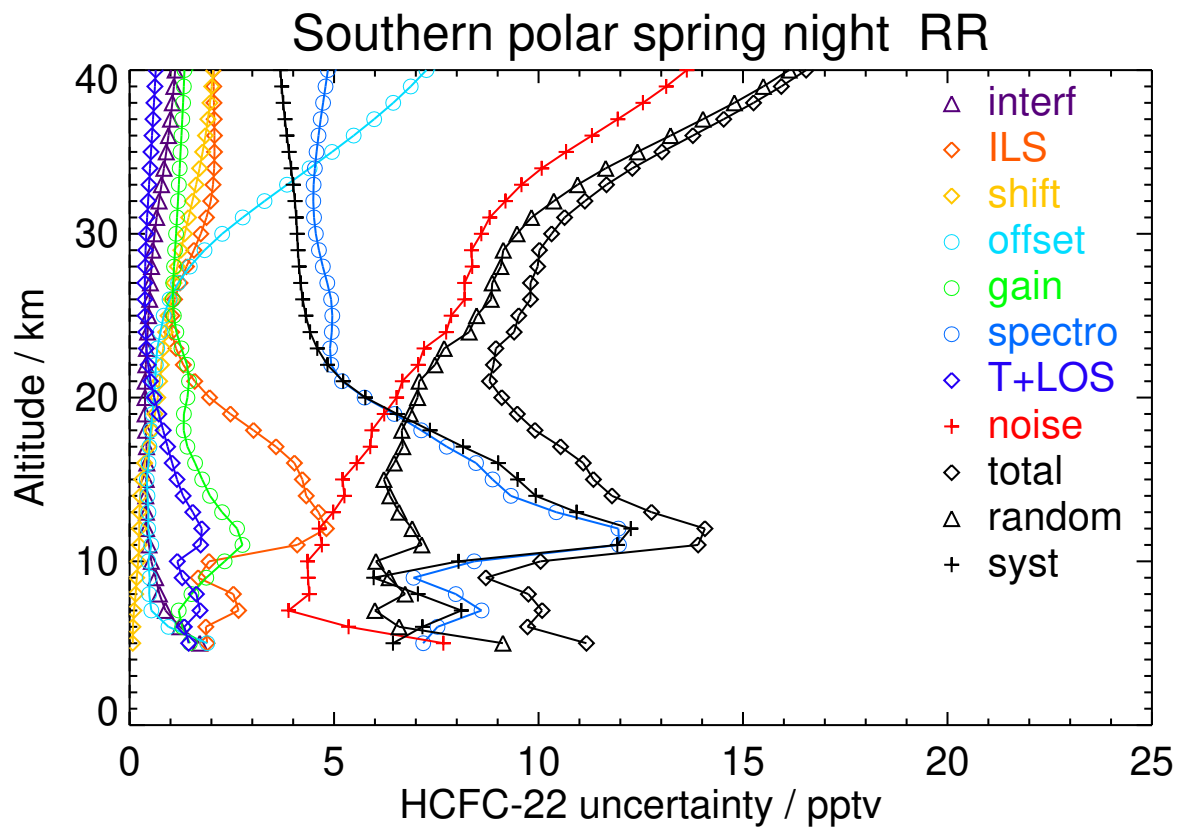

Figure S64. V8R\_F-22\_261 Southern polar spring night

Table S66. HCFC-22 error budget for Southern polar summer day. All uncertainties are  $1\sigma$ .

| altitude<br>(km) | mean target<br>(pptv) | interf<br>(pptv) | ILS<br>(pptv) | shift<br>(pptv) | offset<br>(pptv) | gain<br>(pptv) | spectro<br>(pptv) | T+LOS<br>(pptv) | noise<br>(pptv) | random<br>(pptv) | syst<br>(pptv) | total<br>(pptv) |
|------------------|-----------------------|------------------|---------------|-----------------|------------------|----------------|-------------------|-----------------|-----------------|------------------|----------------|-----------------|
| 5                | 186.21                | 1.77             | 4.54          | 0.34            | 1.79             | 3.30           | 9.94              | 1.50            | 7.88            | 9.39             | 10.62          | 14.18           |
| 8                | 184.96                | 0.83             | 4.64          | 0.22            | 0.53             | 0.64           | 14.02             | 2.02            | 4.06            | 5.68             | 14.42          | 15.50           |
| 11               | 177.76                | 0.52             | 1.98          | 0.20            | 0.39             | 2.09           | 7.87              | 0.92            | 4.12            | 5.84             | 7.37           | 9.41            |
| 14               | 171.78                | 0.38             | 4.55          | 0.35            | 0.35             | 2.05           | 8.44              | 0.99            | 4.62            | 5.06             | 9.66           | 10.90           |
| 17               | 150.74                | 0.40             | 3.72          | 0.43            | 0.39             | 1.91           | 8.78              | 0.88            | 5.22            | 5.44             | 9.67           | 11.09           |
| 20               | 127.09                | 0.34             | 1.40          | 0.66            | 0.59             | 1.82           | 6.76              | 0.60            | 5.84            | 6.08             | 7.03           | 9.29            |
| 23               | 115.74                | 0.35             | 1.50          | 0.70            | 0.67             | 2.32           | 5.17              | 0.38            | 6.47            | 6.83             | 5.54           | 8.80            |
| 26               | 110.04                | 0.43             | 1.55          | 0.62            | 0.78             | 1.74           | 4.51              | 0.36            | 7.80            | 7.98             | 4.92           | 9.38            |
| 29               | 101.66                | 0.48             | 1.74          | 0.77            | 1.47             | 1.13           | 4.02              | 0.38            | 8.03            | 8.24             | 4.48           | 9.38            |
| 32               | 95.68                 | 0.61             | 1.94          | 1.14            | 2.77             | 0.94           | 3.50              | 0.45            | 8.67            | 9.21             | 4.08           | 10.08           |
| 35               | 88.45                 | 0.82             | 1.86          | 1.58            | 4.36             | 0.93           | 3.06              | 0.58            | 9.73            | 10.84            | 3.66           | 11.44           |
| 38               | 81.17                 | 1.03             | 1.72          | 1.93            | 5.92             | 0.99           | 2.74              | 0.72            | 11.43           | 13.09            | 3.33           | 13.50           |
| 41               | 76.02                 | 1.20             | 1.64          | 2.18            | 7.21             | 1.04           | 2.54              | 0.84            | 12.99           | 15.10            | 3.13           | 15.43           |

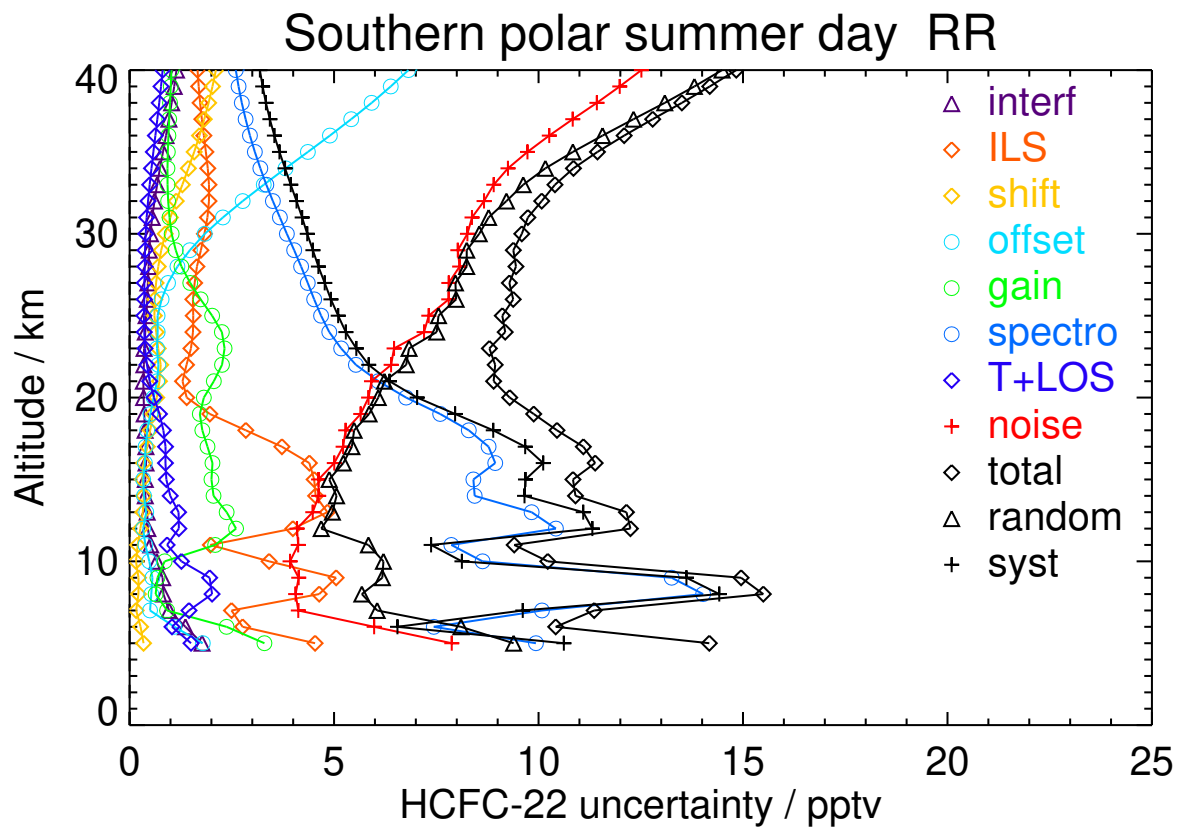

Figure S65. V8R\_F-22\_261 Southern polar summer day

Table S67. HCFC-22 error budget for Southern polar summer night. All uncertainties are  $1\sigma$ .

| altitude<br>(km) | mean target<br>(pptv) | interf<br>(pptv) | ILS<br>(pptv) | shift<br>(pptv) | offset<br>(pptv) | gain<br>(pptv) | spectro<br>(pptv) | T+LOS<br>(pptv) | noise<br>(pptv) | random<br>(pptv) | syst<br>(pptv) | total<br>(pptv) |
|------------------|-----------------------|------------------|---------------|-----------------|------------------|----------------|-------------------|-----------------|-----------------|------------------|----------------|-----------------|
| 5                | 179.51                | 1.78             | 5.14          | 0.43            | 1.96             | 3.98           | 15.81             | 1.73            | 7.64            | 12.14            | 14.62          | 19.00           |
| 8                | 182.14                | 0.82             | 4.25          | 0.24            | 0.52             | 0.81           | 13.39             | 2.02            | 3.86            | 5.36             | 13.76          | 14.76           |
| 11               | 181.79                | 0.52             | 1.25          | 0.15            | 0.30             | 1.72           | 6.36              | 0.74            | 3.89            | 4.94             | 6.06           | 7.82            |
| 14               | 169.64                | 0.38             | 4.95          | 0.32            | 0.34             | 2.36           | 9.22              | 1.09            | 4.48            | 4.83             | 10.65          | 11.69           |
| 17               | 155.58                | 0.39             | 3.78          | 0.42            | 0.39             | 2.09           | 8.84              | 0.88            | 5.13            | 5.35             | 9.78           | 11.15           |
| 20               | 129.15                | 0.34             | 1.39          | 0.56            | 0.49             | 1.62           | 7.07              | 0.66            | 5.84            | 5.96             | 7.36           | 9.47            |
| 23               | 114.77                | 0.35             | 0.92          | 0.55            | 0.56             | 1.31           | 5.21              | 0.40            | 6.60            | 6.70             | 5.40           | 8.61            |
| 26               | 107.92                | 0.43             | 1.35          | 0.63            | 0.84             | 1.16           | 4.49              | 0.37            | 7.91            | 8.03             | 4.77           | 9.34            |
| 29               | 100.21                | 0.49             | 1.78          | 0.82            | 1.63             | 0.93           | 3.94              | 0.38            | 8.17            | 8.42             | 4.38           | 9.49            |
| 32               | 89.46                 | 0.61             | 1.85          | 1.17            | 3.01             | 0.84           | 3.33              | 0.43            | 8.82            | 9.44             | 3.87           | 10.20           |
| 35               | 80.41                 | 0.80             | 1.79          | 1.57            | 4.65             | 0.86           | 2.83              | 0.53            | 9.98            | 11.18            | 3.42           | 11.69           |
| 38               | 73.51                 | 0.99             | 1.76          | 1.87            | 6.23             | 0.91           | 2.50              | 0.65            | 11.73           | 13.47            | 3.13           | 13.83           |
| 41               | 68.28                 | 1.14             | 1.77          | 2.08            | 7.50             | 0.97           | 2.30              | 0.75            | 13.29           | 15.48            | 2.99           | 15.76           |

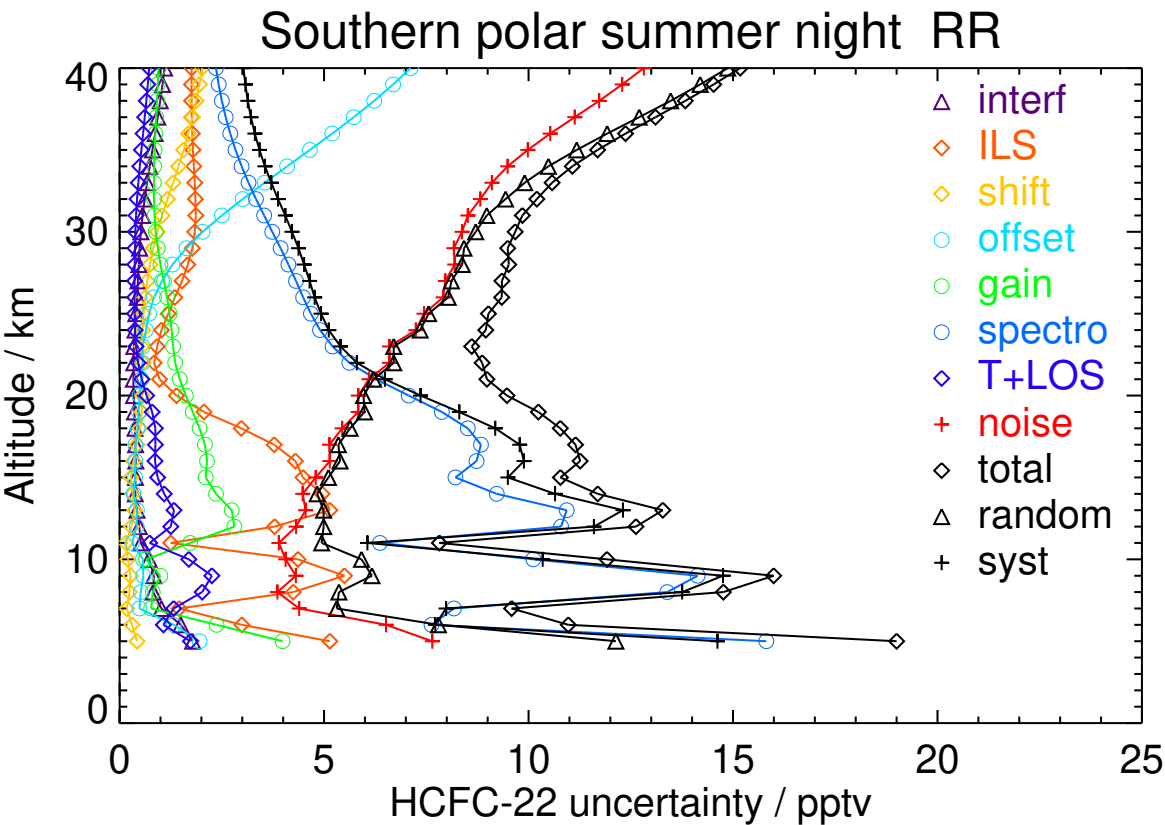

Figure S66. V8R\_F-22\_261 Southern polar summer night

Table S68. HCFC-22 error budget for Southern polar autumn day. All uncertainties are  $1\sigma$ .

| altitude<br>(km) | mean target<br>(pptv) | interf<br>(pptv) | ILS<br>(pptv) | shift<br>(pptv) | offset<br>(pptv) | gain<br>(pptv) | spectro<br>(pptv) | T+LOS<br>(pptv) | noise<br>(pptv) | random<br>(pptv) | syst<br>(pptv) | total<br>(pptv) |
|------------------|-----------------------|------------------|---------------|-----------------|------------------|----------------|-------------------|-----------------|-----------------|------------------|----------------|-----------------|
| 5                | 184.19                | 1.73             | 1.86          | 0.16            | 2.00             | 2.32           | 6.93              | 1.12            | 7.67            | 9.17             | 6.31           | 11.13           |
| 8                | 184.51                | 0.75             | 1.64          | 0.14            | 0.45             | 1.10           | 7.49              | 1.06            | 4.10            | 5.25             | 7.16           | 8.88            |
| 11               | 183.98                | 0.49             | 2.06          | 0.27            | 0.45             | 2.34           | 8.14              | 0.95            | 4.34            | 5.63             | 8.03           | 9.81            |
| 14               | 172.75                | 0.38             | 3.73          | 0.35            | 0.43             | 2.58           | 9.73              | 1.08            | 4.96            | 5.24             | 10.68          | 11.90           |
| 17               | 148.32                | 0.39             | 2.96          | 0.39            | 0.47             | 2.23           | 9.02              | 0.95            | 5.78            | 5.98             | 9.70           | 11.40           |
| 20               | 124.45                | 0.35             | 1.43          | 0.41            | 0.59             | 1.83           | 6.90              | 0.68            | 6.66            | 6.86             | 7.17           | 9.92            |
| 23               | 109.46                | 0.37             | 0.95          | 0.32            | 0.96             | 1.52           | 5.47              | 0.44            | 7.62            | 7.76             | 5.68           | 9.62            |
| 26               | 95.17                 | 0.45             | 0.94          | 0.34            | 2.06             | 1.29           | 4.50              | 0.36            | 8.89            | 9.17             | 4.73           | 10.32           |
| 29               | 83.55                 | 0.55             | 1.13          | 0.46            | 3.92             | 1.14           | 3.65              | 0.34            | 10.00           | 10.79            | 3.94           | 11.49           |
| 32               | 74.10                 | 0.70             | 1.32          | 0.62            | 5.99             | 1.09           | 3.00              | 0.39            | 12.09           | 13.55            | 3.39           | 13.96           |
| 35               | 66.73                 | 0.85             | 1.46          | 0.78            | 7.74             | 1.09           | 2.57              | 0.47            | 14.07           | 16.12            | 3.07           | 16.41           |
| 38               | 62.04                 | 0.96             | 1.56          | 0.90            | 9.05             | 1.10           | 2.31              | 0.55            | 15.64           | 18.14            | 2.91           | 18.37           |
| 41               | 61.81                 | 1.02             | 1.58          | 1.11            | 9.54             | 1.15           | 2.13              | 0.61            | 16.24           | 18.92            | 2.82           | 19.13           |

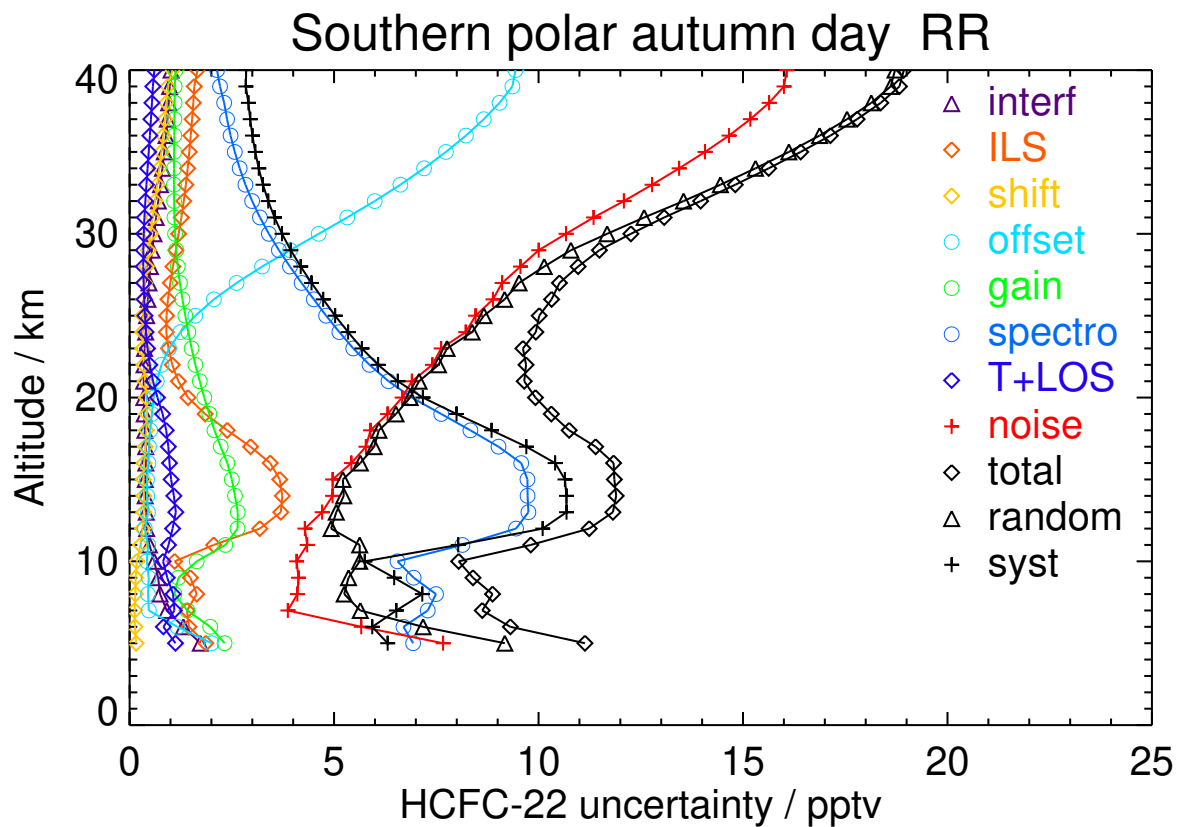

Figure S67. V8R\_F-22\_261 Southern polar autumn day

Table S69. HCFC-22 error budget for Southern polar autumn night. All uncertainties are 1σ.

| altitude<br>(km) | mean target<br>(pptv) | interf<br>(pptv) | ILS<br>(pptv) | shift<br>(pptv) | offset<br>(pptv) | gain<br>(pptv) | spectro<br>(pptv) | T+LOS<br>(pptv) | noise<br>(pptv) | random<br>(pptv) | syst<br>(pptv) | total<br>(pptv) |
|------------------|-----------------------|------------------|---------------|-----------------|------------------|----------------|-------------------|-----------------|-----------------|------------------|----------------|-----------------|
| 5                | 180.41                | 1.68             | 1.78          | 0.17            | 1.86             | 2.18           | 6.20              | 0.92            | 7.31            | 8.25             | 6.24           | 10.35           |
| 8                | 186.04                | 0.78             | 2.10          | 0.18            | 0.48             | 0.96           | 8.77              | 1.38            | 4.30            | 5.77             | 8.38           | 10.17           |
| 11               | 184.56                | 0.51             | 1.91          | 0.26            | 0.47             | 2.28           | 8.08              | 0.97            | 4.44            | 5.28             | 8.22           | 9.77            |
| 14               | 171.94                | 0.38             | 3.60          | 0.35            | 0.45             | 2.39           | 10.04             | 1.20            | 5.06            | 5.35             | 10.88          | 12.13           |
| 17               | 140.97                | 0.39             | 3.08          | 0.38            | 0.51             | 2.06           | 9.17              | 0.99            | 5.91            | 6.18             | 9.81           | 11.60           |
| 20               | 118.02                | 0.35             | 1.40          | 0.39            | 0.63             | 1.50           | 6.58              | 0.67            | 6.82            | 6.97             | 6.82           | 9.75            |
| 23               | 105.43                | 0.38             | 1.00          | 0.34            | 1.08             | 1.31           | 5.30              | 0.43            | 7.82            | 7.98             | 5.47           | 9.67            |
| 26               | 91.53                 | 0.45             | 1.04          | 0.33            | 2.26             | 1.17           | 4.46              | 0.35            | 9.09            | 9.41             | 4.68           | 10.51           |
| 29               | 78.31                 | 0.56             | 1.22          | 0.44            | 4.19             | 1.05           | 3.67              | 0.35            | 10.31           | 11.18            | 3.97           | 11.86           |
| 32               | 67.95                 | 0.73             | 1.41          | 0.61            | 6.28             | 1.01           | 3.01              | 0.41            | 12.43           | 13.98            | 3.42           | 14.39           |
| 35               | 60.93                 | 0.87             | 1.55          | 0.76            | 8.02             | 1.02           | 2.55              | 0.50            | 14.38           | 16.53            | 3.08           | 16.81           |
| 38               | 56.26                 | 0.98             | 1.65          | 0.88            | 9.32             | 1.03           | 2.25              | 0.58            | 15.90           | 18.50            | 2.90           | 18.72           |
| 41               | 54.14                 | 1.05             | 1.69          | 1.14            | 9.62             | 1.10           | 2.12              | 0.60            | 16.32           | 19.03            | 2.81           | 19.24           |

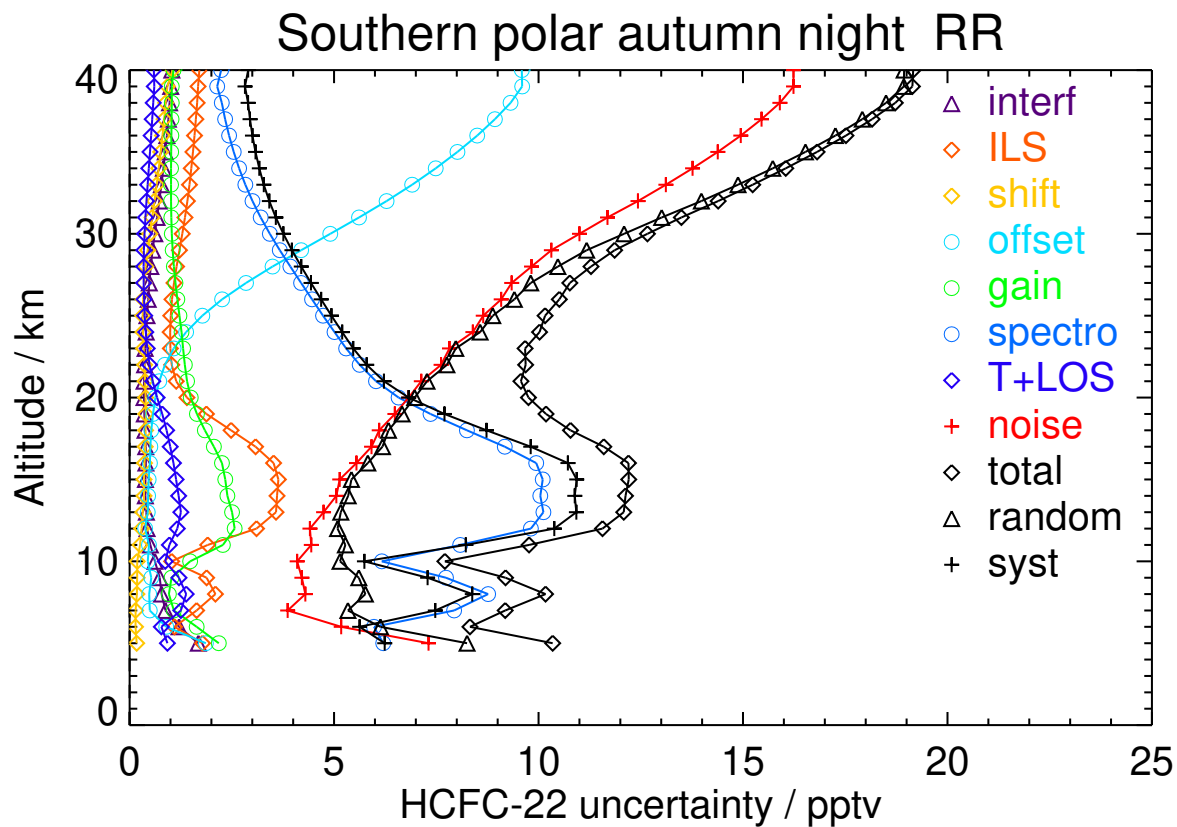

Figure S68. V8R\_F-22\_261 Southern polar autumn night
